# Supplementary material
Source: PubMed Central journal article supplement (PMC4640759)
Supplement: pnas.201511740SI.pdf [file pnas.201511740SI.pdf]

# Supporting Information

Blesneac et al. 10.1073/pnas.1511740112

## SI Materials and Methods

**Cell Culture and Heterologous Expression.** HEK-293T cells were grown in a DMEM (DMEM/F-12; Invitrogen) containing 10% (vol/vol) FBS and maintained under standard conditions at 37 °C in a humidified atmosphere containing 5% CO<sub>2</sub>. Cells were transfected using the jetPEI Transfection Reagent (Polyplus-Transfection Inc.) with either WT or mutant Cav3.2 channel. All of the constructs carried an HA epitope on the extracellular SS1-SS2 loop of domain I (1), an epitope useful for their detection and immunoprecipitation. Cells for electrophysiology experiments were cotransfected with EGFP-expressing vector to allow the identification of expressing cells. Cells were used 48–72 h after transfection.

**Immunoprecipitation of Cav3.2 Channels.** Rat brain tissue (four brains per immunoprecipitation excluding the cerebellum) was homogenized in 10% (wt/vol) lysis buffer (125 mM NaCl, 1% Nonidet P-40, 0.1% SDS, 50 mM Tris, pH 7.5 including a protease inhibitor mixture; Roche) and phosphatase inhibitors (50 mM sodium fluoride, 1 mM sodium orthovanadate, 5 mM sodium pyrophosphate, 25 mM β-glycerophosphate, 2 mM EDTA, 2 mM EGTA). The homogenate was centrifuged at 1,000 × *g* for 10 min, and the supernatant was collected and centrifuged again at 13,000 × *g* for 30 min at 4 °C. All of the resulting supernatant was further incubated with an antibody directed against a peptide in the C-terminal part of the protein Cav3.2 (100 μg per immunoprecipitation; sc-16263; Santa Cruz) for 3 h at 4 °C under gentle agitation. Protein G magnetic beads (Dynabeads Protein G; Life Technologies) were then added (1/100 v/v) followed by gentle agitation at 4 °C. After 1 h, the beads were recovered and washed three times with 1 mL cold lysis buffer. Elution was done by the addition of 140 μL NuPAGE LDS Sample Buffer (Life Technologies) supplemented with 6% (vol/vol) SDS and 10 mM DTT.

For immunoprecipitation of the Cav3.2 channels from transfected HEK293T cells, the cells (five 100-mm confluent cell culture plates per immunoprecipitation) were lysed using the lysis buffer described above. After 30–60 min incubation on a rotation wheel, the lysate was centrifuged for 20 min at 16,000 × *g* at 4 °C. All of the recovered supernatant was further incubated with 100 μL anti-HA agarose beads (reference A2095; Sigma). After 3 h at 4 °C on a rotation wheel, the beads were packed in a column, washed with 10 mL cold lysis buffer, and eluted as above.

**In-Gel Digestion.** After alkylation for 30 min with 50 mM iodoacetamide, all of the eluted proteins obtained from the step described above were separated by SDS/PAGE and visualized by staining with Protein Staining Solution (Euromedex). The band corresponding to Cav3.2 was excised, diced into small pieces, and destained with 50% (vol/vol) acetonitrile in 50 mM ammonium bicarbonate. The gel band was further dehydrated by the addition of 100% acetonitrile and dried in a speed vacuum concentrator. Dried gel pieces were swollen with 25 mM ammonium bicarbonate containing 1 μg trypsin or chymotrypsin (ThermoScientific) and 20% (vol/vol) acetonitrile and incubated at 30 °C for 16 h. Digested peptide mixtures were extracted with 50% acetonitrile and then, two times with a solution containing 50% acetonitrile and 2.5% (vol/vol) formic acid. The extracted peptides were dried in a speed vacuum concentrator and stored at –20 °C until liquid chromatography–mass spectrometry (MS)/MS.

**MS.** The stored peptides were resuspended in 0.1% formic acid and analyzed using an Ultimate 3000 HPLC (ThermoScientific) directly coupled to an LTQ Orbitrap (XL, VELOS, or ELITE Pro;

ThermoScientific). Desalting and pre-concentration of samples were performed online on a Pepmap Precolumn (0.3 × 10 mm; ThermoScientific). A gradient consisting of 2–40% buffer B (3–33 min), 40–80% buffer B (33–34 min), and 80–0% buffer B (49–50 min) equilibrated for 20 min in 0% B (50–70 min) was used to elute peptides at 300 nL/min from a Acclaim Pepmap100 C18 Capillary (0.075 × 150-mm) Reverse-Phase Column (ThermoScientific). Buffer A consisted of 0.1% formic acid in water, and buffer B consisted of 100% acetonitrile with 0.1% formic acid. Mass spectra were acquired using a top 10 collision-induced dissociation data-dependent acquisition method. The LTQ-Orbitrap was programmed to perform a Fourier transform (FT) full scan (60,000 resolution) on a 400- to 1,400-Th mass range with the top 10 ions from each scan selected for LTQ-MS/MS with multistage activation on the neutral losses of 24.49, 32.66, and 48.99 Th. FT spectra were internally calibrated using a single lock mass (445.120024 Th). Target ion numbers were 500,000 for FT full scan on the Orbitrap and 10,000 MSn on the LTQ. Top six per 30-Da windows peak lists were extracted using MSconvert 3.0 and searched with Mascot 2.4 against the Swissprot Database for rat or Complete Proteome Set Database for human (68,511 entries for the human database and 27,815 entries for the rat database) with 7-ppm precursor mass tolerance, 0.6-Da fragment mass tolerance, and semitrypsin or chymotrypsin digestion. Carbamidomethylation of cysteines was set as static modification, and oxidation of methionine and phosphorylation of Ser, Thr, and Tyr were set as variable modifications. MS/MS spectra matching phosphorylated peptides with ion score over 15 were inspected manually and/or by using Prohossi software (2).

**Molecular Biology.** Mutagenesis of hCav3.2-pcDNA3.1 was performed using the QuikChange II XL Site-Directed Mutagenesis Kit (Agilent). The construction of the N-ter Ala mutant bearing five mutated serine residues (S29A, S32A, S49A, S51A, and S53A) was done in two steps: (i) generation of the triple mutant S49A, S51A, and S53A using the following primers: HS49AS51AS53A forward: 5'-ccgagctcggcgtggcaccgccgagcccccggcgcc-3'; hs49as51as53a reverse: 5'-cgcccgccggggcctcggcggtgccacgccgagctcgg-3'; and (ii) mutation of the construct generated in the first step on S29A and S32A using primers HS29AS32A forward: 5'-gcgttggtggggcgcccccggagcccccggcgcc-3' and HS29AS32A reverse: 5'-gcgccccggggcctcggcgccgccccaccaacgc-3'. The LI-IIA Ala mutant, bearing seven mutated serine and threonine residues (S442A, S4445A, T446A, S532A, S535A, S558A, and S561A) was constructed in three steps: (i) mutation of S442A, S4445A, T446A using primers HS442AS445AT446A forward: 5'-gcagcgggacgcaccctggccaacgcagccgctgcccagcttc-3' and HS442AS445AT446A reverse: 5'-gaagctggccagcgcgctgctgtggccaggtggcgtcccctgc-3'; (ii) mutation of the construct generated in i on S558A and S561A using primers S558S561 forward: ggccgcccccgccacctgccccagccgcccggacc and S558S561 reverse: ggtccggcctggggcaggtggcgccggggcgccgccc; and (iii) mutation of the construct generated in ii on S532A and S535A using primers HS532AS535A forward: 5'-cactaccatttcgccatggcgcccccgagccc-3' and HS532AS535A reverse: 5'-gggctcggggggcgccatggcgaaatgtagtg-3'. For the LI-IIB Ala mutant (having eight phosphosites mutated: S650A, S653A, S687A, S715A, S717A, S749A, T751A, and S758A), a synthetic cDNA (660 bp) was generated (Euofins) corresponding to the regions coding for part B of the loop I-II with the mutated phosphosites. The sequence was as follows: 5'-tccgacagggacagggaacggcgccgtccacttcgaggaggactccacaagctcagagaactccagaccagagctgaagatgtgtccctggccgtggcccacaacgggacactggaggagcagcgcctggccccctccctcatcatgtgcacagctgccacgccatgctacccccaggccaccattcctgagat-



A

1 MTEGTLAADE VRVPLGASFP APAAPVRASP ASPGAPGREE QGGSGSGVLA PESPGTECGA DLGADEEQPV PYPALAAATVF FCLGQTTTRP SWCLRLVCNP  
 101 WFEHISMLVI MLNCVTLGMF RPCEDVECRS ERCSILEAFD DFIFAFFAVE MVIKMVALGL FGQKCYLGDV WNRLDFFIVM AGMMEYSLDG HNVLSAISRT  
 201 VRVLRPLRAI NRVPSMRILV TLLDLDLPLML GNVLCCFFV FFIQVIGVQ LWAGLLRNRC FLDSAFVRNN NLTLFLRPPYQ TEEGEENPFI CSSRRDNGMQ  
 301 KCSHIPSRRE LRVQCTLGWE AYQQAEDG GAGRACINW NQYINVCRSQ EFNPHNGAIN FDNIGYAWIA IFQVITLEGW VDIMYYVMDA HSFYNYFYFI  
 401 LLIIIVGFFM INLCLVVIAT QFSETKQREN QLMREQRARY LSNDSTLASF SEPGSCYEEL LKYVGHIFRK VKRRSLRLYA RWQSRWRKVV DPSSTVHGQC  
 501 PGRPRRAGR RTASVHHLVY HHHHHHHHHY HFSHGGPRRF SPEPGAGDNR LVRACAPSPS PSPGHGPPDS ESVHSIYHAD CHVEGQPERA RVAHSIATAA  
 601 SLKLASGLGT MNYPTILPSC TVNSKGGTSS RPKGLRGAGA PGAAVHSPLS LGSPPRYEKI QHVVGEGQLG RASSHLSGLS VPCPLSPQA GTLTCELKSC  
 701 PYCASALEDP EFEGSGESG DSDAHGVYEF TDQVRHGDCR DPVQQPHEVG TPGHNSRERR TPLRKASQPG GIGHLWASFS GKLRRIVDSK YFNRGIMAAI  
 801 LVNLTSMGVY YHEQPEELTN ALEISNIVFT SMFALEMLK LLACGFLGYI RNPNYIFDGI VVVISVWEIV GQADGGLSVL RTFRLRLVLR LVRFLPALRR  
 901 QLVVLMRMD NVATFCMLLM LFIFIFISILG MHLFGCKFSL KTDSDGTVDP RKNFDLLWA IVTVFQILTQ EDWNVVLYNG MASTSSWAAL YFVALMTFGN  
 1001 YVLFNLVVAI LVEGFQAEDG ATRSDTDEDK TSTQLEGDFD KLRDLRATEM KMYSLAVTPN GHLEGRGSLF PPLITHTAAT PMPTPKSSPN LDVAHALDLS  
 1101 RRSRSGSVDP QLDGQKSLAS LRSSPCTPWC PNSAGSSRRS SWNSLGRAPS LKRRSQCGER ESLLSGEGEK STDDEADSR PSTGTHPGAS PGRATPLRR  
 1201 AESLDHRSTL DLCPRPAAAL LPTKFDHCNG QMVALPSEFF LRIDSHKEDA AEFDDDIEDS CCFRLHKVLE PYAPQWCRSR ESWALYLFPP QNRLRVSCQK  
 1301 VIAHKMFDHV LVVFIPLNCI TIALERPDID PGSTERAFLS VSNYIFTAIF VVEMMKVVA LGLLWGEHAY LQSSWNLVDG LVLVSLVDI IVAMASAGGA  
 1401 KILGVLRLVR LLRTLRLRVR ISRAPGLKLV VETLISSLRP IGNIVLICCA FFIIFGILGV QLFKGFYYC EGTDRNITT KAECCHAAHYR WVRKYNFDN  
 1501 LRQALMSLVF LSSKDGWNI MYDGLDAVGI DQQPQVQHNH MLLYFISFL LIVSFFVLMN FVGVVVENFH KCRQHQAEE ARRREEKRLR RLERRRKAQT  
 1601 RRPYYADYSH TRRSIHSICT SHYLDLFTF IICLNVTMS MEHYNQPKSL DEALKYCNV FTIVVFEEA LKLVAFGFR FFKDRWNQLD LAIVLDSIMG  
 1701 IALEEIEAMA ALPINTIIR IMRVLRIARV LKLLKMATGM RALLDVTQQA LPQVNLGLL FMLLFFIYAA LGVELFGRLE CSEDNPCEGL SRHATFTNFG  
 1801 MAFLLTFRVS TGDNWNIGIM DTLRECTRED KHCLSYLPAI SPVYFTVFL VAQFVLNVV VAVLMKHLEE SNKEAREDAE MDAEIELEMA QGSTAQPPT  
 1901 AQESQGTQPD TPNLLVVRKV SVSRMLSLPN DSYMFRPVAF AAAPHSHLQ EVEMETYTGP VTSAHSPPLE PRASFQVPSA ASSPARVSDP LCALSPPRGT  
 2001 RSLSLRILC RQEAHSESL EGKVDVGGD SIPDYTEPAE NMSTSQASTG APRSPPCSPR PASVTRKHT FGQRCSISRP PTLGDGDEAA ADPADEEVSH  
 2101 ITSSAHPWA TEPHSPEASP TASPVKGTMG SGRDPRRFS VDAQSFLDKP GRPDAQRWS VELDNAGESH ESSEVGRAS ELEPALGSR KKKMSPPCIS  
 2201 TEPTEDEGS SRPPAEGGN TTRRRTPSC EAALHRDCPE PTEGPGTGGD PVAKGERWQ ASCRAEHLTV PNFAFEPLDM GPGGDCFLD SDQSVTPEP  
 2301 VSSLGAIIVL ILETLSMPS GDCPEKEQGL YLTVPQTPLK KPGSTPATPA

B

1 MTEGARAAD VRVPLGAPP GPAALVGASF ESPGAPGREA ERGSELGVSP SESPAERGA ELGADEEQRV PYPALAAATVF FCLGQTTTRP SWCLRLVCNP  
 101 WFEHVSMVI MLNCVTLGMF RPCEDVECGS ERCSILEAFD AFIFAFFAVE MVIKMVALGL FGQKCYLGDV WNRLDFFIVM AGMMEYSLDG HNVLSAISRT  
 201 VRVLRPLRAI NRVPSMRILV TLLDLDLPLML GNVLCCFFV FFIQVIGVQ LWAGLLRNRC FLDSAFVRNN NLTLFLRPPYQ TEEGEENPFI CSSRRDNGMQ  
 301 KCSHIPGRRE LRMPCTLGWE AYTQQAEGV GAARNACINW NQYINVCRSQ DSNPHNGAIN FDNIGYAWIA IFQVITLEGW VDIMYYVMDA HSFYNYFYFI  
 401 LLIIIVGFFM INLCLVVIAT QFSETKQREN QLMREQRARH LSNDSTLASF SEPGSCYEEL LKYVGHIFRK VKRRSLRLYA RWQSRWRKVV DPSAVQCGQF  
 501 GHRQRAGRH TASVHHLVY HHHHHHHHHY FSHGSPRRPG PEPGACDTRL VRAGAPSPSP SPGRGPPDAE SVHSIYHAD HIEGQPERAR VAHAATAA  
 601 SLRLATLGT MNYPTILPSC VSGKGSSTSP GPKGWAGFP PGTGGHGLS LNSPDPYEKI PHVVEHGLC QAPGHLGSLS VPCPLSPQA GTLTCELKSC  
 701 PYCTRALEDP EGELSGESG DSDGRGVYEF TDQVRHGDRW DPTRRPRATD TPGPGGSPQ RRAQQAAPC EPGWGRMLW TFSGLRRIV DSKYFSRGM  
 801 MAILVNTLSM GVEYHEQPEE LTNALISNI VFTSMFALEM LLKLLACGFL GIYRNPYNI DGIIVVISVW EIVGQADGGL SVLRTFRLRL VLRFLPALRR  
 901 LRRLVVLVK TMDNATECT LMLFIFIFIS ILGMHLFGCK FSLKTDGTDT VDRKNFDSL LWAIIVTVFI LTQEDWNVLT YNGMASTSSW AALYFVALMT  
 1001 FGNVLFNLL VAILVEGFQA EGDANRSDTD EDKTSVHFEE DFHKLRELQT TELKMSLAV TPNGHLEGRG SLSPPLIMCT AATPMPTPKS SPFLDAAPSL  
 1101 PDSRRGSSSS GDDPLDQKP PASLRSSPCA EWGPGSAWSS RRSWSSLGR APSLKRRCQV GERESLSGE GKSTDDDEAE DGRAAPGPPA TPLRRAESLD  
 1201 PRPLRPAALP PTKCRDRDGO VVALPSDFFI RIDSHREDAE ELDDSDSDC CLRHLKVLEP YKQWCRSRE AWALYLFSPQ NRRFVSCQKV ITHKMFHDVV  
 1301 LVFIFLNCVT IALERPDIDP GSTERVFLSV SNYIFTAIFV AEMMKVVAL GLLSGEHAYL QSSWNLDDGL LVLVSLVDI VAMASAGGAK ILGVLRLRL  
 1401 LRTLRLRVI SRAPGLKLV ETLISSLRPI GNIVLICCAF FIIIFGILGV QLFKGFYYC GPDRNISTK AQCRAAHYR VRRKYNFDNL GQALMSLFLV  
 1501 SSKDGWVNI YDGLDAVGD QQPQVQHNH MLLYFISFL IVSFFVLMN FVGVVVENFH KCRQHQAEEA RRREEKRLR LERRRRTFF SPEAQRPPY  
 1601 ADYSPTRRSI HSLCTSHYLD LFITFIICVN VITMSMEHYN QPKSLDEALK YCNVFTIVF VFEAALKVA FGFRFFKDR WNQLDLAIVL LSLMGITLEE  
 1701 IEMSAALPIN PTIIRIMRVL RIARVLLK MATGMRALD TVVQALPQV NLGLLMLL FIIYALGVEL FGRLECEDN PCEGLSRHAT FSNFGMAFLT  
 1801 LFRVSTGDNW NGIMKDTLRE CSREKHLCS YLPALSPVYF VTFVLAQV LNVVVAVLM KHLEESNKEA REDAELDAE ELEMAGPGS ARRVDADRP  
 1901 LPQESPGARD APNLVARKVS VSRMLSLPND SYMFRPVVA SAPHPRPQE VEMETYGAGT PLGVSASVHS PPAESCASLQ IPLAVSSPAR SGEPLHALSP  
 2001 RGTARSPSL RLLCRQEAHV TDSLEGRIDS PRDLDPAEP GEKTPVRPVT QGGSLQSPPR SPRPASVTR KHTFGQRCVS SRPAAPGGEE AEASDPADEE  
 2101 VSHITSSACP WQPTAEPHP EASPVAGGER DLRLYSVDA QGFLDKPGR DEQWRPSAE GSGEPGEAKA WGPEAPALG ARKKKMSPP CISVEPPAD  
 2201 EGSARPSAE GGSTLRRRT PSCEATPHRD SLEPTEGSGA GGDPAKGER WQASCRAEH LTVPSFAFEP LDGVPSPGDP FLDGSHSVTP ESRASSGAI  
 2301 VPLEPPESEF PMPVGDPEK RRGYLLTVQP CPLEKPGSPS ATPAPGGAD DFV

Fig. S1. Liquid chromatography–MS/MS sequence coverage of the Cav3.2 protein. (A) The amino acid sequence of the canonical rat Cav3.2 isoform (Swiss-Prot G3V9C6) immunopurified from rat brain. (B) The amino acid sequence of the canonical human Cav3.2 isoform (Swiss-Prot O95180) immunopurified from HEK293T cells. Peptide coverage obtained is highlighted in yellow. Underlined sequences represent the proposed large intracellular loops.



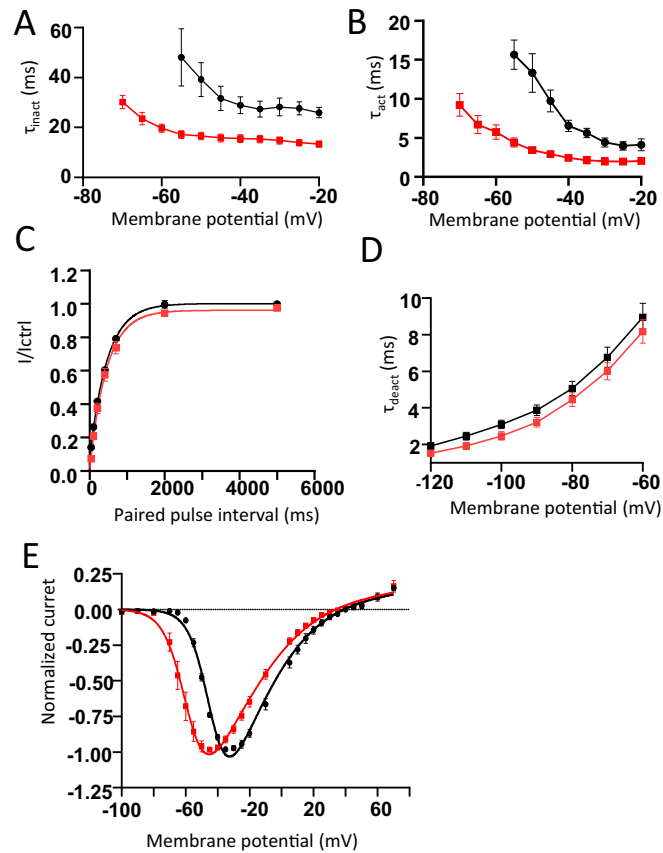

**Fig. S3.** AP effect on the biophysical properties of Cav3.2 channels. HEK293T cells expressing human Cav3.2 were treated with AP by adding AP into the patch pipette (100 U/mL) and letting it dialyze into the cell for 30 min. (A) Inactivation time constants from traces shown in Fig. 2C. (B) Activation time constants of activation from traces shown in Fig. 2C. (C) Recovery from inactivation: recordings were done using two 100-ms test pulses at  $-30$  mV (holding potential was  $-110$  mV) separated by increasing interpulse durations. (D) Deactivation kinetics: after a 7-ms test pulse at  $-30$  mV (holding potential was  $-110$  mV), tail currents were measured at different membrane potentials ( $-120$ ,  $-110$ ,  $-100$ ,  $-90$ ,  $-80$ ,  $-70$ , and  $-60$  mV) and fitted with a monoexponential function. (E) I-V curves: the currents were elicited from a holding potential of  $-100$  mV to different test pulse potentials ( $-100$ ,  $-90$ ,  $-80$ ,  $-70$ ,  $-65$ ,  $-60$ ,  $-55$ ,  $-50$ ,  $-45$ ,  $-40$ ,  $-35$ ,  $-30$ ,  $-25$ ,  $-20$ ,  $-10$ ,  $5$ ,  $10$ ,  $15$ ,  $20$ ,  $25$ ,  $30$ ,  $35$ ,  $40$ ,  $45$ ,  $50$ ,  $60$ , and  $70$  mV). The reversal potential was  $39.78 \pm 2.73$  mV for the non-AP-treated cells and  $34.2 \pm 1.91$  mV for AP-treated cells (Student's  $t$  test;  $P > 0.1$ ; nonsignificant). The non-AP-treated cells are represented with black circles ( $n = 3-5$ ), and the AP-treated cells are represented with red squares ( $n = 4-11$ ).



**Table S1. Summary and comparison of the phosphorylation sites identified in vivo (rat brain) and in vitro (human Cav3.2 expressed in HEK293T cells)**

| In vivo (brain tissue): Rat Isoform |                                                         | In vitro (HEK293T): Human isoform |                               | Remark                     |
|-------------------------------------|---------------------------------------------------------|-----------------------------------|-------------------------------|----------------------------|
| Phosphosite(s)                      | Peptide sequence                                        | Phosphosite(s)                    | Peptide sequence              |                            |
| S18-p*                              | VPLGAsPPAPAAPVR(41)                                     | P18                               | VPLGAPPPGPAALVG               | Not conserved in human     |
| S29-p*                              | VPLGASPPAPAAPVRAsPASPGAPGR(23)                          | S29-p*                            | VGAsPESPGAPGR(22)             |                            |
| S32-p*                              | VPLGASPPAPAAPVRAsPAsPGAPGR(23)                          | S32-p*                            | VGASPEsPGAPGR(46)             |                            |
| L49                                 | GSGSGVLAPESPGTEC                                        | S49-p*                            | GSELGVsPSESAAAER(62)          | Not conserved in rat       |
| P51                                 | GSGSGVLAPESPGTEC                                        | S51-p + S53-p (diP)*              | GSELGVSPsEsPAAER(43)          | Not conserved in rat       |
| S53                                 | GSGSGVLAPESPGTEC                                        | S53-p*                            | GSELGVSPEsPAAER(72)           | Noncovered region in rat   |
| S442-p*                             | YLsNDSTLASFSEPGSCYEELLK(55)                             | S442/S445/T446-p*                 | ARHLsNDstLASFSEPGSCYEELLK(49) |                            |
| S445/T446-p*                        | YLSNDstLASFSEPGSCYEELLK(55)                             | S442/S445/T446-p*                 | ARHLsNDstLASFSEPGSCYEELLK(49) | S445 (1); T446 (2)         |
| S442-p and S445/T446-p (diP)*       | YLsNDstLASFSEPGSCYEELLK(23)                             | S442/S445/T446-p*                 | ARHLsNDstLASFSEPGSCYEELLK(49) |                            |
| S533-p*                             | sHGGPRRSPPEPGAGDNRL(22)                                 | S532/S535-p*                      | sHGSPRRPGPEPGACDTRL(21)       |                            |
| S541-p*                             | SHGGPRRPsPEPGAGDNRL(37)                                 | E542                              | sHGSPRRPGPEPGACDTRL           | Not conserved in human (3) |
| S559/S562-p*                        | ACAPPsPPsPGHGGPPDESvHSIYHADCHVEGPQER(19)                | S558-p + S561-p (diP)*            | AGAPPsPPsPGR(21)              |                            |
| S601-p*                             | VAHSIATAAsLK(28)                                        | S601                              | VAHAAATAAAsLR                 |                            |
| S647-p + S650-p + S653-p (triP)*    | GAGAPGAAVHsPLsLGSPrPYEK(34)                             | S650/S653-p*                      | WAGGPPGTGGHGPLsLNsP-DPYEK(25) |                            |
| S687-p*                             | ASSHLSGLSVPCPLPsPQAGTLTCELK(57)                         | S687-p*                           | SVPCPLPsPPAGTL(20)            |                            |
| S715                                | ALEDPEFEFSG                                             | S715-p*                           | ALEDPEGELsG(43)               | Noncovered region in rat   |
| S715, S717                          | ALEDPEFEFSGESGSDSAH                                     | S715-p+S717-p (diP)*              | ALEDPEGELsGsESGSDSDGR(69)     | Noncovered region in rat   |
| T751-p*                             | HGDCRPVQQPHEVGtPGHSNE(40)                               | T749/T751+S758 (diP)*             | AtDtPGPGPGsPQR(33)            |                            |
| S755-p*                             | HGDCRPVQQPHEVGTPGHsNER(40)                              | T749/T751+S758 (diP)*             | AtDtPGPGPGsPQR(33)            |                            |
| T751-p+S755-p (diP)*                | HGDCRPVQQPHEVGtPGHsNER(19)                              | T749/T751+S758 (diP)*             | AtDtPGPGPGsPQR(33)            |                            |
| S767-p*                             | KAsQPGGIGHLWASFSGK(40)                                  | G770                              | APGEPGWMGRLVWVTFSGK           | Not conserved in human     |
| T1031/S1032/T1033-p*                | SDTDEDKtstQLEGDFDKLR(65)                                | T1034/S1035-p*                    | SDTDEDKtsVHFEEFDHFK(27)       |                            |
| T1058                               | AVTPNGHLEGR                                             | T1061-p*                          | AVtPNGHLEGR(16)               |                            |
| S1068                               | GSLPPLITHAATPMPTPK                                      | S1071-p*                          | GsLSPPLIMCTAATPMPTPK(35)      |                            |
| P1070                               | GSLPPLITHAATPMPTPK                                      | S1073-p*                          | GSLsPPLIMCTAATPMPTPK(56)      |                            |
| S1087/S1088-p*                      | ssPNLDVAHALLDSR(34)                                     | S1090/S1091-p*                    | ssPFLDAAPSLPDSR(42)           |                            |
| A1096                               | SSPNLDVAHALLDSR                                         | S1099-p*                          | SSPFLDAAPsLPDSR(38)           |                            |
| S1100                               | LDVAHALLDSR                                             | S1103-p*                          | LDAAPSLPDSR(56)               |                            |
| S1104-p*                            | RSsSGSVDPLGDQK(73)                                      | S1107-p*                          | RGsSSSGDPLGDQKPPASLR(66)      | 5                          |
| S1124                               | RSSPCTPW                                                | S1127-p*                          | RSsPCAPW(21)                  |                            |
| S1144-p*                            | SSWNsLGR(34)                                            | S1144-p*                          | RSsWSSLGR(44)                 |                            |
| S1171-p + T1172-p (diP)*            | SQCGERESLLSGEGKStDDEAEDSRPST-GTHPGASPGPR(36)            | S1174-p+S1175-p (diP)*            | ESLLSGEGKStDDEAEDGR(21)       |                            |
| S1203-p*                            | RRAEsLDHRSTL(23)                                        | S1198-p*                          | RRAEsLDPRPL(34)               | 6                          |
| I1257                               | EDAAEFDDIEDSCCFR                                        | S1246-p*                          | EDAAELDDsEDSCLLR(80)          |                            |
| —                                   | —                                                       | S1587-p*                          | RRsTFPSPEAQR(47)              |                            |
| —                                   | —                                                       | T1588-p*                          | RStFPSPEAQR(26)               |                            |
| —                                   | —                                                       | S1591-p*                          | STFPsPEAQR(37)                |                            |
| —                                   | —                                                       | S1905-p*                          | RVDADRPPLPQEsPGAR(41)         |                            |
| S1927-p*                            | MLsLPNDSYMFR(45)                                        | S1926-p*                          | MLsLPNDSYMFR(61)              |                            |
| S1966-p*                            | TGPVTSAHsPPLEPR(43)                                     | S1970-p*                          | GSVASVHsPPAESCASL(60)         |                            |
| S1983-p*                            | ASFQVPSAAsPAR(53)                                       | S1987-p*                          | AVsPARSGEPL(42)               |                            |
| S1995-p*                            | VSDPLCALsPR(66)                                         | S1999-p*                          | SGEPLHALsPR(31)               |                            |
| S2054-p*                            | sPPCSPRPASVR(17)                                        | S2057-p*                          | TPVRPVTTGGSLQsPPR(62)         |                            |
| S2119-p*                            | CISSRPPTLGGDEAAADPADEEVSHITS-SAHWPATEPHSPEAsPTASPVK(24) | S2123-p*                          | QPTAEPHGPEAsPVAGGE(36)        |                            |
| S2140-p*                            | FcsVDAQSFLDKPGRPDAQR(64)                                | S2137                             | LYSVDAQGFLDKPGRADQW           |                            |

**Table S1. Cont.**

| In vivo (brain tissue): Rat Isoform |                                     | In vitro (HEK293T): Human isoform |                                          | Remark                        |
|-------------------------------------|-------------------------------------|-----------------------------------|------------------------------------------|-------------------------------|
| Phosphosite(s)                      | Peptide sequence                    | Phosphosite(s)                    | Peptide sequence                         |                               |
| S2159/S2160-p*                      | W <u>ss</u> VELDNGESHLESGEVR(82)    | S2156                             | WRPSAELGSGEPGEAK                         | 1, 7                          |
| S2195-p*                            | KMsPPCISIEPTEDEGSSRPPAAEGGNTTLR(57) | S2188-p*                          | KMsPPCISVEPPAEDEGSARPSA-AEGGSTTLR(58)    |                               |
| S2200-p*                            | KMSPPCIsIEPTEDEGSSRPPAAEGGNTTLR(38) | S2193-p*                          | KMSPPCIsVEPPAEDEGSARPSA-AEGGSTTLR(27)    |                               |
| T2227/S2229                         | TPSCEAALHRDCPEPTGPGTGGDPVAK         | T2220/S2222-p*                    | <u>t</u> PsCEATPHRDSLEPTGSGAGG-DPAAK(31) |                               |
| C2238                               | RTPSCEAALHRDCPEPTGPGTGGDPVAK        | S2231-p*                          | RTPSCEATPHRDSLEPTGSGAG-GDPAAK(26)        | Not conserved in rat          |
| S2354-p*                            | KPGSTPATPAPDDsGDEPV(55)             | G2348                             | KPGSPSATPAPGGGADDPV                      | Not conserved in human (1, 3) |

For the ambiguous sites, the serine or threonine is underlined. The peptide sequence corresponds to the peptide on which the serine/threonine residues were found phosphorylated by MS. The mascot identification score is given in parentheses after each peptide. Except for the peptides marked with diphosphorylated peptide (diP) or triphosphorylated peptide (triP), all of the peptides were monophosphorylated. When the phosphorylated serine/threonine residue in the rat isoform has no correspondence to a phosphorylated serine/threonine residue in the human isoform or vice versa, the corresponding amino acid and amino acid sequences are given.

\*The identified phosphosites are indicated with -p in the Phosphosite columns and lowercase letters in the Peptide sequence columns.

- Huttlin EL, et al. (2010) A tissue-specific atlas of mouse protein phosphorylation and expression. *Cell* 143(7):1174–1189.
- (2007) CST Curation Set: 3170; Year: 2007; Biosample/Treatment: Cell Line, Jurkat/Pervanadate & Calyculin; Disease: T cell Leukemia; SILAC: -; Specificity of Antibody Used to Purify Peptides Prior to MS2: Anti-pTyr Antibody Used to Purify Peptides Prior to MS2: Phospho-Tyrosine Mouse mAb (P-Tyr-100) Cat#: 9411, PTMScan(R) Phospho-Tyr Motif (Y\*) Immunoaffinity Beads Cat#: 1991. Available at [www.phosphosite.org](http://www.phosphosite.org).
- Trinidad JC, et al. (2012) Global identification and characterization of both O-GlcNAcylation and phosphorylation at the murine synapse. *Mol Cell Proteomics* 11(8):215–229.
- (2008) CST Curation Set: 5418; Year: 2008; Biosample/Treatment: Cell Line, EGI-1/Untreated; Disease: Bile-Duct Cancer; SILAC: -; Specificity of Antibody Used to Purify Peptides Prior to MS2: Anti-pTyr Antibody Used to Purify Peptides Prior to MS2: Phospho-Tyrosine Mouse mAb (P-Tyr-100) Cat#: 9411, PTMScan(R) Phospho-Tyr Motif (Y\*) Immunoaffinity Beads Cat#: 1991. Available at [www.phosphosite.org](http://www.phosphosite.org).
- Hu C, Depuy SD, Yao J, McIntire WE, Barrett PQ (2009) Protein kinase A activity controls the regulation of T-type CaV3.2 channels by Gbetagamma dimers. *J Biol Chem* 284(12):7465–7473.
- Yao J, et al. (2006) Molecular basis for the modulation of native T-type Ca<sup>2+</sup> channels in vivo by Ca<sup>2+</sup>/calmodulin-dependent protein kinase II. *J Clin Invest* 116(9):2403–2412.
- (2007) CST Curation Set: 2262; Year: 2007; Biosample/Treatment: Cell Line, M059K/UV; Disease: Glioblastoma; SILAC: -; Specificity of Antibody Used to Purify Peptides Prior to MS2: Anti-(s/t)Q(phosphorylation) Antibody Used to Purify Peptides Prior to MS2: Phospho-(Ser/Thr) ATMIATR Substrate Antibody Cat#: 2851. Available at [www.phosphosite.org](http://www.phosphosite.org).

## Other Supporting Information Files

[Dataset S1 \(PDF\)](#)
