# Supplementary material
Source: PubMed Central journal article supplement (PMC4640759)
Supplement: pnas.1511740112.sd01.pdf [file pnas.1511740112.sd01.pdf]

# MS/MS spectra

MS/MS spectra of  
phosphorylated  
peptides in rat cav3.2  
(brain)

**S18**

# ProPhosSI MS/MS report

Mass: 740.389086 Charge: 2+

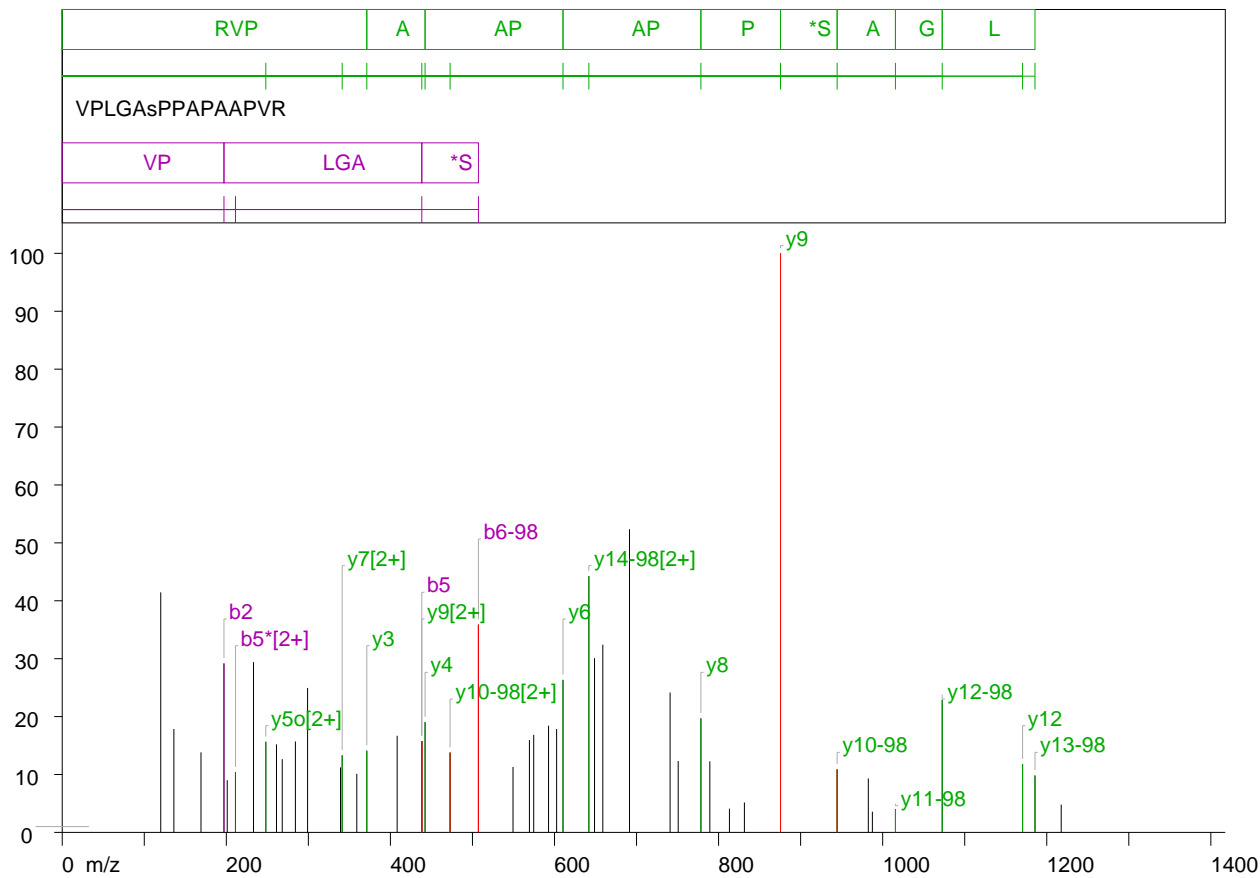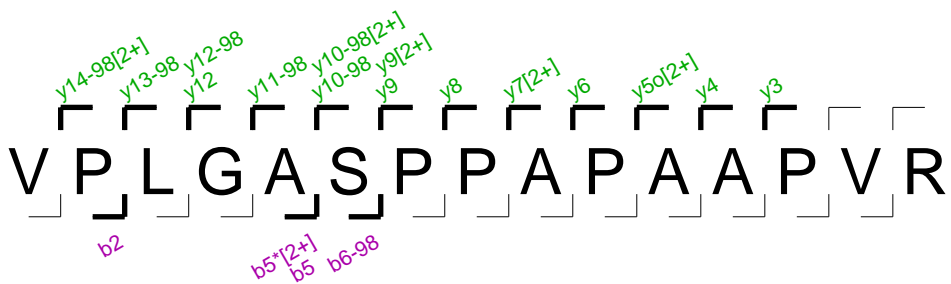

## Cav3.2 Rat

(41) 13 VPLGAsPPAPAAPVR 27 1478.764 (-0.0021) Da

|                         |     |
|-------------------------|-----|
| Parent Ion              | m/z |
| No parent ions observed |     |

### Modifications and supporting evidence

| Position | Residue ID | Modification | Evidence                   |
|----------|------------|--------------|----------------------------|
| 6        | (18)       | Phospho (ST) | b5 => b6-98 : y9 => y10-98 |

### Spectrum interpretation

| Rule                                   | passed/tests | Description                                                                                                                                                                                                                                                                                                                                                                                                                                                                                                                                                                                                                                                                                                                                       |
|----------------------------------------|--------------|---------------------------------------------------------------------------------------------------------------------------------------------------------------------------------------------------------------------------------------------------------------------------------------------------------------------------------------------------------------------------------------------------------------------------------------------------------------------------------------------------------------------------------------------------------------------------------------------------------------------------------------------------------------------------------------------------------------------------------------------------|
| Parent ions present                    | 0/1          | Parent ions corresponding to the parent fragment - 1 phosphate ions were not found                                                                                                                                                                                                                                                                                                                                                                                                                                                                                                                                                                                                                                                                |
| Three -98 Ions present                 | 1/1          | 6 des-phospho fragment ions were found.                                                                                                                                                                                                                                                                                                                                                                                                                                                                                                                                                                                                                                                                                                           |
| Unique -98 transitions present         | 1/1          | transition b5 to b6-98, transition y9 to y10-98 support unique phosphorylation at position 6<br><br/>                                                                                                                                                                                                                                                                                                                                                                                                                                                                                                                                                                                                                                             |
| Four Sequential b or y ions            | 1/1          | Sequence of four y ions found from y6 to y9.                                                                                                                                                                                                                                                                                                                                                                                                                                                                                                                                                                                                                                                                                                      |
| Five of six sequential ions present    | 1/1          | Five of Six ions found between y3 and y8<br>Five of Six ions found between y4 and y9<br>Five of Six ions found between y5 and y10<br>Five of Six ions found between y6 and y11<br>Five of Six ions found between y7 and y12<br>Five of Six ions found between y8 and y13<br>Five of Six ions found between y9 and y14<br>Five of Six ions found between y10 and y15                                                                                                                                                                                                                                                                                                                                                                               |
| Proline directed fragmentation pattern | 6/7          | PASS: y14-98> y13-98 with ratio 4.50<br/><br>FAIL: b2> b1<br/>NOTE: S-P is a low abundance fragmentation.<br>PASS: y9> y8 with ratio 5.07<br/><br>PASS: b7-98< b6-98<br/><br>NOTE: P-P is a low abundance fragmentation.<br>PASS: y8> y7 with ratio 1.48<br/><br>No proline ions at b8-98<br/><br>PASS: y6> y5<br/><br>No proline ions at b10-98<br/><br>PASS: y3> y2<br/><br>No proline ions at b13-98<br/>                                                                                                                                                                                                                                                                                                                                      |
| PhosphoTyrosine transition present     | 0/0          | 0 of 0 phosphotyrosine transitions were found.                                                                                                                                                                                                                                                                                                                                                                                                                                                                                                                                                                                                                                                                                                    |
| Six of top ten ions identified         | 5/6          | ion 1 (mass: 875.5004661: intensity: 62122.6171875) assigned 1 times<br>ion 2 (mass: 691.4057587: intensity: 32528.095703125) assigned 0 times<br>ion 3 (mass: 641.8702343: intensity: 27487.3515625) assigned 1 times<br>ion 4 (mass: 120.0811884: intensity: 25752.666015625) assigned 0 times<br>ion 5 (mass: 507.2983345: intensity: 22283.52734375) assigned 1 times<br>ion 6 (mass: 658.8970939: intensity: 20143.84375) assigned 0 times<br>ion 7 (mass: 648.8113496: intensity: 18689.689453125) assigned 0 times<br>ion 8 (mass: 233.165799: intensity: 18262.75390625) assigned 0 times<br>ion 9 (mass: 197.1286292: intensity: 18127.21875) assigned 2 times<br>ion 10 (mass: 610.3689763: intensity: 16366.58984375) assigned 1 times |

## Ion Table

19 ions assigned of 46 ions above threshold (41%).

### N-terminal ions

| AA | N-ion | b                            | b*                               | b-98                        | bo       |
|----|-------|------------------------------|----------------------------------|-----------------------------|----------|
| V  | 1     | 100.076                      | 83.049                           | -                           | 82.065   |
| P  | 2     | 197.129<br>*197.1286292 (29) | 180.102                          | -                           | 179.118  |
| L  | 3     | 310.213                      | 293.186                          | -                           | 292.202  |
| G  | 4     | 367.234                      | 350.208                          | -                           | 349.223  |
| A  | 5     | 438.271<br>*438.2611016 (15) | 421.245<br>211.1435126 [2+] (10) | -                           | 420.261  |
| s  | 6     | 605.270                      | 588.243                          | 507.284<br>507.2983345 (35) | 587.259  |
| P  | 7     | 702.322                      | 685.296                          | 604.336                     | 684.312  |
| P  | 8     | 799.375                      | 782.349                          | 701.389                     | 781.364  |
| A  | 9     | 870.412                      | 853.386                          | 772.426                     | 852.402  |
| P  | 10    | 967.465                      | 950.438                          | 869.479                     | 949.454  |
| A  | 11    | 1038.502                     | 1021.476                         | 940.516                     | 1020.491 |
| A  | 12    | 1109.539                     | 1092.513                         | 1011.553                    | 1091.529 |
| P  | 13    | 1206.592                     | 1189.565                         | 1108.606                    | 1188.581 |
| V  | 14    | 1305.660                     | 1288.634                         | 1207.674                    | 1287.650 |
| R  | 15    | -                            | -                                | -                           | -        |

### C-terminal ions

| AA | C-ion | y                                                      | y*       | y-98                                                 | yo                               |
|----|-------|--------------------------------------------------------|----------|------------------------------------------------------|----------------------------------|
| V  | 15    | -                                                      | -        | -                                                    | -                                |
| P  | 14    | 1380.704                                               | 1363.677 | 1282.718<br>641.8702343 [2+] (44)                    | 1362.693                         |
| L  | 13    | 1283.651                                               | 1266.624 | 1185.665<br>1185.674514 (9)                          | 1265.640                         |
| G  | 12    | 1170.567<br>1170.5635 (11)                             | 1153.540 | 1072.581<br>1072.581516 (22)                         | 1152.556                         |
| A  | 11    | 1113.545                                               | 1096.519 | 1015.559<br>1015.574351 (4)                          | 1095.535                         |
| s  | 10    | 1042.508                                               | 1025.482 | 944.522<br>944.5124988 (10)<br>472.7742146 [2+] (13) | 1024.498                         |
| P  | 9     | 875.510<br>875.5004661 (100)<br>*438.2611016 [2+] (15) | 858.483  | -                                                    | 857.499                          |
| P  | 8     | 778.457<br>778.4585997 (19)                            | 761.431  | -                                                    | 760.447                          |
| A  | 7     | 681.404<br>341.2199303 [2+] (13)                       | 664.378  | -                                                    | 663.394                          |
| P  | 6     | 610.367<br>610.3689763 (26)                            | 593.341  | -                                                    | 592.357                          |
| A  | 5     | 513.314                                                | 496.288  | -                                                    | 495.304<br>248.1598059 [2+] (15) |
| A  | 4     | 442.277<br>442.2774596 (19)                            | 425.251  | -                                                    | 424.267                          |
| P  | 3     | 371.240<br>371.2399156 (14)                            | 354.214  | -                                                    | 353.230                          |
| V  | 2     | 274.187                                                | 257.161  | -                                                    | 256.177                          |
| R  | 1     | 175.119                                                | 158.092  | -                                                    | 157.108                          |

### Ion distribution

| Threshold | Ion count | Matches | % matched |
|-----------|-----------|---------|-----------|
| 0         | 46        | 19      | 41        |
| 0.5       | 46        | 19      | 41        |
| 1         | 46        | 19      | 41        |
| 2         | 46        | 19      | 41        |
| 3         | 46        | 19      | 41        |
| 4         | 45        | 19      | 42        |
| 5         | 42        | 18      | 42        |
| 10        | 38        | 17      | 44        |

### Observed ions > 1%

| m/z         | Intensity         | % max | Assignment (delta)           |
|-------------|-------------------|-------|------------------------------|
| 120.0811884 | 25752.666015625,  | 41.45 |                              |
| 136.0762578 | 11093.0107421875, | 17.85 |                              |
| 169.1347392 | 8590.33984375,    | 13.82 | a2 (0.00)                    |
| 197.1286292 | 18127.21875,      | 29.17 | b2 (-0.00) : a5*[2+] (-0.00) |
| 201.1232249 | 5594.9008789063,  | 9.00  |                              |
| 211.1435126 | 6451.3168945313,  | 10.38 | b5*[2+] (0.01)               |
| 233.165799  | 18262.75390625,   | 29.39 |                              |
| 248.1598059 | 9721.109375,      | 15.64 | y5o[2+] (0.00)               |
| 261.1599771 | 9445.4921875,     | 15.20 |                              |
| 268.1634305 | 7854.0751953125,  | 12.64 |                              |
| 284.1978554 | 9755.2666015625,  | 15.70 |                              |
| 299.0608804 | 15498.74609375,   | 24.94 |                              |
| 339.2022919 | 6978.8383789063,  | 11.23 |                              |
| 341.2199303 | 8264.478515625,   | 13.30 | y7[2+] (0.01)                |
| 359.0276304 | 6281.46875,       | 10.11 |                              |
| 371.2399156 | 8769.1171875,     | 14.11 | y3 (-0.00)                   |
| 408.2265202 | 10368.748046875,  | 16.69 |                              |
| 438.2611016 | 9797.49609375,    | 15.77 | y9[2+] (0.00) : b5 (-0.01)   |
| 442.2774596 | 11829.3369140625, | 19.04 | y4 (-0.00)                   |
| 472.7742146 | 8564.607421875,   | 13.78 | y10-98[2+] (0.00)            |
| 507.2983345 | 22283.52734375,   | 35.87 | b6-98 (0.01)                 |
| 549.4394365 | 7020.1982421875,  | 11.30 |                              |
| 569.452263  | 9903.9033203125,  | 15.94 |                              |
| 574.681702  | 10468.7734375,    | 16.85 |                              |
| 592.7517013 | 11451.5283203125, | 18.43 |                              |
| 602.6048664 | 11087.958984375,  | 17.84 |                              |
| 610.3689763 | 16366.58984375,   | 26.34 | y6 (0.00)                    |
| 641.8702343 | 27487.3515625,    | 44.24 | y14-98[2+] (0.00)            |
| 648.8113496 | 18689.689453125,  | 30.08 |                              |
| 658.8970939 | 20143.84375,      | 32.42 |                              |

|             |                  |       |                |
|-------------|------------------|-------|----------------|
| 691.4057587 | 32528.095703125, | 52.36 |                |
| 740.9079715 | 15009.705078125, | 24.16 |                |
| 750.778943  | 7653.2421875,    | 12.31 |                |
| 778.4585997 | 12239.376953125, | 19.70 | y8 (0.00)      |
| 789.35457   | 7627.2739257813, | 12.27 |                |
| 813.231229  | 2544.5498046875, | 4.09  |                |
| 831.4588218 | 3214.435546875,  | 5.17  |                |
| 875.5004661 | 62122.6171875,   | 100   | y9 (-0.00)     |
| 944.5124988 | 6761.0180664063, | 10.88 | y10-98 (-0.01) |
| 982.5148384 | 5793.5854492188, | 9.32  |                |
| 987.440579  | 2226.17578125,   | 3.58  |                |
| 1015.574351 | 2494.4206542969, | 4.01  | y11-98 (0.01)  |
| 1072.581516 | 14224.02734375,  | 22.89 | y12-98 (0.00)  |
| 1170.5635   | 7314.1987304688, | 11.77 | y12 (-0.00)    |
| 1185.674514 | 6106.4389648438, | 9.82  | y13-98 (0.00)  |
| 1217.633573 | 2981.9973144531, | 4.80  |                |



S29



## Cav3.2 Rat

(23) 13 VPLGASPPAPAAPVRAsPASPAPGR 38 2427.242 Da

|                         |     |
|-------------------------|-----|
| Parent Ion              | m/z |
| No parent ions observed |     |

### Modifications and supporting evidence

| Position | Residue ID | Modification | Evidence   |
|----------|------------|--------------|------------|
| 17       | (29)       | Phospho (ST) | y8=>y13-98 |

### Spectrum interpretation

| Rule                                   | passed/tests | Description                                                                                                                                                                                                                                                                                                                                                                                                                                                                                                                                                                                                                                                                                                                                            |
|----------------------------------------|--------------|--------------------------------------------------------------------------------------------------------------------------------------------------------------------------------------------------------------------------------------------------------------------------------------------------------------------------------------------------------------------------------------------------------------------------------------------------------------------------------------------------------------------------------------------------------------------------------------------------------------------------------------------------------------------------------------------------------------------------------------------------------|
| Parent ions present                    | 0/1          | Parent ions corresponding to the parent fragment - 1 phosphate ions were not found                                                                                                                                                                                                                                                                                                                                                                                                                                                                                                                                                                                                                                                                     |
| Three -98 Ions present                 | 1/1          | 9 des-phospho fragment ions were found.                                                                                                                                                                                                                                                                                                                                                                                                                                                                                                                                                                                                                                                                                                                |
| Unique -98 transitions present         | 1/1          | transition y8 to y13-98 support unique phosphorylation at position 17<br><br/>                                                                                                                                                                                                                                                                                                                                                                                                                                                                                                                                                                                                                                                                         |
| Four Sequential b or y ions            | 1/1          | Sequence of four b ions found from b3 to b6.                                                                                                                                                                                                                                                                                                                                                                                                                                                                                                                                                                                                                                                                                                           |
| Five of six sequential ions present    | 1/1          | Five of Six ions found between b2 and b7<br>Five of Six ions found between b3 and b8<br>Five of Six ions found between b4 and b9<br>Five of Six ions found between y19 and y24<br>Five of Six ions found between y20 and y25                                                                                                                                                                                                                                                                                                                                                                                                                                                                                                                           |
| Proline directed fragmentation pattern | 8/11         | FAIL: y25-98< y24-98<br/>No proline ions at b2<br/><br>NOTE: S-P is a low abundance fragmentation.<br>PASS: y20-98> y19-98 with ratio 20.8<br/><br>PASS: b7< b6 with ratio 8.35<br/><br>NOTE: P-P is a low abundance fragmentation.<br>PASS: y19-98> y18-98<br/><br>PASS: b8< b7<br/><br>PASS: y17-98> y16-98<br/><br>PASS: b10< b9<br/><br>FAIL: y14-98< y13-98<br/>No proline ions at b13<br/><br>NOTE: S-P is a low abundance fragmentation.<br>FAIL: y9< y8<br/>No proline ions at b18-98<br/><br>NOTE: S-P is a low abundance fragmentation.<br>PASS: y6> y5<br/><br>No proline ions at b21-98<br/><br>PASS: y3> y2<br/><br>No proline ions at b24-98<br/>                                                                                        |
| PhosphoTyrosine transition present     | 0/0          | 0 of 0 phosphotyrosine transitions were found.                                                                                                                                                                                                                                                                                                                                                                                                                                                                                                                                                                                                                                                                                                         |
| Six of top ten ions identified         | 8/6          | ion 1 (mass: 952.7352295: intensity: 23419.04296875) assigned 1 times<br>ion 2 (mass: 903.7352295: intensity: 13923.27734375) assigned 2 times<br>ion 3 (mass: 635.6049805: intensity: 7219.5546875) assigned 0 times<br>ion 4 (mass: 996.2458496: intensity: 6968.00390625) assigned 1 times<br>ion 5 (mass: 953.6113281: intensity: 6837.4541015625) assigned 0 times<br>ion 6 (mass: 904.5695801: intensity: 6080.0546875) assigned 1 times<br>ion 7 (mass: 790.5495605: intensity: 5031.9091796875) assigned 1 times<br>ion 8 (mass: 744.7149658: intensity: 3943.1440429688) assigned 1 times<br>ion 9 (mass: 947.190918: intensity: 3759.1779785156) assigned 1 times<br>ion 10 (mass: 525.4376831: intensity: 3489.5012207031) assigned 1 times |

## Ion Table

63 ions assigned of 90 ions above threshold (70%).

### N-terminal ions

| AA | N-ion | b                                                         | b*                                                   | b-98     | bo                                                          |
|----|-------|-----------------------------------------------------------|------------------------------------------------------|----------|-------------------------------------------------------------|
| V  | 1     | 100.076                                                   | 83.049                                               | -        | 82.065                                                      |
| P  | 2     | 197.129                                                   | 180.102                                              | -        | 179.118                                                     |
| L  | 3     | 310.213<br>310.2914734 (1)                                | 293.186                                              | -        | 292.202<br>*292.2433167 (1)                                 |
| G  | 4     | 367.234<br>367.213501 (1)                                 | 350.208                                              | -        | 349.223                                                     |
| A  | 5     | 438.271<br>438.291687 (3)                                 | 421.245                                              | -        | 420.261                                                     |
| S  | 6     | 525.303<br>525.4376831 (14)                               | 508.277<br>508.3764648 (3)                           | -        | 507.293<br>*507.3612061 (9)                                 |
| P  | 7     | 622.356<br>*311.2166138 [2+] (1)<br>*312.1858521 [2+] (1) | 605.329                                              | -        | 604.345<br>*604.213623 (2)                                  |
| P  | 8     | 719.409                                                   | 702.382                                              | -        | 701.398<br>701.1758423 (2)                                  |
| A  | 9     | 790.446<br>790.5495605 (21)                               | 773.419                                              | -        | 772.435                                                     |
| P  | 10    | 887.499                                                   | 870.472<br>436.2650757 [2+] (7)                      | -        | 869.488                                                     |
| A  | 11    | 958.536<br>*479.335968 [2+] (1)                           | 941.509                                              | -        | 940.525                                                     |
| A  | 12    | 1029.573                                                  | 1012.546<br>*1012.06189 (5)<br>*507.3612061 [2+] (9) | -        | 1011.562<br>*1011.223389 (10)<br>*1012.06189 (5)            |
| P  | 13    | 1126.626                                                  | 1109.599<br>*555.3710938 [2+] (3)                    | -        | 1108.615<br>*555.3710938 [2+] (3)<br>*554.3131104 [2+] (11) |
| V  | 14    | 1225.694                                                  | 1208.668                                             | -        | 1207.684<br>*604.213623 [2+] (2)                            |
| R  | 15    | 1381.795<br>*691.8182373 [2+] (4)                         | 1364.769                                             | -        | 1363.785                                                    |
| A  | 16    | 1452.832                                                  | 1435.806                                             | -        | 1434.822                                                    |
| s  | 17    | 1619.831                                                  | 1602.804<br>*801.3063965 [2+] (3)                    | 1521.845 | 1601.820<br>*801.3063965 [2+] (3)                           |
| P  | 18    | 1716.883                                                  | 1699.857                                             | 1618.898 | 1698.873                                                    |
| A  | 19    | 1787.921<br>*894.6916504 [2+] (8)                         | 1770.894                                             | 1689.935 | 1769.910                                                    |
| S  | 20    | 1874.953                                                  | 1857.926                                             | 1776.967 | 1856.942                                                    |
| P  | 21    | 1972.005                                                  | 1954.979                                             | 1874.019 | 1953.995                                                    |
| G  | 22    | 2029.027                                                  | 2012.000                                             | 1931.041 | 2011.016                                                    |
| A  | 23    | 2100.064<br>*1050.728516 [2+] (3)                         | 2083.037                                             | 2002.078 | 2082.053                                                    |
| P  | 24    | 2197.117                                                  | 2180.090                                             | 2099.131 | 2179.106                                                    |
| G  | 25    | 2254.138                                                  | 2237.112                                             | 2156.152 | 2236.128                                                    |
| R  | 26    | -                                                         | -                                                    | -        | -                                                           |

### C-terminal ions

| AA | C-ion | y        | y*       | y-98                              | yo       |
|----|-------|----------|----------|-----------------------------------|----------|
| V  | 26    | -        | -        | -                                 | -        |
| P  | 25    | 2329.181 | 2312.155 | 2231.196<br>*1116.449951 [2+] (6) | 2311.171 |
| L  | 24    | 2232.129 | 2215.102 | 2134.143                          | 2214.118 |

|   |    |                                    |                                    |                                    |                                                            |
|---|----|------------------------------------|------------------------------------|------------------------------------|------------------------------------------------------------|
| - | -  | *1116.449951 [2+] (6)              | *1107.873291 [2+] (2)              | 1067.805054 [2+] (8)               | *1107.873291 [2+] (2)                                      |
| G | 23 | 2119.045<br>1059.937866 [2+] (7)   | 2102.018                           | 2021.059<br>*1011.223389 [2+] (10) | 2101.034<br>*1050.728516 [2+] (3)                          |
| A | 22 | 2062.023<br>1031.693726 [2+] (7)   | 2044.997                           | 1964.037                           | 2044.013                                                   |
| S | 21 | 1990.986<br>996.2458496 [2+] (29)  | 1973.959<br>*987.7427979 [2+] (5)  | 1893.000<br>947.190918 [2+] (16)   | 1972.975                                                   |
| P | 20 | 1903.954<br>952.7352295 [2+] (100) | 1886.927<br>*943.7270508 [2+] (12) | 1805.968<br>*903.7352295 [2+] (59) | 1885.943<br>*943.7270508 [2+] (12)                         |
| P | 19 | 1806.901<br>*903.7352295 [2+] (59) | 1789.875<br>*895.5144043 [2+] (4)  | 1708.915<br>854.755249 [2+] (2)    | 1788.891<br>*894.6916504 [2+] (8)<br>*895.5144043 [2+] (4) |
| A | 18 | 1709.848<br>855.5913086 [2+] (12)  | 1692.822<br>*846.6206055 [2+] (2)  | 1611.863                           | 1691.838<br>*846.6206055 [2+] (2)                          |
| P | 17 | 1638.811<br>820.3164063 [2+] (5)   | 1621.785                           | 1540.825<br>*771.2575684 [2+] (5)  | 1620.801                                                   |
| A | 16 | 1541.759<br>*771.2575684 [2+] (5)  | 1524.732                           | 1443.773                           | 1523.748                                                   |
| A | 15 | 1470.721                           | 1453.695                           | 1372.736                           | 1452.711                                                   |
| P | 14 | 1399.684<br>*700.4591064 [2+] (2)  | 1382.658<br>*691.8182373 [2+] (4)  | 1301.698<br>*651.9412231 [2+] (1)  | 1381.674<br>*691.8182373 [2+] (4)                          |
| V | 13 | 1302.632<br>*651.9412231 [2+] (1)  | 1285.605                           | 1204.646<br>603.0700073 [2+] (10)  | 1284.621                                                   |
| R | 12 | 1203.563                           | 1186.537                           | 1105.577                           | 1185.553                                                   |
| A | 11 | 1047.462                           | 1030.435                           | 949.476                            | 1029.451                                                   |
| s | 10 | 976.425                            | 959.398                            | 878.439                            | 958.414<br>*479.335968 [2+] (1)                            |
| P | 9  | 809.427                            | 792.400<br>*792.5715332 (7)        | -                                  | 791.416<br>791.5098877 (7)                                 |
| A | 8  | 712.374<br>712.2622681 (3)         | 695.347                            | -                                  | 694.363                                                    |
| S | 7  | 641.337<br>641.3455811 (3)         | 624.310<br>*312.1858521 [2+] (1)   | -                                  | 623.326<br>*312.1858521 [2+] (1)                           |
| P | 6  | 554.305<br>*554.3131104 (11)       | 537.278                            | -                                  | 536.294<br>268.203949 [2+] (2)                             |
| G | 5  | 457.252                            | 440.225                            | -                                  | 439.241                                                    |
| A | 4  | 400.230                            | 383.204                            | -                                  | 382.220                                                    |
| P | 3  | 329.193<br>329.3317566 (2)         | 312.167<br>*312.1858521 (1)        | -                                  | 311.183<br>*311.2166138 (1)                                |
| G | 2  | 232.140                            | 215.114                            | -                                  | 214.130                                                    |
| R | 1  | 175.119                            | 158.092                            | -                                  | 157.108                                                    |

## Ion distribution

| Threshold | Ion count | Matches | % matched |
|-----------|-----------|---------|-----------|
| 0         | 132       | 80      | 60        |
| 0.5       | 124       | 74      | 59        |
| 1         | 105       | 68      | 64        |
| 2         | 74        | 53      | 71        |
| 3         | 55        | 41      | 74        |
| 4         | 42        | 32      | 76        |
| 5         | 37        | 28      | 75        |
| 10        | 17        | 14      | 82        |

Observed ions > 1%

| m/z         | Intensity       | % max | Assignment (delta)                                                                         |
|-------------|-----------------|-------|--------------------------------------------------------------------------------------------|
| 266.2089844 | 276.302947998   | 1.17  |                                                                                            |
| 268.203949  | 487.2700805664  | 2.08  | y6o[2+] (-0.44)                                                                            |
| 269.2924805 | 349.4795227051  | 1.49  | y6*[2+] (0.14) : z6[2+] (0.14)                                                             |
| 292.2433167 | 444.5546875     | 1.89  | x6[2+] (0.58) : b3o (0.04)                                                                 |
| 310.2914734 | 410.3699951172  | 1.75  | b3 (0.07)                                                                                  |
| 311.2166138 | 417.7741699219  | 1.78  | y3o (0.03) : b7[2+] (-0.46)                                                                |
| 312.1858521 | 415.9727783203  | 1.77  | b7[2+] (0.50) : y3* (0.01) : z3 (0.01) : y7o[2+] (0.01) : z7[2+] (-0.47) : y7*[2+] (-0.47) |
| 329.3317566 | 634.3988647461  | 2.70  | y3 (0.13)                                                                                  |
| 337.3043823 | 241.9138031006  | 1.03  | a8o[2+] (0.09) : a8*[2+] (-0.39)                                                           |
| 339.3014832 | 1120.9458007813 | 4.78  | a4 (0.06)                                                                                  |
| 365.2946777 | 263.8448486328  | 1.12  |                                                                                            |
| 367.213501  | 416.04296875    | 1.77  | b4 (-0.02)                                                                                 |
| 398.2878418 | 251.7483520508  | 1.07  |                                                                                            |
| 408.2564087 | 393.1322631836  | 1.67  |                                                                                            |
| 409.3639832 | 324.955078125   | 1.38  |                                                                                            |
| 410.3105164 | 683.9563598633  | 2.92  | a5 (0.03)                                                                                  |
| 426.24823   | 707.6258544922  | 3.02  |                                                                                            |
| 427.2878418 | 271.129699707   | 1.15  |                                                                                            |
| 436.2650757 | 1816.3032226563 | 7.75  | b10*[2+] (0.52)                                                                            |
| 438.291687  | 897.6844482422  | 3.83  | b5 (0.02)                                                                                  |
| 463.3316345 | 372.9010009766  | 1.59  |                                                                                            |
| 479.335968  | 429.1842651367  | 1.83  | a6o (0.03) : y10o[2+] (-0.37) : b11[2+] (-0.43)                                            |
| 481.3509827 | 514.9075317383  | 2.19  |                                                                                            |
| 497.3687744 | 860.6733398438  | 3.67  | a6 (0.05)                                                                                  |
| 499.5850525 | 761.9863891602  | 3.25  |                                                                                            |
| 507.3612061 | 2301.4807128906 | 9.82  | b12*[2+] (0.58) : b6o (0.06)                                                               |
| 508.3764648 | 772.1566162109  | 3.29  | b6* (0.09)                                                                                 |
| 525.4376831 | 3489.5012207031 | 14.90 | b6 (0.13)                                                                                  |
| 526.3417358 | 840.4647827148  | 3.58  |                                                                                            |
| 554.3131104 | 2697.4147949219 | 11.51 | y6 (0.00) : b13o[2+] (-0.49)                                                               |
| 555.3710938 | 718.3114013672  | 3.06  | b13o[2+] (0.55) : b13*[2+] (0.06)                                                          |
| 583.6594238 | 275.5367126465  | 1.17  |                                                                                            |
| 592.3424072 | 291.6222229004  | 1.24  |                                                                                            |
| 596.8339844 | 371.4857788086  | 1.58  |                                                                                            |
| 603.0700073 | 2498.6655273438 | 10.66 | y13-98[2+] (0.24)                                                                          |
| 604.213623  | 628.5274047852  | 2.68  | b7o (-0.13) : b14o[2+] (-0.13)                                                             |
| 605.4224243 | 264.7172241211  | 1.13  | b14*[2+] (0.58) : b7* (0.09)                                                               |
| 629.3730469 | 826.6108398438  | 3.52  |                                                                                            |
| 635.6049805 | 7219.5546875    | 30.82 |                                                                                            |
| 636.5630493 | 416.5586853027  | 1.77  |                                                                                            |
| 641.3455811 | 866.1926879883  | 3.69  | y7 (0.00)                                                                                  |

|             |                  |       |                                                                                   |
|-------------|------------------|-------|-----------------------------------------------------------------------------------|
| 642.3646851 | 340.0477600098,  | 1.45  | y13o[2+] (-0.44)                                                                  |
| 651.9412231 | 427.5472412109,  | 1.82  | y14-98[2+] (0.58) : y13[2+] (0.12)                                                |
| 663.4974365 | 554.2814331055,  | 2.36  |                                                                                   |
| 673.8565674 | 424.4962158203,  | 1.81  | a8o (0.45) : a8* (-0.53)                                                          |
| 677.6367188 | 540.478515625,   | 2.30  | a15[2+] (0.23)                                                                    |
| 691.8182373 | 1066.9110107422, | 4.55  | y14o[2+] (0.47) : b15[2+] (0.41) : a8 (0.40) : y14*[2+] (-0.01) : z14[2+] (-0.01) |
| 700.4591064 | 549.6945800781,  | 2.34  | c15[2+] (0.54) : y14[2+] (0.11)                                                   |
| 701.1758423 | 597.416015625,   | 2.55  | b8o (-0.22)                                                                       |
| 706.2801514 | 518.1684570313,  | 2.21  |                                                                                   |
| 712.2622681 | 736.9644165039,  | 3.14  | y8 (-0.11)                                                                        |
| 730.5428467 | 610.1337890625,  | 2.60  |                                                                                   |
| 732.4550781 | 518.559387207,   | 2.21  |                                                                                   |
| 738.7167969 | 1071.2553710938, | 4.57  |                                                                                   |
| 744.7149658 | 3943.1440429688, | 16.83 | a9o (0.27)                                                                        |
| 750.1541748 | 2916.2158203125, | 12.45 | x15[2+] (0.29)                                                                    |
| 752.5794678 | 1471.5670166016, | 6.28  |                                                                                   |
| 771.2575684 | 1213.443359375,  | 5.18  | y17-98[2+] (0.34) : y16[2+] (-0.12)                                               |
| 788.4609375 | 830.3670654297,  | 3.54  | a17*[2+] (0.55)                                                                   |
| 790.5495605 | 5031.9091796875, | 21.48 | b9 (0.10)                                                                         |
| 791.5098877 | 1767.1743164063, | 7.54  | y9o (0.09)                                                                        |
| 792.5715332 | 1773.0881347656, | 7.57  | z9 (0.17) : y9* (0.17)                                                            |
| 798.4227295 | 1713.2215576172, | 7.31  |                                                                                   |
| 801.3063965 | 841.5447998047,  | 3.59  | b17o[2+] (-0.10) : b17*[2+] (-0.59)                                               |
| 820.3164063 | 1207.5725097656, | 5.15  | y17[2+] (0.40)                                                                    |
| 821.2232666 | 318.2019042969,  | 1.35  |                                                                                   |
| 840.2712402 | 394.5956420898,  | 1.68  |                                                                                   |
| 846.6206055 | 684.8620605469,  | 2.92  | y18o[2+] (0.19) : y18*[2+] (-0.29) : z18[2+] (-0.29)                              |
| 854.755249  | 668.2221679688,  | 2.85  | y19-98[2+] (-0.20)                                                                |
| 855.5913086 | 2931.4663085938, | 12.51 | y18[2+] (0.16)                                                                    |
| 863.7662354 | 411.4609069824,  | 1.75  |                                                                                   |
| 871.2175293 | 519.3505859375,  | 2.21  | a19o[2+] (-0.24)                                                                  |
| 880.7216797 | 436.9247436523,  | 1.86  | a19[2+] (0.25)                                                                    |
| 894.6916504 | 1951.9211425781, | 8.33  | b19[2+] (0.22) : y19o[2+] (-0.25)                                                 |
| 895.5144043 | 1126.9504394531, | 4.81  | y19o[2+] (0.56) : y19*[2+] (0.07) : z19[2+] (0.07)                                |
| 903.7352295 | 13923.27734375,  | 59.45 | y20-98[2+] (0.24) : y19[2+] (-0.21)                                               |
| 904.5695801 | 6080.0546875,    | 25.96 | c10 (0.04)                                                                        |
| 912.7540283 | 957.983215332,   | 4.09  | a11o (0.22)                                                                       |
| 930.3392334 | 1977.0543212891, | 8.44  | a11 (-0.20)                                                                       |
| 936.8227539 | 2315.1467285156, | 9.88  |                                                                                   |
| 943.7270508 | 3006.5444335938, | 12.83 | y20o[2+] (0.25) : y20*[2+] (-0.24) : z20[2+] (-0.24)                              |
| 947.190918  | 3759.1779785156, | 16.05 | y21-98[2+] (0.18)                                                                 |
| 952.7352295 | 23419.04296875,  | 100   | y20[2+] (0.25)                                                                    |

|             |                 |       |                                                                       |
|-------------|-----------------|-------|-----------------------------------------------------------------------|
| 953.6113281 | 6837.4541015625 | 29.19 |                                                                       |
| 987.7427979 | 1261.1635742188 | 5.38  | y21*[2+] (0.25) : z21[2+] (0.25)                                      |
| 996.2458496 | 6968.00390625   | 29.75 | y21[2+] (0.24)                                                        |
| 997.0057373 | 1662.099609375  | 7.09  |                                                                       |
| 997.7365723 | 1376.5955810547 | 5.87  |                                                                       |
| 1011.223389 | 2446.6474609375 | 10.44 | y23-98[2+] (0.18) : b12o (-0.33)                                      |
| 1012.06189  | 1309.1455078125 | 5.59  | b12o (0.49) : b12* (-0.48)                                            |
| 1023.832764 | 557.1596679688  | 2.37  | c22[2+] (0.30)                                                        |
| 1031.693726 | 1832.7524414063 | 7.82  | y22[2+] (0.17)                                                        |
| 1042.819336 | 662.5329589844  | 2.82  |                                                                       |
| 1050.728516 | 705.7763671875  | 3.01  | b23[2+] (0.19) : y23o[2+] (-0.29)                                     |
| 1059.937866 | 1701.7784423828 | 7.26  | y23[2+] (-0.08)                                                       |
| 1060.697021 | 2552.3364257813 | 10.89 |                                                                       |
| 1067.805054 | 1907.2658691406 | 8.14  | y24-98[2+] (0.22)                                                     |
| 1068.778198 | 688.7384643555  | 2.94  |                                                                       |
| 1073.359131 | 334.7396850586  | 1.42  |                                                                       |
| 1084.633911 | 410.6767883301  | 1.75  | a24[2+] (-0.43)                                                       |
| 1107.873291 | 476.8552856445  | 2.03  | y24o[2+] (0.31) : c24[2+] (0.29) : y24*[2+] (-0.18) : z24[2+] (-0.18) |
| 1108.80896  | 248.2423095703  | 1.06  | b13o (0.19)                                                           |
| 1115.33667  | 244.4446716309  | 1.04  |                                                                       |
| 1116.449951 | 1569.3270263672 | 6.70  | y25-98[2+] (0.34) : y24[2+] (-0.11)                                   |
| 1117.349976 | 1305.6892089844 | 5.57  |                                                                       |



S32

# ProPhosSI MS/MS report

Mass: 810.091370 Charge: 3+

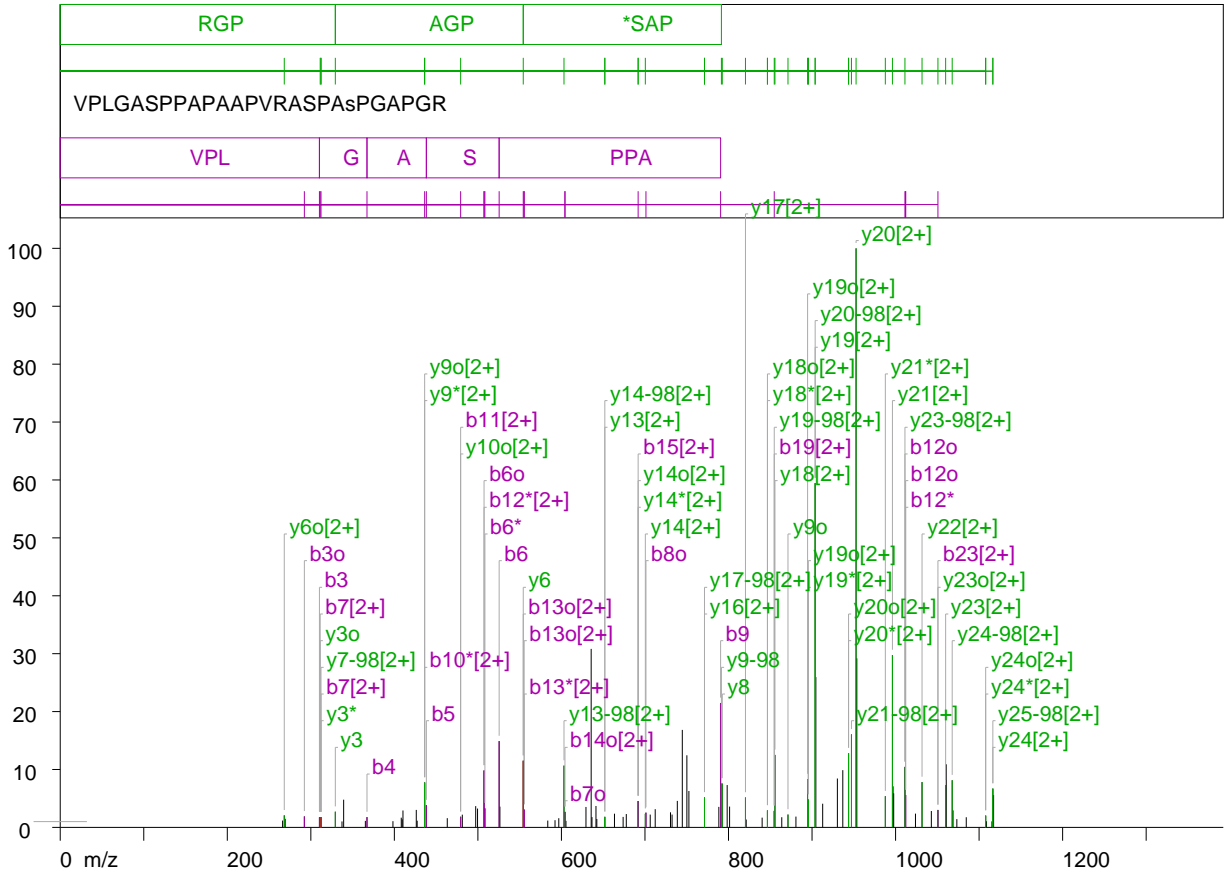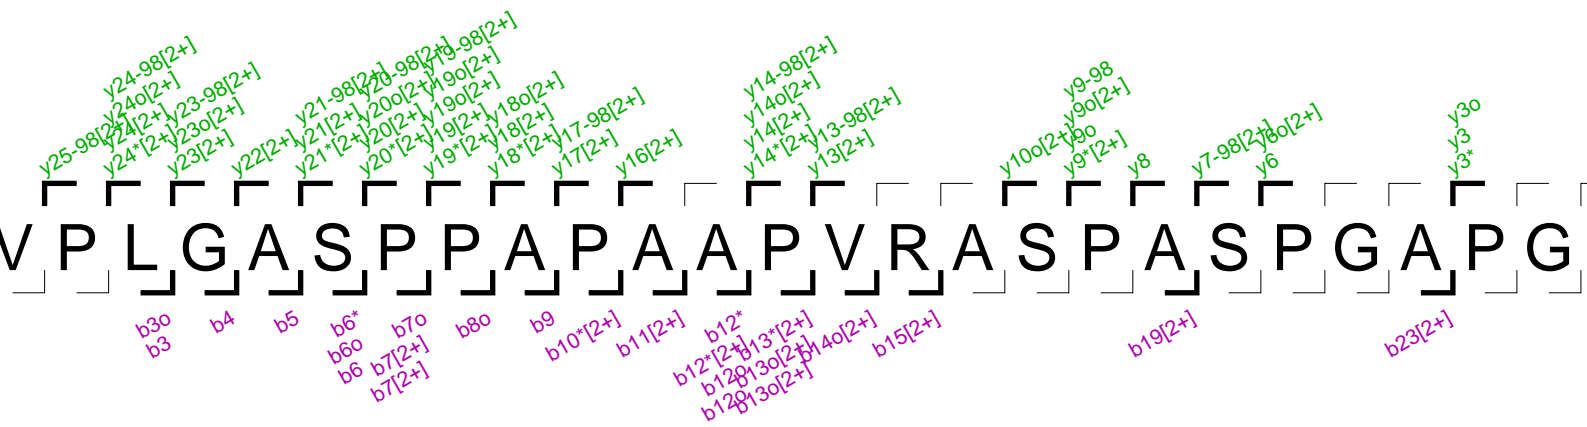

## Cav3.2 Rat

(23) 13 VPLGASPPAPAAPVRASPA<sub>s</sub>PGAPGR 38 2427.242 Da

|                         |     |
|-------------------------|-----|
| Parent Ion              | m/z |
| No parent ions observed |     |

### Modifications and supporting evidence

| Position | Residue ID | Modification | Evidence   |
|----------|------------|--------------|------------|
| 20       | (32)       | Phospho (ST) | y3=> y9-98 |

### Spectrum interpretation

| Rule                                   | passed/tests | Description                                                                                                                                                                                                                                                                                                                                                                                                                                                                                                                                                                                                                                                                                                                                            |
|----------------------------------------|--------------|--------------------------------------------------------------------------------------------------------------------------------------------------------------------------------------------------------------------------------------------------------------------------------------------------------------------------------------------------------------------------------------------------------------------------------------------------------------------------------------------------------------------------------------------------------------------------------------------------------------------------------------------------------------------------------------------------------------------------------------------------------|
| Parent ions present                    | 0/1          | Parent ions corresponding to the parent fragment - 1 phosphate ions were not found                                                                                                                                                                                                                                                                                                                                                                                                                                                                                                                                                                                                                                                                     |
| Three -98 Ions present                 | 1/1          | 11 des-phospho fragment ions were found.                                                                                                                                                                                                                                                                                                                                                                                                                                                                                                                                                                                                                                                                                                               |
| Unique -98 transitions present         | 1/1          | transition y3 to y9-98 support unique phosphorylation at position 20<br><br/>                                                                                                                                                                                                                                                                                                                                                                                                                                                                                                                                                                                                                                                                          |
| Four Sequential b or y ions            | 1/1          | Sequence of four b ions found from b3 to b6.                                                                                                                                                                                                                                                                                                                                                                                                                                                                                                                                                                                                                                                                                                           |
| Five of six sequential ions present    | 1/1          | Five of Six ions found between b2 and b7<br>Five of Six ions found between b3 and b8<br>Five of Six ions found between b4 and b9<br>Five of Six ions found between y19 and y24<br>Five of Six ions found between y20 and y25                                                                                                                                                                                                                                                                                                                                                                                                                                                                                                                           |
| Proline directed fragmentation pattern | 9/11         | FAIL: y25-98< y24-98<br/>No proline ions at b2<br/><br>NOTE: S-P is a low abundance fragmentation.<br>PASS: y20-98> y19-98 with ratio 20.8<br/><br>PASS: b7< b6 with ratio 8.35<br/><br>NOTE: P-P is a low abundance fragmentation.<br>PASS: y19-98> y18-98<br/><br>PASS: b8< b7<br/><br>PASS: y17-98> y16-98<br/><br>PASS: b10< b9<br/><br>FAIL: y14-98< y13-98<br/>No proline ions at b13<br/><br>NOTE: S-P is a low abundance fragmentation.<br>PASS: y9-98> y8-98<br/><br>No proline ions at b18<br/><br>NOTE: S-P is a low abundance fragmentation.<br>PASS: y6> y5<br/><br>No proline ions at b21-98<br/><br>PASS: y3> y2<br/><br>No proline ions at b24-98<br/>                                                                                 |
| PhosphoTyrosine transition present     | 0/0          | 0 of 0 phosphotyrosine transitions were found.                                                                                                                                                                                                                                                                                                                                                                                                                                                                                                                                                                                                                                                                                                         |
| Six of top ten ions identified         | 8/6          | ion 1 (mass: 952.7352295: intensity: 23419.04296875) assigned 1 times<br>ion 2 (mass: 903.7352295: intensity: 13923.27734375) assigned 2 times<br>ion 3 (mass: 635.6049805: intensity: 7219.5546875) assigned 0 times<br>ion 4 (mass: 996.2458496: intensity: 6968.00390625) assigned 1 times<br>ion 5 (mass: 953.6113281: intensity: 6837.4541015625) assigned 0 times<br>ion 6 (mass: 904.5695801: intensity: 6080.0546875) assigned 1 times<br>ion 7 (mass: 790.5495605: intensity: 5031.9091796875) assigned 1 times<br>ion 8 (mass: 744.7149658: intensity: 3943.1440429688) assigned 1 times<br>ion 9 (mass: 947.190918: intensity: 3759.1779785156) assigned 1 times<br>ion 10 (mass: 525.4376831: intensity: 3489.5012207031) assigned 1 times |

## Ion Table

59 ions assigned of 90 ions above threshold (65%).

### N-terminal ions

| AA | N-ion | b                                                         | b*                                                   | b-98     | bo                                                          |
|----|-------|-----------------------------------------------------------|------------------------------------------------------|----------|-------------------------------------------------------------|
| V  | 1     | 100.076                                                   | 83.049                                               | -        | 82.065                                                      |
| P  | 2     | 197.129                                                   | 180.102                                              | -        | 179.118                                                     |
| L  | 3     | 310.213<br>310.2914734 (1)                                | 293.186                                              | -        | 292.202<br>*292.2433167 (1)                                 |
| G  | 4     | 367.234<br>367.213501 (1)                                 | 350.208                                              | -        | 349.223                                                     |
| A  | 5     | 438.271<br>438.291687 (3)                                 | 421.245                                              | -        | 420.261                                                     |
| S  | 6     | 525.303<br>525.4376831 (14)                               | 508.277<br>508.3764648 (3)                           | -        | 507.293<br>*507.3612061 (9)                                 |
| P  | 7     | 622.356<br>*311.2166138 [2+] (1)<br>*312.1858521 [2+] (1) | 605.329                                              | -        | 604.345<br>*604.213623 (2)                                  |
| P  | 8     | 719.409                                                   | 702.382                                              | -        | 701.398<br>701.1758423 (2)                                  |
| A  | 9     | 790.446<br>790.5495605 (21)                               | 773.419                                              | -        | 772.435                                                     |
| P  | 10    | 887.499                                                   | 870.472<br>*436.2650757 [2+] (7)                     | -        | 869.488                                                     |
| A  | 11    | 958.536<br>*479.335968 [2+] (1)                           | 941.509                                              | -        | 940.525                                                     |
| A  | 12    | 1029.573                                                  | 1012.546<br>*1012.06189 (5)<br>*507.3612061 [2+] (9) | -        | 1011.562<br>*1011.223389 (10)<br>*1012.06189 (5)            |
| P  | 13    | 1126.626                                                  | 1109.599<br>*555.3710938 [2+] (3)                    | -        | 1108.615<br>*555.3710938 [2+] (3)<br>*554.3131104 [2+] (11) |
| V  | 14    | 1225.694                                                  | 1208.668                                             | -        | 1207.684<br>*604.213623 [2+] (2)                            |
| R  | 15    | 1381.795<br>*691.8182373 [2+] (4)                         | 1364.769                                             | -        | 1363.785                                                    |
| A  | 16    | 1452.832                                                  | 1435.806                                             | -        | 1434.822                                                    |
| S  | 17    | 1539.864                                                  | 1522.838                                             | -        | 1521.854                                                    |
| P  | 18    | 1636.917                                                  | 1619.891                                             | -        | 1618.907                                                    |
| A  | 19    | 1707.954<br>*854.755249 [2+] (2)                          | 1690.928                                             | -        | 1689.944                                                    |
| s  | 20    | 1874.953                                                  | 1857.926                                             | 1776.967 | 1856.942                                                    |
| P  | 21    | 1972.005                                                  | 1954.979                                             | 1874.019 | 1953.995                                                    |
| G  | 22    | 2029.027                                                  | 2012.000                                             | 1931.041 | 2011.016                                                    |
| A  | 23    | 2100.064<br>*1050.728516 [2+] (3)                         | 2083.037                                             | 2002.078 | 2082.053                                                    |
| P  | 24    | 2197.117                                                  | 2180.090                                             | 2099.131 | 2179.106                                                    |
| G  | 25    | 2254.138                                                  | 2237.112                                             | 2156.152 | 2236.128                                                    |
| R  | 26    | -                                                         | -                                                    | -        | -                                                           |

### C-terminal ions

| AA | C-ion | y                                 | y*                                | y-98                              | yo                                |
|----|-------|-----------------------------------|-----------------------------------|-----------------------------------|-----------------------------------|
| V  | 26    | -                                 | -                                 | -                                 | -                                 |
| P  | 25    | 2329.181                          | 2312.155                          | 2231.196<br>*1116.449951 [2+] (6) | 2311.171                          |
| L  | 24    | 2232.129<br>*1116.449951 [2+] (6) | 2215.102<br>*1107.873291 [2+] (2) | 2134.143<br>1067.805054 [2+] (8)  | 2214.118<br>*1107.873291 [2+] (2) |

|   |    |                                    |                                    |                                    |                                                           |
|---|----|------------------------------------|------------------------------------|------------------------------------|-----------------------------------------------------------|
| G | 23 | 2119.045<br>1059.937866 [2+] (7)   | 2102.018                           | 2021.059<br>*1011.223389 [2+] (10) | 2101.034<br>*1050.728516 [2+] (3)                         |
| A | 22 | 2062.023<br>1031.693726 [2+] (7)   | 2044.997                           | 1964.037                           | 2044.013                                                  |
| S | 21 | 1990.986<br>996.2458496 [2+] (29)  | 1973.959<br>*987.7427979 [2+] (5)  | 1893.000<br>947.190918 [2+] (16)   | 1972.975                                                  |
| P | 20 | 1903.954<br>952.7352295 [2+] (100) | 1886.927<br>*943.7270508 [2+] (12) | 1805.968<br>*903.7352295 [2+] (59) | 1885.943<br>*943.7270508 [2+] (12)                        |
| P | 19 | 1806.901<br>*903.7352295 [2+] (59) | 1789.875<br>*895.5144043 [2+] (4)  | 1708.915<br>*854.755249 [2+] (2)   | 1788.891<br>894.6916504 [2+] (8)<br>*895.5144043 [2+] (4) |
| A | 18 | 1709.848<br>855.5913086 [2+] (12)  | 1692.822<br>*846.6206055 [2+] (2)  | 1611.863                           | 1691.838<br>*846.6206055 [2+] (2)                         |
| P | 17 | 1638.811<br>*820.3164063 [2+] (5)  | 1621.785                           | 1540.825<br>*771.2575684 [2+] (5)  | 1620.801                                                  |
| A | 16 | 1541.759<br>*771.2575684 [2+] (5)  | 1524.732                           | 1443.773                           | 1523.748                                                  |
| A | 15 | 1470.721                           | 1453.695                           | 1372.736                           | 1452.711                                                  |
| P | 14 | 1399.684<br>*700.4591064 [2+] (2)  | 1382.658<br>*691.8182373 [2+] (4)  | 1301.698<br>*651.9412231 [2+] (1)  | 1381.674<br>*691.8182373 [2+] (4)                         |
| V | 13 | 1302.632<br>*651.9412231 [2+] (1)  | 1285.605                           | 1204.646<br>603.0700073 [2+] (10)  | 1284.621                                                  |
| R | 12 | 1203.563                           | 1186.537                           | 1105.577                           | 1185.553                                                  |
| A | 11 | 1047.462                           | 1030.435                           | 949.476                            | 1029.451                                                  |
| S | 10 | 976.425                            | 959.398                            | 878.439                            | 958.414<br>*479.335968 [2+] (1)                           |
| P | 9  | 889.393                            | 872.366<br>*436.2650757 [2+] (7)   | 791.407<br>791.5098877 (7)         | 871.382<br>871.2175293 (2)<br>*436.2650757 [2+] (7)       |
| A | 8  | 792.340<br>792.5715332 (7)         | 775.314                            | 694.354                            | 774.329                                                   |
| s | 7  | 721.303                            | 704.276                            | 623.317<br>*312.1858521 [2+] (1)   | 703.292                                                   |
| P | 6  | 554.305<br>*554.3131104 (11)       | 537.278                            | -                                  | 536.294<br>268.203949 [2+] (2)                            |
| G | 5  | 457.252                            | 440.225                            | -                                  | 439.241                                                   |
| A | 4  | 400.230                            | 383.204                            | -                                  | 382.220                                                   |
| P | 3  | 329.193<br>329.3317566 (2)         | 312.167<br>*312.1858521 (1)        | -                                  | 311.183<br>*311.2166138 (1)                               |
| G | 2  | 232.140                            | 215.114                            | -                                  | 214.130                                                   |
| R | 1  | 175.119                            | 158.092                            | -                                  | 157.108                                                   |

## Ion distribution

| Threshold | Ion count | Matches | % matched |
|-----------|-----------|---------|-----------|
| 0         | 132       | 76      | 57        |
| 0.5       | 124       | 70      | 56        |
| 1         | 105       | 64      | 60        |
| 2         | 74        | 49      | 66        |
| 3         | 55        | 37      | 67        |
| 4         | 42        | 32      | 76        |
| 5         | 37        | 28      | 75        |
| 10        | 17        | 14      | 82        |

Observed ions > 1%

| m/z         | Intensity       | % max | Assignment (delta)                                                  |
|-------------|-----------------|-------|---------------------------------------------------------------------|
| 266.2089844 | 276.302947998   | 1.17  |                                                                     |
| 268.203949  | 487.2700805664  | 2.08  | y6o[2+] (-0.44)                                                     |
| 269.2924805 | 349.4795227051  | 1.49  | y6*[2+] (0.14) : z6[2+] (0.14)                                      |
| 292.2433167 | 444.5546875     | 1.89  | x6[2+] (0.58) : b3o (0.04)                                          |
| 310.2914734 | 410.3699951172  | 1.75  | b3 (0.07)                                                           |
| 311.2166138 | 417.7741699219  | 1.78  | y3o (0.03) : b7[2+] (-0.46)                                         |
| 312.1858521 | 415.9727783203  | 1.77  | b7[2+] (0.50) : y7-98[2+] (0.02) : y3* (0.01) : z3 (0.01)           |
| 329.3317566 | 634.3988647461  | 2.70  | y3 (0.13)                                                           |
| 337.3043823 | 241.9138031006  | 1.03  | a8o[2+] (0.09) : a8*[2+] (-0.39)                                    |
| 339.3014832 | 1120.9458007813 | 4.78  | a4 (0.06)                                                           |
| 365.2946777 | 263.8448486328  | 1.12  |                                                                     |
| 367.213501  | 416.04296875    | 1.77  | b4 (-0.02)                                                          |
| 398.2878418 | 251.7483520508  | 1.07  |                                                                     |
| 408.2564087 | 393.1322631836  | 1.67  |                                                                     |
| 409.3639832 | 324.955078125   | 1.38  |                                                                     |
| 410.3105164 | 683.9563598633  | 2.92  | a5 (0.03) : x8[2+] (-0.36)                                          |
| 426.24823   | 707.6258544922  | 3.02  |                                                                     |
| 427.2878418 | 271.129699707   | 1.15  |                                                                     |
| 436.2650757 | 1816.3032226563 | 7.75  | b10*[2+] (0.52) : y9o[2+] (0.06) : z9[2+] (-0.42) : y9*[2+] (-0.42) |
| 438.291687  | 897.6844482422  | 3.83  | b5 (0.02)                                                           |
| 463.3316345 | 372.9010009766  | 1.59  |                                                                     |
| 479.335968  | 429.1842651367  | 1.83  | a6o (0.03) : y10o[2+] (-0.37) : b11[2+] (-0.43)                     |
| 481.3509827 | 514.9075317383  | 2.19  |                                                                     |
| 497.3687744 | 860.6733398438  | 3.67  | a6 (0.05)                                                           |
| 499.5850525 | 761.9863891602  | 3.25  |                                                                     |
| 507.3612061 | 2301.4807128906 | 9.82  | b12*[2+] (0.58) : b6o (0.06)                                        |
| 508.3764648 | 772.1566162109  | 3.29  | b6* (0.09)                                                          |
| 525.4376831 | 3489.5012207031 | 14.90 | b6 (0.13)                                                           |
| 526.3417358 | 840.4647827148  | 3.58  |                                                                     |
| 554.3131104 | 2697.4147949219 | 11.51 | y6 (0.00) : b13o[2+] (-0.49)                                        |
| 555.3710938 | 718.3114013672  | 3.06  | b13o[2+] (0.55) : b13*[2+] (0.06)                                   |
| 583.6594238 | 275.5367126465  | 1.17  |                                                                     |
| 592.3424072 | 291.6222229004  | 1.24  |                                                                     |
| 596.8339844 | 371.4857788086  | 1.58  |                                                                     |
| 603.0700073 | 2498.6655273438 | 10.66 | y13-98[2+] (0.24)                                                   |
| 604.213623  | 628.5274047852  | 2.68  | b7o (-0.13) : b14o[2+] (-0.13)                                      |
| 605.4224243 | 264.7172241211  | 1.13  | b14*[2+] (0.58) : b7* (0.09)                                        |
| 629.3730469 | 826.6108398438  | 3.52  |                                                                     |
| 635.6049805 | 7219.5546875    | 30.82 |                                                                     |
| 636.5630493 | 416.5586853027  | 1.77  |                                                                     |
| 641.3455811 | 866.1926879883  | 3.69  |                                                                     |

|             |                  |       |                                                                                   |
|-------------|------------------|-------|-----------------------------------------------------------------------------------|
| 642.3646851 | 340.0477600098,  | 1.45  | y13o[2+] (-0.44)                                                                  |
| 651.9412231 | 427.5472412109,  | 1.82  | y14-98[2+] (0.58) : y13[2+] (0.12)                                                |
| 663.4974365 | 554.2814331055,  | 2.36  |                                                                                   |
| 673.8565674 | 424.4962158203,  | 1.81  | a8o (0.45) : a8* (-0.53)                                                          |
| 677.6367188 | 540.478515625,   | 2.30  | a15[2+] (0.23)                                                                    |
| 691.8182373 | 1066.9110107422, | 4.55  | y14o[2+] (0.47) : b15[2+] (0.41) : a8 (0.40) : y14*[2+] (-0.01) : z14[2+] (-0.01) |
| 700.4591064 | 549.6945800781,  | 2.34  | c15[2+] (0.54) : y14[2+] (0.11)                                                   |
| 701.1758423 | 597.416015625,   | 2.55  | b8o (-0.22)                                                                       |
| 706.2801514 | 518.1684570313,  | 2.21  |                                                                                   |
| 712.2622681 | 736.9644165039,  | 3.14  |                                                                                   |
| 730.5428467 | 610.1337890625,  | 2.60  |                                                                                   |
| 732.4550781 | 518.559387207,   | 2.21  |                                                                                   |
| 738.7167969 | 1071.2553710938, | 4.57  |                                                                                   |
| 744.7149658 | 3943.1440429688, | 16.83 | a9o (0.27)                                                                        |
| 750.1541748 | 2916.2158203125, | 12.45 | x15[2+] (0.29)                                                                    |
| 752.5794678 | 1471.5670166016, | 6.28  |                                                                                   |
| 771.2575684 | 1213.443359375,  | 5.18  | y17-98[2+] (0.34) : y16[2+] (-0.12)                                               |
| 788.4609375 | 830.3670654297,  | 3.54  |                                                                                   |
| 790.5495605 | 5031.9091796875, | 21.48 | b9 (0.10)                                                                         |
| 791.5098877 | 1767.1743164063, | 7.54  | y9-98 (0.10)                                                                      |
| 792.5715332 | 1773.0881347656, | 7.57  | y8 (0.23)                                                                         |
| 798.4227295 | 1713.2215576172, | 7.31  |                                                                                   |
| 801.3063965 | 841.5447998047,  | 3.59  |                                                                                   |
| 820.3164063 | 1207.5725097656, | 5.15  | y17[2+] (0.40) : x8 (-0.01)                                                       |
| 821.2232666 | 318.2019042969,  | 1.35  |                                                                                   |
| 840.2712402 | 394.5956420898,  | 1.68  | a19[2+] (-0.21)                                                                   |
| 846.6206055 | 684.8620605469,  | 2.92  | y18o[2+] (0.19) : y18*[2+] (-0.29) : z18[2+] (-0.29)                              |
| 854.755249  | 668.2221679688,  | 2.85  | b19[2+] (0.27) : y19-98[2+] (-0.20)                                               |
| 855.5913086 | 2931.4663085938, | 12.51 | y18[2+] (0.16)                                                                    |
| 863.7662354 | 411.4609069824,  | 1.75  |                                                                                   |
| 871.2175293 | 519.3505859375,  | 2.21  | y9o (-0.16)                                                                       |
| 880.7216797 | 436.9247436523,  | 1.86  |                                                                                   |
| 894.6916504 | 1951.9211425781, | 8.33  | y19o[2+] (-0.25)                                                                  |
| 895.5144043 | 1126.9504394531, | 4.81  | y19o[2+] (0.56) : y19*[2+] (0.07) : z19[2+] (0.07)                                |
| 903.7352295 | 13923.27734375,  | 59.45 | y20-98[2+] (0.24) : y19[2+] (-0.21)                                               |
| 904.5695801 | 6080.0546875,    | 25.96 | c10 (0.04)                                                                        |
| 912.7540283 | 957.983215332,   | 4.09  | a11o (0.22)                                                                       |
| 930.3392334 | 1977.0543212891, | 8.44  | a11 (-0.20)                                                                       |
| 936.8227539 | 2315.1467285156, | 9.88  |                                                                                   |
| 943.7270508 | 3006.5444335938, | 12.83 | y20o[2+] (0.25) : y20*[2+] (-0.24) : z20[2+] (-0.24)                              |
| 947.190918  | 3759.1779785156, | 16.05 | y21-98[2+] (0.18)                                                                 |
| 952.7352295 | 23419.04296875,  | 100   | y20[2+] (0.25)                                                                    |

|             |                  |       |                                                                       |
|-------------|------------------|-------|-----------------------------------------------------------------------|
| 953.6113281 | 6837.4541015625, | 29.19 |                                                                       |
| 987.7427979 | 1261.1635742188, | 5.38  | y21*[2+] (0.25) : z21[2+] (0.25)                                      |
| 996.2458496 | 6968.00390625,   | 29.75 | y21[2+] (0.24)                                                        |
| 997.0057373 | 1662.099609375,  | 7.09  |                                                                       |
| 997.7365723 | 1376.5955810547, | 5.87  |                                                                       |
| 1011.223389 | 2446.6474609375, | 10.44 | y23-98[2+] (0.18) : b12o (-0.33)                                      |
| 1012.06189  | 1309.1455078125, | 5.59  | b12o (0.49) : b12* (-0.48)                                            |
| 1023.832764 | 557.1596679688,  | 2.37  | c22[2+] (0.30)                                                        |
| 1031.693726 | 1832.7524414063, | 7.82  | y22[2+] (0.17)                                                        |
| 1042.819336 | 662.5329589844,  | 2.82  |                                                                       |
| 1050.728516 | 705.7763671875,  | 3.01  | b23[2+] (0.19) : y23o[2+] (-0.29)                                     |
| 1059.937866 | 1701.7784423828, | 7.26  | y23[2+] (-0.08)                                                       |
| 1060.697021 | 2552.3364257813, | 10.89 |                                                                       |
| 1067.805054 | 1907.2658691406, | 8.14  | y24-98[2+] (0.22)                                                     |
| 1068.778198 | 688.7384643555,  | 2.94  |                                                                       |
| 1073.359131 | 334.7396850586,  | 1.42  |                                                                       |
| 1084.633911 | 410.6767883301,  | 1.75  | a24[2+] (-0.43)                                                       |
| 1107.873291 | 476.8552856445,  | 2.03  | y24o[2+] (0.31) : c24[2+] (0.29) : y24*[2+] (-0.18) : z24[2+] (-0.18) |
| 1108.80896  | 248.2423095703,  | 1.06  | b13o (0.19)                                                           |
| 1115.33667  | 244.4446716309,  | 1.04  |                                                                       |
| 1116.449951 | 1569.3270263672, | 6.70  | y25-98[2+] (0.34) : y24[2+] (-0.11)                                   |
| 1117.349976 | 1305.6892089844, | 5.57  |                                                                       |



S442 and  
S445/T446  
(diP)

# ProPhosSI MS/MS report

Mass: 924.050659179688 Charge: 3+

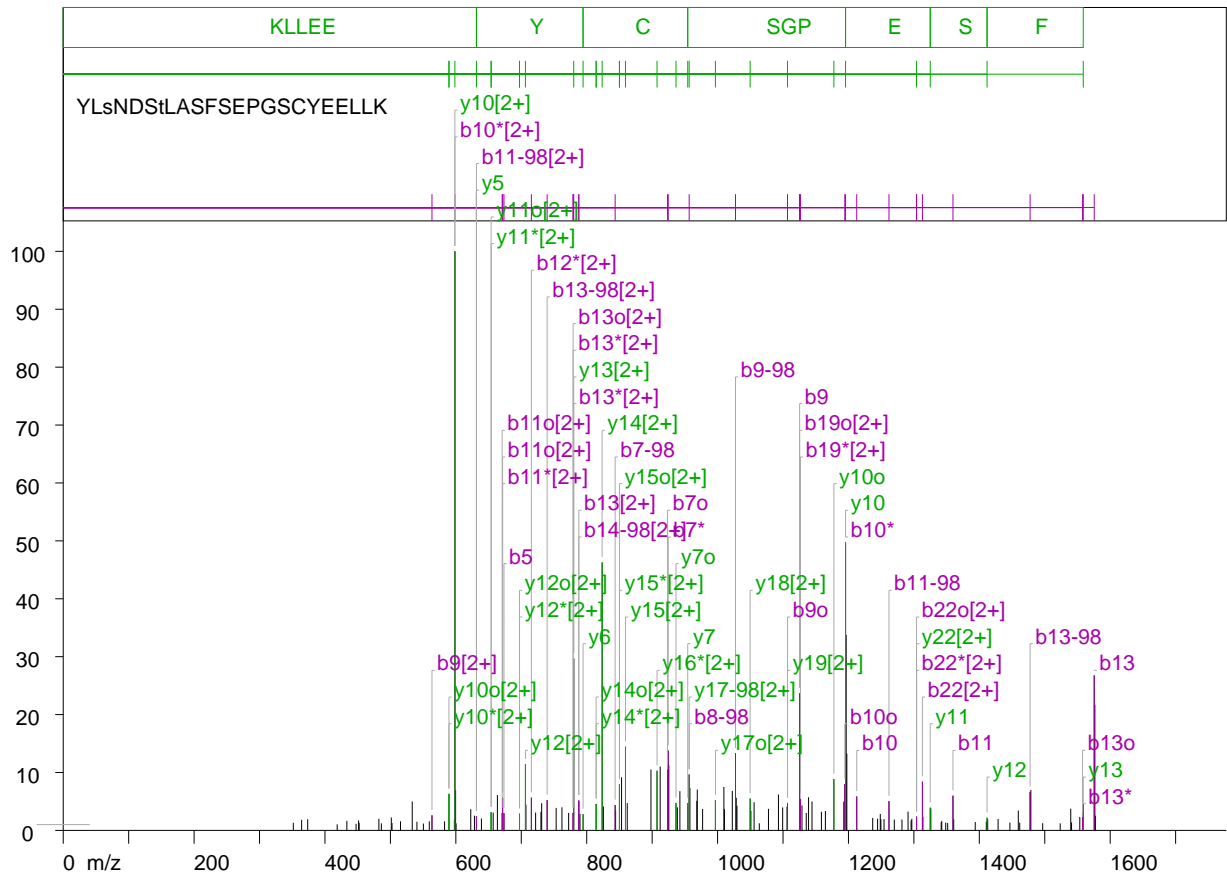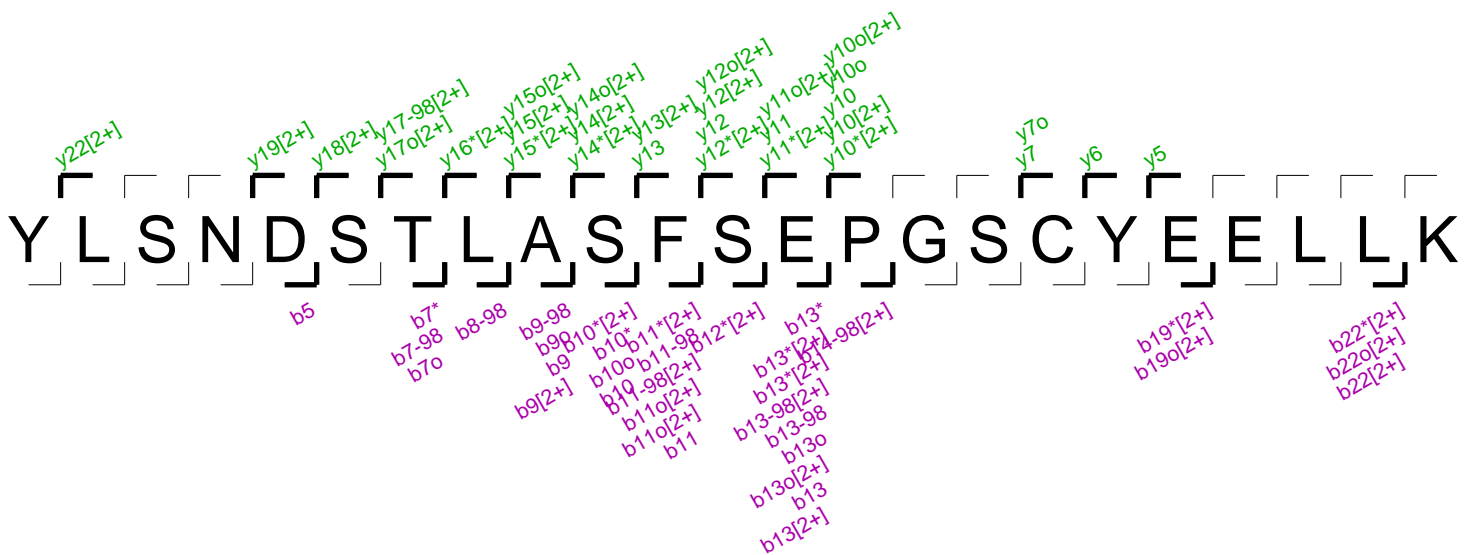

## Cav3.2 Rat

(23) 440 YLsNDSiLASFSEPGSCYEELLK 462 2769.117 (0.0114) Da

|                         |     |
|-------------------------|-----|
| Parent Ion              | m/z |
| No parent ions observed |     |

### Modifications and supporting evidence

| Position | Residue ID   | Modification | Evidence            |
|----------|--------------|--------------|---------------------|
| 3        | (442)        | Phospho (ST) | y15[2+]=>y18[2+]    |
| 6 or 7   | (445 or 446) | Phospho (ST) | b7-98, b8-98, b9-98 |

### Spectrum interpretation

| Rule                                   | passed/tests | Description                                                                                                                                                                                                                                                                                                                                                                                                                                                                                                                                                                                                                                                                                                                                            |
|----------------------------------------|--------------|--------------------------------------------------------------------------------------------------------------------------------------------------------------------------------------------------------------------------------------------------------------------------------------------------------------------------------------------------------------------------------------------------------------------------------------------------------------------------------------------------------------------------------------------------------------------------------------------------------------------------------------------------------------------------------------------------------------------------------------------------------|
| Parent ions present                    | 0/1          | Parent ions corresponding to the parent fragment - 2 phosphate ions were not found                                                                                                                                                                                                                                                                                                                                                                                                                                                                                                                                                                                                                                                                     |
| Three -98 Ions present                 | 0/1          | 1 des-phospho fragment ions were found.                                                                                                                                                                                                                                                                                                                                                                                                                                                                                                                                                                                                                                                                                                                |
| Unique -98 transitions present         | 1/2          | transition y15[2+] to y18[2+] suggests one phosphorylation at position 6 or 7; the ions b7-98, b8-98, b9-98 suggest 2 phosphorylations at position 3, 6 and/or 7.                                                                                                                                                                                                                                                                                                                                                                                                                                                                                                                                                                                      |
| Four Sequential b or y ions            | 1/1          | Sequence of four y ions found from y10 to y13.                                                                                                                                                                                                                                                                                                                                                                                                                                                                                                                                                                                                                                                                                                         |
| Five of six sequential ions present    | 1/1          | Five of Six ions found between y9 and y14<br>Five of Six ions found between y10 and y15<br>Five of Six ions found between y11 and y16<br>Five of Six ions found between y12 and y17                                                                                                                                                                                                                                                                                                                                                                                                                                                                                                                                                                    |
| Proline directed fragmentation pattern | 1/1          | PASS: y10> y9<br/><br>No proline ions at b14-196<br/>                                                                                                                                                                                                                                                                                                                                                                                                                                                                                                                                                                                                                                                                                                  |
| PhosphoTyrosine transition present     | 0/0          | 0 of 0 phosphotyrosine transitions were found.                                                                                                                                                                                                                                                                                                                                                                                                                                                                                                                                                                                                                                                                                                         |
| Six of top ten ions identified         | 8/6          | ion 1 (mass: 598.5263062: intensity: 3755.2878417969) assigned 2 times<br>ion 2 (mass: 1195.557861: intensity: 1867.1243896484) assigned 2 times<br>ion 3 (mass: 823.5628052: intensity: 1737.8587646484) assigned 1 times<br>ion 4 (mass: 1196.558594: intensity: 1268.205078125) assigned 0 times<br>ion 5 (mass: 780.1264038: intensity: 1114.9024658203) assigned 2 times<br>ion 6 (mass: 1575.590088: intensity: 1005.0581665039) assigned 1 times<br>ion 7 (mass: 1125.391479: intensity: 888.6829223633) assigned 2 times<br>ion 8 (mass: 1576.577026: intensity: 816.4624633789) assigned 0 times<br>ion 9 (mass: 859.2328491: intensity: 542.826171875) assigned 1 times<br>ion 10 (mass: 924.5922241: intensity: 517.65625) assigned 1 times |

### Ion Table

53 ions assigned of 109 ions above threshold (48%).

#### N-terminal ions

| AA | N-ion | b       | b*      | b-196 | b-98    | bo      |
|----|-------|---------|---------|-------|---------|---------|
| Y  | 1     | 164.071 | 147.044 | -     | -       | 146.060 |
| L  | 2     | 277.155 | 260.128 | -     | -       | 259.144 |
| s  | 3     | 444.153 | 427.127 | -     | 346.167 | 426.142 |

|   |    |                                                        |                                                                                 |          |                                                       |                                                           |
|---|----|--------------------------------------------------------|---------------------------------------------------------------------------------|----------|-------------------------------------------------------|-----------------------------------------------------------|
| N | 4  | 558.196                                                | 541.169                                                                         | -        | 460.210                                               | 540.185                                                   |
| D | 5  | 673.223<br>673.5197144 (2)                             | 656.196                                                                         | -        | 575.237                                               | 655.212                                                   |
| S | 6  | 760.255                                                | 743.228                                                                         | -        | 662.269                                               | 742.244                                                   |
| t | 7  | 941.269                                                | 924.242<br>924.5922241 (13)                                                     | 745.297  | 843.283<br>843.4760132 (4)                            | 923.258<br>923.5216064 (10)                               |
| L | 8  | 1054.353                                               | 1037.326                                                                        | 858.381  | 956.367<br>*956.5828247 (9)                           | 1036.342                                                  |
| A | 9  | 1125.390<br>*1125.391479 (23)<br>*563.5286865 [2+] (2) | 1108.364                                                                        | 929.418  | 1027.404<br>1027.371216 (13)                          | 1107.380<br>*1106.87793 (4)                               |
| S | 10 | 1212.422<br>1212.658569 (5)                            | 1195.396<br>*598.5263062 [2+] (100)<br>*1195.557861 (49)                        | 1016.450 | 1114.436                                              | 1194.412<br>1194.432251 (7)                               |
| F | 11 | 1359.491<br>1359.707764 (5)                            | 1342.464<br>*671.4653931 [2+] (5)                                               | 1163.519 | 1261.505<br>*1261.935547 (5)<br>*631.4736938 [2+] (2) | 1341.480<br>670.7871094 [2+] (3)<br>*671.4653931 [2+] (5) |
| S | 12 | 1446.523                                               | 1429.496<br>*715.4228516 [2+] (5)                                               | 1250.551 | 1348.537                                              | 1428.512                                                  |
| E | 13 | 1575.565<br>1575.590088 (26)<br>*787.9171753 [2+] (5)  | 1558.539<br>*1558.836304 (4)<br>*779.2491455 [2+] (3)<br>*780.1264038 [2+] (29) | 1379.593 | 1477.579<br>739.5264282 [2+] (5)<br>1477.5802 (6)     | 1557.555<br>1557.725952 (2)<br>*779.2491455 [2+] (3)      |
| P | 14 | 1672.618                                               | 1655.591                                                                        | 1476.646 | 1574.632<br>*787.9171753 [2+] (5)                     | 1654.607                                                  |
| G | 15 | 1729.639                                               | 1712.613                                                                        | 1533.668 | 1631.654                                              | 1711.629                                                  |
| S | 16 | 1816.671                                               | 1799.645                                                                        | 1620.700 | 1718.686                                              | 1798.661                                                  |
| C | 17 | 1976.702                                               | 1959.676                                                                        | 1780.730 | 1878.716                                              | 1958.692                                                  |
| Y | 18 | 2139.765                                               | 2122.739                                                                        | 1943.794 | 2041.780                                              | 2121.755                                                  |
| E | 19 | 2268.808                                               | 2251.782<br>*1126.615967 [2+] (5)                                               | 2072.836 | 2170.822                                              | 2250.798<br>*1125.391479 [2+] (23)                        |
| E | 20 | 2397.851                                               | 2380.824                                                                        | 2201.879 | 2299.865                                              | 2379.840                                                  |
| L | 21 | 2510.935                                               | 2493.908                                                                        | 2314.963 | 2412.949                                              | 2492.924                                                  |
| L | 22 | 2624.019<br>*1313.018555 [2+] (8)                      | 2606.992<br>*1304.065552 [2+] (2)                                               | 2428.047 | 2526.033                                              | 2606.008<br>*1304.065552 [2+] (2)                         |
| K | 23 | -                                                      | -                                                                               | -        | -                                                     | -                                                         |

### C-terminal ions

| AA | C-ion | y                                 | y*                                 | y-196    | y-98                              | yo                                |
|----|-------|-----------------------------------|------------------------------------|----------|-----------------------------------|-----------------------------------|
| Y  | 23    | -                                 | -                                  | -        | -                                 | -                                 |
| L  | 22    | 2607.061<br>*1304.065552 [2+] (2) | 2590.034                           | 2411.089 | 2509.075                          | 2589.050                          |
| s  | 21    | 2493.977                          | 2476.950                           | 2298.005 | 2395.991                          | 2475.966                          |
| N  | 20    | 2326.979                          | 2309.952                           | -        | 2228.993                          | 2308.968                          |
| D  | 19    | 2212.936<br>*1106.87793 [2+] (4)  | 2195.909                           | -        | 2114.950                          | 2194.925                          |
| S  | 18    | 2097.909<br>1049.748901 [2+] (5)  | 2080.882                           | -        | 1999.923                          | 2079.898                          |
| t  | 17    | 2010.877                          | 1993.850                           | -        | 1912.891<br>*956.5828247 [2+] (9) | 1992.866<br>996.7018433 [2+] (5)  |
| L  | 16    | 1829.863                          | 1812.836<br>*907.4781494 [2+] (10) | -        | -                                 | 1811.852                          |
| A  | 15    | 1716.779<br>859.2328491 [2+] (14) | 1699.752<br>*850.0323486 [2+] (7)  | -        | -                                 | 1698.768<br>*850.0323486 [2+] (7) |

|   |    |                                                             |                                   |   |   |                                                       |
|---|----|-------------------------------------------------------------|-----------------------------------|---|---|-------------------------------------------------------|
| S | 14 | 1645.742<br>823.5628052 [2+] (46)                           | 1628.715<br>*814.4630737 [2+] (4) | - | - | 1627.731<br>*814.4630737 [2+] (4)                     |
| F | 13 | 1558.709<br>*1558.836304 (4)<br>*780.1264038 [2+]<br>(29)   | 1541.683                          | - | - | 1540.699                                              |
| S | 12 | 1411.641<br>1411.824463 (2)<br>706.3464355 [2+] (11)        | 1394.615<br>*697.2852173 [2+] (2) | - | - | 1393.631<br>*697.2852173 [2+] (2)                     |
| E | 11 | 1324.609<br>1324.991333 (3)                                 | 1307.582<br>*653.9119263 [2+] (3) | - | - | 1306.598<br>*653.9119263 [2+] (3)                     |
| P | 10 | 1195.566<br>*598.5263062 [2+]<br>(100)<br>*1195.557861 (49) | 1178.540<br>*589.4939575 [2+] (6) | - | - | 1177.556<br>*1177.698608 (8)<br>*589.4939575 [2+] (6) |
| G | 9  | 1098.514                                                    | 1081.487                          | - | - | 1080.503                                              |
| S | 8  | 1041.492                                                    | 1024.466                          | - | - | 1023.482                                              |
| C | 7  | 954.460<br>954.394165 (4)                                   | 937.434                           | - | - | 936.450<br>936.4575806 (4)                            |
| Y | 6  | 794.430<br>*794.4381714 (2)                                 | 777.403                           | - | - | 776.419                                               |
| E | 5  | 631.366<br>*631.4736938 (2)                                 | 614.340                           | - | - | 613.356                                               |
| E | 4  | 502.324                                                     | 485.297                           | - | - | 484.313                                               |
| L | 3  | 373.281                                                     | 356.254                           | - | - | 355.270                                               |
| L | 2  | 260.197                                                     | 243.170                           | - | - | 242.186                                               |
| K | 1  | 147.113                                                     | 130.086                           | - | - | 129.102                                               |

## Ion distribution

| Threshold | Ion count | Matches | % matched |
|-----------|-----------|---------|-----------|
| 0         | 183       | 77      | 42        |
| 0.5       | 174       | 74      | 42        |
| 1         | 147       | 67      | 45        |
| 2         | 108       | 53      | 49        |
| 3         | 90        | 43      | 47        |
| 4         | 65        | 38      | 58        |
| 5         | 48        | 31      | 64        |
| 10        | 18        | 12      | 66        |

## Observed ions > 1%

| m/z         | Intensity      | % max | Assignment (delta)            |
|-------------|----------------|-------|-------------------------------|
| 351.6018066 | 49.2358016968, | 1.31  |                               |
| 364.3315735 | 68.8338623047, | 1.83  |                               |
| 373.599762  | 71.9727554321, | 1.91  | b7-196[2+] (0.44) : y3 (0.31) |
| 418.6609802 | 39.3440246582, | 1.04  |                               |
| 433.47052   | 62.0638809204, | 1.65  |                               |
| 447.5223694 | 42.9983825684, | 1.14  |                               |
| 451.3696594 | 64.55884552,   | 1.71  |                               |
| 452.1956787 | 48.9850692749, | 1.30  |                               |
| 482.3526001 | 75.3079910278, | 2.00  |                               |

|             |                 |       |                                                                        |
|-------------|-----------------|-------|------------------------------------------------------------------------|
| 486.140564  | 46.1388092041   | 1.22  |                                                                        |
| 501.3679199 | 83.8587799072   | 2.23  |                                                                        |
| 502.4713135 | 47.4131088257   | 1.26  | y4 (0.14)                                                              |
| 515.4168091 | 59.3086700439   | 1.57  |                                                                        |
| 533.376709  | 187.578414917   | 4.99  |                                                                        |
| 540.5346069 | 55.8994789124   | 1.48  | b4o (0.34) : a9o[2+] (0.33) : a9*[2+] (-0.15) : y9o[2+] (-0.22)        |
| 550.4015503 | 44.5072021484   | 1.18  |                                                                        |
| 559.4163818 | 58.8001708984   | 1.56  |                                                                        |
| 563.5286865 | 97.9052276611   | 2.60  | b9[2+] (0.32) : x9[2+] (-0.22)                                         |
| 582.7800903 | 58.5253982544   | 1.55  | b11-196[2+] (0.51)                                                     |
| 589.4939575 | 237.1043548584  | 6.31  | y10o[2+] (0.21) : y10*[2+] (-0.28) : z10[2+] (-0.28)                   |
| 597.7462158 | 71.3273620605   | 1.89  | b10o[2+] (0.03) : b10*[2+] (-0.45) : y10[2+] (-0.54)                   |
| 598.5263062 | 3755.2878417969 | 100   | b10*[2+] (0.32) : y10[2+] (0.23)                                       |
| 599.6279907 | 260.1499023438  | 6.92  |                                                                        |
| 600.317627  | 45.4025688171   | 1.20  |                                                                        |
| 622.777832  | 137.7054595947  | 3.66  |                                                                        |
| 628.4204102 | 95.4187088013   | 2.54  | a5* (0.21)                                                             |
| 631.4736938 | 91.8992767334   | 2.44  | b11-98[2+] (0.21) : y5 (0.10)                                          |
| 639.1132202 | 77.2213973999   | 2.05  |                                                                        |
| 653.9119263 | 117.5107421875  | 3.12  | y11o[2+] (0.10) : y11*[2+] (-0.38) : z11[2+] (-0.38)                   |
| 657.0546265 | 115.3550643921  | 3.07  | a11o[2+] (-0.19)                                                       |
| 663.503418  | 229.1204223633  | 6.10  |                                                                        |
| 670.7871094 | 113.415435791   | 3.02  | b11o[2+] (-0.45)                                                       |
| 671.4653931 | 212.1249694824  | 5.64  | b11o[2+] (0.22) : b11*[2+] (-0.27)                                     |
| 673.5197144 | 111.9337158203  | 2.98  | b5 (0.29)                                                              |
| 697.2852173 | 108.2911605835  | 2.88  | y12o[2+] (-0.03) : y12*[2+] (-0.52) : z12[2+] (-0.52)                  |
| 706.3464355 | 428.8691711426  | 11.42 | y12[2+] (0.02)                                                         |
| 707.1088867 | 166.4955596924  | 4.43  |                                                                        |
| 715.4228516 | 212.389465332   | 5.65  | a6* (0.18) : b12*[2+] (0.17)                                           |
| 721.9362793 | 115.8266601563  | 3.08  |                                                                        |
| 730.0787354 | 120.1991348267  | 3.20  |                                                                        |
| 731.1859741 | 176.6515045166  | 4.70  |                                                                        |
| 739.5264282 | 196.2640380859  | 5.22  | b13-98[2+] (0.23)                                                      |
| 753.3244019 | 146.0010070801  | 3.88  |                                                                        |
| 762.1696167 | 149.7145385742  | 3.98  |                                                                        |
| 772.3921509 | 113.2326965332  | 3.01  |                                                                        |
| 779.2491455 | 114.0820846558  | 3.03  | b13o[2+] (-0.03) : b13*[2+] (-0.52)                                    |
| 780.1264038 | 1114.9024658203 | 29.68 | b13*[2+] (0.35) : y13[2+] (0.26)                                       |
| 787.9171753 | 193.6899871826  | 5.15  | b14-98[2+] (0.09) : b13[2+] (-0.36)                                    |
| 789.6920776 | 107.6623687744  | 2.86  |                                                                        |
| 794.4381714 | 105.5156326294  | 2.80  | x13[2+] (0.58) : y6 (0.00)                                             |
| 814.4630737 | 171.807723999   | 4.57  | a14*[2+] (0.16) : y14o[2+] (0.09) : y14*[2+] (-0.39) : z14[2+] (-0.39) |

|             |                              |       |                                                      |
|-------------|------------------------------|-------|------------------------------------------------------|
| 823.5628052 | 1737.8587646484 <sub>3</sub> | 46.27 | y14[2+] (0.18)                                       |
| 825.5532837 | 155.0833740234 <sub>3</sub>  | 4.12  |                                                      |
| 843.4760132 | 164.7424316406 <sub>3</sub>  | 4.38  | b7-98 (0.19)                                         |
| 844.1629028 | 128.6432495117 <sub>3</sub>  | 3.42  |                                                      |
| 850.0323486 | 298.0325927734 <sub>3</sub>  | 7.93  | y15o[2+] (0.14) : y15*[2+] (-0.34) : z15[2+] (-0.34) |
| 853.2647095 | 344.5879821777 <sub>3</sub>  | 9.17  |                                                      |
| 859.2328491 | 542.826171875 <sub>3</sub>   | 14.45 | y15[2+] (0.33)                                       |
| 861.9293823 | 177.1485290527 <sub>3</sub>  | 4.71  |                                                      |
| 898.1708984 | 395.0063171387 <sub>3</sub>  | 10.51 |                                                      |
| 907.4781494 | 386.6175537109 <sub>3</sub>  | 10.29 | y16*[2+] (0.55) : z16[2+] (0.55)                     |
| 912.262207  | 413.7712097168 <sub>3</sub>  | 11.01 |                                                      |
| 923.5216064 | 393.0085754395 <sub>3</sub>  | 10.46 | b7o (0.26)                                           |
| 924.5922241 | 517.65625 <sub>3</sub>       | 13.78 | b7* (0.34)                                           |
| 925.4887085 | 422.8198852539 <sub>3</sub>  | 11.25 |                                                      |
| 936.4575806 | 178.2256469727 <sub>3</sub>  | 4.74  | y7o (0.00)                                           |
| 938.5404663 | 149.677230835 <sub>3</sub>   | 3.98  |                                                      |
| 942.3861084 | 254.5924072266 <sub>3</sub>  | 6.77  |                                                      |
| 954.394165  | 176.7706451416 <sub>3</sub>  | 4.70  | y7 (-0.06)                                           |
| 956.5828247 | 362.2992248535 <sub>3</sub>  | 9.64  | b8-98 (0.21) : y17-98[2+] (-0.36)                    |
| 957.706665  | 273.9228515625 <sub>3</sub>  | 7.29  | c7 (-0.58)                                           |
| 968.2559204 | 191.8166351318 <sub>3</sub>  | 5.10  |                                                      |
| 968.9608154 | 264.8502807617 <sub>3</sub>  | 7.05  |                                                      |
| 977.121521  | 139.495880127 <sub>3</sub>   | 3.71  |                                                      |
| 996.7018433 | 195.0431976318 <sub>3</sub>  | 5.19  | y17o[2+] (-0.23)                                     |
| 1009.610718 | 281.5429077148 <sub>3</sub>  | 7.49  | a8* (0.27)                                           |
| 1010.482178 | 138.0122680664 <sub>3</sub>  | 3.67  |                                                      |
| 1022.477661 | 256.4462890625 <sub>3</sub>  | 6.82  |                                                      |
| 1027.371216 | 499.8677368164 <sub>3</sub>  | 13.31 | b9-98 (-0.03)                                        |
| 1028.541016 | 211.6258239746 <sub>3</sub>  | 5.63  |                                                      |
| 1029.614136 | 159.7338562012 <sub>3</sub>  | 4.25  |                                                      |
| 1049.748901 | 206.9935302734 <sub>3</sub>  | 5.51  | y18[2+] (0.29)                                       |
| 1050.914429 | 127.2528381348 <sub>3</sub>  | 3.38  |                                                      |
| 1055.796875 | 182.7055053711 <sub>3</sub>  | 4.86  | a18[2+] (-0.59)                                      |
| 1063.732666 | 45.8966140747 <sub>3</sub>   | 1.22  | x18[2+] (0.27)                                       |
| 1077.765259 | 139.6354827881 <sub>3</sub>  | 3.71  |                                                      |
| 1093.015747 | 232.6449432373 <sub>3</sub>  | 6.19  |                                                      |
| 1099.45459  | 149.1550140381 <sub>3</sub>  | 3.97  |                                                      |
| 1106.076904 | 153.1938781738 <sub>3</sub>  | 4.07  |                                                      |
| 1106.87793  | 177.8388366699 <sub>3</sub>  | 4.73  | y19[2+] (-0.09) : b9o (-0.50)                        |
| 1125.391479 | 888.6829223633 <sub>3</sub>  | 23.66 | b9 (0.00) : b19o[2+] (-0.51)                         |
| 1126.615967 | 203.8230743408 <sub>3</sub>  | 5.42  | b19*[2+] (0.22) : x9 (0.10)                          |
| 1128.943726 | 162.1570739746 <sub>3</sub>  | 4.31  |                                                      |
| 1135.515137 | 113.0890426636 <sub>3</sub>  | 3.01  |                                                      |

|             |                  |       |                                                    |
|-------------|------------------|-------|----------------------------------------------------|
| 1139.023193 | 214.839553833,   | 5.72  |                                                    |
| 1144.293945 | 187.6215667725,  | 4.99  |                                                    |
| 1158.667603 | 120.7823257446,  | 3.21  |                                                    |
| 1164.76709  | 125.4929580688,  | 3.34  |                                                    |
| 1177.698608 | 332.8663330078,  | 8.86  | y10o (0.14) : x20[2+] (-0.29)                      |
| 1192.880371 | 187.0800018311,  | 4.98  |                                                    |
| 1194.432251 | 300.0869445801,  | 7.99  | b10o (0.02)                                        |
| 1195.557861 | 1867.1243896484, | 49.71 | b10* (0.16) : y10 (-0.00)                          |
| 1196.558594 | 1268.205078125,  | 33.77 |                                                    |
| 1197.53772  | 497.7731018066,  | 13.25 |                                                    |
| 1212.658569 | 220.2799682617,  | 5.86  | b10 (0.23)                                         |
| 1237.041138 | 80.6132583618,   | 2.14  |                                                    |
| 1244.505127 | 76.4034881592,   | 2.03  |                                                    |
| 1248.617554 | 107.1978302002,  | 2.85  |                                                    |
| 1249.586914 | 73.1403121948,   | 1.94  |                                                    |
| 1254.374512 | 73.1107788086,   | 1.94  |                                                    |
| 1261.935547 | 189.6396484375,  | 5.04  | x21[2+] (0.44) : b11-98 (0.43)                     |
| 1270.070068 | 70.2635803223,   | 1.87  |                                                    |
| 1281.762939 | 70.4279937744,   | 1.87  |                                                    |
| 1291.06665  | 121.7464141846,  | 3.24  |                                                    |
| 1295.704346 | 64.6614608765,   | 1.72  | y22*[2+] (0.18) : z22[2+] (0.18)                   |
| 1296.812256 | 75.0693969727,   | 1.99  |                                                    |
| 1304.065552 | 88.9776000977,   | 2.36  | b22o[2+] (0.55) : b22*[2+] (0.06) : y22[2+] (0.03) |
| 1313.018555 | 316.4009399414,  | 8.42  | b22[2+] (0.50) : a11o (-0.46)                      |
| 1313.761841 | 89.4039001465,   | 2.38  | a11o (0.27)                                        |
| 1324.991333 | 147.361541748,   | 3.92  | y11 (0.38)                                         |
| 1325.879639 | 141.916229248,   | 3.77  |                                                    |
| 1341.702393 | 52.5965957642,   | 1.40  | b11o (0.22)                                        |
| 1342.577148 | 61.2493095398,   | 1.63  | b11* (0.11)                                        |
| 1348.611938 | 50.7913513184,   | 1.35  | b12-98 (0.07)                                      |
| 1351.630005 | 47.7004241943,   | 1.27  |                                                    |
| 1359.707764 | 225.1877593994,  | 5.99  | b11 (0.21)                                         |
| 1360.835083 | 71.8572540283,   | 1.91  |                                                    |
| 1393.72876  | 54.4371261597,   | 1.44  | y12o (0.09)                                        |
| 1410.644043 | 56.7139434814,   | 1.51  |                                                    |
| 1411.824463 | 81.9980621338,   | 2.18  | y12 (0.18)                                         |
| 1412.826538 | 72.1448287964,   | 1.92  |                                                    |
| 1428.664307 | 74.1617889404,   | 1.97  | b12o (0.15)                                        |
| 1446.71936  | 50.8500862122,   | 1.35  | b12 (0.19)                                         |
| 1459.581299 | 128.6705627441,  | 3.42  |                                                    |
| 1461.751221 | 50.6204528809,   | 1.34  |                                                    |
| 1477.5802   | 249.7721252441,  | 6.65  | b13-98 (0.00)                                      |
| 1478.732422 | 261.9328308105,  | 6.97  |                                                    |



|             |                  |       |                          |
|-------------|------------------|-------|--------------------------|
| 1496.821655 | 46.6989631653,   | 1.24  |                          |
| 1523.58667  | 45.590473175,    | 1.21  |                          |
| 1539.719482 | 140.9043884277,  | 3.75  |                          |
| 1540.941528 | 51.4207229614,   | 1.36  | y13o (0.24)              |
| 1553.512085 | 86.9729003906,   | 2.31  |                          |
| 1557.725952 | 86.6851654053,   | 2.30  | b13o (0.17)              |
| 1558.836304 | 169.0384063721,  | 4.50  | b13* (0.29) : y13 (0.12) |
| 1575.590088 | 1005.0581665039, | 26.76 | b13 (0.02)               |
| 1576.577026 | 816.4624633789,  | 21.74 |                          |
| 1577.439697 | 94.6348114014,   | 2.52  |                          |

**S533**

# ProPhosSI MS/MS report

Mass: 509.991061 Charge: 4+

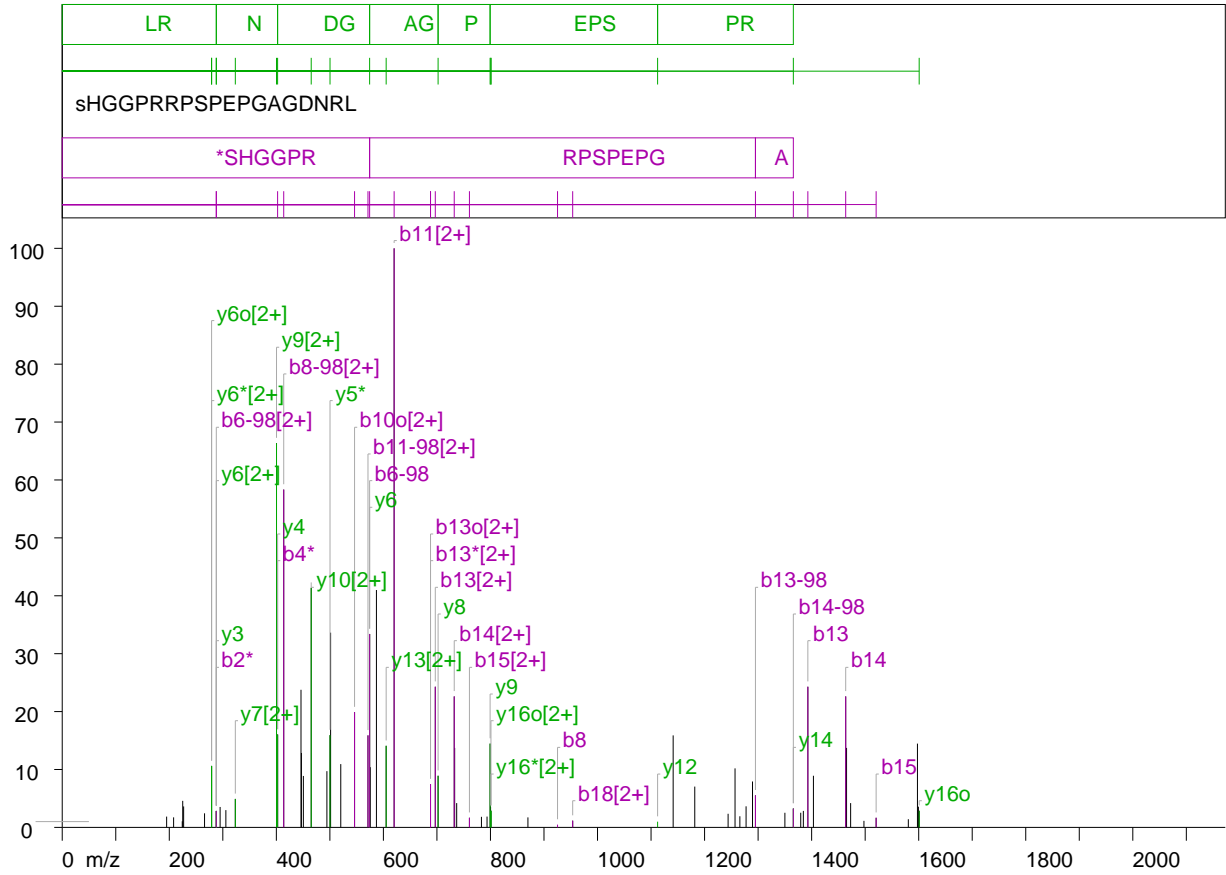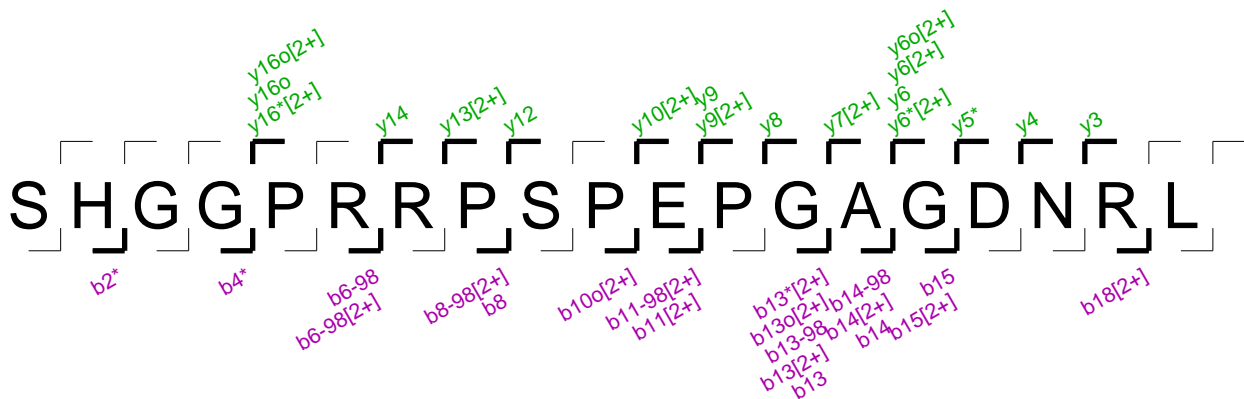

## Cav3.2 Rat

(22) 533 sHGPRRPSPEPGAGDNRL 551 2035.933 (-0.0008) Da

|                         |     |
|-------------------------|-----|
| Parent Ion              | m/z |
| No parent ions observed |     |

## Modifications and supporting evidence

| Position | Residue ID | Modification | Evidence             |
|----------|------------|--------------|----------------------|
| 1        | (533)      | Phospho (ST) | b6-98[2+], b8-98[2+] |

## Spectrum interpretation

| Rule                                   | passed/tests | Description                                                                                                                                                                                                                                                                                                                                                                                                                                                                                                                                                                                                                                                     |
|----------------------------------------|--------------|-----------------------------------------------------------------------------------------------------------------------------------------------------------------------------------------------------------------------------------------------------------------------------------------------------------------------------------------------------------------------------------------------------------------------------------------------------------------------------------------------------------------------------------------------------------------------------------------------------------------------------------------------------------------|
| Parent ions present                    | 0/1          | Parent ions corresponding to the parent fragment - 1 phosphate ions were not found                                                                                                                                                                                                                                                                                                                                                                                                                                                                                                                                                                              |
| Three -98 Ions present                 | 1/1          | 5 des-phospho fragment ions were found.                                                                                                                                                                                                                                                                                                                                                                                                                                                                                                                                                                                                                         |
| Unique -98 transitions present         | 0/1          | No transitions found to support unique phosphorylation at position 1<br><br/>                                                                                                                                                                                                                                                                                                                                                                                                                                                                                                                                                                                   |
| Four Sequential b or y ions            | 1/1          | Sequence of four y ions found from y6 to y9.                                                                                                                                                                                                                                                                                                                                                                                                                                                                                                                                                                                                                    |
| Five of six sequential ions present    | 1/1          | Five of Six ions found between y3 and y8<br>Five of Six ions found between y4 and y9<br>Five of Six ions found between y5 and y10<br>Five of Six ions found between y6 and y11<br>Five of Six ions found between y7 and y12<br>Five of Six ions found between y8 and y13<br>Five of Six ions found between y9 and y14                                                                                                                                                                                                                                                                                                                                           |
| Proline directed fragmentation pattern | 3/5          | NOTE: G-P is a low abundance fragmentation.<br>No proline ions at y16<br>No proline ions at b5-98<br/><br>PASS: y13> y12 with ratio 14.2<br/><br>FAIL: b8-98> b7-98<br/>NOTE: S-P is a low abundance fragmentation.<br>FAIL: y11< y10<br/>No proline ions at b10-98<br/><br>PASS: y9> y8 with ratio 7.44<br/><br>PASS: b12-98< b11-98<br/>                                                                                                                                                                                                                                                                                                                      |
| PhosphoTyrosine transition present     | 0/0          | 0 of 0 phosphotyrosine transitions were found.                                                                                                                                                                                                                                                                                                                                                                                                                                                                                                                                                                                                                  |
| Six of top ten ions identified         | 7/6          | ion 1 (mass: 620.036: intensity: 1089.37)<br>assigned 1 times<br>ion 2 (mass: 400.316: intensity: 722.85)<br>assigned 2 times<br>ion 3 (mass: 413.747: intensity: 635.55)<br>assigned 2 times<br>ion 4 (mass: 465.135: intensity: 450.84)<br>assigned 1 times<br>ion 5 (mass: 586.958: intensity: 446.59)<br>assigned 0 times<br>ion 6 (mass: 501.350: intensity: 366.38)<br>assigned 0 times<br>ion 7 (mass: 574.259: intensity: 363.87)<br>assigned 2 times<br>ion 8 (mass: 696.963: intensity: 264.64)<br>assigned 2 times<br>ion 9 (mass: 1392.919: intensity: 264.64)<br>assigned 1 times<br>ion 10 (mass: 446.064: intensity: 258.89)<br>assigned 0 times |

## Ion Table

35 ions assigned of 81 ions above threshold (43%).

### N-terminal ions

| AA | N-ion | b                                               | b*                            | b-98                                          | bo                            |
|----|-------|-------------------------------------------------|-------------------------------|-----------------------------------------------|-------------------------------|
| s  | 1     | 168.006                                         | 150.979                       | 70.020                                        | 149.995                       |
| H  | 2     | 305.065                                         | 288.038<br>*287.831 (2)       | 207.079                                       | 287.054                       |
| G  | 3     | 362.086                                         | 345.059                       | 264.100                                       | 344.075                       |
| G  | 4     | 419.108                                         | 402.081<br>*402.340 (16)      | 321.122                                       | 401.097                       |
| P  | 5     | 516.160                                         | 499.134                       | 418.174                                       | 498.150                       |
| R  | 6     | 672.261                                         | 655.235                       | 574.275<br>*574.259 (33)<br>*287.831 [2+] (2) | 654.251                       |
| R  | 7     | 828.363                                         | 811.336                       | 730.377                                       | 810.352                       |
| P  | 8     | 925.415<br>925.278 (0)                          | 908.389                       | 827.429<br>*413.747 [2+] (58)                 | 907.405                       |
| S  | 9     | 1012.447                                        | 995.421                       | 914.461                                       | 994.437                       |
| P  | 10    | 1109.500                                        | 1092.474                      | 1011.514                                      | 1091.490<br>546.111 [2+] (19) |
| E  | 11    | 1238.543<br>620.036 [2+] (100)                  | 1221.516                      | 1140.557<br>*571.163 [2+] (15)                | 1220.532                      |
| P  | 12    | 1335.595                                        | 1318.569                      | 1237.610                                      | 1317.585                      |
| G  | 13    | 1392.617<br>*696.963 [2+] (24)<br>1392.919 (24) | 1375.590<br>*688.036 [2+] (7) | 1294.631<br>1295.024 (5)                      | 1374.606<br>*688.036 [2+] (7) |
| A  | 14    | 1463.654<br>732.324 [2+] (22)<br>1463.642 (22)  | 1446.628                      | 1365.668<br>*1365.839 (3)                     | 1445.643                      |
| G  | 15    | 1520.676<br>1520.483 (1)<br>760.745 [2+] (1)    | 1503.649                      | 1422.690                                      | 1502.665                      |
| D  | 16    | 1635.702                                        | 1618.676                      | 1537.717                                      | 1617.692                      |
| N  | 17    | 1749.745                                        | 1732.719                      | 1651.759                                      | 1731.735                      |
| R  | 18    | 1905.847<br>953.606 [2+] (1)                    | 1888.820                      | 1807.861                                      | 1887.836                      |
| L  | 19    | 2018.931                                        | 2001.904                      | 1920.945                                      | 2000.920                      |
|    | 20    | -                                               | -                             | -                                             | -                             |

### C-terminal ions

| AA | C-ion | y                             | y*                            | yo                                            |
|----|-------|-------------------------------|-------------------------------|-----------------------------------------------|
| s  | 20    | -                             | -                             | -                                             |
| H  | 19    | 1869.943                      | 1852.916                      | 1851.932                                      |
| G  | 18    | 1732.884                      | 1715.857                      | 1714.873                                      |
| G  | 17    | 1675.862                      | 1658.836                      | 1657.852                                      |
| P  | 16    | 1618.841                      | 1601.814<br>*800.951 [2+] (2) | 1600.830<br>1600.894 (2)<br>*800.951 [2+] (2) |
| R  | 15    | 1521.788                      | 1504.762                      | 1503.778                                      |
| R  | 14    | 1365.687<br>*1365.839 (3)     | 1348.661                      | 1347.677                                      |
| P  | 13    | 1209.586<br>605.164 [2+] (14) | 1192.559                      | 1191.575                                      |
| S  | 12    | 1112.533<br>1112.254 (0)      | 1095.507                      | 1094.523                                      |

|   |    |                                               |                               |                               |
|---|----|-----------------------------------------------|-------------------------------|-------------------------------|
| P | 11 | 1025.501                                      | 1008.475                      | 1007.491                      |
| E | 10 | 928.448<br>465.135 [2+] (41)                  | 911.422                       | 910.438                       |
| P | 9  | 799.406<br>*400.316 [2+] (66)<br>799.349 (14) | 782.379                       | 781.395                       |
| G | 8  | 702.353<br>702.167 (8)                        | 685.326                       | 684.342                       |
| A | 7  | 645.332<br>323.366 [2+] (4)                   | 628.305                       | 627.321                       |
| G | 6  | 574.294<br>*574.259 (33)<br>*287.831 [2+] (2) | 557.268<br>*279.039 [2+] (10) | 556.284<br>*279.039 [2+] (10) |
| D | 5  | 517.273                                       | 500.246<br>*500.277 (15)      | 499.262                       |
| N | 4  | 402.246<br>*402.340 (16)                      | 385.219                       | 384.235                       |
| R | 3  | 288.203<br>*287.831 (2)                       | 271.177                       | 270.193                       |
| L | 2  | 132.102                                       | 115.075                       | 114.091                       |
|   | 1  | 19.018                                        | 1.991                         | 1.007                         |

### Ion distribution

| Threshold | Ion count | Matches | % matched |
|-----------|-----------|---------|-----------|
| 0         | 81        | 35      | 43        |
| 0.5       | 76        | 33      | 43        |
| 1         | 66        | 30      | 45        |
| 2         | 54        | 26      | 48        |
| 3         | 45        | 23      | 51        |
| 4         | 39        | 21      | 53        |
| 5         | 35        | 20      | 57        |
| 10        | 27        | 16      | 59        |

### Observed ions > 1%

| m/z     | Intensity           | % max | Assignment (delta)                                          |
|---------|---------------------|-------|-------------------------------------------------------------|
| 195.044 | 20.32 <sub>s</sub>  | 1.86  |                                                             |
| 208.080 | 18.91 <sub>s</sub>  | 1.73  |                                                             |
| 224.218 | 11.50 <sub>s</sub>  | 1.05  |                                                             |
| 225.093 | 49.95 <sub>s</sub>  | 4.58  |                                                             |
| 226.813 | 39.43 <sub>s</sub>  | 3.61  |                                                             |
| 265.868 | 26.49 <sub>s</sub>  | 2.43  |                                                             |
| 279.039 | 115.65 <sub>s</sub> | 10.61 | y6o[2+] (0.39) : y6*[2+] (-0.09) : z6[2+] (-0.09)           |
| 287.831 | 30.96 <sub>s</sub>  | 2.84  | b6-98[2+] (0.18) : y6[2+] (0.17) : b2* (-0.20) : y3 (-0.37) |
| 294.949 | 38.43 <sub>s</sub>  | 3.52  |                                                             |
| 305.701 | 32.50 <sub>s</sub>  | 2.98  |                                                             |
| 323.366 | 53.58 <sub>s</sub>  | 4.91  | y7[2+] (0.19)                                               |
| 400.316 | 722.85 <sub>s</sub> | 66.35 | y9[2+] (0.10) : a7[2+] (-0.37)                              |
| 402.340 | 174.73 <sub>s</sub> | 16.03 | b4* (0.25) : y4 (0.09)                                      |

|          |                      |       |                                                                  |
|----------|----------------------|-------|------------------------------------------------------------------|
| 413.747  | 635.55 <sub>3</sub>  | 58.34 | x9[2+] (-0.45) : b8-98[2+] (-0.47)                               |
| 446.064  | 258.89 <sub>3</sub>  | 23.76 |                                                                  |
| 446.858  | 140.01 <sub>3</sub>  | 12.85 |                                                                  |
| 450.515  | 96.78 <sub>3</sub>   | 8.88  |                                                                  |
| 465.135  | 450.84 <sub>3</sub>  | 41.38 | y10[2+] (0.40)                                                   |
| 494.443  | 105.80 <sub>3</sub>  | 9.71  |                                                                  |
| 500.277  | 173.52 <sub>3</sub>  | 15.92 | y5* (0.03) : z5 (0.03)                                           |
| 501.350  | 366.38 <sub>3</sub>  | 33.63 |                                                                  |
| 520.375  | 119.09 <sub>3</sub>  | 10.93 |                                                                  |
| 546.111  | 216.76 <sub>3</sub>  | 19.89 | b10o[2+] (-0.13)                                                 |
| 571.163  | 173.09 <sub>3</sub>  | 15.88 | x12[2+] (0.39) : b11-98[2+] (0.38)                               |
| 574.259  | 363.87 <sub>3</sub>  | 33.40 | b6-98 (-0.01) : y6 (-0.03)                                       |
| 575.521  | 113.29 <sub>3</sub>  | 10.39 |                                                                  |
| 586.958  | 446.59 <sub>3</sub>  | 40.99 |                                                                  |
| 605.164  | 153.52 <sub>3</sub>  | 14.09 | y13[2+] (-0.13)                                                  |
| 620.036  | 1089.37 <sub>3</sub> | 100   | b11[2+] (0.26)                                                   |
| 688.036  | 81.63 <sub>3</sub>   | 7.49  | b13o[2+] (0.22) : b13*[2+] (-0.26)                               |
| 696.963  | 264.64 <sub>3</sub>  | 24.29 | b13[2+] (0.15) : x14[2+] (-0.38)                                 |
| 702.167  | 97.15 <sub>3</sub>   | 8.91  | y8 (-0.18)                                                       |
| 732.324  | 246.41 <sub>3</sub>  | 22.61 | b14[2+] (-0.00)                                                  |
| 733.126  | 149.53 <sub>3</sub>  | 13.72 |                                                                  |
| 736.925  | 45.71 <sub>3</sub>   | 4.19  |                                                                  |
| 760.745  | 18.12 <sub>3</sub>   | 1.66  | b15[2+] (-0.09)                                                  |
| 783.158  | 19.90 <sub>3</sub>   | 1.82  | a7* (-0.18)                                                      |
| 793.629  | 20.35 <sub>3</sub>   | 1.86  |                                                                  |
| 799.349  | 157.63 <sub>3</sub>  | 14.46 | y9 (-0.05)                                                       |
| 800.239  | 39.01 <sub>3</sub>   | 3.58  | a7 (-0.12)                                                       |
| 800.951  | 31.28 <sub>3</sub>   | 2.87  | a7 (0.58) : y16o[2+] (0.03) : y16*[2+] (-0.46) : z16[2+] (-0.46) |
| 869.992  | 18.84 <sub>3</sub>   | 1.72  |                                                                  |
| 953.606  | 12.68 <sub>3</sub>   | 1.16  | b18[2+] (0.17)                                                   |
| 1141.319 | 173.09 <sub>3</sub>  | 15.88 |                                                                  |
| 1181.673 | 76.77 <sub>3</sub>   | 7.04  |                                                                  |
| 1243.935 | 25.63 <sub>3</sub>   | 2.35  |                                                                  |
| 1256.885 | 111.04 <sub>3</sub>  | 10.19 |                                                                  |
| 1265.934 | 20.93 <sub>3</sub>   | 1.92  |                                                                  |
| 1277.556 | 39.66 <sub>3</sub>   | 3.64  |                                                                  |
| 1289.532 | 86.38 <sub>3</sub>   | 7.92  | a12o (-0.05)                                                     |
| 1295.024 | 60.29 <sub>3</sub>   | 5.53  | b13-98 (0.39)                                                    |
| 1350.013 | 27.52 <sub>3</sub>   | 2.52  |                                                                  |
| 1365.839 | 35.49 <sub>3</sub>   | 3.25  | b14-98 (0.17) : y14 (0.15)                                       |
| 1379.647 | 27.59 <sub>3</sub>   | 2.53  |                                                                  |
| 1384.522 | 31.01 <sub>3</sub>   | 2.84  |                                                                  |
| 1392.919 | 264.64 <sub>3</sub>  | 24.29 | b13 (0.30)                                                       |

|          |                     |       |             |
|----------|---------------------|-------|-------------|
| 1403.327 | 97.15 <sub>3</sub>  | 8.91  |             |
| 1463.642 | 246.41 <sub>3</sub> | 22.61 | b14 (-0.01) |
| 1465.244 | 149.53 <sub>3</sub> | 13.72 |             |
| 1472.844 | 45.71 <sub>3</sub>  | 4.19  |             |
| 1497.714 | 12.32 <sub>3</sub>  | 1.13  |             |
| 1520.483 | 18.12 <sub>3</sub>  | 1.66  | b15 (-0.19) |
| 1580.636 | 15.39 <sub>3</sub>  | 1.41  |             |
| 1597.691 | 157.63 <sub>3</sub> | 14.46 |             |
| 1599.470 | 39.01 <sub>3</sub>  | 3.58  |             |
| 1600.894 | 31.28 <sub>3</sub>  | 2.87  | y16o (0.06) |



S541

# ProPhosSI MS/MS report

Mass: 509.990904 Charge: 4+

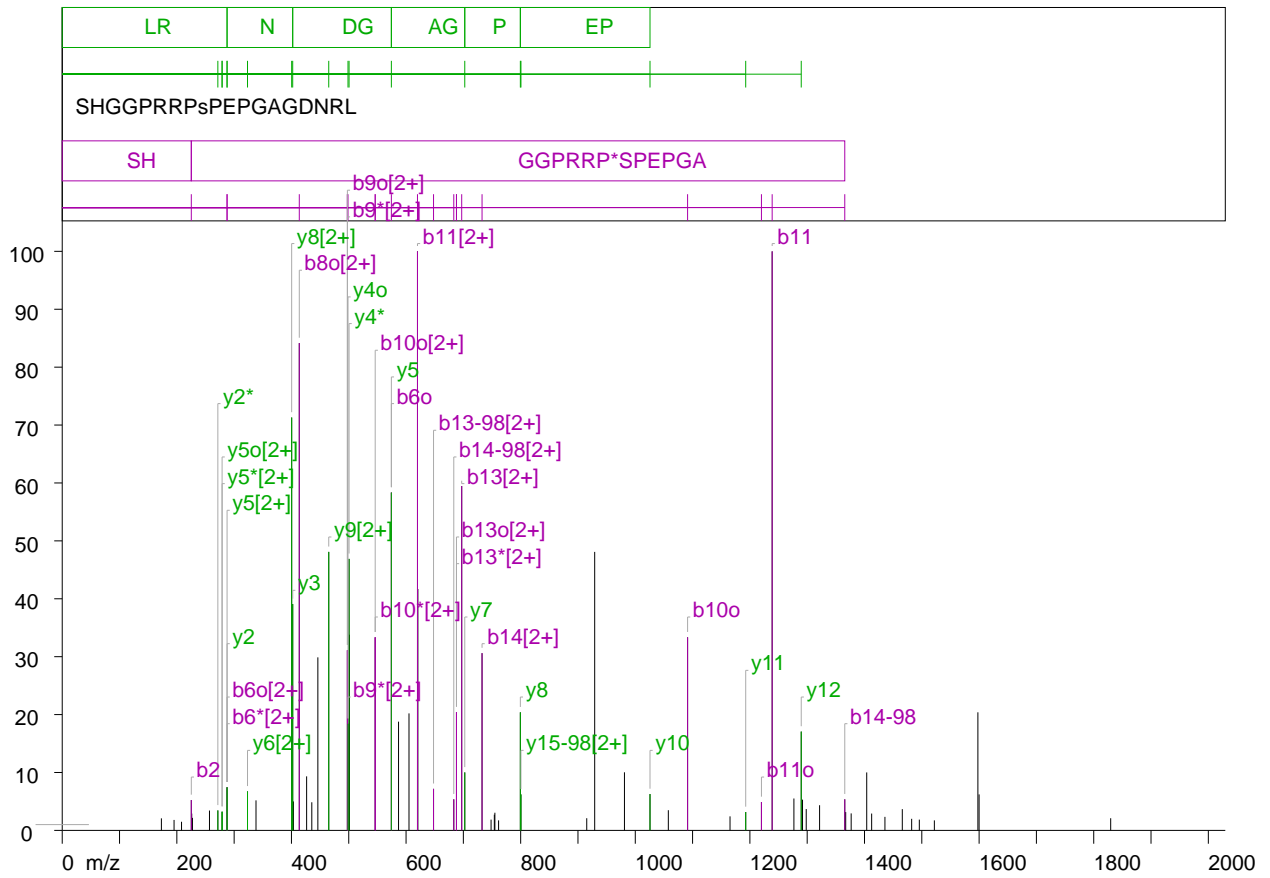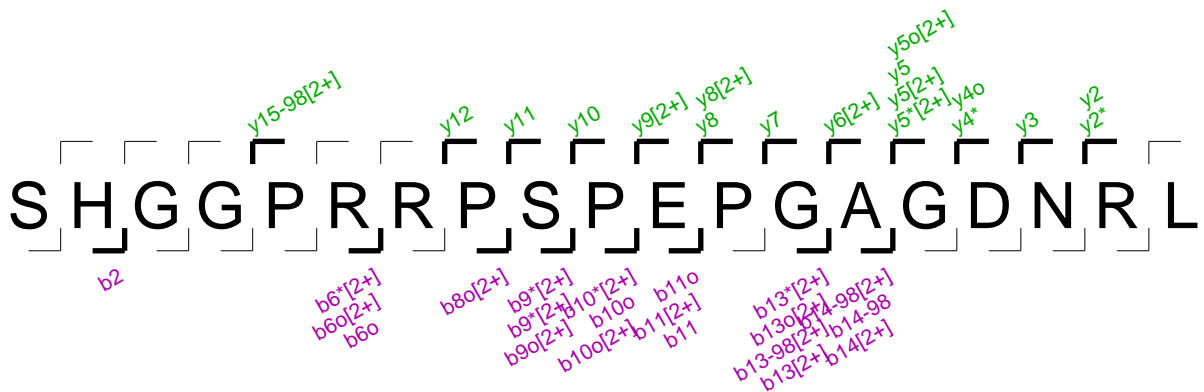

## Cav3.2 Rat

(37) 533 SHGGPRRPsPEPGAGDNRL 551 2035.933 (-0.0015) Da

|                         |     |
|-------------------------|-----|
| Parent Ion              | m/z |
| No parent ions observed |     |

### Modifications and supporting evidence

| Position | Residue ID | Modification | Evidence                                                        |
|----------|------------|--------------|-----------------------------------------------------------------|
| 9        | (541)      | Phospho (ST) | presence of b2, y11, y12 exclude a phosphorylation on position1 |

### Spectrum interpretation

| Rule                                   | passed/tests | Description                                                                                                                                                                                                                                                                                                                                                                                                                                                                                                                                                                                                                                                        |
|----------------------------------------|--------------|--------------------------------------------------------------------------------------------------------------------------------------------------------------------------------------------------------------------------------------------------------------------------------------------------------------------------------------------------------------------------------------------------------------------------------------------------------------------------------------------------------------------------------------------------------------------------------------------------------------------------------------------------------------------|
| Parent ions present                    | 0/1          | Parent ions corresponding to the parent fragment - 1 phosphate ions were not found                                                                                                                                                                                                                                                                                                                                                                                                                                                                                                                                                                                 |
| Three -98 Ions present                 | 1/1          | 3 des-phospho fragment ions were found.                                                                                                                                                                                                                                                                                                                                                                                                                                                                                                                                                                                                                            |
| Unique -98 transitions present         | 1/1          | transition b2 to b13-98[2+], transition y10 to y15-98[2+] support unique phosphorylation at position 9 <br/>                                                                                                                                                                                                                                                                                                                                                                                                                                                                                                                                                       |
| Four Sequential b or y ions            | 1/1          | Sequence of four y ions found from y5 to y8.                                                                                                                                                                                                                                                                                                                                                                                                                                                                                                                                                                                                                       |
| Five of six sequential ions present    | 1/1          | Five of Six ions found between y2 and y7<br>Five of Six ions found between y3 and y8<br>Five of Six ions found between y4 and y9<br>Five of Six ions found between y5 and y10<br>Five of Six ions found between y6 and y11                                                                                                                                                                                                                                                                                                                                                                                                                                         |
| Proline directed fragmentation pattern | 2/3          | NOTE: G-P is a low abundance fragmentation.<br>PASS: y15-98> y14-98<br/><br>No proline ions at b5<br/><br>No proline ions at y12-98<br>No proline ions at b8<br/><br>NOTE: S-P is a low abundance fragmentation.<br>FAIL: y10< y9<br/>No proline ions at b10-98<br/><br>PASS: y8> y7 with ratio 7.12<br/><br>No proline ions at b12-98<br/>                                                                                                                                                                                                                                                                                                                        |
| PhosphoTyrosine transition present     | 0/0          | 0 of 0 phosphotyrosine transitions were found.                                                                                                                                                                                                                                                                                                                                                                                                                                                                                                                                                                                                                     |
| Six of top ten ions identified         | 8/6          | ion 1 (mass: 619.937: intensity: 1487.50)<br>assigned 1 times<br>ion 2 (mass: 1238.867: intensity: 1487.50)<br>assigned 1 times<br>ion 3 (mass: 413.698: intensity: 1251.86)<br>assigned 2 times<br>ion 4 (mass: 400.380: intensity: 1060.59)<br>assigned 3 times<br>ion 5 (mass: 697.071: intensity: 884.56)<br>assigned 1 times<br>ion 6 (mass: 574.343: intensity: 867.91)<br>assigned 2 times<br>ion 7 (mass: 929.160: intensity: 715.48)<br>assigned 0 times<br>ion 8 (mass: 465.084: intensity: 715.48)<br>assigned 1 times<br>ion 9 (mass: 500.518: intensity: 697.49)<br>assigned 2 times<br>ion 10 (mass: 620.604: intensity: 620.04)<br>assigned 0 times |

### Ion Table

32 ions assigned of 64 ions above threshold (50%).

## N-terminal ions

| AA | N-ion | b                                                | b*                                                  | b-98                                          | bo                                              |
|----|-------|--------------------------------------------------|-----------------------------------------------------|-----------------------------------------------|-------------------------------------------------|
| S  | 1     | 88.039                                           | 71.013                                              | -                                             | 70.029                                          |
| H  | 2     | 225.098<br>225.238 (5)                           | 208.072                                             | -                                             | 207.088                                         |
| G  | 3     | 282.120                                          | 265.093                                             | -                                             | 264.109                                         |
| G  | 4     | 339.141                                          | 322.115                                             | -                                             | 321.131                                         |
| P  | 5     | 436.194                                          | 419.167                                             | -                                             | 418.183                                         |
| R  | 6     | 592.295                                          | 575.269<br>*287.652 [2+] (7)                        | -                                             | 574.285<br>*287.652 [2+] (7)<br>*574.343 (58)   |
| R  | 7     | 748.396                                          | 731.370                                             | -                                             | 730.386                                         |
| P  | 8     | 845.449                                          | 828.422                                             | -                                             | 827.438<br>*413.698 [2+] (84)                   |
| s  | 9     | 1012.447                                         | 995.421<br>*498.684 [2+] (18)<br>*497.624 [2+] (31) | 914.461                                       | 994.437<br>*497.624 [2+] (31)                   |
| P  | 10    | 1109.500                                         | 1092.474<br>*546.150 [2+] (33)                      | 1011.514                                      | 1091.490<br>1091.292 (33)<br>*546.150 [2+] (33) |
| E  | 11    | 1238.543<br>619.937 [2+] (100)<br>1238.867 (100) | 1221.516                                            | 1140.557                                      | 1220.532<br>*1220.133 (4)                       |
| P  | 12    | 1335.595                                         | 1318.569                                            | 1237.610                                      | 1317.585                                        |
| G  | 13    | 1392.617<br>697.071 [2+] (59)                    | 1375.590<br>*687.962 [2+] (20)                      | 1294.631<br>647.928 [2+] (7)                  | 1374.606<br>*687.962 [2+] (20)                  |
| A  | 14    | 1463.654<br>732.605 [2+] (30)                    | 1446.628                                            | 1365.668<br>*683.288 [2+] (5)<br>1365.569 (5) | 1445.643                                        |
| G  | 15    | 1520.676                                         | 1503.649                                            | 1422.690                                      | 1502.665                                        |
| D  | 16    | 1635.702                                         | 1618.676                                            | 1537.717                                      | 1617.692                                        |
| N  | 17    | 1749.745                                         | 1732.719                                            | 1651.759                                      | 1731.735                                        |
| R  | 18    | 1905.847                                         | 1888.820                                            | 1807.861                                      | 1887.836                                        |
| L  | 19    | -                                                | -                                                   | -                                             | -                                               |

## C-terminal ions

| AA | C-ion | y                            | y*       | y-98                          | yo       |
|----|-------|------------------------------|----------|-------------------------------|----------|
| S  | 19    | -                            | -        | -                             | -        |
| H  | 18    | 1949.909                     | 1932.883 | 1851.923                      | 1931.899 |
| G  | 17    | 1812.850                     | 1795.824 | 1714.864                      | 1794.840 |
| G  | 16    | 1755.829                     | 1738.802 | 1657.843                      | 1737.818 |
| P  | 15    | 1698.807                     | 1681.781 | 1600.821<br>*800.485 [2+] (6) | 1680.797 |
| R  | 14    | 1601.754                     | 1584.728 | 1503.769                      | 1583.744 |
| R  | 13    | 1445.653                     | 1428.627 | 1347.667                      | 1427.643 |
| P  | 12    | 1289.552<br>*1289.619 (17)   | 1272.526 | 1191.566                      | 1271.542 |
| s  | 11    | 1192.499<br>*1192.688 (3)    | 1175.473 | 1094.514                      | 1174.489 |
| P  | 10    | 1025.501<br>1025.696 (6)     | 1008.475 | -                             | 1007.491 |
| E  | 9     | 928.448<br>465.084 [2+] (48) | 911.422  | -                             | 910.438  |
| P  | 8     | 799.406<br>*799.428 (20)     | 782.379  | -                             | 781.395  |

|   |   |                                               |                              |   |                              |
|---|---|-----------------------------------------------|------------------------------|---|------------------------------|
| - | - | *400.380 [2+] (71)                            | -                            | - | -                            |
| G | 7 | 702.353<br>*702.432 (10)                      | 685.326                      | - | 684.342                      |
| A | 6 | 645.332<br>323.318 [2+] (6)                   | 628.305                      | - | 627.321                      |
| G | 5 | 574.294<br>*287.652 [2+] (7)<br>*574.343 (58) | 557.268<br>*278.979 [2+] (3) | - | 556.284<br>*278.979 [2+] (3) |
| D | 4 | 517.273                                       | 500.246<br>*500.518 (46)     | - | 499.262<br>*498.684 (18)     |
| N | 3 | 402.246<br>402.204 (39)                       | 385.219                      | - | 384.235                      |
| R | 2 | 288.203<br>*287.652 (7)                       | 271.177<br>*271.563 (3)      | - | 270.193                      |
| L | 1 | 132.102                                       | 115.075                      | - | 114.091                      |

### Ion distribution

| Threshold | Ion count | Matches | % matched |
|-----------|-----------|---------|-----------|
| 0         | 96        | 42      | 43        |
| 0.5       | 86        | 40      | 46        |
| 1         | 70        | 35      | 50        |
| 2         | 63        | 32      | 50        |
| 3         | 53        | 30      | 56        |
| 4         | 44        | 27      | 61        |
| 5         | 40        | 26      | 65        |
| 10        | 27        | 18      | 66        |

### Observed ions > 1%

| m/z     | Intensity            | % max | Assignment (delta)                                            |
|---------|----------------------|-------|---------------------------------------------------------------|
| 173.048 | 30.96 <sub>s</sub>   | 2.08  |                                                               |
| 195.142 | 26.90 <sub>s</sub>   | 1.80  | a5o[2+] (-0.45)                                               |
| 208.192 | 22.19 <sub>s</sub>   | 1.49  | b2* (0.11)                                                    |
| 225.238 | 78.05 <sub>s</sub>   | 5.24  | b2 (0.13)                                                     |
| 226.008 | 43.22 <sub>s</sub>   | 2.90  |                                                               |
| 227.211 | 32.21 <sub>s</sub>   | 2.16  | c5[2+] (0.09)                                                 |
| 256.955 | 51.00 <sub>s</sub>   | 3.42  |                                                               |
| 271.563 | 51.30 <sub>s</sub>   | 3.44  | y2* (0.38) : z2 (0.38)                                        |
| 278.979 | 48.02 <sub>s</sub>   | 3.22  | y5o[2+] (0.33) : y5*[2+] (-0.15) : z5[2+] (-0.15)             |
| 287.652 | 110.68 <sub>s</sub>  | 7.44  | b6o[2+] (0.00) : y5[2+] (0.00) : b6*[2+] (-0.48) : y2 (-0.55) |
| 323.318 | 100.20 <sub>s</sub>  | 6.73  | y6[2+] (0.14)                                                 |
| 338.148 | 77.15 <sub>s</sub>   | 5.18  |                                                               |
| 400.380 | 1060.59 <sub>s</sub> | 71.30 | y8[2+] (0.17) : a8o[2+] (0.15) : a8*[2+] (-0.33)              |
| 402.204 | 581.48 <sub>s</sub>  | 39.09 | y3 (-0.04)                                                    |
| 403.400 | 74.40 <sub>s</sub>   | 5.00  |                                                               |
| 413.698 | 1251.86 <sub>s</sub> | 84.15 | x8[2+] (-0.50) : b8o[2+] (-0.52)                              |
| 426.507 | 138.82 <sub>s</sub>  | 9.33  |                                                               |

|          |                      |       |                                                   |
|----------|----------------------|-------|---------------------------------------------------|
| 435.522  | 72.26 <sub>s</sub>   | 4.85  |                                                   |
| 446.060  | 444.53 <sub>s</sub>  | 29.88 |                                                   |
| 465.084  | 715.48 <sub>s</sub>  | 48.09 | y9[2+] (0.35)                                     |
| 497.624  | 462.86 <sub>s</sub>  | 31.11 | b9o[2+] (-0.09) : b9*[2+] (-0.59)                 |
| 498.684  | 273.92 <sub>s</sub>  | 18.41 | b9*[2+] (0.46) : y4o (-0.57)                      |
| 500.518  | 697.49 <sub>s</sub>  | 46.89 | y4* (0.27) : z4 (0.27)                            |
| 501.287  | 502.69 <sub>s</sub>  | 33.79 |                                                   |
| 546.150  | 496.02 <sub>s</sub>  | 33.34 | b10o[2+] (-0.09) : a6o (-0.14) : b10*[2+] (-0.59) |
| 574.343  | 867.91 <sub>s</sub>  | 58.34 | b6o (0.05) : y5 (0.04)                            |
| 586.852  | 279.35 <sub>s</sub>  | 18.77 |                                                   |
| 605.124  | 300.58 <sub>s</sub>  | 20.20 |                                                   |
| 619.937  | 1487.50 <sub>s</sub> | 100   | b11[2+] (0.16)                                    |
| 620.604  | 620.04 <sub>s</sub>  | 41.68 |                                                   |
| 647.928  | 106.71 <sub>s</sub>  | 7.17  | b13-98[2+] (0.10)                                 |
| 683.288  | 79.85 <sub>s</sub>   | 5.36  | a13[2+] (0.47) : b14-98[2+] (-0.05)               |
| 687.962  | 304.09 <sub>s</sub>  | 20.44 | b13o[2+] (0.15) : b13*[2+] (-0.33)                |
| 697.071  | 884.56 <sub>s</sub>  | 59.46 | b13[2+] (0.25)                                    |
| 702.432  | 148.92 <sub>s</sub>  | 10.01 | y7 (0.07) : a7o (0.04)                            |
| 732.605  | 455.35 <sub>s</sub>  | 30.61 | b14[2+] (0.27)                                    |
| 748.337  | 27.72 <sub>s</sub>   | 1.86  | b7 (-0.05)                                        |
| 753.995  | 40.40 <sub>s</sub>   | 2.71  |                                                   |
| 755.006  | 45.42 <sub>s</sub>   | 3.05  |                                                   |
| 761.457  | 25.75 <sub>s</sub>   | 1.73  |                                                   |
| 799.428  | 303.37 <sub>s</sub>  | 20.39 | y8 (0.02) : a8o (-0.01)                           |
| 800.485  | 92.45 <sub>s</sub>   | 6.21  | a8* (0.05) : y15-98[2+] (-0.42)                   |
| 915.313  | 31.26 <sub>s</sub>   | 2.10  |                                                   |
| 929.160  | 715.48 <sub>s</sub>  | 48.09 |                                                   |
| 981.120  | 149.25 <sub>s</sub>  | 10.03 |                                                   |
| 1025.696 | 93.38 <sub>s</sub>   | 6.27  | y10 (0.19)                                        |
| 1057.682 | 51.85 <sub>s</sub>   | 3.48  |                                                   |
| 1091.292 | 496.02 <sub>s</sub>  | 33.34 | b10o (-0.19)                                      |
| 1165.348 | 36.08 <sub>s</sub>   | 2.42  |                                                   |
| 1192.688 | 47.21 <sub>s</sub>   | 3.17  | y11 (0.18) : a11o (0.15)                          |
| 1220.133 | 72.89 <sub>s</sub>   | 4.90  | x11 (-0.36) : b11o (-0.39)                        |
| 1238.867 | 1487.50 <sub>s</sub> | 100   | b11 (0.32)                                        |
| 1276.813 | 81.94 <sub>s</sub>   | 5.50  |                                                   |
| 1289.619 | 253.88 <sub>s</sub>  | 17.06 | y12 (0.06) : a12o (0.02)                          |
| 1291.850 | 78.99 <sub>s</sub>   | 5.31  |                                                   |
| 1298.301 | 54.84 <sub>s</sub>   | 3.68  |                                                   |
| 1321.620 | 64.67 <sub>s</sub>   | 4.34  |                                                   |
| 1365.569 | 79.85 <sub>s</sub>   | 5.36  | b14-98 (-0.09)                                    |
| 1367.179 | 47.07 <sub>s</sub>   | 3.16  |                                                   |
| 1376.752 | 43.66 <sub>s</sub>   | 2.93  |                                                   |

|          |         |       |            |
|----------|---------|-------|------------|
| 1403.857 | 148.92, | 10.01 |            |
| 1412.495 | 43.28,  | 2.90  |            |
| 1435.663 | 34.79,  | 2.33  | a14 (0.00) |
| 1465.961 | 54.60,  | 3.67  |            |
| 1482.285 | 29.77,  | 2.00  |            |
| 1495.667 | 27.72,  | 1.86  |            |
| 1521.907 | 25.75,  | 1.73  |            |
| 1597.849 | 303.37, | 20.39 |            |
| 1599.963 | 92.45,  | 6.21  |            |
| 1829.618 | 31.26,  | 2.10  |            |

S559

or

S562



# ProPhosSI MS/MS report

Mass: 985.424194335938 Charge: 4+

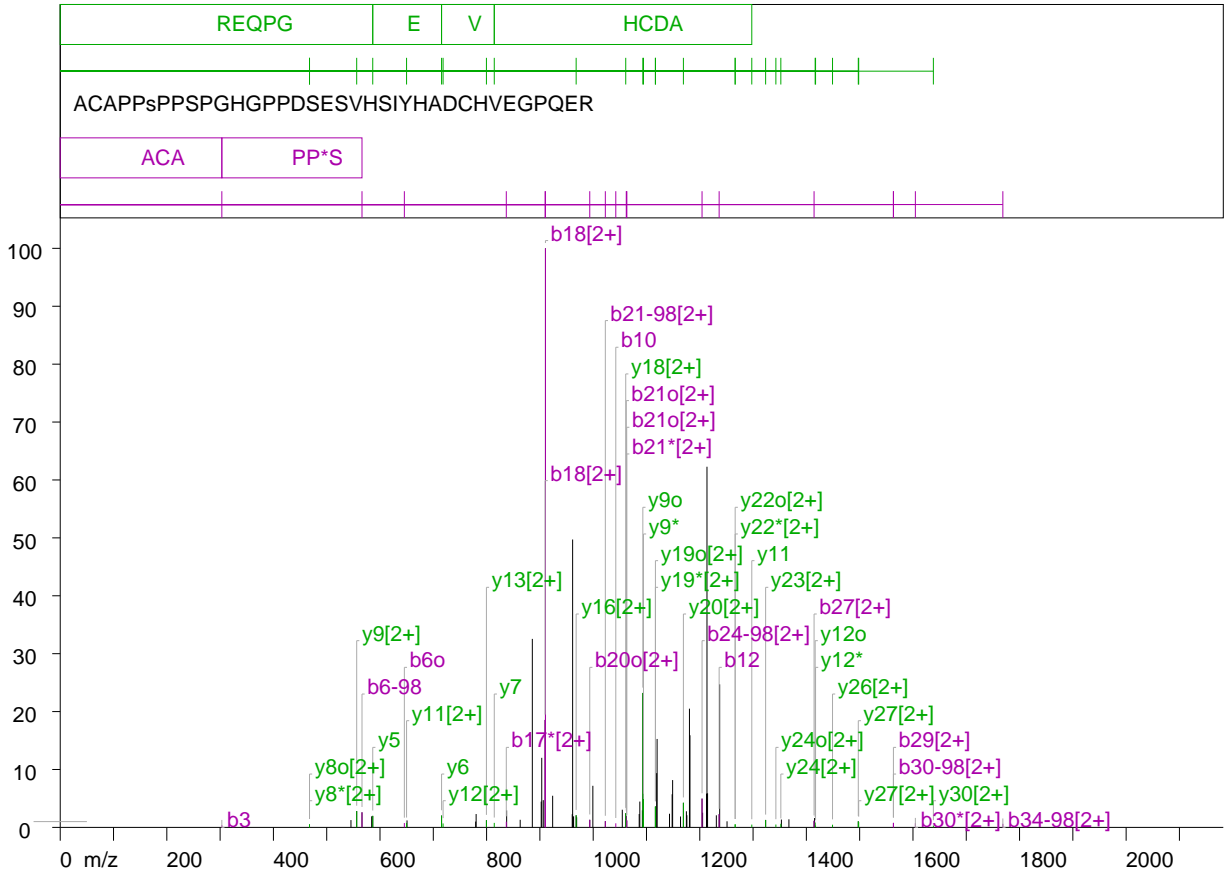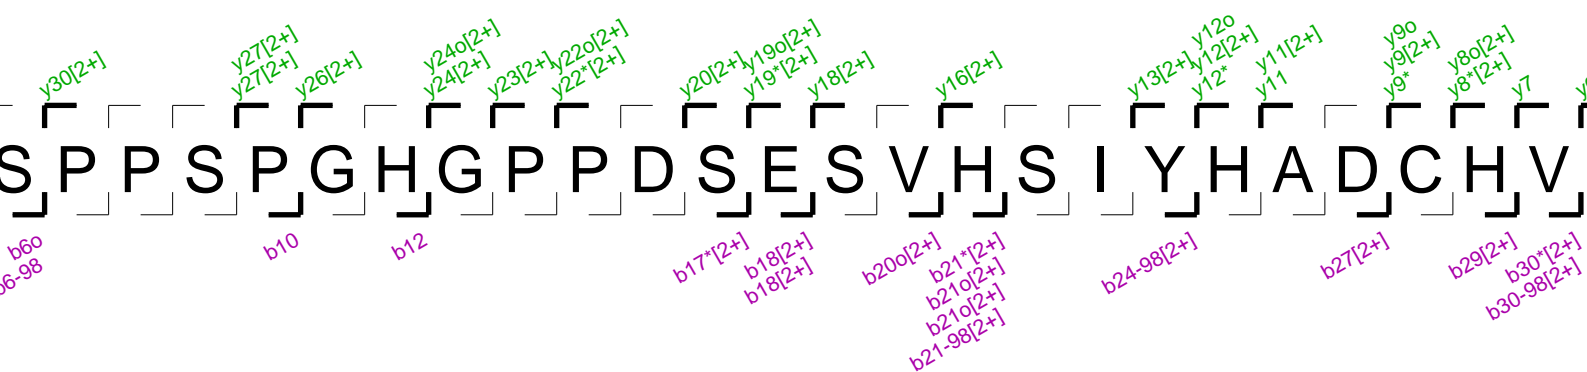

## Cav3.2 Rat

(19) 554 ACAPP<sub>5</sub>PP<sub>5</sub>PGHGPPDSESVHSIYHADCHVEGPQR 589 3937.657 (0.0079) Da

|                         |     |
|-------------------------|-----|
| Parent Ion              | m/z |
| No parent ions observed |     |

### Modifications and supporting evidence

| Position | Residue ID   | Modification | Evidence                                                                    |
|----------|--------------|--------------|-----------------------------------------------------------------------------|
| 6 or 9   | (559) or 562 | Phospho (ST) | all the y ions from y20 to y27 exclude a phosphorylation on other positions |

### Spectrum interpretation

| Rule                                   | passed/tests | Description                                                                                                                                                                                                                                                                                                                                                                                                                                                                                                                                                                                                                                                                                                                                                                                                              |
|----------------------------------------|--------------|--------------------------------------------------------------------------------------------------------------------------------------------------------------------------------------------------------------------------------------------------------------------------------------------------------------------------------------------------------------------------------------------------------------------------------------------------------------------------------------------------------------------------------------------------------------------------------------------------------------------------------------------------------------------------------------------------------------------------------------------------------------------------------------------------------------------------|
| Parent ions present                    | 0/1          | Parent ions corresponding to the parent fragment - 1 phosphate ions were not found                                                                                                                                                                                                                                                                                                                                                                                                                                                                                                                                                                                                                                                                                                                                       |
| Three -98 Ions present                 | 1/1          | 5 des-phospho fragment ions were found.                                                                                                                                                                                                                                                                                                                                                                                                                                                                                                                                                                                                                                                                                                                                                                                  |
| Unique -98 transitions present         | 1/1          | transition b3 to b6-98 not considered because the mass of b6-98 could correspond to the mass of b6° non phosphorylated.                                                                                                                                                                                                                                                                                                                                                                                                                                                                                                                                                                                                                                                                                                  |
| Four Sequential b or y ions            | 0/1          | Sequence of four y or b ions not observed                                                                                                                                                                                                                                                                                                                                                                                                                                                                                                                                                                                                                                                                                                                                                                                |
| Five of six sequential ions present    | 0/1          |                                                                                                                                                                                                                                                                                                                                                                                                                                                                                                                                                                                                                                                                                                                                                                                                                          |
| Proline directed fragmentation pattern | 5/5          | No proline ions at y33-98<br>PASS: b4< b3<br/><br>NOTE: P-P is a low abundance fragmentation.<br>No proline ions at y32-98<br>No proline ions at b5<br/><br>NOTE: S-P is a low abundance fragmentation.<br>PASS: y30> y29<br/><br>PASS: b7-98< b6-98<br/><br>NOTE: P-P is a low abundance fragmentation.<br>No proline ions at y29<br>No proline ions at b8-98<br/><br>NOTE: S-P is a low abundance fragmentation.<br>PASS: y27> y26 with ratio 2.27<br/><br>No proline ions at b10-98<br/><br>NOTE: G-P is a low abundance fragmentation.<br>PASS: y23> y22<br/><br>No proline ions at b14-98<br/><br>NOTE: P-P is a low abundance fragmentation.<br>No proline ions at y22<br>No proline ions at b15-98<br/><br>NOTE: G-P is a low abundance fragmentation.<br>No proline ions at y4<br>No proline ions at b33-98<br/> |
| PhosphoTyrosine transition present     | 0/0          | 0 of 0 phosphotyrosine transitions were found.                                                                                                                                                                                                                                                                                                                                                                                                                                                                                                                                                                                                                                                                                                                                                                           |
| Six of top ten ions identified         | 4/6          | ion 1 (mass: 910.4383545: intensity: 94351.7734375) assigned 1 times<br>ion 2 (mass: 1213.534912: intensity: 58768.3984375) assigned 0 times<br>ion 3 (mass: 961.4415894: intensity: 46910.39453125) assigned 1 times<br>ion 4 (mass: 885.8071289: intensity: 30716.29296875) assigned 0 times<br>ion 5 (mass: 1237.360229: intensity: 23310.91796875) assigned 0 times<br>ion 6 (mass: 1093.168701: intensity: 21908.361328125) assigned 1 times<br>ion 7 (mass: 1180.652588: intensity: 19345.45703125) assigned 0 times<br>ion 8 (mass: 909.7832642: intensity: 17507.025390625) assigned 1 times<br>ion 9 (mass: 1181.585571: intensity: 15012.19140625) assigned 0 times<br>ion 10 (mass: 1119.945557: intensity: 14411.041015625) assigned 0 times                                                                 |

## Ion Table

56 ions assigned of 132 ions above threshold (42%).

N-terminal ions

| AA | N-ion | b                                                           | b*                                | b-98                             | bo                                                        |
|----|-------|-------------------------------------------------------------|-----------------------------------|----------------------------------|-----------------------------------------------------------|
| A  | 1     | 72.044                                                      | 55.018                            | -                                | 54.034                                                    |
| C  | 2     | 232.075                                                     | 215.049                           | -                                | 214.065                                                   |
| A  | 3     | 303.112<br>303.241272 (0)                                   | 286.086                           | -                                | 285.102                                                   |
| P  | 4     | 400.165                                                     | 383.138                           | -                                | 382.154                                                   |
| P  | 5     | 497.218                                                     | 480.191                           | -                                | 479.207                                                   |
| s  | 6     | 664.216                                                     | 647.190                           | 566.230<br>566.2172241 (2)       | 646.206<br>645.6709595 (0)                                |
| P  | 7     | 761.269                                                     | 744.242                           | 663.283                          | 743.258                                                   |
| P  | 8     | 858.322                                                     | 841.295                           | 760.336                          | 840.311                                                   |
| S  | 9     | 945.354                                                     | 928.327                           | 847.368                          | 927.343                                                   |
| P  | 10    | 1042.406<br>1042.434448 (0)                                 | 1025.380                          | 944.421                          | 1024.396                                                  |
| G  | 11    | 1099.428                                                    | 1082.401                          | 1001.442                         | 1081.417                                                  |
| H  | 12    | 1236.487<br>1236.358643 (2)                                 | 1219.460                          | 1138.501                         | 1218.476                                                  |
| G  | 13    | 1293.508                                                    | 1276.482                          | 1195.522                         | 1275.498                                                  |
| P  | 14    | 1390.561                                                    | 1373.534                          | 1292.575                         | 1372.550                                                  |
| P  | 15    | 1487.614                                                    | 1470.587                          | 1389.628                         | 1469.603                                                  |
| D  | 16    | 1602.641                                                    | 1585.614                          | 1504.655                         | 1584.630                                                  |
| S  | 17    | 1689.673                                                    | 1672.646<br>836.9517212 [2+] (0)  | 1591.687                         | 1671.662                                                  |
| E  | 18    | 1818.715<br>910.4383545 [2+] (100)<br>909.7832642 [2+] (18) | 1801.689                          | 1720.729                         | 1800.705                                                  |
| S  | 19    | 1905.747                                                    | 1888.721                          | 1807.762                         | 1887.737                                                  |
| V  | 20    | 2004.816                                                    | 1987.789                          | 1906.830                         | 1986.805<br>993.5709229 [2+] (1)                          |
| H  | 21    | 2141.875                                                    | 2124.848<br>*1062.855225 [2+] (1) | 2043.889<br>1022.79364 [2+] (1)  | 2123.864<br>1062.075806 [2+] (1)<br>*1062.855225 [2+] (1) |
| S  | 22    | 2228.907                                                    | 2211.880                          | 2130.921                         | 2210.896                                                  |
| I  | 23    | 2341.991                                                    | 2324.964                          | 2244.005                         | 2323.980                                                  |
| Y  | 24    | 2505.054                                                    | 2488.028                          | 2407.068<br>1204.275635 [2+] (4) | 2487.044                                                  |
| H  | 25    | 2642.113                                                    | 2625.087                          | 2544.127                         | 2624.103                                                  |
| A  | 26    | 2713.150                                                    | 2696.124                          | 2615.164                         | 2695.140                                                  |
| D  | 27    | 2828.177<br>1414.431396 [2+] (1)                            | 2811.151                          | 2730.191                         | 2810.167                                                  |
| C  | 28    | 2988.208                                                    | 2971.181                          | 2890.222                         | 2970.197                                                  |
| H  | 29    | 3125.267<br>*1563.34668 [2+] (0)                            | 3108.240                          | 3027.281                         | 3107.256                                                  |
| V  | 30    | 3224.335                                                    | 3207.309<br>1604.505615 [2+] (0)  | 3126.349<br>*1563.34668 [2+] (0) | 3206.325                                                  |
| E  | 31    | 3353.378                                                    | 3336.351                          | 3255.392                         | 3335.367                                                  |
| G  | 32    | 3410.399                                                    | 3393.373                          | 3312.413                         | 3392.389                                                  |
| P  | 33    | 3507.452                                                    | 3490.425                          | 3409.466                         | 3489.441                                                  |
| Q  | 34    | 3635.511                                                    | 3618.484                          | 3537.525<br>1768.699219 [2+] (0) | 3617.500                                                  |
| E  | 35    | 3764.553                                                    | 3747.527                          | 3666.567                         | 3746.543                                                  |

|   |    |   |   |   |   |
|---|----|---|---|---|---|
| R | 36 | - | - | - | - |
|---|----|---|---|---|---|

### C-terminal ions

| AA | C-ion | y                                                       | y*                                | y-98     | yo                                |
|----|-------|---------------------------------------------------------|-----------------------------------|----------|-----------------------------------|
| A  | 36    | -                                                       | -                                 | -        | -                                 |
| C  | 35    | 3867.628                                                | 3850.601                          | 3769.642 | 3849.617                          |
| A  | 34    | 3707.597                                                | 3690.571                          | 3609.611 | 3689.587                          |
| P  | 33    | 3636.560                                                | 3619.533                          | 3538.574 | 3618.549                          |
| P  | 32    | 3539.507                                                | 3522.481                          | 3441.521 | 3521.497                          |
| s  | 31    | 3442.454                                                | 3425.428                          | 3344.469 | 3424.444                          |
| P  | 30    | 3275.456<br>1638.304199 [2+] (0)                        | 3258.430                          | -        | 3257.446                          |
| P  | 29    | 3178.403                                                | 3161.377                          | -        | 3160.393                          |
| S  | 28    | 3081.351                                                | 3064.324                          | -        | 3063.340                          |
| P  | 27    | 2994.319<br>1497.449219 [2+] (1)<br>1498.17334 [2+] (0) | 2977.292                          | -        | 2976.308                          |
| G  | 26    | 2897.266<br>1449.087158 [2+] (0)                        | 2880.239                          | -        | 2879.255                          |
| H  | 25    | 2840.244                                                | 2823.218                          | -        | 2822.234                          |
| G  | 24    | 2703.185<br>1352.094238 [2+] (0)                        | 2686.159                          | -        | 2685.175<br>*1342.804932 [2+] (0) |
| P  | 23    | 2646.164<br>1323.548584 [2+] (1)                        | 2629.137                          | -        | 2628.153                          |
| P  | 22    | 2549.111                                                | 2532.085<br>*1266.396851 [2+] (0) | -        | 2531.101<br>*1266.396851 [2+] (0) |
| D  | 21    | 2452.058                                                | 2435.032                          | -        | 2434.048                          |
| S  | 20    | 2337.031<br>1169.270996 [2+] (4)                        | 2320.005                          | -        | 2319.021                          |
| E  | 19    | 2249.999                                                | 2232.973<br>*1116.796631 [2+] (3) | -        | 2231.989<br>*1116.796631 [2+] (3) |
| S  | 18    | 2120.957<br>1061.062012 [2+] (2)                        | 2103.930                          | -        | 2102.946                          |
| V  | 17    | 2033.925                                                | 2016.898                          | -        | 2015.914                          |
| H  | 16    | 1934.856<br>968.0327759 [2+] (2)                        | 1917.830                          | -        | 1916.846                          |
| S  | 15    | 1797.797                                                | 1780.771                          | -        | 1779.787                          |
| I  | 14    | 1710.765                                                | 1693.739                          | -        | 1692.755                          |
| Y  | 13    | 1597.681<br>799.6922607 [2+] (1)                        | 1580.655                          | -        | 1579.671                          |
| H  | 12    | 1434.618<br>718.3549805 [2+] (0)                        | 1417.591<br>*1417.256348 (0)      | -        | 1416.607<br>1416.521729 (0)       |
| A  | 11    | 1297.559<br>1297.609131 (0)<br>649.8455811 [2+] (0)     | 1280.533                          | -        | 1279.549                          |
| D  | 10    | 1226.522                                                | 1209.495                          | -        | 1208.511                          |
| C  | 9     | 1111.495<br>556.2467651 [2+] (2)                        | 1094.468<br>*1094.369385 (4)      | -        | 1093.484<br>1093.168701 (23)      |
| H  | 8     | 951.464                                                 | 934.438<br>*467.7352295 [2+] (0)  | -        | 933.454<br>*467.7352295 [2+] (0)  |
| V  | 7     | 814.405<br>814.3945923 (0)                              | 797.379                           | -        | 796.395                           |
| E  | 6     | 715.337<br>*715.5177002 (2)                             | 698.310                           | -        | 697.326                           |
| G  | 5     | 586.294                                                 | 569.268                           | -        | 568.284                           |

|   |   |                 |         |   |         |
|---|---|-----------------|---------|---|---------|
| - | - | 586.4112549 (1) | -       | - | -       |
| P | 4 | 529.273         | 512.246 | - | 511.262 |
| Q | 3 | 432.220         | 415.194 | - | 414.210 |
| E | 2 | 304.162         | 287.135 | - | 286.151 |
| R | 1 | 175.119         | 158.092 | - | 157.108 |

### Ion distribution

| Threshold | Ion count | Matches | % matched |
|-----------|-----------|---------|-----------|
| 0         | 170       | 74      | 43        |
| 0.5       | 107       | 49      | 45        |
| 1         | 63        | 29      | 46        |
| 2         | 42        | 19      | 45        |
| 3         | 26        | 11      | 42        |
| 4         | 24        | 9       | 37        |
| 5         | 18        | 6       | 33        |
| 10        | 11        | 4       | 36        |

### Observed ions > 1%

| m/z         | Intensity        | % max | Assignment (delta)     |
|-------------|------------------|-------|------------------------|
| 545.5272217 | 1193.2447509766  | 1.26  |                        |
| 556.2467651 | 2661.5319824219  | 2.82  | y9[2+] (-0.00)         |
| 566.2172241 | 2459.9357910156  | 2.60  | b6-98 (-0.01)          |
| 584.3271484 | 1809.8114013672  | 1.91  |                        |
| 586.4112549 | 1878.4458007813  | 1.99  | y5 (0.11)              |
| 650.6784668 | 1139.0759277344  | 1.20  |                        |
| 715.5177002 | 1925.49609375    | 2.04  | a7o (0.25) : y6 (0.18) |
| 780.3436279 | 2175.9360351563  | 2.30  |                        |
| 799.6922607 | 1170.818359375   | 1.24  | y13[2+] (0.34)         |
| 837.6261597 | 2764.1960449219  | 2.92  |                        |
| 863.0488892 | 1240.1927490234  | 1.31  |                        |
| 885.8071289 | 30716.29296875   | 32.55 |                        |
| 902.4937134 | 4202.1596679688  | 4.45  |                        |
| 903.484375  | 11337.5947265625 | 12.01 |                        |
| 906.3357544 | 4437.177734375   | 4.70  |                        |
| 909.7832642 | 17507.025390625  | 18.55 | b18[2+] (-0.07)        |
| 910.4383545 | 94351.7734375    | 100   | b18[2+] (0.57)         |
| 923.9354858 | 5156.0747070313  | 5.46  |                        |
| 960.6843872 | 2147.9301757813  | 2.27  |                        |
| 961.4415894 | 46910.39453125   | 49.71 | c19[2+] (-0.44)        |
| 962.5379639 | 1699.9114990234  | 1.80  | c9 (0.15)              |
| 963.2283325 | 1804.8911132813  | 1.91  |                        |
| 968.0327759 | 1974.0510253906  | 2.09  | y16[2+] (0.10)         |

|             |                              |       |                                                                   |
|-------------|------------------------------|-------|-------------------------------------------------------------------|
| 968.9866943 | 1648.7102050781 <sub>5</sub> | 1.74  |                                                                   |
| 993.5709229 | 1239.6409912109 <sub>5</sub> | 1.31  | b20o[2+] (-0.33)                                                  |
| 999.3887329 | 6778.51171875 <sub>5</sub>   | 7.18  |                                                                   |
| 1022.79364  | 1020.1750488281 <sub>5</sub> | 1.08  | b21-98[2+] (0.34)                                                 |
| 1054.626587 | 2880.7724609375 <sub>5</sub> | 3.05  | a11* (0.21)                                                       |
| 1061.062012 | 2308.2763671875 <sub>5</sub> | 2.44  | y18[2+] (0.07)                                                    |
| 1062.075806 | 1836.8203125 <sub>5</sub>    | 1.94  | b21o[2+] (-0.36)                                                  |
| 1062.855225 | 1125.7318115234 <sub>5</sub> | 1.19  | b21o[2+] (0.41) : b21*[2+] (-0.07)                                |
| 1086.339478 | 2177.95703125 <sub>5</sub>   | 2.30  |                                                                   |
| 1087.515625 | 4209.771484375 <sub>5</sub>  | 4.46  |                                                                   |
| 1092.319214 | 2786.5053710938 <sub>5</sub> | 2.95  | a22o[2+] (0.36) : a22*[2+] (-0.12)                                |
| 1093.168701 | 21908.361328125 <sub>5</sub> | 23.21 | y9o (-0.31)                                                       |
| 1094.369385 | 4606.2114257813 <sub>5</sub> | 4.88  | y9* (-0.09) : z9 (-0.09)                                          |
| 1116.796631 | 3395.3918457031 <sub>5</sub> | 3.59  | c11 (0.34) : y19o[2+] (0.29) : y19*[2+] (-0.19) : z19[2+] (-0.19) |
| 1119.152222 | 8841.396484375 <sub>5</sub>  | 9.37  |                                                                   |
| 1119.945557 | 14411.041015625 <sub>5</sub> | 15.27 |                                                                   |
| 1143.224609 | 2223.5974121094 <sub>5</sub> | 2.35  |                                                                   |
| 1148.159424 | 5398.962890625 <sub>5</sub>  | 5.72  | a23o[2+] (-0.33)                                                  |
| 1149.062866 | 7710.0122070313 <sub>5</sub> | 8.17  | a23o[2+] (0.56) : a23*[2+] (0.07)                                 |
| 1163.873535 | 1773.6077880859 <sub>5</sub> | 1.87  |                                                                   |
| 1169.270996 | 4013.6889648438 <sub>5</sub> | 4.25  | y20[2+] (0.25)                                                    |
| 1174.878174 | 2628.1606445313 <sub>5</sub> | 2.78  |                                                                   |
| 1175.789917 | 1982.1311035156 <sub>5</sub> | 2.10  |                                                                   |
| 1180.652588 | 19345.45703125 <sub>5</sub>  | 20.50 |                                                                   |
| 1181.585571 | 15012.19140625 <sub>5</sub>  | 15.91 |                                                                   |
| 1204.275635 | 4690.26171875 <sub>5</sub>   | 4.97  | b24-98[2+] (0.23)                                                 |
| 1205.290405 | 2398.0725097656 <sub>5</sub> | 2.54  |                                                                   |
| 1212.640869 | 5507.583984375 <sub>5</sub>  | 5.83  |                                                                   |
| 1213.534912 | 58768.3984375 <sub>5</sub>   | 62.28 |                                                                   |
| 1214.637695 | 5556.5961914063 <sub>5</sub> | 5.88  |                                                                   |
| 1231.060547 | 1970.6368408203 <sub>5</sub> | 2.08  | a24*[2+] (0.54)                                                   |
| 1236.358643 | 2151.4948730469 <sub>5</sub> | 2.28  | b12 (-0.12)                                                       |
| 1237.360229 | 23310.91796875 <sub>5</sub>  | 24.70 |                                                                   |
| 1251.167725 | 991.7432250977 <sub>5</sub>  | 1.05  |                                                                   |
| 1323.548584 | 1214.2867431641 <sub>5</sub> | 1.28  | y23[2+] (-0.03)                                                   |
| 1353.148438 | 1281.25 <sub>5</sub>         | 1.35  |                                                                   |
| 1367.243408 | 1316.9381103516 <sub>5</sub> | 1.39  |                                                                   |
| 1414.431396 | 1077.8884277344 <sub>5</sub> | 1.14  | b27[2+] (-0.16)                                                   |
| 1415.428223 | 1530.1982421875 <sub>5</sub> | 1.62  |                                                                   |
| 1497.449219 | 996.2253417969 <sub>5</sub>  | 1.05  | y27[2+] (-0.21)                                                   |

S601

# ProPhosSI MS/MS report

Mass: 624.819760 Charge: 2+

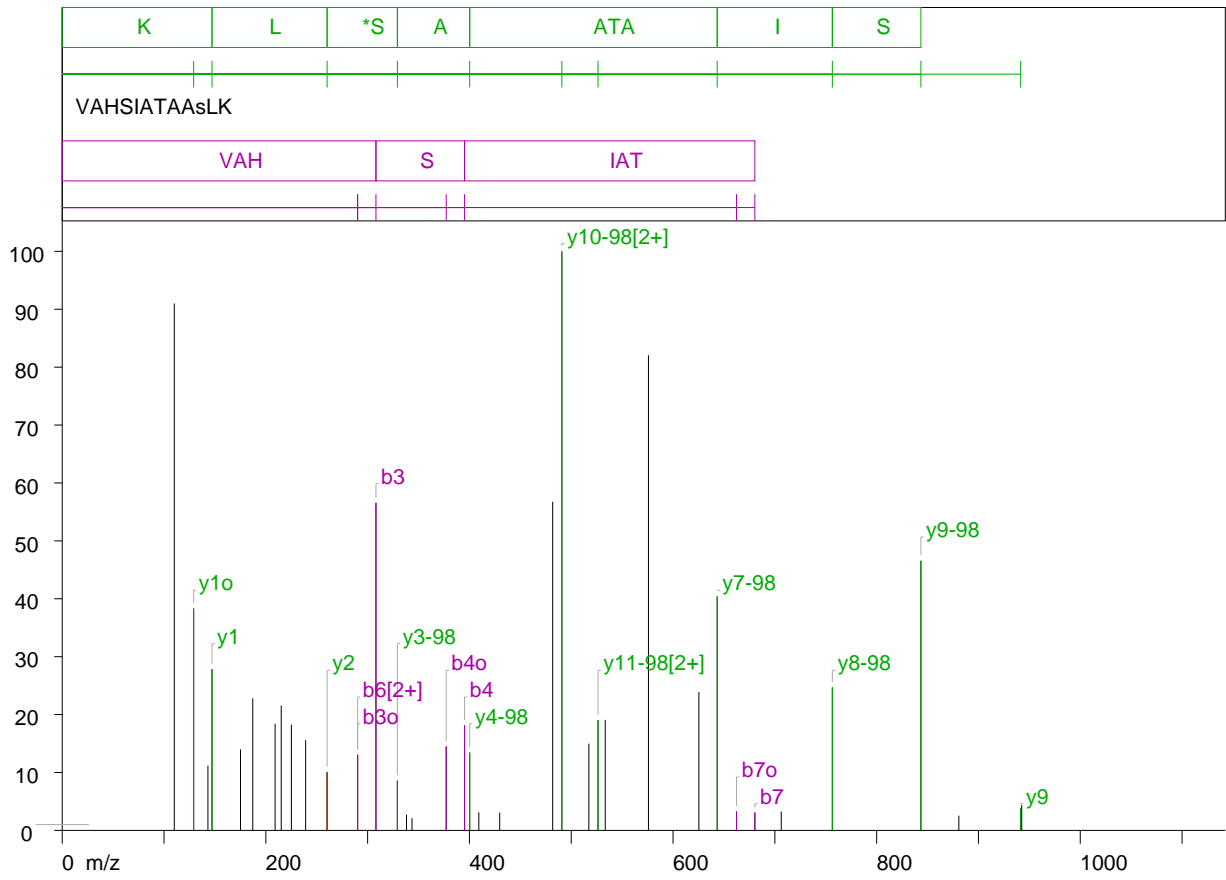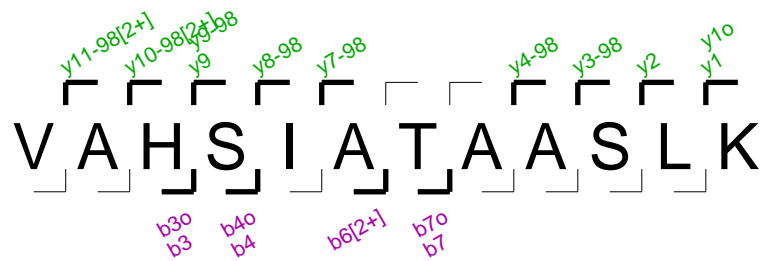



## Cav3.2 Rat

(28) 592 VAHSIATAAsLK 603 1247.627 (-0.0036) Da

|                         |     |
|-------------------------|-----|
| Parent Ion              | m/z |
| No parent ions observed |     |

### Modifications and supporting evidence

| Position | Residue ID | Modification | Evidence    |
|----------|------------|--------------|-------------|
| 10       | (601)      | Phospho (ST) | y2 => y3-98 |

### Spectrum interpretation

| Rule                                   | passed/tests | Description                                                                                                                                                                                                                                                                                                                                                                                                                                                                                                                                                                                                                                                                                                                                            |
|----------------------------------------|--------------|--------------------------------------------------------------------------------------------------------------------------------------------------------------------------------------------------------------------------------------------------------------------------------------------------------------------------------------------------------------------------------------------------------------------------------------------------------------------------------------------------------------------------------------------------------------------------------------------------------------------------------------------------------------------------------------------------------------------------------------------------------|
| Parent ions present                    | 0/1          | Parent ions corresponding to the parent fragment - 1 phosphate ions were not found                                                                                                                                                                                                                                                                                                                                                                                                                                                                                                                                                                                                                                                                     |
| Three -98 Ions present                 | 1/1          | 7 des-phospho fragment ions were found.                                                                                                                                                                                                                                                                                                                                                                                                                                                                                                                                                                                                                                                                                                                |
| Unique -98 transitions present         | 1/1          | transition y2 to y3-98 support unique phosphorylation at position 10<br><br/>                                                                                                                                                                                                                                                                                                                                                                                                                                                                                                                                                                                                                                                                          |
| Four Sequential b or y ions            | 1/1          | Sequence of four y ions found from y1 to y4-98.                                                                                                                                                                                                                                                                                                                                                                                                                                                                                                                                                                                                                                                                                                        |
| Five of six sequential ions present    | 1/1          | Five of Six ions found between y6 and y11<br>Five of Six ions found between y7 and y12                                                                                                                                                                                                                                                                                                                                                                                                                                                                                                                                                                                                                                                                 |
| Proline directed fragmentation pattern | 0/0          |                                                                                                                                                                                                                                                                                                                                                                                                                                                                                                                                                                                                                                                                                                                                                        |
| PhosphoTyrosine transition present     | 0/0          | 0 of 0 phosphotyrosine transitions were found.                                                                                                                                                                                                                                                                                                                                                                                                                                                                                                                                                                                                                                                                                                         |
| Six of top ten ions identified         | 7/6          | ion 1 (mass: 490.7841791: intensity: 56085.75390625) assigned 1 times<br>ion 2 (mass: 110.0717265: intensity: 51038.71484375) assigned 0 times<br>ion 3 (mass: 575.835008: intensity: 46024.7734375) assigned 0 times<br>ion 4 (mass: 481.7737156: intensity: 31834.333984375) assigned 0 times<br>ion 5 (mass: 308.1711228: intensity: 31736.6015625) assigned 1 times<br>ion 6 (mass: 843.4831287: intensity: 26121.78125) assigned 1 times<br>ion 7 (mass: 643.3742417: intensity: 22661.888671875) assigned 1 times<br>ion 8 (mass: 129.1027722: intensity: 21499.732421875) assigned 1 times<br>ion 9 (mass: 147.1137162: intensity: 15616.99609375) assigned 1 times<br>ion 10 (mass: 756.4721571: intensity: 13844.4189453125) assigned 1 times |

### Ion Table

19 ions assigned of 37 ions above threshold (51%).

#### N-terminal ions

| AA | N-ion | b                           | b*      | b-98 | bo                           |
|----|-------|-----------------------------|---------|------|------------------------------|
| V  | 1     | 100.076                     | 83.049  | -    | 82.065                       |
| A  | 2     | 171.113                     | 154.086 | -    | 153.102                      |
| H  | 3     | 308.172<br>308.1711228 (56) | 291.145 | -    | 290.161<br>*290.1600238 (13) |
| S  | 4     | 395.204<br>395.2012701 (18) | 378.177 | -    | 377.193<br>377.1940986 (14)  |
| I  | 5     | 508.288                     | 491.261 | -    | 490.277                      |
| A  | 6     | 579.325                     | 562.298 | -    | 561.314                      |

|   |    |                        |          |          |                            |
|---|----|------------------------|----------|----------|----------------------------|
| - | -  | *290.1600238 [2+] (13) | -        | -        | -                          |
| T | 7  | 680.373<br>680.37 (3)  | 663.346  | -        | 662.362<br>662.3550733 (3) |
| A | 8  | 751.410                | 734.383  | -        | 733.399                    |
| A | 9  | 822.447                | 805.420  | -        | 804.436                    |
| s | 10 | 989.445                | 972.419  | 891.459  | 971.435                    |
| L | 11 | 1102.529               | 1085.503 | 1004.543 | 1084.519                   |
| K | 12 | -                      | -        | -        | -                          |

### C-terminal ions

| AA | C-ion | y                           | y*       | y-98                              | yo                          |
|----|-------|-----------------------------|----------|-----------------------------------|-----------------------------|
| V  | 12    | -                           | -        | -                                 | -                           |
| A  | 11    | 1149.566                    | 1132.540 | 1051.581<br>526.2947009 [2+] (19) | 1131.556                    |
| H  | 10    | 1078.529                    | 1061.503 | 980.543<br>490.7841791 [2+] (100) | 1060.519                    |
| S  | 9     | 941.470<br>941.463748 (3)   | 924.444  | 843.484<br>843.4831287 (46)       | 923.460                     |
| I  | 8     | 854.438                     | 837.412  | 756.452<br>756.4721571 (24)       | 836.428                     |
| A  | 7     | 741.354                     | 724.328  | 643.368<br>643.3742417 (40)       | 723.344                     |
| T  | 6     | 670.317                     | 653.291  | 572.331                           | 652.307                     |
| A  | 5     | 569.269                     | 552.243  | 471.284                           | 551.259                     |
| A  | 4     | 498.232                     | 481.206  | 400.246<br>400.2543806 (13)       | 480.222                     |
| s  | 3     | 427.195                     | 410.169  | 329.209<br>329.2186941 (8)        | 409.185                     |
| L  | 2     | 260.197<br>260.1984511 (10) | 243.170  | -                                 | 242.186                     |
| K  | 1     | 147.113<br>147.1137162 (27) | 130.086  | -                                 | 129.102<br>129.1027722 (38) |

### Ion distribution

| Threshold | Ion count | Matches | % matched |
|-----------|-----------|---------|-----------|
| 0         | 37        | 19      | 51        |
| 0.5       | 37        | 19      | 51        |
| 1         | 37        | 19      | 51        |
| 2         | 37        | 19      | 51        |
| 3         | 34        | 19      | 55        |
| 4         | 28        | 16      | 57        |
| 5         | 27        | 16      | 59        |
| 10        | 26        | 15      | 57        |

### Observed ions > 1%

| m/z         | Intensity        | % max | Assignment (delta) |
|-------------|------------------|-------|--------------------|
| 110.0717265 | 51038.71484375,  | 91.00 |                    |
| 129.1027722 | 21499.732421875, | 38.33 | y1o (-2.27)        |

|             |                   |       |                              |
|-------------|-------------------|-------|------------------------------|
| 143.1181904 | 6267.6850585938,  | 11.17 | a2 (-0.00)                   |
| 147.1137162 | 15616.99609375,   | 27.84 | y1 (0.00)                    |
| 175.1189387 | 7846.4360351563,  | 13.99 | a4o[2+] (0.01) : x1 (0.01)   |
| 187.1441932 | 12792.2021484375, | 22.80 |                              |
| 209.1030746 | 10330.2841796875, | 18.41 |                              |
| 215.1397966 | 12094.00390625,   | 21.56 |                              |
| 225.0977782 | 10242.060546875,  | 18.26 |                              |
| 239.0950025 | 8738.921875,      | 15.58 |                              |
| 260.1984511 | 5656.5092773438,  | 10.08 | y2 (0.00)                    |
| 290.1600238 | 7325.97265625,    | 13.06 | b3o (-0.00) : b6[2+] (-0.00) |
| 308.1711228 | 31736.6015625,    | 56.58 | b3 (-0.00)                   |
| 329.2186941 | 4811.6787109375,  | 8.57  | y3-98 (0.00)                 |
| 338.1852229 | 1526.6304931641,  | 2.72  |                              |
| 343.5815347 | 1190.7426757813,  | 2.12  |                              |
| 377.1940986 | 8131.3642578125,  | 14.49 | b4o (0.00)                   |
| 395.2012701 | 10176.0068359375, | 18.14 | b4 (-0.00)                   |
| 400.2543806 | 7540.76953125,    | 13.44 | y4-98 (0.00)                 |
| 409.2200327 | 1756.0395507813,  | 3.13  |                              |
| 429.7391961 | 1726.3359375,     | 3.07  |                              |
| 481.7737156 | 31834.333984375,  | 56.76 |                              |
| 490.7841791 | 56085.75390625,   | 100   | y10-98[2+] (0.00)            |
| 517.2889014 | 8403.28515625,    | 14.98 |                              |
| 526.2947009 | 10679.2451171875, | 19.04 | y11-98[2+] (0.00)            |
| 533.4082106 | 10702.7275390625, | 19.08 |                              |
| 575.835008  | 46024.7734375,    | 82.06 |                              |
| 625.3557904 | 13409.9736328125, | 23.90 |                              |
| 643.3742417 | 22661.888671875,  | 40.40 | y7-98 (0.00)                 |
| 662.3550733 | 1836.5678710938,  | 3.27  | b7o (-0.00)                  |
| 680.37      | 1732.8216552734,  | 3.08  | b7 (-0.00)                   |
| 706.3032368 | 1831.3403320313,  | 3.26  |                              |
| 756.4721571 | 13844.4189453125, | 24.68 | y8-98 (0.01)                 |
| 843.4831287 | 26121.78125,      | 46.57 | y9-98 (-0.00)                |
| 880.7306716 | 1426.1782226563,  | 2.54  |                              |
| 941.463748  | 2179.0361328125,  | 3.88  | y9 (-0.00)                   |
| 942.4783185 | 2468.0009765625,  | 4.40  |                              |

S647 and

S650 and

S653

(trip)

# ProPhosSI MS/MS report

Mass: 820.6923828125 Charge: 3+

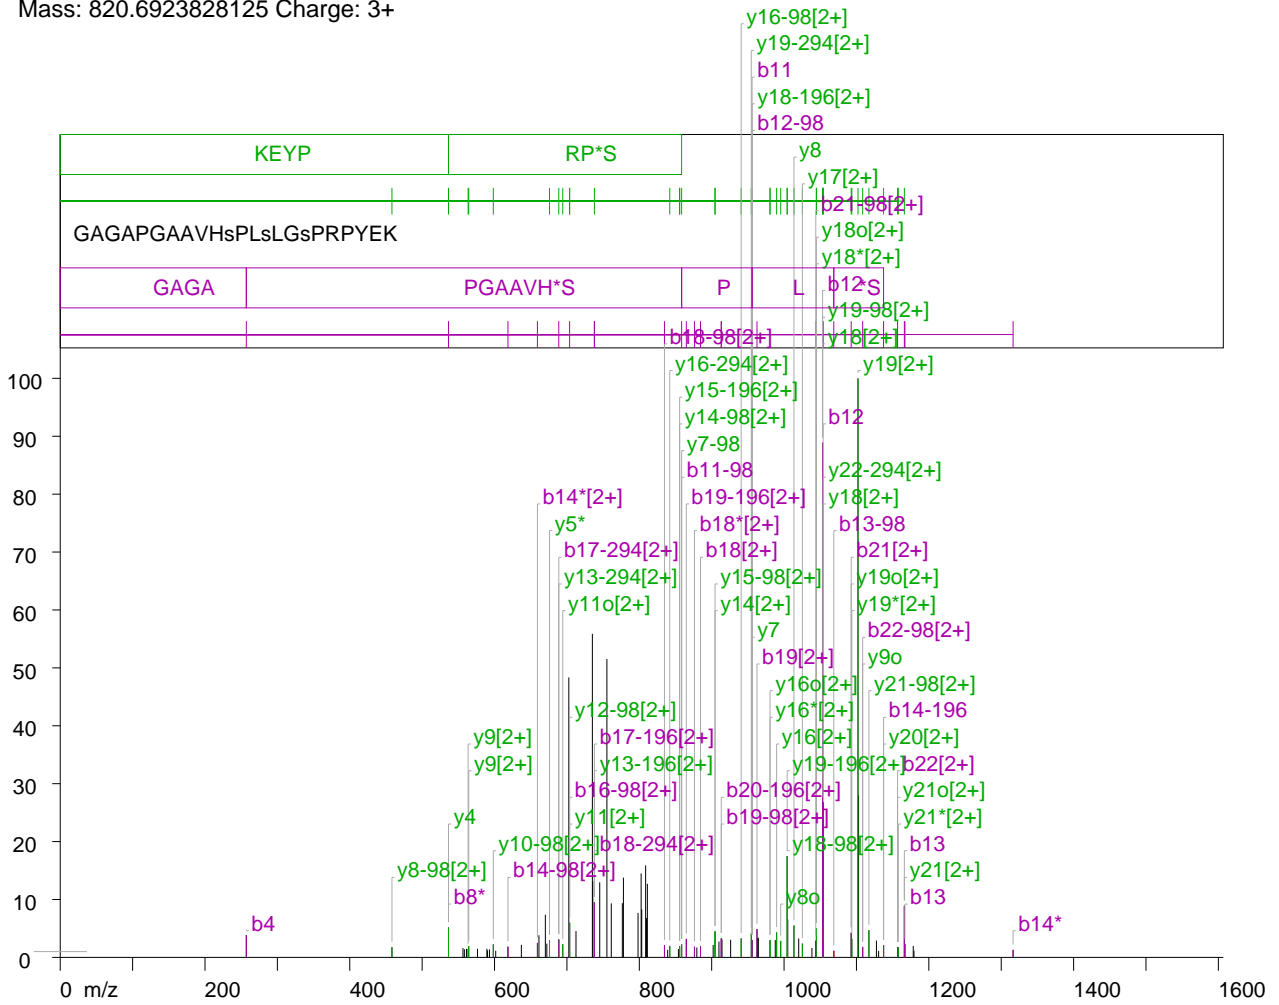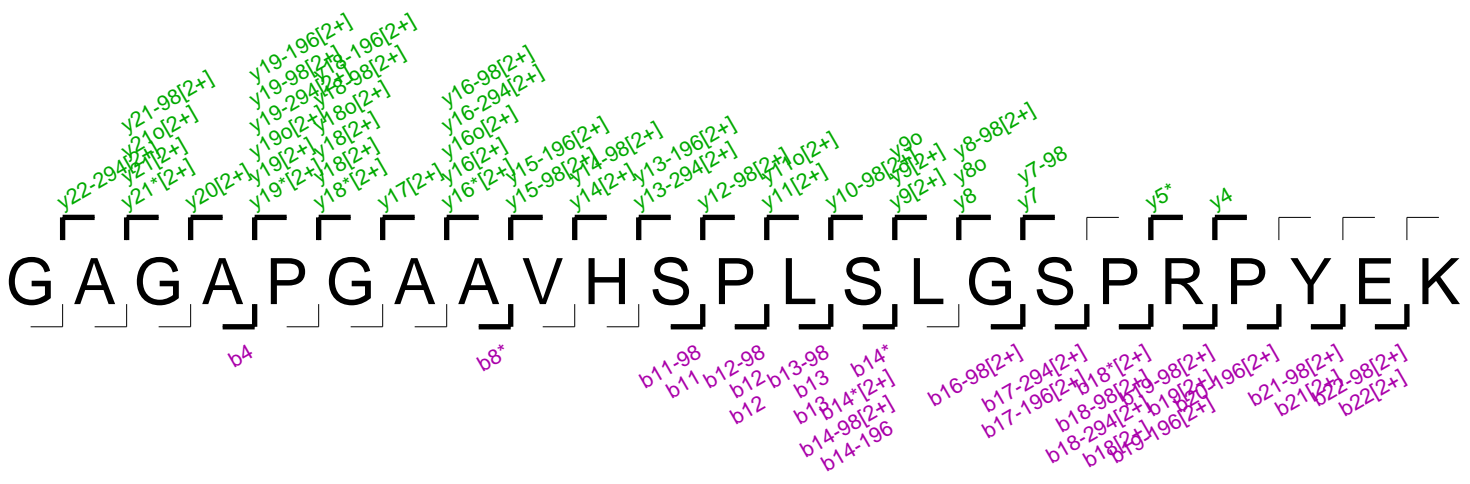

## Cav3.2 Rat

(34) 637 GAGAPGAAVHsPLsLGsPRPYEK 659 2458.048 (1.0051) Da

|                         |     |
|-------------------------|-----|
| Parent Ion              | m/z |
| No parent ions observed |     |

## Modifications and supporting evidence

| Position | Residue ID | Modification | Evidence          |
|----------|------------|--------------|-------------------|
| 11       | (647)      | Phospho (ST) |                   |
| 14       | (650)      | Phospho (ST) | b13-98 => b14-196 |
| 17       | (653)      | Phospho (ST) |                   |

## Spectrum interpretation

| Rule                                   | passed/tests | Description                                                                                                                                                                                                                                                                                                                                                                                                                                                                                                                                                                                                                                                                                                                                                 |
|----------------------------------------|--------------|-------------------------------------------------------------------------------------------------------------------------------------------------------------------------------------------------------------------------------------------------------------------------------------------------------------------------------------------------------------------------------------------------------------------------------------------------------------------------------------------------------------------------------------------------------------------------------------------------------------------------------------------------------------------------------------------------------------------------------------------------------------|
| Parent ions present                    | 0/1          | Parent ions corresponding to the parent fragment - 3 phosphate ions were not found                                                                                                                                                                                                                                                                                                                                                                                                                                                                                                                                                                                                                                                                          |
| Three -98 Ions present                 | 1/1          | 12 des-phospho fragment ions were found.                                                                                                                                                                                                                                                                                                                                                                                                                                                                                                                                                                                                                                                                                                                    |
| Unique -98 transitions present         | 3/3          | transition b4 to b11-98 support unique phosphorylation at position 11<br><br/>transition b13-98 to b14-196 support unique phosphorylation at position 14<br><br/>transition b14-196 to b17-294, transition y4 to y7-98 support unique phosphorylation at position 17<br><br/>                                                                                                                                                                                                                                                                                                                                                                                                                                                                               |
| Four Sequential b or y ions            | 1/1          | Sequence of four b ions found from b11-98 to b14-196.                                                                                                                                                                                                                                                                                                                                                                                                                                                                                                                                                                                                                                                                                                       |
| Five of six sequential ions present    | 0/1          |                                                                                                                                                                                                                                                                                                                                                                                                                                                                                                                                                                                                                                                                                                                                                             |
| Proline directed fragmentation pattern | 3/5          | PASS: y19-294> y18-294<br/><br>PASS: b5< b4<br/><br>NOTE: S-P is a low abundance fragmentation.<br>No proline ions at y12-196<br>FAIL: b12-98> b11-98<br/>NOTE: S-P is a low abundance fragmentation.<br>No proline ions at y6<br>FAIL: b18-294> b17-294<br/>PASS: y4> y3<br/><br>No proline ions at b20-294<br/>                                                                                                                                                                                                                                                                                                                                                                                                                                           |
| PhosphoTyrosine transition present     | 0/0          | 0 of 0 phosphotyrosine transitions were found.                                                                                                                                                                                                                                                                                                                                                                                                                                                                                                                                                                                                                                                                                                              |
| Six of top ten ions identified         | 4/6          | ion 1 (mass: 1102.118042: intensity: 7456.8642578125) assigned 1 times<br>ion 2 (mass: 1053.247559: intensity: 6627.9697265625) assigned 3 times<br>ion 3 (mass: 735.1524658: intensity: 4166.8247070313) assigned 0 times<br>ion 4 (mass: 755.2486572: intensity: 3841.9301757813) assigned 0 times<br>ion 5 (mass: 702.6068115: intensity: 3605.36328125) assigned 0 times<br>ion 6 (mass: 1102.917236: intensity: 2084.8635253906) assigned 0 times<br>ion 7 (mass: 1054.005127: intensity: 1995.7211914063) assigned 3 times<br>ion 8 (mass: 1004.314209: intensity: 1303.9248046875) assigned 2 times<br>ion 9 (mass: 808.7316895: intensity: 1184.779296875) assigned 0 times<br>ion 10 (mass: 802.5161133: intensity: 1080.5546875) assigned 0 times |

## Ion Table

55 ions assigned of 93 ions above threshold (59%).

### N-terminal ions

| AA | N-ion | b                                                  | b*                                                    | b-196                                | b-294                                | b-98                                 | bo       |
|----|-------|----------------------------------------------------|-------------------------------------------------------|--------------------------------------|--------------------------------------|--------------------------------------|----------|
| G  | 1     | 58.029                                             | 41.002                                                | -                                    | -                                    | -                                    | 40.018   |
| A  | 2     | 129.066                                            | 112.039                                               | -                                    | -                                    | -                                    | 111.055  |
| G  | 3     | 186.087                                            | 169.061                                               | -                                    | -                                    | -                                    | 168.077  |
| A  | 4     | 257.125<br>257.096283 (3)                          | 240.098                                               | -                                    | -                                    | -                                    | 239.114  |
| P  | 5     | 354.177                                            | 337.151                                               | -                                    | -                                    | -                                    | 336.167  |
| G  | 6     | 411.199                                            | 394.172                                               | -                                    | -                                    | -                                    | 393.188  |
| A  | 7     | 482.236                                            | 465.209                                               | -                                    | -                                    | -                                    | 464.225  |
| A  | 8     | 553.273                                            | 536.246<br>*536.3874512 (5)                           | -                                    | -                                    | -                                    | 535.262  |
| V  | 9     | 652.341                                            | 635.315                                               | -                                    | -                                    | -                                    | 634.331  |
| H  | 10    | 789.400                                            | 772.374                                               | -                                    | -                                    | -                                    | 771.390  |
| s  | 11    | 956.399<br>*955.859375 (3)                         | 939.372                                               | -                                    | -                                    | 858.413<br>*858.4998779 (2)          | 938.388  |
| P  | 12    | 1053.451<br>*1054.005127 (26)<br>*1053.247559 (88) | 1036.425                                              | -                                    | -                                    | 955.466<br>*955.859375 (3)           | 1035.441 |
| L  | 13    | 1166.535<br>1166.994141 (2)<br>*1166.178589 (8)    | 1149.509                                              | -                                    | -                                    | 1068.550<br>1068.690186 (1)          | 1148.525 |
| s  | 14    | 1333.534                                           | 1316.507<br>1316.391724 (1)<br>659.258606 [2+]<br>(2) | 1137.562<br>*1137.460327 (2)         | -                                    | 1235.548<br>618.5253296 [2+]<br>(1)  | 1315.523 |
| L  | 15    | 1446.618                                           | 1429.591                                              | 1250.646                             | -                                    | 1348.632                             | 1428.607 |
| G  | 16    | 1503.639                                           | 1486.613                                              | 1307.668                             | -                                    | 1405.653<br>*703.715271 [2+]<br>(5)  | 1485.629 |
| s  | 17    | 1670.638                                           | 1653.611                                              | 1474.666<br>*737.9445801 [2+]<br>(9) | 1376.680<br>*688.7616577 [2+]<br>(3) | 1572.652                             | 1652.627 |
| P  | 18    | 1767.690<br>884.5483398 [2+]<br>(1)                | 1750.664<br>876.1865234 [2+]<br>(1)                   | 1571.719                             | 1473.733<br>*737.9445801 [2+]<br>(9) | 1669.705<br>834.7575684 [2+]<br>(2)  | 1749.680 |
| R  | 19    | 1923.792<br>962.5772705 [2+]<br>(4)                | 1906.765                                              | 1727.820<br>864.927124 [2+]<br>(3)   | 1629.834                             | 1825.806<br>*913.2658691 [2+]<br>(3) | 1905.781 |
| P  | 20    | 2020.844                                           | 2003.818                                              | 1824.873<br>*913.2658691 [2+]<br>(3) | 1726.887                             | 1922.858                             | 2002.834 |
| Y  | 21    | 2183.908<br>*1092.739868 [2+]<br>(4)               | 2166.881                                              | 1987.936                             | 1889.950                             | 2085.922<br>1043.813354 [2+]<br>(2)  | 2165.897 |
| E  | 22    | 2312.950<br>*1156.828857 [2+]<br>(1)               | 2295.924                                              | 2116.978                             | 2018.993                             | 2214.964<br>*1108.576416 [2+]<br>(1) | 2294.940 |
| K  | 23    | -                                                  | -                                                     | -                                    | -                                    | -                                    | -        |

### C-terminal ions

| AA | C-ion | y        | y*       | y-196    | y-294                                 | y-98     | yo       |
|----|-------|----------|----------|----------|---------------------------------------|----------|----------|
| G  | 23    | -        | -        | -        | -                                     | -        | -        |
| A  | 22    | 2402.034 | 2385.008 | 2206.063 | 2108.077<br>*1054.005127 [2+]<br>(26) | 2304.048 | 2384.024 |

|   |    |                                                                    |                                      |                                       |                                      |                                       |                                      |
|---|----|--------------------------------------------------------------------|--------------------------------------|---------------------------------------|--------------------------------------|---------------------------------------|--------------------------------------|
| G | 21 | 2330.997<br>*1166.178589<br>[2+] (8)                               | 2313.971<br>*1157.822144<br>[2+] (1) | 2135.025                              | 2037.040                             | 2233.011<br>1117.206787<br>[2+] (4)   | 2312.987<br>*1156.828857<br>[2+] (1) |
| A | 20 | 2273.976<br>*1137.460327<br>[2+] (2)                               | 2256.949                             | 2078.004                              | 1980.018                             | 2175.990                              | 2255.965                             |
| P | 19 | 2202.939<br>1102.118042<br>[2+] (100)                              | 2185.912<br>*1093.608643<br>[2+] (3) | 2006.967<br>*1004.314209<br>[2+] (17) | 1908.981<br>954.699585 [2+]<br>(4)   | 2104.953<br>*1053.247559<br>[2+] (88) | 2184.928<br>*1092.739868<br>[2+] (4) |
| G | 18 | 2105.886<br>*1054.005127<br>[2+] (26)<br>*1053.247559<br>[2+] (88) | 2088.859<br>*1044.662354<br>[2+] (5) | 1909.914<br>*955.859375<br>[2+] (3)   | 1811.928                             | 2007.900<br>*1004.314209<br>[2+] (17) | 2087.875<br>*1044.662354<br>[2+] (5) |
| A | 17 | 2048.864<br>*1025.312988<br>[2+] (2)                               | 2031.838                             | 1852.893                              | 1754.907                             | 1950.878                              | 2030.854                             |
| A | 16 | 1977.827<br>989.6916504<br>[2+] (4)                                | 1960.801<br>*980.5996094<br>[2+] (2) | 1781.855                              | 1683.870<br>842.0861816<br>[2+] (1)  | 1879.841<br>940.7459717<br>[2+] (3)   | 1959.817<br>*980.5996094<br>[2+] (2) |
| V | 15 | 1906.790                                                           | 1889.764                             | 1710.818<br>*855.7409668<br>[2+] (1)  | 1612.832                             | 1808.804<br>*904.6170654<br>[2+] (4)  | 1888.780                             |
| H | 14 | 1807.722<br>*904.6170654<br>[2+] (4)                               | 1790.695                             | 1611.750                              | 1513.764                             | 1709.736<br>*855.7409668<br>[2+] (1)  | 1789.711                             |
| s | 13 | 1670.663                                                           | 1653.636                             | 1474.691<br>*737.9445801<br>[2+] (9)  | 1376.705<br>*688.7616577<br>[2+] (3) | 1572.677                              | 1652.652                             |
| P | 12 | 1503.664                                                           | 1486.638                             | 1307.693                              | -                                    | 1405.679<br>*703.715271<br>[2+] (5)   | 1485.654                             |
| L | 11 | 1406.612<br>*703.715271<br>[2+] (5)                                | 1389.585                             | 1210.640                              | -                                    | 1308.626                              | 1388.601<br>694.253418 [2+]<br>(2)   |
| s | 10 | 1293.528                                                           | 1276.501                             | 1097.556                              | -                                    | 1195.542<br>598.2892456<br>[2+] (2)   | 1275.517                             |
| L | 9  | 1126.529<br>563.5229492<br>[2+] (1)<br>*564.3468628<br>[2+] (1)    | 1109.503                             | -                                     | -                                    | 1028.543                              | 1108.519<br>*1108.576416<br>(1)      |
| G | 8  | 1013.445<br>1013.670654 (5)                                        | 996.419                              | -                                     | -                                    | 915.459<br>458.2911377<br>[2+] (1)    | 995.435<br>995.3485107 (2)           |
| s | 7  | 956.424<br>*955.859375 (3)                                         | 939.397                              | -                                     | -                                    | 858.438<br>*858.4998779<br>(2)        | 938.413                              |
| P | 6  | 789.425                                                            | 772.399                              | -                                     | -                                    | -                                     | 771.415                              |
| R | 5  | 692.373                                                            | 675.346<br>*675.930603 (2)           | -                                     | -                                    | -                                     | 674.362                              |
| P | 4  | 536.272<br>*536.3874512<br>(5)                                     | 519.245                              | -                                     | -                                    | -                                     | 518.261                              |
| Y | 3  | 439.219                                                            | 422.192                              | -                                     | -                                    | -                                     | 421.208                              |
| E | 2  | 276.155                                                            | 259.129                              | -                                     | -                                    | -                                     | 258.145                              |
| K | 1  | 147.113                                                            | 130.086                              | -                                     | -                                    | -                                     | 129.102                              |

## Ion distribution

| Threshold | Ion count | Matches | % matched |
|-----------|-----------|---------|-----------|
| 0         | 161       | 79      | 49        |
| 0.5       | 115       | 65      | 56        |



|    |    |    |    |
|----|----|----|----|
| 1  | 93 | 55 | 59 |
| 2  | 65 | 39 | 60 |
| 3  | 47 | 25 | 53 |
| 4  | 34 | 17 | 50 |
| 5  | 27 | 11 | 40 |
| 10 | 14 | 4  | 28 |

### Observed ions > 1%

| m/z         | Intensity       | % max | Assignment (delta)                                                             |
|-------------|-----------------|-------|--------------------------------------------------------------------------------|
| 257.096283  | 287.7537231445  | 3.85  | b4 (-0.02)                                                                     |
| 458.2911377 | 131.6067657471  | 1.76  | y8-98[2+] (0.05)                                                               |
| 536.3874512 | 386.6726379395  | 5.18  | b8* (0.14) : y4 (0.11)                                                         |
| 556.3580322 | 119.834602356   | 1.60  |                                                                                |
| 558.333374  | 104.1695175171  | 1.39  |                                                                                |
| 561.2437744 | 109.7611846924  | 1.47  | a13o[2+] (0.47) : a13*[2+] (-0.01)                                             |
| 563.5229492 | 106.8663253784  | 1.43  | y9[2+] (-0.24)                                                                 |
| 564.3468628 | 144.5487823486  | 1.93  | y9[2+] (0.57) : x4 (0.07)                                                      |
| 576.4504395 | 110.5234909058  | 1.48  |                                                                                |
| 589.4263306 | 111.0256576538  | 1.48  |                                                                                |
| 590.3377686 | 88.9978713989   | 1.19  |                                                                                |
| 592.9961548 | 103.1854934692  | 1.38  |                                                                                |
| 598.2892456 | 168.2952575684  | 2.25  | y10-98[2+] (0.01)                                                              |
| 601.6085205 | 84.9559783936   | 1.13  |                                                                                |
| 618.5253296 | 139.0649719238  | 1.86  | b14-98[2+] (0.24)                                                              |
| 637.0640869 | 161.523651123   | 2.16  |                                                                                |
| 659.258606  | 186.915435791   | 2.50  | b14*[2+] (0.50)                                                                |
| 661.361084  | 284.676361084   | 3.81  | x10[2+] (0.09)                                                                 |
| 670.197998  | 548.7405395508  | 7.35  |                                                                                |
| 672.277771  | 177.3189697266  | 2.37  |                                                                                |
| 675.930603  | 219.70703125    | 2.94  | z5 (0.58) : y5* (0.58) : c14[2+] (0.14)                                        |
| 688.7616577 | 230.9617004395  | 3.09  | b17-294[2+] (-0.08) : y13-294[2+] (-0.09)                                      |
| 694.253418  | 169.2367706299  | 2.26  | y11o[2+] (-0.55)                                                               |
| 702.6068115 | 3605.36328125   | 48.34 |                                                                                |
| 703.715271  | 445.0864868164  | 5.96  | b16-98[2+] (0.38) : y12-98[2+] (0.37) : y11[2+] (-0.09)                        |
| 712.5438232 | 338.6770019531  | 4.54  |                                                                                |
| 735.1524658 | 4166.8247070313 | 55.87 |                                                                                |
| 735.755249  | 979.4053955078  | 13.13 |                                                                                |
| 737.9445801 | 710.0560913086  | 9.52  | b18-294[2+] (0.57) : b17-196[2+] (0.10) : y13-196[2+] (0.09) : a16[2+] (-0.38) |
| 745.3480225 | 966.9727783203  | 12.96 |                                                                                |
| 755.2486572 | 3841.9301757813 | 51.52 |                                                                                |
| 761.2678223 | 695.8634033203  | 9.33  | c16[2+] (0.43) : a10 (-0.13)                                                   |
| 776.5325928 | 698.3044433594  | 9.36  |                                                                                |

|             |                  |       |                                                               |
|-------------|------------------|-------|---------------------------------------------------------------|
| 778.0611572 | 1027.6905517578, | 13.78 |                                                               |
| 798.2313232 | 573.154296875,   | 7.68  |                                                               |
| 802.5161133 | 1080.5546875,    | 14.49 |                                                               |
| 803.3543701 | 618.7224731445,  | 8.29  |                                                               |
| 808.7316895 | 1184.779296875,  | 15.88 |                                                               |
| 809.9326172 | 507.5465698242,  | 6.80  |                                                               |
| 811.145752  | 947.5770263672,  | 12.70 |                                                               |
| 834.7575684 | 156.7604522705,  | 2.10  | b18-98[2+] (-0.59)                                            |
| 839.2310791 | 97.3733978271,   | 1.30  |                                                               |
| 842.0861816 | 148.7412261963,  | 1.99  | y16-294[2+] (-0.35)                                           |
| 854.0423584 | 107.2260284424,  | 1.43  |                                                               |
| 855.7409668 | 142.6942138672,  | 1.91  | y14-98[2+] (0.36) : y15-196[2+] (-0.17)                       |
| 858.4998779 | 167.3609313965,  | 2.24  | b11-98 (0.08) : y7-98 (0.06)                                  |
| 864.927124  | 238.5420379639,  | 3.19  | b19-196[2+] (0.51)                                            |
| 876.1865234 | 137.3438415527,  | 1.84  | b18*[2+] (0.35)                                               |
| 879.4775391 | 126.4856643677,  | 1.69  |                                                               |
| 884.5483398 | 142.4734649658,  | 1.91  | b18[2+] (0.19)                                                |
| 902.0592041 | 161.0364990234,  | 2.15  |                                                               |
| 904.6170654 | 335.507598877,   | 4.49  | y14[2+] (0.25) : y15-98[2+] (-0.28)                           |
| 910.0257568 | 203.7080383301,  | 2.73  | a11o (-0.36)                                                  |
| 913.2658691 | 245.678604126,   | 3.29  | b20-196[2+] (0.32) : b19-98[2+] (-0.14)                       |
| 914.2368164 | 231.0596923828,  | 3.09  |                                                               |
| 926.1896973 | 227.5413970947,  | 3.05  |                                                               |
| 940.7459717 | 245.0187072754,  | 3.28  | y16-98[2+] (0.32)                                             |
| 954.699585  | 313.887512207,   | 4.20  | y19-294[2+] (-0.29)                                           |
| 955.859375  | 224.2160339355,  | 3.00  | y18-196[2+] (0.39) : b12-98 (0.39) : b11 (-0.53) : y7 (-0.56) |
| 962.5772705 | 364.6381835938,  | 4.88  | b19[2+] (0.17)                                                |
| 963.5245361 | 243.3815307617,  | 3.26  |                                                               |
| 964.4693604 | 253.4126586914,  | 3.39  |                                                               |
| 980.5996094 | 223.5427856445,  | 2.99  | y16o[2+] (0.18) : y16*[2+] (-0.30) : z16[2+] (-0.30)          |
| 987.8280029 | 224.7767028809,  | 3.01  | a20o[2+] (-0.09) : a20*[2+] (-0.58)                           |
| 989.6916504 | 322.6462097168,  | 4.32  | y16[2+] (0.27)                                                |
| 995.3485107 | 212.5473937988,  | 2.85  | y8o (-0.08)                                                   |
| 1004.314209 | 1303.9248046875, | 17.48 | y19-196[2+] (0.32) : y18-98[2+] (-0.13)                       |
| 1005.12085  | 488.9776916504,  | 6.55  |                                                               |
| 1013.670654 | 411.0828552246,  | 5.51  | y8 (0.22)                                                     |
| 1020.233765 | 243.5054626465,  | 3.26  |                                                               |
| 1025.312988 | 178.2073669434,  | 2.38  | y17[2+] (0.37) : a12 (-0.14)                                  |
| 1038.487915 | 121.7625427246,  | 1.63  | x17[2+] (-0.44)                                               |
| 1043.813354 | 215.7219238281,  | 2.89  | b21-98[2+] (0.34)                                             |
| 1044.662354 | 374.3668823242,  | 5.02  | y18o[2+] (0.22) : y18*[2+] (-0.27) : z18[2+] (-0.27)          |
| 1053.247559 | 6627.9697265625, | 88.88 | y19-98[2+] (0.26) : y18[2+] (-0.19) : b12 (-0.20)             |
| 1054.005127 | 1995.7211914063, | 26.76 | y18[2+] (0.55) : b12 (0.55) : y22-294[2+] (-0.53)             |

|             |                              |       |                                    |
|-------------|------------------------------|-------|------------------------------------|
| 1068.690186 | 84.6381607056 <sub>3</sub>   | 1.13  | b13-98 (0.14)                      |
| 1092.739868 | 317.7974243164 <sub>3</sub>  | 4.26  | b21[2+] (0.28) : y19o[2+] (-0.22)  |
| 1093.608643 | 239.3896179199 <sub>3</sub>  | 3.21  | y19*[2+] (0.14) : z19[2+] (0.14)   |
| 1102.118042 | 7456.8642578125 <sub>3</sub> | 100   | y19[2+] (0.14)                     |
| 1102.917236 | 2084.8635253906 <sub>3</sub> | 27.95 |                                    |
| 1108.576416 | 134.908706665 <sub>3</sub>   | 1.80  | b22-98[2+] (0.59) : y9o (0.05)     |
| 1117.206787 | 350.4529724121 <sub>3</sub>  | 4.69  | y21-98[2+] (0.19)                  |
| 1127.605591 | 217.1862640381 <sub>3</sub>  | 2.91  |                                    |
| 1130.627686 | 83.7929916382 <sub>3</sub>   | 1.12  |                                    |
| 1137.460327 | 154.9500732422 <sub>3</sub>  | 2.07  | y20[2+] (-0.03) : b14-196 (-0.10)  |
| 1156.828857 | 130.2043457031 <sub>3</sub>  | 1.74  | b22[2+] (-0.15) : y21o[2+] (-0.16) |
| 1157.822144 | 129.5539550781 <sub>3</sub>  | 1.73  | y21*[2+] (0.33) : z21[2+] (0.33)   |
| 1166.178589 | 665.3137207031 <sub>3</sub>  | 8.92  | y21[2+] (0.17) : b13 (-0.35)       |
| 1166.994141 | 173.7087097168 <sub>3</sub>  | 2.32  | b13 (0.45)                         |
| 1178.430054 | 147.1427459717 <sub>3</sub>  | 1.97  |                                    |
| 1179.447998 | 86.9492950439 <sub>3</sub>   | 1.16  | x21[2+] (-0.55)                    |
| 1316.391724 | 96.6935195923 <sub>3</sub>   | 1.29  | b14* (-0.11)                       |

S687

# ProPhosSI MS/MS report

Mass: 963.134094238281 Charge: 3+

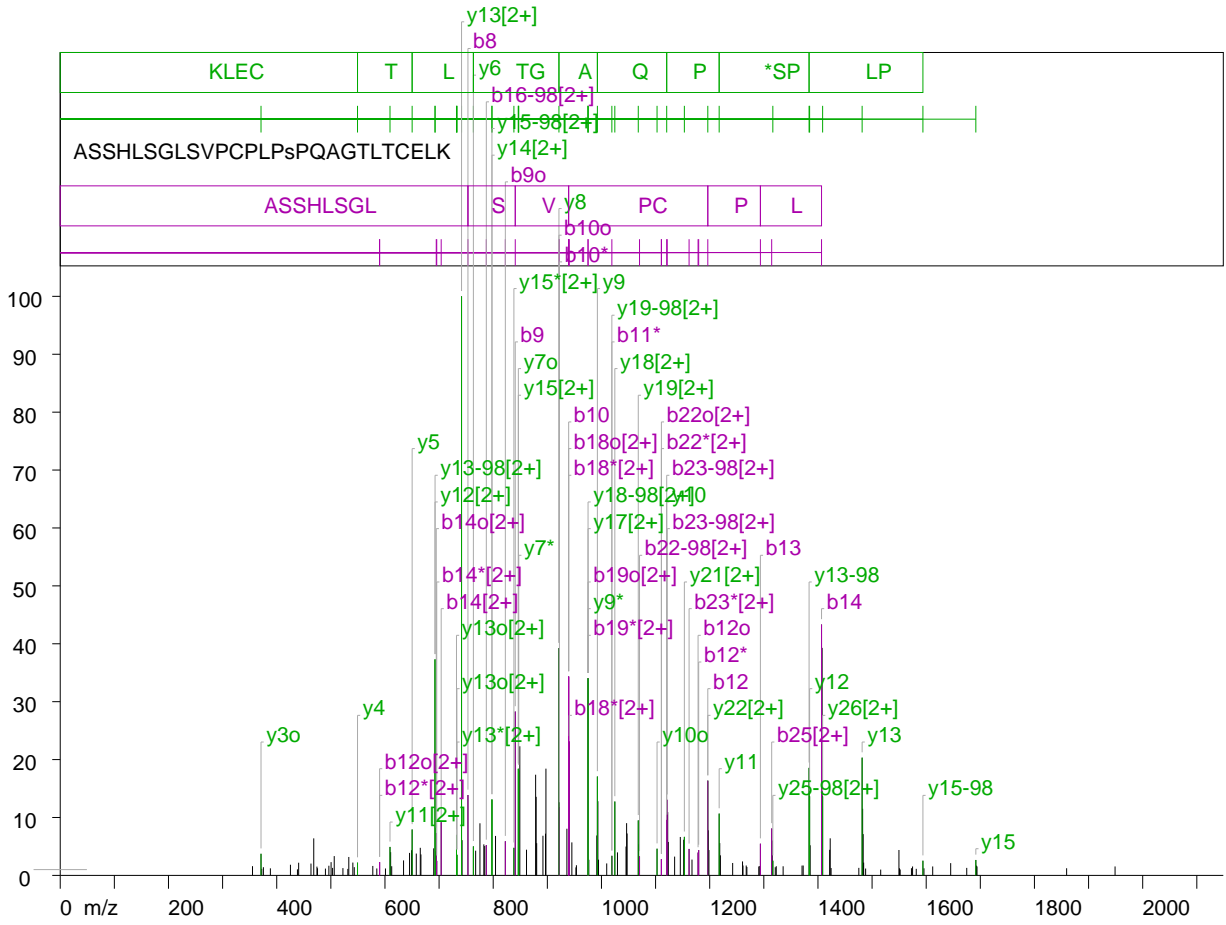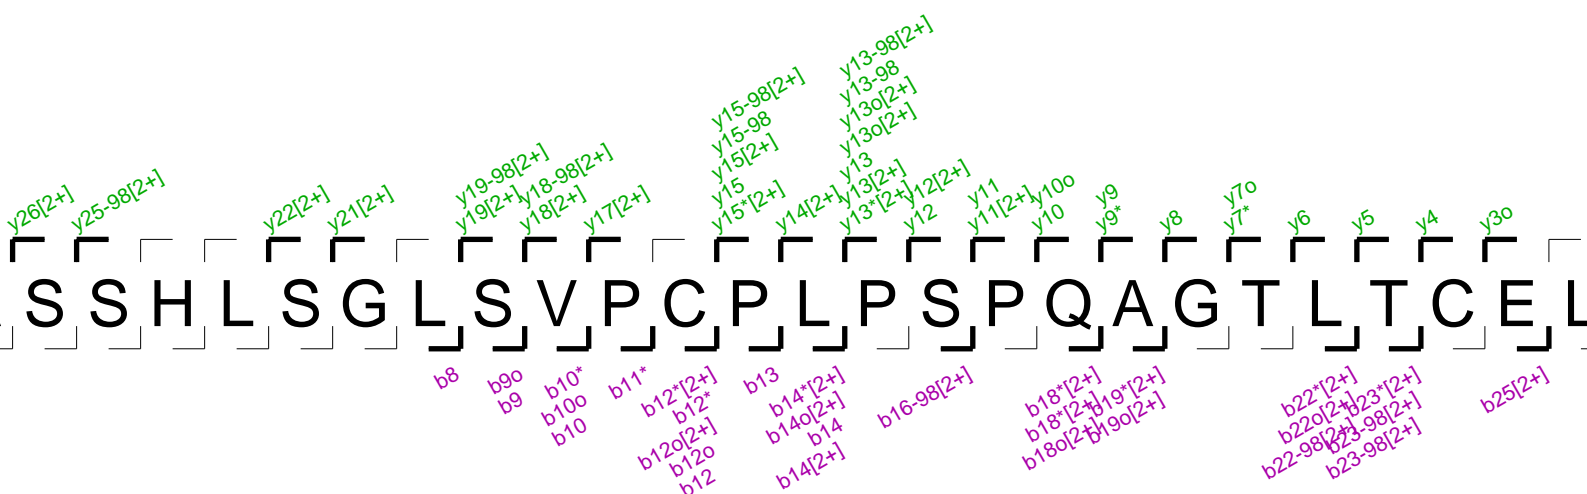

## Cav3.2 Rat

(57) 672 ASSHLSGLSVPCLPsPQAGTLTCELK 698 2886.365 (0.0130) Da

|                         |     |
|-------------------------|-----|
| Parent Ion              | m/z |
| No parent ions observed |     |

## Modifications and supporting evidence

| Position | Residue ID | Modification | Evidence      |
|----------|------------|--------------|---------------|
| 16       | (687)      | Phospho (ST) | y11 => y13-98 |

## Spectrum interpretation

| Rule                                   | passed/tests | Description                                                                                                                                                                                                                                                                                                                                                                                                                                                                                                                                                                                                                                                                                                                                       |
|----------------------------------------|--------------|---------------------------------------------------------------------------------------------------------------------------------------------------------------------------------------------------------------------------------------------------------------------------------------------------------------------------------------------------------------------------------------------------------------------------------------------------------------------------------------------------------------------------------------------------------------------------------------------------------------------------------------------------------------------------------------------------------------------------------------------------|
| Parent ions present                    | 0/1          | Parent ions corresponding to the parent fragment - 1 phosphate ions were not found                                                                                                                                                                                                                                                                                                                                                                                                                                                                                                                                                                                                                                                                |
| Three -98 Ions present                 | 1/1          | 8 des-phospho fragment ions were found.                                                                                                                                                                                                                                                                                                                                                                                                                                                                                                                                                                                                                                                                                                           |
| Unique -98 transitions present         | 1/1          | transition b14 to b16-98, transition y11 to y13-98 support unique phosphorylation at position 16<br><br/>                                                                                                                                                                                                                                                                                                                                                                                                                                                                                                                                                                                                                                         |
| Four Sequential b or y ions            | 1/1          | Sequence of four y ions found from y8 to y11.                                                                                                                                                                                                                                                                                                                                                                                                                                                                                                                                                                                                                                                                                                     |
| Five of six sequential ions present    | 1/1          | Five of Six ions found between b8 and b13<br>Five of Six ions found between b9 and b14<br>Five of Six ions found between y4 and y9<br>Five of Six ions found between y5 and y10<br>Five of Six ions found between y6 and y11<br>Five of Six ions found between y8 and y13                                                                                                                                                                                                                                                                                                                                                                                                                                                                         |
| Proline directed fragmentation pattern | 7/7          | No proline ions at y17-98<br>PASS: b11< b10<br/><br>PASS: y15-98> y14-98<br/><br>PASS: b13< b12 with ratio 2.99<br/><br>PASS: y13-98> y12-98<br/><br>PASS: b15< b14<br/><br>NOTE: S-P is a low abundance fragmentation.<br>PASS: y11> y10 with ratio 1.11<br/><br>PASS: b17-98< b16-98<br/>                                                                                                                                                                                                                                                                                                                                                                                                                                                       |
| PhosphoTyrosine transition present     | 0/0          | 0 of 0 phosphotyrosine transitions were found.                                                                                                                                                                                                                                                                                                                                                                                                                                                                                                                                                                                                                                                                                                    |
| Six of top ten ions identified         | 8/6          | ion 1 (mass: 741.5036621: intensity: 25089.677734375) assigned 1 times<br>ion 2 (mass: 1406.601563: intensity: 10870.2734375) assigned 1 times<br>ion 3 (mass: 1407.643677: intensity: 9857.33984375) assigned 0 times<br>ion 4 (mass: 921.4284668: intensity: 9848.5908203125) assigned 2 times<br>ion 5 (mass: 692.5415039: intensity: 9357.9677734375) assigned 2 times<br>ion 6 (mass: 939.4015503: intensity: 8616.736328125) assigned 3 times<br>ion 7 (mass: 975.2177734: intensity: 8539.875) assigned 6 times<br>ion 8 (mass: 840.7432861: intensity: 7099.9750976563) assigned 1 times<br>ion 9 (mass: 940.4034424: intensity: 5802.3076171875) assigned 2 times<br>ion 10 (mass: 849.1466675: intensity: 5595.328125) assigned 0 times |

## Ion Table

60 ions assigned of 115 ions above threshold (52%).

## N-terminal ions

| AA | N-ion | b                                                    | b*                                                           | b-98                                                       | bo                                                    |
|----|-------|------------------------------------------------------|--------------------------------------------------------------|------------------------------------------------------------|-------------------------------------------------------|
| A  | 1     | 72.044                                               | 55.018                                                       | -                                                          | 54.034                                                |
| S  | 2     | 159.076                                              | 142.050                                                      | -                                                          | 141.066                                               |
| S  | 3     | 246.109                                              | 229.082                                                      | -                                                          | 228.098                                               |
| H  | 4     | 383.167                                              | 366.141                                                      | -                                                          | 365.157                                               |
| L  | 5     | 496.251                                              | 479.225                                                      | -                                                          | 478.241                                               |
| S  | 6     | 583.284                                              | 566.257                                                      | -                                                          | 565.273                                               |
| G  | 7     | 640.305                                              | 623.278                                                      | -                                                          | 622.294                                               |
| L  | 8     | 753.389<br>753.328064 (13)                           | 736.363                                                      | -                                                          | 735.378                                               |
| S  | 9     | 840.421<br>840.7432861 (28)                          | 823.395                                                      | -                                                          | 822.411<br>*822.4033813 (5)                           |
| V  | 10    | 939.490<br>*939.4015503 (34)                         | 922.463<br>922.348877 (11)                                   | -                                                          | 921.479<br>*921.4284668 (39)                          |
| P  | 11    | 1036.542                                             | 1019.516<br>*1019.215759 (3)                                 | -                                                          | 1018.532                                              |
| C  | 12    | 1196.573<br>*1196.509644 (16)                        | 1179.546<br>*590.0717773 [2+] (2)<br>1179.635254 (4)         | -                                                          | 1178.562<br>*590.0717773 [2+] (2)<br>*1178.488525 (3) |
| P  | 13    | 1293.626<br>1293.669067 (5)                          | 1276.599                                                     | -                                                          | 1275.615                                              |
| L  | 14    | 1406.710<br>1406.601563 (43)<br>703.8800659 [2+] (9) | 1389.683<br>695.6395874 [2+] (2)                             | -                                                          | 1388.699<br>694.7428589 [2+] (7)                      |
| P  | 15    | 1503.763                                             | 1486.736                                                     | -                                                          | 1485.752                                              |
| s  | 16    | 1670.761                                             | 1653.734                                                     | 1572.775<br>787.2630005 [2+] (5)                           | 1652.750                                              |
| P  | 17    | 1767.814                                             | 1750.787                                                     | 1669.828                                                   | 1749.803                                              |
| Q  | 18    | 1895.872                                             | 1878.846<br>*939.4015503 [2+] (34)<br>*940.4034424 [2+] (23) | 1797.886                                                   | 1877.862<br>*939.4015503 [2+] (34)                    |
| A  | 19    | 1966.909                                             | 1949.883<br>*975.2177734 [2+] (34)                           | 1868.923                                                   | 1948.899<br>*975.2177734 [2+] (34)                    |
| G  | 20    | 2023.931                                             | 2006.904                                                     | 1925.945                                                   | 2005.920                                              |
| T  | 21    | 2124.978                                             | 2107.952                                                     | 2026.993                                                   | 2106.968                                              |
| L  | 22    | 2238.063                                             | 2221.036<br>*1110.759888 [2+] (2)                            | 2140.077<br>1070.31189 [2+] (3)                            | 2220.052<br>*1110.759888 [2+] (2)                     |
| T  | 23    | 2339.110                                             | 2322.084<br>1161.871582 [2+] (4)                             | 2241.124<br>1121.438477 [2+] (13)<br>*1120.538696 [2+] (9) | 2321.100                                              |
| C  | 24    | 2499.141                                             | 2482.114                                                     | 2401.155                                                   | 2481.130                                              |
| E  | 25    | 2628.183<br>1314.541016 [2+] (8)                     | 2611.157                                                     | 2530.198                                                   | 2610.173                                              |
| L  | 26    | 2741.268                                             | 2724.241                                                     | 2643.282                                                   | 2723.257                                              |
| K  | 27    | -                                                    | -                                                            | -                                                          | -                                                     |

## C-terminal ions

| AA | C-ion | y                                 | y*       | y-98                             | yo       |
|----|-------|-----------------------------------|----------|----------------------------------|----------|
| A  | 27    | -                                 | -        | -                                | -        |
| S  | 26    | 2816.336<br>1408.624268 [2+] (13) | 2799.309 | 2718.350                         | 2798.325 |
| S  | 25    | 2729.304                          | 2712.277 | 2631.318<br>1316.619995 [2+] (2) | 2711.293 |
| H  | 24    | 2642.272                          | 2625.245 | 2544.286                         | 2624.261 |

|   |    |                                                        |                                   |                                                        |                                                           |
|---|----|--------------------------------------------------------|-----------------------------------|--------------------------------------------------------|-----------------------------------------------------------|
| L | 23 | 2505.213                                               | 2488.186                          | 2407.227                                               | 2487.202                                                  |
| S | 22 | 2392.129<br>*1196.509644 [2+] (16)                     | 2375.102                          | 2294.143                                               | 2374.118                                                  |
| G | 21 | 2305.097<br>1153.188965 [2+] (6)                       | 2288.070                          | 2207.111                                               | 2287.086                                                  |
| L | 20 | 2248.075                                               | 2231.049                          | 2150.090                                               | 2230.065                                                  |
| S | 19 | 2134.991<br>1067.996948 [2+] (9)                       | 2117.965                          | 2037.005<br>*1019.215759 [2+] (3)                      | 2116.981                                                  |
| V | 18 | 2047.959<br>1024.681396 [2+] (12)                      | 2030.933                          | 1949.973<br>*975.2177734 [2+] (34)                     | 2029.949                                                  |
| P | 17 | 1948.891<br>*975.2177734 [2+] (34)                     | 1931.864                          | 1850.905                                               | 1930.880                                                  |
| C | 16 | 1851.838                                               | 1834.812                          | 1753.852                                               | 1833.828                                                  |
| P | 15 | 1691.807<br>1691.734253 (2)<br>*846.4263306 [2+] (18)  | 1674.781<br>*838.201416 [2+] (4)  | 1593.822<br>1593.958252 (2)<br>*797.6380615 [2+] (13)  | 1673.797                                                  |
| L | 14 | 1594.755<br>*797.6380615 [2+] (13)                     | 1577.728                          | 1496.769                                               | 1576.744                                                  |
| P | 13 | 1481.671<br>741.5036621 [2+] (100)<br>1481.619263 (20) | 1464.644<br>*732.8942261 [2+] (3) | 1383.685<br>1383.584351 (18)<br>*692.5415039 [2+] (37) | 1463.660<br>*732.8942261 [2+] (3)<br>732.1749878 [2+] (6) |
| s | 12 | 1384.618<br>1384.587402 (13)<br>*692.5415039 [2+] (37) | 1367.591                          | 1286.632                                               | 1366.607                                                  |
| P | 11 | 1217.620<br>609.2869263 [2+] (4)<br>1217.496582 (10)   | 1200.593                          | -                                                      | 1199.609                                                  |
| Q | 10 | 1120.567<br>*1120.538696 (9)                           | 1103.540                          | -                                                      | 1102.556<br>1102.714844 (4)                               |
| A | 9  | 992.508<br>*992.4747314 (17)                           | 975.482<br>*975.2177734 (34)      | -                                                      | 974.498                                                   |
| G | 8  | 921.471<br>*921.4284668 (39)                           | 904.445                           | -                                                      | 903.461                                                   |
| T | 7  | 864.450                                                | 847.423<br>*847.1710205 (18)      | -                                                      | 846.439<br>*846.4263306 (18)                              |
| L | 6  | 763.402<br>763.3447266 (5)                             | 746.375                           | -                                                      | 745.391                                                   |
| T | 5  | 650.318<br>650.2250366 (7)                             | 633.291                           | -                                                      | 632.307                                                   |
| C | 4  | 549.270<br>549.2905273 (2)                             | 532.244                           | -                                                      | 531.260                                                   |
| E | 3  | 389.240                                                | 372.213                           | -                                                      | 371.229<br>371.0009766 (3)                                |
| L | 2  | 260.197                                                | 243.170                           | -                                                      | 242.186                                                   |
| K | 1  | 147.113                                                | 130.086                           | -                                                      | 129.102                                                   |

## Ion distribution

| Threshold | Ion count | Matches | % matched |
|-----------|-----------|---------|-----------|
| 0         | 200       | 87      | 43        |
| 0.5       | 182       | 83      | 45        |
| 1         | 160       | 80      | 50        |
| 2         | 115       | 60      | 52        |
| 3         | 95        | 52      | 54        |
| 4         | 82        | 46      | 56        |
| 5         | 66        | 39      | 59        |



|    |    |    |    |
|----|----|----|----|
| 10 | 30 | 22 | 73 |
|----|----|----|----|

### Observed ions > 1%

| m/z         | Intensity       | % max | Assignment (delta)                                                                                |
|-------------|-----------------|-------|---------------------------------------------------------------------------------------------------|
| 355.2861633 | 399.8542175293  | 1.59  | a8 <sup>[2+]</sup> (0.59) : a4 (0.11)                                                             |
| 371.0009766 | 936.7691040039  | 3.73  | y3o (-0.22)                                                                                       |
| 372.3619385 | 286.1769714355  | 1.14  | y3* (0.14) : z3 (0.14)                                                                            |
| 375.3937988 | 354.8129882813  | 1.41  |                                                                                                   |
| 388.2700195 | 306.0249938965  | 1.21  |                                                                                                   |
| 425.3571167 | 461.7273864746  | 1.84  |                                                                                                   |
| 438.3222046 | 262.5915527344  | 1.04  |                                                                                                   |
| 440.4999084 | 549.0764160156  | 2.18  |                                                                                                   |
| 463.2833252 | 512.7630615234  | 2.04  |                                                                                                   |
| 468.3936157 | 1604.7144775391 | 6.39  | a5 (0.13)                                                                                         |
| 474.3514709 | 380.6453857422  | 1.51  |                                                                                                   |
| 475.339386  | 309.3194580078  | 1.23  | x8 <sup>[2+]</sup> (0.10)                                                                         |
| 490.0163574 | 294.939239502   | 1.17  |                                                                                                   |
| 496.3545532 | 419.3851928711  | 1.67  | a11o <sup>[2+]</sup> (0.58) : b5 (0.10) : a11 <sup>[2+]</sup> (0.08) : y9 <sup>[2+]</sup> (-0.40) |
| 500.4397583 | 574.8174438477  | 2.29  |                                                                                                   |
| 503.2239685 | 325.4585571289  | 1.29  |                                                                                                   |
| 506.2834473 | 836.3876953125  | 3.33  |                                                                                                   |
| 522.3394775 | 316.1452026367  | 1.26  |                                                                                                   |
| 531.4091187 | 281.6301269531  | 1.12  | y4o (0.14)                                                                                        |
| 533.190918  | 798.5045166016  | 3.18  |                                                                                                   |
| 540.6393433 | 556.3157958984  | 2.21  |                                                                                                   |
| 543.2839355 | 356.690246582   | 1.42  |                                                                                                   |
| 549.2905273 | 551.766418457   | 2.19  | y4 (0.01)                                                                                         |
| 577.5448608 | 409.6776733398  | 1.63  | x4 (0.27)                                                                                         |
| 584.9105835 | 300.47265625    | 1.19  | a12 <sup>[2+]</sup> (0.11)                                                                        |
| 590.0717773 | 574.160949707   | 2.28  | b12o <sup>[2+]</sup> (0.28) : b12 <sup>[2+]</sup> (-0.20)                                         |
| 600.9474487 | 299.879699707   | 1.19  | y11 <sup>[2+]</sup> (0.14) : z11 <sup>[2+]</sup> (0.14)                                           |
| 609.2869263 | 1233.689453125  | 4.91  | y11 <sup>[2+]</sup> (-0.02)                                                                       |
| 610.4962769 | 1006.4254150391 | 4.01  |                                                                                                   |
| 612.477478  | 397.3999328613  | 1.58  | a7 (0.16)                                                                                         |
| 634.3221436 | 650.0542602539  | 2.59  |                                                                                                   |
| 645.4384155 | 974.1251220703  | 3.88  |                                                                                                   |
| 649.1875    | 1092.3911132813 | 4.35  |                                                                                                   |
| 650.2250366 | 1989.6561279297 | 7.93  | y5 (-0.09)                                                                                        |
| 657.8629761 | 945.9658813477  | 3.77  | c7 (0.53)                                                                                         |
| 665.2539673 | 1195.7806396484 | 4.76  |                                                                                                   |
| 666.4276123 | 908.8149414063  | 3.62  |                                                                                                   |
| 690.0670166 | 1172.3785400391 | 4.67  | a14 <sup>[2+]</sup> (0.20)                                                                        |

|             |                              |       |                                                                                                     |
|-------------|------------------------------|-------|-----------------------------------------------------------------------------------------------------|
| 692.5415039 | 9357.9677734375 <sub>3</sub> | 37.29 | y13-98[2+] (0.19) : y12[2+] (-0.27)                                                                 |
| 693.461731  | 1046.021484375 <sub>3</sub>  | 4.16  |                                                                                                     |
| 694.7428589 | 1834.162109375 <sub>3</sub>  | 7.31  | b14o[2+] (-0.11)                                                                                    |
| 695.6395874 | 628.8420410156 <sub>3</sub>  | 2.50  | b14*[2+] (0.29)                                                                                     |
| 703.8800659 | 2304.796875 <sub>3</sub>     | 9.18  | b14[2+] (0.02)                                                                                      |
| 732.1749878 | 1754.8182373047 <sub>3</sub> | 6.99  | y13o[2+] (-0.15)                                                                                    |
| 732.8942261 | 891.7216186523 <sub>3</sub>  | 3.55  | y13o[2+] (0.56) : y13*[2+] (0.06) : z13[2+] (0.06)                                                  |
| 741.5036621 | 25089.677734375 <sub>3</sub> | 100   | y13[2+] (0.16)                                                                                      |
| 742.4390869 | 1527.177734375 <sub>3</sub>  | 6.08  |                                                                                                     |
| 753.328064  | 3483.587890625 <sub>3</sub>  | 13.88 | b8 (-0.06)                                                                                          |
| 763.3447266 | 1257.1889648438 <sub>3</sub> | 5.01  | y6 (-0.05)                                                                                          |
| 767.5731812 | 1071.4608154297 <sub>3</sub> | 4.27  |                                                                                                     |
| 775.5047607 | 2258.09765625 <sub>3</sub>   | 9.00  |                                                                                                     |
| 782.6583252 | 1344.7291259766 <sub>3</sub> | 5.35  |                                                                                                     |
| 784.284729  | 1272.3876953125 <sub>3</sub> | 5.07  |                                                                                                     |
| 787.2630005 | 1316.7901611328 <sub>3</sub> | 5.24  | b16-98[2+] (0.37)                                                                                   |
| 797.6380615 | 3288.3610839844 <sub>3</sub> | 13.10 | y15-98[2+] (0.22) : y14[2+] (-0.24)                                                                 |
| 804.2877197 | 1710.3864746094 <sub>3</sub> | 6.81  |                                                                                                     |
| 822.4033813 | 1479.87109375 <sub>3</sub>   | 5.89  | a16[2+] (0.51) : b9o (-0.00)                                                                        |
| 838.201416  | 1194.6385498047 <sub>3</sub> | 4.76  | y15*[2+] (0.30) : z15[2+] (0.30)                                                                    |
| 840.7432861 | 7099.9750976563 <sub>3</sub> | 28.29 | b9 (0.32)                                                                                           |
| 846.4263306 | 4619.2368164063 <sub>3</sub> | 18.41 | y15[2+] (0.01) : y7o (-0.01)                                                                        |
| 847.1710205 | 4551.908203125 <sub>3</sub>  | 18.14 | z7 (-0.25) : y7* (-0.25)                                                                            |
| 849.1466675 | 5595.328125 <sub>3</sub>     | 22.30 |                                                                                                     |
| 861.5380859 | 1113.4254150391 <sub>3</sub> | 4.43  | a17o[2+] (0.12) : a17*[2+] (-0.36)                                                                  |
| 878.357605  | 4362.6611328125 <sub>3</sub> | 17.38 |                                                                                                     |
| 879.2957764 | 3404.7160644531 <sub>3</sub> | 13.57 |                                                                                                     |
| 880.3049316 | 1396.2163085938 <sub>3</sub> | 5.56  |                                                                                                     |
| 891.9003296 | 1718.1280517578 <sub>3</sub> | 6.84  | x7 (-0.54)                                                                                          |
| 896.642334  | 1807.5494384766 <sub>3</sub> | 7.20  |                                                                                                     |
| 897.4100342 | 4625.1884765625 <sub>3</sub> | 18.43 |                                                                                                     |
| 921.4284668 | 9848.5908203125 <sub>3</sub> | 39.25 | y8 (-0.04) : b10o (-0.05)                                                                           |
| 922.348877  | 2936.4582519531 <sub>3</sub> | 11.70 | b10* (-0.11)                                                                                        |
| 936.1256104 | 2021.8818359375 <sub>3</sub> | 8.05  |                                                                                                     |
| 939.4015503 | 8616.736328125 <sub>3</sub>  | 34.34 | b18o[2+] (-0.03) : b10 (-0.08) : b18*[2+] (-0.52)                                                   |
| 940.4034424 | 5802.3076171875 <sub>3</sub> | 23.12 | b18*[2+] (0.47) : x16[2+] (-0.01)                                                                   |
| 945.3265381 | 1430.4227294922 <sub>3</sub> | 5.70  |                                                                                                     |
| 952.8249512 | 346.9094543457 <sub>3</sub>  | 1.38  |                                                                                                     |
| 953.7516479 | 439.8362121582 <sub>3</sub>  | 1.75  |                                                                                                     |
| 975.2177734 | 8539.875 <sub>3</sub>        | 34.03 | y17[2+] (0.26) : b19o[2+] (0.26) : b19*[2+] (-0.22) : y9* (-0.26) : z9 (-0.26) : y18-98[2+] (-0.27) |
| 976.6245117 | 677.0791625977 <sub>3</sub>  | 2.69  |                                                                                                     |
| 991.3877563 | 1730.0743408203 <sub>3</sub> | 6.89  | a11* (-0.13)                                                                                        |

|             |                 |       |                                    |
|-------------|-----------------|-------|------------------------------------|
| 992.4747314 | 4284.4765625    | 17.07 | c19[2+] (0.00) : y9 (-0.03)        |
| 993.3944702 | 3214.6674804688 | 12.81 |                                    |
| 994.5930786 | 681.4884033203  | 2.71  |                                    |
| 1009.701233 | 518.9915161133  | 2.06  |                                    |
| 1019.215759 | 847.6633911133  | 3.37  | y19-98[2+] (0.20) : b11* (-0.30)   |
| 1024.681396 | 3200.5183105469 | 12.75 | y18[2+] (0.19)                     |
| 1029.596191 | 996.9678955078  | 3.97  |                                    |
| 1045.394409 | 1250.4298095703 | 4.98  |                                    |
| 1046.462036 | 2263.5163574219 | 9.02  |                                    |
| 1047.355225 | 1816.556640625  | 7.24  |                                    |
| 1067.996948 | 2383.8962402344 | 9.50  | y19[2+] (-0.00)                    |
| 1068.790283 | 1348.3713378906 | 5.37  |                                    |
| 1070.31189  | 819.8553466797  | 3.26  | b22-98[2+] (-0.23)                 |
| 1102.714844 | 1156.2346191406 | 4.60  | y10o (0.15)                        |
| 1110.759888 | 701.0042114258  | 2.79  | b22o[2+] (0.22) : b22*[2+] (-0.26) |
| 1120.538696 | 2401.9367675781 | 9.57  | y10 (-0.02) : b23-98[2+] (-0.52)   |
| 1121.438477 | 3275.2507324219 | 13.05 | b23-98[2+] (0.37)                  |
| 1122.404175 | 2742.5295410156 | 10.93 |                                    |
| 1123.46936  | 1449.2209472656 | 5.77  |                                    |
| 1135.164795 | 814.2357788086  | 3.24  |                                    |
| 1145.702881 | 1664.8433837891 | 6.63  |                                    |
| 1151.939209 | 1545.0339355469 | 6.15  | a12* (0.38)                        |
| 1153.188965 | 1669.4652099609 | 6.65  | y21[2+] (0.13)                     |
| 1161.871582 | 1146.7966308594 | 4.57  | b23*[2+] (0.32)                    |
| 1167.264404 | 685.2156982422  | 2.73  | x21[2+] (0.21)                     |
| 1178.488525 | 989.1819458008  | 3.94  | b12o (-0.07) : c23[2+] (-0.08)     |
| 1179.635254 | 1097.7213134766 | 4.37  | b12* (0.08)                        |
| 1196.509644 | 4105.208984375  | 16.36 | y22[2+] (-0.05) : b12 (-0.06)      |
| 1197.641235 | 1954.5817871094 | 7.79  |                                    |
| 1198.581543 | 1097.5690917969 | 4.37  |                                    |
| 1217.496582 | 2677.6801757813 | 10.67 | y11 (-0.12)                        |
| 1218.568481 | 1399.4020996094 | 5.57  |                                    |
| 1219.737915 | 869.6668701172  | 3.46  |                                    |
| 1242.422363 | 538.1712036133  | 2.14  |                                    |
| 1260.645264 | 605.3640136719  | 2.41  |                                    |
| 1261.497192 | 429.5872192383  | 1.71  |                                    |
| 1267.432373 | 428.947479248   | 1.70  | x23[2+] (0.32)                     |
| 1268.677124 | 365.2393798828  | 1.45  |                                    |
| 1290.6604   | 387.5652770996  | 1.54  |                                    |
| 1292.511841 | 404.6200256348  | 1.61  | a25*[2+] (0.42)                    |
| 1293.669067 | 1372.8569335938 | 5.47  | b13 (0.04)                         |
| 1314.541016 | 2031.4217529297 | 8.09  | b25[2+] (-0.05)                    |
| 1315.471069 | 1513.2854003906 | 6.03  |                                    |

|             |                  |       |                          |
|-------------|------------------|-------|--------------------------|
| 1316.619995 | 636.854309082,   | 2.53  | y25-98[2+] (0.45)        |
| 1321.138062 | 353.48828125,    | 1.40  | y24[2+] (-0.50)          |
| 1322.919678 | 398.1702270508,  | 1.58  | c25[2+] (-0.18)          |
| 1335.64563  | 395.2705688477,  | 1.57  | x24[2+] (0.00)           |
| 1370.599365 | 425.887878418,   | 1.69  | b26[2+] (-0.53)          |
| 1372.697021 | 427.7807006836,  | 1.70  |                          |
| 1383.584351 | 4659.4555664063, | 18.57 | y13-98 (-0.10)           |
| 1384.587402 | 3427.6328125,    | 13.66 | y12 (-0.03)              |
| 1385.598145 | 1305.1319580078, | 5.20  |                          |
| 1406.601563 | 10870.2734375,   | 43.32 | b14 (-0.10)              |
| 1407.643677 | 9857.33984375,   | 39.28 |                          |
| 1408.624268 | 3419.6982421875, | 13.62 | y26[2+] (-0.04)          |
| 1421.628906 | 1109.4801025391, | 4.42  |                          |
| 1422.646362 | 1606.3610839844, | 6.40  | x26[2+] (-0.02)          |
| 1424.246216 | 319.2674865723,  | 1.27  | c14 (0.50)               |
| 1475.518799 | 326.4415588379,  | 1.30  | a15 (-0.24)              |
| 1481.619263 | 5102.0166015625, | 20.33 | y13 (-0.05)              |
| 1482.549316 | 2887.3845214844, | 11.50 |                          |
| 1483.477051 | 1788.4974365234, | 7.12  |                          |
| 1484.423462 | 554.6848144531,  | 2.21  |                          |
| 1488.085571 | 297.3325805664,  | 1.18  |                          |
| 1549.621094 | 1100.76953125,   | 4.38  |                          |
| 1550.622681 | 309.6314697266,  | 1.23  |                          |
| 1551.919922 | 256.2603759766,  | 1.02  |                          |
| 1572.764404 | 311.6723022461,  | 1.24  | b16-98 (-0.01)           |
| 1574.820313 | 387.0,           | 1.54  |                          |
| 1581.637939 | 284.8191833496,  | 1.13  |                          |
| 1593.958252 | 636.0662841797,  | 2.53  | y15-98 (0.13)            |
| 1595.864868 | 306.8975524902,  | 1.22  |                          |
| 1612.03125  | 387.5637817383,  | 1.54  |                          |
| 1645.226929 | 531.4722290039,  | 2.11  |                          |
| 1674.904419 | 325.5895385742,  | 1.29  | y15* (0.12) : z15 (0.12) |
| 1691.734253 | 668.237487793,   | 2.66  | y15 (-0.07)              |
| 1692.831421 | 422.2815246582,  | 1.68  |                          |
| 1693.858643 | 387.9290771484,  | 1.54  |                          |
| 1859.48584  | 309.962890625,   | 1.23  |                          |
| 1948.954468 | 387.6423034668,  | 1.54  | y17 (0.06) : b19o (0.05) |

T751 and  
S755 (diP)

# ProPhosSI MS/MS report

Mass: 693.283447265625 Charge: 4+

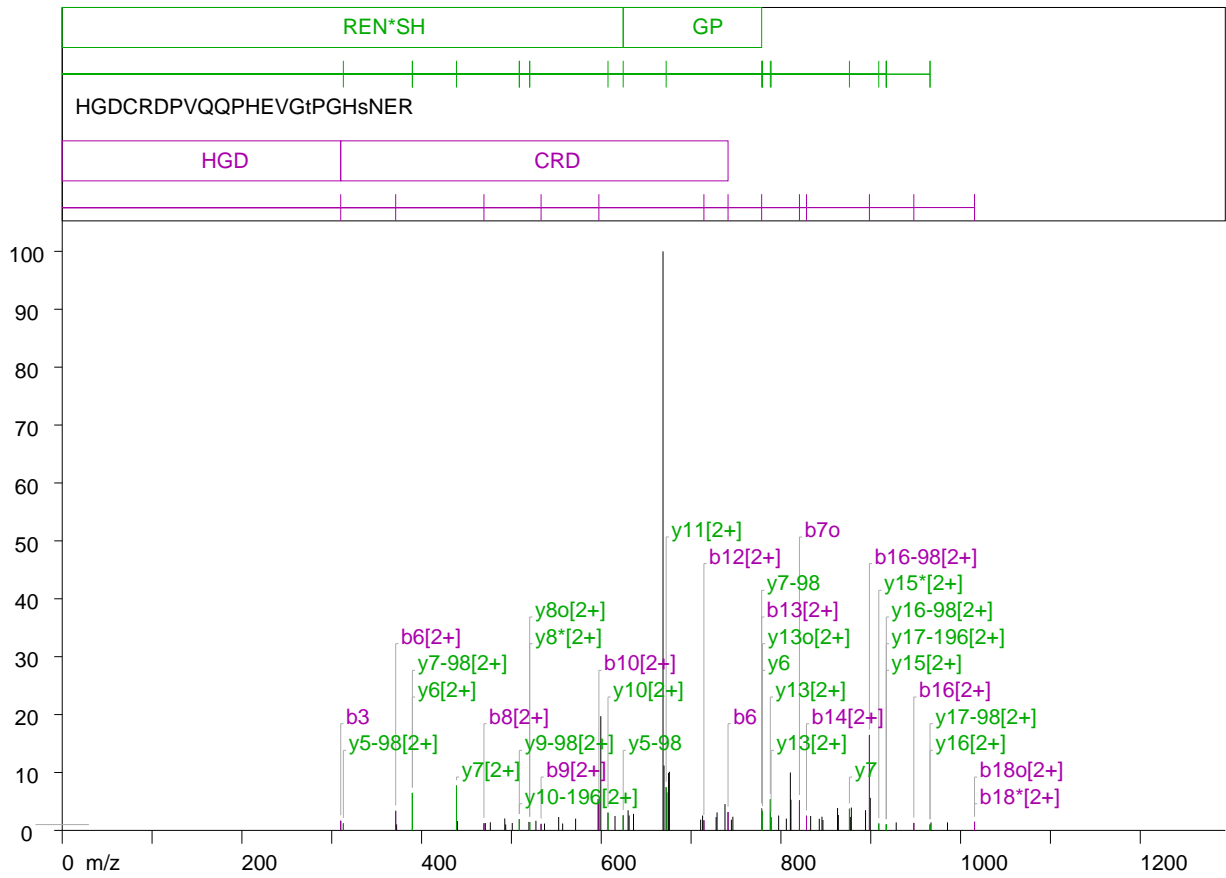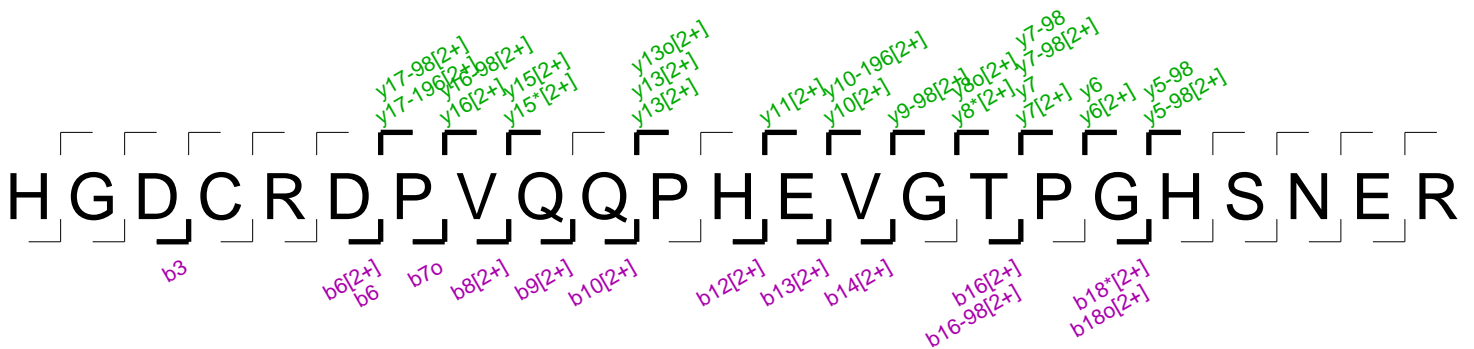

## Cav3.2 Rat

(19) 736 HGDCRDPVQQPHEVGtPGHsNER 758 2768.091 (1.0112) Da

|                         |     |
|-------------------------|-----|
| Parent Ion              | m/z |
| No parent ions observed |     |

### Modifications and supporting evidence

| Position | Residue ID | Modification | Evidence |
|----------|------------|--------------|----------|
| 16       | (751)      | Phospho (ST) |          |
| 20       | (755)      | Phospho (ST) |          |

### Spectrum interpretation

| Rule                                   | passed/tests | Description                                                                                                                                                                                                                                                                                                                                                                                                                                                                                                                                                                                                                                                                                                                                             |
|----------------------------------------|--------------|---------------------------------------------------------------------------------------------------------------------------------------------------------------------------------------------------------------------------------------------------------------------------------------------------------------------------------------------------------------------------------------------------------------------------------------------------------------------------------------------------------------------------------------------------------------------------------------------------------------------------------------------------------------------------------------------------------------------------------------------------------|
| Parent ions present                    | 0/1          | Parent ions corresponding to the parent fragment - 2 phosphate ions were not found                                                                                                                                                                                                                                                                                                                                                                                                                                                                                                                                                                                                                                                                      |
| Three -98 Ions present                 | 1/1          | 5 des-phospho fragment ions were found.                                                                                                                                                                                                                                                                                                                                                                                                                                                                                                                                                                                                                                                                                                                 |
| Unique -98 transitions present         | 1/2          | transition b14 to b16-98, transition y7-98 to y10-196 support unique phosphorylation at position 16<br><br/>No transitions found to support unique phosphorylation at position 20<br><br/>                                                                                                                                                                                                                                                                                                                                                                                                                                                                                                                                                              |
| Four Sequential b or y ions            | 0/1          | Sequence of four y or b ions not observed                                                                                                                                                                                                                                                                                                                                                                                                                                                                                                                                                                                                                                                                                                               |
| Five of six sequential ions present    | 1/1          | Five of Six ions found between b8 and b13<br>Five of Six ions found between b9 and b14                                                                                                                                                                                                                                                                                                                                                                                                                                                                                                                                                                                                                                                                  |
| Proline directed fragmentation pattern | 5/5          | PASS: y17-196> y16-196<br/><br>PASS: b7< b6<br/><br>No proline ions at y13-196<br>PASS: b11< b10<br/><br>PASS: y7-98> y6-98<br/><br>PASS: b17-98< b16-98<br/>                                                                                                                                                                                                                                                                                                                                                                                                                                                                                                                                                                                           |
| PhosphoTyrosine transition present     | 0/0          | 0 of 0 phosphotyrosine transitions were found.                                                                                                                                                                                                                                                                                                                                                                                                                                                                                                                                                                                                                                                                                                          |
| Six of top ten ions identified         | 4/6          | ion 1 (mass: 668.7630615: intensity: 4155.1557617188) assigned 0 times<br>ion 2 (mass: 599.4907227: intensity: 819.8093261719) assigned 0 times<br>ion 3 (mass: 898.4990234: intensity: 685.0337524414) assigned 1 times<br>ion 4 (mass: 669.8388672: intensity: 465.5452270508) assigned 0 times<br>ion 5 (mass: 675.8300781: intensity: 420.7253723145) assigned 0 times<br>ion 6 (mass: 810.5057373: intensity: 415.5160522461) assigned 1 times<br>ion 7 (mass: 674.946228: intensity: 412.3739624023) assigned 0 times<br>ion 8 (mass: 438.8425293: intensity: 321.6818847656) assigned 1 times<br>ion 9 (mass: 672.2565308: intensity: 310.2415161133) assigned 1 times<br>ion 10 (mass: 673.0878906: intensity: 273.4163818359) assigned 0 times |

### Ion Table

34 ions assigned of 76 ions above threshold (44%).

## N-terminal ions

| AA | N-ion | b                                                  | b*                               | b-196    | b-98                              | bo                               |
|----|-------|----------------------------------------------------|----------------------------------|----------|-----------------------------------|----------------------------------|
| H  | 1     | 138.066                                            | 121.040                          | -        | -                                 | 120.056                          |
| G  | 2     | 195.088                                            | 178.061                          | -        | -                                 | 177.077                          |
| D  | 3     | 310.115<br>309.9831238 (1)                         | 293.088                          | -        | -                                 | 292.104                          |
| C  | 4     | 470.145                                            | 453.119                          | -        | -                                 | 452.135                          |
| R  | 5     | 626.246                                            | 609.220                          | -        | -                                 | 608.236                          |
| D  | 6     | 741.273<br>371.1850586 [2+] (3)<br>741.1430664 (3) | 724.247                          | -        | -                                 | 723.263                          |
| P  | 7     | 838.326                                            | 821.300                          | -        | -                                 | 820.316<br>820.6340332 (5)       |
| V  | 8     | 937.395<br>469.4363708 [2+] (1)                    | 920.368                          | -        | -                                 | 919.384                          |
| Q  | 9     | 1065.453<br>533.0302734 [2+] (1)                   | 1048.427                         | -        | -                                 | 1047.443                         |
| Q  | 10    | 1193.512<br>597.3527832 [2+] (4)                   | 1176.485                         | -        | -                                 | 1175.501                         |
| P  | 11    | 1290.564                                           | 1273.538                         | -        | -                                 | 1272.554                         |
| H  | 12    | 1427.623<br>714.2896729 [2+] (1)                   | 1410.597                         | -        | -                                 | 1409.613                         |
| E  | 13    | 1556.666<br>*778.5727539 [2+] (3)                  | 1539.639                         | -        | -                                 | 1538.655                         |
| V  | 14    | 1655.734<br>828.4735107 [2+] (2)                   | 1638.708                         | -        | -                                 | 1637.724                         |
| G  | 15    | 1712.756                                           | 1695.729                         | -        | -                                 | 1694.745                         |
| t  | 16    | 1893.770<br>947.9360352 [2+] (1)                   | 1876.743                         | -        | 1795.784<br>898.4990234 [2+] (16) | 1875.759                         |
| P  | 17    | 1990.823                                           | 1973.796                         | -        | 1892.837                          | 1972.812                         |
| G  | 18    | 2047.844                                           | 2030.818<br>*1015.52124 [2+] (1) | -        | 1949.858                          | 2029.834<br>*1015.52124 [2+] (1) |
| H  | 19    | 2184.903                                           | 2167.876                         | -        | 2086.917                          | 2166.892                         |
| s  | 20    | 2351.901                                           | 2334.875                         | 2155.930 | 2253.915                          | 2333.891                         |
| N  | 21    | 2465.944                                           | 2448.918                         | 2269.972 | 2367.958                          | 2447.934                         |
| E  | 22    | 2594.987                                           | 2577.960                         | 2399.015 | 2497.001                          | 2576.976                         |
| R  | 23    | -                                                  | -                                | -        | -                                 | -                                |

## C-terminal ions

| AA | C-ion | y                                 | y*                                | y-196                             | y-98                              | yo       |
|----|-------|-----------------------------------|-----------------------------------|-----------------------------------|-----------------------------------|----------|
| H  | 23    | -                                 | -                                 | -                                 | -                                 | -        |
| G  | 22    | 2632.040                          | 2615.013                          | 2436.068                          | 2534.054                          | 2614.029 |
| D  | 21    | 2575.018                          | 2557.992                          | 2379.046                          | 2477.032                          | 2557.008 |
| C  | 20    | 2459.991                          | 2442.965                          | 2264.019                          | 2362.005                          | 2441.981 |
| R  | 19    | 2299.961                          | 2282.934                          | 2103.989                          | 2201.975                          | 2281.950 |
| D  | 18    | 2143.859                          | 2126.833                          | 1947.888                          | 2045.874                          | 2125.849 |
| P  | 17    | 2028.833                          | 2011.806                          | 1832.861<br>*917.3342285 [2+] (1) | 1930.847<br>*965.9801025 [2+] (1) | 2010.822 |
| V  | 16    | 1931.780<br>*965.9801025 [2+] (1) | 1914.753                          | 1735.808                          | 1833.794<br>*917.3342285 [2+] (1) | 1913.769 |
| Q  | 15    | 1832.711<br>*917.3342285 [2+] (1) | 1815.685<br>*908.9208984 [2+] (1) | 1636.740                          | 1734.725                          | 1814.701 |



|   |    |                                                         |                                   |                                   |                                                      |                                   |
|---|----|---------------------------------------------------------|-----------------------------------|-----------------------------------|------------------------------------------------------|-----------------------------------|
| - | -  | (1)                                                     | (1)                               | -                                 | -                                                    | -                                 |
| Q | 14 | 1704.653                                                | 1687.626                          | 1508.681                          | 1606.667                                             | 1686.642                          |
| P | 13 | 1576.594<br>789.074585 [2+] (2)<br>788.2208252 [2+] (5) | 1559.568                          | 1380.622                          | 1478.608                                             | 1558.584<br>*779.5186768 [2+] (3) |
| H | 12 | 1479.541                                                | 1462.515                          | 1283.570                          | 1381.555                                             | 1461.531                          |
| E | 11 | 1342.482<br>672.2565308 [2+] (7)                        | 1325.456                          | 1146.511                          | 1244.497                                             | 1324.472                          |
| V | 10 | 1213.440<br>607.5219727 [2+] (3)                        | 1196.413                          | 1017.468<br>*508.8305969 [2+] (1) | 1115.454                                             | 1195.429                          |
| G | 9  | 1114.371                                                | 1097.345                          | 918.400                           | 1016.386<br>*508.8305969 [2+] (1)                    | 1096.361                          |
| t | 8  | 1057.350                                                | 1040.323<br>*520.3566895 [2+] (1) | 861.378                           | 959.364                                              | 1039.339<br>*520.3566895 [2+] (1) |
| P | 7  | 876.336<br>438.8425293 [2+] (7)<br>876.2609863 (3)      | 859.309                           | -                                 | 778.350<br>*389.7758179 [2+] (6)<br>*778.5727539 (3) | 858.325                           |
| G | 6  | 779.283<br>*389.7758179 [2+] (6)<br>*779.5186768 (3)    | 762.257                           | -                                 | 681.297                                              | 761.273                           |
| H | 5  | 722.262                                                 | 705.235                           | -                                 | 624.276<br>312.9263306 [2+] (1)<br>624.4439697 (2)   | 704.251                           |
| s | 4  | 585.203                                                 | 568.176                           | -                                 | 487.217                                              | 567.192                           |
| N | 3  | 418.205                                                 | 401.178                           | -                                 | -                                                    | 400.194                           |
| E | 2  | 304.162                                                 | 287.135                           | -                                 | -                                                    | 286.151                           |
| R | 1  | 175.119                                                 | 158.092                           | -                                 | -                                                    | 157.108                           |

## Ion distribution

| Threshold | Ion count | Matches | % matched |
|-----------|-----------|---------|-----------|
| 0         | 128       | 58      | 45        |
| 0.5       | 98        | 48      | 48        |
| 1         | 76        | 34      | 44        |
| 2         | 47        | 20      | 42        |
| 3         | 29        | 14      | 48        |
| 4         | 18        | 8       | 44        |
| 5         | 16        | 7       | 43        |
| 10        | 5         | 1       | 20        |

## Observed ions > 1%

| m/z         | Intensity       | % max | Assignment (delta) |
|-------------|-----------------|-------|--------------------|
| 309.9831238 | 69.4563598633,  | 1.67  | b3 (-0.13)         |
| 312.9263306 | 50.5426673889,  | 1.21  | y5-98[2+] (0.28)   |
| 371.1850586 | 140.3555145264, | 3.37  | b6[2+] (0.04)      |
| 372.2175293 | 42.8466644287,  | 1.03  |                    |

|             |                  |       |                                                   |
|-------------|------------------|-------|---------------------------------------------------|
| 389.7758179 | 269.0838928223,  | 6.47  | y7-98[2+] (0.09) : y6[2+] (-0.36)                 |
| 438.8425293 | 321.6818847656,  | 7.74  | y7[2+] (0.17)                                     |
| 439.939209  | 66.6861572266,   | 1.60  |                                                   |
| 469.4363708 | 51.3587112427,   | 1.23  | b8[2+] (0.23)                                     |
| 470.9847412 | 52.7133369446,   | 1.26  |                                                   |
| 476.5460815 | 58.3299064636,   | 1.40  |                                                   |
| 492.6200256 | 85.4259185791,   | 2.05  |                                                   |
| 493.65802   | 42.7322044373,   | 1.02  |                                                   |
| 500.9525146 | 53.071685791,    | 1.27  |                                                   |
| 508.8305969 | 79.768913269,    | 1.91  | y9-98[2+] (0.13) : y10-196[2+] (-0.40)            |
| 519.5135498 | 60.8690948486,   | 1.46  | a9[2+] (0.28)                                     |
| 520.3566895 | 60.0385055542,   | 1.44  | y8o[2+] (0.18) : y8*[2+] (-0.30) : z8[2+] (-0.30) |
| 527.2824097 | 69.0523147583,   | 1.66  |                                                   |
| 533.0302734 | 46.9843444824,   | 1.13  | b9[2+] (-0.20)                                    |
| 536.836731  | 48.9677314758,   | 1.17  |                                                   |
| 552.6207275 | 95.9638519287,   | 2.30  |                                                   |
| 557.0321045 | 49.5355987549,   | 1.19  |                                                   |
| 571.4836426 | 84.1955871582,   | 2.02  | x9[2+] (-0.20)                                    |
| 596.4904785 | 225.4528503418,  | 5.42  |                                                   |
| 597.3527832 | 205.8546142578,  | 4.95  | b10[2+] (0.09)                                    |
| 599.4907227 | 819.8093261719,  | 19.72 |                                                   |
| 607.5219727 | 127.357460022,   | 3.06  | y10[2+] (0.29)                                    |
| 615.3198242 | 103.3620986938,  | 2.48  |                                                   |
| 624.4439697 | 108.1364440918,  | 2.60  | y5-98 (0.16)                                      |
| 629.8970947 | 144.3395843506,  | 3.47  |                                                   |
| 631.0152588 | 107.2310943604,  | 2.58  |                                                   |
| 635.9099731 | 118.78175354,    | 2.85  |                                                   |
| 668.7630615 | 4155.1557617188, | 100   |                                                   |
| 669.8388672 | 465.5452270508,  | 11.20 |                                                   |
| 672.2565308 | 310.2415161133,  | 7.46  | y11[2+] (0.51)                                    |
| 673.0878906 | 273.4163818359,  | 6.58  |                                                   |
| 674.946228  | 412.3739624023,  | 9.92  |                                                   |
| 675.8300781 | 420.7253723145,  | 10.12 |                                                   |
| 710.6611328 | 77.2244338989,   | 1.85  |                                                   |
| 712.8208008 | 106.8268051147,  | 2.57  | a6 (-0.45)                                        |
| 714.2896729 | 72.7416610718,   | 1.75  | b12[2+] (-0.02)                                   |
| 727.8768311 | 95.263458252,    | 2.29  |                                                   |
| 728.9116211 | 129.1722412109,  | 3.10  |                                                   |
| 737.7255859 | 189.1473999023,  | 4.55  |                                                   |
| 741.1430664 | 131.5450439453,  | 3.16  | b6 (-0.13)                                        |
| 744.8671875 | 76.7989425659,   | 1.84  |                                                   |
| 746.5366211 | 98.2234954834,   | 2.36  |                                                   |
| 778.5727539 | 156.2082366943,  | 3.75  | y7-98 (0.22) : b13[2+] (-0.26)                    |

|             |                             |       |                                                          |
|-------------|-----------------------------|-------|----------------------------------------------------------|
| 779.5186768 | 136.8725738525 <sub>3</sub> | 3.29  | y6 (0.23) : y13o[2+] (-0.27)                             |
| 788.2208252 | 223.2155761719 <sub>3</sub> | 5.37  | y13[2+] (-0.58)                                          |
| 789.074585  | 94.1781311035 <sub>3</sub>  | 2.26  | y13[2+] (0.27)                                           |
| 797.4675293 | 106.5665664673 <sub>3</sub> | 2.56  |                                                          |
| 806.0413818 | 84.8803634644 <sub>3</sub>  | 2.04  | a14*[2+] (0.18)                                          |
| 810.5057373 | 415.5160522461 <sub>3</sub> | 10.00 | a7 (0.17)                                                |
| 811.137207  | 219.9296722412 <sub>3</sub> | 5.29  |                                                          |
| 820.6340332 | 215.837020874 <sub>3</sub>  | 5.19  | b7o (0.31)                                               |
| 828.4735107 | 105.4101409912 <sub>3</sub> | 2.53  | b14[2+] (0.10)                                           |
| 833.1070557 | 103.4379577637 <sub>3</sub> | 2.48  |                                                          |
| 842.720459  | 83.1171722412 <sub>3</sub>  | 2.00  | a15[2+] (-0.16)                                          |
| 845.692749  | 98.1510467529 <sub>3</sub>  | 2.36  |                                                          |
| 846.7583008 | 74.4253845215 <sub>3</sub>  | 1.79  |                                                          |
| 863.0344238 | 160.5730438232 <sub>3</sub> | 3.86  |                                                          |
| 863.9208984 | 110.7651138306 <sub>3</sub> | 2.66  |                                                          |
| 876.2609863 | 155.5384063721 <sub>3</sub> | 3.74  | y7 (-0.07)                                               |
| 877.2878418 | 96.4859161377 <sub>3</sub>  | 2.32  |                                                          |
| 878.3717041 | 163.8325042725 <sub>3</sub> | 3.94  |                                                          |
| 894.1898193 | 145.2952270508 <sub>3</sub> | 3.49  |                                                          |
| 898.4990234 | 685.0337524414 <sub>3</sub> | 16.48 | b16-98[2+] (0.10)                                        |
| 899.4471436 | 233.7209777832 <sub>3</sub> | 5.62  |                                                          |
| 908.9208984 | 49.6068878174 <sub>3</sub>  | 1.19  | y15*[2+] (0.57) : z15[2+] (0.57) : a8 (-0.47)            |
| 917.3342285 | 42.8846969604 <sub>3</sub>  | 1.03  | y15[2+] (0.47) : y17-196[2+] (0.39) : y16-98[2+] (-0.06) |
| 928.3449707 | 57.3900756836 <sub>3</sub>  | 1.38  |                                                          |
| 947.9360352 | 53.4932022095 <sub>3</sub>  | 1.28  | b16[2+] (0.54)                                           |
| 965.9801025 | 42.1849517822 <sub>3</sub>  | 1.01  | y17-98[2+] (0.05) : y16[2+] (-0.41)                      |
| 967.0377197 | 57.5638427734 <sub>3</sub>  | 1.38  |                                                          |
| 985.4520264 | 57.4435691833 <sub>3</sub>  | 1.38  |                                                          |
| 1015.52124  | 61.6691894531 <sub>3</sub>  | 1.48  | b18o[2+] (0.10) : b18*[2+] (-0.39)                       |

T751



## Cav3.2 Rat

(40) 736 HGDCRDPVQQPHEVGtPGHSNER 758 2688.124 (-0.0012) Da

|                         |     |
|-------------------------|-----|
| Parent Ion              | m/z |
| No parent ions observed |     |

### Modifications and supporting evidence

| Position | Residue ID | Modification | Evidence          |
|----------|------------|--------------|-------------------|
| 16       | (751)      | Phospho (ST) | b15 => b16-98[2+] |

### Spectrum interpretation

| Rule                                   | passed/tests | Description                                                                                                                                                                                                                                                                                                                                                                                                                                                                                                                                                                                                                                                        |
|----------------------------------------|--------------|--------------------------------------------------------------------------------------------------------------------------------------------------------------------------------------------------------------------------------------------------------------------------------------------------------------------------------------------------------------------------------------------------------------------------------------------------------------------------------------------------------------------------------------------------------------------------------------------------------------------------------------------------------------------|
| Parent ions present                    | 0/1          | Parent ions corresponding to the parent fragment - 1 phosphate ions were not found                                                                                                                                                                                                                                                                                                                                                                                                                                                                                                                                                                                 |
| Three -98 Ions present                 | 1/1          | 9 des-phospho fragment ions were found.                                                                                                                                                                                                                                                                                                                                                                                                                                                                                                                                                                                                                            |
| Unique -98 transitions present         | 1/1          | transition b15 to b16-98, transition y7 to y10-98 support unique phosphorylation at position 16<br><br/>                                                                                                                                                                                                                                                                                                                                                                                                                                                                                                                                                           |
| Four Sequential b or y ions            | 1/1          | Sequence of four b ions found from b12 to b15.                                                                                                                                                                                                                                                                                                                                                                                                                                                                                                                                                                                                                     |
| Five of six sequential ions present    | 1/1          | Five of Six ions found between b9 and b14<br>Five of Six ions found between b10 and b15<br>Five of Six ions found between b11 and b16<br>Five of Six ions found between b12 and b17<br>Five of Six ions found between b13 and b18                                                                                                                                                                                                                                                                                                                                                                                                                                  |
| Proline directed fragmentation pattern | 6/6          | PASS: y17-98> y16-98<br/><br>PASS: b7< b6<br/><br>PASS: y13-98> y12-98<br/><br>PASS: b11< b10<br/><br>PASS: y7> y6<br/><br>PASS: b17-98< b16-98<br/>                                                                                                                                                                                                                                                                                                                                                                                                                                                                                                               |
| PhosphoTyrosine transition present     | 0/0          | 0 of 0 phosphotyrosine transitions were found.                                                                                                                                                                                                                                                                                                                                                                                                                                                                                                                                                                                                                     |
| Six of top ten ions identified         | 8/6          | ion 1 (mass: 883.499: intensity: 1145.12)<br>assigned 0 times<br>ion 2 (mass: 796.290: intensity: 1121.90)<br>assigned 1 times<br>ion 3 (mass: 741.158: intensity: 910.92)<br>assigned 1 times<br>ion 4 (mass: 1656.173: intensity: 673.28)<br>assigned 1 times<br>ion 5 (mass: 828.590: intensity: 673.28)<br>assigned 1 times<br>ion 6 (mass: 925.923: intensity: 669.60)<br>assigned 2 times<br>ion 7 (mass: 1852.111: intensity: 573.51)<br>assigned 1 times<br>ion 8 (mass: 926.559: intensity: 573.51)<br>assigned 1 times<br>ion 9 (mass: 975.233: intensity: 497.10)<br>assigned 2 times<br>ion 10 (mass: 1593.719: intensity: 446.22)<br>assigned 0 times |

### Ion Table

48 ions assigned of 98 ions above threshold (48%).

#### N-terminal ions

| AA | N-ion | b       | b*      | b-98 | bo      |
|----|-------|---------|---------|------|---------|
| H  | 1     | 138.066 | 121.040 | -    | 120.056 |
| G  | 2     | 195.088 | 178.061 | -    | 177.077 |

|   |    |                                                  |                        |                                |                           |
|---|----|--------------------------------------------------|------------------------|--------------------------------|---------------------------|
| D | 3  | 310.115<br>309.931 (6)                           | 293.088                | -                              | 292.104<br>292.031 (6)    |
| C | 4  | 470.145                                          | 453.119<br>453.291 (2) | -                              | 452.135                   |
| R | 5  | 626.246<br>626.249 (5)                           | 609.220                | -                              | 608.236                   |
| D | 6  | 741.273<br>741.158 (79)                          | 724.247                | -                              | 723.263                   |
| P | 7  | 838.326                                          | 821.300                | -                              | 820.316                   |
| V | 8  | 937.395                                          | 920.368                | -                              | 919.384                   |
| Q | 9  | 1065.453<br>1065.525 (7)<br>*533.248 [2+] (5)    | 1048.427               | -                              | 1047.443                  |
| Q | 10 | 1193.512<br>*1193.393 (17)<br>597.497 [2+] (18)  | 1176.485               | -                              | 1175.501<br>1175.460 (5)  |
| P | 11 | 1290.564                                         | 1273.538               | -                              | 1272.554                  |
| H | 12 | 1427.623<br>*714.462 [2+] (13)<br>*1427.916 (13) | 1410.597               | -                              | 1409.613                  |
| E | 13 | 1556.666<br>1556.513 (22)<br>*779.436 [2+] (28)  | 1539.639               | -                              | 1538.655<br>1538.991 (13) |
| V | 14 | 1655.734<br>1656.173 (58)<br>828.590 [2+] (58)   | 1638.708               | -                              | 1637.724                  |
| G | 15 | 1712.756<br>1713.179 (7)                         | 1695.729               | -                              | 1694.745                  |
| t | 16 | 1893.770<br>1893.460 (7)                         | 1876.743               | 1795.784<br>898.598 [2+] (24)  | 1875.759                  |
| P | 17 | 1990.823                                         | 1973.796               | 1892.837                       | 1972.812                  |
| G | 18 | 2047.844                                         | 2030.818               | 1949.858<br>*975.233 [2+] (43) | 2029.834                  |
| H | 19 | 2184.903                                         | 2167.876               | 2086.917                       | 2166.892                  |
| S | 20 | 2271.935                                         | 2254.909               | 2173.949                       | 2253.924                  |
| N | 21 | 2385.978<br>*1193.393 [2+] (17)                  | 2368.951               | 2287.992                       | 2367.967                  |
| E | 22 | 2515.021                                         | 2497.994               | 2417.035<br>1209.376 [2+] (10) | 2497.010                  |
| R | 23 | -                                                | -                      | -                              | -                         |

### C-terminal ions

| AA | C-ion | y                                                                    | y*                        | y-98                           | yo                            |
|----|-------|----------------------------------------------------------------------|---------------------------|--------------------------------|-------------------------------|
| H  | 23    | -                                                                    | -                         | -                              | -                             |
| G  | 22    | 2552.073                                                             | 2535.047                  | 2454.087                       | 2534.063                      |
| D  | 21    | 2495.052                                                             | 2478.025                  | 2397.066<br>1199.295 [2+] (10) | 2477.041                      |
| C  | 20    | 2380.025<br>2380.536 (26)<br>1190.772 [2+] (26)                      | 2362.998                  | 2282.039<br>1141.575 [2+] (15) | 2362.014                      |
| R  | 19    | 2219.994                                                             | 2202.968                  | 2122.008                       | 2201.984                      |
| D  | 18    | 2063.893                                                             | 2046.867<br>*2046.665 (6) | 1965.907<br>1966.402 (6)       | 2045.883                      |
| P  | 17    | 1948.866<br>*975.233 [2+] (43)                                       | 1931.840                  | 1850.880<br>*925.923 [2+] (58) | 1930.856                      |
| V  | 16    | 1851.813<br>1852.111 (50)<br>*925.923 [2+] (58)<br>926.559 [2+] (50) | 1834.787                  | 1753.828                       | 1833.803<br>917.251 [2+] (21) |

|   |    |                                                                   |                           |                                                  |                           |
|---|----|-------------------------------------------------------------------|---------------------------|--------------------------------------------------|---------------------------|
| Q | 15 | 1752.745                                                          | 1735.718                  | 1654.759                                         | 1734.734<br>1735.081 (2)  |
| Q | 14 | 1624.686<br>1624.537 (3)                                          | 1607.660                  | 1526.701                                         | 1606.676                  |
| P | 13 | 1496.628<br>1496.914 (11)<br>748.961 [2+] (11)                    | 1479.601                  | 1398.642<br>*1399.134 (18)<br>*700.071 [2+] (18) | 1478.617                  |
| H | 12 | 1399.575<br>*1399.134 (18)<br>*700.071 [2+] (18)<br>*1399.596 (5) | 1382.549<br>*1382.266 (5) | 1301.589                                         | 1381.565<br>*1381.537 (4) |
| E | 11 | 1262.516                                                          | 1245.490                  | 1164.530                                         | 1244.506                  |
| V | 10 | 1133.474<br>1133.292 (13)<br>567.445 [2+] (4)                     | 1116.447                  | 1035.488<br>1035.902 (9)<br>1035.088 (10)        | 1115.463                  |
| G | 9  | 1034.405                                                          | 1017.379                  | 936.419                                          | 1016.395                  |
| t | 8  | 977.384                                                           | 960.357                   | 879.398                                          | 959.373                   |
| P | 7  | 796.370<br>796.290 (97)                                           | 779.343<br>*779.436 (28)  | -                                                | 778.359                   |
| G | 6  | 699.317                                                           | 682.290                   | -                                                | 681.306                   |
| H | 5  | 642.295                                                           | 625.269                   | -                                                | 624.285                   |
| S | 4  | 505.237<br>505.237 (3)                                            | 488.210                   | -                                                | 487.226                   |
| N | 3  | 418.205                                                           | 401.178                   | -                                                | 400.194                   |
| E | 2  | 304.162                                                           | 287.135                   | -                                                | 286.151                   |
| R | 1  | 175.119                                                           | 158.092                   | -                                                | 157.108                   |

### Ion distribution

| Threshold | Ion count | Matches | % matched |
|-----------|-----------|---------|-----------|
| 0         | 116       | 54      | 46        |
| 0.5       | 116       | 54      | 46        |
| 1         | 112       | 54      | 48        |
| 2         | 98        | 48      | 48        |
| 3         | 84        | 46      | 54        |
| 4         | 77        | 44      | 57        |
| 5         | 72        | 42      | 58        |
| 10        | 42        | 29      | 69        |

### Observed ions > 1%

| m/z     | Intensity          | % max | Assignment (delta) |
|---------|--------------------|-------|--------------------|
| 292.031 | 70.77 <sub>s</sub> | 6.18  | b3o (-0.07)        |
| 309.931 | 77.20 <sub>s</sub> | 6.74  | b3 (-0.18)         |
| 334.928 | 13.07 <sub>s</sub> | 1.14  |                    |
| 361.111 | 23.83 <sub>s</sub> | 2.08  |                    |
| 364.048 | 15.70 <sub>s</sub> | 1.37  | x6[2+] (-0.11)     |
| 368.327 | 21.19 <sub>s</sub> | 1.85  |                    |
| 432.189 | 93.88 <sub>s</sub> | 8.19  |                    |
| 447.226 | 16.51 <sub>s</sub> | 1.44  | a8*[2+] (0.53)     |
| 453.291 | 24.75 <sub>s</sub> | 2.16  | b4* (0.17)         |



|          |                      |       |                                                       |
|----------|----------------------|-------|-------------------------------------------------------|
| 483.306  | 20.95 <sub>s</sub>   | 1.82  |                                                       |
| 487.104  | 21.72 <sub>s</sub>   | 1.89  | c4 (-0.06) : y4o (-0.12)                              |
| 504.102  | 26.96 <sub>s</sub>   | 2.35  |                                                       |
| 505.237  | 39.21 <sub>s</sub>   | 3.42  | y4 (-6.50)                                            |
| 533.248  | 61.98 <sub>s</sub>   | 5.41  | b9[2+] (0.01) : x4 (0.01)                             |
| 559.843  | 32.18 <sub>s</sub>   | 2.81  |                                                       |
| 567.445  | 49.34 <sub>s</sub>   | 4.30  | y10[2+] (0.20)                                        |
| 597.497  | 215.24 <sub>s</sub>  | 18.79 | b10[2+] (0.23)                                        |
| 603.481  | 55.78 <sub>s</sub>   | 4.87  |                                                       |
| 614.264  | 49.76 <sub>s</sub>   | 4.34  |                                                       |
| 626.249  | 62.71 <sub>s</sub>   | 5.47  | b5 (0.00)                                             |
| 644.211  | 44.46 <sub>s</sub>   | 3.88  |                                                       |
| 700.071  | 215.04 <sub>s</sub>  | 18.77 | y13-98[2+] (0.24) : y12[2+] (-0.22) : a12[2+] (-0.24) |
| 714.462  | 158.30 <sub>s</sub>  | 13.82 | x12[2+] (0.17) : b12[2+] (0.14)                       |
| 741.158  | 910.92 <sub>s</sub>  | 79.54 | b6 (-0.11)                                            |
| 748.961  | 137.15 <sub>s</sub>  | 11.97 | y13[2+] (0.14)                                        |
| 755.848  | 126.81 <sub>s</sub>  | 11.07 | a13o[2+] (0.01) : a13*[2+] (-0.47)                    |
| 761.838  | 259.56 <sub>s</sub>  | 22.66 |                                                       |
| 779.436  | 328.49 <sub>s</sub>  | 28.68 | b13[2+] (0.59) : y7* (0.09) : z7 (0.09)               |
| 796.290  | 1121.90 <sub>s</sub> | 97.97 | y7 (-0.08)                                            |
| 797.363  | 446.22 <sub>s</sub>  | 38.96 |                                                       |
| 828.590  | 673.28 <sub>s</sub>  | 58.79 | b14[2+] (0.21)                                        |
| 852.639  | 346.78 <sub>s</sub>  | 30.28 |                                                       |
| 853.417  | 301.04 <sub>s</sub>  | 26.28 |                                                       |
| 883.499  | 1145.12 <sub>s</sub> | 100   |                                                       |
| 885.261  | 263.87 <sub>s</sub>  | 23.04 |                                                       |
| 898.598  | 280.76 <sub>s</sub>  | 24.51 | b16-98[2+] (0.20)                                     |
| 917.251  | 245.69 <sub>s</sub>  | 21.45 | y16o[2+] (-0.15)                                      |
| 925.923  | 669.60 <sub>s</sub>  | 58.47 | y17-98[2+] (-0.02) : y16[2+] (-0.48)                  |
| 926.559  | 573.51 <sub>s</sub>  | 50.08 | y16[2+] (0.14)                                        |
| 975.233  | 497.10 <sub>s</sub>  | 43.41 | y17[2+] (0.29) : b18-98[2+] (-0.20)                   |
| 1000.783 | 84.86 <sub>s</sub>   | 7.41  |                                                       |
| 1035.088 | 119.53 <sub>s</sub>  | 10.43 | y10-98 (-0.40)                                        |
| 1035.902 | 104.94 <sub>s</sub>  | 9.16  | y10-98 (0.41)                                         |
| 1053.313 | 93.25 <sub>s</sub>   | 8.14  |                                                       |
| 1065.525 | 81.94 <sub>s</sub>   | 7.15  | b9 (0.07)                                             |
| 1078.245 | 59.26 <sub>s</sub>   | 5.17  |                                                       |
| 1133.292 | 157.00 <sub>s</sub>  | 13.71 | y10 (-0.18)                                           |
| 1141.575 | 173.70 <sub>s</sub>  | 15.16 | y20-98[2+] (0.05)                                     |
| 1142.465 | 409.29 <sub>s</sub>  | 35.74 |                                                       |
| 1150.340 | 63.96 <sub>s</sub>   | 5.58  |                                                       |
| 1175.460 | 61.24 <sub>s</sub>   | 5.34  | b10o (-0.04)                                          |
| 1190.772 | 306.10 <sub>s</sub>  | 26.73 | y20[2+] (0.25)                                        |

|          |                     |       |                                           |
|----------|---------------------|-------|-------------------------------------------|
| 1191.815 | 70.15 <sub>,</sub>  | 6.12  |                                           |
| 1193.393 | 198.16 <sub>,</sub> | 17.30 | b21[2+] (-0.10) : b10 (-0.11)             |
| 1199.295 | 121.01 <sub>,</sub> | 10.56 | y21-98[2+] (0.25)                         |
| 1200.794 | 70.88 <sub>,</sub>  | 6.18  |                                           |
| 1209.376 | 118.67 <sub>,</sub> | 10.36 | b22-98[2+] (0.35)                         |
| 1291.699 | 25.69 <sub>,</sub>  | 2.24  |                                           |
| 1344.645 | 29.20 <sub>,</sub>  | 2.54  |                                           |
| 1346.928 | 27.04 <sub>,</sub>  | 2.36  |                                           |
| 1348.792 | 24.72 <sub>,</sub>  | 2.15  |                                           |
| 1380.564 | 27.89 <sub>,</sub>  | 2.43  |                                           |
| 1381.537 | 53.75 <sub>,</sub>  | 4.69  | y12o (-0.02) : a12o (-0.08)               |
| 1382.266 | 59.95 <sub>,</sub>  | 5.23  | y12* (-0.28) : z12 (-0.28) : a12* (-0.33) |
| 1399.134 | 215.04 <sub>,</sub> | 18.77 | y13-98 (0.49) : y12 (-0.44) : a12 (-0.49) |
| 1399.596 | 58.15 <sub>,</sub>  | 5.07  | y12 (0.02) : a12 (-0.03)                  |
| 1400.797 | 46.42 <sub>,</sub>  | 4.05  |                                           |
| 1427.916 | 158.30 <sub>,</sub> | 13.82 | x12 (0.34) : b12 (0.29)                   |
| 1445.815 | 74.67 <sub>,</sub>  | 6.52  |                                           |
| 1496.914 | 137.15 <sub>,</sub> | 11.97 | y13 (0.28)                                |
| 1538.991 | 159.46 <sub>,</sub> | 13.92 | b13o (0.33)                               |
| 1544.057 | 33.60 <sub>,</sub>  | 2.93  |                                           |
| 1556.513 | 258.58 <sub>,</sub> | 22.58 | b13 (-0.15)                               |
| 1571.800 | 41.56 <sub>,</sub>  | 3.62  |                                           |
| 1586.340 | 85.19 <sub>,</sub>  | 7.43  |                                           |
| 1593.719 | 446.22 <sub>,</sub> | 38.96 |                                           |
| 1624.537 | 44.27 <sub>,</sub>  | 3.86  | y14 (-0.14)                               |
| 1636.876 | 72.62 <sub>,</sub>  | 6.34  |                                           |
| 1656.173 | 673.28 <sub>,</sub> | 58.79 | b14 (0.43)                                |
| 1665.568 | 44.36 <sub>,</sub>  | 3.87  |                                           |
| 1671.867 | 91.98 <sub>,</sub>  | 8.03  |                                           |
| 1705.826 | 301.04 <sub>,</sub> | 26.28 |                                           |
| 1713.179 | 87.36 <sub>,</sub>  | 7.62  | b15 (0.42)                                |
| 1735.081 | 24.94 <sub>,</sub>  | 2.17  | y15o (0.34)                               |
| 1751.505 | 91.11 <sub>,</sub>  | 7.95  |                                           |
| 1761.178 | 146.92 <sub>,</sub> | 12.83 |                                           |
| 1769.515 | 263.87 <sub>,</sub> | 23.04 |                                           |
| 1814.187 | 69.70 <sub>,</sub>  | 6.08  |                                           |
| 1835.532 | 123.87 <sub>,</sub> | 10.81 |                                           |
| 1852.111 | 573.51 <sub>,</sub> | 50.08 | y16 (0.29)                                |
| 1853.996 | 65.14 <sub>,</sub>  | 5.68  |                                           |
| 1868.529 | 236.72 <sub>,</sub> | 20.67 |                                           |
| 1893.460 | 80.98 <sub>,</sub>  | 7.07  | b16 (-0.31)                               |
| 1909.335 | 31.08 <sub>,</sub>  | 2.71  |                                           |
| 1916.888 | 18.45 <sub>,</sub>  | 1.61  |                                           |

|          |                     |       |                            |
|----------|---------------------|-------|----------------------------|
| 1930.229 | 40.43 <sub>,</sub>  | 3.53  |                            |
| 1933.983 | 70.92 <sub>,</sub>  | 6.19  |                            |
| 1966.402 | 70.53 <sub>,</sub>  | 6.15  | y18-98 (0.49)              |
| 1967.720 | 45.17 <sub>,</sub>  | 3.94  |                            |
| 2033.727 | 13.47 <sub>,</sub>  | 1.17  |                            |
| 2037.118 | 13.97 <sub>,</sub>  | 1.21  |                            |
| 2046.665 | 71.15 <sub>,</sub>  | 6.21  | z18 (-0.20) : y18* (-0.20) |
| 2086.848 | 20.62 <sub>,</sub>  | 1.80  | b19-98 (-0.06)             |
| 2090.610 | 20.46 <sub>,</sub>  | 1.78  |                            |
| 2122.490 | 12.52 <sub>,</sub>  | 1.09  | y19-98 (0.48)              |
| 2130.042 | 81.94 <sub>,</sub>  | 7.15  |                            |
| 2157.090 | 14.28 <sub>,</sub>  | 1.24  | a19 (0.18)                 |
| 2197.975 | 24.08 <sub>,</sub>  | 2.10  |                            |
| 2258.034 | 22.36 <sub>,</sub>  | 1.95  |                            |
| 2325.719 | 28.91 <sub>,</sub>  | 2.52  |                            |
| 2364.101 | 62.43 <sub>,</sub>  | 5.45  |                            |
| 2380.536 | 306.10 <sub>,</sub> | 26.73 | y20 (0.51)                 |

S755

# ProPhosSI MS/MS report

Mass: 897.049057 Charge: 3+

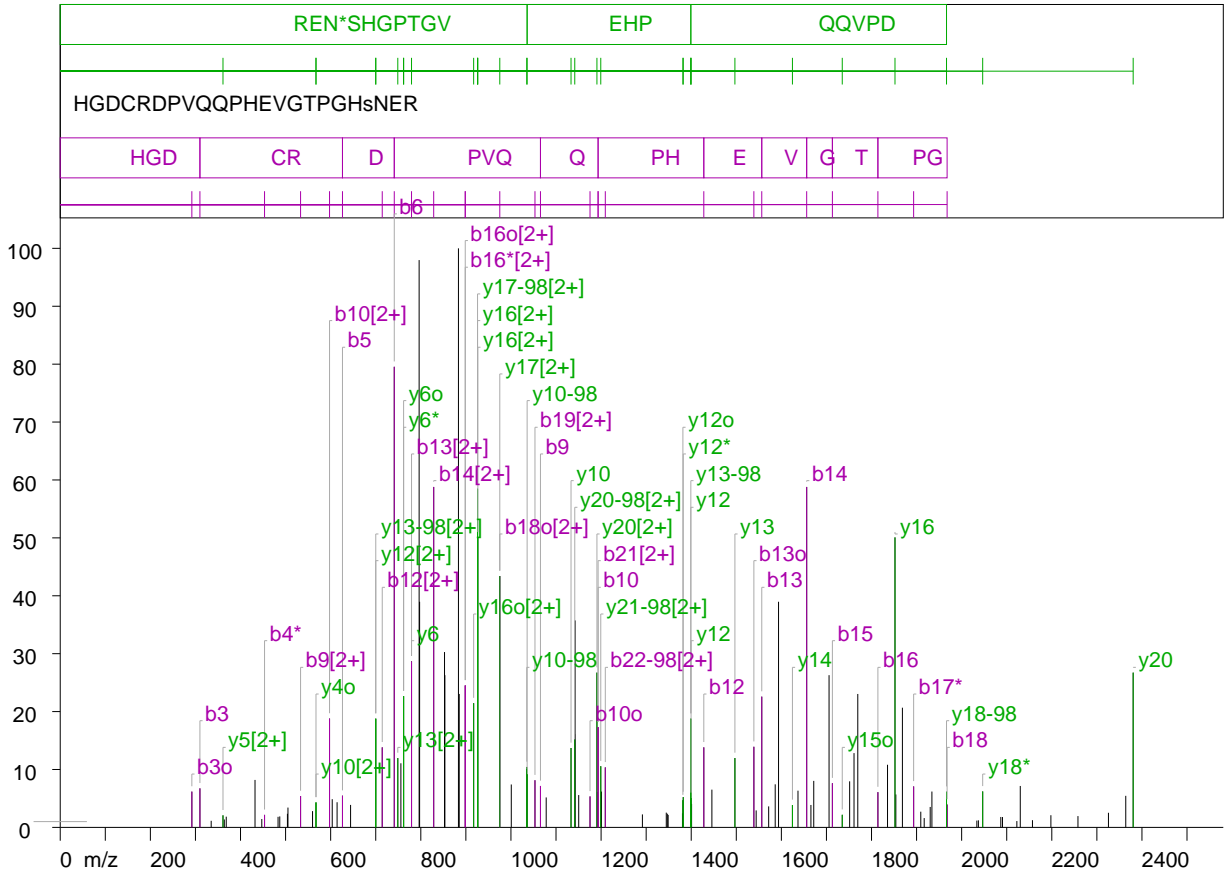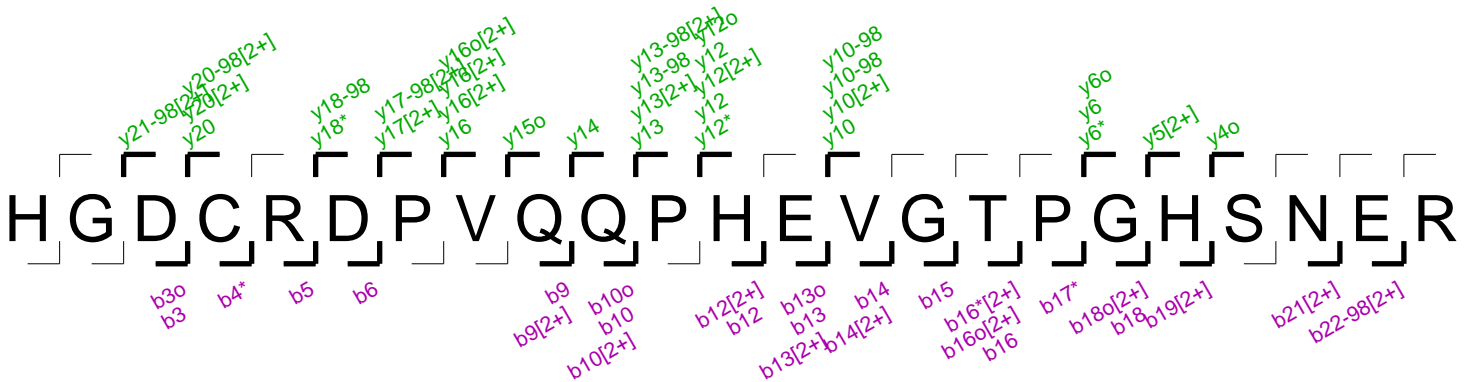

## Cav3.2 Rat

(40) 736 HGDCRDPVQQPHEVGTSGHsNER 758 2688.124 (-0.0012) Da

|                         |     |
|-------------------------|-----|
| Parent Ion              | m/z |
| No parent ions observed |     |

## Modifications and supporting evidence

| Position | Residue ID | Modification | Evidence            |
|----------|------------|--------------|---------------------|
| 20       | (755)      | Phospho (ST) | b19[2+]=>b22-98[2+] |

## Spectrum interpretation

| Rule                                   | passed/tests | Description                                                                                                                                                                                                                                                                                                                                                                                                                                                                                                                                                                                                                                                        |
|----------------------------------------|--------------|--------------------------------------------------------------------------------------------------------------------------------------------------------------------------------------------------------------------------------------------------------------------------------------------------------------------------------------------------------------------------------------------------------------------------------------------------------------------------------------------------------------------------------------------------------------------------------------------------------------------------------------------------------------------|
| Parent ions present                    | 0/1          | Parent ions corresponding to the parent fragment - 1 phosphate ions were not found                                                                                                                                                                                                                                                                                                                                                                                                                                                                                                                                                                                 |
| Three -98 Ions present                 | 1/1          | 7 des-phospho fragment ions were found.                                                                                                                                                                                                                                                                                                                                                                                                                                                                                                                                                                                                                            |
| Unique -98 transitions present         | 1/1          | transition b19 to b22-98 support unique phosphorylation at position 20<br><br/>                                                                                                                                                                                                                                                                                                                                                                                                                                                                                                                                                                                    |
| Four Sequential b or y ions            | 1/1          | Sequence of four b ions found from b12 to b15.                                                                                                                                                                                                                                                                                                                                                                                                                                                                                                                                                                                                                     |
| Five of six sequential ions present    | 1/1          | Five of Six ions found between b9 and b14<br>Five of Six ions found between b10 and b15<br>Five of Six ions found between b11 and b16<br>Five of Six ions found between b12 and b17<br>Five of Six ions found between b13 and b18<br>Five of Six ions found between b14 and b19                                                                                                                                                                                                                                                                                                                                                                                    |
| Proline directed fragmentation pattern | 5/5          | PASS: y17-98> y16-98<br/><br>PASS: b7< b6<br/><br>PASS: y13-98> y12-98<br/><br>PASS: b11< b10<br/><br>No proline ions at y7-98<br>PASS: b17< b16<br/>                                                                                                                                                                                                                                                                                                                                                                                                                                                                                                              |
| PhosphoTyrosine transition present     | 0/0          | 0 of 0 phosphotyrosine transitions were found.                                                                                                                                                                                                                                                                                                                                                                                                                                                                                                                                                                                                                     |
| Six of top ten ions identified         | 7/6          | ion 1 (mass: 883.499: intensity: 1145.12)<br>assigned 0 times<br>ion 2 (mass: 796.290: intensity: 1121.90)<br>assigned 0 times<br>ion 3 (mass: 741.158: intensity: 910.92)<br>assigned 1 times<br>ion 4 (mass: 1656.173: intensity: 673.28)<br>assigned 1 times<br>ion 5 (mass: 828.590: intensity: 673.28)<br>assigned 1 times<br>ion 6 (mass: 925.923: intensity: 669.60)<br>assigned 2 times<br>ion 7 (mass: 1852.111: intensity: 573.51)<br>assigned 1 times<br>ion 8 (mass: 926.559: intensity: 573.51)<br>assigned 1 times<br>ion 9 (mass: 975.233: intensity: 497.10)<br>assigned 2 times<br>ion 10 (mass: 1593.719: intensity: 446.22)<br>assigned 0 times |

## Ion Table

52 ions assigned of 98 ions above threshold (53%).

### N-terminal ions

| AA | N-ion | b       | b*      | b-98 | bo      |
|----|-------|---------|---------|------|---------|
| H  | 1     | 138.066 | 121.040 | -    | 120.056 |
| G  | 2     | 195.088 | 178.061 | -    | 177.077 |

|   |    |                                                  |                                |                                |                                |
|---|----|--------------------------------------------------|--------------------------------|--------------------------------|--------------------------------|
| D | 3  | 310.115<br>309.931 (6)                           | 293.088                        | -                              | 292.104<br>292.031 (6)         |
| C | 4  | 470.145                                          | 453.119<br>453.291 (2)         | -                              | 452.135                        |
| R | 5  | 626.246<br>626.249 (5)                           | 609.220                        | -                              | 608.236                        |
| D | 6  | 741.273<br>741.158 (79)                          | 724.247                        | -                              | 723.263                        |
| P | 7  | 838.326                                          | 821.300                        | -                              | 820.316                        |
| V | 8  | 937.395                                          | 920.368                        | -                              | 919.384                        |
| Q | 9  | 1065.453<br>1065.525 (7)<br>533.248 [2+] (5)     | 1048.427                       | -                              | 1047.443                       |
| Q | 10 | 1193.512<br>*1193.393 (17)<br>597.497 [2+] (18)  | 1176.485                       | -                              | 1175.501<br>1175.460 (5)       |
| P | 11 | 1290.564                                         | 1273.538                       | -                              | 1272.554                       |
| H | 12 | 1427.623<br>*714.462 [2+] (13)<br>*1427.916 (13) | 1410.597                       | -                              | 1409.613                       |
| E | 13 | 1556.666<br>1556.513 (22)<br>*779.436 [2+] (28)  | 1539.639                       | -                              | 1538.655<br>1538.991 (13)      |
| V | 14 | 1655.734<br>1656.173 (58)<br>828.590 [2+] (58)   | 1638.708                       | -                              | 1637.724                       |
| G | 15 | 1712.756<br>1713.179 (7)                         | 1695.729                       | -                              | 1694.745                       |
| T | 16 | 1813.804<br>1814.187 (6)                         | 1796.777<br>*898.598 [2+] (24) | -                              | 1795.793<br>*898.598 [2+] (24) |
| P | 17 | 1910.856                                         | 1893.830<br>1893.460 (7)       | -                              | 1892.846                       |
| G | 18 | 1967.878<br>1967.720 (3)                         | 1950.851                       | -                              | 1949.867<br>*975.233 [2+] (43) |
| H | 19 | 2104.937<br>1053.313 [2+] (8)                    | 2087.910                       | -                              | 2086.926                       |
| s | 20 | 2271.935                                         | 2254.909                       | 2173.949                       | 2253.924                       |
| N | 21 | 2385.978<br>*1193.393 [2+] (17)                  | 2368.951                       | 2287.992                       | 2367.967                       |
| E | 22 | 2515.021                                         | 2497.994                       | 2417.035<br>1209.376 [2+] (10) | 2497.010                       |
| R | 23 | -                                                | -                              | -                              | -                              |

### C-terminal ions

| AA | C-ion | y                                               | y*                        | y-98                           | yo                            |
|----|-------|-------------------------------------------------|---------------------------|--------------------------------|-------------------------------|
| H  | 23    | -                                               | -                         | -                              | -                             |
| G  | 22    | 2552.073                                        | 2535.047                  | 2454.087                       | 2534.063                      |
| D  | 21    | 2495.052                                        | 2478.025                  | 2397.066<br>1199.295 [2+] (10) | 2477.041                      |
| C  | 20    | 2380.025<br>2380.536 (26)<br>1190.772 [2+] (26) | 2362.998                  | 2282.039<br>1141.575 [2+] (15) | 2362.014                      |
| R  | 19    | 2219.994                                        | 2202.968                  | 2122.008                       | 2201.984                      |
| D  | 18    | 2063.893                                        | 2046.867<br>*2046.665 (6) | 1965.907<br>1966.402 (6)       | 2045.883                      |
| P  | 17    | 1948.866<br>*975.233 [2+] (43)                  | 1931.840                  | 1850.880<br>*925.923 [2+] (58) | 1930.856                      |
| V  | 16    | 1851.813<br>1852.111 (50)                       | 1834.787                  | 1753.828                       | 1833.803<br>917.251 [2+] (21) |

|   |    |                                                                   |                           |                                                  |                           |
|---|----|-------------------------------------------------------------------|---------------------------|--------------------------------------------------|---------------------------|
| - | -  | *925.923 [2+] (58)<br>926.559 [2+] (50)                           | -                         | -                                                | -                         |
| Q | 15 | 1752.745                                                          | 1735.718                  | 1654.759                                         | 1734.734<br>1735.081 (2)  |
| Q | 14 | 1624.686<br>1624.537 (3)                                          | 1607.660                  | 1526.701                                         | 1606.676                  |
| P | 13 | 1496.628<br>1496.914 (11)<br>748.961 [2+] (11)                    | 1479.601                  | 1398.642<br>*1399.134 (18)<br>*700.071 [2+] (18) | 1478.617                  |
| H | 12 | 1399.575<br>*1399.134 (18)<br>*700.071 [2+] (18)<br>*1399.596 (5) | 1382.549<br>*1382.266 (5) | 1301.589                                         | 1381.565<br>*1381.537 (4) |
| E | 11 | 1262.516                                                          | 1245.490                  | 1164.530                                         | 1244.506                  |
| V | 10 | 1133.474<br>1133.292 (13)<br>*567.445 [2+] (4)                    | 1116.447                  | 1035.488<br>1035.902 (9)<br>1035.088 (10)        | 1115.463                  |
| G | 9  | 1034.405                                                          | 1017.379                  | 936.419                                          | 1016.395                  |
| T | 8  | 977.384                                                           | 960.357                   | 879.398                                          | 959.373                   |
| P | 7  | 876.336                                                           | 859.309                   | 778.350                                          | 858.325                   |
| G | 6  | 779.283<br>*779.436 (28)                                          | 762.257<br>*761.838 (22)  | 681.297                                          | 761.273<br>*761.838 (22)  |
| H | 5  | 722.262<br>361.111 [2+] (2)                                       | 705.235                   | 624.276                                          | 704.251                   |
| s | 4  | 585.203                                                           | 568.176                   | 487.217                                          | 567.192<br>*567.445 (4)   |
| N | 3  | 418.205                                                           | 401.178                   | -                                                | 400.194                   |
| E | 2  | 304.162                                                           | 287.135                   | -                                                | 286.151                   |
| R | 1  | 175.119                                                           | 158.092                   | -                                                | 157.108                   |

### Ion distribution

| Threshold | Ion count | Matches | % matched |
|-----------|-----------|---------|-----------|
| 0         | 116       | 56      | 48        |
| 0.5       | 116       | 56      | 48        |
| 1         | 112       | 56      | 50        |
| 2         | 98        | 52      | 53        |
| 3         | 84        | 49      | 58        |
| 4         | 77        | 47      | 61        |
| 5         | 72        | 45      | 62        |
| 10        | 42        | 30      | 71        |

### Observed ions > 1%

| m/z     | Intensity          | % max | Assignment (delta) |
|---------|--------------------|-------|--------------------|
| 292.031 | 70.77 <sub>,</sub> | 6.18  | b3o (-0.07)        |
| 309.931 | 77.20 <sub>,</sub> | 6.74  | b3 (-0.18)         |
| 334.928 | 13.07 <sub>,</sub> | 1.14  |                    |
| 361.111 | 23.83 <sub>,</sub> | 2.08  | y5[2+] (-0.52)     |
| 364.048 | 15.70 <sub>,</sub> | 1.37  |                    |
| 368.327 | 21.19 <sub>,</sub> | 1.85  |                    |
| 432.189 | 93.88 <sub>,</sub> | 8.19  |                    |



|          |                      |       |                                                       |
|----------|----------------------|-------|-------------------------------------------------------|
| 447.226  | 16.51 <sub>s</sub>   | 1.44  | a8*[2+] (0.53)                                        |
| 453.291  | 24.75 <sub>s</sub>   | 2.16  | b4* (0.17)                                            |
| 483.306  | 20.95 <sub>s</sub>   | 1.82  |                                                       |
| 487.104  | 21.72 <sub>s</sub>   | 1.89  | c4 (-0.06) : y4-98 (-0.11)                            |
| 504.102  | 26.96 <sub>s</sub>   | 2.35  |                                                       |
| 505.237  | 39.21 <sub>s</sub>   | 3.42  |                                                       |
| 533.248  | 61.98 <sub>s</sub>   | 5.41  | b9[2+] (0.01)                                         |
| 559.843  | 32.18 <sub>s</sub>   | 2.81  |                                                       |
| 567.445  | 49.34 <sub>s</sub>   | 4.30  | y4o (0.25) : y10[2+] (0.20)                           |
| 597.497  | 215.24 <sub>s</sub>  | 18.79 | b10[2+] (0.23)                                        |
| 603.481  | 55.78 <sub>s</sub>   | 4.87  |                                                       |
| 614.264  | 49.76 <sub>s</sub>   | 4.34  |                                                       |
| 626.249  | 62.71 <sub>s</sub>   | 5.47  | b5 (0.00)                                             |
| 644.211  | 44.46 <sub>s</sub>   | 3.88  |                                                       |
| 700.071  | 215.04 <sub>s</sub>  | 18.77 | y13-98[2+] (0.24) : y12[2+] (-0.22) : a12[2+] (-0.24) |
| 714.462  | 158.30 <sub>s</sub>  | 13.82 | x12[2+] (0.17) : b12[2+] (0.14)                       |
| 741.158  | 910.92 <sub>s</sub>  | 79.54 | b6 (-0.11)                                            |
| 748.961  | 137.15 <sub>s</sub>  | 11.97 | y13[2+] (0.14)                                        |
| 755.848  | 126.81 <sub>s</sub>  | 11.07 | a13o[2+] (0.01) : a13*[2+] (-0.47)                    |
| 761.838  | 259.56 <sub>s</sub>  | 22.66 | y6o (0.56) : y6* (-0.41) : z6 (-0.41)                 |
| 779.436  | 328.49 <sub>s</sub>  | 28.68 | b13[2+] (0.59) : y6 (0.15)                            |
| 796.290  | 1121.90 <sub>s</sub> | 97.97 |                                                       |
| 797.363  | 446.22 <sub>s</sub>  | 38.96 |                                                       |
| 828.590  | 673.28 <sub>s</sub>  | 58.79 | b14[2+] (0.21)                                        |
| 852.639  | 346.78 <sub>s</sub>  | 30.28 |                                                       |
| 853.417  | 301.04 <sub>s</sub>  | 26.28 |                                                       |
| 883.499  | 1145.12 <sub>s</sub> | 100   |                                                       |
| 885.261  | 263.87 <sub>s</sub>  | 23.04 | a16*[2+] (0.36)                                       |
| 898.598  | 280.76 <sub>s</sub>  | 24.51 | b16o[2+] (0.19) : b16*[2+] (-0.29)                    |
| 917.251  | 245.69 <sub>s</sub>  | 21.45 | y16o[2+] (-0.15)                                      |
| 925.923  | 669.60 <sub>s</sub>  | 58.47 | y17-98[2+] (-0.02) : y16[2+] (-0.48)                  |
| 926.559  | 573.51 <sub>s</sub>  | 50.08 | y16[2+] (0.14)                                        |
| 975.233  | 497.10 <sub>s</sub>  | 43.41 | y17[2+] (0.29) : b18o[2+] (-0.20)                     |
| 1000.783 | 84.86 <sub>s</sub>   | 7.41  |                                                       |
| 1035.088 | 119.53 <sub>s</sub>  | 10.43 | y10-98 (-0.40)                                        |
| 1035.902 | 104.94 <sub>s</sub>  | 9.16  | y10-98 (0.41)                                         |
| 1053.313 | 93.25 <sub>s</sub>   | 8.14  | b19[2+] (0.34)                                        |
| 1065.525 | 81.94 <sub>s</sub>   | 7.15  | b9 (0.07)                                             |
| 1078.245 | 59.26 <sub>s</sub>   | 5.17  |                                                       |
| 1133.292 | 157.00 <sub>s</sub>  | 13.71 | y10 (-0.18)                                           |
| 1141.575 | 173.70 <sub>s</sub>  | 15.16 | y20-98[2+] (0.05)                                     |
| 1142.465 | 409.29 <sub>s</sub>  | 35.74 |                                                       |
| 1150.340 | 63.96 <sub>s</sub>   | 5.58  |                                                       |

|          |                     |       |                                           |
|----------|---------------------|-------|-------------------------------------------|
| 1175.460 | 61.24 <sub>s</sub>  | 5.34  | b10o (-0.04)                              |
| 1190.772 | 306.10 <sub>s</sub> | 26.73 | y20[2+] (0.25)                            |
| 1191.815 | 70.15 <sub>s</sub>  | 6.12  |                                           |
| 1193.393 | 198.16 <sub>s</sub> | 17.30 | b21[2+] (-0.10) : b10 (-0.11)             |
| 1199.295 | 121.01 <sub>s</sub> | 10.56 | y21-98[2+] (0.25)                         |
| 1200.794 | 70.88 <sub>s</sub>  | 6.18  |                                           |
| 1209.376 | 118.67 <sub>s</sub> | 10.36 | b22-98[2+] (0.35)                         |
| 1291.699 | 25.69 <sub>s</sub>  | 2.24  |                                           |
| 1344.645 | 29.20 <sub>s</sub>  | 2.54  |                                           |
| 1346.928 | 27.04 <sub>s</sub>  | 2.36  |                                           |
| 1348.792 | 24.72 <sub>s</sub>  | 2.15  |                                           |
| 1380.564 | 27.89 <sub>s</sub>  | 2.43  |                                           |
| 1381.537 | 53.75 <sub>s</sub>  | 4.69  | y12o (-0.02) : a12o (-0.08)               |
| 1382.266 | 59.95 <sub>s</sub>  | 5.23  | y12* (-0.28) : z12 (-0.28) : a12* (-0.33) |
| 1399.134 | 215.04 <sub>s</sub> | 18.77 | y13-98 (0.49) : y12 (-0.44) : a12 (-0.49) |
| 1399.596 | 58.15 <sub>s</sub>  | 5.07  | y12 (0.02) : a12 (-0.03)                  |
| 1400.797 | 46.42 <sub>s</sub>  | 4.05  |                                           |
| 1427.916 | 158.30 <sub>s</sub> | 13.82 | x12 (0.34) : b12 (0.29)                   |
| 1445.815 | 74.67 <sub>s</sub>  | 6.52  |                                           |
| 1496.914 | 137.15 <sub>s</sub> | 11.97 | y13 (0.28)                                |
| 1538.991 | 159.46 <sub>s</sub> | 13.92 | b13o (0.33)                               |
| 1544.057 | 33.60 <sub>s</sub>  | 2.93  |                                           |
| 1556.513 | 258.58 <sub>s</sub> | 22.58 | b13 (-0.15)                               |
| 1571.800 | 41.56 <sub>s</sub>  | 3.62  |                                           |
| 1586.340 | 85.19 <sub>s</sub>  | 7.43  |                                           |
| 1593.719 | 446.22 <sub>s</sub> | 38.96 |                                           |
| 1624.537 | 44.27 <sub>s</sub>  | 3.86  | y14 (-0.14)                               |
| 1636.876 | 72.62 <sub>s</sub>  | 6.34  |                                           |
| 1656.173 | 673.28 <sub>s</sub> | 58.79 | b14 (0.43)                                |
| 1665.568 | 44.36 <sub>s</sub>  | 3.87  |                                           |
| 1671.867 | 91.98 <sub>s</sub>  | 8.03  |                                           |
| 1705.826 | 301.04 <sub>s</sub> | 26.28 |                                           |
| 1713.179 | 87.36 <sub>s</sub>  | 7.62  | b15 (0.42)                                |
| 1735.081 | 24.94 <sub>s</sub>  | 2.17  | y15o (0.34)                               |
| 1751.505 | 91.11 <sub>s</sub>  | 7.95  |                                           |
| 1761.178 | 146.92 <sub>s</sub> | 12.83 |                                           |
| 1769.515 | 263.87 <sub>s</sub> | 23.04 |                                           |
| 1814.187 | 69.70 <sub>s</sub>  | 6.08  | b16 (0.38)                                |
| 1835.532 | 123.87 <sub>s</sub> | 10.81 |                                           |
| 1852.111 | 573.51 <sub>s</sub> | 50.08 | y16 (0.29)                                |
| 1853.996 | 65.14 <sub>s</sub>  | 5.68  |                                           |
| 1868.529 | 236.72 <sub>s</sub> | 20.67 |                                           |
| 1893.460 | 80.98 <sub>s</sub>  | 7.07  | b17* (-0.37)                              |

|          |                     |       |                            |
|----------|---------------------|-------|----------------------------|
| 1909.335 | 31.08 <sub>,</sub>  | 2.71  |                            |
| 1916.888 | 18.45 <sub>,</sub>  | 1.61  |                            |
| 1930.229 | 40.43 <sub>,</sub>  | 3.53  |                            |
| 1933.983 | 70.92 <sub>,</sub>  | 6.19  |                            |
| 1966.402 | 70.53 <sub>,</sub>  | 6.15  | y18-98 (0.49)              |
| 1967.720 | 45.17 <sub>,</sub>  | 3.94  | b18 (-0.15)                |
| 2033.727 | 13.47 <sub>,</sub>  | 1.17  |                            |
| 2037.118 | 13.97 <sub>,</sub>  | 1.21  |                            |
| 2046.665 | 71.15 <sub>,</sub>  | 6.21  | z18 (-0.20) : y18* (-0.20) |
| 2086.848 | 20.62 <sub>,</sub>  | 1.80  | b19o (-0.07)               |
| 2090.610 | 20.46 <sub>,</sub>  | 1.78  |                            |
| 2122.490 | 12.52 <sub>,</sub>  | 1.09  | c19 (0.52) : y19-98 (0.48) |
| 2130.042 | 81.94 <sub>,</sub>  | 7.15  |                            |
| 2157.090 | 14.28 <sub>,</sub>  | 1.24  |                            |
| 2197.975 | 24.08 <sub>,</sub>  | 2.10  |                            |
| 2258.034 | 22.36 <sub>,</sub>  | 1.95  |                            |
| 2325.719 | 28.91 <sub>,</sub>  | 2.52  |                            |
| 2364.101 | 62.43 <sub>,</sub>  | 5.45  |                            |
| 2380.536 | 306.10 <sub>,</sub> | 26.73 | y20 (0.51)                 |

**S767**

# ProPhosSI MS/MS report

Mass: 636.647216796875 Charge: 3+

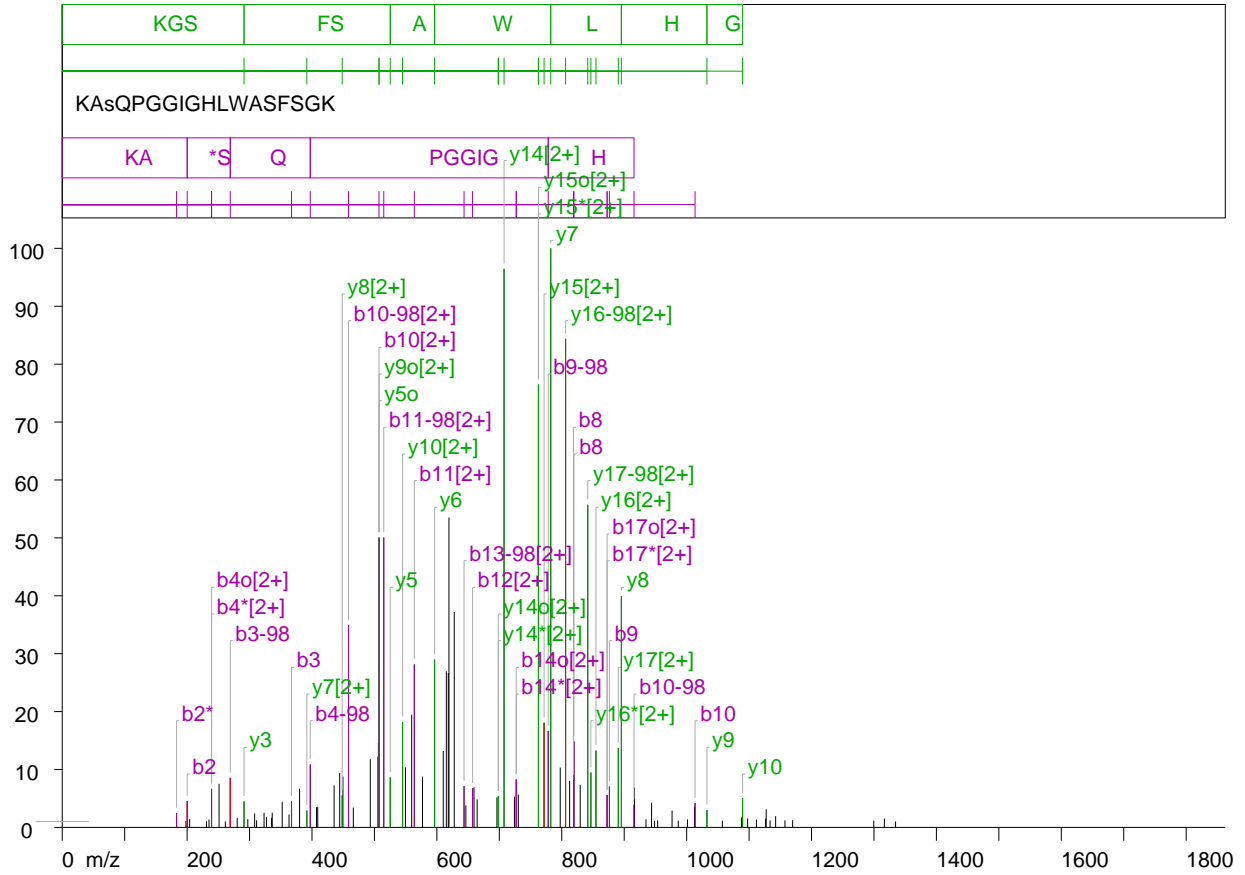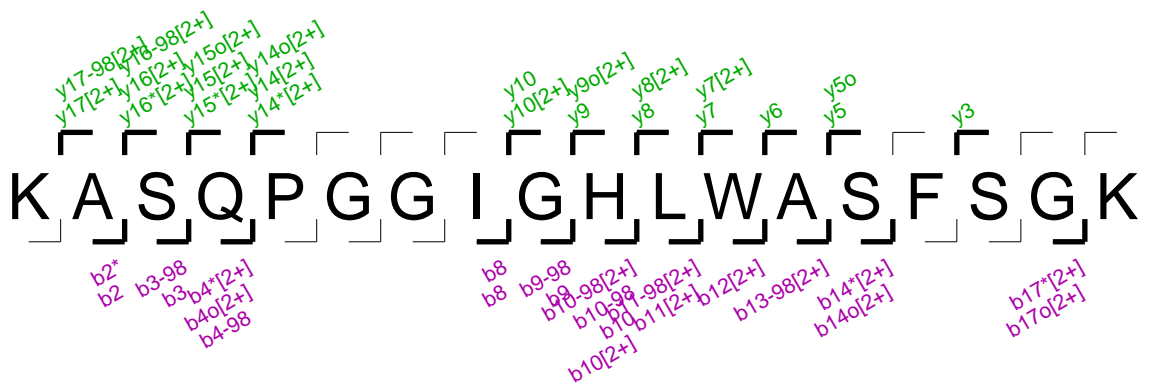

## Cav3.2 Rat

(40) 765 KAsQPGGIGHLWASFS GK 782 1906.909 (0.0090) Da

|                         |     |
|-------------------------|-----|
| Parent Ion              | m/z |
| No parent ions observed |     |

### Modifications and supporting evidence

| Position | Residue ID | Modification | Evidence                            |
|----------|------------|--------------|-------------------------------------|
| 3        | (767)      | Phospho (ST) | b2 => b3-98 : y15[2+] => y16-98[2+] |

### Spectrum interpretation

| Rule                                   | passed/tests | Description                                                                                                                                                                                                                                                                                                                                                                                                                                                                                                                                                                                                                                                                                                                                                     |
|----------------------------------------|--------------|-----------------------------------------------------------------------------------------------------------------------------------------------------------------------------------------------------------------------------------------------------------------------------------------------------------------------------------------------------------------------------------------------------------------------------------------------------------------------------------------------------------------------------------------------------------------------------------------------------------------------------------------------------------------------------------------------------------------------------------------------------------------|
| Parent ions present                    | 0/1          | Parent ions corresponding to the parent fragment - 1 phosphate ions were not found                                                                                                                                                                                                                                                                                                                                                                                                                                                                                                                                                                                                                                                                              |
| Three -98 Ions present                 | 1/1          | 8 des-phospho fragment ions were found.                                                                                                                                                                                                                                                                                                                                                                                                                                                                                                                                                                                                                                                                                                                         |
| Unique -98 transitions present         | 1/1          | transition b2 to b3-98, transition y15 to y16-98 support unique phosphorylation at position 3<br><br/>                                                                                                                                                                                                                                                                                                                                                                                                                                                                                                                                                                                                                                                          |
| Four Sequential b or y ions            | 1/1          | Sequence of four y ions found from y5 to y8.                                                                                                                                                                                                                                                                                                                                                                                                                                                                                                                                                                                                                                                                                                                    |
| Five of six sequential ions present    | 1/1          | Five of Six ions found between y3 and y8<br>Five of Six ions found between y4 and y9<br>Five of Six ions found between y5 and y10<br>Five of Six ions found between y6 and y11                                                                                                                                                                                                                                                                                                                                                                                                                                                                                                                                                                                  |
| Proline directed fragmentation pattern | 2/2          | PASS: y14> y13<br/><br>PASS: b5-98< b4-98<br/>                                                                                                                                                                                                                                                                                                                                                                                                                                                                                                                                                                                                                                                                                                                  |
| PhosphoTyrosine transition present     | 0/0          | 0 of 0 phosphotyrosine transitions were found.                                                                                                                                                                                                                                                                                                                                                                                                                                                                                                                                                                                                                                                                                                                  |
| Six of top ten ions identified         | 8/6          | ion 1 (mass: 782.3322754: intensity: 4223.9799804688) assigned 1 times<br>ion 2 (mass: 707.5706787: intensity: 4075.1848144531) assigned 1 times<br>ion 3 (mass: 806.1505127: intensity: 3563.6220703125) assigned 1 times<br>ion 4 (mass: 762.6607666: intensity: 3230.283203125) assigned 3 times<br>ion 5 (mass: 841.6268311: intensity: 2353.9458007813) assigned 1 times<br>ion 6 (mass: 619.3394775: intensity: 2260.4096679688) assigned 0 times<br>ion 7 (mass: 514.9327393: intensity: 2114.8166503906) assigned 1 times<br>ion 8 (mass: 507.3489075: intensity: 2113.9306640625) assigned 3 times<br>ion 9 (mass: 895.4542236: intensity: 1685.9973144531) assigned 1 times<br>ion 10 (mass: 627.8198242: intensity: 1571.224609375) assigned 0 times |

### Ion Table

45 ions assigned of 77 ions above threshold (58%).

#### N-terminal ions

| AA | N-ion | b                          | b*                               | b-98                        | bo                               |
|----|-------|----------------------------|----------------------------------|-----------------------------|----------------------------------|
| K  | 1     | 129.102                    | 112.076                          | -                           | 111.092                          |
| A  | 2     | 200.139<br>200.1352081 (4) | 183.113<br>183.1346741 (2)       | -                           | 182.129                          |
| s  | 3     | 367.138<br>367.2416992 (4) | 350.111                          | 269.152<br>269.1040649 (8)  | 349.127                          |
| Q  | 4     | 495.196                    | 478.170<br>*239.1551514 [2+] (6) | 397.210<br>397.2113647 (10) | 477.186<br>*239.1551514 [2+] (6) |

|   |    |                                                      |                                   |                                                    |                                   |
|---|----|------------------------------------------------------|-----------------------------------|----------------------------------------------------|-----------------------------------|
| P | 5  | 592.249                                              | 575.223                           | 494.263                                            | 574.239                           |
| G | 6  | 649.271                                              | 632.244                           | 551.285                                            | 631.260                           |
| G | 7  | 706.292                                              | 689.265                           | 608.306                                            | 688.281                           |
| I | 8  | 819.376<br>818.788208 (8)<br>819.6325684 (14)        | 802.350                           | 721.390                                            | 801.366                           |
| G | 9  | 876.398<br>876.2927246 (7)                           | 859.371                           | 778.412<br>778.342041 (16)                         | 858.387                           |
| H | 10 | 1013.456<br>1013.46582 (4)<br>*507.3489075 [2+] (50) | 996.430                           | 915.471<br>458.517334 [2+] (34)<br>915.7303467 (3) | 995.446                           |
| L | 11 | 1126.541<br>*563.8987427 [2+] (28)                   | 1109.514                          | 1028.555<br>514.9327393 [2+] (50)                  | 1108.530                          |
| W | 12 | 1312.620<br>657.1738281 [2+] (6)                     | 1295.593                          | 1214.634                                           | 1294.609                          |
| A | 13 | 1383.657                                             | 1366.630                          | 1285.671<br>643.5109863 [2+] (7)                   | 1365.646                          |
| S | 14 | 1470.689                                             | 1453.662<br>*727.1247559 [2+] (8) | 1372.703                                           | 1452.678<br>*727.1247559 [2+] (8) |
| F | 15 | 1617.757                                             | 1600.731                          | 1519.772                                           | 1599.747                          |
| S | 16 | 1704.789                                             | 1687.763                          | 1606.804                                           | 1686.779                          |
| G | 17 | 1761.811                                             | 1744.784<br>*872.6531982 [2+] (5) | 1663.825                                           | 1743.800<br>*872.6531982 [2+] (5) |
| K | 18 | -                                                    | -                                 | -                                                  | -                                 |

### C-terminal ions

| AA | C-ion | y                                                    | y*                                 | y-98                              | yo                                 |
|----|-------|------------------------------------------------------|------------------------------------|-----------------------------------|------------------------------------|
| K  | 18    | -                                                    | -                                  | -                                 | -                                  |
| A  | 17    | 1779.822<br>890.560791 [2+] (13)                     | 1762.795                           | 1681.836<br>841.6268311 [2+] (55) | 1761.811                           |
| s  | 16    | 1708.784<br>854.7893066 [2+] (13)                    | 1691.758<br>*846.645874 [2+] (9)   | 1610.798<br>806.1505127 [2+] (84) | 1690.774                           |
| Q  | 15    | 1541.786<br>771.7022705 [2+] (18)                    | 1524.760<br>*762.6607666 [2+] (76) | -                                 | 1523.775<br>*762.6607666 [2+] (76) |
| P  | 14    | 1413.727<br>707.5706787 [2+] (96)                    | 1396.701<br>*698.3913574 [2+] (5)  | -                                 | 1395.717<br>*698.3913574 [2+] (5)  |
| G  | 13    | 1316.675                                             | 1299.648                           | -                                 | 1298.664                           |
| G  | 12    | 1259.653                                             | 1242.627                           | -                                 | 1241.643                           |
| I  | 11    | 1202.632                                             | 1185.605                           | -                                 | 1184.621                           |
| G  | 10    | 1089.548<br>545.0587158 [2+] (18)<br>1089.573975 (5) | 1072.521                           | -                                 | 1071.537                           |
| H  | 9     | 1032.526<br>1032.484497 (3)                          | 1015.500                           | -                                 | 1014.516<br>*507.3489075 [2+] (50) |
| L  | 8     | 895.467<br>895.4542236 (39)<br>448.3309937 [2+] (5)  | 878.441                            | -                                 | 877.457                            |
| W  | 7     | 782.383<br>782.3322754 (100)<br>391.734314 [2+] (2)  | 765.357                            | -                                 | 764.373                            |
| A  | 6     | 596.304<br>596.3730469 (28)                          | 579.277                            | -                                 | 578.293                            |
| S  | 5     | 525.267<br>525.3062744 (8)                           | 508.240                            | -                                 | 507.256<br>*507.3489075 (50)       |
| F  | 4     | 438.235                                              | 421.208                            | -                                 | 420.224                            |
| S  | 3     | 291.166<br>291.1594238 (4)                           | 274.140                            | -                                 | 273.156                            |

|   |   |         |         |   |         |
|---|---|---------|---------|---|---------|
| G | 2 | 204.134 | 187.108 | - | 186.124 |
| K | 1 | 147.113 | 130.086 | - | 129.102 |

### Ion distribution

| Threshold | Ion count | Matches | % matched |
|-----------|-----------|---------|-----------|
| 0         | 134       | 58      | 43        |
| 0.5       | 123       | 56      | 45        |
| 1         | 104       | 51      | 49        |
| 2         | 77        | 45      | 58        |
| 3         | 70        | 43      | 61        |
| 4         | 62        | 40      | 64        |
| 5         | 55        | 36      | 65        |
| 10        | 29        | 21      | 72        |

### Observed ions > 1%

| m/z         | Intensity                   | % max | Assignment (delta)               |
|-------------|-----------------------------|-------|----------------------------------|
| 183.1346741 | 104.6109008789 <sub>1</sub> | 2.47  | b2* (0.02)                       |
| 198.0514526 | 47.384185791 <sub>1</sub>   | 1.12  |                                  |
| 200.1352081 | 191.2577209473 <sub>1</sub> | 4.52  | b2 (-0.00)                       |
| 204.1161957 | 60.3963050842 <sub>1</sub>  | 1.42  | y2 (-0.01)                       |
| 231.036438  | 44.747756958 <sub>1</sub>   | 1.05  |                                  |
| 235.09198   | 57.9577713013 <sub>1</sub>  | 1.37  |                                  |
| 239.1551514 | 281.0525817871 <sub>1</sub> | 6.65  | b4o[2+] (0.05) : b4*[2+] (-0.43) |
| 251.1574554 | 318.4244995117 <sub>1</sub> | 7.53  |                                  |
| 261.2457275 | 43.6239242554 <sub>1</sub>  | 1.03  |                                  |
| 269.1040649 | 361.3433227539 <sub>1</sub> | 8.55  | b3-98 (-0.04)                    |
| 280.223938  | 69.7907791138 <sub>1</sub>  | 1.65  |                                  |
| 291.1594238 | 189.9580993652 <sub>1</sub> | 4.49  | y3 (-0.00)                       |
| 297.1973267 | 60.147518158 <sub>1</sub>   | 1.42  | b5[2+] (0.56)                    |
| 308.1654663 | 101.3315582275 <sub>1</sub> | 2.39  |                                  |
| 311.256897  | 52.1039352417 <sub>1</sub>  | 1.23  | a6[2+] (0.11)                    |
| 323.2233276 | 106.1564483643 <sub>1</sub> | 2.51  |                                  |
| 327.1565857 | 74.3915557861 <sub>1</sub>  | 1.76  |                                  |
| 335.1796875 | 71.1344833374 <sub>1</sub>  | 1.68  |                                  |
| 336.2815552 | 108.3147125244 <sub>1</sub> | 2.56  |                                  |
| 352.2822876 | 187.1207122803 <sub>1</sub> | 4.42  |                                  |
| 363.2129822 | 93.8795623779 <sub>1</sub>  | 2.22  |                                  |
| 367.2416992 | 189.326171875 <sub>1</sub>  | 4.48  | b3 (0.10)                        |
| 380.0979614 | 281.3803405762 <sub>1</sub> | 6.66  |                                  |
| 391.734314  | 123.5500106812 <sub>1</sub> | 2.92  | y7[2+] (0.03)                    |
| 397.2113647 | 459.9897460938 <sub>1</sub> | 10.88 | b4-98 (0.00)                     |
| 407.2460938 | 147.2420043945 <sub>1</sub> | 3.48  |                                  |



|             |                  |       |                                                      |
|-------------|------------------|-------|------------------------------------------------------|
| 409.2000732 | 150.8486022949,  | 3.57  |                                                      |
| 435.3997192 | 305.9363098145,  | 7.24  |                                                      |
| 444.3591614 | 396.196685791,   | 9.37  |                                                      |
| 448.3309937 | 233.272567749,   | 5.52  | y8[2+] (0.09)                                        |
| 449.5515442 | 370.9985961914,  | 8.78  | a4o (0.36)                                           |
| 458.517334  | 1476.7277832031, | 34.96 | b10-98[2+] (0.27)                                    |
| 466.1941223 | 144.112487793,   | 3.41  | x4 (-0.03)                                           |
| 493.3479919 | 496.7499389648,  | 11.76 | a10[2+] (0.11)                                       |
| 505.6428528 | 516.5830078125,  | 12.22 |                                                      |
| 506.3612366 | 614.9125366211,  | 14.55 |                                                      |
| 507.3489075 | 2113.9306640625, | 50.04 | b10[2+] (0.11) : y5o (0.09) : y9o[2+] (-0.41)        |
| 514.9327393 | 2114.8166503906, | 50.06 | b11-98[2+] (0.15)                                    |
| 525.3062744 | 364.7780456543,  | 8.63  | y5 (0.03)                                            |
| 545.0587158 | 768.9884033203,  | 18.20 | y10[2+] (-0.21)                                      |
| 549.6138916 | 438.4366455078,  | 10.37 | a11[2+] (-0.16)                                      |
| 559.675293  | 821.6794433594,  | 19.45 | x10[2+] (0.39)                                       |
| 563.8987427 | 1188.9721679688, | 28.14 | b11[2+] (0.12) : a5 (-0.35)                          |
| 576.9904175 | 370.9055480957,  | 8.78  |                                                      |
| 596.3730469 | 1224.1041259766, | 28.97 | y6 (0.06)                                            |
| 610.2254639 | 556.7518310547,  | 13.18 |                                                      |
| 615.1580811 | 1138.5537109375, | 26.95 |                                                      |
| 618.2860107 | 1126.2561035156, | 26.66 |                                                      |
| 619.3394775 | 2260.4096679688, | 53.51 |                                                      |
| 627.8198242 | 1571.224609375,  | 37.19 |                                                      |
| 643.5109863 | 301.7297363281,  | 7.14  | b13-98[2+] (0.17)                                    |
| 646.3984985 | 160.0970153809,  | 3.79  |                                                      |
| 657.1738281 | 285.3500976563,  | 6.75  | b12[2+] (0.35)                                       |
| 659.4732666 | 291.8381347656,  | 6.90  |                                                      |
| 664.5183716 | 203.9619140625,  | 4.82  |                                                      |
| 696.1784668 | 218.3371887207,  | 5.16  |                                                      |
| 698.3913574 | 226.4786376953,  | 5.36  | y14o[2+] (0.02) : y14*[2+] (-0.46) : z14[2+] (-0.46) |
| 707.5706787 | 4075.1848144531, | 96.47 | y14[2+] (0.20)                                       |
| 724.1916504 | 223.8597412109,  | 5.29  |                                                      |
| 727.1247559 | 349.6002197266,  | 8.27  | b14o[2+] (0.28) : b14*[2+] (-0.21)                   |
| 730.3955078 | 238.9128112793,  | 5.65  |                                                      |
| 762.6607666 | 3230.283203125,  | 76.47 | y15o[2+] (0.26) : y15*[2+] (-0.22) : z15[2+] (-0.22) |
| 771.7022705 | 763.6762695313,  | 18.07 | y15[2+] (0.30)                                       |
| 778.342041  | 703.5729370117,  | 16.65 | b9-98 (-0.07)                                        |
| 782.3322754 | 4223.9799804688, | 100   | y7 (-0.05)                                           |
| 797.5270996 | 436.4644775391,  | 10.33 |                                                      |
| 806.1505127 | 3563.6220703125, | 84.36 | y16-98[2+] (0.24)                                    |
| 812.6011963 | 339.2046508789,  | 8.03  |                                                      |
| 818.788208  | 343.0336608887,  | 8.12  | b8 (-0.58)                                           |

|             |                  |       |                                    |
|-------------|------------------|-------|------------------------------------|
| 819.6325684 | 627.2327880859,  | 14.84 | b8 (0.25)                          |
| 829.5476074 | 310.2118835449,  | 7.34  | a16o[2+] (-0.34)                   |
| 841.6268311 | 2353.9458007813, | 55.72 | y17-98[2+] (0.20)                  |
| 846.645874  | 400.5522460938,  | 9.48  | y16*[2+] (0.26) : z16[2+] (0.26)   |
| 854.7893066 | 561.4207763672,  | 13.29 | y16[2+] (-0.10)                    |
| 872.6531982 | 235.3727111816,  | 5.57  | b17o[2+] (0.24) : b17*[2+] (-0.24) |
| 876.2927246 | 298.0696105957,  | 7.05  | b9 (-0.10)                         |
| 890.560791  | 578.6624145508,  | 13.69 | y17[2+] (0.14)                     |
| 895.4542236 | 1685.9973144531, | 39.91 | y8 (-0.01)                         |
| 915.7303467 | 165.5553283691,  | 3.91  | b10-98 (0.25)                      |
| 916.5400391 | 290.4176025391,  | 6.87  |                                    |
| 934.8740234 | 58.8388137817,   | 1.39  |                                    |
| 943.8443604 | 180.1066436768,  | 4.26  |                                    |
| 948.6276855 | 47.7251548767,   | 1.12  |                                    |
| 953.6016846 | 51.4265060425,   | 1.21  |                                    |
| 976.6446533 | 122.2106170654,  | 2.89  |                                    |
| 986.5495605 | 49.5744552612,   | 1.17  |                                    |
| 1001.351563 | 57.6520195007,   | 1.36  |                                    |
| 1012.552246 | 149.9859466553,  | 3.55  |                                    |
| 1013.46582  | 176.8447418213,  | 4.18  | b10 (0.00)                         |
| 1032.484497 | 127.277923584,   | 3.01  | y9 (-0.04)                         |
| 1057.213989 | 49.1872177124,   | 1.16  |                                    |
| 1087.725464 | 72.5927810669,   | 1.71  |                                    |
| 1089.573975 | 213.2252502441,  | 5.04  | y10 (0.02)                         |
| 1097.673096 | 65.2645492554,   | 1.54  |                                    |
| 1111.816162 | 57.068611145,    | 1.35  |                                    |
| 1126.44812  | 64.2663421631,   | 1.52  | b11 (-0.09)                        |
| 1127.414551 | 131.6219940186,  | 3.11  |                                    |
| 1133.626465 | 50.8266143799,   | 1.20  |                                    |
| 1142.512939 | 81.8007888794,   | 1.93  |                                    |
| 1157.439209 | 51.3856468201,   | 1.21  |                                    |
| 1169.788574 | 52.8947601318,   | 1.25  |                                    |
| 1299.717041 | 49.6362571716,   | 1.17  | y13* (0.06) : z13 (0.06)           |
| 1316.660522 | 64.8597335815,   | 1.53  | y13 (-0.01)                        |
| 1334.584595 | 43.2761688232,   | 1.02  |                                    |

T1031 or

S1032 or

T1033

# ProPhosSI MS/MS report

Mass: 794.013549804688 Charge: 3+

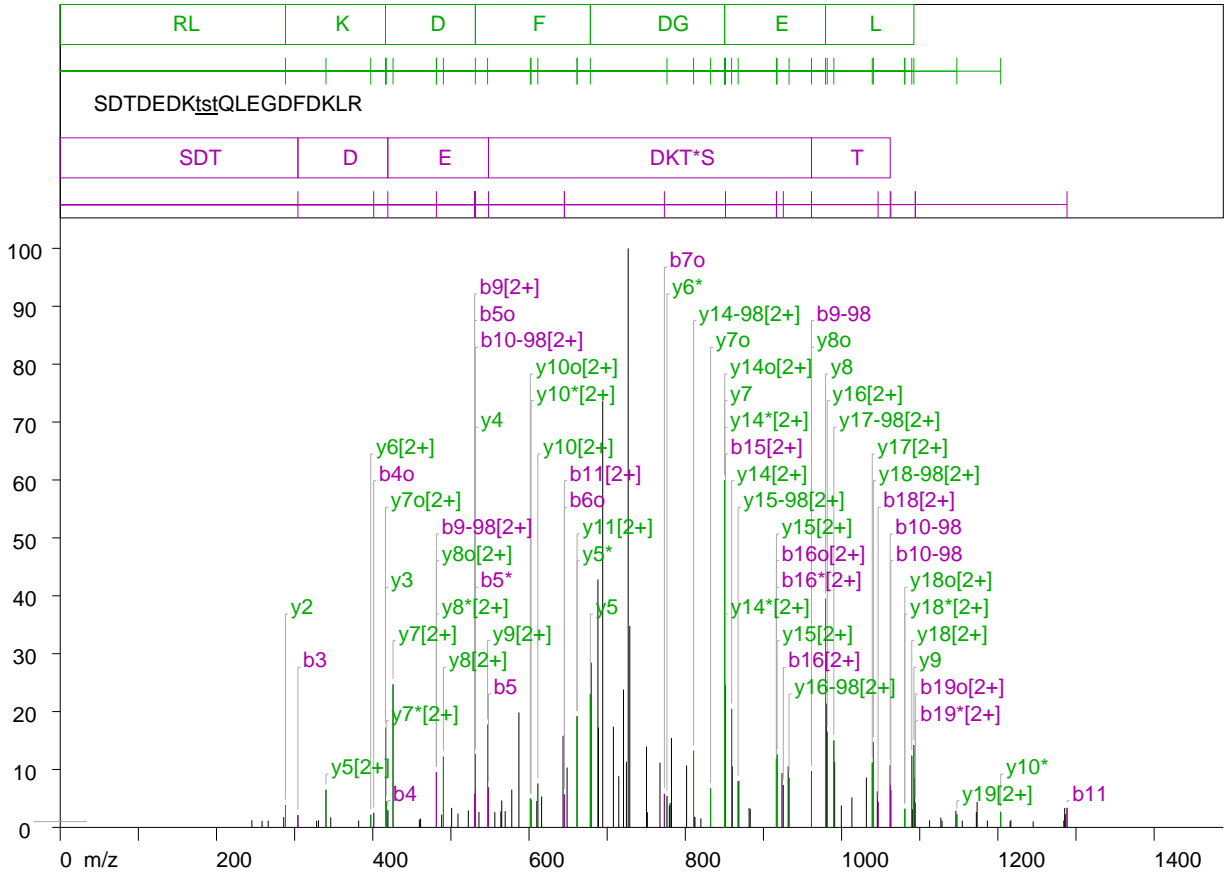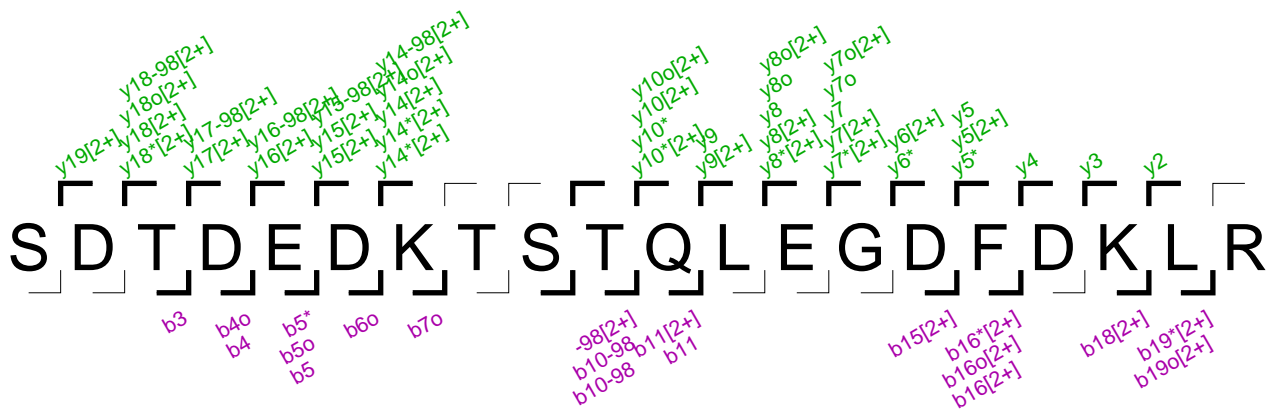

## Cav3.2 Rat

(65) 1024 SDTDEDKstQLEGDFDKLR 1043 2379.011 (0.0055) Da

|                         |     |
|-------------------------|-----|
| Parent Ion              | m/z |
| No parent ions observed |     |

### Modifications and supporting evidence

| Position     | Residue ID             | Modification | Evidence            |
|--------------|------------------------|--------------|---------------------|
| 8 or 9 or 10 | (1031 or 1032 or 1033) | Phospho (ST) | y10[2+]=>y14-98[2+] |

### Spectrum interpretation

| Rule                                   | passed/tests | Description                                                                                                                                                                                                                                                                                                                                                                                                                                                                                                                                                                                                                                                                                                                                                |
|----------------------------------------|--------------|------------------------------------------------------------------------------------------------------------------------------------------------------------------------------------------------------------------------------------------------------------------------------------------------------------------------------------------------------------------------------------------------------------------------------------------------------------------------------------------------------------------------------------------------------------------------------------------------------------------------------------------------------------------------------------------------------------------------------------------------------------|
| Parent ions present                    | 0/1          | Parent ions corresponding to the parent fragment - 1 phosphate ions were not found                                                                                                                                                                                                                                                                                                                                                                                                                                                                                                                                                                                                                                                                         |
| Three -98 Ions present                 | 1/1          | 7 des-phospho fragment ions were found.                                                                                                                                                                                                                                                                                                                                                                                                                                                                                                                                                                                                                                                                                                                    |
| Unique -98 transitions present         | 0/1          | Transition y10[2+] to y14-98[2+] suggests phosphorylation at position 1031, 1032 or 1033                                                                                                                                                                                                                                                                                                                                                                                                                                                                                                                                                                                                                                                                   |
| Four Sequential b or y ions            | 1/1          | Sequence of four y ions found from y2 to y5.                                                                                                                                                                                                                                                                                                                                                                                                                                                                                                                                                                                                                                                                                                               |
| Five of six sequential ions present    | 1/1          | Five of Six ions found between y1 and y6<br>Five of Six ions found between y2 and y7<br>Five of Six ions found between y3 and y8<br>Five of Six ions found between y4 and y9<br>Five of Six ions found between y5 and y10<br>Five of Six ions found between y6 and y11<br>Five of Six ions found between y7 and y12<br>Five of Six ions found between y13 and y18<br>Five of Six ions found between y14 and y19                                                                                                                                                                                                                                                                                                                                            |
| Proline directed fragmentation pattern | 0/0          |                                                                                                                                                                                                                                                                                                                                                                                                                                                                                                                                                                                                                                                                                                                                                            |
| PhosphoTyrosine transition present     | 0/0          | 0 of 0 phosphotyrosine transitions were found.                                                                                                                                                                                                                                                                                                                                                                                                                                                                                                                                                                                                                                                                                                             |
| Six of top ten ions identified         | 4/6          | ion 1 (mass: 726.9064941: intensity: 55601.171875) assigned 0 times<br>ion 2 (mass: 694.2990723: intensity: 40933.7578125) assigned 0 times<br>ion 3 (mass: 850.3981934: intensity: 33304.3359375) assigned 4 times<br>ion 4 (mass: 688.1502686: intensity: 23805.568359375) assigned 0 times<br>ion 5 (mass: 979.4541016: intensity: 21972.0859375) assigned 1 times<br>ion 6 (mass: 728.9086914: intensity: 19338.162109375) assigned 0 times<br>ion 7 (mass: 679.5153809: intensity: 15809.1455078125) assigned 0 times<br>ion 8 (mass: 425.9342041: intensity: 13735.0087890625) assigned 1 times<br>ion 9 (mass: 851.4431152: intensity: 13633.482421875) assigned 3 times<br>ion 10 (mass: 720.8850098: intensity: 13234.498046875) assigned 0 times |

### Ion Table

56 ions assigned of 100 ions above threshold (56%).

#### N-terminal ions

| AA | N-ion | b       | b*      | b-98 | bo      |
|----|-------|---------|---------|------|---------|
| S  | 1     | 88.039  | 71.013  | -    | 70.029  |
| D  | 2     | 203.066 | 186.040 | -    | 185.056 |
| T  | 3     | 304.114 | 287.087 | -    | 286.103 |

|   |    |                                                      |                                    |                                                                          |                                    |
|---|----|------------------------------------------------------|------------------------------------|--------------------------------------------------------------------------|------------------------------------|
| - | -  | 304.2335815 (2)                                      | -                                  | -                                                                        | -                                  |
| D | 4  | 419.141<br>419.2612 (2)                              | 402.114                            | -                                                                        | 401.130<br>401.1953125 (2)         |
| E | 5  | 548.184<br>548.0411987 (6)                           | 531.157<br>*531.2991943 (12)       | -                                                                        | 530.173<br>*530.2893066 (5)        |
| D | 6  | 663.210                                              | 646.184                            | -                                                                        | 645.200<br>*645.2532959 (5)        |
| K | 7  | 791.305                                              | 774.279                            | -                                                                        | 773.295<br>773.2181396 (5)         |
| T | 8  | 892.353                                              | 875.327                            | -                                                                        | 874.343                            |
| s | 9  | 1059.351<br>*530.2893066 [2+] (5)                    | 1042.325                           | 961.366<br>*961.4696045 (9)<br>*481.4695129 [2+] (9)                     | 1041.341                           |
| T | 10 | 1160.399                                             | 1143.373                           | 1062.413<br>*531.2991943 [2+] (12)<br>1062.23999 (10)<br>1063.000854 (6) | 1142.389                           |
| Q | 11 | 1288.458<br>*645.2532959 [2+] (5)<br>1288.540771 (3) | 1271.431                           | 1190.472                                                                 | 1270.447                           |
| L | 12 | 1401.542                                             | 1384.515                           | 1303.556                                                                 | 1383.531                           |
| E | 13 | 1530.584                                             | 1513.558                           | 1432.598                                                                 | 1512.574                           |
| G | 14 | 1587.606                                             | 1570.579                           | 1489.620                                                                 | 1569.595                           |
| D | 15 | 1702.633<br>*851.4431152 [2+] (24)                   | 1685.606                           | 1604.647                                                                 | 1684.622                           |
| F | 16 | 1849.701<br>925.4393311 [2+] (7)                     | 1832.675<br>*916.6154785 [2+] (11) | 1751.715                                                                 | 1831.691<br>*916.6154785 [2+] (11) |
| D | 17 | 1964.728                                             | 1947.702                           | 1866.742                                                                 | 1946.718                           |
| K | 18 | 2092.823<br>1046.719604 [2+] (4)                     | 2075.797                           | 1994.837                                                                 | 2074.813                           |
| L | 19 | 2205.907                                             | 2188.881<br>*1094.380005 [2+] (4)  | 2107.921                                                                 | 2187.897<br>*1094.380005 [2+] (4)  |
| R | 20 | -                                                    | -                                  | -                                                                        | -                                  |

### C-terminal ions

| AA | C-ion | y                                                           | y*                                                           | y-98                              | yo                                 |
|----|-------|-------------------------------------------------------------|--------------------------------------------------------------|-----------------------------------|------------------------------------|
| S  | 20    | -                                                           | -                                                            | -                                 | -                                  |
| D  | 19    | 2292.987<br>1147.503906 [2+] (2)                            | 2275.960                                                     | 2195.001                          | 2274.976                           |
| T  | 18    | 2177.960<br>*1089.823364 [2+] (12)                          | 2160.933<br>*1080.865234 [2+] (3)                            | 2079.974<br>1040.697144 [2+] (14) | 2159.949<br>*1080.865234 [2+] (3)  |
| D  | 17    | 2076.912<br>1039.268799 [2+] (11)                           | 2059.886                                                     | 1978.926<br>990.0927734 [2+] (15) | 2058.902                           |
| E  | 16    | 1961.885<br>981.654541 [2+] (16)                            | 1944.859                                                     | 1863.899<br>932.7960205 [2+] (8)  | 1943.875                           |
| D  | 15    | 1832.843<br>*916.6154785 [2+] (11)<br>917.4641113 [2+] (12) | 1815.816                                                     | 1734.857<br>867.6484375 [2+] (7)  | 1814.832                           |
| K  | 14    | 1717.816<br>859.2803955 [2+] (20)                           | 1700.789<br>*851.4431152 [2+] (24)<br>*850.3981934 [2+] (59) | 1619.830<br>810.5582275 [2+] (13) | 1699.805<br>*850.3981934 [2+] (59) |
| T  | 13    | 1589.721                                                    | 1572.694                                                     | 1491.735                          | 1571.710                           |
| s  | 12    | 1488.673                                                    | 1471.647                                                     | 1390.687                          | 1470.663                           |
| T  | 11    | 1321.675<br>*661.4934082 [2+] (19)                          | 1304.648                                                     | -                                 | 1303.664                           |
| Q  | 10    | 1220.627<br>611.1989746 [2+] (7)                            | 1203.601<br>*602.5950928 [2+] (4)<br>*1203.620117 (2)        | -                                 | 1202.617<br>601.6763916 [2+] (5)   |

|   |   |                                                       |                                  |   |                                                      |
|---|---|-------------------------------------------------------|----------------------------------|---|------------------------------------------------------|
| L | 9 | 1092.569<br>546.9180908 [2+] (17)<br>1092.535034 (14) | 1075.542                         | - | 1074.558                                             |
| E | 8 | 979.484<br>490.3918152 [2+] (12)<br>979.4541016 (39)  | 962.458<br>*481.4695129 [2+] (9) | - | 961.474<br>*961.4696045 (9)<br>*481.4695129 [2+] (9) |
| G | 7 | 850.442<br>425.9342041 [2+] (24)<br>*850.3981934 (59) | 833.415<br>*417.3232117 [2+] (4) | - | 832.431<br>832.4106445 (6)<br>*416.3016052 [2+] (17) |
| D | 6 | 793.420<br>397.4235535 [2+] (2)                       | 776.394<br>*776.5163574 (5)      | - | 775.410                                              |
| F | 5 | 678.393<br>*340.0909729 [2+] (6)<br>*678.4365845 (23) | 661.367<br>*661.4934082 (19)     | - | 660.383                                              |
| D | 4 | 531.325<br>*531.2991943 (12)                          | 514.298                          | - | 513.314                                              |
| K | 3 | 416.298<br>*416.3016052 (17)                          | 399.272                          | - | 398.287                                              |
| L | 2 | 288.203<br>288.2720032 (3)                            | 271.177                          | - | 270.193                                              |
| R | 1 | 175.119                                               | 158.092                          | - | 157.108                                              |

### Ion distribution

| Threshold | Ion count | Matches | % matched |
|-----------|-----------|---------|-----------|
| 0         | 145       | 67      | 46        |
| 0.5       | 141       | 65      | 46        |
| 1         | 122       | 61      | 50        |
| 2         | 100       | 56      | 56        |
| 3         | 83        | 49      | 59        |
| 4         | 73        | 46      | 63        |
| 5         | 64        | 39      | 60        |
| 10        | 41        | 23      | 56        |

### Observed ions > 1%

| m/z         | Intensity                    | % max | Assignment (delta)                              |
|-------------|------------------------------|-------|-------------------------------------------------|
| 245.2513733 | 690.0338134766 <sub>s</sub>  | 1.24  |                                                 |
| 258.3065186 | 624.2426147461 <sub>s</sub>  | 1.12  | a3o (0.19)                                      |
| 266.1888428 | 644.6857910156 <sub>s</sub>  | 1.15  | b5o[2+] (0.59) : b5*[2+] (0.10) : y4[2+] (0.02) |
| 286.0686035 | 985.6896972656 <sub>s</sub>  | 1.77  | b3o (-0.03)                                     |
| 288.2720032 | 2131.7734375 <sub>s</sub>    | 3.83  | y2 (0.06)                                       |
| 304.2335815 | 1173.6070556641 <sub>s</sub> | 2.11  | b3 (0.11)                                       |
| 328.102356  | 615.0996704102 <sub>s</sub>  | 1.10  |                                                 |
| 330.5328064 | 676.0269165039 <sub>s</sub>  | 1.21  | y5o[2+] (-0.16)                                 |
| 340.0909729 | 3616.6123046875 <sub>s</sub> | 6.50  | y5[2+] (0.39) : c6[2+] (-0.53)                  |
| 346.2120972 | 970.147277832 <sub>s</sub>   | 1.74  |                                                 |
| 381.9591064 | 659.4693603516 <sub>s</sub>  | 1.18  | a7[2+] (-0.20)                                  |
| 397.4235535 | 1214.3837890625 <sub>s</sub> | 2.18  | y6[2+] (0.20)                                   |
| 401.1953125 | 1401.5740966797 <sub>s</sub> | 2.52  | b4o (0.06)                                      |
| 416.3016052 | 9559.67578125 <sub>s</sub>   | 17.19 | y3 (0.00) : y7o[2+] (-0.41)                     |

|             |                  |       |                                                                      |
|-------------|------------------|-------|----------------------------------------------------------------------|
| 417.3232117 | 2501.6142578125  | 4.49  | z7[2+] (0.11) : y7*[2+] (0.11)                                       |
| 419.2612    | 1639.9564208984  | 2.94  | b4 (0.11)                                                            |
| 425.9342041 | 13735.0087890625 | 24.70 | y7[2+] (0.20)                                                        |
| 459.6352844 | 755.1765136719   | 1.35  |                                                                      |
| 461.2037048 | 849.3011474609   | 1.52  |                                                                      |
| 481.4695129 | 5320.0517578125  | 9.56  | b9-98[2+] (0.28) : y8o[2+] (0.22) : z8[2+] (-0.26) : y8*[2+] (-0.26) |
| 488.1851807 | 1230.2458496094  | 2.21  |                                                                      |
| 490.3918152 | 6793.4619140625  | 12.21 | y8[2+] (0.14)                                                        |
| 500.8960266 | 1877.2619628906  | 3.37  |                                                                      |
| 509.0208435 | 1323.9818115234  | 2.38  |                                                                      |
| 522.2915039 | 1631.9738769531  | 2.93  |                                                                      |
| 530.2893066 | 3213.4921875     | 5.77  | b5o (0.11) : b9[2+] (0.10)                                           |
| 531.2991943 | 7033.0639648438  | 12.64 | b5* (0.14) : y4 (-0.02) : b10-98[2+] (-0.41)                         |
| 535.9144287 | 1479.9140625     | 2.66  |                                                                      |
| 546.9180908 | 9859.296875      | 17.73 | y9[2+] (0.12)                                                        |
| 548.0411987 | 3836.8210449219  | 6.90  | b5 (-0.14)                                                           |
| 556.2072754 | 1462.8933105469  | 2.63  |                                                                      |
| 563.9324951 | 1535.7369384766  | 2.76  |                                                                      |
| 565.0376587 | 2587.0161132813  | 4.65  | c5 (-0.17)                                                           |
| 569.4462891 | 1558.2145996094  | 2.80  |                                                                      |
| 577.8795166 | 3631.3381347656  | 6.53  |                                                                      |
| 587.0357056 | 11033.7216796875 | 19.84 |                                                                      |
| 601.6763916 | 2785.4187011719  | 5.00  | y10o[2+] (-0.13)                                                     |
| 602.5950928 | 2673.8481445313  | 4.80  | y10*[2+] (0.29) : z10[2+] (0.29)                                     |
| 609.9569092 | 2537.6169433594  | 4.56  |                                                                      |
| 611.1989746 | 4204.4379882813  | 7.56  | y10[2+] (0.38)                                                       |
| 616.0938721 | 2966.2026367188  | 5.33  |                                                                      |
| 643.5062866 | 8799.7890625     | 15.82 |                                                                      |
| 645.2532959 | 3151.9616699219  | 5.66  | b11[2+] (0.52) : b6o (0.05)                                          |
| 648.6986084 | 5748.7177734375  | 10.33 |                                                                      |
| 661.4934082 | 10664.0712890625 | 19.17 | y11[2+] (0.15) : y5* (0.12) : z5 (0.12)                              |
| 678.4365845 | 12802.630859375  | 23.02 | a12o[2+] (0.16) : y5 (0.04) : a12*[2+] (-0.32)                       |
| 679.5153809 | 15809.1455078125 | 28.43 |                                                                      |
| 688.1502686 | 23805.568359375  | 42.81 |                                                                      |
| 688.8763428 | 9592.416015625   | 17.25 |                                                                      |
| 694.2990723 | 40933.7578125    | 73.62 |                                                                      |
| 707.953125  | 9664.576171875   | 17.38 |                                                                      |
| 714.8560791 | 4913.634765625   | 8.83  |                                                                      |
| 720.8850098 | 13234.498046875  | 23.80 |                                                                      |
| 724.5957031 | 6293.0693359375  | 11.31 |                                                                      |
| 726.9064941 | 55601.171875     | 100   |                                                                      |
| 728.9086914 | 19338.162109375  | 34.78 |                                                                      |



|             |                  |       |                                                                    |
|-------------|------------------|-------|--------------------------------------------------------------------|
| 750.3410645 | 7755.8198242188  | 13.94 |                                                                    |
| 751.4329834 | 1451.1925048828  | 2.61  | a13[2+] (-0.36)                                                    |
| 767.5726318 | 6214.2973632813  | 11.17 |                                                                    |
| 773.2181396 | 3227.6496582031  | 5.80  | b7o (-0.07)                                                        |
| 776.5163574 | 3011.7172851563  | 5.41  | y6* (0.12) : z6 (0.12)                                             |
| 779.5775146 | 2116.4990234375  | 3.80  |                                                                    |
| 780.5419922 | 2336.337890625   | 4.20  | a14[2+] (0.23)                                                     |
| 782.3096924 | 8595.703125      | 15.45 |                                                                    |
| 801.6512451 | 5939.615234375   | 10.68 |                                                                    |
| 810.5582275 | 7364.1748046875  | 13.24 | y14-98[2+] (0.13)                                                  |
| 811.3189697 | 1023.8767089844  | 1.84  |                                                                    |
| 812.3487549 | 991.8327026367   | 1.78  |                                                                    |
| 819.9265137 | 862.731262207    | 1.55  |                                                                    |
| 832.4106445 | 3753.7995605469  | 6.75  | y7o (-0.02)                                                        |
| 850.3981934 | 33304.3359375    | 59.89 | y14o[2+] (-0.00) : y7 (-0.04) : y14*[2+] (-0.50) : z14[2+] (-0.50) |
| 851.4431152 | 13633.482421875  | 24.52 | y14*[2+] (0.54) : z14[2+] (0.54) : b15[2+] (-0.37)                 |
| 859.2803955 | 11380.5029296875 | 20.46 | y14[2+] (-0.13)                                                    |
| 860.1158447 | 5848.4189453125  | 10.51 | c15[2+] (-0.21)                                                    |
| 867.6484375 | 4433.603515625   | 7.97  | y15-98[2+] (-0.28)                                                 |
| 868.5350342 | 4460.7094726563  | 8.02  |                                                                    |
| 881.6323242 | 1874.1215820313  | 3.37  |                                                                    |
| 883.1094971 | 1757.6398925781  | 3.16  |                                                                    |
| 916.6154785 | 6558.7280273438  | 11.79 | b16o[2+] (0.26) : b16*[2+] (-0.22) : y15[2+] (-0.31)               |
| 917.4641113 | 7009.8344726563  | 12.60 | y15[2+] (0.53)                                                     |
| 923.701416  | 5219.2822265625  | 9.38  |                                                                    |
| 925.4393311 | 4067.849609375   | 7.31  | b16[2+] (0.08)                                                     |
| 931.6357422 | 5846.3046875     | 10.51 |                                                                    |
| 932.7960205 | 4748.9443359375  | 8.54  | y16-98[2+] (0.34)                                                  |
| 961.4696045 | 5404.1005859375  | 9.71  | b9-98 (0.10) : y8o (-0.00)                                         |
| 979.4541016 | 21972.0859375    | 39.51 | y8 (-0.03)                                                         |
| 980.4692383 | 11881.24609375   | 21.36 |                                                                    |
| 981.654541  | 9188.76171875    | 16.52 | y16[2+] (0.20)                                                     |
| 990.0927734 | 8347.423828125   | 15.01 | y17-98[2+] (0.12)                                                  |
| 991.1417236 | 6263.9169921875  | 11.26 | c17[2+] (-0.23)                                                    |
| 999.659668  | 2103.5739746094  | 3.78  |                                                                    |
| 1013.175781 | 2878.8208007813  | 5.17  | a9o (-0.17)                                                        |
| 1031.714844 | 4795.759765625   | 8.62  | a9 (0.35)                                                          |
| 1039.268799 | 6214.6123046875  | 11.17 | y17[2+] (0.30)                                                     |
| 1040.697144 | 8162.7490234375  | 14.68 | y18-98[2+] (0.20)                                                  |
| 1045.761597 | 3463.6518554688  | 6.22  |                                                                    |
| 1046.719604 | 2465.8344726563  | 4.43  | b18[2+] (-0.19)                                                    |
| 1062.23999  | 5957.4536132813  | 10.71 | b10-98 (-0.17)                                                     |

|             |                  |       |                                                                                              |
|-------------|------------------|-------|----------------------------------------------------------------------------------------------|
| 1063.000854 | 3567.9812011719, | 6.41  | b10-98 (0.58)                                                                                |
| 1080.865234 | 1783.0874023438, | 3.20  | a19o[2+] (0.41) : y18o[2+] (0.38) : a19*[2+] (-0.08) :<br>y18*[2+] (-0.10) : z18[2+] (-0.10) |
| 1089.823364 | 6893.3447265625, | 12.39 | a19[2+] (0.36) : y18[2+] (0.33)                                                              |
| 1090.648315 | 1729.0241699219, | 3.10  |                                                                                              |
| 1092.535034 | 7909.5966796875, | 14.22 | y9 (-0.03)                                                                                   |
| 1093.514526 | 4765.3344726563, | 8.57  |                                                                                              |
| 1094.380005 | 2362.0949707031, | 4.24  | b19o[2+] (-0.07) : b19*[2+] (-0.56)                                                          |
| 1112.612549 | 679.0979614258,  | 1.22  |                                                                                              |
| 1127.02417  | 938.2778930664,  | 1.68  |                                                                                              |
| 1128.579468 | 653.1906738281,  | 1.17  |                                                                                              |
| 1146.324585 | 1603.5051269531, | 2.88  |                                                                                              |
| 1147.503906 | 1270.75390625,   | 2.28  | y19[2+] (0.50)                                                                               |
| 1154.477783 | 645.1929321289,  | 1.16  |                                                                                              |
| 1172.467041 | 1453.6684570313, | 2.61  |                                                                                              |
| 1173.457764 | 2450.9851074219, | 4.40  |                                                                                              |
| 1186.58667  | 655.4829101563,  | 1.17  |                                                                                              |
| 1203.620117 | 1497.8070068359, | 2.69  | y10* (0.01) : z10 (0.01)                                                                     |
| 1215.69165  | 574.198425293,   | 1.03  |                                                                                              |
| 1216.639893 | 692.3986816406,  | 1.24  |                                                                                              |
| 1245.207153 | 581.0895996094,  | 1.04  |                                                                                              |
| 1284.410156 | 661.1965942383,  | 1.18  |                                                                                              |
| 1285.521118 | 1867.4453125,    | 3.35  |                                                                                              |
| 1286.311279 | 1264.1208496094, | 2.27  |                                                                                              |
| 1288.540771 | 1879.2366943359, | 3.37  | b11 (0.08)                                                                                   |

S1087

or

S1088

# ProPhosSI MS/MS report

Mass: 558.934875488281 Charge: 3+

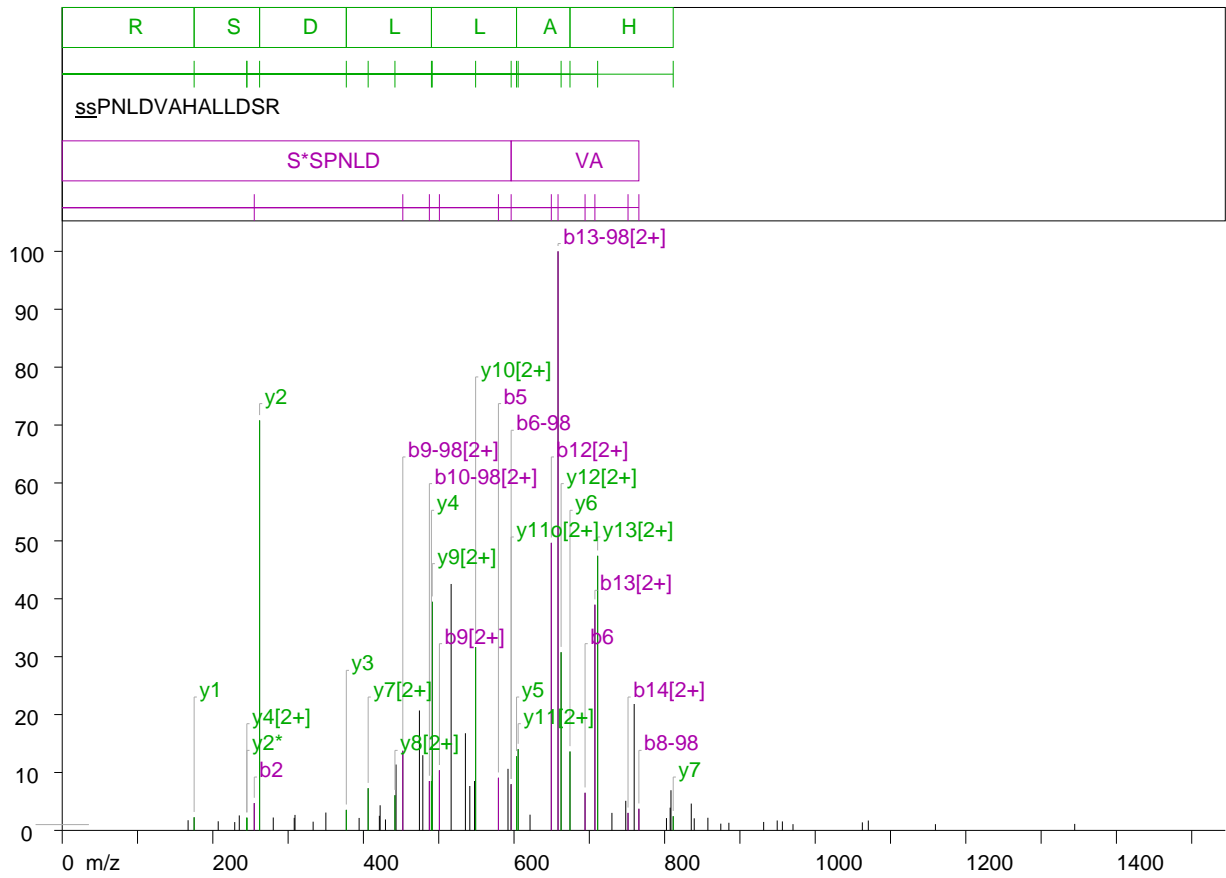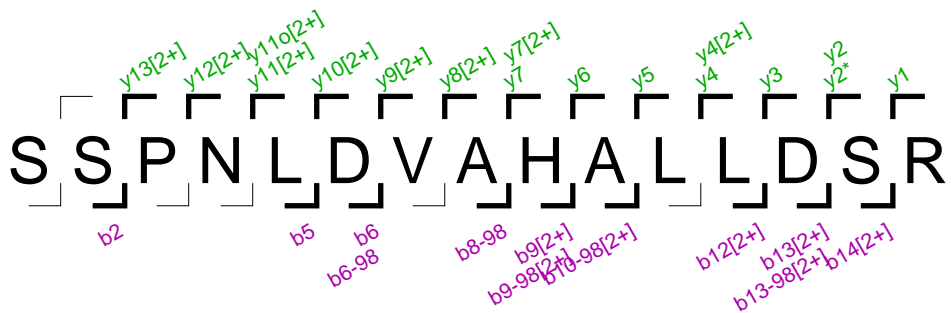

## Cav3.2 Rat

(34) 1087 [ssPNLDVAHALLSR 1101 1673.777 \(0.0037\) Da](#)

|                         |     |
|-------------------------|-----|
| Parent Ion              | m/z |
| No parent ions observed |     |

### Modifications and supporting evidence

| Position | Residue ID     | Modification | Evidence                |
|----------|----------------|--------------|-------------------------|
| 1 or 2   | (1087 or 1088) | Phospho (ST) | b6-98, b8-98, b9-98[2+] |

### Spectrum interpretation

| Rule                                   | passed/tests | Description                                                                                                                                                                                                                                                                                                                                                                                                                                                                                                                                                                                                                                                                                                                                               |
|----------------------------------------|--------------|-----------------------------------------------------------------------------------------------------------------------------------------------------------------------------------------------------------------------------------------------------------------------------------------------------------------------------------------------------------------------------------------------------------------------------------------------------------------------------------------------------------------------------------------------------------------------------------------------------------------------------------------------------------------------------------------------------------------------------------------------------------|
| Parent ions present                    | 0/1          | Parent ions corresponding to the parent fragment - 1 phosphate ions were not found                                                                                                                                                                                                                                                                                                                                                                                                                                                                                                                                                                                                                                                                        |
| Three -98 Ions present                 | 1/1          | 5 des-phospho fragment ions were found.                                                                                                                                                                                                                                                                                                                                                                                                                                                                                                                                                                                                                                                                                                                   |
| Unique -98 transitions present         | 0/1          | b6-98, b8-98, b9-98[2+] support phosphorylation at position 1 or 2                                                                                                                                                                                                                                                                                                                                                                                                                                                                                                                                                                                                                                                                                        |
| Four Sequential b or y ions            | 1/1          | Sequence of four y ions found from y1 to y4.                                                                                                                                                                                                                                                                                                                                                                                                                                                                                                                                                                                                                                                                                                              |
| Five of six sequential ions present    | 1/1          | Five of Six ions found between y0 and y5<br>Five of Six ions found between y1 and y6<br>Five of Six ions found between y2 and y7<br>Five of Six ions found between y3 and y8<br>Five of Six ions found between y4 and y9<br>Five of Six ions found between y5 and y10<br>Five of Six ions found between y6 and y11<br>Five of Six ions found between y7 and y12<br>Five of Six ions found between y8 and y13<br>Five of Six ions found between y9 and y14                                                                                                                                                                                                                                                                                                 |
| Proline directed fragmentation pattern | 1/1          | NOTE: S-P is a low abundance fragmentation.<br>PASS: y13> y12 with ratio 1.54<br>No proline ions at b3-98                                                                                                                                                                                                                                                                                                                                                                                                                                                                                                                                                                                                                                                 |
| PhosphoTyrosine transition present     | 0/0          | 0 of 0 phosphotyrosine transitions were found.                                                                                                                                                                                                                                                                                                                                                                                                                                                                                                                                                                                                                                                                                                            |
| Six of top ten ions identified         | 9/6          | ion 1 (mass: 658.4641113: intensity: 39516.67578125) assigned 2 times<br>ion 2 (mass: 262.1118774: intensity: 27977.39453125) assigned 1 times<br>ion 3 (mass: 649.5144043: intensity: 19623.23828125) assigned 2 times<br>ion 4 (mass: 711.0540771: intensity: 18739.095703125) assigned 2 times<br>ion 5 (mass: 516.4977417: intensity: 16816.513671875) assigned 0 times<br>ion 6 (mass: 491.3848572: intensity: 15602.033203125) assigned 1 times<br>ion 7 (mass: 707.4031982: intensity: 15402.78125) assigned 1 times<br>ion 8 (mass: 548.9962769: intensity: 12511.3466796875) assigned 1 times<br>ion 9 (mass: 662.5339355: intensity: 12158.35546875) assigned 1 times<br>ion 10 (mass: 759.5697021: intensity: 8625.525390625) assigned 1 times |

### Ion Table

33 ions assigned of 53 ions above threshold (62%).

### N-terminal ions

| AA | N-ion | b                                  | b*       | b-98                                | bo       |
|----|-------|------------------------------------|----------|-------------------------------------|----------|
| S  | 1     | 88.039                             | 71.013   | -                                   | 70.029   |
| s  | 2     | 255.038<br>255.0193481 (4)         | 238.011  | 157.052                             | 237.027  |
| P  | 3     | 352.090                            | 335.064  | 254.105                             | 334.080  |
| N  | 4     | 466.133                            | 449.107  | 368.147                             | 448.123  |
| L  | 5     | 579.217<br>*579.2989502 (9)        | 562.191  | 481.232                             | 561.207  |
| D  | 6     | 694.244<br>694.3200684 (6)         | 677.218  | 596.259<br>*596.1719971 (7)         | 676.234  |
| V  | 7     | 793.313                            | 776.286  | 695.327                             | 775.302  |
| A  | 8     | 864.350                            | 847.323  | 766.364<br>*765.8105469 (3)         | 846.339  |
| H  | 9     | 1001.409<br>500.9076538 [2+] (10)  | 984.382  | 903.423<br>452.3141174 [2+] (13)    | 983.398  |
| A  | 10    | 1072.446                           | 1055.419 | 974.460<br>*487.5833435 [2+] (8)    | 1054.435 |
| L  | 11    | 1185.530                           | 1168.504 | 1087.544                            | 1167.519 |
| L  | 12    | 1298.614<br>*649.5144043 [2+] (49) | 1281.588 | 1200.628                            | 1280.604 |
| D  | 13    | 1413.641<br>707.4031982 [2+] (38)  | 1396.615 | 1315.655<br>*658.4641113 [2+] (100) | 1395.631 |
| S  | 14    | 1500.673<br>751.4056396 [2+] (3)   | 1483.647 | 1402.687                            | 1482.663 |
| R  | 15    | -                                  | -        | -                                   | -        |

### C-terminal ions

| AA | C-ion | y                                                   | y*                          | y-98     | yo                                |
|----|-------|-----------------------------------------------------|-----------------------------|----------|-----------------------------------|
| S  | 15    | -                                                   | -                           | -        | -                                 |
| s  | 14    | 1587.753                                            | 1570.726                    | 1489.767 | 1569.742                          |
| P  | 13    | 1420.754<br>*711.0540771 [2+] (47)                  | 1403.728                    | -        | 1402.744                          |
| N  | 12    | 1323.702<br>662.5339355 [2+] (30)                   | 1306.675                    | -        | 1305.691                          |
| L  | 11    | 1209.659<br>605.4827271 [2+] (14)                   | 1192.632                    | -        | 1191.648<br>*596.1719971 [2+] (7) |
| D  | 10    | 1096.575<br>548.9962769 [2+] (31)                   | 1079.548                    | -        | 1078.564                          |
| V  | 9     | 981.548<br>491.3848572 [2+] (39)                    | 964.521                     | -        | 963.537                           |
| A  | 8     | 882.479<br>441.8600769 [2+] (6)                     | 865.453                     | -        | 864.469                           |
| H  | 7     | 811.442<br>811.4112549 (2)<br>406.2906189 [2+] (7)  | 794.416                     | -        | 793.432                           |
| A  | 6     | 674.383<br>674.3331299 (13)                         | 657.357                     | -        | 656.373                           |
| L  | 5     | 603.346<br>603.34021 (12)                           | 586.320                     | -        | 585.336                           |
| L  | 4     | 490.262<br>490.2930908 (8)<br>*245.1826172 [2+] (2) | 473.236                     | -        | 472.251                           |
| D  | 3     | 377.178<br>377.2614746 (3)                          | 360.151                     | -        | 359.167                           |
| S  | 2     | 262.151<br>262.1118774 (70)                         | 245.124<br>*245.1826172 (2) | -        | 244.140                           |

|   |   |                            |         |   |         |
|---|---|----------------------------|---------|---|---------|
| R | 1 | 175.119<br>175.1785431 (2) | 158.092 | - | 157.108 |
|---|---|----------------------------|---------|---|---------|

### Ion distribution

| Threshold | Ion count | Matches | % matched |
|-----------|-----------|---------|-----------|
| 0         | 106       | 45      | 42        |
| 0.5       | 90        | 41      | 45        |
| 1         | 68        | 36      | 52        |
| 2         | 53        | 33      | 62        |
| 3         | 40        | 28      | 70        |
| 4         | 34        | 25      | 73        |
| 5         | 31        | 24      | 77        |
| 10        | 20        | 15      | 75        |

### Observed ions > 1%

| m/z         | Intensity                    | % max | Assignment (delta)                      |
|-------------|------------------------------|-------|-----------------------------------------|
| 167.1596069 | 693.8079833984 <sub>3</sub>  | 1.75  | b3o[2+] (-0.38)                         |
| 175.1785431 | 893.7856445313 <sub>3</sub>  | 2.26  | y1 (0.05)                               |
| 207.1580505 | 622.6768798828 <sub>3</sub>  | 1.57  |                                         |
| 229.0918579 | 566.4796142578 <sub>3</sub>  | 1.43  |                                         |
| 235.130249  | 1021.4099121094 <sub>3</sub> | 2.58  |                                         |
| 245.1826172 | 865.4766235352 <sub>3</sub>  | 2.19  | z2 (0.05) : y2* (0.05) : y4[2+] (-0.45) |
| 255.0193481 | 1861.2265625 <sub>3</sub>    | 4.70  | b2 (-0.01)                              |
| 262.1118774 | 27977.39453125 <sub>3</sub>  | 70.79 | y2 (-0.03)                              |
| 280.2444458 | 879.6969604492 <sub>3</sub>  | 2.22  |                                         |
| 308.098999  | 855.6200561523 <sub>3</sub>  | 2.16  |                                         |
| 309.1115112 | 1056.8243408203 <sub>3</sub> | 2.67  |                                         |
| 333.2046509 | 594.9755859375 <sub>3</sub>  | 1.50  | a6[2+] (-0.42)                          |
| 350.1237183 | 1217.6734619141 <sub>3</sub> | 3.08  |                                         |
| 377.2614746 | 1401.7498779297 <sub>3</sub> | 3.54  | y3 (0.08)                               |
| 394.2868958 | 850.4694824219 <sub>3</sub>  | 2.15  |                                         |
| 406.2906189 | 2877.7055664063 <sub>3</sub> | 7.28  | y7[2+] (0.06)                           |
| 421.1526794 | 995.5368652344 <sub>3</sub>  | 2.51  | a4* (0.04)                              |
| 422.2046204 | 1713.8237304688 <sub>3</sub> | 4.33  |                                         |
| 429.2610779 | 746.5391845703 <sub>3</sub>  | 1.88  |                                         |
| 441.8600769 | 2398.0634765625 <sub>3</sub> | 6.06  | y8[2+] (0.11)                           |
| 443.309845  | 4495.8779296875 <sub>3</sub> | 11.37 |                                         |
| 452.3141174 | 5432.6811523438 <sub>3</sub> | 13.74 | b9-98[2+] (0.09)                        |
| 474.3661804 | 8183.7109375 <sub>3</sub>    | 20.70 |                                         |
| 478.8791504 | 5132.1474609375 <sub>3</sub> | 12.98 | a9*[2+] (0.18)                          |
| 487.5833435 | 3365.26953125 <sub>3</sub>   | 8.51  | a9[2+] (0.37) : b10-98[2+] (-0.15)      |
| 490.2930908 | 3372.8647460938 <sub>3</sub> | 8.53  | y4 (0.03)                               |

|             |                   |       |                                               |
|-------------|-------------------|-------|-----------------------------------------------|
| 491.3848572 | 15602.033203125,  | 39.48 | y9[2+] (0.10)                                 |
| 500.9076538 | 4097.392578125,   | 10.36 | b9[2+] (-0.30)                                |
| 516.4977417 | 16816.513671875,  | 42.55 |                                               |
| 535.4487915 | 6630.6298828125,  | 16.77 |                                               |
| 541.288269  | 3030.318359375,   | 7.66  |                                               |
| 547.5808105 | 3370.9365234375,  | 8.53  |                                               |
| 548.9962769 | 12511.3466796875, | 31.66 | y10[2+] (0.20)                                |
| 579.2989502 | 3589.7546386719,  | 9.08  | b5 (0.08) : a11[2+] (0.02)                    |
| 591.9909668 | 4201.6831054688,  | 10.63 |                                               |
| 596.1719971 | 3149.162109375,   | 7.96  | c5 (-0.07) : b6-98 (-0.08) : y11o[2+] (-0.15) |
| 603.34021   | 5050.7993164063,  | 12.78 | y5 (-0.00)                                    |
| 605.4827271 | 5544.5751953125,  | 14.03 | y11[2+] (0.14)                                |
| 621.2746582 | 1073.3537597656,  | 2.71  |                                               |
| 649.5144043 | 19623.23828125,   | 49.65 | a6* (0.29) : b12[2+] (-0.29)                  |
| 658.4641113 | 39516.67578125,   | 100   | c12[2+] (0.13) : b13-98[2+] (0.13)            |
| 662.5339355 | 12158.35546875,   | 30.76 | y12[2+] (0.17)                                |
| 674.3331299 | 5382.78515625,    | 13.62 | y6 (-0.05)                                    |
| 694.3200684 | 2566.9106445313,  | 6.49  | b6 (0.07)                                     |
| 707.4031982 | 15402.78125,      | 38.97 | b13[2+] (0.07)                                |
| 711.0540771 | 18739.095703125,  | 47.42 | y13[2+] (0.17) : c6 (-0.21)                   |
| 730.0187988 | 1195.9942626953,  | 3.02  |                                               |
| 748.3735352 | 2019.1495361328,  | 5.10  | a7* (0.08)                                    |
| 751.4056396 | 1194.3245849609,  | 3.02  | b14[2+] (0.56)                                |
| 759.5697021 | 8625.525390625,   | 21.82 | c14[2+] (0.21)                                |
| 765.8105469 | 1475.078125,      | 3.73  | a7 (0.49) : b8-98 (-0.55)                     |
| 802.4560547 | 840.2169189453,   | 2.12  |                                               |
| 807.3773193 | 1552.0040283203,  | 3.92  |                                               |
| 808.4294434 | 2741.0615234375,  | 6.93  | x14[2+] (0.05)                                |
| 811.4112549 | 964.5718994141,   | 2.44  | y7 (-0.03)                                    |
| 835.3955078 | 1830.4609375,     | 4.63  |                                               |
| 839.3262939 | 824.6988525391,   | 2.08  | x7 (-0.11)                                    |
| 857.4379883 | 862.6449584961,   | 2.18  |                                               |
| 874.5823975 | 459.7014770508,   | 1.16  |                                               |
| 885.3289795 | 519.8120727539,   | 1.31  |                                               |
| 931.5186768 | 576.5516357422,   | 1.45  |                                               |
| 949.5180664 | 675.8471679688,   | 1.71  |                                               |
| 956.3990479 | 612.3174438477,   | 1.54  | a9* (0.01)                                    |
| 970.47229   | 425.8800354004,   | 1.07  |                                               |
| 1062.589722 | 548.4889526367,   | 1.38  |                                               |
| 1070.519043 | 672.7462768555,   | 1.70  |                                               |
| 1159.650879 | 426.2090148926,   | 1.07  |                                               |
| 1344.612305 | 442.6635437012,   | 1.12  |                                               |



**S1104**

# ProPhosSI MS/MS report

Mass: 820.867717 Charge: 2+

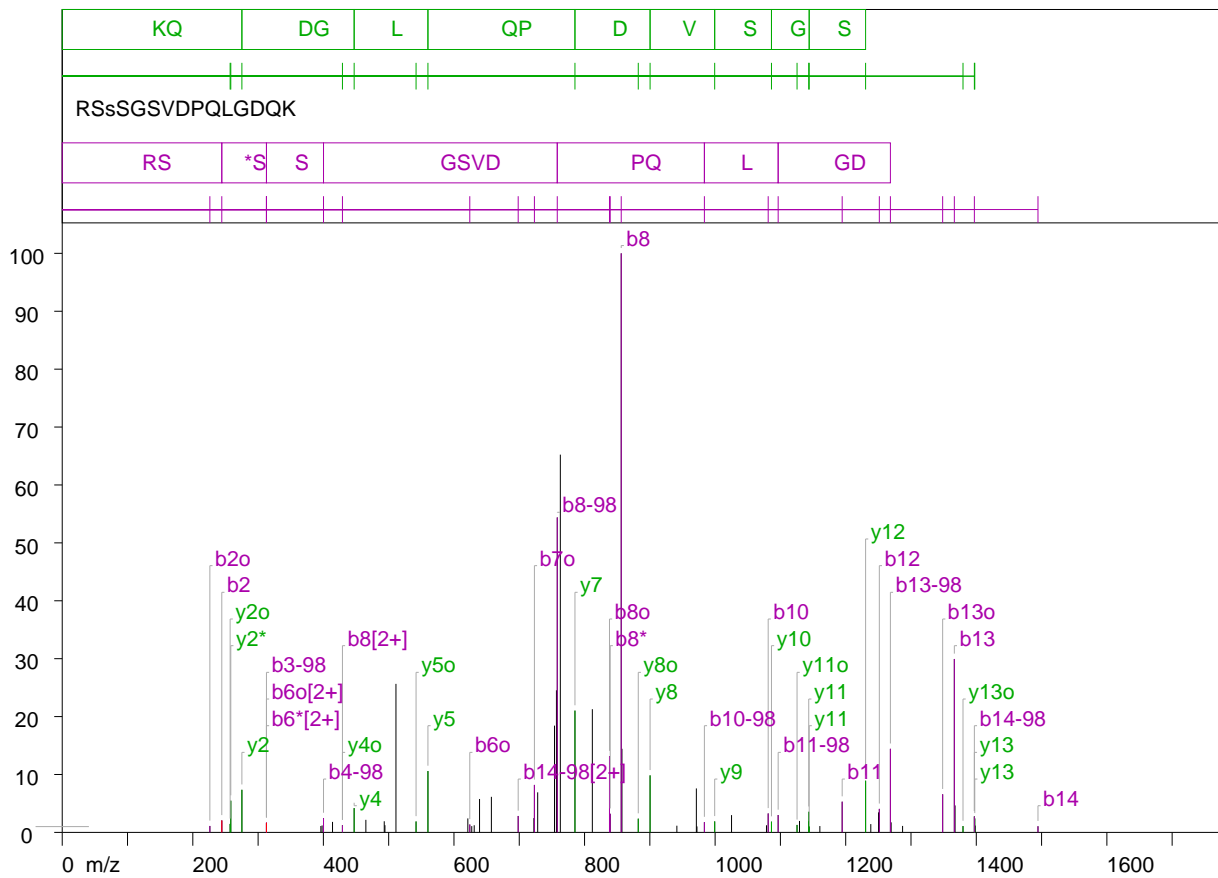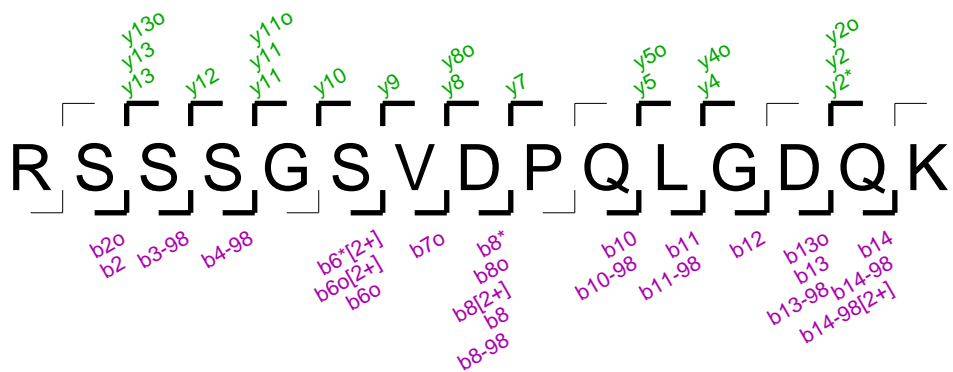

## Cav3.2 Rat

(73) 1102 RSsSGSVDPQLGDQK 1116 1639.720 (-0.0005) Da

|                         |     |
|-------------------------|-----|
| Parent Ion              | m/z |
| No parent ions observed |     |

### Modifications and supporting evidence

| Position | Residue ID | Modification | Evidence         |
|----------|------------|--------------|------------------|
| 3        | (1104)     | Phospho (ST) | b2 => b3-98; y12 |

### Spectrum interpretation

| Rule                                   | passed/tests | Description                                                                                                                                                                                                                                                                                                                                                                                                                                                                                                                                                                                                                                                          |
|----------------------------------------|--------------|----------------------------------------------------------------------------------------------------------------------------------------------------------------------------------------------------------------------------------------------------------------------------------------------------------------------------------------------------------------------------------------------------------------------------------------------------------------------------------------------------------------------------------------------------------------------------------------------------------------------------------------------------------------------|
| Parent ions present                    | 0/1          | Parent ions corresponding to the parent fragment - 1 phosphate ions were not found                                                                                                                                                                                                                                                                                                                                                                                                                                                                                                                                                                                   |
| Three -98 Ions present                 | 1/1          | 7 des-phospho fragment ions were found.                                                                                                                                                                                                                                                                                                                                                                                                                                                                                                                                                                                                                              |
| Unique -98 transitions present         | 1/1          | transition b2 to b3-98 support unique phosphorylation at position 3<br><br/>                                                                                                                                                                                                                                                                                                                                                                                                                                                                                                                                                                                         |
| Four Sequential b or y ions            | 1/1          | Sequence of four y ions found from y7 to y10.                                                                                                                                                                                                                                                                                                                                                                                                                                                                                                                                                                                                                        |
| Five of six sequential ions present    | 1/1          | Five of Six ions found between y4 and y9<br>Five of Six ions found between y5 and y10<br>Five of Six ions found between y6 and y11<br>Five of Six ions found between y7 and y12<br>Five of Six ions found between y8 and y13                                                                                                                                                                                                                                                                                                                                                                                                                                         |
| Proline directed fragmentation pattern | 2/2          | PASS: y7> y6<br/><br>PASS: b9-98< b8-98<br/>                                                                                                                                                                                                                                                                                                                                                                                                                                                                                                                                                                                                                         |
| PhosphoTyrosine transition present     | 0/0          | 0 of 0 phosphotyrosine transitions were found.                                                                                                                                                                                                                                                                                                                                                                                                                                                                                                                                                                                                                       |
| Six of top ten ions identified         | 5/6          | ion 1 (mass: 856.197: intensity: 4526.84)<br>assigned 1 times<br>ion 2 (mass: 762.920: intensity: 2953.19)<br>assigned 0 times<br>ion 3 (mass: 758.204: intensity: 2462.35)<br>assigned 2 times<br>ion 4 (mass: 1366.384: intensity: 1355.72)<br>assigned 1 times<br>ion 5 (mass: 511.157: intensity: 1161.18)<br>assigned 0 times<br>ion 6 (mass: 756.957: intensity: 1110.94)<br>assigned 1 times<br>ion 7 (mass: 811.927: intensity: 963.19)<br>assigned 0 times<br>ion 8 (mass: 785.301: intensity: 952.04)<br>assigned 1 times<br>ion 9 (mass: 753.976: intensity: 834.64)<br>assigned 0 times<br>ion 10 (mass: 857.288: intensity: 653.76)<br>assigned 0 times |

### Ion Table

41 ions assigned of 71 ions above threshold (57%).

#### N-terminal ions

| AA | N-ion | b                      | b*      | b-98                    | bo                      |
|----|-------|------------------------|---------|-------------------------|-------------------------|
| R  | 1     | 157.108                | 140.082 | -                       | 139.098                 |
| S  | 2     | 244.140<br>244.397 (2) | 227.114 | -                       | 226.130<br>*226.119 (1) |
| s  | 3     | 411.139                | 394.112 | 313.153<br>*312.824 (1) | 393.128                 |
| S  | 4     | 498.171                | 481.144 | 400.185                 | 480.160                 |

|   |    |                                               |                              |                                               |                                             |
|---|----|-----------------------------------------------|------------------------------|-----------------------------------------------|---------------------------------------------|
| - | -  | -                                             | -                            | 400.199 (2)                                   | -                                           |
| G | 5  | 555.192                                       | 538.166                      | 457.206                                       | 537.182                                     |
| S | 6  | 642.224                                       | 625.198<br>*312.824 [2+] (1) | 544.238                                       | 624.214<br>*312.824 [2+] (1)<br>624.214 (1) |
| V | 7  | 741.293                                       | 724.266                      | 643.307                                       | 723.282<br>723.214 (8)                      |
| D | 8  | 856.320<br>*429.202 [2+] (1)<br>856.197 (100) | 839.293<br>839.292 (3)       | 758.334<br>*758.204 (54)                      | 838.309<br>838.189 (13)                     |
| P | 9  | 953.372                                       | 936.346                      | 855.387                                       | 935.362                                     |
| Q | 10 | 1081.431<br>1081.286 (3)                      | 1064.405                     | 983.445<br>983.553 (1)                        | 1063.420                                    |
| L | 11 | 1194.515<br>1194.603 (5)                      | 1177.489                     | 1096.529<br>1096.565 (3)                      | 1176.505                                    |
| G | 12 | 1251.537<br>1251.502 (4)                      | 1234.510                     | 1153.551                                      | 1233.526                                    |
| D | 13 | 1366.564<br>1366.384 (29)                     | 1349.537                     | 1268.578<br>*1268.445 (14)                    | 1348.553<br>1348.500 (6)                    |
| Q | 14 | 1494.622<br>1494.480 (1)                      | 1477.596                     | 1396.636<br>*1397.048 (2)<br>698.374 [2+] (2) | 1476.612                                    |
| K | 15 | -                                             | -                            | -                                             | -                                           |

### C-terminal ions

| AA | C-ion | y                                         | y*                      | y-98     | yo                       |
|----|-------|-------------------------------------------|-------------------------|----------|--------------------------|
| R  | 15    | -                                         | -                       | -        | -                        |
| S  | 14    | 1484.627                                  | 1467.600                | 1386.641 | 1466.616                 |
| s  | 13    | 1397.595<br>1397.665 (2)<br>*1397.048 (2) | 1380.568                | 1299.609 | 1379.584<br>1379.654 (1) |
| S  | 12    | 1230.596<br>1230.465 (8)                  | 1213.570                | -        | 1212.586                 |
| G  | 11    | 1143.564<br>1144.052 (1)<br>1143.389 (3)  | 1126.538                | -        | 1125.554<br>1125.492 (1) |
| S  | 10    | 1086.543<br>1086.295 (1)                  | 1069.516                | -        | 1068.532                 |
| V  | 9     | 999.511<br>999.320 (1)                    | 982.484                 | -        | 981.500                  |
| D  | 8     | 900.442<br>900.393 (9)                    | 883.416                 | -        | 882.432<br>882.265 (2)   |
| P  | 7     | 785.415<br>785.301 (21)                   | 768.389                 | -        | 767.405                  |
| Q  | 6     | 688.363                                   | 671.336                 | -        | 670.352                  |
| L  | 5     | 560.304<br>560.118 (10)                   | 543.277                 | -        | 542.293<br>541.936 (1)   |
| G  | 4     | 447.220<br>447.141 (4)                    | 430.193                 | -        | 429.209<br>*429.202 (1)  |
| D  | 3     | 390.198                                   | 373.172                 | -        | 372.188                  |
| Q  | 2     | 275.171<br>275.172 (7)                    | 258.145<br>*258.165 (5) | -        | 257.161<br>257.173 (1)   |
| K  | 1     | 147.113                                   | 130.086                 | -        | 129.102                  |

### Ion distribution

| Threshold | Ion count | Matches | % matched |
|-----------|-----------|---------|-----------|
| 0         | 79        | 45      | 56        |
| 0.5       | 75        | 44      | 58        |
| 1         | 70        | 40      | 57        |
| 2         | 42        | 28      | 66        |
| 3         | 31        | 20      | 64        |
| 4         | 27        | 17      | 62        |
| 5         | 24        | 15      | 62        |
| 10        | 13        | 8       | 61        |

### Observed ions > 1%

| m/z     | Intensity            | % max | Assignment (delta)                               |
|---------|----------------------|-------|--------------------------------------------------|
| 226.119 | 50.33 <sub>,</sub>   | 1.11  | b2o (-0.01) : a4o[2+] (-0.46)                    |
| 244.397 | 93.49 <sub>,</sub>   | 2.06  | b2 (0.25)                                        |
| 257.173 | 66.37 <sub>,</sub>   | 1.46  | y2o (0.01)                                       |
| 258.165 | 248.04 <sub>,</sub>  | 5.47  | c4[2+] (0.06) : y2* (0.01) : z2 (0.01)           |
| 275.172 | 333.11 <sub>,</sub>  | 7.35  | y2 (6.49)                                        |
| 312.824 | 75.54 <sub>,</sub>   | 1.66  | b6o[2+] (0.21) : b6*[2+] (-0.27) : b3-98 (-0.32) |
| 396.126 | 49.97 <sub>,</sub>   | 1.10  |                                                  |
| 398.031 | 54.45 <sub>,</sub>   | 1.20  |                                                  |
| 400.199 | 111.79 <sub>,</sub>  | 2.46  | b4-98 (0.01)                                     |
| 413.994 | 82.15 <sub>,</sub>   | 1.81  |                                                  |
| 429.202 | 56.24 <sub>,</sub>   | 1.24  | b8[2+] (0.53) : y4o (-0.00)                      |
| 447.141 | 190.06 <sub>,</sub>  | 4.19  | y4 (-0.07)                                       |
| 465.056 | 98.26 <sub>,</sub>   | 2.17  | x8[2+] (0.33)                                    |
| 493.217 | 87.02 <sub>,</sub>   | 1.92  |                                                  |
| 494.289 | 56.19 <sub>,</sub>   | 1.24  |                                                  |
| 511.157 | 1161.18 <sub>,</sub> | 25.65 |                                                  |
| 541.936 | 85.41 <sub>,</sub>   | 1.88  | y5o (-0.35)                                      |
| 560.118 | 479.62 <sub>,</sub>  | 10.59 | y5 (-0.18)                                       |
| 621.259 | 109.33 <sub>,</sub>  | 2.41  |                                                  |
| 624.214 | 61.62 <sub>,</sub>   | 1.36  | b6o (-0.00)                                      |
| 627.227 | 49.10 <sub>,</sub>   | 1.08  |                                                  |
| 630.988 | 55.84 <sub>,</sub>   | 1.23  |                                                  |
| 639.154 | 261.22 <sub>,</sub>  | 5.77  |                                                  |
| 657.306 | 278.10 <sub>,</sub>  | 6.14  |                                                  |
| 698.374 | 128.39 <sub>,</sub>  | 2.83  | b14-98[2+] (-0.44)                               |
| 722.437 | 112.04 <sub>,</sub>  | 2.47  |                                                  |
| 723.214 | 371.05 <sub>,</sub>  | 8.19  | b7o (-0.06)                                      |
| 728.212 | 313.19 <sub>,</sub>  | 6.91  |                                                  |
| 753.976 | 834.64 <sub>,</sub>  | 18.43 |                                                  |
| 756.957 | 1110.94 <sub>,</sub> | 24.54 | x14[2+] (0.14)                                   |

|          |          |       |                              |
|----------|----------|-------|------------------------------|
| 758.204  | 2462.35, | 54.39 | c7 (-0.11) : b8-98 (-0.13)   |
| 762.920  | 2953.19, | 65.23 |                              |
| 785.301  | 952.04,  | 21.03 | y7 (-0.11)                   |
| 811.927  | 963.19,  | 21.27 |                              |
| 838.189  | 595.94,  | 13.16 | b8o (-0.12)                  |
| 839.292  | 145.62,  | 3.21  | b8* (-0.00)                  |
| 856.197  | 4526.84, | 100   | b8 (-0.12)                   |
| 857.288  | 653.76,  | 14.44 |                              |
| 882.265  | 107.33,  | 2.37  | y8o (-0.16)                  |
| 900.393  | 445.65,  | 9.84  | y8 (-0.04)                   |
| 941.418  | 52.34,   | 1.15  |                              |
| 971.253  | 343.69,  | 7.59  |                              |
| 972.144  | 46.78,   | 1.03  |                              |
| 983.553  | 80.12,   | 1.76  | b10-98 (0.10)                |
| 999.320  | 85.88,   | 1.89  | y9 (-0.19)                   |
| 1025.163 | 135.14,  | 2.98  |                              |
| 1078.667 | 55.77,   | 1.23  |                              |
| 1081.286 | 148.17,  | 3.27  | b10 (-0.14)                  |
| 1086.295 | 83.83,   | 1.85  | y10 (-0.24)                  |
| 1096.565 | 135.82,  | 3.00  | b11-98 (0.03)                |
| 1125.492 | 58.43,   | 1.29  | y11o (-0.06)                 |
| 1129.252 | 89.43,   | 1.97  |                              |
| 1143.389 | 160.99,  | 3.55  | y11 (-0.17)                  |
| 1160.400 | 49.61,   | 1.09  |                              |
| 1194.603 | 240.14,  | 5.30  | b11 (0.08)                   |
| 1230.465 | 404.03,  | 8.92  | y12 (-0.13)                  |
| 1238.422 | 64.95,   | 1.43  |                              |
| 1250.269 | 156.63,  | 3.46  |                              |
| 1251.502 | 183.81,  | 4.06  | b12 (-0.03)                  |
| 1268.445 | 653.33,  | 14.43 | c12 (-0.11) : b13-98 (-0.13) |
| 1269.593 | 78.71,   | 1.73  |                              |
| 1287.135 | 50.60,   | 1.11  |                              |
| 1348.500 | 297.87,  | 6.58  | b13o (-0.05)                 |
| 1366.384 | 1355.72, | 29.94 | b13 (-0.18)                  |
| 1367.479 | 210.86,  | 4.65  |                              |
| 1379.654 | 49.48,   | 1.09  | y13o (0.06)                  |
| 1397.048 | 124.99,  | 2.76  | b14-98 (0.41) : y13 (-0.54)  |
| 1397.665 | 109.24,  | 2.41  | y13 (0.06)                   |
| 1398.353 | 53.55,   | 1.18  |                              |
| 1494.480 | 48.03,   | 1.06  | b14 (-0.14)                  |

S1144

# ProPhosSI MS/MS report

Mass: 493.710083007813 Charge: 2+

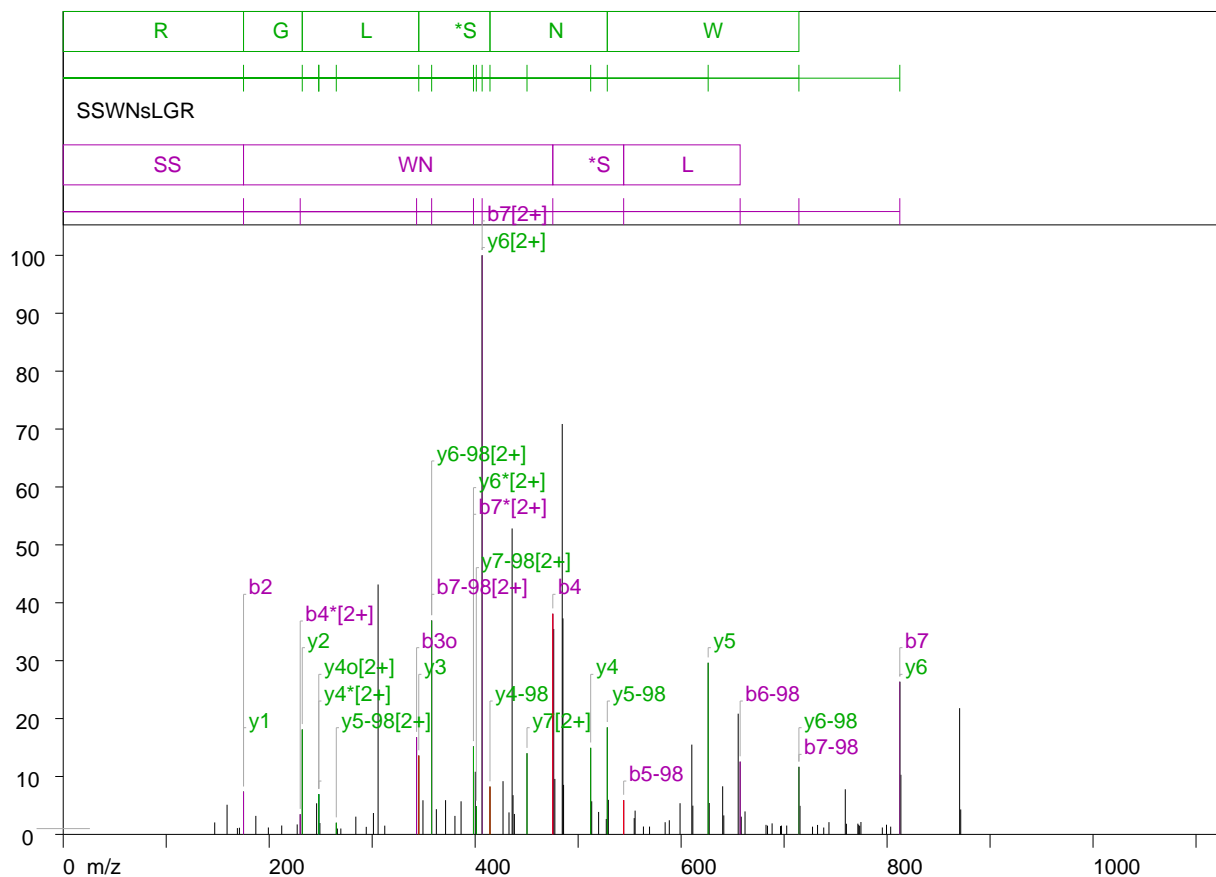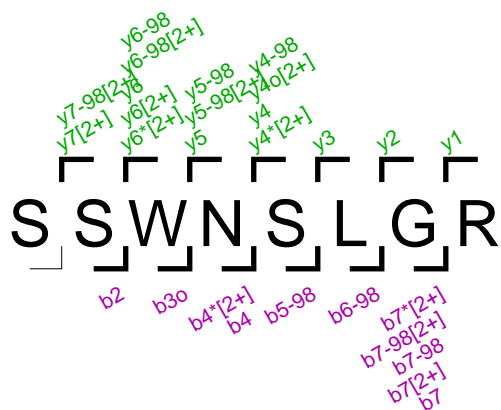



## Cav3.2 Rat

(34) 1140 SSWNsLGR 11477 985.401 (0.0026) Da

### Modifications and supporting evidence

| Position | Residue ID | Modification | Evidence                  |
|----------|------------|--------------|---------------------------|
| 5        | (1144)     | Phospho (ST) | b4 => b5-98 : y3 => y4-98 |

### Spectrum interpretation

| Rule                                   | passed/tests | Description                                                                                                                                                                                                                                                                                                                                                                                                                                                                                                                                                                                                                                                                                                                                          |
|----------------------------------------|--------------|------------------------------------------------------------------------------------------------------------------------------------------------------------------------------------------------------------------------------------------------------------------------------------------------------------------------------------------------------------------------------------------------------------------------------------------------------------------------------------------------------------------------------------------------------------------------------------------------------------------------------------------------------------------------------------------------------------------------------------------------------|
| Parent ions present                    | 0/1          | Parent ions corresponding to the parent fragment - 1 phosphate ions were not found                                                                                                                                                                                                                                                                                                                                                                                                                                                                                                                                                                                                                                                                   |
| Three -98 Ions present                 | 1/1          | 7 des-phospho fragment ions were found.                                                                                                                                                                                                                                                                                                                                                                                                                                                                                                                                                                                                                                                                                                              |
| Unique -98 transitions present         | 1/1          | transition b4 to b5-98, transition y3 to y4-98 support unique phosphorylation at position 5 <br/>                                                                                                                                                                                                                                                                                                                                                                                                                                                                                                                                                                                                                                                    |
| Four Sequential b or y ions            | 1/1          | Sequence of four b ions found from b4 to b7-98. Sequence of four y ions found from y1 to y4-98.                                                                                                                                                                                                                                                                                                                                                                                                                                                                                                                                                                                                                                                      |
| Five of six sequential ions present    | 1/1          | Five of Six ions found between b2 and b7<br>Five of Six ions found between y0 and y5<br>Five of Six ions found between y1 and y6<br>Five of Six ions found between y2 and y7<br>Five of Six ions found between y3 and y8                                                                                                                                                                                                                                                                                                                                                                                                                                                                                                                             |
| Proline directed fragmentation pattern | 0/0          |                                                                                                                                                                                                                                                                                                                                                                                                                                                                                                                                                                                                                                                                                                                                                      |
| PhosphoTyrosine transition present     | 0/0          | 0 of 0 phosphotyrosine transitions were found.                                                                                                                                                                                                                                                                                                                                                                                                                                                                                                                                                                                                                                                                                                       |
| Six of top ten ions identified         | 5/6          | ion 1 (mass: 406.7935181: intensity: 12458.8447265625) assigned 2 times<br>ion 2 (mass: 484.5708313: intensity: 8830.79296875) assigned 0 times<br>ion 3 (mass: 435.8968811: intensity: 6582.279296875) assigned 0 times<br>ion 4 (mass: 305.74823: intensity: 5377.1171875) assigned 0 times<br>ion 5 (mass: 475.3937683: intensity: 4747.583984375) assigned 1 times<br>ion 6 (mass: 485.2358398: intensity: 4647.958984375) assigned 0 times<br>ion 7 (mass: 357.7511292: intensity: 4602.5473632813) assigned 2 times<br>ion 8 (mass: 476.2976074: intensity: 4419.6665039063) assigned 0 times<br>ion 9 (mass: 626.2683716: intensity: 3693.0234375) assigned 1 times<br>ion 10 (mass: 812.347168: intensity: 3283.9716796875) assigned 2 times |

### Ion Table

27 ions assigned of 68 ions above threshold (39%).

#### N-terminal ions

| AA | N-ion | b                           | b*      | b-98 | bo                          |
|----|-------|-----------------------------|---------|------|-----------------------------|
| S  | 1     | 88.039                      | 71.013  | -    | 70.029                      |
| S  | 2     | 175.071<br>*175.0774841 (7) | 158.045 | -    | 157.061                     |
| W  | 3     | 361.151                     | 344.124 | -    | 343.140<br>343.1252747 (16) |
| N  | 4     | 475.194                     | 458.167 | -    | 457.183                     |

|   |   |                                                        |                                  |                                                        |         |
|---|---|--------------------------------------------------------|----------------------------------|--------------------------------------------------------|---------|
| - | - | 475.3937683 (38)                                       | 230.1134338 [2+] (3)             | -                                                      | -       |
| s | 5 | 642.192                                                | 625.165                          | 544.206<br>544.215332 (5)                              | 624.181 |
| L | 6 | 755.276                                                | 738.249                          | 657.290<br>657.302002 (12)                             | 737.265 |
| G | 7 | 812.298<br>*406.7935181 [2+] (100)<br>*812.347168 (26) | 795.271<br>*398.356842 [2+] (15) | 714.312<br>*357.7511292 [2+] (36)<br>*714.3624878 (11) | 794.287 |
| R | 8 | -                                                      | -                                | -                                                      | -       |

### C-terminal ions

| AA | C-ion | y                                                      | y*                               | y-98                                                   | yo                               |
|----|-------|--------------------------------------------------------|----------------------------------|--------------------------------------------------------|----------------------------------|
| S  | 8     | -                                                      | -                                | -                                                      | -                                |
| S  | 7     | 899.377<br>450.3572998 [2+] (14)                       | 882.351                          | 801.391<br>401.0996399 [2+] (4)                        | 881.367                          |
| W  | 6     | 812.345<br>*406.7935181 [2+] (100)<br>*812.347168 (26) | 795.319<br>*398.356842 [2+] (15) | 714.359<br>*357.7511292 [2+] (36)<br>*714.3624878 (11) | 794.335                          |
| N  | 5     | 626.266<br>626.2683716 (29)                            | 609.239                          | 528.280<br>265.1610107 [2+] (2)<br>528.3162842 (18)    | 608.255                          |
| s  | 4     | 512.223<br>512.1643066 (14)                            | 495.196<br>*248.1402588 [2+] (6) | 414.237<br>414.3945923 (8)                             | 494.212<br>*248.1402588 [2+] (6) |
| L  | 3     | 345.225<br>345.2528076 (13)                            | 328.198                          | -                                                      | 327.214                          |
| G  | 2     | 232.140<br>232.1189423 (18)                            | 215.114                          | -                                                      | 214.130                          |
| R  | 1     | 175.119<br>*175.0774841 (7)                            | 158.092                          | -                                                      | 157.108                          |

### Ion distribution

| Threshold | Ion count | Matches | % matched |
|-----------|-----------|---------|-----------|
| 0         | 115       | 34      | 29        |
| 0.5       | 106       | 33      | 31        |
| 1         | 95        | 31      | 32        |
| 2         | 68        | 26      | 38        |
| 3         | 60        | 24      | 40        |
| 4         | 49        | 22      | 44        |
| 5         | 43        | 21      | 48        |
| 10        | 24        | 14      | 58        |

### Observed ions > 1%

| m/z         | Intensity       | % max | Assignment (delta)     |
|-------------|-----------------|-------|------------------------|
| 147.0995789 | 257.2797241211, | 2.06  | a2 (0.02)              |
| 159.0934143 | 638.2085571289, | 5.12  | a3*[2+] (0.52)         |
| 169.1227722 | 135.5297393799, | 1.08  |                        |
| 171.0978699 | 143.4731445313, | 1.15  |                        |
| 175.0774841 | 919.4136962891, | 7.37  | b2 (0.00) : y1 (-0.04) |
| 187.0346832 | 398.5091247559, | 3.19  | x3[2+] (-0.07)         |

|             |                   |       |                                                 |
|-------------|-------------------|-------|-------------------------------------------------|
| 199.2028809 | 148.6692504883,   | 1.19  |                                                 |
| 212.1685486 | 191.1918487549,   | 1.53  |                                                 |
| 227.1992188 | 214.4663391113,   | 1.72  |                                                 |
| 230.1134338 | 433.9749755859,   | 3.48  | b4*[2+] (0.52)                                  |
| 232.1189423 | 2259.0187988281,  | 18.13 | y2 (-0.02)                                      |
| 246.0389404 | 669.435546875,    | 5.37  | c4[2+] (-0.57)                                  |
| 248.1402588 | 865.5777587891,   | 6.94  | y4o[2+] (0.52) : y4*[2+] (0.03) : z4[2+] (0.03) |
| 249.2213135 | 244.6913757324,   | 1.96  |                                                 |
| 265.1610107 | 251.730255127,    | 2.02  | y5-98[2+] (0.51)                                |
| 269.5724182 | 126.7447891235,   | 1.01  |                                                 |
| 284.1321411 | 382.0859069824,   | 3.06  |                                                 |
| 294.2586365 | 162.3819885254,   | 1.30  |                                                 |
| 301.2252197 | 459.8869934082,   | 3.69  |                                                 |
| 305.74823   | 5377.1171875,     | 43.15 |                                                 |
| 312.2257385 | 188.3913726807,   | 1.51  | b5o[2+] (-0.36)                                 |
| 343.1252747 | 2090.9584960938,  | 16.78 | b3o (-0.01)                                     |
| 345.2528076 | 1695.9801025391,  | 13.61 | y3 (0.02)                                       |
| 349.3238831 | 734.3971557617,   | 5.89  |                                                 |
| 357.7511292 | 4602.5473632813,  | 36.94 | b7-98[2+] (0.09) : y6-98[2+] (0.06)             |
| 362.3010864 | 542.3225708008,   | 4.35  |                                                 |
| 371.2740173 | 736.467956543,    | 5.91  |                                                 |
| 380.3658142 | 398.1807556152,   | 3.19  |                                                 |
| 386.320282  | 712.1148681641,   | 5.71  | c6[2+] (-0.33)                                  |
| 398.356842  | 1893.2585449219,  | 15.19 | b7*[2+] (0.21) : y6*[2+] (0.19) : z6[2+] (0.19) |
| 400.0909119 | 1347.7126464844,  | 10.81 |                                                 |
| 401.0996399 | 610.5473022461,   | 4.90  | y7-98[2+] (-0.10)                               |
| 406.7935181 | 12458.8447265625, | 100   | b7[2+] (0.14) : y6[2+] (0.11)                   |
| 414.3945923 | 1027.8082275391,  | 8.24  | y4-98 (0.15)                                    |
| 427.0599365 | 1145.2950439453,  | 9.19  |                                                 |
| 432.8696899 | 473.2228088379,   | 3.79  |                                                 |
| 435.8968811 | 6582.279296875,   | 52.83 |                                                 |
| 436.7826538 | 843.9107055664,   | 6.77  |                                                 |
| 438.1077881 | 439.8946533203,   | 3.53  |                                                 |
| 450.3572998 | 1746.1652832031,  | 14.01 | y7[2+] (0.16)                                   |
| 475.3937683 | 4747.583984375,   | 38.10 | b4 (0.19)                                       |
| 476.2976074 | 4419.6665039063,  | 35.47 |                                                 |
| 477.3849487 | 1193.6473388672,  | 9.58  |                                                 |
| 484.5708313 | 8830.79296875,    | 70.87 |                                                 |
| 485.2358398 | 4647.958984375,   | 37.30 |                                                 |
| 485.8580322 | 1065.3843994141,  | 8.55  |                                                 |
| 512.1643066 | 1862.6059570313,  | 14.95 | y4 (-0.05)                                      |
| 513.171814  | 712.4299316406,   | 5.71  |                                                 |
| 519.8786011 | 483.1166687012,   | 3.87  |                                                 |

|             |                  |       |                                     |
|-------------|------------------|-------|-------------------------------------|
| 527.3190918 | 331.7471008301,  | 2.66  |                                     |
| 528.3162842 | 2303.248046875,  | 18.48 | y5-98 (0.03)                        |
| 529.3509521 | 743.3747558594,  | 5.96  |                                     |
| 544.215332  | 737.1232910156,  | 5.91  | b5-98 (0.00)                        |
| 554.4386597 | 350.400390625,   | 2.81  |                                     |
| 555.309082  | 511.6460571289,  | 4.10  |                                     |
| 563.4083252 | 169.4444885254,  | 1.36  |                                     |
| 569.3279419 | 167.7977752686,  | 1.34  |                                     |
| 584.4880371 | 262.096496582,   | 2.10  |                                     |
| 588.5112305 | 304.4399719238,  | 2.44  |                                     |
| 598.9590454 | 670.8488769531,  | 5.38  |                                     |
| 610.3839722 | 1931.7998046875, | 15.50 |                                     |
| 611.3778687 | 618.4312133789,  | 4.96  |                                     |
| 626.2683716 | 3693.0234375,    | 29.64 | y5 (0.00)                           |
| 627.2883301 | 675.3857421875,  | 5.42  |                                     |
| 640.3442993 | 1034.7211914063, | 8.30  |                                     |
| 641.4443359 | 408.5626525879,  | 3.27  |                                     |
| 655.4285278 | 2597.0932617188, | 20.84 |                                     |
| 657.302002  | 1565.8092041016, | 12.56 | b6-98 (0.01)                        |
| 658.3759155 | 381.7488708496,  | 3.06  |                                     |
| 662.0491333 | 494.2594604492,  | 3.96  |                                     |
| 682.4301147 | 205.417175293,   | 1.64  |                                     |
| 683.8948364 | 188.1817321777,  | 1.51  |                                     |
| 688.3411865 | 237.4278717041,  | 1.90  |                                     |
| 696.5302124 | 179.2213745117,  | 1.43  |                                     |
| 697.4085693 | 189.1384735107,  | 1.51  |                                     |
| 702.5229492 | 190.3391876221,  | 1.52  |                                     |
| 714.3624878 | 1453.0158691406, | 11.66 | b7-98 (0.05) : y6-98 (0.00)         |
| 715.4378662 | 614.4329223633,  | 4.93  |                                     |
| 727.6108398 | 166.2453460693,  | 1.33  | a6 (0.32)                           |
| 732.4626465 | 203.5661621094,  | 1.63  |                                     |
| 738.4777832 | 148.0373077393,  | 1.18  | b6* (0.22)                          |
| 743.5636597 | 263.396270752,   | 2.11  |                                     |
| 759.4036865 | 971.048828125,   | 7.79  |                                     |
| 760.4961548 | 228.7962493896,  | 1.83  |                                     |
| 771.5977173 | 231.6029815674,  | 1.85  |                                     |
| 772.4381104 | 207.1053924561,  | 1.66  | c6 (0.13)                           |
| 773.3793945 | 185.2329864502,  | 1.48  |                                     |
| 774.5992432 | 266.2815856934,  | 2.13  |                                     |
| 795.37323   | 148.5834197998,  | 1.19  | b7* (0.10) : y6* (0.05) : z6 (0.05) |
| 799.4356079 | 208.3207702637,  | 1.67  |                                     |
| 803.5025024 | 166.9591827393,  | 1.34  |                                     |
| 812.347168  | 3283.9716796875, | 26.35 | b7 (0.04) : y6 (0.00)               |

|             |                  |       |  |
|-------------|------------------|-------|--|
| 813.3743286 | 1282.9045410156, | 10.29 |  |
| 870.4435425 | 2716.1982421875, | 21.80 |  |
| 871.4953003 | 536.3018798828,  | 4.30  |  |

S1171

and

T1172

# ProPhosSI MS/MS report

Mass: 1065.703491210938 Charge: 4+

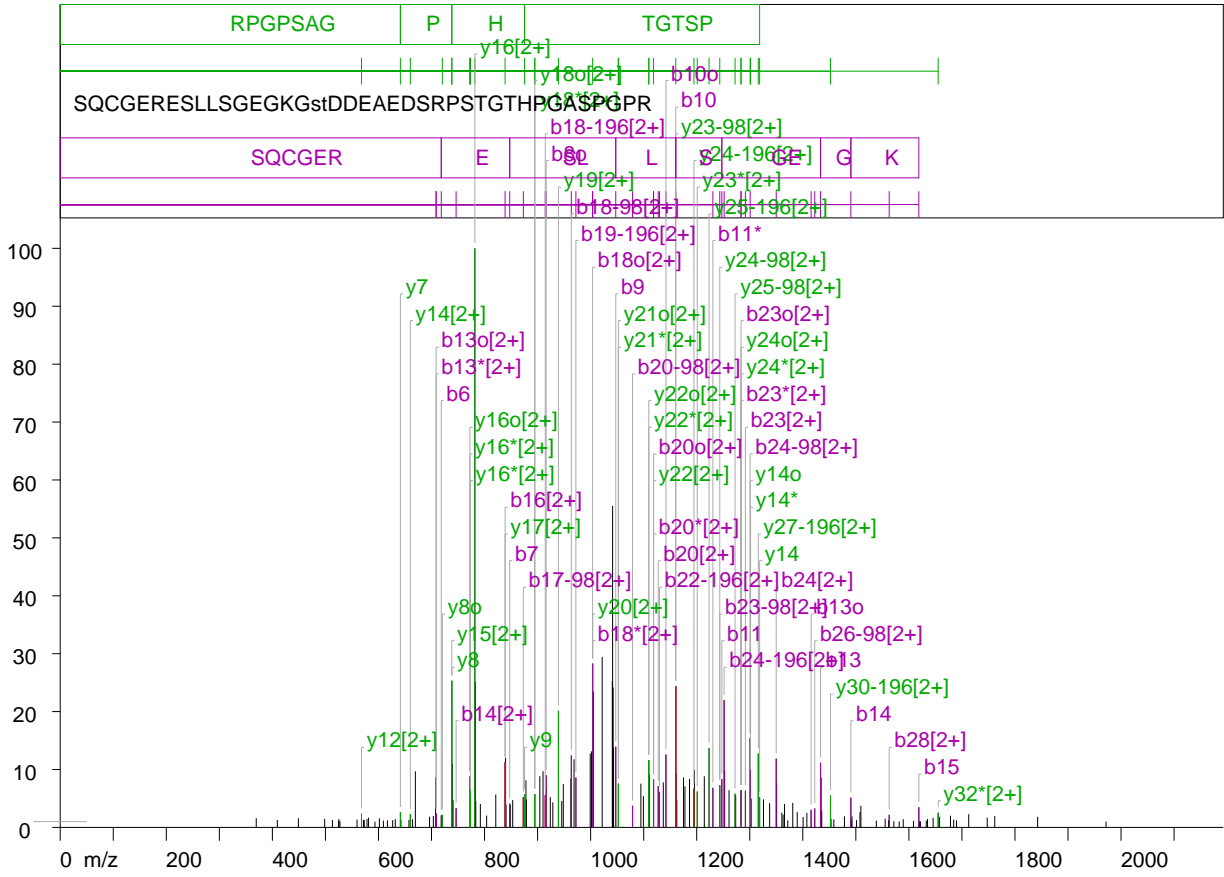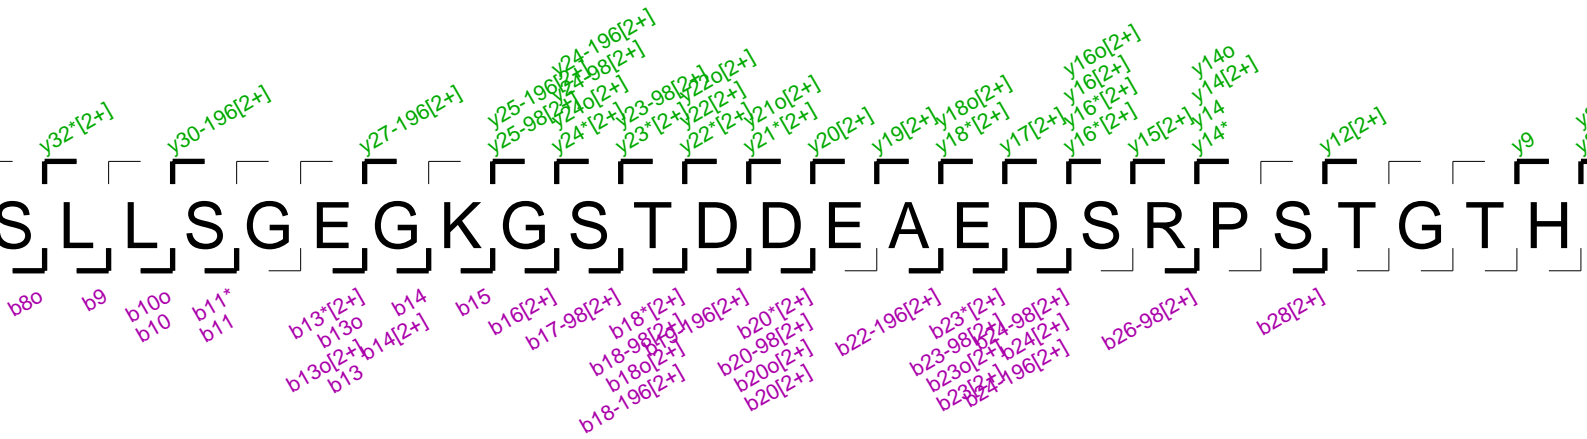

## Cav3.2 Rat

(36) 1155 SQCGERESLLSGEGKGstDDEAEDSRPSTGTHPGASPGPR 1194 4257.754 (1.0281) Da

|                         |     |
|-------------------------|-----|
| Parent Ion              | m/z |
| No parent ions observed |     |

### Modifications and supporting evidence

| Position | Residue ID | Modification | Evidence                   |
|----------|------------|--------------|----------------------------|
| 17       | (1171)     | Phospho (ST) | b16[2+] => b17-98[2+]      |
| 18       | (1172)     | Phospho (ST) | b17-98 [2+]=> b18-196 [2+] |

### Spectrum interpretation

| Rule                                   | passed/tests | Description                                                                                                                                                                                                                                                                                                                                                                                                                                                                                                                                                                                                                                                    |
|----------------------------------------|--------------|----------------------------------------------------------------------------------------------------------------------------------------------------------------------------------------------------------------------------------------------------------------------------------------------------------------------------------------------------------------------------------------------------------------------------------------------------------------------------------------------------------------------------------------------------------------------------------------------------------------------------------------------------------------|
| Parent ions present                    | 0/1          | Parent ions corresponding to the parent fragment - 2 phosphate ions were not found                                                                                                                                                                                                                                                                                                                                                                                                                                                                                                                                                                             |
| Three -98 Ions present                 | 1/1          | 10 des-phospho fragment ions were found.                                                                                                                                                                                                                                                                                                                                                                                                                                                                                                                                                                                                                       |
| Unique -98 transitions present         | 2/2          | transition b16[2+] to b17-98[2+] and b17-98[2+] to b18-196[2+] and y19 to y25-129[2+] support phosphorylation at position 17 and 18<br><br/>                                                                                                                                                                                                                                                                                                                                                                                                                                                                                                                   |
| Four Sequential b or y ions            | 1/1          | Sequence of four b ions found from b13 to b16.<br>Sequence of four y ions found from y14 to y17.                                                                                                                                                                                                                                                                                                                                                                                                                                                                                                                                                               |
| Five of six sequential ions present    | 1/1          | Five of Six ions found between b6 and b11<br>Five of Six ions found between b9 and b14<br>Five of Six ions found between b10 and b15<br>Five of Six ions found between b11 and b16<br>Five of Six ions found between b12 and b17<br>Five of Six ions found between b13 and b18<br>Five of Six ions found between b14 and b19<br>Five of Six ions found between b15 and b20<br>Five of Six ions found between y12 and y17<br>Five of Six ions found between y14 and y19<br>Five of Six ions found between y15 and y20<br>Five of Six ions found between y19 and y24<br>Five of Six ions found between y20 and y25<br>Five of Six ions found between y22 and y27 |
| Proline directed fragmentation pattern | 2/2          | PASS: y14> y13<br/><br>No proline ions at b27-196<br/><br>PASS: y8> y7 with ratio 9.76<br/><br>No proline ions at b33-196<br/><br>NOTE: S-P is a low abundance fragmentation.<br>No proline ions at y4<br>No proline ions at b37-196<br/><br>NOTE: G-P is a low abundance fragmentation.<br>No proline ions at y2<br>No proline ions at b39-196<br/>                                                                                                                                                                                                                                                                                                           |
| PhosphoTyrosine transition present     | 0/0          | 0 of 0 phosphotyrosine transitions were found.                                                                                                                                                                                                                                                                                                                                                                                                                                                                                                                                                                                                                 |
| Six of top ten ions identified         | 5/6          | ion 1 (mass: 781.7017822: intensity: 2547.7536621094) assigned 1 times<br>ion 2 (mass: 1041.457642: intensity: 1414.1689453125) assigned 0 times<br>ion 3 (mass: 1021.797607: intensity: 749.7111816406) assigned 0 times<br>ion 4 (mass: 1003.755981: intensity: 720.337890625) assigned 3 times<br>ion 5 (mass: 738.3172607: intensity: 645.3023681641) assigned 2 times<br>ion 6 (mass: 1040.847046: intensity: 644.5252685547) assigned 0 times<br>ion 7 (mass: 782.4875488: intensity: 639.9045410156) assigned 0 times                                                                                                                                   |



|   |   |                                                                                                                                                                                                                          |
|---|---|--------------------------------------------------------------------------------------------------------------------------------------------------------------------------------------------------------------------------|
| - | - | ion 8 (mass: 1160.515503: intensity: 621.7974853516) assigned 2 times<br>ion 9 (mass: 1042.406982: intensity: 615.7111816406) assigned 0 times<br>ion 10 (mass: 1005.060059: intensity: 598.6134033203) assigned 1 times |
|---|---|--------------------------------------------------------------------------------------------------------------------------------------------------------------------------------------------------------------------------|

## Ion Table

63 ions assigned of 116 ions above threshold (54%).

N-terminal ions

| AA | N-ion | b                                                      | b*                                    | b-196                               | b-98                                 | bo                                                      |
|----|-------|--------------------------------------------------------|---------------------------------------|-------------------------------------|--------------------------------------|---------------------------------------------------------|
| S  | 1     | 88.039                                                 | 71.013                                | -                                   | -                                    | 70.029                                                  |
| Q  | 2     | 216.098                                                | 199.071                               | -                                   | -                                    | 198.087                                                 |
| C  | 3     | 376.129                                                | 359.102                               | -                                   | -                                    | 358.118                                                 |
| G  | 4     | 433.150                                                | 416.124                               | -                                   | -                                    | 415.139                                                 |
| E  | 5     | 562.193                                                | 545.166                               | -                                   | -                                    | 544.182                                                 |
| R  | 6     | 718.294<br>718.4199219 (2)                             | 701.267                               | -                                   | -                                    | 700.283                                                 |
| E  | 7     | 847.336<br>*847.4304199 (4)                            | 830.310                               | -                                   | -                                    | 829.326                                                 |
| S  | 8     | 934.368                                                | 917.342                               | -                                   | -                                    | 916.358<br>916.1751709 (9)                              |
| L  | 9     | 1047.452<br>*1047.380127 (13)                          | 1030.426                              | -                                   | -                                    | 1029.442                                                |
| L  | 10    | 1160.537<br>*1160.515503 (24)                          | 1143.510                              | -                                   | -                                    | 1142.526<br>1141.973389 (12)                            |
| S  | 11    | 1247.569<br>1247.375977 (8)                            | 1230.542<br>1230.474854 (6)           | -                                   | -                                    | 1229.558                                                |
| G  | 12    | 1304.590                                               | 1287.563                              | -                                   | -                                    | 1286.579                                                |
| E  | 13    | 1433.633<br>1433.465942 (11)                           | 1416.606<br>*708.6715088 [2+]<br>(2)  | -                                   | -                                    | 1415.622<br>1415.682007 (3)<br>*708.6715088 [2+]<br>(2) |
| G  | 14    | 1490.654<br>1490.653564 (5)<br>746.3497314 [2+]<br>(3) | 1473.628                              | -                                   | -                                    | 1472.644                                                |
| K  | 15    | 1618.749<br>*1618.772339 (3)                           | 1601.723                              | -                                   | -                                    | 1600.739                                                |
| G  | 16    | 1675.771<br>*838.7264404 [2+]<br>(11)                  | 1658.744                              | -                                   | -                                    | 1657.760                                                |
| s  | 17    | 1842.769                                               | 1825.742                              | -                                   | 1744.783<br>873.1268311 [2+]<br>(5)  | 1824.758                                                |
| t  | 18    | 2023.783                                               | 2006.756<br>*1003.755981 [2+]<br>(28) | 1827.811<br>914.4802246 [2+]<br>(5) | 1925.797<br>963.5715332 [2+]<br>(12) | 2005.772<br>*1003.755981 [2+]<br>(28)                   |
| D  | 19    | 2138.810                                               | 2121.783                              | 1942.838<br>972.1845703 [2+]<br>(8) | 2040.824                             | 2120.799                                                |
| D  | 20    | 2253.837<br>1127.420532 [2+]<br>(7)                    | 2236.810<br>*1118.642212 [2+]<br>(8)  | 2057.865                            | 2155.851<br>*1078.981934 [2+]<br>(3) | 2235.826<br>*1118.642212 [2+]<br>(8)                    |
| E  | 21    | 2382.879                                               | 2365.853                              | 2186.908                            | 2284.893                             | 2364.869                                                |
| A  | 22    | 2453.916                                               | 2436.890                              | 2257.945<br>1129.873169 [2+]<br>(6) | 2355.931                             | 2435.906                                                |
| E  | 23    | 2582.959<br>1291.755859 [2+]<br>(6)                    | 2565.933<br>*1283.499268 [2+]<br>(6)  | 2386.987                            | 2484.973<br>*1243.447998 [2+]<br>(7) | 2564.949<br>*1283.499268 [2+]<br>(6)                    |

|   |    |                                     |          |                                      |                                       |          |
|---|----|-------------------------------------|----------|--------------------------------------|---------------------------------------|----------|
| D | 24 | 2697.986<br>1349.87207 [2+]<br>(11) | 2680.959 | 2502.014<br>1251.695801 [2+]<br>(21) | 2600.000<br>*1300.744385 [2+]<br>(15) | 2679.975 |
| S | 25 | 2785.018                            | 2767.992 | 2589.046                             | 2687.032                              | 2767.008 |
| R | 26 | 2941.119                            | 2924.093 | 2745.147                             | 2843.133<br>1422.529785 [2+]<br>(3)   | 2923.109 |
| P | 27 | 3038.172                            | 3021.145 | 2842.200                             | 2940.186                              | 3020.161 |
| S | 28 | 3125.204<br>1562.933838 [2+]<br>(2) | 3108.177 | 2929.232                             | 3027.218                              | 3107.193 |
| T | 29 | 3226.252                            | 3209.225 | 3030.280                             | 3128.266                              | 3208.241 |
| G | 30 | 3283.273                            | 3266.247 | 3087.301                             | 3185.287                              | 3265.263 |
| T | 31 | 3384.321                            | 3367.294 | 3188.349                             | 3286.335                              | 3366.310 |
| H | 32 | 3521.380                            | 3504.353 | 3325.408                             | 3423.394                              | 3503.369 |
| P | 33 | 3618.432                            | 3601.406 | 3422.461                             | 3520.447                              | 3600.422 |
| G | 34 | 3675.454                            | 3658.427 | 3479.482                             | 3577.468                              | 3657.443 |
| A | 35 | 3746.491                            | 3729.465 | 3550.519                             | 3648.505                              | 3728.481 |
| S | 36 | 3833.523                            | 3816.497 | 3637.551                             | 3735.537                              | 3815.513 |
| P | 37 | 3930.576                            | 3913.549 | 3734.604                             | 3832.590                              | 3912.565 |
| G | 38 | 3987.597                            | 3970.571 | 3791.626                             | 3889.611                              | 3969.587 |
| P | 39 | 4084.650                            | 4067.624 | 3888.678                             | 3986.664                              | 4066.640 |
| R | 40 | -                                   | -        | -                                    | -                                     | -        |

### C-terminal ions

| AA | C-ion | y        | y*                                   | y-196                                 | y-98                                 | yo                                   |
|----|-------|----------|--------------------------------------|---------------------------------------|--------------------------------------|--------------------------------------|
| S  | 40    | -        | -                                    | -                                     | -                                    | -                                    |
| Q  | 39    | 4171.730 | 4154.703                             | 3975.758                              | 4073.744                             | 4153.719                             |
| C  | 38    | 4043.671 | 4026.645                             | 3847.699                              | 3945.685                             | 4025.661                             |
| G  | 37    | 3883.641 | 3866.614                             | 3687.669                              | 3785.655                             | 3865.630                             |
| E  | 36    | 3826.619 | 3809.593                             | 3630.647                              | 3728.633                             | 3808.609                             |
| R  | 35    | 3697.576 | 3680.550                             | 3501.605                              | 3599.591                             | 3679.566                             |
| E  | 34    | 3541.475 | 3524.449                             | 3345.504                              | 3443.489                             | 3523.465                             |
| S  | 33    | 3412.433 | 3395.406                             | 3216.461                              | 3314.447                             | 3394.422                             |
| L  | 32    | 3325.401 | 3308.374<br>*1655.234497 [2+]<br>(2) | 3129.429                              | 3227.415                             | 3307.390                             |
| L  | 31    | 3212.317 | 3195.290                             | 3016.345                              | 3114.331                             | 3194.306                             |
| S  | 30    | 3099.233 | 3082.206                             | 2903.261<br>1452.163208 [2+]<br>(5)   | 3001.247                             | 3081.222                             |
| G  | 29    | 3012.201 | 2995.174                             | 2816.229                              | 2914.215                             | 2994.190                             |
| E  | 28    | 2955.179 | 2938.153                             | 2759.207                              | 2857.193                             | 2937.169                             |
| G  | 27    | 2826.136 | 2809.110                             | 2630.165<br>1316.102661 [2+]<br>(12)  | 2728.151                             | 2808.126                             |
| K  | 26    | 2769.115 | 2752.088                             | 2573.143                              | 2671.129                             | 2751.104                             |
| G  | 25    | 2641.020 | 2623.994                             | 2445.048<br>*1223.272827 [2+]<br>(13) | 2543.034<br>1272.28186 [2+] (5)      | 2623.009                             |
| s  | 24    | 2583.999 | 2566.972<br>*1283.499268 [2+]<br>(6) | 2388.027<br>1194.777588 [2+]<br>(6)   | 2486.013<br>*1243.447998 [2+]<br>(7) | 2565.988<br>*1283.499268 [2+]<br>(6) |

|   |    |                                                        |                                                                  |   |                                       |                                       |
|---|----|--------------------------------------------------------|------------------------------------------------------------------|---|---------------------------------------|---------------------------------------|
| t | 23 | 2417.000                                               | 2399.974<br>*1200.97229 [2+]<br>(6)                              | - | 2319.014<br>*1160.515503 [2+]<br>(24) | 2398.990                              |
| D | 22 | 2235.986<br>*1118.642212 [2+]<br>(8)                   | 2218.960<br>*1109.654907 [2+]<br>(11)                            | - | -                                     | 2217.976<br>*1109.654907 [2+]<br>(11) |
| D | 21 | 2120.959                                               | 2103.933<br>*1052.285889 [2+]<br>(7)                             | - | -                                     | 2102.949<br>*1052.285889 [2+]<br>(7)  |
| E | 20 | 2005.932<br>*1003.755981 [2+]<br>(28)                  | 1988.906                                                         | - | -                                     | 1987.922                              |
| A | 19 | 1876.890<br>939.2346191 [2+]<br>(20)                   | 1859.863                                                         | - | -                                     | 1858.879                              |
| E | 18 | 1805.853                                               | 1788.826<br>*894.7489014 [2+]<br>(5)                             | - | -                                     | 1787.842<br>*894.7489014 [2+]<br>(5)  |
| D | 17 | 1676.810<br>*838.7264404 [2+]<br>(11)                  | 1659.784                                                         | - | -                                     | 1658.799                              |
| S | 16 | 1561.783<br>781.7017822 [2+]<br>(100)                  | 1544.757<br>*772.4224854 [2+]<br>(8)<br>*773.4775391 [2+]<br>(5) | - | -                                     | 1543.773<br>*772.4224854 [2+]<br>(8)  |
| R | 15 | 1474.751<br>*738.3172607 [2+]<br>(25)                  | 1457.725                                                         | - | -                                     | 1456.741                              |
| P | 14 | 1318.650<br>1318.614624 (5)<br>660.0480347 [2+]<br>(2) | 1301.623<br>*1301.525391 (9)                                     | - | -                                     | 1300.639<br>*1300.744385 (15)         |
| S | 13 | 1221.597                                               | 1204.571                                                         | - | -                                     | 1203.587                              |
| T | 12 | 1134.565<br>568.0300293 [2+]<br>(2)                    | 1117.539                                                         | - | -                                     | 1116.555                              |
| G | 11 | 1033.517                                               | 1016.491                                                         | - | -                                     | 1015.507                              |
| T | 10 | 976.496                                                | 959.469                                                          | - | -                                     | 958.485                               |
| H | 9  | 875.448<br>875.4642334 (5)                             | 858.422                                                          | - | -                                     | 857.438                               |
| P | 8  | 738.389<br>*738.3172607 (25)                           | 721.363                                                          | - | -                                     | 720.379<br>720.3886719 (2)            |
| G | 7  | 641.337<br>641.3174438 (2)                             | 624.310                                                          | - | -                                     | 623.326                               |
| A | 6  | 584.315                                                | 567.289                                                          | - | -                                     | 566.305                               |
| S | 5  | 513.278                                                | 496.252                                                          | - | -                                     | 495.267                               |
| P | 4  | 426.246                                                | 409.219                                                          | - | -                                     | 408.235                               |
| G | 3  | 329.193                                                | 312.167                                                          | - | -                                     | 311.183                               |
| P | 2  | 272.172                                                | 255.145                                                          | - | -                                     | 254.161                               |
| R | 1  | 175.119                                                | 158.092                                                          | - | -                                     | 157.108                               |

## Ion distribution

| Threshold | Ion count | Matches | % matched |
|-----------|-----------|---------|-----------|
| 0         | 216       | 106     | 49        |
| 0.5       | 196       | 101     | 51        |
| 1         | 165       | 87      | 52        |
| 2         | 116       | 63      | 54        |
| 3         | 99        | 53      | 53        |

|    |    |    |    |
|----|----|----|----|
| 4  | 91 | 48 | 52 |
| 5  | 77 | 45 | 58 |
| 10 | 29 | 19 | 65 |

### Observed ions > 1%

| m/z         | Intensity      | % max | Assignment (delta)                                    |
|-------------|----------------|-------|-------------------------------------------------------|
| 369.5786743 | 40.9881706238  | 1.60  | y8[2+] (-0.12)                                        |
| 409.2619629 | 32.7162437439  | 1.28  | y4* (0.04) : z4 (0.04)                                |
| 449.0072021 | 40.2975616455  | 1.58  |                                                       |
| 498.5693359 | 37.8617553711  | 1.48  |                                                       |
| 513.2210083 | 32.7649307251  | 1.28  | y5 (-0.05)                                            |
| 524.6817017 | 28.8605270386  | 1.13  | b9[2+] (0.45)                                         |
| 525.4283447 | 36.7389602661  | 1.44  |                                                       |
| 527.3870239 | 27.0132312775  | 1.06  |                                                       |
| 559.5700684 | 34.5832672119  | 1.35  | y12*[2+] (0.29) : z12[2+] (0.29)                      |
| 568.0300293 | 60.6096687317  | 2.37  | y12[2+] (0.24)                                        |
| 571.6634521 | 32.0772285461  | 1.25  | b10o[2+] (-0.10) : b10*[2+] (-0.59)                   |
| 573.2207642 | 33.2130661011  | 1.30  |                                                       |
| 578.3764648 | 37.2161750793  | 1.46  |                                                       |
| 581.2559814 | 42.7211494446  | 1.67  | b10[2+] (0.48) : x12[2+] (-0.52)                      |
| 601.7198486 | 40.0570755005  | 1.57  | a11o[2+] (0.43) : a11*[2+] (-0.05) : y13o[2+] (-0.57) |
| 609.2756958 | 29.962266922   | 1.17  |                                                       |
| 616.8734131 | 31.0524044037  | 1.21  |                                                       |
| 626.7789917 | 31.7071266174  | 1.24  |                                                       |
| 631.6966553 | 36.1863327026  | 1.42  |                                                       |
| 641.3174438 | 66.1032867432  | 2.59  | y7 (-0.01)                                            |
| 642.361084  | 33.937412262   | 1.33  |                                                       |
| 657.4611206 | 33.078125      | 1.29  |                                                       |
| 660.0480347 | 58.1442375183  | 2.28  | y14[2+] (0.21)                                        |
| 664.3019409 | 35.6975250244  | 1.40  |                                                       |
| 669.553894  | 246.5953521729 | 9.67  | x7 (0.22)                                             |
| 696.3787842 | 47.0728149414  | 1.84  |                                                       |
| 703.4810791 | 50.3269958496  | 1.97  | a13[2+] (0.15)                                        |
| 707.708252  | 219.7680664063 | 8.62  |                                                       |
| 708.6715088 | 60.9536743164  | 2.39  | b13o[2+] (0.35) : b13*[2+] (-0.13)                    |
| 718.4199219 | 53.0172653198  | 2.08  | b6 (0.12)                                             |
| 720.3886719 | 55.161819458   | 2.16  | y8o (0.00)                                            |
| 738.3172607 | 645.3023681641 | 25.32 | y15[2+] (0.43) : y8 (-0.07)                           |
| 739.3377686 | 280.0038757324 | 10.99 |                                                       |
| 740.5473633 | 120.1382369995 | 4.71  |                                                       |
| 746.3497314 | 84.2375411987  | 3.30  | b14[2+] (0.51)                                        |
| 772.4224854 | 223.8941650391 | 8.78  | y16o[2+] (0.03) : y16*[2+] (-0.45) : z16[2+] (-0.45)  |

|             |                 |       |                                                      |
|-------------|-----------------|-------|------------------------------------------------------|
| 773.4775391 | 144.1331939697  | 5.65  | y16*[2+] (0.59) : z16[2+] (0.59)                     |
| 781.7017822 | 2547.7536621094 | 100   | y16[2+] (0.30)                                       |
| 782.4875488 | 639.9045410156  | 25.11 |                                                      |
| 783.4559326 | 116.0588302612  | 4.55  |                                                      |
| 792.0401611 | 103.0770568848  | 4.04  |                                                      |
| 803.9417725 | 51.997543335    | 2.04  |                                                      |
| 821.1912842 | 144.7623596191  | 5.68  |                                                      |
| 838.7264404 | 286.5685424805  | 11.24 | b16[2+] (0.33) : y17[2+] (-0.18)                     |
| 839.6625977 | 306.5713500977  | 12.03 |                                                      |
| 840.498291  | 100.2888793945  | 3.93  |                                                      |
| 847.4304199 | 104.8400878906  | 4.11  | c16[2+] (0.52) : b7 (0.09)                           |
| 848.4138184 | 99.2198181152   | 3.89  |                                                      |
| 853.0695801 | 120.0179367065  | 4.71  | x17[2+] (0.16)                                       |
| 873.1268311 | 133.6125335693  | 5.24  | b17-98[2+] (0.23)                                    |
| 875.4642334 | 145.1261291504  | 5.69  | y9 (0.01)                                            |
| 878.0611572 | 207.0948486328  | 8.12  |                                                      |
| 878.8703613 | 123.0524978638  | 4.82  |                                                      |
| 894.7489014 | 146.3314361572  | 5.74  | y18o[2+] (0.32) : y18*[2+] (-0.16) : z18[2+] (-0.16) |
| 904.1644287 | 225.3229827881  | 8.84  |                                                      |
| 910.223877  | 247.1717529297  | 9.70  |                                                      |
| 914.4802246 | 141.8918304443  | 5.56  | b18-196[2+] (0.07)                                   |
| 916.1751709 | 229.3947143555  | 9.00  | b8o (-0.18)                                          |
| 923.9431152 | 133.2186126709  | 5.22  |                                                      |
| 928.6784668 | 110.3372650146  | 4.33  |                                                      |
| 939.2346191 | 513.0369873047  | 20.13 | y19[2+] (0.28)                                       |
| 945.5325928 | 115.9976577759  | 4.55  |                                                      |
| 948.4741211 | 191.0686035156  | 7.49  |                                                      |
| 962.7911377 | 214.7091217041  | 8.42  |                                                      |
| 963.5715332 | 316.8715820313  | 12.43 | b18-98[2+] (0.16)                                    |
| 968.729126  | 299.7107543945  | 11.76 |                                                      |
| 972.1845703 | 219.2107696533  | 8.60  | b19-196[2+] (0.26)                                   |
| 999.1816406 | 324.4798278809  | 12.73 |                                                      |
| 1001.525757 | 334.6721801758  | 13.13 | a9o (0.07)                                           |
| 1002.26001  | 322.1967773438  | 12.64 | a9* (-0.17)                                          |
| 1003.755981 | 720.337890625   | 28.27 | b18o[2+] (0.36) : y20[2+] (0.28) : b18*[2+] (-0.12)  |
| 1005.060059 | 598.6134033203  | 23.49 | x10 (0.56)                                           |
| 1021.797607 | 749.7111816406  | 29.42 |                                                      |
| 1040.847046 | 644.5252685547  | 25.29 |                                                      |
| 1041.457642 | 1414.1689453125 | 55.50 |                                                      |
| 1042.406982 | 615.7111816406  | 24.16 |                                                      |
| 1043.263428 | 351.5051574707  | 13.79 |                                                      |
| 1047.380127 | 354.974029541   | 13.93 | a19o[2+] (0.47) : a19*[2+] (-0.01) : b9 (-0.07)      |
| 1052.285889 | 192.438079834   | 7.55  | y21o[2+] (0.30) : y21*[2+] (-0.18) : z21[2+] (-0.18) |

|             |                |       |                                                                                          |
|-------------|----------------|-------|------------------------------------------------------------------------------------------|
| 1078.981934 | 95.3422698975  | 3.74  | c19[2+] (0.55) : b20-98[2+] (0.55)                                                       |
| 1094.756348 | 192.6252441406 | 7.56  |                                                                                          |
| 1099.461792 | 137.4661407471 | 5.39  |                                                                                          |
| 1109.654907 | 296.0208129883 | 11.61 | y22o[2+] (0.16) : y22*[2+] (-0.32) : z22[2+] (-0.32)                                     |
| 1110.669067 | 232.6377563477 | 9.13  |                                                                                          |
| 1118.642212 | 210.5420684814 | 8.26  | b20o[2+] (0.22) : y22[2+] (0.14) : b20*[2+] (-0.26)                                      |
| 1127.420532 | 181.510055542  | 7.12  | b20[2+] (-0.00)                                                                          |
| 1129.873169 | 156.092086792  | 6.12  | b22-196[2+] (0.39)                                                                       |
| 1136.977783 | 198.1386260986 | 7.77  |                                                                                          |
| 1141.973389 | 320.2872924805 | 12.57 | b10o (-0.55)                                                                             |
| 1160.515503 | 621.7974853516 | 24.40 | y23-98[2+] (0.50) : b10 (-0.02)                                                          |
| 1161.433838 | 238.0904846191 | 9.34  |                                                                                          |
| 1162.466553 | 119.3053512573 | 4.68  | x12 (-0.09)                                                                              |
| 1175.10022  | 219.8173522949 | 8.62  |                                                                                          |
| 1177.793457 | 180.795135498  | 7.09  | c10 (0.22) : a21[2+] (-0.15)                                                             |
| 1186.449341 | 212.7387695313 | 8.35  |                                                                                          |
| 1194.777588 | 170.2385864258 | 6.68  | y24-196[2+] (0.26)                                                                       |
| 1195.66626  | 252.8531951904 | 9.92  |                                                                                          |
| 1200.97229  | 157.5673217773 | 6.18  | c21[2+] (0.51) : y23*[2+] (0.48) : z23[2+] (0.48) : a11o (-0.59)                         |
| 1214.317627 | 224.8681030273 | 8.82  |                                                                                          |
| 1223.272827 | 349.6664123535 | 13.72 | x23[2+] (0.27) : y25-196[2+] (0.24)                                                      |
| 1230.474854 | 174.1553344727 | 6.83  | b11* (-0.06)                                                                             |
| 1243.447998 | 185.272567749  | 7.27  | b23-98[2+] (0.45) : y24-98[2+] (-0.06)                                                   |
| 1247.375977 | 212.9717712402 | 8.35  | b11 (-0.19)                                                                              |
| 1251.695801 | 560.0598144531 | 21.98 | b24-196[2+] (0.18)                                                                       |
| 1252.640869 | 250.5209960938 | 9.83  |                                                                                          |
| 1260.957886 | 163.9123077393 | 6.43  |                                                                                          |
| 1272.28186  | 148.0717773438 | 5.81  | y25-98[2+] (0.26)                                                                        |
| 1273.508179 | 140.5074462891 | 5.51  |                                                                                          |
| 1283.499268 | 163.2189025879 | 6.40  | b23o[2+] (0.52) : b23*[2+] (0.02) : y24o[2+] (0.00) : y24*[2+] (-0.49) : z24[2+] (-0.49) |
| 1291.755859 | 161.1047668457 | 6.32  | b23[2+] (-0.22)                                                                          |
| 1300.744385 | 392.5232543945 | 15.40 | c23[2+] (0.24) : b24-98[2+] (0.24) : y14o (0.10)                                         |
| 1301.525391 | 230.7246246338 | 9.05  | y14* (-0.09) : z14 (-0.09)                                                               |
| 1302.62207  | 126.2678909302 | 4.95  |                                                                                          |
| 1316.102661 | 325.1898193359 | 12.76 | y27-196[2+] (0.51)                                                                       |
| 1318.614624 | 132.799331665  | 5.21  | y14 (-0.03)                                                                              |
| 1325.862427 | 123.3242263794 | 4.84  |                                                                                          |
| 1337.492188 | 106.5239181519 | 4.18  |                                                                                          |
| 1349.87207  | 302.6125488281 | 11.87 | b24[2+] (0.37)                                                                           |
| 1350.634155 | 194.831237793  | 7.64  |                                                                                          |
| 1360.494019 | 65.0113601685  | 2.55  |                                                                                          |
| 1362.867065 | 56.3522758484  | 2.21  |                                                                                          |

|             |                 |       |                                  |
|-------------|-----------------|-------|----------------------------------|
| 1365.552856 | 103.0005569458, | 4.04  |                                  |
| 1371.669189 | 30.6346092224,  | 1.20  |                                  |
| 1381.07019  | 108.0031356812, | 4.23  |                                  |
| 1389.536865 | 67.1143951416,  | 2.63  |                                  |
| 1400.599731 | 46.0018730164,  | 1.80  |                                  |
| 1407.653931 | 63.8105545044,  | 2.50  |                                  |
| 1415.682007 | 77.4356536865,  | 3.03  | b13o (0.05)                      |
| 1422.529785 | 83.1922454834,  | 3.26  | b26-98[2+] (0.45)                |
| 1433.465942 | 284.8766784668, | 11.18 | b13 (-0.16)                      |
| 1434.525024 | 219.0742797852, | 8.59  |                                  |
| 1435.712891 | 73.7855987549,  | 2.89  |                                  |
| 1452.163208 | 139.9197540283, | 5.49  | y30-196[2+] (0.02)               |
| 1453.214722 | 37.5549621582,  | 1.47  |                                  |
| 1458.548096 | 34.9031639099,  | 1.36  |                                  |
| 1478.536011 | 48.6388053894,  | 1.90  | y28[2+] (0.44)                   |
| 1490.653564 | 131.0817718506, | 5.14  | b14 (-0.00)                      |
| 1491.598755 | 31.4389381409,  | 1.23  | x28[2+] (-0.49)                  |
| 1492.806885 | 48.0659942627,  | 1.88  |                                  |
| 1501.280273 | 31.5720787048,  | 1.23  | y30-98[2+] (0.15)                |
| 1507.776123 | 67.4335632324,  | 2.64  | c14 (0.09)                       |
| 1509.564575 | 95.3370819092,  | 3.74  |                                  |
| 1538.632202 | 30.1083297729,  | 1.18  |                                  |
| 1555.28772  | 38.2129669189,  | 1.49  |                                  |
| 1561.705444 | 31.0874271393,  | 1.22  | y16 (-0.07)                      |
| 1562.933838 | 55.6504592896,  | 2.18  | b28[2+] (-0.17)                  |
| 1571.636475 | 26.8515911102,  | 1.05  | c28[2+] (0.01)                   |
| 1581.78125  | 26.2612075806,  | 1.03  |                                  |
| 1589.352539 | 36.1042366028,  | 1.41  | x16 (-0.42)                      |
| 1608.740967 | 29.0482902527,  | 1.14  | y33-196[2+] (0.00)               |
| 1618.772339 | 88.4985733032,  | 3.47  | b15 (0.02) : a30o[2+] (-0.36)    |
| 1619.77417  | 26.9517936707,  | 1.05  | a30*[2+] (0.14)                  |
| 1621.759888 | 26.4497566223,  | 1.03  | c29[2+] (-0.38)                  |
| 1632.734497 | 29.9403190613,  | 1.17  | b30o[2+] (-0.40)                 |
| 1635.066528 | 36.866355896,   | 1.44  |                                  |
| 1645.69519  | 42.0781288147,  | 1.65  |                                  |
| 1655.234497 | 64.8339538574,  | 2.54  | y32*[2+] (0.54) : z32[2+] (0.54) |
| 1657.906616 | 46.9041595459,  | 1.84  | y33-98[2+] (0.17) : b16o (0.14)  |
| 1678.418213 | 51.3854598999,  | 2.01  | a31[2+] (-0.24)                  |
| 1684.463867 | 34.5307846069,  | 1.35  | b31*[2+] (0.31)                  |
| 1689.726563 | 31.3115634918,  | 1.22  |                                  |
| 1712.81958  | 57.9543457031,  | 2.27  |                                  |
| 1747.689453 | 42.9053344727,  | 1.68  | a32[2+] (0.49)                   |
| 1761.922485 | 50.0779037476,  | 1.96  | y34o[2+] (-0.31)                 |

|             |                |      |             |
|-------------|----------------|------|-------------|
| 1842.729614 | 46.6401023865, | 1.83 | b17 (-0.03) |
|-------------|----------------|------|-------------|



**S1203**

# ProPhosSI MS/MS report

Mass: 760.869295 Charge: 2+

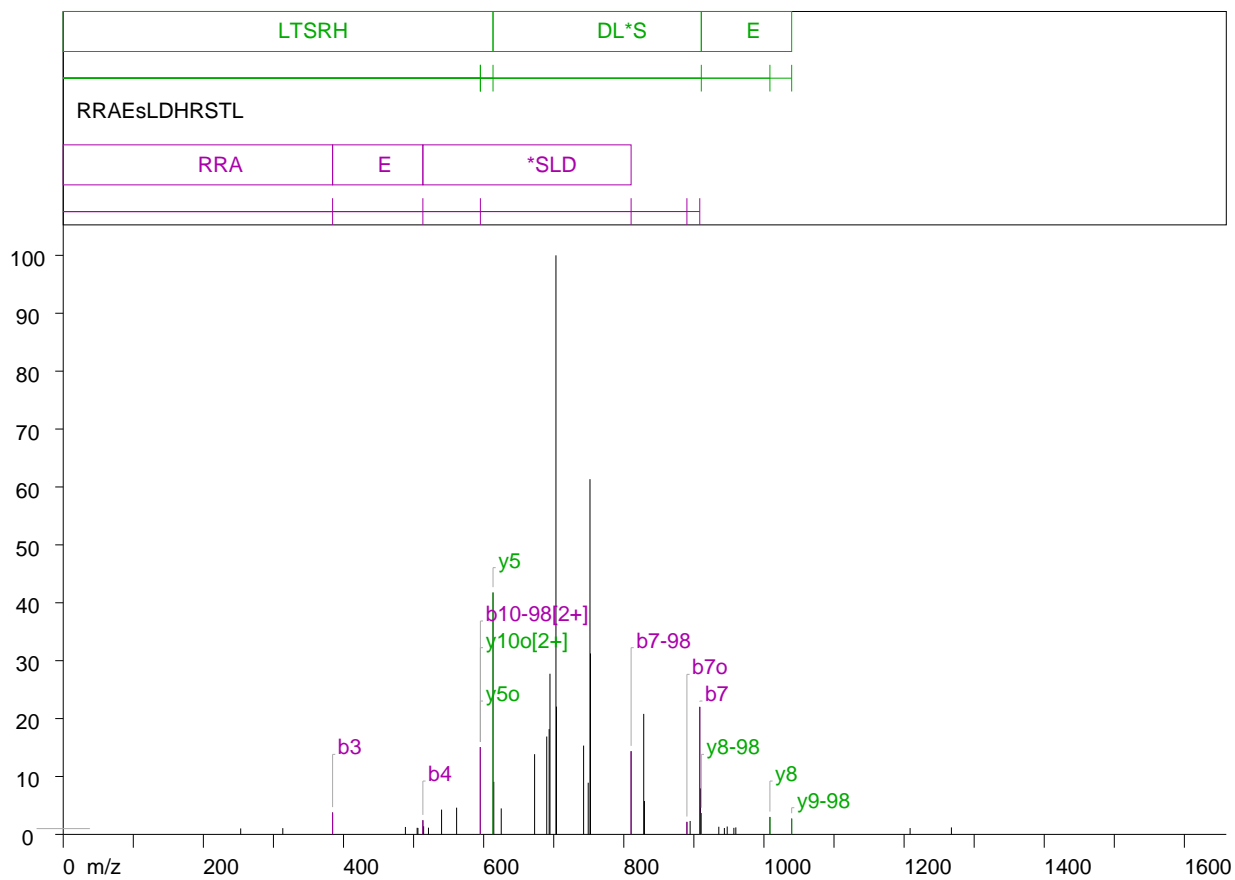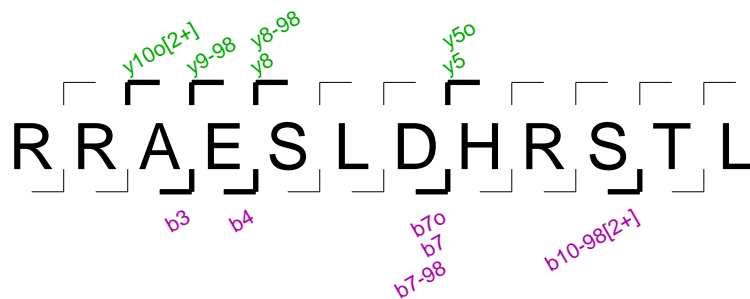

## Cav3.2 Rat

(23) 1199 RRAEsLDHRSTL 1210 1519.725 (-0.0027) Da

|                         |     |
|-------------------------|-----|
| Parent Ion              | m/z |
| No parent ions observed |     |

## Modifications and supporting evidence

| Position | Residue ID | Modification | Evidence             |
|----------|------------|--------------|----------------------|
| 5        | (1203)     | Phospho (ST) | b4=>b7-98; y5=>y9-98 |

## Spectrum interpretation

| Rule                                   | passed/tests | Description                                                                                                                                                                                                                                                                                                                                                                                                                                                                                                                                                                                                                                  |
|----------------------------------------|--------------|----------------------------------------------------------------------------------------------------------------------------------------------------------------------------------------------------------------------------------------------------------------------------------------------------------------------------------------------------------------------------------------------------------------------------------------------------------------------------------------------------------------------------------------------------------------------------------------------------------------------------------------------|
| Parent ions present                    | 0/1          | Parent ions corresponding to the parent fragment - 1 phosphate ions were not found                                                                                                                                                                                                                                                                                                                                                                                                                                                                                                                                                           |
| Three -98 Ions present                 | 1/1          | 4 des-phospho fragment ions were found.                                                                                                                                                                                                                                                                                                                                                                                                                                                                                                                                                                                                      |
| Unique -98 transitions present         | 1/1          | transition b4 to b7-98, transition y5 to y9-98 support unique phosphorylation at position 5 <br/>                                                                                                                                                                                                                                                                                                                                                                                                                                                                                                                                            |
| Four Sequential b or y ions            | 0/1          | Sequence of four y or b ions not observed                                                                                                                                                                                                                                                                                                                                                                                                                                                                                                                                                                                                    |
| Five of six sequential ions present    | 0/1          |                                                                                                                                                                                                                                                                                                                                                                                                                                                                                                                                                                                                                                              |
| Proline directed fragmentation pattern | 0/0          |                                                                                                                                                                                                                                                                                                                                                                                                                                                                                                                                                                                                                                              |
| PhosphoTyrosine transition present     | 0/0          | 0 of 0 phosphotyrosine transitions were found.                                                                                                                                                                                                                                                                                                                                                                                                                                                                                                                                                                                               |
| Six of top ten ions identified         | 3/6          | ion 1 (mass: 703.152: intensity: 30231.90) assigned 0 times<br>ion 2 (mass: 751.717: intensity: 18545.61) assigned 0 times<br>ion 3 (mass: 613.351: intensity: 12628.94) assigned 1 times<br>ion 4 (mass: 752.457: intensity: 9447.16) assigned 0 times<br>ion 5 (mass: 694.642: intensity: 8388.25) assigned 0 times<br>ion 6 (mass: 703.922: intensity: 6672.20) assigned 1 times<br>ion 7 (mass: 908.422: intensity: 6658.14) assigned 1 times<br>ion 8 (mass: 828.425: intensity: 6292.09) assigned 0 times<br>ion 9 (mass: 693.462: intensity: 5496.28) assigned 0 times<br>ion 10 (mass: 690.022: intensity: 5109.98) assigned 0 times |

## Ion Table

12 ions assigned of 28 ions above threshold (42%).

### N-terminal ions

| AA | N-ion | b                      | b*      | b-98    | bo      |
|----|-------|------------------------|---------|---------|---------|
| R  | 1     | 157.108                | 140.082 | -       | 139.098 |
| R  | 2     | 313.210                | 296.183 | -       | 295.199 |
| A  | 3     | 384.247<br>384.397 (3) | 367.220 | -       | 366.236 |
| E  | 4     | 513.289<br>513.252 (2) | 496.263 | -       | 495.279 |
| s  | 5     | 680.288                | 663.261 | 582.302 | 662.277 |
| L  | 6     | 793.372                | 776.345 | 695.386 | 775.361 |

|   |    |                         |          |                                |                        |
|---|----|-------------------------|----------|--------------------------------|------------------------|
| D | 7  | 908.399<br>908.422 (22) | 891.372  | 810.413<br>*810.431 (14)       | 890.388<br>890.065 (2) |
| H | 8  | 1045.458                | 1028.431 | 947.472                        | 1027.447               |
| R | 9  | 1201.559                | 1184.532 | 1103.573                       | 1183.548               |
| S | 10 | 1288.591                | 1271.564 | 1190.605<br>*595.337 [2+] (15) | 1270.580               |
| T | 11 | 1389.638                | 1372.612 | 1291.652                       | 1371.628               |
| L | 12 | -                       | -        | -                              | -                      |

### C-terminal ions

| AA | C-ion | y                        | y*       | y-98                     | yo                             |
|----|-------|--------------------------|----------|--------------------------|--------------------------------|
| R  | 12    | -                        | -        | -                        | -                              |
| R  | 11    | 1364.632                 | 1347.605 | 1266.646                 | 1346.621                       |
| A  | 10    | 1208.531                 | 1191.504 | 1110.545                 | 1190.520<br>*595.337 [2+] (15) |
| E  | 9     | 1137.494                 | 1120.467 | 1039.508<br>1039.561 (2) | 1119.483                       |
| s  | 8     | 1008.451<br>1008.534 (3) | 991.425  | 910.465<br>910.605 (3)   | 990.440                        |
| L  | 7     | 841.453                  | 824.426  | -                        | 823.442                        |
| D  | 6     | 728.369                  | 711.342  | -                        | 710.358                        |
| H  | 5     | 613.342<br>613.351 (41)  | 596.315  | -                        | 595.331<br>*595.337 (15)       |
| R  | 4     | 476.283                  | 459.256  | -                        | 458.272                        |
| S  | 3     | 320.182                  | 303.155  | -                        | 302.171                        |
| T  | 2     | 233.150                  | 216.123  | -                        | 215.139                        |
| L  | 1     | 132.102                  | 115.075  | -                        | 114.091                        |

### Ion distribution

| Threshold | Ion count | Matches | % matched |
|-----------|-----------|---------|-----------|
| 0         | 73        | 21      | 28        |
| 0.5       | 60        | 20      | 33        |
| 1         | 42        | 17      | 40        |
| 2         | 28        | 12      | 42        |
| 3         | 24        | 9       | 37        |
| 4         | 21        | 6       | 28        |
| 5         | 18        | 6       | 33        |
| 10        | 14        | 6       | 42        |

### Observed ions > 1%

| m/z     | Intensity            | % max | Assignment (delta) |
|---------|----------------------|-------|--------------------|
| 253.265 | 311.63 <sub>1</sub>  | 1.03  |                    |
| 313.338 | 327.05 <sub>1</sub>  | 1.08  | b2 (0.12)          |
| 384.397 | 1144.73 <sub>1</sub> | 3.78  | b3 (0.14)          |
| 488.340 | 388.02 <sub>1</sub>  | 1.28  |                    |
| 505.085 | 344.47 <sub>1</sub>  | 1.13  | y8[2+] (0.35)      |

|          |           |       |                                                    |
|----------|-----------|-------|----------------------------------------------------|
| 506.190  | 337.26,   | 1.11  |                                                    |
| 513.252  | 739.34,   | 2.44  | b4 (-0.03)                                         |
| 514.331  | 424.07,   | 1.40  | b8o[2+] (0.10) : b8*[2+] (-0.38)                   |
| 521.265  | 350.02,   | 1.15  |                                                    |
| 539.926  | 1294.62,  | 4.28  |                                                    |
| 561.428  | 1395.65,  | 4.61  |                                                    |
| 595.337  | 4556.67,  | 15.07 | y5o (0.00) : y10o[2+] (-0.42) : b10-98[2+] (-0.46) |
| 613.351  | 12628.94, | 41.77 | y5 (0.00)                                          |
| 614.448  | 2745.72,  | 9.08  |                                                    |
| 625.104  | 1356.96,  | 4.48  |                                                    |
| 672.717  | 4188.30,  | 13.85 | a11o[2+] (0.39) : a11*[2+] (-0.09)                 |
| 690.022  | 5109.98,  | 16.90 |                                                    |
| 693.462  | 5496.28,  | 18.18 |                                                    |
| 694.642  | 8388.25,  | 27.74 |                                                    |
| 703.152  | 30231.90, | 100   |                                                    |
| 703.922  | 6672.20,  | 22.07 | c11[2+] (0.08)                                     |
| 742.647  | 4636.88,  | 15.33 |                                                    |
| 749.235  | 2697.82,  | 8.92  |                                                    |
| 751.717  | 18545.61, | 61.34 |                                                    |
| 752.457  | 9447.16,  | 31.24 |                                                    |
| 810.431  | 4343.90,  | 14.36 | c6 (0.03) : b7-98 (0.01)                           |
| 828.425  | 6292.09,  | 20.81 |                                                    |
| 829.442  | 1742.83,  | 5.76  |                                                    |
| 890.065  | 653.96,   | 2.16  | b7o (-0.32)                                        |
| 894.674  | 701.54,   | 2.32  |                                                    |
| 908.422  | 6658.14,  | 22.02 | b7 (0.02)                                          |
| 909.403  | 2401.81,  | 7.94  |                                                    |
| 910.605  | 1109.21,  | 3.66  | y8-98 (0.13)                                       |
| 935.587  | 398.68,   | 1.31  |                                                    |
| 943.547  | 334.82,   | 1.10  |                                                    |
| 947.589  | 412.01,   | 1.36  | b8-98 (0.11)                                       |
| 957.100  | 341.54,   | 1.12  |                                                    |
| 959.851  | 364.97,   | 1.20  |                                                    |
| 1008.534 | 910.91,   | 3.01  | y8 (0.08)                                          |
| 1039.561 | 824.11,   | 2.72  | y9-98 (0.05)                                       |
| 1208.577 | 330.74,   | 1.09  | y10 (0.04)                                         |
| 1267.541 | 365.16,   | 1.20  |                                                    |

S1927

# ProPhosSI MS/MS report

Mass: 777.333801269531 Charge: 2+

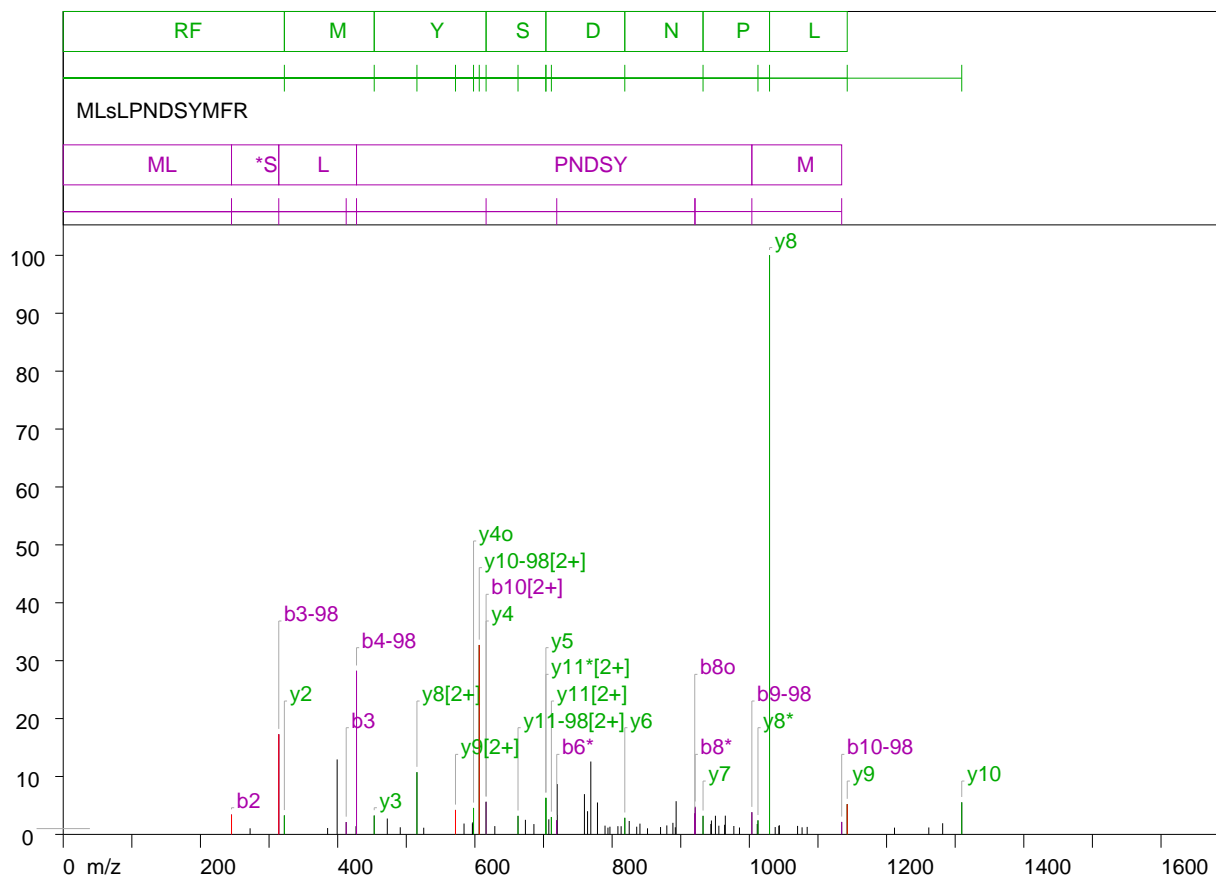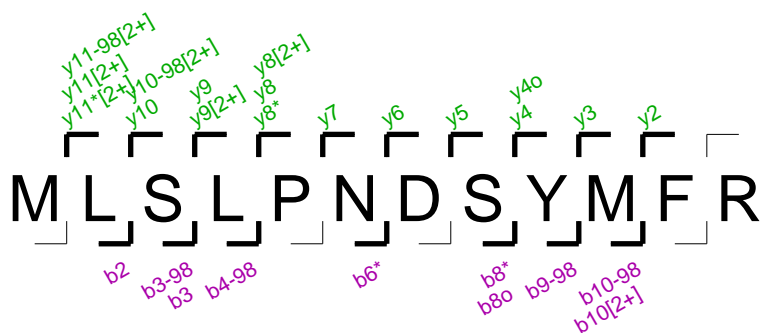

## Cav3.2 Rat

(45) 1925 MLsLPNDSYMF 1936 1552.645 (0.0063) Da

|                         |     |
|-------------------------|-----|
| Parent Ion              | m/z |
| No parent ions observed |     |

### Modifications and supporting evidence

| Position | Residue ID | Modification | Evidence                       |
|----------|------------|--------------|--------------------------------|
| 3        | (1927)     | Phospho (ST) | b2 => b3-98 : y9 => y10-98[2+] |

### Spectrum interpretation

| Rule                                   | passed/tests | Description                                                                                                                                                                                                                                                                                                                                                                                                                                                                                                                                                                                                                                                                                                                                                   |
|----------------------------------------|--------------|---------------------------------------------------------------------------------------------------------------------------------------------------------------------------------------------------------------------------------------------------------------------------------------------------------------------------------------------------------------------------------------------------------------------------------------------------------------------------------------------------------------------------------------------------------------------------------------------------------------------------------------------------------------------------------------------------------------------------------------------------------------|
| Parent ions present                    | 0/1          | Parent ions corresponding to the parent fragment - 1 phosphate ions were not found                                                                                                                                                                                                                                                                                                                                                                                                                                                                                                                                                                                                                                                                            |
| Three -98 Ions present                 | 1/1          | 6 des-phospho fragment ions were found.                                                                                                                                                                                                                                                                                                                                                                                                                                                                                                                                                                                                                                                                                                                       |
| Unique -98 transitions present         | 1/1          | transition b2 to b3-98, transition y9 to y10-98[2+] support unique phosphorylation at position 3 <br/>                                                                                                                                                                                                                                                                                                                                                                                                                                                                                                                                                                                                                                                        |
| Four Sequential b or y ions            | 1/1          | Sequence of four y ions found from y2 to y5.                                                                                                                                                                                                                                                                                                                                                                                                                                                                                                                                                                                                                                                                                                                  |
| Five of six sequential ions present    | 1/1          | Five of Six ions found between y1 and y6<br>Five of Six ions found between y2 and y7<br>Five of Six ions found between y3 and y8<br>Five of Six ions found between y4 and y9<br>Five of Six ions found between y5 and y10<br>Five of Six ions found between y6 and y11<br>Five of Six ions found between y7 and y12                                                                                                                                                                                                                                                                                                                                                                                                                                           |
| Proline directed fragmentation pattern | 2/2          | PASS: y8> y7 with ratio 31.2<br/><br>PASS: b5-98< b4-98<br/>                                                                                                                                                                                                                                                                                                                                                                                                                                                                                                                                                                                                                                                                                                  |
| PhosphoTyrosine transition present     | 0/0          | 0 of 0 phosphotyrosine transitions were found.                                                                                                                                                                                                                                                                                                                                                                                                                                                                                                                                                                                                                                                                                                                |
| Six of top ten ions identified         | 6/6          | ion 1 (mass: 1029.430908: intensity: 14969.470703125) assigned 1 times<br>ion 2 (mass: 606.3561401: intensity: 4896.9008789063) assigned 1 times<br>ion 3 (mass: 427.4430542: intensity: 4228.7421875) assigned 1 times<br>ion 4 (mass: 314.1543579: intensity: 2588.4716796875) assigned 1 times<br>ion 5 (mass: 399.2314453: intensity: 1937.6481933594) assigned 0 times<br>ion 6 (mass: 768.9203491: intensity: 1883.9006347656) assigned 0 times<br>ion 7 (mass: 515.5028076: intensity: 1608.3044433594) assigned 1 times<br>ion 8 (mass: 720.0646973: intensity: 1300.2141113281) assigned 0 times<br>ion 9 (mass: 759.6327515: intensity: 1040.9221191406) assigned 0 times<br>ion 10 (mass: 703.4667969: intensity: 944.3291625977) assigned 3 times |

### Ion Table

27 ions assigned of 40 ions above threshold (67%).

#### N-terminal ions

| AA | N-ion | b                          | b*      | b-98    | bo      |
|----|-------|----------------------------|---------|---------|---------|
| M  | 1     | 132.048                    | 115.021 | -       | 114.037 |
| L  | 2     | 245.132<br>245.2608032 (3) | 228.105 | -       | 227.121 |
| s  | 3     | 412.130                    | 395.104 | 314.144 | 394.120 |



|   |    |                                   |                            |                             |                            |
|---|----|-----------------------------------|----------------------------|-----------------------------|----------------------------|
| - | -  | *412.4208374 (2)                  | -                          | 314.1543579 (17)            | -                          |
| L | 4  | 525.214                           | 508.188                    | 427.228<br>427.4430542 (28) | 507.204                    |
| P | 5  | 622.267                           | 605.241                    | 524.281                     | 604.256                    |
| N | 6  | 736.310                           | 719.283<br>719.2722168 (2) | 638.324                     | 718.299                    |
| D | 7  | 851.337                           | 834.310                    | 753.351                     | 833.326                    |
| S | 8  | 938.369                           | 921.342<br>921.043396 (4)  | 840.383                     | 920.358<br>920.4223022 (3) |
| Y | 9  | 1101.432                          | 1084.406                   | 1003.446<br>1003.646362 (3) | 1083.422                   |
| M | 10 | 1232.473<br>*616.2994385 [2+] (5) | 1215.446                   | 1134.487<br>1134.570801 (2) | 1214.462                   |
| F | 11 | 1379.541                          | 1362.515                   | 1281.555                    | 1361.531                   |
| R | 12 | -                                 | -                          | -                           | -                          |

### C-terminal ions

| AA | C-ion | y                                                      | y*                                | y-98                              | yo                         |
|----|-------|--------------------------------------------------------|-----------------------------------|-----------------------------------|----------------------------|
| M  | 12    | -                                                      | -                                 | -                                 | -                          |
| L  | 11    | 1422.612<br>711.4890137 [2+] (3)                       | 1405.586<br>*703.4667969 [2+] (6) | 1324.626<br>662.836792 [2+] (3)   | 1404.602                   |
| s  | 10    | 1309.528<br>1309.532227 (5)                            | 1292.502                          | 1211.542<br>606.3561401 [2+] (32) | 1291.518                   |
| L  | 9     | 1142.530<br>571.7236938 [2+] (4)<br>1142.682373 (5)    | 1125.503                          | -                                 | 1124.519                   |
| P  | 8     | 1029.446<br>1029.430908 (100)<br>515.5028076 [2+] (10) | 1012.419<br>*1012.550232 (2)      | -                                 | 1011.435                   |
| N  | 7     | 932.393<br>932.5213623 (3)                             | 915.367                           | -                                 | 914.383                    |
| D  | 6     | 818.350<br>818.4660645 (2)                             | 801.324                           | -                                 | 800.340                    |
| S  | 5     | 703.323<br>*703.4667969 (6)                            | 686.297                           | -                                 | 685.313                    |
| Y  | 4     | 616.291<br>*616.2994385 (5)                            | 599.265                           | -                                 | 598.281<br>598.0068359 (4) |
| M  | 3     | 453.228<br>453.2871704 (3)                             | 436.201                           | -                                 | 435.217                    |
| F  | 2     | 322.187<br>*322.3223877 (3)                            | 305.161                           | -                                 | 304.177                    |
| R  | 1     | 175.119                                                | 158.092                           | -                                 | 157.108                    |

### Ion distribution

| Threshold | Ion count | Matches | % matched |
|-----------|-----------|---------|-----------|
| 0         | 139       | 54      | 38        |
| 0.5       | 102       | 45      | 44        |
| 1         | 76        | 38      | 50        |
| 2         | 40        | 27      | 67        |
| 3         | 28        | 20      | 71        |
| 4         | 18        | 13      | 72        |
| 5         | 15        | 10      | 66        |

|    |   |   |    |
|----|---|---|----|
| 10 | 7 | 5 | 71 |
|----|---|---|----|

### Observed ions > 1%

| m/z         | Intensity                    | % max | Assignment (delta)                           |
|-------------|------------------------------|-------|----------------------------------------------|
| 245.2608032 | 509.7752685547 <sub>3</sub>  | 3.40  | b2 (0.12)                                    |
| 272.3353271 | 157.5860443115 <sub>3</sub>  | 1.05  |                                              |
| 314.1543579 | 2588.4716796875 <sub>3</sub> | 17.29 | b3-98 (0.00)                                 |
| 322.3223877 | 491.2252502441 <sub>3</sub>  | 3.28  | y2 (0.13) : x4[2+] (-0.32)                   |
| 385.326355  | 164.2257995605 <sub>3</sub>  | 1.09  |                                              |
| 399.2314453 | 1937.6481933594 <sub>3</sub> | 12.94 |                                              |
| 412.4208374 | 319.6179199219 <sub>3</sub>  | 2.13  | b3 (0.29) : a7[2+] (0.24)                    |
| 426.7152405 | 212.3791351318 <sub>3</sub>  | 1.41  | b7[2+] (0.54) : b4-98 (-0.51)                |
| 427.4430542 | 4228.7421875 <sub>3</sub>    | 28.24 | b4-98 (0.21)                                 |
| 453.2871704 | 487.8203125 <sub>3</sub>     | 3.25  | y3 (0.05)                                    |
| 472.3034058 | 410.377746582 <sub>3</sub>   | 2.74  |                                              |
| 491.2266235 | 184.3630218506 <sub>3</sub>  | 1.23  |                                              |
| 515.5028076 | 1608.3044433594 <sub>3</sub> | 10.74 | y8[2+] (0.27)                                |
| 525.4046021 | 172.8534393311 <sub>3</sub>  | 1.15  | b4 (0.18)                                    |
| 571.7236938 | 632.0983886719 <sub>3</sub>  | 4.22  | y9[2+] (-0.04)                               |
| 584.1470947 | 280.8030700684 <sub>3</sub>  | 1.87  |                                              |
| 596.3467407 | 286.5258789063 <sub>3</sub>  | 1.91  |                                              |
| 597.1629028 | 317.5816650391 <sub>3</sub>  | 2.12  |                                              |
| 598.0068359 | 684.0692749023 <sub>3</sub>  | 4.56  | y4o (-0.27)                                  |
| 606.3561401 | 4896.9008789063 <sub>3</sub> | 32.71 | y10-98[2+] (0.08)                            |
| 616.2994385 | 842.1519165039 <sub>3</sub>  | 5.62  | y4 (0.00) : b10[2+] (-0.44)                  |
| 629.017334  | 214.1413116455 <sub>3</sub>  | 1.43  |                                              |
| 662.836792  | 479.4100036621 <sub>3</sub>  | 3.20  | y11-98[2+] (0.01)                            |
| 673.6072388 | 376.8112792969 <sub>3</sub>  | 2.51  |                                              |
| 686.0008545 | 266.6494140625 <sub>3</sub>  | 1.78  | z5 (-0.29) : y5* (-0.29)                     |
| 703.4667969 | 944.3291625977 <sub>3</sub>  | 6.30  | y11*[2+] (0.16) : z11[2+] (0.16) : y5 (0.14) |
| 707.7553101 | 389.7890625 <sub>3</sub>     | 2.60  | a6 (-0.56)                                   |
| 711.4890137 | 449.9616699219 <sub>3</sub>  | 3.00  | y11[2+] (-0.32)                              |
| 719.2722168 | 365.241394043 <sub>3</sub>   | 2.43  | b6* (-0.01)                                  |
| 720.0646973 | 1300.2141113281 <sub>3</sub> | 8.68  |                                              |
| 759.6327515 | 1040.9221191406 <sub>3</sub> | 6.95  |                                              |
| 764.1948853 | 599.635559082 <sub>3</sub>   | 4.00  |                                              |
| 768.9203491 | 1883.9006347656 <sub>3</sub> | 12.58 |                                              |
| 778.6564331 | 824.8245239258 <sub>3</sub>  | 5.51  |                                              |
| 789.6448975 | 226.6991271973 <sub>3</sub>  | 1.51  |                                              |
| 793.9119263 | 174.967376709 <sub>3</sub>   | 1.16  |                                              |
| 796.7960815 | 198.9216766357 <sub>3</sub>  | 1.32  |                                              |
| 808.4279785 | 212.4178161621 <sub>3</sub>  | 1.41  |                                              |

|             |                  |      |                        |
|-------------|------------------|------|------------------------|
| 813.1437378 | 211.539642334,   | 1.41 |                        |
| 818.4660645 | 428.5729370117,  | 2.86 | y6 (0.11)              |
| 824.8901978 | 346.3836364746,  | 2.31 |                        |
| 835.812439  | 199.1802368164,  | 1.33 |                        |
| 840.5360718 | 278.4684143066,  | 1.86 | b8-98 (0.15)           |
| 851.5939331 | 157.0005645752,  | 1.04 | b7 (0.25)              |
| 870.598999  | 190.1441040039,  | 1.27 |                        |
| 879.7311401 | 231.6435394287,  | 1.54 |                        |
| 888.5772095 | 299.2214355469,  | 1.99 |                        |
| 892.0735474 | 184.2808074951,  | 1.23 | a8o (-0.29)            |
| 893.3049927 | 858.083190918,   | 5.73 | a8* (-0.04)            |
| 920.4223022 | 541.3850097656,  | 3.61 | b8o (0.06)             |
| 921.043396  | 712.9293212891,  | 4.76 | b8* (-0.29)            |
| 932.5213623 | 479.6108093262,  | 3.20 | y7 (0.12)              |
| 943.8991699 | 269.4629516602,  | 1.80 |                        |
| 944.7007446 | 359.689453125,   | 2.40 |                        |
| 950.5393066 | 482.0356445313,  | 3.22 |                        |
| 955.5476074 | 224.8406524658,  | 1.50 | c8 (0.15)              |
| 963.9306641 | 248.7329406738,  | 1.66 |                        |
| 964.9552612 | 484.1148071289,  | 3.23 |                        |
| 977.423584  | 216.9875640869,  | 1.44 |                        |
| 985.6259766 | 177.7824707031,  | 1.18 |                        |
| 1003.646362 | 573.0520019531,  | 3.82 | b9-98 (0.19)           |
| 1011.48645  | 269.0284423828,  | 1.79 | y8o (0.05)             |
| 1012.550232 | 362.5911254883,  | 2.42 | y8* (0.13) : z8 (0.13) |
| 1029.430908 | 14969.470703125, | 100  | y8 (-0.01)             |
| 1037.674805 | 190.0495758057,  | 1.26 |                        |
| 1043        | 221.3274841309,  | 1.47 |                        |
| 1043.716431 | 236.1628112793,  | 1.57 |                        |
| 1070.281738 | 219.4331054688,  | 1.46 |                        |
| 1076.848755 | 182.9334411621,  | 1.22 |                        |
| 1084.255371 | 194.0590515137,  | 1.29 | b9* (-0.15)            |
| 1134.570801 | 322.4671020508,  | 2.15 | b10-98 (0.08)          |
| 1142.682373 | 781.8494873047,  | 5.22 | y9 (0.15)              |
| 1211.539429 | 174.5746612549,  | 1.16 | y10-98 (-0.00)         |
| 1261.53186  | 179.2445983887,  | 1.19 |                        |
| 1281.765747 | 288.3772583008,  | 1.92 | b11-98 (0.20)          |
| 1309.532227 | 829.2836914063,  | 5.53 | y10 (0.00)             |

S1966

# ProPhosSI MS/MS report

Mass: 813.388093 Charge: 2+

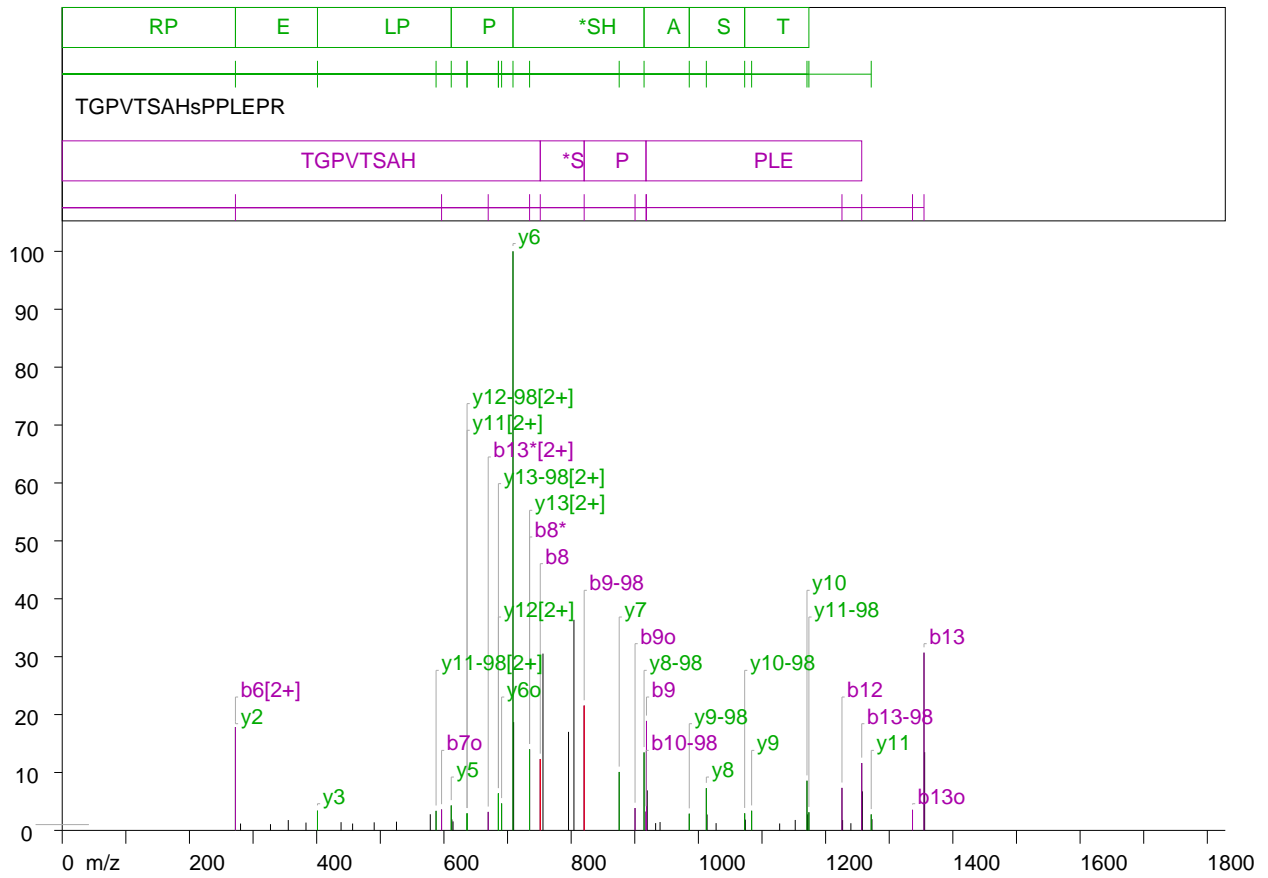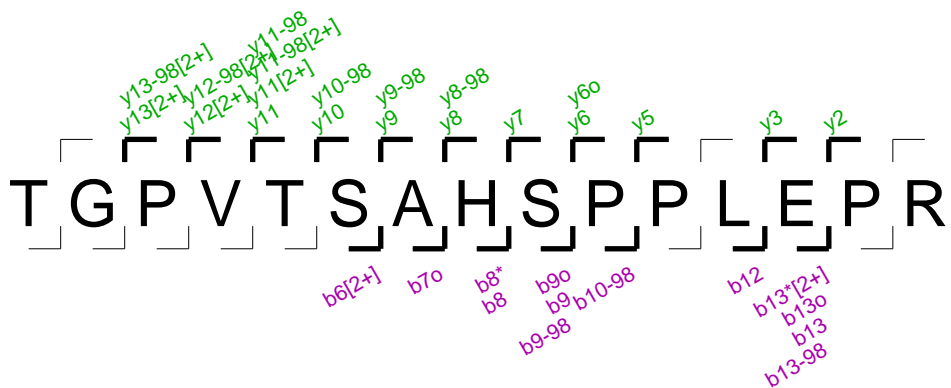

## Cav3.2 Rat

(43) 1958 TGPV TSAHsPPLEPR 1972 1624.761 (-0.0005) Da

|                         |     |
|-------------------------|-----|
| Parent Ion              | m/z |
| No parent ions observed |     |

### Modifications and supporting evidence

| Position | Residue ID | Modification | Evidence               |
|----------|------------|--------------|------------------------|
| 9        | (1966)     | Phospho (ST) | b8 => b9-98; y6=>y8-98 |

### Spectrum interpretation

| Rule                                   | passed/tests | Description                                                                                                                                                                                                                                                                                                                                                                                                                                                                                                                                                                                                                                                             |
|----------------------------------------|--------------|-------------------------------------------------------------------------------------------------------------------------------------------------------------------------------------------------------------------------------------------------------------------------------------------------------------------------------------------------------------------------------------------------------------------------------------------------------------------------------------------------------------------------------------------------------------------------------------------------------------------------------------------------------------------------|
| Parent ions present                    | 0/1          | Parent ions corresponding to the parent fragment - 1 phosphate ions were not found                                                                                                                                                                                                                                                                                                                                                                                                                                                                                                                                                                                      |
| Three -98 Ions present                 | 1/1          | 9 des-phospho fragment ions were found.                                                                                                                                                                                                                                                                                                                                                                                                                                                                                                                                                                                                                                 |
| Unique -98 transitions present         | 1/1          | transition b8 to b9-98, transition y6 to y8-98 support unique phosphorylation at position 9<br><br/>                                                                                                                                                                                                                                                                                                                                                                                                                                                                                                                                                                    |
| Four Sequential b or y ions            | 1/1          | Sequence of four y ions found from y8-98 to y11-98.                                                                                                                                                                                                                                                                                                                                                                                                                                                                                                                                                                                                                     |
| Five of six sequential ions present    | 1/1          | Five of Six ions found between y5 and y10<br>Five of Six ions found between y6 and y11<br>Five of Six ions found between y7 and y12<br>Five of Six ions found between y8 and y13<br>Five of Six ions found between y9 and y14                                                                                                                                                                                                                                                                                                                                                                                                                                           |
| Proline directed fragmentation pattern | 7/7          | NOTE: G-P is a low abundance fragmentation.<br>PASS: y13-98> y12-98 with ratio 2.17<br/><br>No proline ions at b3<br/><br>NOTE: S-P is a low abundance fragmentation.<br>PASS: y6> y5 with ratio 23.2<br/><br>PASS: b10-98< b9-98 with ratio 6.64<br/><br>NOTE: P-P is a low abundance fragmentation.<br>PASS: y5> y4<br/><br>PASS: b11-98< b10-98<br/><br>PASS: y2> y1<br/><br>PASS: b14-98< b13-98<br/>                                                                                                                                                                                                                                                               |
| PhosphoTyrosine transition present     | 0/0          | 0 of 0 phosphotyrosine transitions were found.                                                                                                                                                                                                                                                                                                                                                                                                                                                                                                                                                                                                                          |
| Six of top ten ions identified         | 6/6          | ion 1 (mass: 708.578: intensity: 6585.56)<br>assigned 1 times<br>ion 2 (mass: 804.361: intensity: 2395.21)<br>assigned 0 times<br>ion 3 (mass: 1354.653: intensity: 2021.25)<br>assigned 1 times<br>ion 4 (mass: 755.700: intensity: 2010.76)<br>assigned 0 times<br>ion 5 (mass: 820.453: intensity: 1419.25)<br>assigned 1 times<br>ion 6 (mass: 918.408: intensity: 1244.99)<br>assigned 1 times<br>ion 7 (mass: 709.591: intensity: 1231.32)<br>assigned 0 times<br>ion 8 (mass: 272.274: intensity: 1175.40)<br>assigned 2 times<br>ion 9 (mass: 795.839: intensity: 1120.66)<br>assigned 0 times<br>ion 10 (mass: 734.643: intensity: 922.35)<br>assigned 3 times |

## Ion Table

29 ions assigned of 39 ions above threshold (74%).

### N-terminal ions

| AA | N-ion | b                             | b*                           | b-98                      | bo                       |
|----|-------|-------------------------------|------------------------------|---------------------------|--------------------------|
| T  | 1     | 102.055                       | 85.028                       | -                         | 84.044                   |
| G  | 2     | 159.076                       | 142.050                      | -                         | 141.066                  |
| P  | 3     | 256.129                       | 239.103                      | -                         | 238.119                  |
| V  | 4     | 355.198                       | 338.171                      | -                         | 337.187                  |
| T  | 5     | 456.245                       | 439.219                      | -                         | 438.235                  |
| S  | 6     | 543.277<br>*272.274 [2+] (17) | 526.251                      | -                         | 525.267                  |
| A  | 7     | 614.314                       | 597.288                      | -                         | 596.304<br>596.294 (3)   |
| H  | 8     | 751.373<br>751.454 (12)       | 734.347<br>*734.643 (14)     | -                         | 733.363                  |
| s  | 9     | 918.372<br>918.408 (18)       | 901.345                      | 820.386<br>820.453 (21)   | 900.361<br>900.404 (3)   |
| P  | 10    | 1015.425                      | 998.398                      | 917.439<br>917.665 (3)    | 997.414                  |
| P  | 11    | 1112.477                      | 1095.451                     | 1014.491                  | 1094.467                 |
| L  | 12    | 1225.561<br>1225.689 (7)      | 1208.535                     | 1127.575                  | 1207.551                 |
| E  | 13    | 1354.604<br>1354.653 (30)     | 1337.577<br>669.618 [2+] (3) | 1256.618<br>1256.745 (11) | 1336.593<br>1336.582 (3) |
| P  | 14    | 1451.657                      | 1434.630                     | 1353.671                  | 1433.646                 |
| R  | 15    | -                             | -                            | -                         | -                        |

### C-terminal ions

| AA | C-ion | y                                             | y*       | y-98                                         | yo                     |
|----|-------|-----------------------------------------------|----------|----------------------------------------------|------------------------|
| T  | 15    | -                                             | -        | -                                            | -                      |
| G  | 14    | 1524.721                                      | 1507.694 | 1426.735                                     | 1506.710               |
| P  | 13    | 1467.699<br>*734.643 [2+] (14)                | 1450.673 | 1369.713<br>*685.636 [2+] (6)                | 1449.689               |
| V  | 12    | 1370.646<br>*685.636 [2+] (6)                 | 1353.620 | 1272.661<br>*636.360 [2+] (2)                | 1352.636               |
| T  | 11    | 1271.578<br>1271.668 (2)<br>*636.360 [2+] (2) | 1254.552 | 1173.592<br>587.646 [2+] (3)<br>1173.715 (3) | 1253.567               |
| S  | 10    | 1170.530<br>1170.668 (8)                      | 1153.504 | 1072.544<br>1072.727 (2)                     | 1152.520               |
| A  | 9     | 1083.498<br>1083.667 (3)                      | 1066.472 | 985.512<br>985.664 (2)                       | 1065.488               |
| H  | 8     | 1012.461<br>1012.483 (7)                      | 995.435  | 914.475<br>914.608 (13)                      | 994.451                |
| s  | 7     | 875.402<br>875.532 (10)                       | 858.376  | 777.416                                      | 857.392                |
| P  | 6     | 708.404<br>708.578 (100)                      | 691.377  | -                                            | 690.393<br>690.681 (4) |
| P  | 5     | 611.351<br>611.489 (4)                        | 594.325  | -                                            | 593.341                |
| L  | 4     | 514.298                                       | 497.272  | -                                            | 496.288                |
| E  | 3     | 401.214<br>401.222 (3)                        | 384.188  | -                                            | 383.204                |
| P  | 2     | 272.172<br>*272.274 (17)                      | 255.145  | -                                            | 254.161                |

|   |   |         |         |   |         |
|---|---|---------|---------|---|---------|
| R | 1 | 175.119 | 158.092 | - | 157.108 |
|---|---|---------|---------|---|---------|

### Ion distribution

| Threshold | Ion count | Matches | % matched |
|-----------|-----------|---------|-----------|
| 0         | 80        | 48      | 60        |
| 0.5       | 70        | 47      | 67        |
| 1         | 58        | 40      | 68        |
| 2         | 39        | 29      | 74        |
| 3         | 32        | 25      | 78        |
| 4         | 23        | 16      | 69        |
| 5         | 21        | 14      | 66        |
| 10        | 15        | 10      | 66        |

### Observed ions > 1%

| m/z     | Intensity            | % max | Assignment (delta)                            |
|---------|----------------------|-------|-----------------------------------------------|
| 272.274 | 1175.40 <sub>5</sub> | 17.84 | b6[2+] (0.13) : y2 (0.10)                     |
| 280.288 | 77.98 <sub>5</sub>   | 1.18  | c6[2+] (-0.36)                                |
| 327.362 | 70.93 <sub>5</sub>   | 1.07  | a4 (0.15)                                     |
| 355.340 | 117.55 <sub>5</sub>  | 1.78  | b4 (0.14)                                     |
| 383.180 | 88.86 <sub>5</sub>   | 1.34  | y3o (-0.02)                                   |
| 401.222 | 223.97 <sub>5</sub>  | 3.40  | y3 (0.00)                                     |
| 438.295 | 93.61 <sub>5</sub>   | 1.42  | y7[2+] (0.08) : b5o (0.05)                    |
| 456.457 | 78.04 <sub>5</sub>   | 1.18  | b5 (0.21)                                     |
| 490.367 | 91.75 <sub>5</sub>   | 1.39  |                                               |
| 525.407 | 99.35 <sub>5</sub>   | 1.50  | b6o (0.13)                                    |
| 578.541 | 183.75 <sub>5</sub>  | 2.79  |                                               |
| 587.646 | 222.33 <sub>5</sub>  | 3.37  | y11-98[2+] (0.34)                             |
| 596.294 | 237.38 <sub>5</sub>  | 3.60  | b7o (-0.01)                                   |
| 611.489 | 283.63 <sub>5</sub>  | 4.30  | y5 (0.13)                                     |
| 612.487 | 125.15 <sub>5</sub>  | 1.90  |                                               |
| 614.331 | 102.31 <sub>5</sub>  | 1.55  | b7 (0.01)                                     |
| 636.360 | 193.65 <sub>5</sub>  | 2.94  | y11[2+] (0.06) : y12-98[2+] (-0.47)           |
| 669.618 | 210.46 <sub>5</sub>  | 3.19  | b13*[2+] (0.32)                               |
| 685.636 | 420.51 <sub>5</sub>  | 6.38  | y13-98[2+] (0.27) : y12[2+] (-0.19)           |
| 690.681 | 306.64 <sub>5</sub>  | 4.65  | y6o (0.28)                                    |
| 708.578 | 6585.56 <sub>5</sub> | 100   | y6 (0.17)                                     |
| 709.591 | 1231.32 <sub>5</sub> | 18.69 |                                               |
| 734.643 | 922.35 <sub>5</sub>  | 14.00 | b8* (0.29) : y13[2+] (0.28) : c14[2+] (-0.20) |
| 751.454 | 812.17 <sub>5</sub>  | 12.33 | b8 (0.08)                                     |
| 755.700 | 2010.76 <sub>5</sub> | 30.53 |                                               |
| 795.839 | 1120.66 <sub>5</sub> | 17.01 |                                               |
| 804.361 | 2395.21 <sub>5</sub> | 36.37 |                                               |



|          |          |       |               |
|----------|----------|-------|---------------|
| 820.453  | 1419.25, | 21.55 | b9-98 (0.06)  |
| 875.532  | 664.64,  | 10.09 | y7 (0.12)     |
| 900.404  | 254.18,  | 3.85  | b9o (0.04)    |
| 914.608  | 886.97,  | 13.46 | y8-98 (0.13)  |
| 917.665  | 213.59,  | 3.24  | b10-98 (0.22) |
| 918.408  | 1244.99, | 18.90 | b9 (0.03)     |
| 919.593  | 455.28,  | 6.91  |               |
| 932.776  | 82.86,   | 1.25  |               |
| 939.738  | 94.84,   | 1.44  |               |
| 985.664  | 190.00,  | 2.88  | y9-98 (0.15)  |
| 1012.483 | 480.39,  | 7.29  | y8 (0.02)     |
| 1013.687 | 180.87,  | 2.74  |               |
| 1027.823 | 82.71,   | 1.25  |               |
| 1072.727 | 194.37,  | 2.95  | y10-98 (0.18) |
| 1073.736 | 122.48,  | 1.85  |               |
| 1083.667 | 223.36,  | 3.39  | y9 (0.16)     |
| 1127.752 | 78.89,   | 1.19  | b12-98 (0.17) |
| 1152.231 | 118.79,  | 1.80  | y10o (-0.28)  |
| 1170.668 | 565.01,  | 8.57  | y10 (0.13)    |
| 1171.656 | 182.44,  | 2.77  |               |
| 1173.715 | 206.15,  | 3.13  | y11-98 (0.12) |
| 1225.689 | 483.56,  | 7.34  | b12 (0.12)    |
| 1226.703 | 117.41,  | 1.78  |               |
| 1239.708 | 81.73,   | 1.24  |               |
| 1256.745 | 766.44,  | 11.63 | b13-98 (0.12) |
| 1257.742 | 444.01,  | 6.74  |               |
| 1271.668 | 181.90,  | 2.76  | y11 (0.08)    |
| 1272.866 | 127.83,  | 1.94  | y12-98 (0.20) |
| 1336.582 | 233.76,  | 3.54  | b13o (-0.01)  |
| 1354.653 | 2021.25, | 30.69 | b13 (0.04)    |
| 1355.683 | 889.57,  | 13.50 |               |

**S1983**

# ProPhosSI MS/MS report

Mass: 728.335422 Charge: 2+

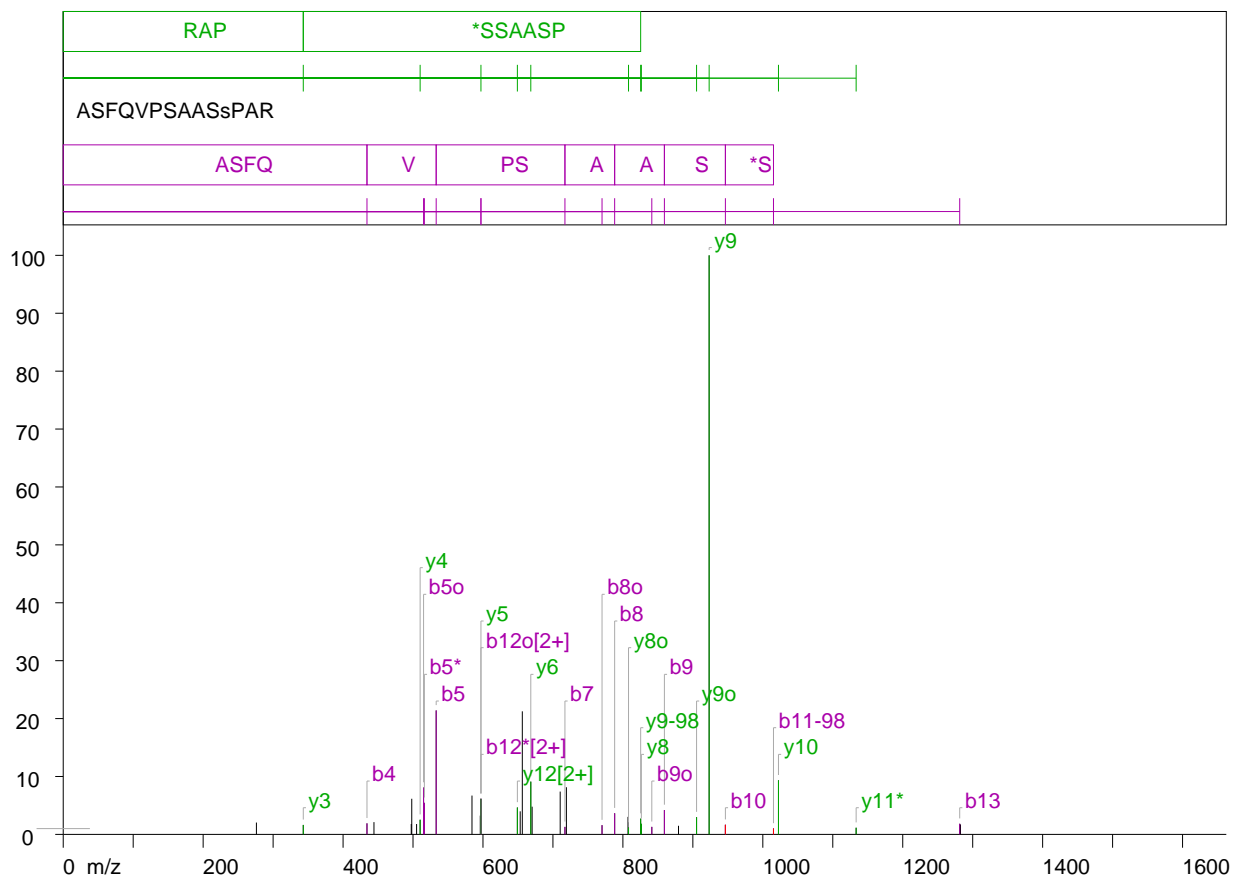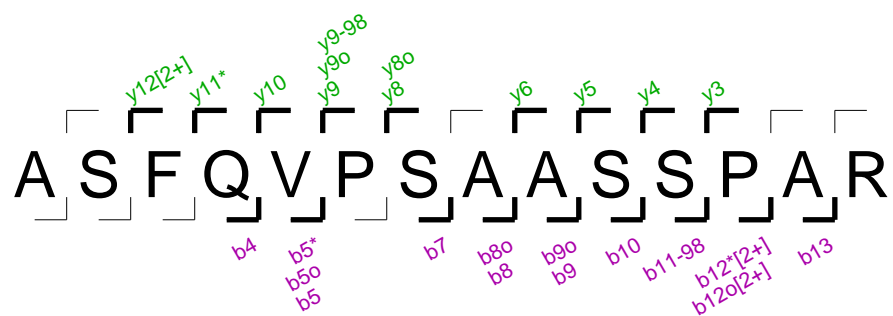

## Cav3.2 Rat

(53) 1973 ASFQVPSAASsPAR 1986 1454.655 (-0.0003) Da

|                         |     |
|-------------------------|-----|
| Parent Ion              | m/z |
| No parent ions observed |     |

## Modifications and supporting evidence

| Position | Residue ID | Modification | Evidence      |
|----------|------------|--------------|---------------|
| 11       | (1983)     | Phospho (ST) | b10 => b11-98 |

## Spectrum interpretation

| Rule                                   | passed/tests | Description                                                                                                                                                                                                                                                                                                                                                                                                                                                                                                                                                                                                                                                               |
|----------------------------------------|--------------|---------------------------------------------------------------------------------------------------------------------------------------------------------------------------------------------------------------------------------------------------------------------------------------------------------------------------------------------------------------------------------------------------------------------------------------------------------------------------------------------------------------------------------------------------------------------------------------------------------------------------------------------------------------------------|
| Parent ions present                    | 0/1          | Parent ions corresponding to the parent fragment - 1 phosphate ions were not found                                                                                                                                                                                                                                                                                                                                                                                                                                                                                                                                                                                        |
| Three -98 Ions present                 | 0/1          | 2 des-phospho fragment ions were found.                                                                                                                                                                                                                                                                                                                                                                                                                                                                                                                                                                                                                                   |
| Unique -98 transitions present         | 1/1          | transition b10 to b11-98 support unique phosphorylation at position 11<br><br/>                                                                                                                                                                                                                                                                                                                                                                                                                                                                                                                                                                                           |
| Four Sequential b or y ions            | 1/1          | Sequence of four b ions found from b7 to b10.                                                                                                                                                                                                                                                                                                                                                                                                                                                                                                                                                                                                                             |
| Five of six sequential ions present    | 1/1          | Five of Six ions found between b4 and b9<br>Five of Six ions found between b5 and b10<br>Five of Six ions found between b6 and b11<br>Five of Six ions found between b7 and b12                                                                                                                                                                                                                                                                                                                                                                                                                                                                                           |
| Proline directed fragmentation pattern | 4/4          | PASS: y9-98> y8-98<br/><br>PASS: b6< b5<br/><br>NOTE: S-P is a low abundance fragmentation.<br>PASS: y3> y2<br/><br>PASS: b12-98< b11-98<br/>                                                                                                                                                                                                                                                                                                                                                                                                                                                                                                                             |
| PhosphoTyrosine transition present     | 0/0          | 0 of 0 phosphotyrosine transitions were found.                                                                                                                                                                                                                                                                                                                                                                                                                                                                                                                                                                                                                            |
| Six of top ten ions identified         | 7/6          | ion 1 (mass: 923.279: intensity: 24957.59)<br>assigned 1 times<br>ion 2 (mass: 533.102: intensity: 5342.70)<br>assigned 1 times<br>ion 3 (mass: 656.223: intensity: 5304.78)<br>assigned 0 times<br>ion 4 (mass: 1022.365: intensity: 2329.85)<br>assigned 1 times<br>ion 5 (mass: 668.347: intensity: 2274.40)<br>assigned 1 times<br>ion 6 (mass: 719.250: intensity: 2032.92)<br>assigned 0 times<br>ion 7 (mass: 515.097: intensity: 2016.45)<br>assigned 1 times<br>ion 8 (mass: 710.348: intensity: 1845.63)<br>assigned 0 times<br>ion 9 (mass: 584.265: intensity: 1673.63)<br>assigned 1 times<br>ion 10 (mass: 597.095: intensity: 1536.21)<br>assigned 3 times |

## Ion Table

27 ions assigned of 39 ions above threshold (69%).

### N-terminal ions

| AA | N-ion | b       | b*      | b-98 | bo      |
|----|-------|---------|---------|------|---------|
| A  | 1     | 72.044  | 55.018  | -    | 54.034  |
| S  | 2     | 159.076 | 142.050 | -    | 141.066 |
| F  | 3     | 306.145 | 289.118 | -    | 288.134 |

|   |    |                          |                               |                          |                               |
|---|----|--------------------------|-------------------------------|--------------------------|-------------------------------|
| Q | 4  | 434.203<br>434.193 (1)   | 417.177                       | -                        | 416.193                       |
| V | 5  | 533.272<br>533.102 (21)  | 516.245<br>516.215 (5)        | -                        | 515.261<br>515.097 (8)        |
| P | 6  | 630.325                  | 613.298                       | -                        | 612.314                       |
| S | 7  | 717.357<br>717.151 (1)   | 700.330                       | -                        | 699.346                       |
| A | 8  | 788.394<br>788.231 (3)   | 771.367                       | -                        | 770.383<br>770.196 (1)        |
| A | 9  | 859.431<br>859.316 (4)   | 842.404                       | -                        | 841.420<br>841.313 (1)        |
| S | 10 | 946.463<br>946.527 (1)   | 929.436                       | -                        | 928.452                       |
| s | 11 | 1113.461                 | 1096.435                      | 1015.475<br>1015.264 (1) | 1095.451                      |
| P | 12 | 1210.514                 | 1193.488<br>*597.095 [2+] (6) | 1112.528                 | 1192.504<br>*597.095 [2+] (6) |
| A | 13 | 1281.551<br>1281.436 (1) | 1264.525                      | 1183.565                 | 1263.541                      |
| R | 14 | -                        | -                             | -                        | -                             |

### C-terminal ions

| AA | C-ion | y                            | y*                        | y-98                   | yo                     |
|----|-------|------------------------------|---------------------------|------------------------|------------------------|
| A  | 14    | -                            | -                         | -                      | -                      |
| S  | 13    | 1384.626                     | 1367.599                  | 1286.640               | 1366.615               |
| F  | 12    | 1297.594<br>649.165 [2+] (4) | 1280.567                  | 1199.608               | 1279.583               |
| Q  | 11    | 1150.525                     | 1133.499<br>*1133.419 (1) | 1052.539               | 1132.515               |
| V  | 10    | 1022.467<br>1022.365 (9)     | 1005.440                  | 924.481                | 1004.456               |
| P  | 9     | 923.398<br>923.279 (100)     | 906.372                   | 825.412<br>825.398 (2) | 905.388<br>905.315 (2) |
| S  | 8     | 826.346<br>826.362 (1)       | 809.319                   | 728.360                | 808.335<br>808.049 (1) |
| A  | 7     | 739.313                      | 722.287                   | 641.328                | 721.303                |
| A  | 6     | 668.276<br>668.347 (9)       | 651.250                   | 570.290                | 650.266                |
| S  | 5     | 597.239<br>*597.095 (6)      | 580.213                   | 499.253                | 579.229                |
| s  | 4     | 510.207<br>510.166 (2)       | 493.181                   | 412.221                | 492.197                |
| P  | 3     | 343.209<br>343.147 (1)       | 326.182                   | -                      | 325.198                |
| A  | 2     | 246.156                      | 229.130                   | -                      | 228.146                |
| R  | 1     | 175.119                      | 158.092                   | -                      | 157.108                |

### Ion distribution

| Threshold | Ion count | Matches | % matched |
|-----------|-----------|---------|-----------|
| 0         | 69        | 39      | 56        |
| 0.5       | 51        | 33      | 64        |
| 1         | 39        | 27      | 69        |
| 2         | 24        | 15      | 62        |

|    |    |    |    |
|----|----|----|----|
| 3  | 19 | 11 | 57 |
| 4  | 15 | 10 | 66 |
| 5  | 12 | 8  | 66 |
| 10 | 3  | 2  | 66 |

### Observed ions > 1%

| m/z      | Intensity             | % max | Assignment (delta)                              |
|----------|-----------------------|-------|-------------------------------------------------|
| 276.154  | 510.95 <sub>1</sub>   | 2.04  | c5[2+] (0.50)                                   |
| 343.147  | 408.17 <sub>1</sub>   | 1.63  | y3 (-0.06)                                      |
| 434.193  | 475.60 <sub>1</sub>   | 1.90  | b4 (-0.01)                                      |
| 444.153  | 528.75 <sub>1</sub>   | 2.11  |                                                 |
| 497.476  | 448.07 <sub>1</sub>   | 1.79  |                                                 |
| 498.178  | 1536.20 <sub>1</sub>  | 6.15  |                                                 |
| 505.107  | 446.71 <sub>1</sub>   | 1.78  | a5 (-0.17)                                      |
| 510.166  | 631.75 <sub>1</sub>   | 2.53  | y4 (-0.04)                                      |
| 515.097  | 2016.45 <sub>1</sub>  | 8.07  | b5o (-0.16)                                     |
| 516.215  | 1359.23 <sub>1</sub>  | 5.44  | b5* (-0.03)                                     |
| 533.102  | 5342.70 <sub>1</sub>  | 21.40 | b5 (-0.17)                                      |
| 584.265  | 1673.63 <sub>1</sub>  | 6.70  | a6o (-0.05)                                     |
| 596.147  | 809.81 <sub>1</sub>   | 3.24  |                                                 |
| 597.095  | 1536.21 <sub>1</sub>  | 6.15  | b12o[2+] (0.33) : y5 (-0.14) : b12*[2+] (-0.15) |
| 649.165  | 1159.20 <sub>1</sub>  | 4.64  | y12[2+] (-0.13)                                 |
| 653.199  | 994.59 <sub>1</sub>   | 3.98  |                                                 |
| 656.223  | 5304.78 <sub>1</sub>  | 21.25 |                                                 |
| 668.347  | 2274.40 <sub>1</sub>  | 9.11  | y6 (0.07)                                       |
| 670.246  | 1194.62 <sub>1</sub>  | 4.78  |                                                 |
| 710.348  | 1845.63 <sub>1</sub>  | 7.39  |                                                 |
| 717.151  | 323.25 <sub>1</sub>   | 1.29  | b7 (-0.20)                                      |
| 719.250  | 2032.92 <sub>1</sub>  | 8.14  |                                                 |
| 770.196  | 397.27 <sub>1</sub>   | 1.59  | b8o (-0.18)                                     |
| 788.231  | 911.01 <sub>1</sub>   | 3.65  | b8 (-0.16)                                      |
| 807.277  | 756.02 <sub>1</sub>   | 3.02  |                                                 |
| 808.049  | 292.93 <sub>1</sub>   | 1.17  | y8o (-0.28)                                     |
| 825.398  | 678.69 <sub>1</sub>   | 2.71  | y9-98 (-0.01)                                   |
| 826.362  | 456.49 <sub>1</sub>   | 1.82  | y8 (0.01)                                       |
| 841.313  | 324.28 <sub>1</sub>   | 1.29  | b9o (-0.10)                                     |
| 859.316  | 1049.42 <sub>1</sub>  | 4.20  | b9 (-0.11)                                      |
| 879.477  | 371.58 <sub>1</sub>   | 1.48  |                                                 |
| 905.315  | 742.52 <sub>1</sub>   | 2.97  | y9o (-0.07)                                     |
| 923.279  | 24957.59 <sub>1</sub> | 100   | y9 (-0.11)                                      |
| 946.527  | 414.48 <sub>1</sub>   | 1.66  | b10 (0.06)                                      |
| 1015.264 | 253.09 <sub>1</sub>   | 1.01  | b11-98 (-0.21)                                  |

|          |                      |      |                            |
|----------|----------------------|------|----------------------------|
| 1022.365 | 2329.85 <sub>,</sub> | 9.33 | y10 (-0.10)                |
| 1133.419 | 286.92 <sub>,</sub>  | 1.14 | y11* (-0.08) : z11 (-0.08) |
| 1281.436 | 457.90 <sub>,</sub>  | 1.83 | b13 (-0.11)                |
| 1282.550 | 428.49 <sub>,</sub>  | 1.71 |                            |

**S1995**



# ProPhosSI MS/MS report

Mass: 647.799255371094 Charge: 2+

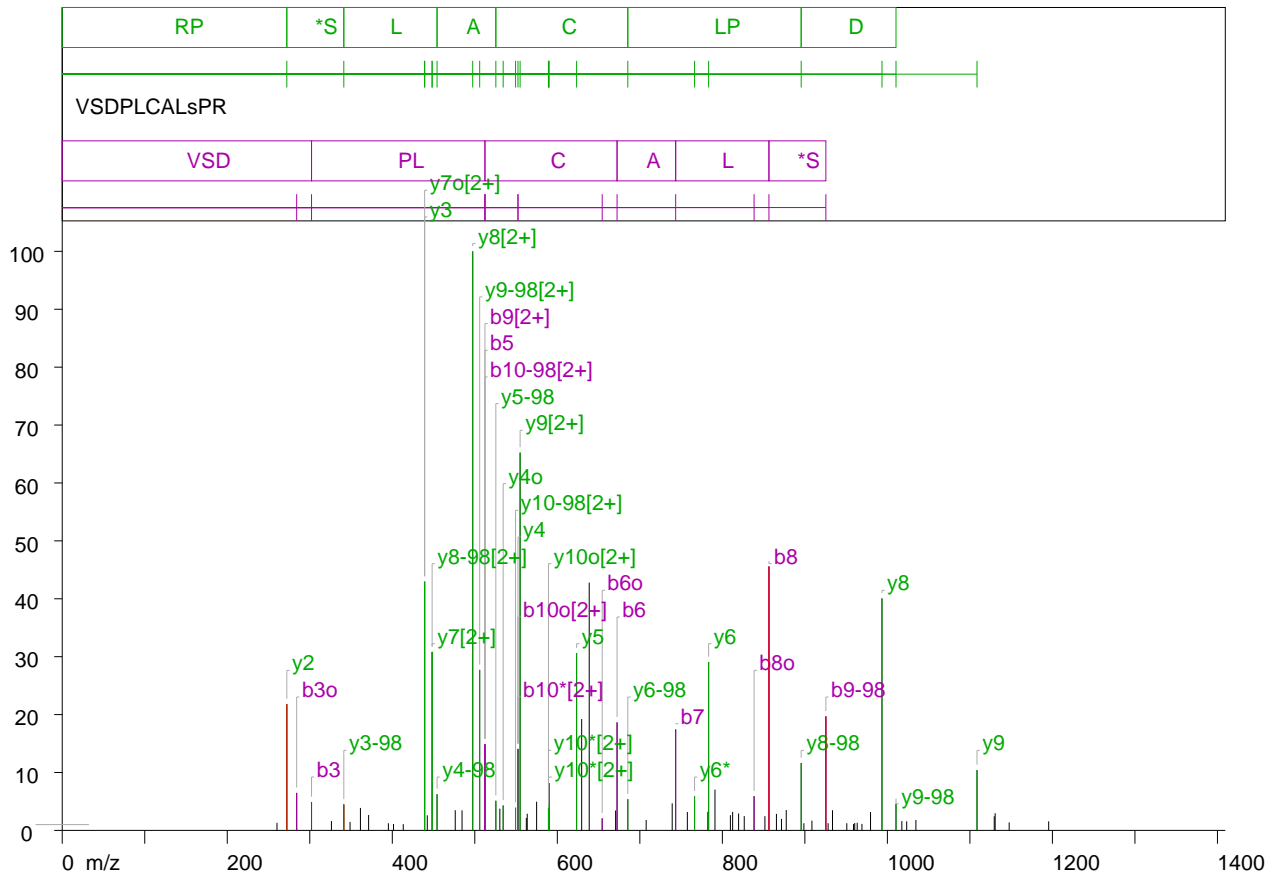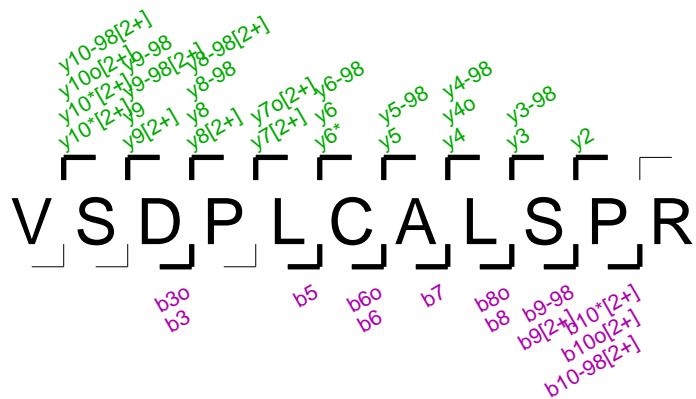

## Cav3.2 Rat

(66) 1987 VSDPLCALsPR 1997 1293.578 (0.0040) Da

|                         |     |
|-------------------------|-----|
| Parent Ion              | m/z |
| No parent ions observed |     |

## Modifications and supporting evidence

| Position | Residue ID | Modification | Evidence                  |
|----------|------------|--------------|---------------------------|
| 9        | (1995)     | Phospho (ST) | b8 => b9-98 : y2 => y3-98 |

## Spectrum interpretation

| Rule                                   | passed/tests | Description                                                                                                                                                                                                                                                                                                                                                                                                                                                                                                                                                                                                                                                                                                                                           |
|----------------------------------------|--------------|-------------------------------------------------------------------------------------------------------------------------------------------------------------------------------------------------------------------------------------------------------------------------------------------------------------------------------------------------------------------------------------------------------------------------------------------------------------------------------------------------------------------------------------------------------------------------------------------------------------------------------------------------------------------------------------------------------------------------------------------------------|
| Parent ions present                    | 0/1          | Parent ions corresponding to the parent fragment - 1 phosphate ions were not found                                                                                                                                                                                                                                                                                                                                                                                                                                                                                                                                                                                                                                                                    |
| Three -98 Ions present                 | 1/1          | 9 des-phospho fragment ions were found.                                                                                                                                                                                                                                                                                                                                                                                                                                                                                                                                                                                                                                                                                                               |
| Unique -98 transitions present         | 1/1          | transition b8 to b9-98, transition y2 to y3-98 support unique phosphorylation at position 9<br><br/>                                                                                                                                                                                                                                                                                                                                                                                                                                                                                                                                                                                                                                                  |
| Four Sequential b or y ions            | 1/1          | Sequence of four b ions found from b5 to b8.<br>Sequence of four y ions found from y2 to y5-98.                                                                                                                                                                                                                                                                                                                                                                                                                                                                                                                                                                                                                                                       |
| Five of six sequential ions present    | 1/1          | Five of Six ions found between b3 and b8<br>Five of Six ions found between b4 and b9<br>Five of Six ions found between b5 and b10<br>Five of Six ions found between b6 and b11<br>Five of Six ions found between y1 and y6<br>Five of Six ions found between y2 and y7<br>Five of Six ions found between y3 and y8<br>Five of Six ions found between y4 and y9<br>Five of Six ions found between y5 and y10                                                                                                                                                                                                                                                                                                                                           |
| Proline directed fragmentation pattern | 4/4          | PASS: y8-98> y7-98<br/><br>PASS: b4< b3<br/><br>NOTE: S-P is a low abundance fragmentation.<br>PASS: y2> y1<br/><br>PASS: b10-98< b9-98 with ratio 1.32<br/>                                                                                                                                                                                                                                                                                                                                                                                                                                                                                                                                                                                          |
| PhosphoTyrosine transition present     | 0/0          | 0 of 0 phosphotyrosine transitions were found.                                                                                                                                                                                                                                                                                                                                                                                                                                                                                                                                                                                                                                                                                                        |
| Six of top ten ions identified         | 9/6          | ion 1 (mass: 497.4551697: intensity: 17960.2265625) assigned 1 times<br>ion 2 (mass: 554.90625: intensity: 11718.3818359375) assigned 1 times<br>ion 3 (mass: 856.4442139: intensity: 8187.43359375) assigned 1 times<br>ion 4 (mass: 439.2024536: intensity: 7715.8842773438) assigned 2 times<br>ion 5 (mass: 638.6646729: intensity: 7686.0537109375) assigned 0 times<br>ion 6 (mass: 993.4265137: intensity: 7196.0063476563) assigned 1 times<br>ion 7 (mass: 448.282196: intensity: 5536.3461914063) assigned 2 times<br>ion 8 (mass: 623.3571777: intensity: 5497.734375) assigned 1 times<br>ion 9 (mass: 783.355957: intensity: 5221.4497070313) assigned 1 times<br>ion 10 (mass: 505.915802: intensity: 4977.8823242188) assigned 1 times |

## Ion Table

33 ions assigned of 58 ions above threshold (56%).

## N-terminal ions

| AA | N-ion | b                                 | b*                                 | b-98                              | bo                                 |
|----|-------|-----------------------------------|------------------------------------|-----------------------------------|------------------------------------|
| V  | 1     | 100.076                           | 83.049                             | -                                 | 82.065                             |
| S  | 2     | 187.108                           | 170.081                            | -                                 | 169.097                            |
| D  | 3     | 302.135<br>302.1261597 (4)        | 285.108                            | -                                 | 284.124<br>284.1365662 (6)         |
| P  | 4     | 399.187                           | 382.161                            | -                                 | 381.177                            |
| L  | 5     | 512.272<br>*512.302124 (14)       | 495.245                            | -                                 | 494.261                            |
| C  | 6     | 672.302<br>672.3943481 (18)       | 655.276                            | -                                 | 654.292<br>654.4123535 (2)         |
| A  | 7     | 743.339<br>743.4266357 (17)       | 726.313                            | -                                 | 725.329                            |
| L  | 8     | 856.423<br>856.4442139 (45)       | 839.397                            | -                                 | 838.413<br>838.4448242 (5)         |
| s  | 9     | 1023.422<br>*512.302124 [2+] (14) | 1006.395                           | 925.436<br>925.4222412 (19)       | 1005.411                           |
| P  | 10    | 1120.475                          | 1103.448<br>*552.3293457 [2+] (14) | 1022.489<br>*512.302124 [2+] (14) | 1102.464<br>*552.3293457 [2+] (14) |
| R  | 11    | -                                 | -                                  | -                                 | -                                  |

## C-terminal ions

| AA | C-ion | y                                                     | y*                                                         | y-98                                                 | yo                                |
|----|-------|-------------------------------------------------------|------------------------------------------------------------|------------------------------------------------------|-----------------------------------|
| V  | 11    | -                                                     | -                                                          | -                                                    | -                                 |
| S  | 10    | 1195.518                                              | 1178.491<br>*590.1223755 [2+] (8)<br>*589.2608643 [2+] (3) | 1097.532<br>549.3804932 [2+] (3)                     | 1177.507<br>*589.2608643 [2+] (3) |
| D  | 9     | 1108.486<br>554.90625 [2+] (65)<br>1108.611572 (10)   | 1091.459                                                   | 1010.500<br>505.915802 [2+] (27)<br>1010.45166 (4)   | 1090.475                          |
| P  | 8     | 993.459<br>497.4551697 [2+] (100)<br>993.4265137 (40) | 976.432                                                    | 895.473<br>895.5281982 (11)<br>*448.282196 [2+] (30) | 975.448                           |
| L  | 7     | 896.406<br>*448.282196 [2+] (30)                      | 879.379                                                    | 798.420                                              | 878.395<br>*439.2024536 [2+] (42) |
| C  | 6     | 783.322<br>783.355957 (29)                            | 766.295<br>*766.3364258 (5)                                | 685.336<br>685.4211426 (5)                           | 765.311                           |
| A  | 5     | 623.291<br>623.3571777 (30)                           | 606.265                                                    | 525.305<br>525.4963989 (5)                           | 605.281                           |
| L  | 4     | 552.254<br>*552.3293457 (14)                          | 535.228                                                    | 454.268<br>454.2500916 (6)                           | 534.244<br>534.3762817 (4)        |
| s  | 3     | 439.170<br>*439.2024536 (42)                          | 422.144                                                    | 341.184<br>341.2322388 (4)                           | 421.160                           |
| P  | 2     | 272.172<br>272.1773682 (21)                           | 255.145                                                    | -                                                    | 254.161                           |
| R  | 1     | 175.119                                               | 158.092                                                    | -                                                    | 157.108                           |

## Ion distribution

| Threshold | Ion count | Matches | % matched |
|-----------|-----------|---------|-----------|
| 0         | 111       | 48      | 43        |
| 0.5       | 101       | 45      | 44        |
| 1         | 79        | 37      | 46        |
| 2         | 58        | 33      | 56        |
| 3         | 46        | 31      | 67        |

|    |    |    |    |
|----|----|----|----|
| 4  | 33 | 28 | 84 |
| 5  | 27 | 24 | 88 |
| 10 | 19 | 17 | 89 |

### Observed ions > 1%

| m/z         | Intensity         | % max | Assignment (delta)                                   |
|-------------|-------------------|-------|------------------------------------------------------|
| 260.2436218 | 235.6178894043,   | 1.31  |                                                      |
| 272.1773682 | 3915.623046875,   | 21.80 | y2 (0.00)                                            |
| 284.1365662 | 1163.2344970703,  | 6.47  | b3o (0.01)                                           |
| 302.1261597 | 881.7331542969,   | 4.90  | b3 (-0.00)                                           |
| 326.2348938 | 289.0704040527,   | 1.60  | x5[2+] (0.08)                                        |
| 341.2322388 | 805.7885742188,   | 4.48  | y3-98 (0.04)                                         |
| 348.7924805 | 261.4540100098,   | 1.45  | a7o[2+] (-0.37)                                      |
| 361.3694458 | 696.9048461914,   | 3.88  |                                                      |
| 371.2931213 | 476.7682189941,   | 2.65  | a4 (0.10)                                            |
| 395.2716675 | 221.8987579346,   | 1.23  |                                                      |
| 401.4552612 | 199.0364379883,   | 1.10  |                                                      |
| 413.3076172 | 194.1717529297,   | 1.08  |                                                      |
| 439.2024536 | 7715.8842773438,  | 42.96 | y3 (0.03) : y7o[2+] (-0.49)                          |
| 442.4216919 | 467.5187072754,   | 2.60  |                                                      |
| 448.282196  | 5536.3461914063,  | 30.82 | y8-98[2+] (0.04) : y7[2+] (-0.42)                    |
| 454.2500916 | 1123.1224365234,  | 6.25  | y4-98 (-0.01)                                        |
| 476.2983398 | 626.6051025391,   | 3.48  |                                                      |
| 484.5246887 | 622.3198852539,   | 3.46  | a5 (0.24)                                            |
| 497.4551697 | 17960.2265625,    | 100   | y8[2+] (0.22)                                        |
| 505.915802  | 4977.8823242188,  | 27.71 | y9-98[2+] (0.16)                                     |
| 512.302124  | 2673.0668945313,  | 14.88 | b10-98[2+] (0.55) : b9[2+] (0.08) : b5 (0.03)        |
| 525.4963989 | 920.1224365234,   | 5.12  | y5-98 (0.19)                                         |
| 530.3309326 | 674.0373535156,   | 3.75  |                                                      |
| 534.3762817 | 773.2008056641,   | 4.30  | y4o (0.13)                                           |
| 549.3804932 | 703.1048583984,   | 3.91  | y10-98[2+] (0.11)                                    |
| 552.3293457 | 2526.7565917969,  | 14.06 | b10o[2+] (0.59) : b10*[2+] (0.10) : y4 (0.07)        |
| 554.90625   | 11718.3818359375, | 65.24 | y9[2+] (0.15)                                        |
| 562.4329224 | 385.3946228027,   | 2.14  |                                                      |
| 563.5355225 | 517.4490966797,   | 2.88  |                                                      |
| 574.909668  | 890.2751464844,   | 4.95  |                                                      |
| 589.2608643 | 694.7947998047,   | 3.86  | y10o[2+] (0.00) : y10*[2+] (-0.48) : z10[2+] (-0.48) |
| 590.1223755 | 1466.11328125,    | 8.16  | y10*[2+] (0.37) : z10[2+] (0.37)                     |
| 623.3571777 | 5497.734375,      | 30.61 | y5 (0.06)                                            |
| 629.4918213 | 3454.5732421875,  | 19.23 |                                                      |
| 638.6646729 | 7686.0537109375,  | 42.79 |                                                      |
| 654.4123535 | 372.9429931641,   | 2.07  | b6o (0.12)                                           |

|             |                  |       |                        |
|-------------|------------------|-------|------------------------|
| 670.6335449 | 617.2603759766,  | 3.43  |                        |
| 672.3943481 | 3350.1962890625, | 18.65 | b6 (0.09)              |
| 685.4211426 | 968.354675293,   | 5.39  | y6-98 (0.08)           |
| 707.6616211 | 321.129699707,   | 1.78  |                        |
| 739.2200928 | 838.8792724609,  | 4.67  |                        |
| 743.4266357 | 3132.6760253906, | 17.44 | b7 (0.08)              |
| 757.5592041 | 570.9163208008,  | 3.17  |                        |
| 766.3364258 | 1056.8063964844, | 5.88  | y6* (0.04) : z6 (0.04) |
| 782.3835449 | 576.3665771484,  | 3.20  |                        |
| 783.355957  | 5221.4497070313, | 29.07 | y6 (0.03)              |
| 791.0617676 | 1265.9880371094, | 7.04  |                        |
| 809.7320557 | 471.3146362305,  | 2.62  |                        |
| 812.4608154 | 573.0699462891,  | 3.19  |                        |
| 819.696167  | 523.9492797852,  | 2.91  |                        |
| 826.5273438 | 443.1267700195,  | 2.46  |                        |
| 838.4448242 | 1061.2895507813, | 5.90  | b8o (0.03)             |
| 851.5666504 | 441.7756958008,  | 2.45  |                        |
| 856.4442139 | 8187.43359375,   | 45.58 | b8 (0.02)              |
| 865.5306396 | 512.6693115234,  | 2.85  |                        |
| 871.6334229 | 355.8700561523,  | 1.98  |                        |
| 877.4384766 | 631.4690551758,  | 3.51  |                        |
| 895.5281982 | 2091.8537597656, | 11.64 | y8-98 (0.05)           |
| 898.7810059 | 221.9821472168,  | 1.23  |                        |
| 908.5500488 | 302.9566650391,  | 1.68  |                        |
| 925.4222412 | 3536.3520507813, | 19.68 | b9-98 (-0.01)          |
| 928.1762695 | 223.2551269531,  | 1.24  |                        |
| 933.484375  | 625.7904052734,  | 3.48  |                        |
| 950.8054199 | 222.1949310303,  | 1.23  |                        |
| 958.998291  | 197.1584014893,  | 1.09  |                        |
| 960.4506836 | 229.2367248535,  | 1.27  |                        |
| 963.4106445 | 236.8723144531,  | 1.31  |                        |
| 969.1685791 | 201.3105773926,  | 1.12  |                        |
| 979.5788574 | 566.8957519531,  | 3.15  |                        |
| 993.4265137 | 7196.0063476563, | 40.06 | y8 (-0.03)             |
| 1010.45166  | 824.2544555664,  | 4.58  | y9-98 (-0.04)          |
| 1017.514648 | 288.8084716797,  | 1.60  |                        |
| 1023.411499 | 281.4692077637,  | 1.56  | b9 (-0.01)             |
| 1034.560913 | 323.6397399902,  | 1.80  |                        |
| 1108.611572 | 1870.6478271484, | 10.41 | y9 (0.12)              |
| 1129.501099 | 439.0194091797,  | 2.44  |                        |
| 1130.605591 | 532.96484375,    | 2.96  |                        |
| 1147.594604 | 248.7687530518,  | 1.38  |                        |
| 1195.464233 | 281.5608520508,  | 1.56  | y10 (-0.05)            |

S2054

# ProPhosSI MS/MS report

Mass: 695.818525 Charge: 2+

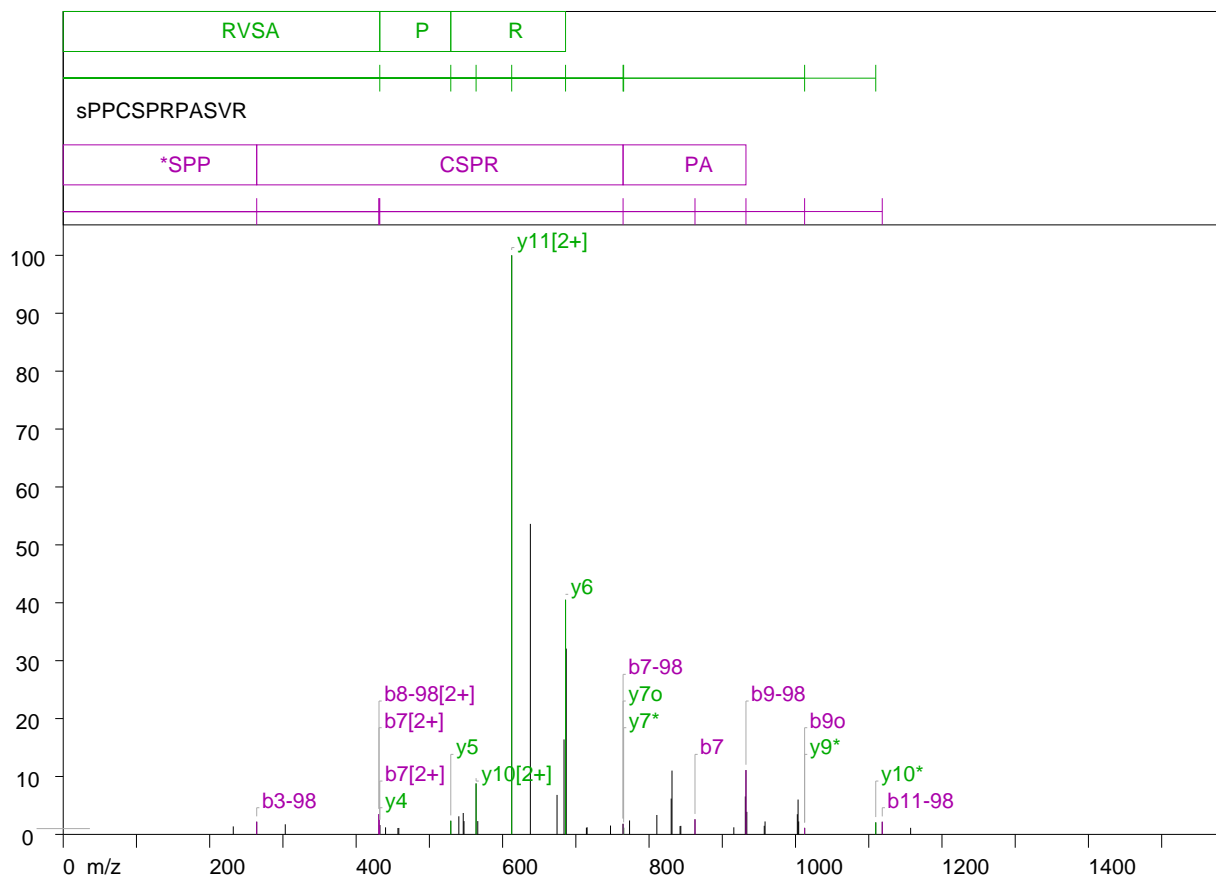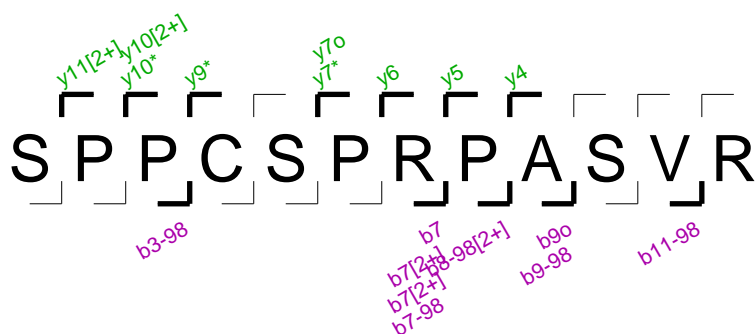

## Cav3.2 Rat

(17) 2054 sPPCSPRPASVR 2065 1389.622 (-0.0010) Da

|                         |     |
|-------------------------|-----|
| Parent Ion              | m/z |
| No parent ions observed |     |

## Modifications and supporting evidence

| Position | Residue ID | Modification | Evidence                |
|----------|------------|--------------|-------------------------|
| 1        | (2054)     | Phospho (ST) | b3-98, y10[2+], y11[2+] |

## Spectrum interpretation

| Rule                                   | passed/tests | Description                                                                                                                                                                                                                                                                                                                                                                                                                                                                                                                                                                                                                                                            |
|----------------------------------------|--------------|------------------------------------------------------------------------------------------------------------------------------------------------------------------------------------------------------------------------------------------------------------------------------------------------------------------------------------------------------------------------------------------------------------------------------------------------------------------------------------------------------------------------------------------------------------------------------------------------------------------------------------------------------------------------|
| Parent ions present                    | 0/1          | Parent ions corresponding to the parent fragment - 1 phosphate ions were not found                                                                                                                                                                                                                                                                                                                                                                                                                                                                                                                                                                                     |
| Three -98 Ions present                 | 1/1          | 5 des-phospho fragment ions were found.                                                                                                                                                                                                                                                                                                                                                                                                                                                                                                                                                                                                                                |
| Unique -98 transitions present         | 0/1          | No transitions found to support unique phosphorylation at position 1<br><br/>                                                                                                                                                                                                                                                                                                                                                                                                                                                                                                                                                                                          |
| Four Sequential b or y ions            | 0/1          | Sequence of four y or b ions not observed                                                                                                                                                                                                                                                                                                                                                                                                                                                                                                                                                                                                                              |
| Five of six sequential ions present    | 0/1          |                                                                                                                                                                                                                                                                                                                                                                                                                                                                                                                                                                                                                                                                        |
| Proline directed fragmentation pattern | 3/6          | NOTE: S-P is a low abundance fragmentation.<br>PASS: y11> y10 with ratio 11.3<br/><br>No proline ions at b2-98<br/><br>NOTE: P-P is a low abundance fragmentation.<br>PASS: y10> y9<br/><br>FAIL: b3-98> b2-98<br/>NOTE: S-P is a low abundance fragmentation.<br>FAIL: y7< y6<br/>No proline ions at b6-98<br/><br>PASS: y5> y4 with ratio 1.46<br/><br>FAIL: b8-98> b7-98<br/>                                                                                                                                                                                                                                                                                       |
| PhosphoTyrosine transition present     | 0/0          | 0 of 0 phosphotyrosine transitions were found.                                                                                                                                                                                                                                                                                                                                                                                                                                                                                                                                                                                                                         |
| Six of top ten ions identified         | 5/6          | ion 1 (mass: 612.406: intensity: 12593.74)<br>assigned 1 times<br>ion 2 (mass: 637.913: intensity: 6753.57)<br>assigned 0 times<br>ion 3 (mass: 685.955: intensity: 5102.75)<br>assigned 1 times<br>ion 4 (mass: 686.882: intensity: 4040.84)<br>assigned 0 times<br>ion 5 (mass: 683.893: intensity: 2065.33)<br>assigned 0 times<br>ion 6 (mass: 932.302: intensity: 1398.82)<br>assigned 1 times<br>ion 7 (mass: 831.313: intensity: 1387.68)<br>assigned 0 times<br>ion 8 (mass: 563.789: intensity: 1107.78)<br>assigned 2 times<br>ion 9 (mass: 674.350: intensity: 858.87)<br>assigned 0 times<br>ion 10 (mass: 931.461: intensity: 825.06)<br>assigned 1 times |

## Ion Table

20 ions assigned of 45 ions above threshold (44%).

### N-terminal ions

| AA | N-ion | b       | b*      | b-98    | bo      |
|----|-------|---------|---------|---------|---------|
| s  | 1     | 168.006 | 150.979 | 70.020  | 149.995 |
| P  | 2     | 265.058 | 248.032 | 167.073 | 247.048 |



|   |    |                                                                  |          |                              |                           |
|---|----|------------------------------------------------------------------|----------|------------------------------|---------------------------|
| P | 3  | 362.111                                                          | 345.085  | 264.125<br>264.229 (2)       | 344.101                   |
| C | 4  | 522.142                                                          | 505.115  | 424.156                      | 504.131                   |
| S | 5  | 609.174                                                          | 592.147  | 511.188                      | 591.163                   |
| P | 6  | 706.227                                                          | 689.200  | 608.241                      | 688.216                   |
| R | 7  | 862.328<br>862.697 (2)<br>*432.255 [2+] (1)<br>*431.207 [2+] (3) | 845.301  | 764.342<br>*764.527 (1)      | 844.317                   |
| P | 8  | 959.381                                                          | 942.354  | 861.395<br>*431.207 [2+] (3) | 941.370                   |
| A | 9  | 1030.418                                                         | 1013.391 | 932.432<br>932.302 (11)      | 1012.407<br>*1012.428 (1) |
| S | 10 | 1117.450                                                         | 1100.423 | 1019.464                     | 1099.439                  |
| V | 11 | 1216.518                                                         | 1199.492 | 1118.532<br>1118.437 (2)     | 1198.508                  |
| R | 12 | -                                                                | -        | -                            | -                         |

### C-terminal ions

| AA | C-ion | y                              | y*                        | yo                      |
|----|-------|--------------------------------|---------------------------|-------------------------|
| s  | 12    | -                              | -                         | -                       |
| P  | 11    | 1223.631<br>612.406 [2+] (100) | 1206.605                  | 1205.621                |
| P  | 10    | 1126.579<br>*563.789 [2+] (8)  | 1109.552<br>*1109.561 (2) | 1108.568                |
| C  | 9     | 1029.526                       | 1012.499<br>*1012.428 (1) | 1011.515                |
| S  | 8     | 869.495                        | 852.469                   | 851.485                 |
| P  | 7     | 782.463                        | 765.437<br>*765.277 (1)   | 764.453<br>*764.527 (1) |
| R  | 6     | 685.410<br>685.955 (40)        | 668.384                   | 667.400                 |
| P  | 5     | 529.309<br>*529.239 (2)        | 512.283                   | 511.299                 |
| A  | 4     | 432.257<br>*432.255 (1)        | 415.230                   | 414.246                 |
| S  | 3     | 361.219                        | 344.193                   | 343.209                 |
| V  | 2     | 274.187                        | 257.161                   | 256.177                 |
| R  | 1     | 175.119                        | 158.092                   | 157.108                 |

### Ion distribution

| Threshold | Ion count | Matches | % matched |
|-----------|-----------|---------|-----------|
| 0         | 72        | 24      | 33        |
| 0.5       | 57        | 22      | 38        |
| 1         | 45        | 20      | 44        |
| 2         | 28        | 13      | 46        |
| 3         | 18        | 8       | 44        |
| 4         | 12        | 5       | 41        |
| 5         | 12        | 5       | 41        |
| 10        | 7         | 3       | 42        |

Observed ions > 1%

| m/z      | Intensity             | % max | Assignment (delta)                    |
|----------|-----------------------|-------|---------------------------------------|
| 232.212  | 173.70 <sub>3</sub>   | 1.37  |                                       |
| 264.229  | 276.24 <sub>3</sub>   | 2.19  | b3-98 (0.10)                          |
| 303.236  | 219.88 <sub>3</sub>   | 1.74  |                                       |
| 431.207  | 439.67 <sub>3</sub>   | 3.49  | b8-98[2+] (0.00) : b7[2+] (-0.46)     |
| 432.255  | 202.78 <sub>3</sub>   | 1.61  | b7[2+] (0.58) : y4 (-0.00)            |
| 440.179  | 153.08 <sub>3</sub>   | 1.21  | c7[2+] (-0.00)                        |
| 457.062  | 138.51 <sub>3</sub>   | 1.09  | a8o[2+] (-0.12)                       |
| 458.277  | 139.96 <sub>3</sub>   | 1.11  | a8*[2+] (0.59)                        |
| 529.239  | 296.87 <sub>3</sub>   | 2.35  | x9[2+] (-0.02) : y5 (-0.07)           |
| 540.212  | 393.92 <sub>3</sub>   | 3.12  |                                       |
| 546.230  | 465.65 <sub>3</sub>   | 3.69  |                                       |
| 547.245  | 289.28 <sub>3</sub>   | 2.29  |                                       |
| 563.789  | 1107.78 <sub>3</sub>  | 8.79  | y10[2+] (-0.00) : a5* (-0.36)         |
| 566.068  | 289.45 <sub>3</sub>   | 2.29  |                                       |
| 612.406  | 12593.74 <sub>3</sub> | 100   | y11[2+] (0.08)                        |
| 637.913  | 6753.57 <sub>3</sub>  | 53.62 |                                       |
| 674.350  | 858.87 <sub>3</sub>   | 6.81  |                                       |
| 683.893  | 2065.33 <sub>3</sub>  | 16.39 |                                       |
| 685.955  | 5102.75 <sub>3</sub>  | 40.51 | y6 (0.54)                             |
| 686.882  | 4040.84 <sub>3</sub>  | 32.08 |                                       |
| 714.438  | 144.00 <sub>3</sub>   | 1.14  |                                       |
| 715.400  | 155.06 <sub>3</sub>   | 1.23  |                                       |
| 747.376  | 192.43 <sub>3</sub>   | 1.52  |                                       |
| 764.527  | 229.59 <sub>3</sub>   | 1.82  | b7-98 (0.18) : y7o (0.07)             |
| 765.277  | 145.42 <sub>3</sub>   | 1.15  | z7 (-0.16) : y7* (-0.16)              |
| 773.368  | 303.06 <sub>3</sub>   | 2.40  |                                       |
| 810.627  | 422.27 <sub>3</sub>   | 3.35  | x7 (0.16)                             |
| 830.229  | 779.03 <sub>3</sub>   | 6.18  |                                       |
| 831.313  | 1387.68 <sub>3</sub>  | 11.01 |                                       |
| 842.348  | 180.56 <sub>3</sub>   | 1.43  |                                       |
| 843.378  | 185.55 <sub>3</sub>   | 1.47  |                                       |
| 862.697  | 328.49 <sub>3</sub>   | 2.60  | b7 (0.36)                             |
| 915.736  | 154.12 <sub>3</sub>   | 1.22  |                                       |
| 931.461  | 825.06 <sub>3</sub>   | 6.55  | a8 (0.07)                             |
| 932.302  | 1398.82 <sub>3</sub>  | 11.10 | b9-98 (-0.13)                         |
| 933.490  | 490.58 <sub>3</sub>   | 3.89  |                                       |
| 957.314  | 187.14 <sub>3</sub>   | 1.48  |                                       |
| 958.396  | 281.50 <sub>3</sub>   | 2.23  |                                       |
| 1002.455 | 438.58 <sub>3</sub>   | 3.48  | a9 (0.03)                             |
| 1003.493 | 757.91 <sub>3</sub>   | 6.01  |                                       |
| 1004.319 | 281.95 <sub>3</sub>   | 2.23  |                                       |
| 1012.428 | 141.37 <sub>3</sub>   | 1.12  | b9o (0.02) : y9* (-0.07) : z9 (-0.07) |

|          |                     |      |                          |
|----------|---------------------|------|--------------------------|
| 1109.561 | 261.04 <sub>3</sub> | 2.07 | y10* (0.00) : z10 (0.00) |
| 1118.437 | 274.69 <sub>3</sub> | 2.18 | b11-98 (-0.09)           |
| 1157.203 | 142.73 <sub>3</sub> | 1.13 |                          |

S2119

# ProPhosSI MS/MS report

Mass: 1091.50048828125 Charge: 5+

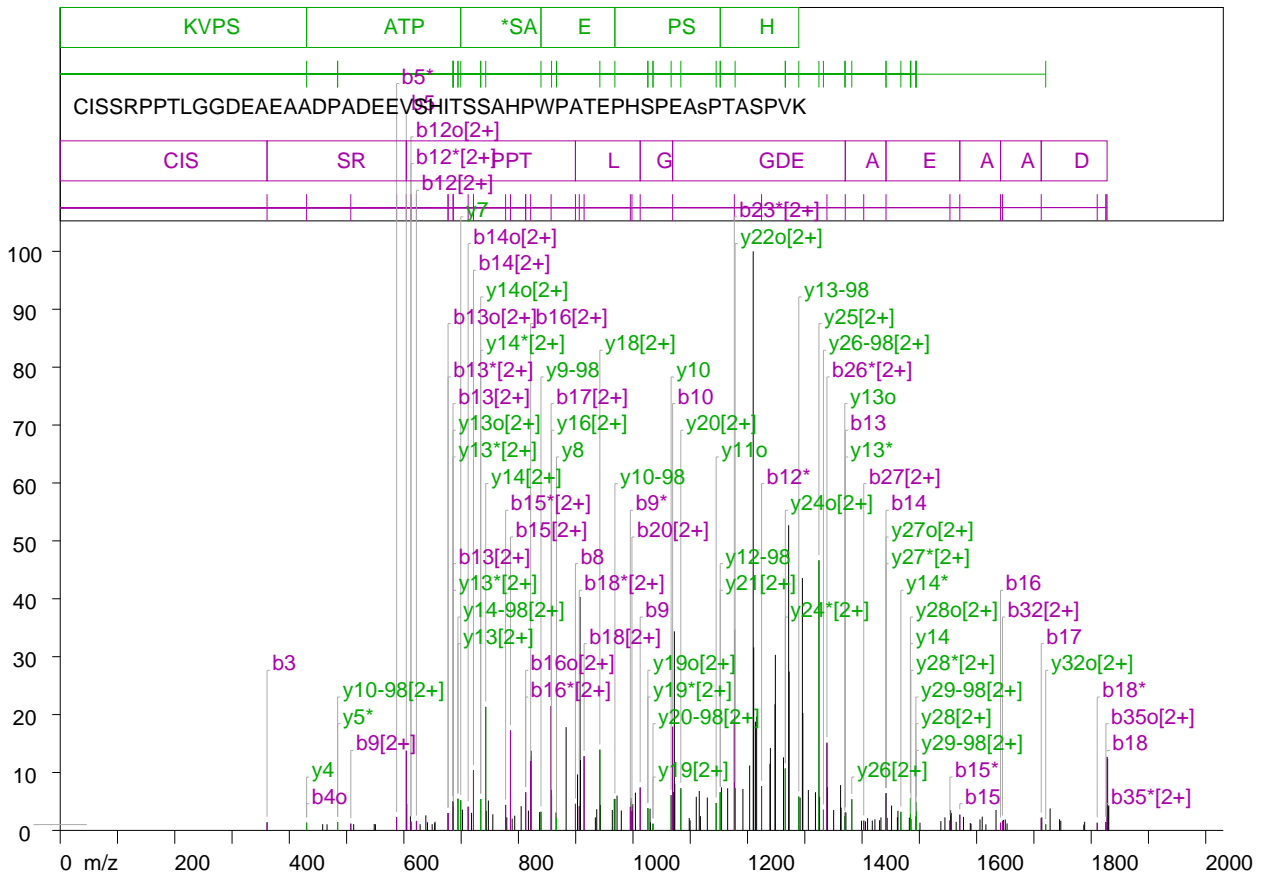

C I S S R P P T L G G D E

A E A A D P A D E E V S H I T S S A H P W P A T E

P H S P E A S P T A S P V K

## Cav3.2 Rat

(24) 2075 CISSRPPTLGGDEAEAADPADEEVSHITSSAHPWPATEPHSPEAsPTASPVK 2126 5452.446  
(0.0163) Da

|                         |     |
|-------------------------|-----|
| Parent Ion              | m/z |
| No parent ions observed |     |

## Modifications and supporting evidence

| Position | Residue ID | Modification | Evidence   |
|----------|------------|--------------|------------|
| 45       | (2119)     | Phospho (ST) | y7=>y10-98 |

## Spectrum interpretation

| Rule                                   | passed/tests | Description                                                                                                                                                                                                                                                                                                                                                                                                                                                                                                                                                                                                                                                                                                                                                      |
|----------------------------------------|--------------|------------------------------------------------------------------------------------------------------------------------------------------------------------------------------------------------------------------------------------------------------------------------------------------------------------------------------------------------------------------------------------------------------------------------------------------------------------------------------------------------------------------------------------------------------------------------------------------------------------------------------------------------------------------------------------------------------------------------------------------------------------------|
| Parent ions present                    | 0/1          | Parent ions corresponding to the parent fragment - 1 phosphate ions were not found                                                                                                                                                                                                                                                                                                                                                                                                                                                                                                                                                                                                                                                                               |
| Three -98 Ions present                 | 1/1          | 8 des-phospho fragment ions were found.                                                                                                                                                                                                                                                                                                                                                                                                                                                                                                                                                                                                                                                                                                                          |
| Unique -98 transitions present         | 1/1          | transition y7 to y10-98 support<br>unique phosphorylation at position<br>45                                                                                                                                                                                                                                                                                                                                                                                                                                                                                                                                                                                                                                                                                      |
| Four Sequential b or y ions            | 1/1          | <br/><br>Sequence of four b ions found from b12 to b15.                                                                                                                                                                                                                                                                                                                                                                                                                                                                                                                                                                                                                                                                                                          |
| Five of six sequential ions present    | 1/1          | Five of Six ions found between b8 and b13<br>Five of Six ions found between b9 and b14<br>Five of Six ions found between b10 and b15<br>Five of Six ions found between b11 and b16<br>Five of Six ions found between b12 and b17<br>Five of Six ions found between b13 and b18<br>Five of Six ions found between b14 and b19<br>Five of Six ions found between b15 and b20<br>Five of Six ions found between y9 and y14                                                                                                                                                                                                                                                                                                                                          |
| Proline directed fragmentation pattern | 5/7          | No proline ions at y47-98<br>PASS: b6< b5<br/><br>NOTE: P-P is a low abundance fragmentation.<br>No proline ions at y46-98<br>No proline ions at b7<br/><br>No proline ions at y34-98<br>PASS: b19< b18<br/><br>PASS: y20-98> y19-98<br/><br>PASS: b33< b32<br/><br>NOTE: W-P is a low abundance fragmentation.<br>No proline ions at y18-98<br>No proline ions at b35<br/><br>FAIL: y14-98< y13-98<br/>No proline ions at<br>b39<br/><br>NOTE: S-P is a low abundance fragmentation.<br>FAIL: y11-98< y10-98<br/>No proline ions at<br>b42<br/><br>NOTE: S-P is a low abundance fragmentation.<br>PASS: y7> y6<br/><br>No proline ions at b46-98<br/><br>NOTE: S-P is a low abundance fragmentation.<br>No proline ions at y3<br>No proline ions at b50-98<br/> |
| PhosphoTyrosine transition present     | 0/0          | 0 of 0 phosphotyrosine transitions were found.                                                                                                                                                                                                                                                                                                                                                                                                                                                                                                                                                                                                                                                                                                                   |
| Six of top ten ions identified         | 2/6          | ion 1 (mass: 1209.892456: intensity:<br>9818.9296875) assigned 0 times<br>ion 2 (mass: 1271.776001: intensity:<br>5174.6440429688) assigned 0 times<br>ion 3 (mass: 1324.643677: intensity:<br>4580.1337890625) assigned 3 times<br>ion 4 (mass: 1295.761353: intensity:<br>4278.0874023438) assigned 0 times<br>ion 5 (mass: 907.5992432: intensity:<br>3958.3454589844) assigned 1 times<br>ion 6 (mass: 1177.567017: intensity:                                                                                                                                                                                                                                                                                                                               |

|   |   |                                                                                                                                                                                                                                                                                                                                                       |
|---|---|-------------------------------------------------------------------------------------------------------------------------------------------------------------------------------------------------------------------------------------------------------------------------------------------------------------------------------------------------------|
| - | - | 3407.2993164063) assigned 0 times<br>ion 7 (mass: 1072.227173: intensity:<br>3375.662109375) assigned 0 times<br>ion 8 (mass: 1210.736206: intensity:<br>3101.2966308594) assigned 0 times<br>ion 9 (mass: 1248.584351: intensity:<br>2976.8547363281) assigned 0 times<br>ion 10 (mass: 1272.617554: intensity:<br>2693.1457519531) assigned 0 times |
|---|---|-------------------------------------------------------------------------------------------------------------------------------------------------------------------------------------------------------------------------------------------------------------------------------------------------------------------------------------------------------|

## Ion Table

85 ions assigned of 182 ions above threshold (46%).

N-terminal ions

| AA | N-ion | b                                                                              | b*                                                   | b-98 | bo                                |
|----|-------|--------------------------------------------------------------------------------|------------------------------------------------------|------|-----------------------------------|
| C  | 1     | 161.038                                                                        | 144.011                                              | -    | 143.027                           |
| I  | 2     | 274.122                                                                        | 257.095                                              | -    | 256.111                           |
| S  | 3     | 361.154<br>361.1133118 (1)                                                     | 344.128                                              | -    | 343.144                           |
| S  | 4     | 448.186                                                                        | 431.160                                              | -    | 430.176<br>*430.1480713 (1)       |
| R  | 5     | 604.287<br>604.2109375 (13)                                                    | 587.261<br>587.305481 (2)                            | -    | 586.277                           |
| P  | 6     | 701.340                                                                        | 684.313                                              | -    | 683.329                           |
| P  | 7     | 798.393                                                                        | 781.366                                              | -    | 780.382                           |
| T  | 8     | 899.440<br>899.5310059 (4)                                                     | 882.414                                              | -    | 881.430                           |
| L  | 9     | 1012.525<br>507.3081665 [2+] (1)<br>1012.576172 (7)                            | 995.498<br>995.4127197 (4)                           | -    | 994.514                           |
| G  | 10    | 1069.546<br>1069.226196 (17)                                                   | 1052.519                                             | -    | 1051.535                          |
| G  | 11    | 1126.567                                                                       | 1109.541                                             | -    | 1108.557                          |
| D  | 12    | 1241.594<br>*621.8565674 [2+] (1)                                              | 1224.568<br>1224.542725 (7)<br>*612.3520508 [2+] (1) | -    | 1223.584<br>*612.3520508 [2+] (1) |
| E  | 13    | 1370.637<br>*685.7800293 [2+] (5)<br>*1370.648438 (3)<br>*686.3863525 [2+] (4) | 1353.610<br>*677.1717529 [2+] (2)                    | -    | 1352.626<br>*677.1717529 [2+] (2) |
| A  | 14    | 1441.674<br>*1441.739502 (6)<br>721.4846191 [2+] (10)                          | 1424.648                                             | -    | 1423.664<br>712.2225342 [2+] (4)  |
| E  | 15    | 1570.717<br>786.0649414 [2+] (17)<br>1570.626831 (2)                           | 1553.690<br>777.6696777 [2+] (4)<br>*1553.406006 (1) | -    | 1552.706                          |
| A  | 16    | 1641.754<br>*1641.730103 (1)<br>*821.3361816 [2+] (11)                         | 1624.727<br>*812.5979004 [2+] (6)                    | -    | 1623.743<br>*812.5979004 [2+] (6) |
| A  | 17    | 1712.791<br>1712.812134 (2)<br>857.0291748 [2+] (21)                           | 1695.764                                             | -    | 1694.780                          |
| D  | 18    | 1827.818<br>914.6485596 [2+] (12)<br>*1827.761841 (12)                         | 1810.791<br>1810.521606 (1)<br>906.2084961 [2+] (4)  | -    | 1809.807                          |
| P  | 19    | 1924.871                                                                       | 1907.844                                             | -    | 1906.860                          |
| A  | 20    | 1995.908<br>998.2147217 [2+] (3)                                               | 1978.881                                             | -    | 1977.897                          |
| D  | 21    | 2110.935                                                                       | 2093.908                                             | -    | 2092.924                          |
| E  | 22    | 2239.977                                                                       | 2222.951                                             | -    | 2221.967                          |
| E  | 23    | 2369.020                                                                       | 2351.993<br>1176.905151 [2+] (18)                    | -    | 2351.009                          |

|   |    |                                  |                                    |          |                                   |
|---|----|----------------------------------|------------------------------------|----------|-----------------------------------|
| V | 24 | 2468.088                         | 2451.062                           | -        | 2450.078                          |
| S | 25 | 2555.120                         | 2538.094                           | -        | 2537.110                          |
| H | 26 | 2692.179                         | 2675.153<br>*1338.633179 [2+] (15) | -        | 2674.169                          |
| I | 27 | 2805.263<br>1402.893311 [2+] (1) | 2788.237                           | -        | 2787.253                          |
| T | 28 | 2906.311                         | 2889.285                           | -        | 2888.301                          |
| S | 29 | 2993.343                         | 2976.317                           | -        | 2975.333                          |
| S | 30 | 3080.375                         | 3063.349                           | -        | 3062.365                          |
| A | 31 | 3151.412                         | 3134.386                           | -        | 3133.402                          |
| H | 32 | 3288.471<br>1645.092773 [2+] (1) | 3271.445                           | -        | 3270.461                          |
| P | 33 | 3385.524                         | 3368.497                           | -        | 3367.513                          |
| W | 34 | 3571.603                         | 3554.577                           | -        | 3553.593                          |
| P | 35 | 3668.656                         | 3651.629<br>*1825.780029 [2+] (1)  | -        | 3650.645<br>*1825.780029 [2+] (1) |
| A | 36 | 3739.693                         | 3722.667                           | -        | 3721.683                          |
| T | 37 | 3840.741                         | 3823.714                           | -        | 3822.730                          |
| E | 38 | 3969.783                         | 3952.757                           | -        | 3951.773                          |
| P | 39 | 4066.836                         | 4049.810                           | -        | 4048.826                          |
| H | 40 | 4203.895                         | 4186.869                           | -        | 4185.885                          |
| S | 41 | 4290.927                         | 4273.901                           | -        | 4272.917                          |
| P | 42 | 4387.980                         | 4370.953                           | -        | 4369.969                          |
| E | 43 | 4517.022                         | 4499.996                           | -        | 4499.012                          |
| A | 44 | 4588.060                         | 4571.033                           | -        | 4570.049                          |
| s | 45 | 4755.058                         | 4738.031                           | 4657.072 | 4737.047                          |
| P | 46 | 4852.111                         | 4835.084                           | 4754.125 | 4834.100                          |
| T | 47 | 4953.158                         | 4936.132                           | 4855.172 | 4935.148                          |
| A | 48 | 5024.196                         | 5007.169                           | 4926.210 | 5006.185                          |
| S | 49 | 5111.228                         | 5094.201                           | 5013.242 | 5093.217                          |
| P | 50 | 5208.280                         | 5191.254                           | 5110.294 | 5190.270                          |
| V | 51 | 5307.349                         | 5290.322                           | 5209.363 | 5289.338                          |
| K | 52 | -                                | -                                  | -        | -                                 |

### C-terminal ions

| AA | C-ion | y        | y*       | y-98     | yo       |
|----|-------|----------|----------|----------|----------|
| C  | 52    | -        | -        | -        | -        |
| I  | 51    | 5293.424 | 5276.397 | 5195.438 | 5275.413 |
| S  | 50    | 5180.340 | 5163.313 | 5082.354 | 5162.329 |
| S  | 49    | 5093.308 | 5076.281 | 4995.322 | 5075.297 |
| R  | 48    | 5006.275 | 4989.249 | 4908.290 | 4988.265 |
| P  | 47    | 4850.174 | 4833.148 | 4752.188 | 4832.164 |
| P  | 46    | 4753.122 | 4736.095 | 4655.136 | 4735.111 |
| T  | 45    | 4656.069 | 4639.042 | 4558.083 | 4638.058 |
| L  | 44    | 4555.021 | 4537.995 | 4457.035 | 4537.011 |
| G  | 43    | 4441.937 | 4424.911 | 4343.951 | 4423.927 |
| G  | 42    | 4384.916 | 4367.889 | 4286.930 | 4366.905 |



|   |    |                                                       |                                                                                |                                                           |                                                      |
|---|----|-------------------------------------------------------|--------------------------------------------------------------------------------|-----------------------------------------------------------|------------------------------------------------------|
| D | 41 | 4327.894                                              | 4310.868                                                                       | 4229.908                                                  | 4309.884                                             |
| E | 40 | 4212.867                                              | 4195.841                                                                       | 4114.881                                                  | 4194.857                                             |
| A | 39 | 4083.825                                              | 4066.798                                                                       | 3985.839                                                  | 4065.814                                             |
| E | 38 | 4012.787                                              | 3995.761                                                                       | 3914.802                                                  | 3994.777                                             |
| A | 37 | 3883.745                                              | 3866.718                                                                       | 3785.759                                                  | 3865.734                                             |
| A | 36 | 3812.708                                              | 3795.681                                                                       | 3714.722                                                  | 3794.697                                             |
| D | 35 | 3741.671                                              | 3724.644                                                                       | 3643.685                                                  | 3723.660                                             |
| P | 34 | 3626.644                                              | 3609.617                                                                       | 3528.658                                                  | 3608.633                                             |
| A | 33 | 3529.591                                              | 3512.564                                                                       | 3431.605                                                  | 3511.580                                             |
| D | 32 | 3458.554                                              | 3441.527                                                                       | 3360.568                                                  | 3440.543<br>1720.633911 [2+] (1)                     |
| E | 31 | 3343.527                                              | 3326.500                                                                       | 3245.541                                                  | 3325.516                                             |
| E | 30 | 3214.484                                              | 3197.458                                                                       | 3116.498                                                  | 3196.474                                             |
| V | 29 | 3085.442                                              | 3068.415                                                                       | 2987.456<br>*1493.928223 [2+] (2)<br>1494.623413 [2+] (4) | 3067.431                                             |
| S | 28 | 2986.373<br>*1493.928223 [2+] (2)                     | 2969.347<br>*1485.303345 [2+] (1)                                              | 2888.387                                                  | 2968.363<br>*1484.415405 [2+] (5)                    |
| H | 27 | 2899.341                                              | 2882.315<br>*1441.739502 [2+] (6)                                              | 2801.355                                                  | 2881.331<br>*1441.739502 [2+] (6)                    |
| I | 26 | 2762.282<br>1381.997803 [2+] (5)                      | 2745.256                                                                       | 2664.296<br>*1332.531372 [2+] (3)                         | 2744.272                                             |
| T | 25 | 2649.198<br>*1324.643677 [2+] (46)                    | 2632.172                                                                       | 2551.212                                                  | 2631.188                                             |
| S | 24 | 2548.151                                              | 2531.124<br>*1265.977661 [2+] (10)                                             | 2450.165                                                  | 2530.140<br>*1265.977661 [2+] (10)                   |
| S | 23 | 2461.118                                              | 2444.092                                                                       | 2363.133                                                  | 2443.108                                             |
| A | 22 | 2374.086                                              | 2357.060                                                                       | 2276.101                                                  | 2356.076<br>1178.309814 [2+] (7)                     |
| H | 21 | 2303.049<br>*1152.33728 [2+] (6)                      | 2286.023                                                                       | 2205.063                                                  | 2285.039                                             |
| P | 20 | 2165.990<br>1083.528809 [2+] (7)                      | 2148.964                                                                       | 2068.005<br>*1034.937012 [2+] (1)                         | 2147.980                                             |
| W | 19 | 2068.938<br>*1034.937012 [2+] (1)                     | 2051.911<br>*1026.021362 [2+] (3)                                              | 1970.952                                                  | 2050.927<br>*1026.021362 [2+] (3)                    |
| P | 18 | 1882.858<br>942.1848145 [2+] (13)                     | 1865.832                                                                       | 1784.872                                                  | 1864.848                                             |
| A | 17 | 1785.806                                              | 1768.779                                                                       | 1687.820                                                  | 1767.795                                             |
| T | 16 | 1714.768<br>857.8365479 [2+] (6)                      | 1697.742                                                                       | 1616.783                                                  | 1696.758                                             |
| E | 15 | 1613.721                                              | 1596.694                                                                       | 1515.735                                                  | 1595.710                                             |
| P | 14 | 1484.678<br>742.9121094 [2+] (21)<br>*1484.415405 (5) | 1467.652<br>*1467.718872 (3)<br>*734.1431885 [2+] (5)                          | 1386.692<br>*694.3746338 [2+] (5)                         | 1466.668<br>*734.1431885 [2+] (5)                    |
| H | 13 | 1387.625<br>*694.3746338 [2+] (5)                     | 1370.599<br>*685.7800293 [2+] (5)<br>*1370.648438 (3)<br>*686.3863525 [2+] (4) | 1289.640<br>1289.494995 (5)                               | 1369.615<br>*685.7800293 [2+] (5)<br>1369.776855 (2) |
| S | 12 | 1250.566                                              | 1233.540                                                                       | 1152.581<br>*1152.33728 (6)                               | 1232.556                                             |
| P | 11 | 1163.534                                              | 1146.508                                                                       | 1065.549                                                  | 1145.524<br>1145.191895 (4)                          |
| E | 10 | 1066.482<br>1066.603516 (6)                           | 1049.455                                                                       | 968.496<br>*484.3243408 [2+] (1)<br>968.4006348 (5)       | 1048.471                                             |
| A | 9  | 937.439                                               | 920.413                                                                        | 839.453<br>839.3673096 (3)                                | 919.429                                              |
| s | 8  | 866.402                                               | 849.375                                                                        | 768.416                                                   | 848.391                                              |

|   |   |                             |                             |   |         |
|---|---|-----------------------------|-----------------------------|---|---------|
| - | - | 866.4445801 (2)             | -                           | - | -       |
| P | 7 | 699.404<br>*699.2799072 (5) | 682.377                     | - | 681.393 |
| T | 6 | 602.351                     | 585.324                     | - | 584.340 |
| A | 5 | 501.303                     | 484.277<br>*484.3243408 (1) | - | 483.293 |
| S | 4 | 430.266<br>*430.1480713 (1) | 413.240                     | - | 412.256 |
| P | 3 | 343.234                     | 326.208                     | - | 325.223 |
| V | 2 | 246.181                     | 229.155                     | - | 228.171 |
| K | 1 | 147.113                     | 130.086                     | - | 129.102 |

### Ion distribution

| Threshold | Ion count | Matches | % matched |
|-----------|-----------|---------|-----------|
| 0         | 225       | 101     | 44        |
| 0.5       | 212       | 97      | 45        |
| 1         | 182       | 85      | 46        |
| 2         | 136       | 64      | 47        |
| 3         | 111       | 55      | 49        |
| 4         | 87        | 45      | 51        |
| 5         | 72        | 37      | 51        |
| 10        | 35        | 16      | 45        |

### Observed ions > 1%

| m/z         | Intensity                    | % max | Assignment (delta)                                                            |
|-------------|------------------------------|-------|-------------------------------------------------------------------------------|
| 361.1133118 | 138.555267334 <sub>s</sub>   | 1.41  | b3 (-0.04)                                                                    |
| 430.1480713 | 129.8214263916 <sub>s</sub>  | 1.32  | b4o (-0.02) : y4 (-0.11)                                                      |
| 458.2215576 | 105.7660522461 <sub>s</sub>  | 1.07  | x4 (-0.03) : c8[2+] (-0.51)                                                   |
| 465.8394775 | 103.6264343262 <sub>s</sub>  | 1.05  |                                                                               |
| 484.3243408 | 140.0223999023 <sub>s</sub>  | 1.42  | a9o[2+] (0.56) : a9*[2+] (0.06) : y5* (0.04) : z5 (0.04) : y10-98[2+] (-0.42) |
| 507.3081665 | 114.9241867065 <sub>s</sub>  | 1.17  | b9[2+] (0.54)                                                                 |
| 512.3604736 | 106.4180297852 <sub>s</sub>  | 1.08  | a10o[2+] (0.08) : a10*[2+] (-0.40)                                            |
| 548.2194824 | 108.5081939697 <sub>s</sub>  | 1.10  | x10[2+] (0.47)                                                                |
| 550.3096924 | 104.3839492798 <sub>s</sub>  | 1.06  | a11[2+] (0.51)                                                                |
| 587.305481  | 223.5336914063 <sub>s</sub>  | 2.27  | b5* (0.04)                                                                    |
| 604.2109375 | 1352.0979003906 <sub>s</sub> | 13.77 | b5 (-0.07)                                                                    |
| 605.1126709 | 450.9348754883 <sub>s</sub>  | 4.59  |                                                                               |
| 611.3813477 | 242.2004241943 <sub>s</sub>  | 2.46  |                                                                               |
| 612.3520508 | 148.3235321045 <sub>s</sub>  | 1.51  | b12o[2+] (0.05) : b12*[2+] (-0.43)                                            |
| 621.8565674 | 160.6429290771 <sub>s</sub>  | 1.63  | b12[2+] (0.55) : c5 (0.54)                                                    |
| 628.3331299 | 105.7133178711 <sub>s</sub>  | 1.07  |                                                                               |
| 638.3607178 | 255.646697998 <sub>s</sub>   | 2.60  |                                                                               |
| 641.204834  | 137.0092163086 <sub>s</sub>  | 1.39  |                                                                               |

|             |                 |       |                                                                        |
|-------------|-----------------|-------|------------------------------------------------------------------------|
| 649.3989258 | 105.1747970581  | 1.07  |                                                                        |
| 653.7832031 | 122.3015518188  | 1.24  |                                                                        |
| 654.3859863 | 146.4954528809  | 1.49  |                                                                        |
| 677.1717529 | 294.1917724609  | 2.99  | b13o[2+] (0.35) : b13*[2+] (-0.13)                                     |
| 685.7800293 | 496.3411254883  | 5.05  | y13o[2+] (0.46) : y13*[2+] (-0.02) : z13[2+] (-0.02) : b13[2+] (-0.04) |
| 686.3863525 | 399.6311340332  | 4.07  | y13*[2+] (0.58) : z13[2+] (0.58) : b13[2+] (0.56)                      |
| 694.3746338 | 536.2106933594  | 5.46  | y14-98[2+] (0.52) : y13[2+] (0.05) : c13[2+] (0.03)                    |
| 699.2799072 | 511.2979431152  | 5.20  | a14*[2+] (0.44) : y7 (-0.12)                                           |
| 702.4587402 | 351.6727294922  | 3.58  |                                                                        |
| 712.2225342 | 401.9743652344  | 4.09  | b14o[2+] (-0.11)                                                       |
| 718.1921997 | 297.7267456055  | 3.03  | c6 (-0.17)                                                             |
| 721.4846191 | 1018.450378418  | 10.37 | b14[2+] (0.14)                                                         |
| 734.1431885 | 532.5216064453  | 5.42  | y14o[2+] (0.30) : y14*[2+] (-0.18) : z14[2+] (-0.18)                   |
| 742.9121094 | 2094.4167480469 | 21.33 | y14[2+] (0.06)                                                         |
| 743.7774048 | 328.7305297852  | 3.34  |                                                                        |
| 747.5275879 | 505.7481689453  | 5.15  |                                                                        |
| 755.3076172 | 272.8651123047  | 2.77  |                                                                        |
| 777.6696777 | 432.0924072266  | 4.40  | b15*[2+] (0.32)                                                        |
| 779.6470947 | 221.0176696777  | 2.25  |                                                                        |
| 786.0649414 | 1694.6021728516 | 17.25 | b15[2+] (0.20)                                                         |
| 789.0546875 | 198.2128295898  | 2.01  |                                                                        |
| 793.505249  | 249.6879730225  | 2.54  |                                                                        |
| 804.7298584 | 411.4122619629  | 4.18  |                                                                        |
| 812.5979004 | 645.4207763672  | 6.57  | b16o[2+] (0.22) : b16*[2+] (-0.26)                                     |
| 817.4036865 | 335.5430908203  | 3.41  |                                                                        |
| 821.3361816 | 1171.9975585938 | 11.93 | x15[2+] (-0.02) : b16[2+] (-0.04)                                      |
| 822.0661621 | 1350.3876953125 | 13.75 |                                                                        |
| 837.0234375 | 310.993560791   | 3.16  |                                                                        |
| 839.3673096 | 316.7310180664  | 3.22  | y9-98 (-0.08)                                                          |
| 857.0291748 | 2108.1625976563 | 21.47 | b17[2+] (0.12)                                                         |
| 857.8365479 | 597.6917114258  | 6.08  | y16[2+] (-0.05)                                                        |
| 865.6567383 | 305.4468383789  | 3.11  | c17[2+] (0.24)                                                         |
| 866.4445801 | 210.2418518066  | 2.14  | y8 (0.04)                                                              |
| 883.2617188 | 1751.2679443359 | 17.83 |                                                                        |
| 899.5310059 | 450.5983276367  | 4.58  | b8 (0.09)                                                              |
| 903.1656494 | 949.116027832   | 9.66  |                                                                        |
| 906.2084961 | 411.4477233887  | 4.19  | b18*[2+] (0.30)                                                        |
| 907.5992432 | 3958.3454589844 | 40.31 | x17[2+] (0.19)                                                         |
| 908.3806152 | 1194.1361083984 | 12.16 |                                                                        |
| 914.6485596 | 1258.2122802734 | 12.81 | b18[2+] (0.23)                                                         |
| 934.3498535 | 220.0716400146  | 2.24  |                                                                        |
| 936.7435303 | 359.2721862793  | 3.65  |                                                                        |

|             |                  |       |                                                      |
|-------------|------------------|-------|------------------------------------------------------|
| 942.1848145 | 1369.0399169922, | 13.94 | y18[2+] (0.25)                                       |
| 943.0025635 | 432.1035461426,  | 4.40  |                                                      |
| 963.9055176 | 345.8616333008,  | 3.52  |                                                      |
| 967.3334961 | 532.8014526367,  | 5.42  | a9* (-0.17)                                          |
| 968.4006348 | 533.923828125,   | 5.43  | y10-98 (-0.09)                                       |
| 972.1739502 | 590.0267333984,  | 6.00  |                                                      |
| 979.6156006 | 337.1735839844,  | 3.43  |                                                      |
| 995.4127197 | 397.9575500488,  | 4.05  | b9* (-0.08)                                          |
| 996.5449219 | 549.4752197266,  | 5.59  |                                                      |
| 998.2147217 | 328.8882141113,  | 3.34  | b20[2+] (-0.24)                                      |
| 999.6484375 | 448.4721069336,  | 4.56  |                                                      |
| 1004.272339 | 640.5797729492,  | 6.52  |                                                      |
| 1012.576172 | 727.9852905273,  | 7.41  | b9 (0.05)                                            |
| 1026.021362 | 376.702545166,   | 3.83  | y19o[2+] (0.05) : y19*[2+] (-0.43) : z19[2+] (-0.43) |
| 1029.77356  | 368.2742004395,  | 3.75  | c9 (0.22)                                            |
| 1030.486206 | 137.4447021484,  | 1.39  |                                                      |
| 1034.937012 | 113.0552749634,  | 1.15  | y20-98[2+] (0.43) : y19[2+] (-0.03)                  |
| 1066.603516 | 596.5753173828,  | 6.07  | y10 (0.12)                                           |
| 1069.226196 | 1757.3813476563, | 17.89 | b10 (-0.32)                                          |
| 1070.341675 | 649.6806640625,  | 6.61  |                                                      |
| 1072.227173 | 3375.662109375,  | 34.37 |                                                      |
| 1072.965942 | 792.1672363281,  | 8.06  |                                                      |
| 1083.528809 | 714.7050170898,  | 7.27  | y20[2+] (0.02)                                       |
| 1098.247192 | 210.1286315918,  | 2.14  | a22*[2+] (0.26) : a11 (-0.32)                        |
| 1099.705688 | 169.2444915771,  | 1.72  |                                                      |
| 1110.528442 | 570.6713867188,  | 5.81  |                                                      |
| 1115.749756 | 668.5572509766,  | 6.80  |                                                      |
| 1117.745239 | 240.9336853027,  | 2.45  |                                                      |
| 1129.791016 | 556.1040039063,  | 5.66  |                                                      |
| 1145.191895 | 464.311126709,   | 4.72  | y11o (-0.33)                                         |
| 1152.33728  | 648.0306396484,  | 6.59  | y21[2+] (0.30) : y12-98 (-0.24)                      |
| 1154.368774 | 730.5165405273,  | 7.43  |                                                      |
| 1165.291138 | 714.1714477539,  | 7.27  |                                                      |
| 1176.905151 | 1860.9321289063, | 18.95 | b23*[2+] (0.40)                                      |
| 1177.567017 | 3407.2993164063, | 34.70 |                                                      |
| 1178.309814 | 718.361328125,   | 7.31  | y22o[2+] (-0.23)                                     |
| 1191.922119 | 702.1231079102,  | 7.15  | x11 (0.39)                                           |
| 1203.68811  | 1099.9345703125, | 11.20 |                                                      |
| 1209.892456 | 9818.9296875,    | 100   |                                                      |
| 1210.736206 | 3101.2966308594, | 31.58 |                                                      |
| 1213.744263 | 1843.29296875,   | 18.77 | a12 (0.14)                                           |
| 1215.905029 | 1929.0822753906, | 19.64 |                                                      |
| 1224.542725 | 752.2476806641,  | 7.66  | b12* (-0.02)                                         |

|             |                 |       |                                                                 |
|-------------|-----------------|-------|-----------------------------------------------------------------|
| 1239.191895 | 1129.4672851563 | 11.50 |                                                                 |
| 1239.935425 | 1399.734375     | 14.25 |                                                                 |
| 1247.978516 | 2138.8901367188 | 21.78 |                                                                 |
| 1248.584351 | 2976.8547363281 | 30.31 |                                                                 |
| 1262.780029 | 1239.3331298828 | 12.62 |                                                                 |
| 1265.977661 | 1049.5048828125 | 10.68 | y24o[2+] (0.40) : y24*[2+] (-0.08) : z24[2+] (-0.08)            |
| 1271.776001 | 5174.6440429688 | 52.70 |                                                                 |
| 1272.617554 | 2693.1457519531 | 27.42 |                                                                 |
| 1289.494995 | 573.7450561523  | 5.84  | y13-98 (-0.14)                                                  |
| 1291.833862 | 556.3817138672  | 5.66  |                                                                 |
| 1295.761353 | 4278.0874023438 | 43.56 |                                                                 |
| 1296.575073 | 1992.5168457031 | 20.29 |                                                                 |
| 1306.192871 | 683.9830932617  | 6.96  |                                                                 |
| 1318.606323 | 647.7965087891  | 6.59  |                                                                 |
| 1324.643677 | 4580.1337890625 | 46.64 | a26*[2+] (0.56) : a13o (0.01) : y25[2+] (-0.45)                 |
| 1325.796875 | 571.1207275391  | 5.81  | a13* (0.18)                                                     |
| 1332.531372 | 350.5002441406  | 3.56  | a26[2+] (-0.06) : y26-98[2+] (-0.12)                            |
| 1338.633179 | 1486.1683349609 | 15.13 | b26*[2+] (0.55) : x25[2+] (-0.46)                               |
| 1339.337158 | 732.259765625   | 7.45  | x25[2+] (0.23)                                                  |
| 1350.348999 | 344.8430786133  | 3.51  |                                                                 |
| 1362.456787 | 768.3057861328  | 7.82  |                                                                 |
| 1363.342896 | 384.5501403809  | 3.91  |                                                                 |
| 1369.776855 | 242.9897460938  | 2.47  | y13o (0.16)                                                     |
| 1370.648438 | 303.8651428223  | 3.09  | y13* (0.04) : z13 (0.04) : b13 (0.01)                           |
| 1371.776245 | 301.9590759277  | 3.07  |                                                                 |
| 1381.997803 | 527.8368530273  | 5.37  | y26[2+] (0.35)                                                  |
| 1398.952148 | 164.2594909668  | 1.67  |                                                                 |
| 1402.893311 | 165.7969055176  | 1.68  | b27[2+] (-0.24)                                                 |
| 1405.805664 | 153.5837097168  | 1.56  |                                                                 |
| 1409.614014 | 207.2634277344  | 2.11  |                                                                 |
| 1417.832642 | 167.074005127   | 1.70  |                                                                 |
| 1422.395264 | 187.7393493652  | 1.91  |                                                                 |
| 1430.589966 | 171.3184356689  | 1.74  | a28o[2+] (-0.06) : a28*[2+] (-0.55)                             |
| 1432.936523 | 220.3084106445  | 2.24  |                                                                 |
| 1441.739502 | 629.5108032227  | 6.41  | y27o[2+] (0.57) : y27*[2+] (0.07) : z27[2+] (0.07) : b14 (0.06) |
| 1443.75     | 213.0663909912  | 2.16  |                                                                 |
| 1451.446777 | 420.5224609375  | 4.28  |                                                                 |
| 1461.634644 | 222.4046630859  | 2.26  | c28[2+] (-0.53)                                                 |
| 1462.642944 | 332.0926513672  | 3.38  | c28[2+] (0.46)                                                  |
| 1467.718872 | 314.6182861328  | 3.20  | y14* (0.06) : z14 (0.06)                                        |
| 1482.513916 | 217.1944274902  | 2.21  |                                                                 |
| 1484.415405 | 545.8784179688  | 5.55  | y14 (-0.26) : y28o[2+] (-0.27)                                  |

|             |                  |       |                                                   |
|-------------|------------------|-------|---------------------------------------------------|
| 1485.303345 | 192.712097168,   | 1.96  | y28*[2+] (0.12) : z28[2+] (0.12)                  |
| 1493.928223 | 235.2500305176,  | 2.39  | y28[2+] (0.23) : y29-98[2+] (-0.30)               |
| 1494.623413 | 479.423034668,   | 4.88  | y29-98[2+] (0.39)                                 |
| 1501.106323 | 129.7427825928,  | 1.32  |                                                   |
| 1537.536133 | 158.3055267334,  | 1.61  |                                                   |
| 1544.635498 | 220.5159606934,  | 2.24  |                                                   |
| 1553.406006 | 166.8407440186,  | 1.69  | a31o[2+] (0.19) : b15* (-0.28) : a31*[2+] (-0.29) |
| 1554.606323 | 344.6879577637,  | 3.51  |                                                   |
| 1555.622559 | 295.6168518066,  | 3.01  |                                                   |
| 1564.294556 | 144.6536254883,  | 1.47  |                                                   |
| 1570.626831 | 267.148651123,   | 2.72  | b15 (-0.09)                                       |
| 1577.061523 | 229.0642700195,  | 2.33  |                                                   |
| 1588.927368 | 125.0332336426,  | 1.27  |                                                   |
| 1590.165894 | 112.3862228394,  | 1.14  |                                                   |
| 1605.868408 | 186.5545959473,  | 1.89  |                                                   |
| 1609.725586 | 232.9472045898,  | 2.37  |                                                   |
| 1616.163086 | 103.8276748657,  | 1.05  |                                                   |
| 1633.843262 | 345.9526977539,  | 3.52  |                                                   |
| 1641.730103 | 129.5063171387,  | 1.31  | x15 (0.01) : b16 (-0.02)                          |
| 1645.092773 | 162.4115905762,  | 1.65  | b32[2+] (0.35)                                    |
| 1646.969849 | 178.1039733887,  | 1.81  |                                                   |
| 1650.039917 | 183.942779541,   | 1.87  |                                                   |
| 1653.157593 | 117.980796814,   | 1.20  | c32[2+] (-0.09)                                   |
| 1712.812134 | 211.2999420166,  | 2.15  | b17 (0.02)                                        |
| 1713.792603 | 221.4109954834,  | 2.25  |                                                   |
| 1720.633911 | 102.1736373901,  | 1.04  | y32o[2+] (-0.14)                                  |
| 1728.302979 | 371.0422363281,  | 3.77  |                                                   |
| 1744.791382 | 188.9039764404,  | 1.92  |                                                   |
| 1746.923828 | 164.0008239746,  | 1.67  |                                                   |
| 1787.094116 | 99.2410888672,   | 1.01  |                                                   |
| 1788.608154 | 147.6708679199,  | 1.50  |                                                   |
| 1810.521606 | 130.1268920898,  | 1.32  | b18* (-0.27)                                      |
| 1825.780029 | 142.1108551025,  | 1.44  | b35o[2+] (-0.04) : b35*[2+] (-0.53)               |
| 1827.761841 | 1245.5180664063, | 12.68 | b18 (-0.05) : x34[2+] (-0.06)                     |
| 1828.751221 | 1219.1279296875, | 12.41 |                                                   |
| 1829.765137 | 406.6859741211,  | 4.14  |                                                   |
| 1830.682007 | 422.4458007813,  | 4.30  |                                                   |

S2140

# ProPhosSI MS/MS report

Mass: 792.029052734375 Charge: 3+

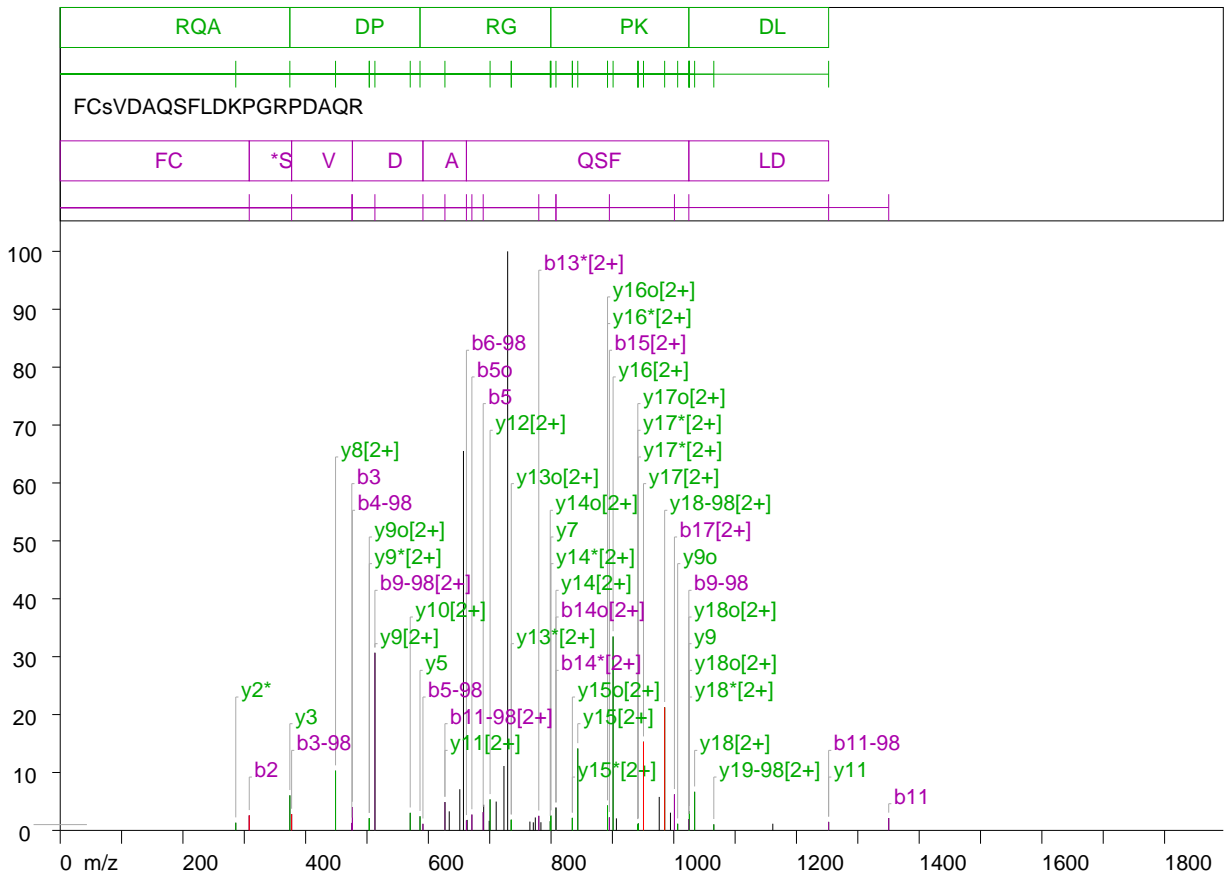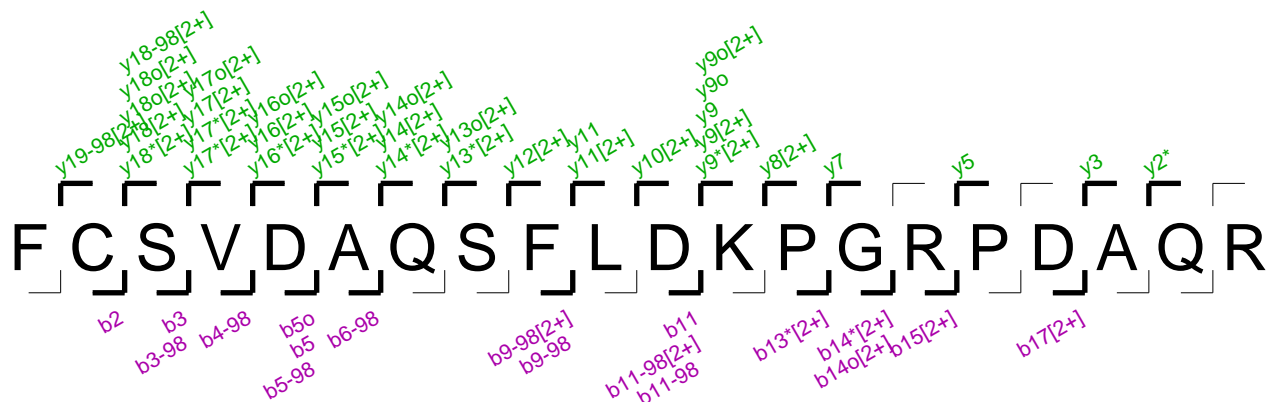



## Cav3.2 Rat

(64) 2138 FCsVDAQSFLDKPGRPDAQR 2157 2373.057 (0.0063) Da

|                         |     |
|-------------------------|-----|
| Parent Ion              | m/z |
| No parent ions observed |     |

## Modifications and supporting evidence

| Position | Residue ID | Modification | Evidence                            |
|----------|------------|--------------|-------------------------------------|
| 3        | (2140)     | Phospho (ST) | b2 => b3-98 : y17[2+] => y18-98[2+] |

## Spectrum interpretation

| Rule                                   | passed/tests | Description                                                                                                                                                                                                                                                                                                                                                                                                                                                                                                                                                                                                                                                                                                                                    |
|----------------------------------------|--------------|------------------------------------------------------------------------------------------------------------------------------------------------------------------------------------------------------------------------------------------------------------------------------------------------------------------------------------------------------------------------------------------------------------------------------------------------------------------------------------------------------------------------------------------------------------------------------------------------------------------------------------------------------------------------------------------------------------------------------------------------|
| Parent ions present                    | 0/1          | Parent ions corresponding to the parent fragment - 1 phosphate ions were not found                                                                                                                                                                                                                                                                                                                                                                                                                                                                                                                                                                                                                                                             |
| Three -98 Ions present                 | 1/1          | 8 des-phospho fragment ions were found.                                                                                                                                                                                                                                                                                                                                                                                                                                                                                                                                                                                                                                                                                                        |
| Unique -98 transitions present         | 1/1          | transition b2 to b3-98, transition y17[2+] to y18-98[2+] support unique phosphorylation at position 3 <br/>                                                                                                                                                                                                                                                                                                                                                                                                                                                                                                                                                                                                                                    |
| Four Sequential b or y ions            | 1/1          | Sequence of four b ions found from b2 to b5-98.<br>Sequence of four y ions found from y7 to y10.                                                                                                                                                                                                                                                                                                                                                                                                                                                                                                                                                                                                                                               |
| Five of six sequential ions present    | 1/1          | Five of Six ions found between b1 and b6<br>Five of Six ions found between b2 and b7<br>Five of Six ions found between y5 and y10<br>Five of Six ions found between y6 and y11<br>Five of Six ions found between y7 and y12<br>Five of Six ions found between y8 and y13<br>Five of Six ions found between y9 and y14<br>Five of Six ions found between y10 and y15<br>Five of Six ions found between y11 and y16<br>Five of Six ions found between y12 and y17<br>Five of Six ions found between y13 and y18<br>Five of Six ions found between y14 and y19<br>Five of Six ions found between y15 and y20                                                                                                                                      |
| Proline directed fragmentation pattern | 2/2          | PASS: y8> y7 with ratio 4.02<br/><br>No proline ions at b13-98<br/><br>PASS: y5> y4<br/><br>No proline ions at b16-98<br/>                                                                                                                                                                                                                                                                                                                                                                                                                                                                                                                                                                                                                     |
| PhosphoTyrosine transition present     | 0/0          | 0 of 0 phosphotyrosine transitions were found.                                                                                                                                                                                                                                                                                                                                                                                                                                                                                                                                                                                                                                                                                                 |
| Six of top ten ions identified         | 6/6          | ion 1 (mass: 729.2733154: intensity: 73467.46875) assigned 0 times<br>ion 2 (mass: 657.2333374: intensity: 48140.0703125) assigned 0 times<br>ion 3 (mass: 901.1086426: intensity: 24597.75) assigned 1 times<br>ion 4 (mass: 512.9051514: intensity: 22532.443359375) assigned 2 times<br>ion 5 (mass: 985.1512451: intensity: 15616.8916015625) assigned 1 times<br>ion 6 (mass: 950.6828613: intensity: 11243.8359375) assigned 1 times<br>ion 7 (mass: 843.5712891: intensity: 10390.8046875) assigned 2 times<br>ion 8 (mass: 723.2044678: intensity: 8172.6713867188) assigned 0 times<br>ion 9 (mass: 448.7330933: intensity: 7575.58984375) assigned 1 times<br>ion 10 (mass: 651.2639771: intensity: 5224.220703125) assigned 0 times |

## Ion Table

41 ions assigned of 56 ions above threshold (73%).

### N-terminal ions

| AA | N-ion | b                                | b*                                | b-98                                                   | bo                                |
|----|-------|----------------------------------|-----------------------------------|--------------------------------------------------------|-----------------------------------|
| F  | 1     | 148.076                          | 131.049                           | -                                                      | 130.065                           |
| C  | 2     | 308.106<br>*308.0829773 (2)      | 291.080                           | -                                                      | 290.096                           |
| s  | 3     | 475.105<br>475.2364502 (1)       | 458.078                           | 377.119<br>377.145752 (2)                              | 457.094                           |
| V  | 4     | 574.173                          | 557.147                           | 476.187<br>476.1846008 (4)                             | 556.163                           |
| D  | 5     | 689.200<br>689.4124146 (3)       | 672.174                           | 591.214<br>*591.1883545 (1)                            | 671.190<br>670.9814453 (2)        |
| A  | 6     | 760.237                          | 743.211                           | 662.251<br>*662.0357056 (1)                            | 742.227                           |
| Q  | 7     | 888.296                          | 871.269                           | 790.310                                                | 870.285                           |
| S  | 8     | 975.328                          | 958.301                           | 877.342                                                | 957.317                           |
| F  | 9     | 1122.396                         | 1105.370                          | 1024.410<br>*512.9051514 [2+] (30)<br>*1024.579224 (1) | 1104.386                          |
| L  | 10    | 1235.480                         | 1218.454                          | 1137.494                                               | 1217.470                          |
| D  | 11    | 1350.507<br>1350.379517 (2)      | 1333.481                          | 1252.521<br>*627.0083618 [2+] (4)<br>*1252.416016 (1)  | 1332.497                          |
| K  | 12    | 1478.602                         | 1461.576                          | 1380.616                                               | 1460.592                          |
| P  | 13    | 1575.655                         | 1558.628<br>779.9871826 [2+] (2)  | 1477.669                                               | 1557.644                          |
| G  | 14    | 1632.676                         | 1615.650<br>*808.0158691 [2+] (3) | 1534.691                                               | 1614.666<br>*808.0158691 [2+] (3) |
| R  | 15    | 1788.778<br>895.0892334 [2+] (2) | 1771.751                          | 1690.792                                               | 1770.767                          |
| P  | 16    | 1885.830                         | 1868.804                          | 1787.844                                               | 1867.820                          |
| D  | 17    | 2000.857<br>1001.099731 [2+] (6) | 1983.831                          | 1902.871                                               | 1982.847                          |
| A  | 18    | 2071.894                         | 2054.868                          | 1973.909                                               | 2053.884                          |
| Q  | 19    | 2199.953                         | 2182.926                          | 2101.967                                               | 2181.942                          |
| R  | 20    | -                                | -                                 | -                                                      | -                                 |

### C-terminal ions

| AA | C-ion | y                                  | y*                                                         | y-98                              | yo                                                         |
|----|-------|------------------------------------|------------------------------------------------------------|-----------------------------------|------------------------------------------------------------|
| F  | 20    | -                                  | -                                                          | -                                 | -                                                          |
| C  | 19    | 2226.996                           | 2209.970                                                   | 2129.010<br>1065.251465 [2+] (1)  | 2208.986                                                   |
| s  | 18    | 2066.966<br>1034.029663 [2+] (6)   | 2049.939<br>*1025.490967 [2+] (3)                          | 1968.980<br>985.1512451 [2+] (21) | 2048.955<br>*1024.579224 [2+] (1)<br>*1025.490967 [2+] (3) |
| V  | 17    | 1899.967<br>950.6828613 [2+] (15)  | 1882.941<br>*942.1848145 [2+] (1)<br>*941.3969727 [2+] (1) | -                                 | 1881.957<br>*941.3969727 [2+] (1)                          |
| D  | 16    | 1800.899<br>901.1086426 [2+] (33)  | 1783.872<br>*892.0495605 [2+] (4)                          | -                                 | 1782.888<br>*892.0495605 [2+] (4)                          |
| A  | 15    | 1685.872<br>*843.5712891 [2+] (14) | 1668.845<br>*834.743042 [2+] (2)                           | -                                 | 1667.861<br>*834.743042 [2+] (2)                           |
| Q  | 14    | 1614.835<br>*808.0158691 [2+] (3)  | 1597.808<br>*799.6242676 [2+] (2)                          | -                                 | 1596.824<br>798.7033691 [2+] (1)                           |
| S  | 13    | 1486.776                           | 1469.750<br>*735.1331787 [2+] (1)                          | -                                 | 1468.766<br>*735.1331787 [2+] (1)                          |

|   |    |                                                        |                                   |   |                                                      |
|---|----|--------------------------------------------------------|-----------------------------------|---|------------------------------------------------------|
| F | 12 | 1399.744<br>700.6144409 [2+] (5)                       | 1382.718                          | - | 1381.734                                             |
| L | 11 | 1252.676<br>*627.0083618 [2+] (4)<br>*1252.416016 (1)  | 1235.649                          | - | 1234.665                                             |
| D | 10 | 1139.592<br>*570.4623413 [2+] (3)                      | 1122.565                          | - | 1121.581                                             |
| K | 9  | 1024.565<br>*512.9051514 [2+] (30)<br>*1024.579224 (1) | 1007.538<br>*503.7305298 [2+] (2) | - | 1006.554<br>1006.384644 (1)<br>*503.7305298 [2+] (2) |
| P | 8  | 896.470<br>448.7330933 [2+] (10)                       | 879.443                           | - | 878.459                                              |
| G | 7  | 799.417<br>*799.6242676 (2)                            | 782.390                           | - | 781.406                                              |
| R | 6  | 742.396                                                | 725.369                           | - | 724.385                                              |
| P | 5  | 586.294<br>586.4136963 (2)                             | 569.268                           | - | 568.284                                              |
| D | 4  | 489.242                                                | 472.215                           | - | 471.231                                              |
| A | 3  | 374.215<br>374.2678223 (6)                             | 357.188                           | - | 356.204                                              |
| Q | 2  | 303.178                                                | 286.151<br>*286.1059875 (1)       | - | 285.167                                              |
| R | 1  | 175.119                                                | 158.092                           | - | 157.108                                              |

### Ion distribution

| Threshold | Ion count | Matches | % matched |
|-----------|-----------|---------|-----------|
| 0         | 130       | 63      | 48        |
| 0.5       | 73        | 48      | 65        |
| 1         | 56        | 41      | 73        |
| 2         | 38        | 28      | 73        |
| 3         | 26        | 17      | 65        |
| 4         | 20        | 13      | 65        |
| 5         | 15        | 10      | 66        |
| 10        | 9         | 6       | 66        |

### Observed ions > 1%

| m/z         | Intensity                    | % max | Assignment (delta)                                 |
|-------------|------------------------------|-------|----------------------------------------------------|
| 286.1059875 | 974.1842651367 <sub>5</sub>  | 1.32  | y2* (-0.04) : z2 (-0.04)                           |
| 308.0829773 | 1899.8778076172 <sub>5</sub> | 2.58  | x5[2+] (0.43) : b2 (-0.02)                         |
| 374.2678223 | 4443.68359375 <sub>5</sub>   | 6.04  | y3 (0.05)                                          |
| 377.145752  | 2068.8461914063 <sub>5</sub> | 2.81  | b3-98 (0.02)                                       |
| 448.7330933 | 7575.58984375 <sub>5</sub>   | 10.31 | y8[2+] (-0.00)                                     |
| 475.2364502 | 947.9268188477 <sub>5</sub>  | 1.29  | b3 (0.13)                                          |
| 476.1846008 | 2952.310546875 <sub>5</sub>  | 4.01  | b4-98 (-0.00)                                      |
| 503.7305298 | 1545.9370117188 <sub>5</sub> | 2.10  | y9o[2+] (-0.05) : y9*[2+] (-0.54) : z9[2+] (-0.54) |
| 512.9051514 | 22532.443359375 <sub>5</sub> | 30.66 | b9-98[2+] (0.19) : y9[2+] (0.11)                   |
| 570.4623413 | 2229.6989746094 <sub>5</sub> | 3.03  | c9[2+] (0.24) : y10[2+] (0.16)                     |
| 586.4136963 | 1790.0126953125 <sub>5</sub> | 2.43  | y5 (0.11)                                          |

|             |                   |       |                                                       |
|-------------|-------------------|-------|-------------------------------------------------------|
| 591.1883545 | 834.2610473633,   | 1.13  | c4 (-0.01) : b5-98 (-0.02)                            |
| 627.0083618 | 3592.6420898438,  | 4.89  | c10[2+] (0.25) : b11-98[2+] (0.24) : y11[2+] (0.16)   |
| 634.0695801 | 2418.1518554688,  | 3.29  |                                                       |
| 651.2639771 | 5224.220703125,   | 7.11  |                                                       |
| 657.2333374 | 48140.0703125,    | 65.52 |                                                       |
| 662.0357056 | 1267.0261230469,  | 1.72  | a11[2+] (0.27) : b6-98 (-0.21)                        |
| 663.2822266 | 1332.8712158203,  | 1.81  |                                                       |
| 670.9814453 | 2006.529296875,   | 2.73  | b5o (-0.20)                                           |
| 689.4124146 | 2314.1645507813,  | 3.14  | b5 (0.21)                                             |
| 690.1801758 | 3261.8449707031,  | 4.43  |                                                       |
| 699.1901245 | 1218.8623046875,  | 1.65  |                                                       |
| 700.6144409 | 3932.0483398438,  | 5.35  | y12[2+] (0.23)                                        |
| 710.5640869 | 3658.5620117188,  | 4.97  |                                                       |
| 723.2044678 | 8172.6713867188,  | 11.12 |                                                       |
| 729.2733154 | 73467.46875,      | 100   |                                                       |
| 735.1331787 | 1351.1003417969,  | 1.83  | y13o[2+] (0.24) : y13*[2+] (-0.24) : z13[2+] (-0.24)  |
| 765.5089111 | 1115.9924316406,  | 1.51  | a13o[2+] (0.17) : a13*[2+] (-0.31)                    |
| 771.0776367 | 1023.6697998047,  | 1.39  |                                                       |
| 774.3555908 | 1642.5144042969,  | 2.23  | a13[2+] (0.02)                                        |
| 779.9871826 | 1845.7575683594,  | 2.51  | b13*[2+] (0.16)                                       |
| 783.4699707 | 1036.4503173828,  | 1.41  |                                                       |
| 798.7033691 | 1165.8005371094,  | 1.58  | y14o[2+] (-0.21)                                      |
| 799.6242676 | 1883.2327880859,  | 2.56  | y14*[2+] (0.21) : z14[2+] (0.21) : y7 (0.20)          |
| 808.0158691 | 2881.1079101563,  | 3.92  | b14o[2+] (0.17) : y14[2+] (0.09) : b14*[2+] (-0.31)   |
| 834.743042  | 1585.2979736328,  | 2.15  | y15o[2+] (0.30) : y15*[2+] (-0.18) : z15[2+] (-0.18)  |
| 843.5712891 | 10390.8046875,    | 14.14 | a7* (0.29) : y15[2+] (0.13)                           |
| 892.0495605 | 3151.5329589844,  | 4.28  | y16o[2+] (0.10) : y16*[2+] (-0.39) : z16[2+] (-0.39)  |
| 895.0892334 | 1652.1293945313,  | 2.24  | b15[2+] (0.19)                                        |
| 901.1086426 | 24597.75,         | 33.48 | y16[2+] (0.15)                                        |
| 906.5185547 | 1526.7287597656,  | 2.07  |                                                       |
| 941.3969727 | 762.6462402344,   | 1.03  | y17o[2+] (-0.08) : y17*[2+] (-0.57) : z17[2+] (-0.57) |
| 942.1848145 | 900.0485839844,   | 1.22  | y17*[2+] (0.21) : z17[2+] (0.21)                      |
| 950.6828613 | 11243.8359375,    | 15.30 | y17[2+] (0.19)                                        |
| 976.3186035 | 4248.3325195313,  | 5.78  |                                                       |
| 985.1512451 | 15616.8916015625, | 21.25 | y18-98[2+] (0.15)                                     |
| 994.6170654 | 2248.2019042969,  | 3.06  |                                                       |
| 1001.099731 | 4569.3833007813,  | 6.21  | b17[2+] (0.16)                                        |
| 1006.384644 | 842.6565551758,   | 1.14  | y9o (-0.17)                                           |
| 1024.579224 | 1424.1448974609,  | 1.93  | b9-98 (0.16) : y9 (0.01) : y18o[2+] (-0.40)           |
| 1025.490967 | 2424.359375,      | 3.29  | y18o[2+] (0.50) : y18*[2+] (0.01) : z18[2+] (0.01)    |
| 1034.029663 | 4897.896484375,   | 6.66  | y18[2+] (0.04)                                        |
| 1065.251465 | 766.842590332,    | 1.04  | y19-98[2+] (0.24)                                     |
| 1161.442871 | 848.2239990234,   | 1.15  |                                                       |

|             |                  |      |                                            |
|-------------|------------------|------|--------------------------------------------|
| 1252.416016 | 1076.7916259766, | 1.46 | c10 (-0.09) : b11-98 (-0.10) : y11 (-0.26) |
| 1350.379517 | 1569.7095947266, | 2.13 | b11 (-0.12)                                |

S2159

or

S2160

# ProPhosSI MS/MS report

Mass: 1105.478393554688 Charge: 2+

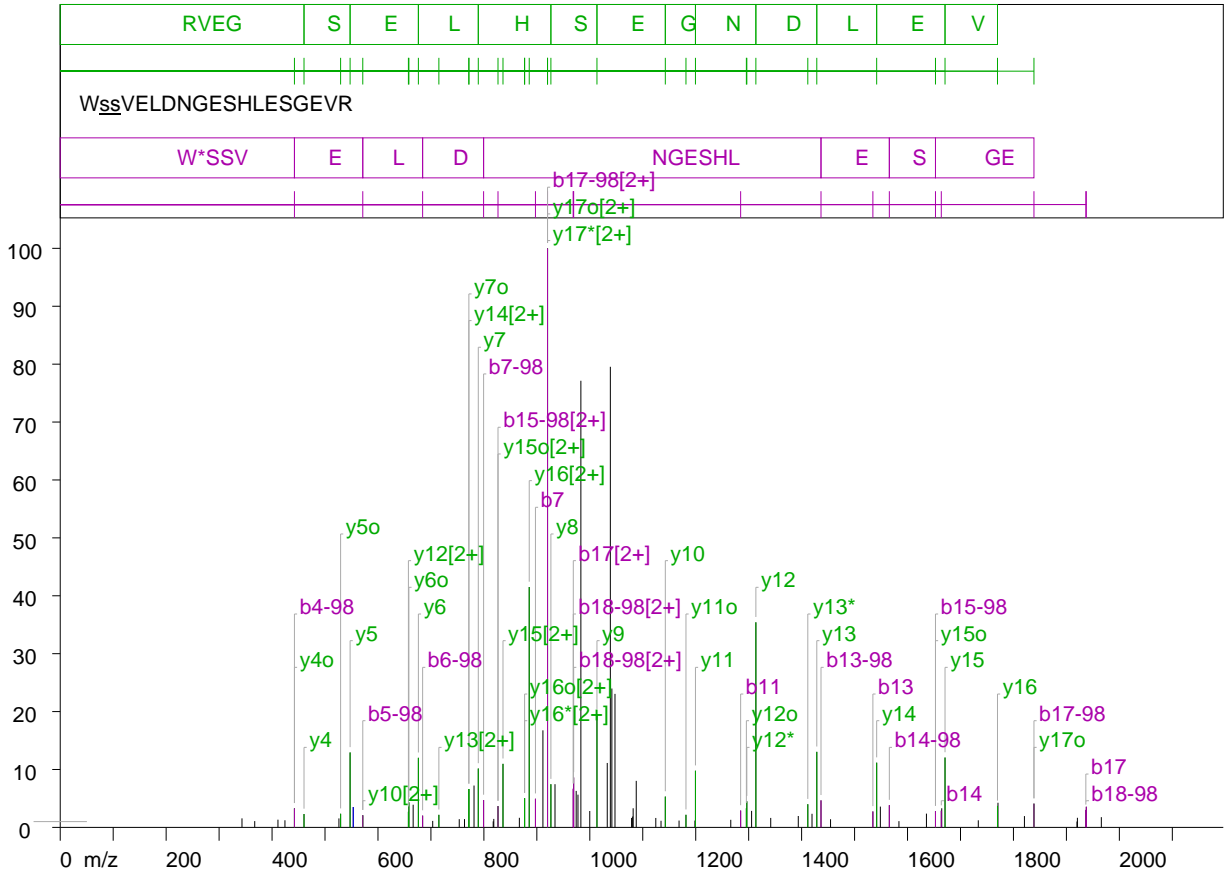

W S S V E L D N G E S H L E S G E V R

Labels for b and y ions are positioned below the sequence:

- b4-98, b5-98, b6-98, b7-98, b7
- b11
- b13-98, b13, b14-98, b14, b15-98, b15-98[2+]
- b17-98[2+], b17-98, b18-98[2+], b17, b18-98

## Cav3.2 Rat

(82) 2158 W<sub>ss</sub>VELDNGESHLESGEVR 2176 2208.932 (0.0086) Da

### Modifications and supporting evidence

| Position | Residue ID     | Modification | Evidence     |
|----------|----------------|--------------|--------------|
| 2 or 3   | (2159 or 2160) | Phospho (ST) | b6-98, b7-98 |

### Spectrum interpretation

| Rule                                   | passed/tests | Description                                                                                                                                                                                                                                                                                                                                                                                                                                                                                                                                                                                                                                                                                                                                               |
|----------------------------------------|--------------|-----------------------------------------------------------------------------------------------------------------------------------------------------------------------------------------------------------------------------------------------------------------------------------------------------------------------------------------------------------------------------------------------------------------------------------------------------------------------------------------------------------------------------------------------------------------------------------------------------------------------------------------------------------------------------------------------------------------------------------------------------------|
| Parent ions present                    | 0/1          | Parent ions corresponding to the parent fragment - 1 phosphate ions were not found                                                                                                                                                                                                                                                                                                                                                                                                                                                                                                                                                                                                                                                                        |
| Three -98 Ions present                 | 1/1          | 9 des-phospho fragment ions were found.                                                                                                                                                                                                                                                                                                                                                                                                                                                                                                                                                                                                                                                                                                                   |
| Unique -98 transitions present         | 0/1          | b6-98, b7-98 support phosphorylation at position 2 or 3<br><br/>                                                                                                                                                                                                                                                                                                                                                                                                                                                                                                                                                                                                                                                                                          |
| Four Sequential b or y ions            | 1/1          | Sequence of four b ions found from b4-98 to b7-98.<br>Sequence of four y ions found from y4 to y7.                                                                                                                                                                                                                                                                                                                                                                                                                                                                                                                                                                                                                                                        |
| Five of six sequential ions present    | 1/1          | Five of Six ions found between b13 and b18<br>Five of Six ions found between y3 and y8<br>Five of Six ions found between y4 and y9<br>Five of Six ions found between y5 and y10<br>Five of Six ions found between y6 and y11<br>Five of Six ions found between y7 and y12<br>Five of Six ions found between y8 and y13<br>Five of Six ions found between y9 and y14<br>Five of Six ions found between y10 and y15<br>Five of Six ions found between y11 and y16<br>Five of Six ions found between y12 and y17                                                                                                                                                                                                                                             |
| Proline directed fragmentation pattern | 0/0          |                                                                                                                                                                                                                                                                                                                                                                                                                                                                                                                                                                                                                                                                                                                                                           |
| PhosphoTyrosine transition present     | 0/0          | 0 of 0 phosphotyrosine transitions were found.                                                                                                                                                                                                                                                                                                                                                                                                                                                                                                                                                                                                                                                                                                            |
| Six of top ten ions identified         | 7/6          | ion 1 (mass: 920.2125244: intensity: 31640.0234375) assigned 4 times<br>ion 2 (mass: 1038.792725: intensity: 25169.455078125) assigned 0 times<br>ion 3 (mass: 983.1625977: intensity: 24405.22265625) assigned 1 times<br>ion 4 (mass: 885.6448975: intensity: 13134.2109375) assigned 1 times<br>ion 5 (mass: 1313.587524: intensity: 11205.7109375) assigned 1 times<br>ion 6 (mass: 1041.688965: intensity: 7588.2602539063) assigned 1 times<br>ion 7 (mass: 1047.586426: intensity: 7296.056640625) assigned 0 times<br>ion 8 (mass: 1013.508789: intensity: 6180.7280273438) assigned 1 times<br>ion 9 (mass: 911.4976807: intensity: 5303.6552734375) assigned 0 times<br>ion 10 (mass: 1428.648071: intensity: 4128.0498046875) assigned 1 times |

### Ion Table

48 ions assigned of 64 ions above threshold (75%).



## N-terminal ions

| AA | N-ion | b                                                    | b*       | b-98                                                                         | bo       |
|----|-------|------------------------------------------------------|----------|------------------------------------------------------------------------------|----------|
| W  | 1     | 187.087                                              | 170.060  | -                                                                            | 169.076  |
| s  | 2     | 354.085                                              | 337.058  | 256.099                                                                      | 336.074  |
| S  | 3     | 441.117                                              | 424.090  | 343.131                                                                      | 423.106  |
| V  | 4     | 540.185                                              | 523.159  | 442.200<br>*442.241394 (3)                                                   | 522.175  |
| E  | 5     | 669.228                                              | 652.201  | 571.242<br>*571.3088379 (2)                                                  | 651.217  |
| L  | 6     | 782.312                                              | 765.286  | 684.326<br>684.3197021 (2)                                                   | 764.302  |
| D  | 7     | 897.339<br>897.3726807 (4)                           | 880.313  | 799.353<br>*799.4755859 (4)                                                  | 879.328  |
| N  | 8     | 1011.382                                             | 994.355  | 913.396                                                                      | 993.371  |
| G  | 9     | 1068.403                                             | 1051.377 | 970.418                                                                      | 1050.393 |
| E  | 10    | 1197.446                                             | 1180.42  | 1099.460                                                                     | 1179.435 |
| S  | 11    | 1284.478<br>1284.861328 (2)                          | 1267.452 | 1186.492                                                                     | 1266.468 |
| H  | 12    | 1421.537                                             | 1404.510 | 1323.551                                                                     | 1403.526 |
| L  | 13    | 1534.621<br>1534.574097 (2)                          | 1517.595 | 1436.635<br>1436.594727 (4)                                                  | 1516.610 |
| E  | 14    | 1663.664<br>1663.724121 (2)                          | 1646.637 | 1565.678<br>1565.639404 (3)                                                  | 1645.653 |
| S  | 15    | 1750.696                                             | 1733.669 | 1652.710<br>*1652.740112 (2)<br>*826.6634521 [2+] (3)                        | 1732.685 |
| G  | 16    | 1807.717                                             | 1790.691 | 1709.731                                                                     | 1789.707 |
| E  | 17    | 1936.760<br>*968.8349609 [2+] (6)<br>1936.686035 (3) | 1919.733 | 1838.774<br>*920.2125244 [2+] (100)<br>*1838.726685 (4)                      | 1918.749 |
| V  | 18    | 2035.828                                             | 2018.802 | 1937.842<br>*968.8349609 [2+] (6)<br>969.5231934 [2+] (8)<br>1937.594849 (3) | 2017.818 |
| R  | 19    | -                                                    | -        | -                                                                            | -        |

## C-terminal ions

| AA | C-ion | y                                                     | y*                                  | y-98     | yo                                                      |
|----|-------|-------------------------------------------------------|-------------------------------------|----------|---------------------------------------------------------|
| W  | 19    | -                                                     | -                                   | -        | -                                                       |
| s  | 18    | 2023.861                                              | 2006.834                            | 1925.875 | 2005.850                                                |
| S  | 17    | 1856.862                                              | 1839.836<br>*920.2125244 [2+] (100) | -        | 1838.852<br>*920.2125244 [2+] (100)<br>*1838.726685 (4) |
| V  | 16    | 1769.830<br>885.6448975 [2+] (41)<br>1769.880859 (3)  | 1752.804<br>*876.8533936 [2+] (5)   | -        | 1751.820<br>*876.8533936 [2+] (5)                       |
| E  | 15    | 1670.762<br>1670.786255 (12)<br>836.0961914 [2+] (10) | 1653.735                            | -        | 1652.751<br>*1652.740112 (2)<br>*826.6634521 [2+] (3)   |
| L  | 14    | 1541.719<br>1541.711426 (11)<br>*771.6784668 [2+] (6) | 1524.693                            | -        | 1523.709                                                |
| D  | 13    | 1428.635<br>715.0061035 [2+] (2)<br>1428.648071 (13)  | 1411.609<br>*1411.6604 (4)          | -        | 1410.625                                                |
| N  | 12    | 1313.608<br>657.458252 [2+] (2)<br>1313.587524 (35)   | 1296.582<br>*1296.52771 (4)         | -        | 1295.598<br>1295.66687 (3)                              |

|   |    |                                                      |          |   |                             |
|---|----|------------------------------------------------------|----------|---|-----------------------------|
| G | 11 | 1199.565<br>1199.544067 (9)                          | 1182.539 | - | 1181.555<br>1181.610107 (2) |
| E | 10 | 1142.544<br>*571.3088379 [2+] (2)<br>1142.599976 (5) | 1125.517 | - | 1124.533                    |
| S | 9  | 1013.501<br>1013.508789 (19)                         | 996.475  | - | 995.491                     |
| H | 8  | 926.469<br>926.5155029 (7)                           | 909.443  | - | 908.459                     |
| L | 7  | 789.410<br>789.4371338 (10)                          | 772.384  | - | 771.400<br>*771.6784668 (6) |
| E | 6  | 676.326<br>676.3398438 (12)                          | 659.300  | - | 658.316<br>658.3678589 (4)  |
| S | 5  | 547.284<br>547.3872681 (12)                          | 530.257  | - | 529.273<br>529.4467163 (2)  |
| G | 4  | 460.251<br>460.3409424 (2)                           | 443.225  | - | 442.241<br>*442.241394 (3)  |
| E | 3  | 403.230                                              | 386.203  | - | 385.219                     |
| V | 2  | 274.187                                              | 257.161  | - | 256.177                     |
| R | 1  | 175.119                                              | 158.092  | - | 157.108                     |

### Ion distribution

| Threshold | Ion count | Matches | % matched |
|-----------|-----------|---------|-----------|
| 0         | 160       | 76      | 47        |
| 0.5       | 126       | 69      | 54        |
| 1         | 91        | 61      | 67        |
| 2         | 64        | 47      | 73        |
| 3         | 49        | 35      | 71        |
| 4         | 36        | 27      | 75        |
| 5         | 29        | 21      | 72        |
| 10        | 17        | 13      | 76        |

### Observed ions > 1%

| m/z         | Intensity                    | % max | Assignment (delta)                               |
|-------------|------------------------------|-------|--------------------------------------------------|
| 343.2074585 | 493.7665405273 <sub>s</sub>  | 1.56  | b6-98[2+] (0.54) : b3-98 (0.07) : c5[2+] (-0.42) |
| 367.2773132 | 344.213470459 <sub>s</sub>   | 1.08  |                                                  |
| 411.1265869 | 422.0762939453 <sub>s</sub>  | 1.33  |                                                  |
| 424.3180542 | 389.1141662598 <sub>s</sub>  | 1.22  | b3* (0.22)                                       |
| 442.241394  | 1039.8560791016 <sub>s</sub> | 3.28  | b4-98 (0.04) : y4o (-4.10)                       |
| 460.3409424 | 730.4138793945 <sub>s</sub>  | 2.30  | y4 (0.08)                                        |
| 526.2937012 | 491.1900939941 <sub>s</sub>  | 1.55  | b9o[2+] (0.59) : b9*[2+] (0.10)                  |
| 529.4467163 | 744.7546386719 <sub>s</sub>  | 2.35  | y5o (0.17)                                       |
| 547.3872681 | 4094.4716796875 <sub>s</sub> | 12.94 | y5 (0.10)                                        |
| 553.3226929 | 1111.9011230469 <sub>s</sub> | 3.51  |                                                  |
| 571.3088379 | 663.4938964844 <sub>s</sub>  | 2.09  | b5-98 (0.06) : y10[2+] (-0.46)                   |
| 657.458252  | 853.4836425781 <sub>s</sub>  | 2.69  | y12[2+] (0.15)                                   |
| 658.3678589 | 1368.7294921875 <sub>s</sub> | 4.32  | y6o (0.05)                                       |

|             |                 |       |                                                                          |
|-------------|-----------------|-------|--------------------------------------------------------------------------|
| 666.4580688 | 1238.9814453125 | 3.91  |                                                                          |
| 676.3398438 | 3801.4255371094 | 12.01 | y6 (0.01)                                                                |
| 684.3197021 | 643.3551025391  | 2.03  | b6-98 (-0.00)                                                            |
| 703.3656006 | 355.5440673828  | 1.12  |                                                                          |
| 715.0061035 | 686.1969604492  | 2.16  | y13[2+] (0.18)                                                           |
| 753.4667969 | 449.7402954102  | 1.42  | a13[2+] (-0.35)                                                          |
| 763.3782349 | 452.7930297852  | 1.43  | y14*[2+] (0.52) : z14[2+] (0.52)                                         |
| 771.6784668 | 2098.1103515625 | 6.63  | y14[2+] (0.31) : y7o (0.27)                                              |
| 781.3804321 | 2287.2585449219 | 7.22  |                                                                          |
| 789.4371338 | 3215.8603515625 | 10.16 | y7 (0.02)                                                                |
| 799.4755859 | 1494.1215820313 | 4.72  | c6 (0.13) : b7-98 (0.12)                                                 |
| 817.6102295 | 330.5139160156  | 1.04  | x7 (0.20)                                                                |
| 818.6966553 | 463.8697509766  | 1.46  | a14[2+] (0.35)                                                           |
| 826.6634521 | 1163.5861816406 | 3.67  | b15-98[2+] (-0.19) : y15o[2+] (-0.21)                                    |
| 836.0961914 | 3472.7626953125 | 10.97 | y15[2+] (0.21)                                                           |
| 867.0054932 | 524.3927001953  | 1.65  | b15o[2+] (0.15) : b15*[2+] (-0.33)                                       |
| 876.8533936 | 1593.998046875  | 5.03  | y16o[2+] (0.43) : y16*[2+] (-0.05) : z16[2+] (-0.05)                     |
| 885.6448975 | 13134.2109375   | 41.51 | y16[2+] (0.22)                                                           |
| 897.3726807 | 1564.3291015625 | 4.94  | b7 (0.03)                                                                |
| 911.4976807 | 5303.6552734375 | 16.76 |                                                                          |
| 920.2125244 | 31640.0234375   | 100   | b17-98[2+] (0.32) : y17o[2+] (0.28) : y17*[2+] (-0.20) : z17[2+] (-0.20) |
| 926.5155029 | 2358.8310546875 | 7.45  | y8 (0.04)                                                                |
| 934.2750244 | 2361.2819824219 | 7.46  |                                                                          |
| 968.8349609 | 2111.7446289063 | 6.67  | b17[2+] (-0.04) : b18-98[2+] (-0.59)                                     |
| 969.5231934 | 2728.7707519531 | 8.62  | b18-98[2+] (0.09)                                                        |
| 974.3029785 | 1993.4410400391 | 6.30  |                                                                          |
| 977.6455078 | 1788.4710693359 | 5.65  | c17[2+] (0.24)                                                           |
| 983.1625977 | 24405.22265625  | 77.13 | a8 (-0.22)                                                               |
| 999.907959  | 895.6212768555  | 2.83  |                                                                          |
| 1013.508789 | 6180.7280273438 | 19.53 | y9 (0.00)                                                                |
| 1032.950928 | 3520.8442382813 | 11.12 |                                                                          |
| 1038.792725 | 25169.455078125 | 79.54 |                                                                          |
| 1041.688965 | 7588.2602539063 | 23.98 | x9 (0.19)                                                                |
| 1047.586426 | 7296.056640625  | 23.05 |                                                                          |
| 1078.880737 | 518.1544189453  | 1.63  |                                                                          |
| 1080.904907 | 594.7745361328  | 1.87  |                                                                          |
| 1081.881592 | 1045.4393310547 | 3.30  |                                                                          |
| 1087.691772 | 2543.0361328125 | 8.03  |                                                                          |
| 1124.632935 | 515.6243896484  | 1.62  | y10o (0.09)                                                              |
| 1134.504639 | 362.2069702148  | 1.14  |                                                                          |
| 1142.599976 | 1683.1403808594 | 5.31  | y10 (0.05)                                                               |
| 1168.562744 | 373.3954162598  | 1.18  |                                                                          |

|             |                  |       |                               |
|-------------|------------------|-------|-------------------------------|
| 1181.610107 | 688.3700561523,  | 2.17  | y11o (0.05)                   |
| 1198.510254 | 372.8473205566,  | 1.17  |                               |
| 1199.544067 | 3095.3076171875, | 9.78  | y11 (-0.02)                   |
| 1266.192017 | 415.2008666992,  | 1.31  | b11o (-0.27)                  |
| 1284.861328 | 920.0650024414,  | 2.90  | b11 (0.38)                    |
| 1295.66687  | 1045.9750976563, | 3.30  | y12o (0.06)                   |
| 1296.52771  | 1427.2393798828, | 4.51  | y12* (-0.05) : z12 (-0.05)    |
| 1305.560547 | 902.6091918945,  | 2.85  |                               |
| 1313.587524 | 11205.7109375,   | 35.41 | y12 (-0.02)                   |
| 1341.642944 | 517.7131347656,  | 1.63  | x12 (0.03)                    |
| 1393.658447 | 622.7503051758,  | 1.96  | a12 (0.11)                    |
| 1411.6604   | 1265.9016113281, | 4.00  | y13* (0.05) : z13 (0.05)      |
| 1419.640137 | 744.2537231445,  | 2.35  |                               |
| 1428.648071 | 4128.0498046875, | 13.04 | y13 (0.01)                    |
| 1436.594727 | 1477.8366699219, | 4.67  | b13-98 (-0.04)                |
| 1454.598999 | 445.9414672852,  | 1.40  |                               |
| 1534.574097 | 871.2125854492,  | 2.75  | b13 (-0.04)                   |
| 1541.711426 | 3535.4965820313, | 11.17 | y14 (-0.00)                   |
| 1548.658203 | 1136.2373046875, | 3.59  |                               |
| 1565.639404 | 1213.7650146484, | 3.83  | b14-98 (-0.03)                |
| 1583.7854   | 341.3573303223,  | 1.07  |                               |
| 1635.710571 | 752.2910766602,  | 2.37  | a14 (0.04)                    |
| 1652.740112 | 891.3295898438,  | 2.81  | b15-98 (0.02) : y15o (-0.01)  |
| 1663.724121 | 913.4253540039,  | 2.88  | b14 (0.05)                    |
| 1664.606812 | 1045.3355712891, | 3.30  |                               |
| 1670.786255 | 3816.4296875,    | 12.06 | y15 (0.02)                    |
| 1733.61438  | 387.9171447754,  | 1.22  | b15* (-0.05)                  |
| 1769.880859 | 1172.7219238281, | 3.70  | y16 (0.05)                    |
| 1770.761108 | 1347.0482177734, | 4.25  |                               |
| 1820.735962 | 618.0715332031,  | 1.95  |                               |
| 1838.726685 | 1296.6644287109, | 4.09  | b17-98 (-0.04) : y17o (-0.12) |
| 1919.970825 | 321.3828430176,  | 1.01  | b17* (0.23)                   |
| 1920.779541 | 525.0307006836,  | 1.65  |                               |
| 1936.686035 | 953.3490600586,  | 3.01  | b17 (-0.07)                   |
| 1937.594849 | 1128.8596191406, | 3.56  | b18-98 (-0.24)                |
| 1965.926025 | 559.6905517578,  | 1.76  |                               |

S2195

# ProPhosSI MS/MS report

Mass: 1154.528853 Charge: 3+

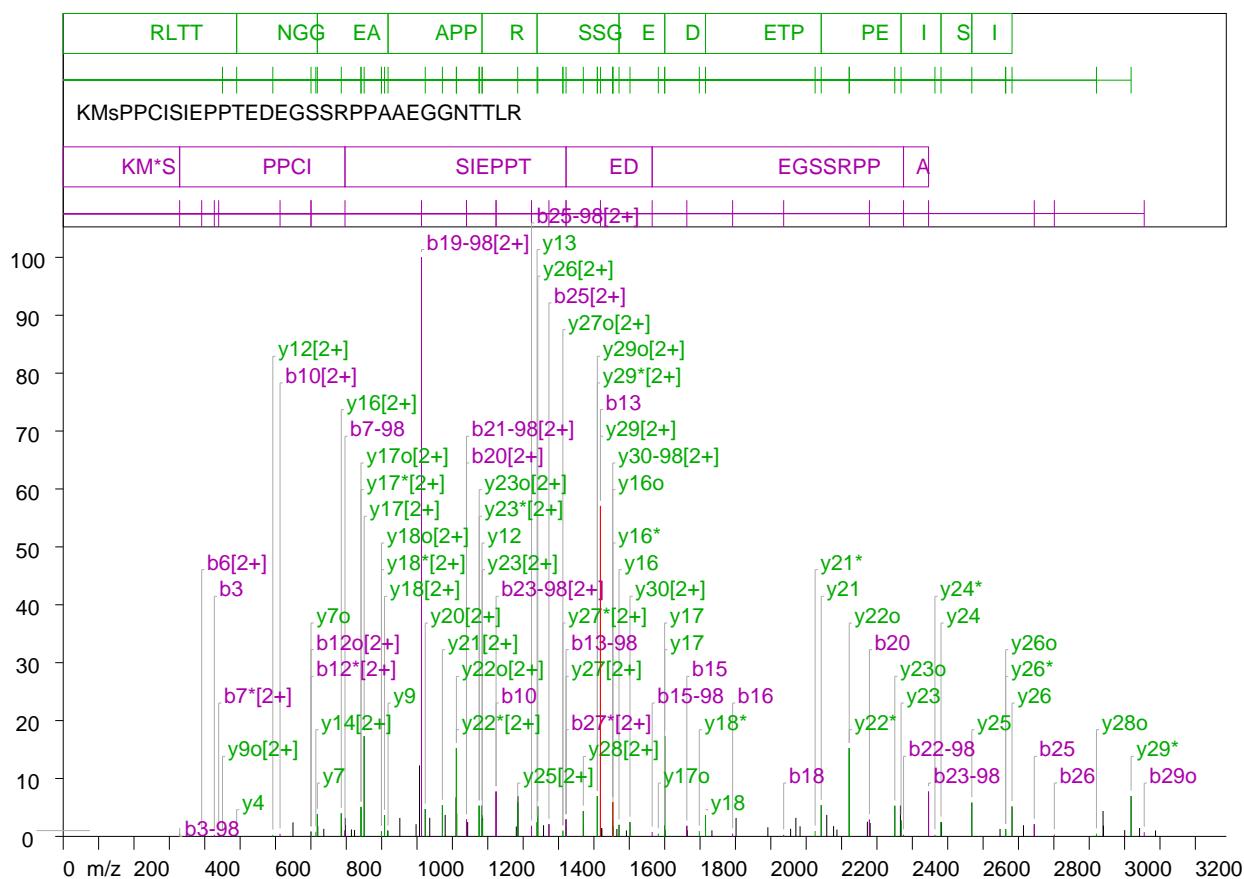

KMS

b3  
b3-98

PPPCISIEPPTEDGSSRPPAAEGGN

b6[2+]  
b7\*[2+]  
b7-98

b10[2+]  
b10

b12\*[2+]  
b12-98  
b13-98

b15-98  
b16

b18  
b19-98[2+]  
b20[2+]  
b21-98[2+]

b22-98  
b23-98  
b23-98[2+]

b25  
b25[2+]  
b25-98[2+]  
b26  
b27\*[2+]

TTLR

b290

## Cav3.2 Rat

(57) 2193 KMsPPCISIEPPTTEDEGSSRPPAAEGGNTTLR 2224 3460.564 (-0.0010) Da

|                         |     |
|-------------------------|-----|
| Parent Ion              | m/z |
| No parent ions observed |     |

## Modifications and supporting evidence

| Position | Residue ID | Modification | Evidence |
|----------|------------|--------------|----------|
| 3        | (2195)     | Phospho (ST) | b3-98    |

## Spectrum interpretation

| Rule                                   | passed/tests | Description                                                                                                                                                                                                                                                                                                                                                                                                                                                                                                                                                                                                                                                    |
|----------------------------------------|--------------|----------------------------------------------------------------------------------------------------------------------------------------------------------------------------------------------------------------------------------------------------------------------------------------------------------------------------------------------------------------------------------------------------------------------------------------------------------------------------------------------------------------------------------------------------------------------------------------------------------------------------------------------------------------|
| Parent ions present                    | 0/1          | Parent ions corresponding to the parent fragment - 1 phosphate ions were not found                                                                                                                                                                                                                                                                                                                                                                                                                                                                                                                                                                             |
| Three -98 Ions present                 | 1/1          | 10 des-phospho fragment ions were found.                                                                                                                                                                                                                                                                                                                                                                                                                                                                                                                                                                                                                       |
| Unique -98 transitions present         | 1/1          |                                                                                                                                                                                                                                                                                                                                                                                                                                                                                                                                                                                                                                                                |
| Four Sequential b or y ions            | 1/1          | Sequence of four y ions found from y23 to y26.                                                                                                                                                                                                                                                                                                                                                                                                                                                                                                                                                                                                                 |
| Five of six sequential ions present    | 1/1          | Five of Six ions found between y12 and y17<br>Five of Six ions found between y13 and y18<br>Five of Six ions found between y16 and y21<br>Five of Six ions found between y20 and y25<br>Five of Six ions found between y21 and y26<br>Five of Six ions found between y22 and y27<br>Five of Six ions found between y23 and y28<br>Five of Six ions found between y24 and y29<br>Five of Six ions found between y25 and y30<br>Five of Six ions found between y26 and y31                                                                                                                                                                                       |
| Proline directed fragmentation pattern | 6/8          | NOTE: S-P is a low abundance fragmentation.<br>PASS: y29> y28 with ratio 12.9<br/><br>PASS: b4-98< b3-98<br/><br>NOTE: P-P is a low abundance fragmentation.<br>PASS: y28> y27 with ratio 1.50<br/><br>No proline ions at b5-98<br/><br>FAIL: y22< y21<br/>No proline ions at b11-98<br/><br>NOTE: P-P is a low abundance fragmentation.<br>PASS: y21> y20 with ratio 1.14<br/><br>No proline ions at b12-98<br/><br>PASS: y12> y11<br/><br>FAIL: b21-98> b20-98<br/>NOTE: P-P is a low abundance fragmentation.<br>No proline ions at y11<br>PASS: b22-98< b21-98 with ratio 10.0<br/>                                                                        |
| PhosphoTyrosine transition present     | 0/0          | 0 of 0 phosphotyrosine transitions were found.                                                                                                                                                                                                                                                                                                                                                                                                                                                                                                                                                                                                                 |
| Six of top ten ions identified         | 9/6          | ion 1 (mass: 1012.706: intensity: 25392.58)<br>assigned 1 times<br>ion 2 (mass: 1518.512: intensity: 14491.22)<br>assigned 2 times<br>ion 3 (mass: 850.632: intensity: 4395.84)<br>assigned 1 times<br>ion 4 (mass: 1700.258: intensity: 4395.84)<br>assigned 1 times<br>ion 5 (mass: 2221.642: intensity: 3869.37)<br>assigned 3 times<br>ion 6 (mass: 1111.324: intensity: 3869.37)<br>assigned 4 times<br>ion 7 (mass: 1007.009: intensity: 3111.19)<br>assigned 0 times<br>ion 8 (mass: 2445.887: intensity: 1965.96)<br>assigned 1 times<br>ion 9 (mass: 1223.447: intensity: 1965.96)<br>assigned 3 times<br>ion 10 (mass: 1285.287: intensity: 1771.18) |

|   |   |                  |
|---|---|------------------|
| - | - | assigned 2 times |
|---|---|------------------|

## Ion Table

76 ions assigned of 157 ions above threshold (48%).

N-terminal ions

| AA | N-ion | b                                              | b*                             | b-98                                           | bo                            |
|----|-------|------------------------------------------------|--------------------------------|------------------------------------------------|-------------------------------|
| K  | 1     | 129.102                                        | 112.076                        | -                                              | 111.092                       |
| M  | 2     | 260.143                                        | 243.116                        | -                                              | 242.132                       |
| s  | 3     | 427.141<br>427.027 (0)                         | 410.115                        | 329.155<br>329.086 (0)                         | 409.131                       |
| P  | 4     | 524.194                                        | 507.167                        | 426.208                                        | 506.183                       |
| P  | 5     | 621.247                                        | 604.220                        | 523.261                                        | 603.236                       |
| C  | 6     | 781.277<br>391.385 [2+] (0)                    | 764.251                        | 683.291                                        | 763.267                       |
| I  | 7     | 894.361                                        | 877.335<br>439.366 [2+] (0)    | 796.375<br>796.412 (1)                         | 876.351                       |
| S  | 8     | 981.393                                        | 964.367                        | 883.408                                        | 963.383                       |
| I  | 9     | 1094.477                                       | 1077.451                       | 996.492                                        | 1076.467                      |
| E  | 10    | 1223.520<br>612.829 [2+] (0)<br>*1223.447 (7)  | 1206.494                       | 1125.534                                       | 1205.510                      |
| P  | 11    | 1320.573                                       | 1303.546                       | 1222.587                                       | 1302.562                      |
| P  | 12    | 1417.626                                       | 1400.599<br>*700.365 [2+] (0)  | 1319.640                                       | 1399.615<br>*700.365 [2+] (0) |
| T  | 13    | 1518.673<br>*1518.512 (57)                     | 1501.647                       | 1420.687<br>*1421.247 (2)                      | 1500.663                      |
| E  | 14    | 1647.716                                       | 1630.689                       | 1549.730                                       | 1629.705                      |
| D  | 15    | 1762.743<br>1762.620 (1)                       | 1745.716                       | 1664.757<br>*1664.652 (0)                      | 1744.732                      |
| E  | 16    | 1891.785<br>1892.015 (0)                       | 1874.759                       | 1793.800                                       | 1873.775                      |
| G  | 17    | 1948.807                                       | 1931.780                       | 1850.821                                       | 1930.796                      |
| S  | 18    | 2035.839<br>2036.335 (0)                       | 2018.812                       | 1937.853                                       | 2017.828                      |
| S  | 19    | 2122.871                                       | 2105.844                       | 2024.885<br>1012.706 [2+] (100)                | 2104.860                      |
| R  | 20    | 2278.972<br>*1139.844 [2+] (2)<br>2278.681 (2) | 2261.946                       | 2180.986                                       | 2260.962                      |
| P  | 21    | 2376.025                                       | 2358.998                       | 2278.039<br>*1139.844 [2+] (2)                 | 2358.014                      |
| P  | 22    | 2473.078                                       | 2456.051                       | 2375.092<br>2375.113 (0)                       | 2455.067                      |
| A  | 23    | 2544.115                                       | 2527.088                       | 2446.129<br>2445.887 (7)<br>*1223.447 [2+] (7) | 2526.104                      |
| A  | 24    | 2615.152                                       | 2598.125                       | 2517.166                                       | 2597.141                      |
| E  | 25    | 2744.194<br>2744.663 (2)<br>*1372.835 [2+] (2) | 2727.168                       | 2646.209<br>1323.624 [2+] (1)                  | 2726.184                      |
| G  | 26    | 2801.216<br>2801.391 (0)                       | 2784.189                       | 2703.230                                       | 2783.205                      |
| G  | 27    | 2858.237                                       | 2841.211<br>*1421.247 [2+] (2) | 2760.252                                       | 2840.227                      |
| N  | 28    | 2972.280                                       | 2955.254                       | 2874.294                                       | 2954.270                      |
| T  | 29    | 3073.328                                       | 3056.301                       | 2975.342                                       | 3055.317                      |



|   |    |          |          |          |              |
|---|----|----------|----------|----------|--------------|
| - | -  | -        | -        | -        | 3055.418 (0) |
| T | 30 | 3174.376 | 3157.349 | 3076.390 | 3156.365     |
| L | 31 | 3287.460 | 3270.433 | 3189.474 | 3269.449     |
| R | 32 | -        | -        | -        | -            |

### C-terminal ions

| AA | C-ion | y                                                              | y*                                                | y-98                           | yo                                                |
|----|-------|----------------------------------------------------------------|---------------------------------------------------|--------------------------------|---------------------------------------------------|
| K  | 32    | -                                                              | -                                                 | -                              | -                                                 |
| M  | 31    | 3333.476                                                       | 3316.450                                          | 3235.491                       | 3315.466                                          |
| s  | 30    | 3202.436<br>*1601.965 [2+] (2)                                 | 3185.409                                          | 3104.450<br>*1553.136 [2+] (5) | 3184.425                                          |
| P  | 29    | 3035.438<br>*1518.512 [2+] (57)                                | 3018.411<br>*3018.383 (6)<br>*1509.695 [2+] (6)   | -                              | 3017.427<br>*1509.695 [2+] (6)                    |
| P  | 28    | 2938.385<br>1470.014 [2+] (4)                                  | 2921.358                                          | -                              | 2920.374<br>2920.429 (0)                          |
| C  | 27    | 2841.332<br>*1421.247 [2+] (2)                                 | 2824.306<br>*1412.260 [2+] (0)                    | -                              | 2823.322<br>*1412.260 [2+] (0)                    |
| I  | 26    | 2681.301<br>1341.401 [2+] (5)<br>2681.795 (5)                  | 2664.275<br>*2663.816 (1)                         | -                              | 2663.291<br>*2663.816 (1)                         |
| S  | 25    | 2568.217<br>*1284.577 [2+] (5)<br>2568.147 (5)                 | 2551.191                                          | -                              | 2550.207                                          |
| I  | 24    | 2481.185<br>2481.066 (2)                                       | 2464.159<br>*2463.911 (0)                         | -                              | 2463.175                                          |
| E  | 23    | 2368.101<br>2368.206 (2)<br>1184.607 [2+] (2)                  | 2351.075<br>*1175.712 [2+] (5)                    | -                              | 2350.091<br>*1175.712 [2+] (5)<br>2350.416 (5)    |
| P  | 22    | 2239.059                                                       | 2222.032<br>*2221.642 (15)<br>*1111.324 [2+] (15) | -                              | 2221.048<br>*2221.642 (15)<br>*1111.324 [2+] (15) |
| P  | 21    | 2142.006<br>2142.478 (5)<br>1071.743 [2+] (5)                  | 2124.979<br>*2125.219 (0)                         | -                              | 2123.995                                          |
| T  | 20    | 2044.953<br>1023.236 [2+] (4)                                  | 2027.927                                          | -                              | 2026.943                                          |
| E  | 19    | 1943.905                                                       | 1926.879                                          | -                              | 1925.895                                          |
| D  | 18    | 1814.863<br>908.235 [2+] (3)<br>1815.463 (3)                   | 1797.836<br>*899.454 [2+] (0)<br>*1797.901 (0)    | -                              | 1796.852<br>*899.454 [2+] (0)                     |
| E  | 17    | 1699.836<br>850.632 [2+] (17)<br>1700.258 (17)<br>1699.776 (0) | 1682.809<br>*841.662 [2+] (5)                     | -                              | 1681.825<br>*841.662 [2+] (5)<br>1681.975 (0)     |
| G  | 16    | 1570.793<br>1570.933 (1)<br>785.945 [2+] (3)                   | 1553.767<br>*1553.808 (1)                         | -                              | 1552.783<br>*1553.136 (5)                         |
| S  | 15    | 1513.772                                                       | 1496.745                                          | -                              | 1495.761                                          |
| S  | 14    | 1426.740<br>714.037 [2+] (0)                                   | 1409.713                                          | -                              | 1408.729                                          |
| R  | 13    | 1339.708<br>1339.341 (2)                                       | 1322.681                                          | -                              | 1321.697                                          |
| P  | 12    | 1183.607<br>592.428 [2+] (0)<br>1183.660 (5)                   | 1166.580                                          | -                              | 1165.596                                          |
| P  | 11    | 1086.554                                                       | 1069.527                                          | -                              | 1068.543                                          |
| A  | 10    | 989.501                                                        | 972.475                                           | -                              | 971.491                                           |
| A  | 9     | 918.464<br>918.177 (0)                                         | 901.437                                           | -                              | 900.453<br>450.183 [2+] (0)                       |

|   |   |                         |         |   |                         |
|---|---|-------------------------|---------|---|-------------------------|
| E | 8 | 847.427                 | 830.400 | - | 829.416                 |
| G | 7 | 718.384<br>*718.269 (3) | 701.358 | - | 700.374<br>*700.365 (0) |
| G | 6 | 661.363                 | 644.336 | - | 643.352                 |
| N | 5 | 604.341                 | 587.315 | - | 586.331                 |
| T | 4 | 490.298<br>490.222 (0)  | 473.272 | - | 472.288                 |
| T | 3 | 389.251                 | 372.224 | - | 371.240                 |
| L | 2 | 288.203                 | 271.177 | - | 270.193                 |
| R | 1 | 175.119                 | 158.092 | - | 157.108                 |

### Ion distribution

| Threshold | Ion count | Matches | % matched |
|-----------|-----------|---------|-----------|
| 0         | 158       | 76      | 48        |
| 0.5       | 113       | 61      | 53        |
| 1         | 91        | 48      | 52        |
| 2         | 57        | 39      | 68        |
| 3         | 41        | 29      | 70        |
| 4         | 28        | 24      | 85        |
| 5         | 25        | 22      | 88        |
| 10        | 7         | 6       | 85        |

### Observed ions > 1%

| m/z      | Intensity             | % max | Assignment (delta)                                   |
|----------|-----------------------|-------|------------------------------------------------------|
| 649.366  | 616.11 <sub>1</sub>   | 2.42  |                                                      |
| 718.269  | 976.16 <sub>1</sub>   | 3.84  | c12[2+] (0.43) : y7 (-0.11)                          |
| 719.430  | 447.03 <sub>1</sub>   | 1.76  |                                                      |
| 736.467  | 332.42 <sub>1</sub>   | 1.30  | a6* (0.21) : a13o[2+] (-0.37)                        |
| 785.945  | 1013.76 <sub>1</sub>  | 3.99  | y16[2+] (0.04)                                       |
| 786.700  | 471.75 <sub>1</sub>   | 1.85  |                                                      |
| 796.412  | 258.49 <sub>1</sub>   | 1.01  | b7-98 (0.03)                                         |
| 797.419  | 808.35 <sub>1</sub>   | 3.18  |                                                      |
| 814.547  | 304.35 <sub>1</sub>   | 1.19  |                                                      |
| 823.395  | 281.81 <sub>1</sub>   | 1.10  |                                                      |
| 841.662  | 1292.58 <sub>1</sub>  | 5.09  | y17o[2+] (0.24) : y17*[2+] (-0.24) : z17[2+] (-0.24) |
| 850.632  | 4395.84 <sub>1</sub>  | 17.31 | y17[2+] (0.20)                                       |
| 908.235  | 933.35 <sub>1</sub>   | 3.67  | y18[2+] (0.29)                                       |
| 917.293  | 263.98 <sub>1</sub>   | 1.03  |                                                      |
| 951.402  | 808.63 <sub>1</sub>   | 3.18  | a17o[2+] (-0.50)                                     |
| 997.350  | 534.63 <sub>1</sub>   | 2.10  |                                                      |
| 1007.009 | 3111.19 <sub>1</sub>  | 12.25 |                                                      |
| 1012.706 | 25392.58 <sub>1</sub> | 100   | b19-98[2+] (-0.24)                                   |
| 1023.236 | 1198.59 <sub>1</sub>  | 4.72  | y20[2+] (0.25)                                       |

|          |                       |       |                                                                   |
|----------|-----------------------|-------|-------------------------------------------------------------------|
| 1035.899 | 814.66 <sub>3</sub>   | 3.20  |                                                                   |
| 1071.743 | 1370.74 <sub>3</sub>  | 5.39  | y21[2+] (0.23)                                                    |
| 1079.557 | 943.01 <sub>3</sub>   | 3.71  |                                                                   |
| 1110.320 | 1710.58 <sub>3</sub>  | 6.73  |                                                                   |
| 1111.324 | 3869.37 <sub>3</sub>  | 15.23 | y22o[2+] (0.29) : c9 (-0.18) : y22*[2+] (-0.19) : z22[2+] (-0.19) |
| 1112.315 | 1007.31 <sub>3</sub>  | 3.96  |                                                                   |
| 1139.844 | 734.88 <sub>3</sub>   | 2.89  | b21-98[2+] (0.32) : b20[2+] (-0.14)                               |
| 1143.152 | 629.95 <sub>3</sub>   | 2.48  |                                                                   |
| 1175.712 | 1343.87 <sub>3</sub>  | 5.29  | y23o[2+] (0.16) : y23*[2+] (-0.32) : z23[2+] (-0.32)              |
| 1183.660 | 1351.38 <sub>3</sub>  | 5.32  | y12 (0.05)                                                        |
| 1184.607 | 699.86 <sub>3</sub>   | 2.75  | y23[2+] (0.05)                                                    |
| 1185.408 | 792.71 <sub>3</sub>   | 3.12  |                                                                   |
| 1223.447 | 1965.96 <sub>3</sub>  | 7.74  | a22[2+] (0.40) : b10 (-0.07) : b23-98[2+] (-0.12)                 |
| 1280.626 | 437.48 <sub>3</sub>   | 1.72  | c23[2+] (-0.44)                                                   |
| 1284.577 | 1483.41 <sub>3</sub>  | 5.84  | y25[2+] (-0.03) : a24o[2+] (-0.50)                                |
| 1285.287 | 1771.18 <sub>3</sub>  | 6.97  | a24o[2+] (0.20) : a24*[2+] (-0.28)                                |
| 1323.624 | 461.47 <sub>3</sub>   | 1.81  | b25-98[2+] (0.01)                                                 |
| 1339.341 | 627.79 <sub>3</sub>   | 2.47  | y13 (-0.36)                                                       |
| 1341.401 | 1313.81 <sub>3</sub>  | 5.17  | y26[2+] (0.24)                                                    |
| 1357.601 | 490.39 <sub>3</sub>   | 1.93  |                                                                   |
| 1372.835 | 535.14 <sub>3</sub>   | 2.10  | b25[2+] (0.23) : a12* (0.23)                                      |
| 1421.247 | 741.78 <sub>3</sub>   | 2.92  | b13-98 (0.55) : b27*[2+] (0.13) : y27[2+] (0.07)                  |
| 1422.120 | 422.32 <sub>3</sub>   | 1.66  |                                                                   |
| 1470.014 | 1115.79 <sub>3</sub>  | 4.39  | y28[2+] (0.31)                                                    |
| 1470.617 | 473.34 <sub>3</sub>   | 1.86  |                                                                   |
| 1509.695 | 1770.49 <sub>3</sub>  | 6.97  | y29o[2+] (0.47) : y29*[2+] (-0.01) : z29[2+] (-0.01)              |
| 1518.512 | 14491.22 <sub>3</sub> | 57.06 | y29[2+] (0.28) : b13 (-0.16)                                      |
| 1521.648 | 366.25 <sub>3</sub>   | 1.44  |                                                                   |
| 1522.332 | 348.31 <sub>3</sub>   | 1.37  |                                                                   |
| 1553.136 | 1501.50 <sub>3</sub>  | 5.91  | y30-98[2+] (0.40) : y16o (0.35)                                   |
| 1553.808 | 455.00 <sub>3</sub>   | 1.79  | y16* (0.04) : z16 (0.04)                                          |
| 1564.830 | 326.19 <sub>3</sub>   | 1.28  | a30o[2+] (0.14) : a30*[2+] (-0.35)                                |
| 1570.933 | 506.99 <sub>3</sub>   | 1.99  | y16 (0.13)                                                        |
| 1591.816 | 258.49 <sub>3</sub>   | 1.01  |                                                                   |
| 1601.965 | 628.08 <sub>3</sub>   | 2.47  | a14o (0.25) : y30[2+] (0.24)                                      |
| 1700.258 | 4395.84 <sub>3</sub>  | 17.31 | y17 (0.42)                                                        |
| 1700.905 | 275.02 <sub>3</sub>   | 1.08  |                                                                   |
| 1762.620 | 464.18 <sub>3</sub>   | 1.82  | b15 (-0.12)                                                       |
| 1763.802 | 265.68 <sub>3</sub>   | 1.04  |                                                                   |
| 1815.463 | 933.35 <sub>3</sub>   | 3.67  | y18 (0.59)                                                        |
| 1833.579 | 263.98 <sub>3</sub>   | 1.03  |                                                                   |
| 1901.796 | 808.63 <sub>3</sub>   | 3.18  |                                                                   |
| 1991.626 | 397.27 <sub>3</sub>   | 1.56  |                                                                   |

|          |                      |       |                                          |
|----------|----------------------|-------|------------------------------------------|
| 2055.933 | 334.35 <sub>,</sub>  | 1.31  |                                          |
| 2070.792 | 814.66 <sub>,</sub>  | 3.20  |                                          |
| 2082.697 | 444.03 <sub>,</sub>  | 1.74  |                                          |
| 2142.478 | 1370.74 <sub>,</sub> | 5.39  | y21 (0.47)                               |
| 2158.107 | 943.01 <sub>,</sub>  | 3.71  |                                          |
| 2177.422 | 450.12 <sub>,</sub>  | 1.77  |                                          |
| 2186.891 | 297.40 <sub>,</sub>  | 1.17  |                                          |
| 2221.642 | 3869.37 <sub>,</sub> | 15.23 | y22o (0.59) : y22* (-0.39) : z22 (-0.39) |
| 2272.913 | 641.69 <sub>,</sub>  | 2.52  |                                          |
| 2278.681 | 734.88 <sub>,</sub>  | 2.89  | b20 (-0.29)                              |
| 2280.723 | 586.60 <sub>,</sub>  | 2.31  |                                          |
| 2350.416 | 1343.87 <sub>,</sub> | 5.29  | y23o (0.32)                              |
| 2366.312 | 1351.38 <sub>,</sub> | 5.32  |                                          |
| 2368.206 | 699.86 <sub>,</sub>  | 2.75  | y23 (0.10)                               |
| 2445.887 | 1965.96 <sub>,</sub> | 7.74  | b23-98 (-0.24)                           |
| 2481.066 | 629.33 <sub>,</sub>  | 2.47  | y24 (-0.11)                              |
| 2482.534 | 610.80 <sub>,</sub>  | 2.40  |                                          |
| 2568.147 | 1483.41 <sub>,</sub> | 5.84  | y25 (-0.07)                              |
| 2647.916 | 326.74 <sub>,</sub>  | 1.28  |                                          |
| 2663.816 | 309.95 <sub>,</sub>  | 1.22  | y26o (0.52) : y26* (-0.45) : z26 (-0.45) |
| 2681.795 | 1313.81 <sub>,</sub> | 5.17  | y26 (0.49)                               |
| 2714.194 | 490.39 <sub>,</sub>  | 1.93  |                                          |
| 2744.663 | 535.14 <sub>,</sub>  | 2.10  | b25 (0.46)                               |
| 2939.021 | 1115.79 <sub>,</sub> | 4.39  |                                          |
| 2940.226 | 473.34 <sub>,</sub>  | 1.86  |                                          |
| 3000.306 | 276.24 <sub>,</sub>  | 1.08  |                                          |
| 3018.383 | 1770.49 <sub>,</sub> | 6.97  | y29* (-0.02) : z29 (-0.02)               |
| 3042.289 | 366.25 <sub>,</sub>  | 1.44  |                                          |
| 3087.449 | 259.26 <sub>,</sub>  | 1.02  |                                          |

S2200

# ProPhosSI MS/MS report

Mass: 1154.528853 Charge: 3+

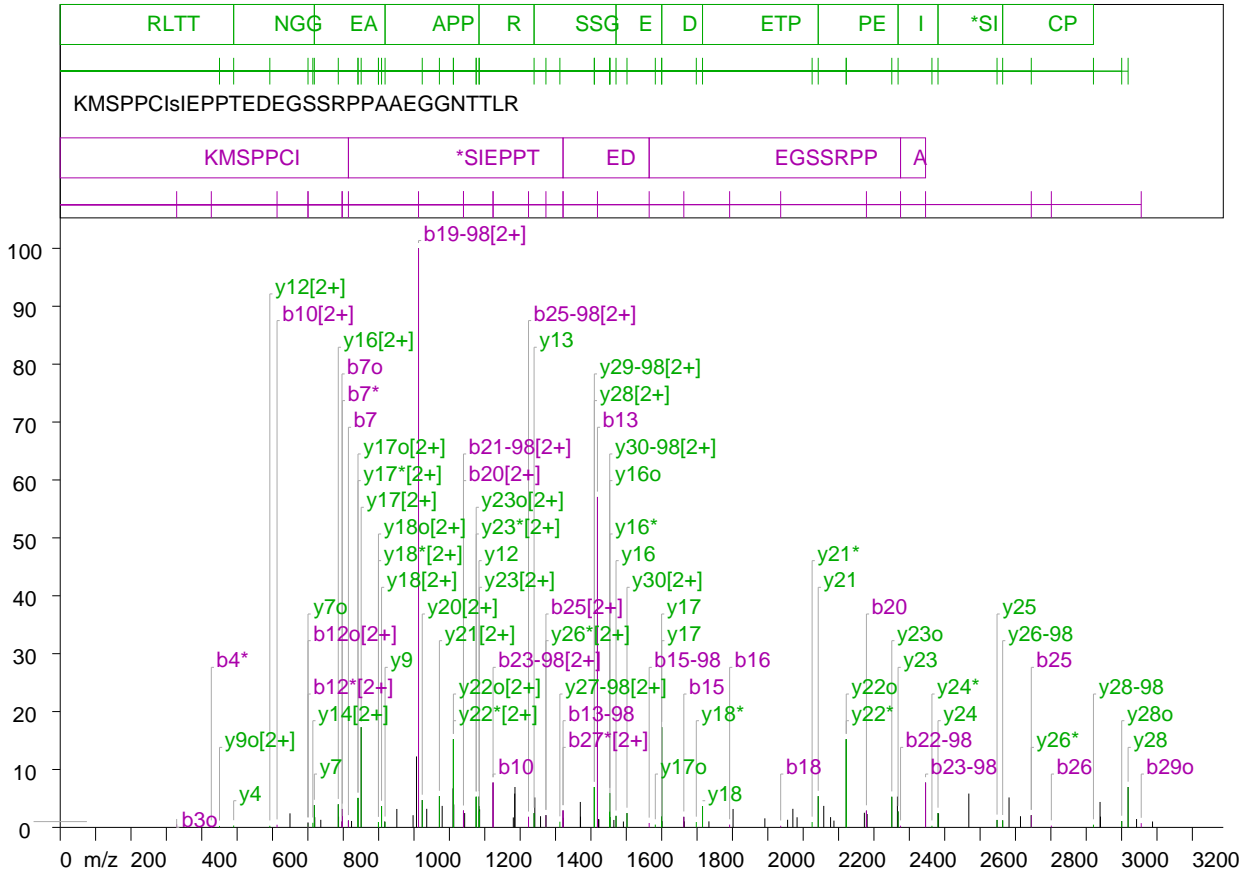

KMS  
b30

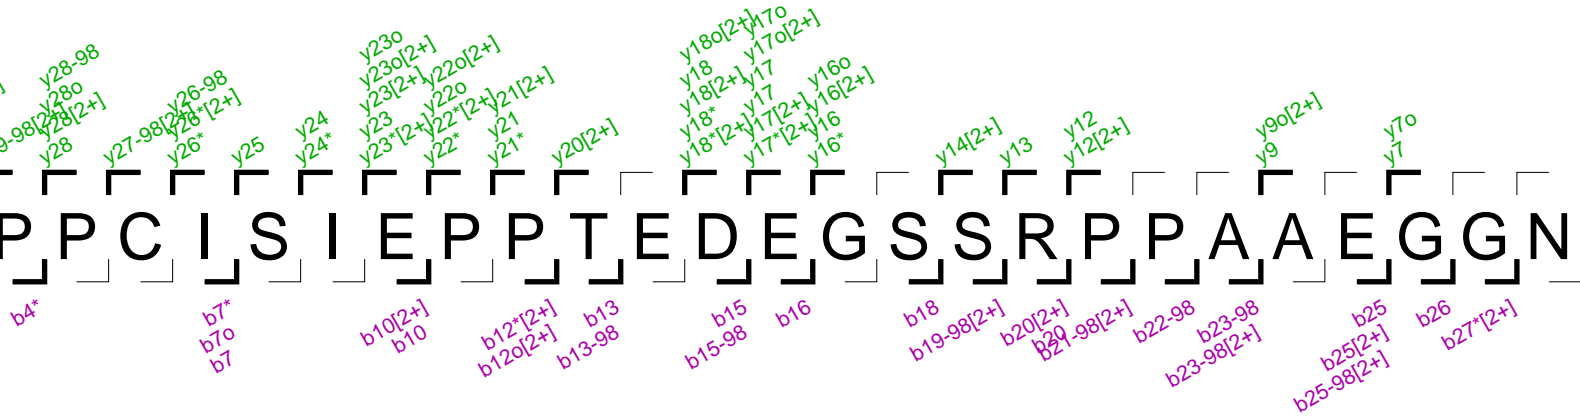

YLA  
TTLR  
b29o

## Cav3.2 Rat

(38) 2193 KMSPPCISIEPTEDEGSSRPPAAEGGNTTLR 2224 3460.564 (-0.0010) Da

|                         |     |
|-------------------------|-----|
| Parent Ion              | m/z |
| No parent ions observed |     |

### Modifications and supporting evidence

| Position | Residue ID | Modification | Evidence              |
|----------|------------|--------------|-----------------------|
| 8        | (2200)     | Phospho (ST) | y24 => y26-98, Y28-98 |

### Spectrum interpretation

| Rule                                   | passed/tests | Description                                                                                                                                                                                                                                                                                                                                                                                                                                                                                                                                                                                                                                                                        |
|----------------------------------------|--------------|------------------------------------------------------------------------------------------------------------------------------------------------------------------------------------------------------------------------------------------------------------------------------------------------------------------------------------------------------------------------------------------------------------------------------------------------------------------------------------------------------------------------------------------------------------------------------------------------------------------------------------------------------------------------------------|
| Parent ions present                    | 0/1          | Parent ions corresponding to the parent fragment - 1 phosphate ions were not found                                                                                                                                                                                                                                                                                                                                                                                                                                                                                                                                                                                                 |
| Three -98 Ions present                 | 1/1          | 12 des-phospho fragment ions were found.                                                                                                                                                                                                                                                                                                                                                                                                                                                                                                                                                                                                                                           |
| Unique -98 transitions present         | 1/1          | transition y24 to y26-98 support unique phosphorylation at position 8<br><br/>                                                                                                                                                                                                                                                                                                                                                                                                                                                                                                                                                                                                     |
| Four Sequential b or y ions            | 1/1          | Sequence of four y ions found from y26-98 to y29-98.                                                                                                                                                                                                                                                                                                                                                                                                                                                                                                                                                                                                                               |
| Five of six sequential ions present    | 1/1          | Five of Six ions found between y12 and y17<br>Five of Six ions found between y13 and y18<br>Five of Six ions found between y16 and y21<br>Five of Six ions found between y23 and y28<br>Five of Six ions found between y24 and y29<br>Five of Six ions found between y25 and y30<br>Five of Six ions found between y26 and y31                                                                                                                                                                                                                                                                                                                                                     |
| Proline directed fragmentation pattern | 4/7          | NOTE: S-P is a low abundance fragmentation.<br>PASS: y29-98> y28-98 with ratio 14.7<br/><br>No proline ions at b4<br/><br>NOTE: P-P is a low abundance fragmentation.<br>FAIL: y28-98< y27-98<br/>No proline ions at b5<br/><br>FAIL: y22< y21<br/>No proline ions at b11-98<br/><br>NOTE: P-P is a low abundance fragmentation.<br>PASS: y21> y20 with ratio 1.14<br/><br>No proline ions at b12-98<br/><br>PASS: y12> y11<br/><br>FAIL: b21-98> b20-98<br/>NOTE: P-P is a low abundance fragmentation.<br>No proline ions at y11<br>PASS: b22-98< b21-98 with ratio 10.0<br/>                                                                                                    |
| PhosphoTyrosine transition present     | 0/0          | 0 of 0 phosphotyrosine transitions were found.                                                                                                                                                                                                                                                                                                                                                                                                                                                                                                                                                                                                                                     |
| Six of top ten ions identified         | 9/6          | ion 1 (mass: 1012.706: intensity: 25392.58)<br>assigned 1 times<br>ion 2 (mass: 1518.512: intensity: 14491.22)<br>assigned 1 times<br>ion 3 (mass: 850.632: intensity: 4395.84)<br>assigned 1 times<br>ion 4 (mass: 1700.258: intensity: 4395.84)<br>assigned 1 times<br>ion 5 (mass: 2221.642: intensity: 3869.37)<br>assigned 3 times<br>ion 6 (mass: 1111.324: intensity: 3869.37)<br>assigned 4 times<br>ion 7 (mass: 1007.009: intensity: 3111.19)<br>assigned 0 times<br>ion 8 (mass: 2445.887: intensity: 1965.96)<br>assigned 1 times<br>ion 9 (mass: 1223.447: intensity: 1965.96)<br>assigned 3 times<br>ion 10 (mass: 1285.287: intensity: 1771.18)<br>assigned 2 times |

## Ion Table

75 ions assigned of 157 ions above threshold (47%).

N-terminal ions

| AA | N-ion | b                                               | b*                             | b-98                                           | bo                            |
|----|-------|-------------------------------------------------|--------------------------------|------------------------------------------------|-------------------------------|
| K  | 1     | 129.102                                         | 112.076                        | -                                              | 111.092                       |
| M  | 2     | 260.143                                         | 243.116                        | -                                              | 242.132                       |
| S  | 3     | 347.175                                         | 330.148                        | -                                              | 329.164<br>*329.086 (0)       |
| P  | 4     | 444.228                                         | 427.201<br>427.027 (0)         | -                                              | 426.217                       |
| P  | 5     | 541.280                                         | 524.254                        | -                                              | 523.270                       |
| C  | 6     | 701.311                                         | 684.284                        | -                                              | 683.300                       |
| I  | 7     | 814.395<br>814.547 (1)                          | 797.369<br>797.419 (3)         | -                                              | 796.385<br>796.412 (1)        |
| s  | 8     | 981.393                                         | 964.367                        | 883.408                                        | 963.383                       |
| I  | 9     | 1094.477                                        | 1077.451                       | 996.492                                        | 1076.467                      |
| E  | 10    | 1223.520<br>612.829 [2+] (0)<br>*1223.447 (7)   | 1206.494                       | 1125.534                                       | 1205.510                      |
| P  | 11    | 1320.573                                        | 1303.546                       | 1222.587                                       | 1302.562                      |
| P  | 12    | 1417.626                                        | 1400.599<br>*700.365 [2+] (0)  | 1319.640                                       | 1399.615<br>*700.365 [2+] (0) |
| T  | 13    | 1518.673<br>1518.512 (57)                       | 1501.647                       | 1420.687<br>*1421.247 (2)                      | 1500.663                      |
| E  | 14    | 1647.716                                        | 1630.689                       | 1549.730                                       | 1629.705                      |
| D  | 15    | 1762.743<br>1762.620 (1)                        | 1745.716                       | 1664.757<br>*1664.652 (0)                      | 1744.732                      |
| E  | 16    | 1891.785<br>1892.015 (0)                        | 1874.759                       | 1793.800                                       | 1873.775                      |
| G  | 17    | 1948.807                                        | 1931.780                       | 1850.821                                       | 1930.796                      |
| S  | 18    | 2035.839<br>2036.335 (0)                        | 2018.812                       | 1937.853                                       | 2017.828                      |
| S  | 19    | 2122.871                                        | 2105.844                       | 2024.885<br>1012.706 [2+] (100)                | 2104.860                      |
| R  | 20    | 2278.972<br>*1139.844 [2+] (2)<br>2278.681 (2)  | 2261.946                       | 2180.986                                       | 2260.962                      |
| P  | 21    | 2376.025                                        | 2358.998                       | 2278.039<br>*1139.844 [2+] (2)                 | 2358.014                      |
| P  | 22    | 2473.078                                        | 2456.051                       | 2375.092<br>2375.113 (0)                       | 2455.067                      |
| A  | 23    | 2544.115                                        | 2527.088                       | 2446.129<br>2445.887 (7)<br>*1223.447 [2+] (7) | 2526.104                      |
| A  | 24    | 2615.152                                        | 2598.125                       | 2517.166                                       | 2597.141                      |
| E  | 25    | 2744.194<br>*2744.663 (2)<br>*1372.835 [2+] (2) | 2727.168                       | 2646.209<br>1323.624 [2+] (1)                  | 2726.184                      |
| G  | 26    | 2801.216<br>2801.391 (0)                        | 2784.189                       | 2703.230                                       | 2783.205                      |
| G  | 27    | 2858.237                                        | 2841.211<br>*1421.247 [2+] (2) | 2760.252                                       | 2840.227                      |
| N  | 28    | 2972.280                                        | 2955.254                       | 2874.294                                       | 2954.270                      |
| T  | 29    | 3073.328                                        | 3056.301                       | 2975.342                                       | 3055.317<br>3055.418 (0)      |
| T  | 30    | 3174.376                                        | 3157.349                       | 3076.390                                       | 3156.365                      |
| L  | 31    | 3287.460                                        | 3270.433                       | 3189.474                                       | 3269.449                      |



|   |    |   |   |   |   |
|---|----|---|---|---|---|
| R | 32 | - | - | - | - |
|---|----|---|---|---|---|

### C-terminal ions

| AA | C-ion | y                                                              | y*                                                | y-98                           | yo                                                |
|----|-------|----------------------------------------------------------------|---------------------------------------------------|--------------------------------|---------------------------------------------------|
| K  | 32    | -                                                              | -                                                 | -                              | -                                                 |
| M  | 31    | 3333.476                                                       | 3316.450                                          | 3235.491                       | 3315.466                                          |
| S  | 30    | 3202.436<br>*1601.965 [2+] (2)                                 | 3185.409                                          | 3104.450<br>*1553.136 [2+] (5) | 3184.425                                          |
| P  | 29    | 3115.404                                                       | 3098.377                                          | 3017.418<br>*1509.695 [2+] (6) | 3097.393                                          |
| P  | 28    | 3018.351<br>3018.383 (6)<br>*1509.695 [2+] (6)                 | 3001.325                                          | 2920.365<br>2920.429 (0)       | 3000.341<br>3000.306 (1)                          |
| C  | 27    | 2921.298                                                       | 2904.272                                          | 2823.313<br>1412.260 [2+] (0)  | 2903.288                                          |
| I  | 26    | 2761.268                                                       | 2744.241<br>*2744.663 (2)<br>*1372.835 [2+] (2)   | 2663.282<br>2663.816 (1)       | 2743.257                                          |
| s  | 25    | 2648.184<br>2647.916 (1)                                       | 2631.157                                          | 2550.198                       | 2630.173                                          |
| I  | 24    | 2481.185<br>2481.066 (2)                                       | 2464.159<br>*2463.911 (0)                         | -                              | 2463.175                                          |
| E  | 23    | 2368.101<br>2368.206 (2)<br>1184.607 [2+] (2)                  | 2351.075<br>*1175.712 [2+] (5)                    | -                              | 2350.091<br>*1175.712 [2+] (5)<br>2350.416 (5)    |
| P  | 22    | 2239.059                                                       | 2222.032<br>*2221.642 (15)<br>*1111.324 [2+] (15) | -                              | 2221.048<br>*2221.642 (15)<br>*1111.324 [2+] (15) |
| P  | 21    | 2142.006<br>2142.478 (5)<br>1071.743 [2+] (5)                  | 2124.979<br>*2125.219 (0)                         | -                              | 2123.995                                          |
| T  | 20    | 2044.953<br>1023.236 [2+] (4)                                  | 2027.927                                          | -                              | 2026.943                                          |
| E  | 19    | 1943.905                                                       | 1926.879                                          | -                              | 1925.895                                          |
| D  | 18    | 1814.863<br>908.235 [2+] (3)<br>1815.463 (3)                   | 1797.836<br>*899.454 [2+] (0)<br>*1797.901 (0)    | -                              | 1796.852<br>*899.454 [2+] (0)                     |
| E  | 17    | 1699.836<br>850.632 [2+] (17)<br>1700.258 (17)<br>1699.776 (0) | 1682.809<br>*841.662 [2+] (5)                     | -                              | 1681.825<br>*841.662 [2+] (5)<br>1681.975 (0)     |
| G  | 16    | 1570.793<br>1570.933 (1)<br>*785.945 [2+] (3)                  | 1553.767<br>*1553.808 (1)                         | -                              | 1552.783<br>*1553.136 (5)                         |
| S  | 15    | 1513.772                                                       | 1496.745                                          | -                              | 1495.761                                          |
| S  | 14    | 1426.740<br>714.037 [2+] (0)                                   | 1409.713                                          | -                              | 1408.729                                          |
| R  | 13    | 1339.708<br>1339.341 (2)                                       | 1322.681                                          | -                              | 1321.697                                          |
| P  | 12    | 1183.607<br>592.428 [2+] (0)<br>1183.660 (5)                   | 1166.580                                          | -                              | 1165.596                                          |
| P  | 11    | 1086.554                                                       | 1069.527                                          | -                              | 1068.543                                          |
| A  | 10    | 989.501                                                        | 972.475                                           | -                              | 971.491                                           |
| A  | 9     | 918.464<br>918.177 (0)                                         | 901.437                                           | -                              | 900.453<br>450.183 [2+] (0)                       |
| E  | 8     | 847.427                                                        | 830.400                                           | -                              | 829.416                                           |
| G  | 7     | 718.384<br>*718.269 (3)                                        | 701.358                                           | -                              | 700.374<br>*700.365 (0)                           |
| G  | 6     | 661.363                                                        | 644.336                                           | -                              | 643.352                                           |

|   |   |                        |         |   |         |
|---|---|------------------------|---------|---|---------|
| N | 5 | 604.341                | 587.315 | - | 586.331 |
| T | 4 | 490.298<br>490.222 (0) | 473.272 | - | 472.288 |
| T | 3 | 389.251                | 372.224 | - | 371.240 |
| L | 2 | 288.203                | 271.177 | - | 270.193 |
| R | 1 | 175.119                | 158.092 | - | 157.108 |

### Ion distribution

| Threshold | Ion count | Matches | % matched |
|-----------|-----------|---------|-----------|
| 0         | 158       | 75      | 47        |
| 0.5       | 113       | 62      | 54        |
| 1         | 91        | 49      | 53        |
| 2         | 57        | 36      | 63        |
| 3         | 41        | 26      | 63        |
| 4         | 28        | 20      | 71        |
| 5         | 25        | 19      | 76        |
| 10        | 7         | 6       | 85        |

### Observed ions > 1%

| m/z      | Intensity             | % max | Assignment (delta)                                   |
|----------|-----------------------|-------|------------------------------------------------------|
| 649.366  | 616.11 <sub>s</sub>   | 2.42  |                                                      |
| 718.269  | 976.16 <sub>s</sub>   | 3.84  | c12[2+] (0.43) : c6 (-0.06) : y7 (-0.11)             |
| 719.430  | 447.03 <sub>s</sub>   | 1.76  |                                                      |
| 736.467  | 332.42 <sub>s</sub>   | 1.30  | a13o[2+] (-0.37)                                     |
| 785.945  | 1013.76 <sub>s</sub>  | 3.99  | y16[2+] (0.04) : a7 (-0.45)                          |
| 786.700  | 471.75 <sub>s</sub>   | 1.85  | a7 (0.29)                                            |
| 796.412  | 258.49 <sub>s</sub>   | 1.01  | b7o (0.02)                                           |
| 797.419  | 808.35 <sub>s</sub>   | 3.18  | b7* (0.04)                                           |
| 814.547  | 304.35 <sub>s</sub>   | 1.19  | b7 (0.15)                                            |
| 823.395  | 281.81 <sub>s</sub>   | 1.10  |                                                      |
| 841.662  | 1292.58 <sub>s</sub>  | 5.09  | y17o[2+] (0.24) : y17*[2+] (-0.24) : z17[2+] (-0.24) |
| 850.632  | 4395.84 <sub>s</sub>  | 17.31 | y17[2+] (0.20)                                       |
| 908.235  | 933.35 <sub>s</sub>   | 3.67  | y18[2+] (0.29)                                       |
| 917.293  | 263.98 <sub>s</sub>   | 1.03  |                                                      |
| 951.402  | 808.63 <sub>s</sub>   | 3.18  | a17o[2+] (-0.50)                                     |
| 997.350  | 534.63 <sub>s</sub>   | 2.10  |                                                      |
| 1007.009 | 3111.19 <sub>s</sub>  | 12.25 |                                                      |
| 1012.706 | 25392.58 <sub>s</sub> | 100   | b19-98[2+] (-0.24)                                   |
| 1023.236 | 1198.59 <sub>s</sub>  | 4.72  | y20[2+] (0.25)                                       |
| 1035.899 | 814.66 <sub>s</sub>   | 3.20  |                                                      |
| 1071.743 | 1370.74 <sub>s</sub>  | 5.39  | y21[2+] (0.23)                                       |
| 1079.557 | 943.01 <sub>s</sub>   | 3.71  |                                                      |
| 1110.320 | 1710.58 <sub>s</sub>  | 6.73  |                                                      |

|          |                       |       |                                                                   |
|----------|-----------------------|-------|-------------------------------------------------------------------|
| 1111.324 | 3869.37 <sub>5</sub>  | 15.23 | y22o[2+] (0.29) : c9 (-0.18) : y22*[2+] (-0.19) : z22[2+] (-0.19) |
| 1112.315 | 1007.31 <sub>5</sub>  | 3.96  |                                                                   |
| 1139.844 | 734.88 <sub>5</sub>   | 2.89  | b21-98[2+] (0.32) : b20[2+] (-0.14)                               |
| 1143.152 | 629.95 <sub>5</sub>   | 2.48  |                                                                   |
| 1175.712 | 1343.87 <sub>5</sub>  | 5.29  | y23o[2+] (0.16) : y23*[2+] (-0.32) : z23[2+] (-0.32)              |
| 1183.660 | 1351.38 <sub>5</sub>  | 5.32  | y12 (0.05)                                                        |
| 1184.607 | 699.86 <sub>5</sub>   | 2.75  | y23[2+] (0.05)                                                    |
| 1185.408 | 792.71 <sub>5</sub>   | 3.12  |                                                                   |
| 1223.447 | 1965.96 <sub>5</sub>  | 7.74  | a22[2+] (0.40) : b10 (-0.07) : b23-98[2+] (-0.12)                 |
| 1280.626 | 437.48 <sub>5</sub>   | 1.72  | c23[2+] (-0.44)                                                   |
| 1284.577 | 1483.41 <sub>5</sub>  | 5.84  | a24o[2+] (-0.50)                                                  |
| 1285.287 | 1771.18 <sub>5</sub>  | 6.97  | a24o[2+] (0.20) : a24*[2+] (-0.28)                                |
| 1323.624 | 461.47 <sub>5</sub>   | 1.81  | b25-98[2+] (0.01)                                                 |
| 1339.341 | 627.79 <sub>5</sub>   | 2.47  | y13 (-0.36)                                                       |
| 1341.401 | 1313.81 <sub>5</sub>  | 5.17  |                                                                   |
| 1357.601 | 490.39 <sub>5</sub>   | 1.93  |                                                                   |
| 1372.835 | 535.14 <sub>5</sub>   | 2.10  | b25[2+] (0.23) : a12* (0.23) : y26*[2+] (0.21) : z26[2+] (0.21)   |
| 1421.247 | 741.78 <sub>5</sub>   | 2.92  | b13-98 (0.55) : b27*[2+] (0.13)                                   |
| 1422.120 | 422.32 <sub>5</sub>   | 1.66  |                                                                   |
| 1470.014 | 1115.79 <sub>5</sub>  | 4.39  |                                                                   |
| 1470.617 | 473.34 <sub>5</sub>   | 1.86  |                                                                   |
| 1509.695 | 1770.49 <sub>5</sub>  | 6.97  | y29-98[2+] (0.48) : y28[2+] (0.01)                                |
| 1518.512 | 14491.22 <sub>5</sub> | 57.06 | b13 (-0.16)                                                       |
| 1521.648 | 366.25 <sub>5</sub>   | 1.44  |                                                                   |
| 1522.332 | 348.31 <sub>5</sub>   | 1.37  |                                                                   |
| 1553.136 | 1501.50 <sub>5</sub>  | 5.91  | y30-98[2+] (0.40) : y16o (0.35)                                   |
| 1553.808 | 455.00 <sub>5</sub>   | 1.79  | y16* (0.04) : z16 (0.04)                                          |
| 1564.830 | 326.19 <sub>5</sub>   | 1.28  | a30o[2+] (0.14) : a30*[2+] (-0.35)                                |
| 1570.933 | 506.99 <sub>5</sub>   | 1.99  | y16 (0.13)                                                        |
| 1591.816 | 258.49 <sub>5</sub>   | 1.01  |                                                                   |
| 1601.965 | 628.08 <sub>5</sub>   | 2.47  | a14o (0.25) : y30[2+] (0.24)                                      |
| 1700.258 | 4395.84 <sub>5</sub>  | 17.31 | y17 (0.42)                                                        |
| 1700.905 | 275.02 <sub>5</sub>   | 1.08  |                                                                   |
| 1762.620 | 464.18 <sub>5</sub>   | 1.82  | b15 (-0.12)                                                       |
| 1763.802 | 265.68 <sub>5</sub>   | 1.04  |                                                                   |
| 1815.463 | 933.35 <sub>5</sub>   | 3.67  | y18 (0.59)                                                        |
| 1833.579 | 263.98 <sub>5</sub>   | 1.03  |                                                                   |
| 1901.796 | 808.63 <sub>5</sub>   | 3.18  |                                                                   |
| 1991.626 | 397.27 <sub>5</sub>   | 1.56  |                                                                   |
| 2055.933 | 334.35 <sub>5</sub>   | 1.31  |                                                                   |
| 2070.792 | 814.66 <sub>5</sub>   | 3.20  |                                                                   |
| 2082.697 | 444.03 <sub>5</sub>   | 1.74  |                                                                   |
| 2142.478 | 1370.74 <sub>5</sub>  | 5.39  | y21 (0.47)                                                        |

|          |                      |       |                                          |
|----------|----------------------|-------|------------------------------------------|
| 2158.107 | 943.01 <sub>3</sub>  | 3.71  |                                          |
| 2177.422 | 450.12 <sub>3</sub>  | 1.77  |                                          |
| 2186.891 | 297.40 <sub>3</sub>  | 1.17  |                                          |
| 2221.642 | 3869.37 <sub>3</sub> | 15.23 | y22o (0.59) : y22* (-0.39) : z22 (-0.39) |
| 2272.913 | 641.69 <sub>3</sub>  | 2.52  |                                          |
| 2278.681 | 734.88 <sub>3</sub>  | 2.89  | b20 (-0.29)                              |
| 2280.723 | 586.60 <sub>3</sub>  | 2.31  |                                          |
| 2350.416 | 1343.87 <sub>3</sub> | 5.29  | y23o (0.32)                              |
| 2366.312 | 1351.38 <sub>3</sub> | 5.32  |                                          |
| 2368.206 | 699.86 <sub>3</sub>  | 2.75  | y23 (0.10)                               |
| 2445.887 | 1965.96 <sub>3</sub> | 7.74  | b23-98 (-0.24)                           |
| 2481.066 | 629.33 <sub>3</sub>  | 2.47  | y24 (-0.11)                              |
| 2482.534 | 610.80 <sub>3</sub>  | 2.40  |                                          |
| 2568.147 | 1483.41 <sub>3</sub> | 5.84  |                                          |
| 2647.916 | 326.74 <sub>3</sub>  | 1.28  | y25 (-0.26)                              |
| 2663.816 | 309.95 <sub>3</sub>  | 1.22  | y26-98 (0.53)                            |
| 2681.795 | 1313.81 <sub>3</sub> | 5.17  |                                          |
| 2714.194 | 490.39 <sub>3</sub>  | 1.93  |                                          |
| 2744.663 | 535.14 <sub>3</sub>  | 2.10  | b25 (0.46) : y26* (0.42) : z26 (0.42)    |
| 2939.021 | 1115.79 <sub>3</sub> | 4.39  |                                          |
| 2940.226 | 473.34 <sub>3</sub>  | 1.86  |                                          |
| 3000.306 | 276.24 <sub>3</sub>  | 1.08  | y28o (-0.03)                             |
| 3018.383 | 1770.49 <sub>3</sub> | 6.97  | y28 (0.03)                               |
| 3042.289 | 366.25 <sub>3</sub>  | 1.44  |                                          |
| 3087.449 | 259.26 <sub>3</sub>  | 1.02  |                                          |

S2354

# ProPhosSI MS/MS report

Mass: 959.409976 Charge: 2+

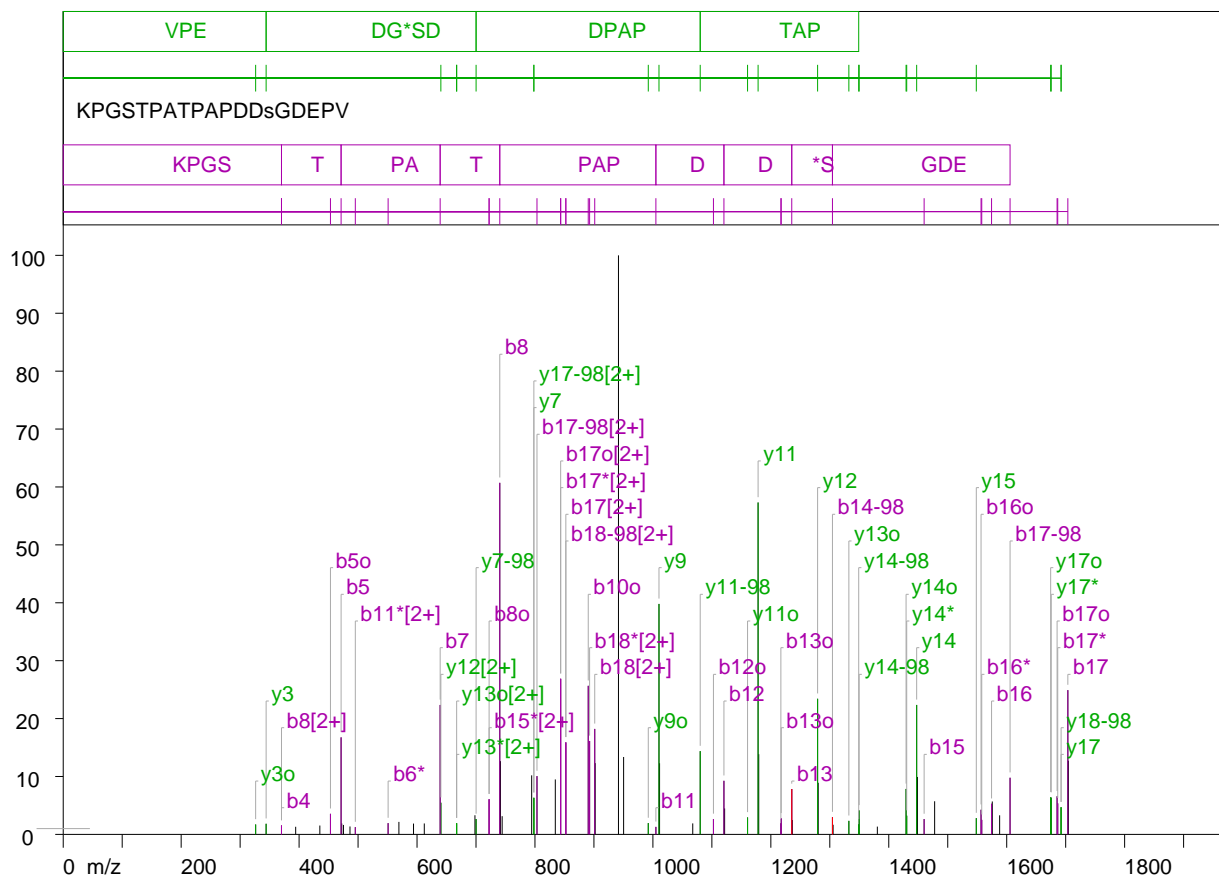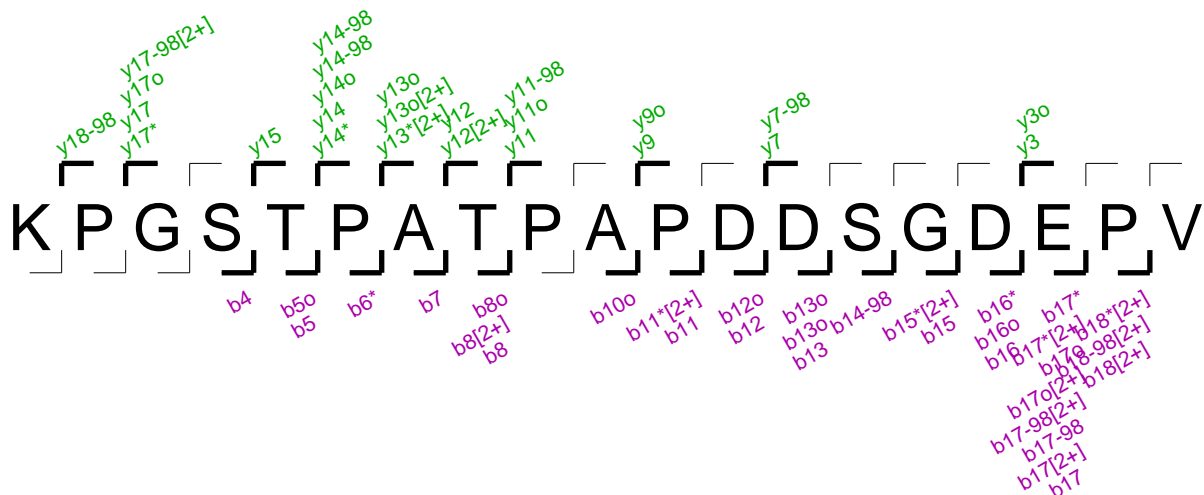

## Cav3.2 Rat

(55) 2341 KPGSTPATPAPDDsGDEPV 2359 1916.804 (0.0001) Da

|                         |     |
|-------------------------|-----|
| Parent Ion              | m/z |
| No parent ions observed |     |

### Modifications and supporting evidence

| Position | Residue ID | Modification | Evidence      |
|----------|------------|--------------|---------------|
| 14       | (2354)     | Phospho (ST) | b13 => b14-98 |

### Spectrum interpretation

| Rule                                   | passed/tests | Description                                                                                                                                                                                                                                                                                                                                                                                                                                                                                                                                                                                                                                    |
|----------------------------------------|--------------|------------------------------------------------------------------------------------------------------------------------------------------------------------------------------------------------------------------------------------------------------------------------------------------------------------------------------------------------------------------------------------------------------------------------------------------------------------------------------------------------------------------------------------------------------------------------------------------------------------------------------------------------|
| Parent ions present                    | 0/1          | Parent ions corresponding to the parent fragment - 1 phosphate ions were not found                                                                                                                                                                                                                                                                                                                                                                                                                                                                                                                                                             |
| Three -98 Ions present                 | 1/1          | 8 des-phospho fragment ions were found.                                                                                                                                                                                                                                                                                                                                                                                                                                                                                                                                                                                                        |
| Unique -98 transitions present         | 1/1          | transition b13 to b14-98, transition y3 to y7-98 support unique phosphorylation at position 14<br><br/>                                                                                                                                                                                                                                                                                                                                                                                                                                                                                                                                        |
| Four Sequential b or y ions            | 1/1          | Sequence of four b ions found from b11 to b14-98.                                                                                                                                                                                                                                                                                                                                                                                                                                                                                                                                                                                              |
| Five of six sequential ions present    | 0/1          |                                                                                                                                                                                                                                                                                                                                                                                                                                                                                                                                                                                                                                                |
| Proline directed fragmentation pattern | 4/7          | FAIL: y18-98< y17-98<br/>No proline ions at b2<br/><br>PASS: y14-98> y13-98<br/><br>PASS: b6< b5<br/><br>PASS: y11-98> y10-98<br/><br>PASS: b9< b8<br/><br>No proline ions at y9-98<br>FAIL: b11> b10<br/>No proline ions at y2<br>FAIL: b18-98> b17-98<br/>                                                                                                                                                                                                                                                                                                                                                                                   |
| PhosphoTyrosine transition present     | 0/0          | 0 of 0 phosphotyrosine transitions were found.                                                                                                                                                                                                                                                                                                                                                                                                                                                                                                                                                                                                 |
| Six of top ten ions identified         | 10/6         | ion 1 (mass: 941.596: intensity: 8488.11) assigned 1 times<br>ion 2 (mass: 740.307: intensity: 5153.71) assigned 1 times<br>ion 3 (mass: 1178.399: intensity: 4864.95) assigned 1 times<br>ion 4 (mass: 1010.306: intensity: 3378.38) assigned 1 times<br>ion 5 (mass: 843.574: intensity: 2281.21) assigned 2 times<br>ion 6 (mass: 890.364: intensity: 2177.98) assigned 1 times<br>ion 7 (mass: 1703.672: intensity: 2114.64) assigned 1 times<br>ion 8 (mass: 1279.321: intensity: 1987.98) assigned 1 times<br>ion 9 (mass: 1447.320: intensity: 1897.55) assigned 1 times<br>ion 10 (mass: 639.247: intensity: 1897.42) assigned 1 times |

### Ion Table

54 ions assigned of 80 ions above threshold (67%).

#### N-terminal ions

| AA | N-ion | b       | b*      | b-98 | bo      |
|----|-------|---------|---------|------|---------|
| K  | 1     | 129.102 | 112.076 | -    | 111.092 |
| P  | 2     | 226.155 | 209.129 | -    | 208.145 |

|   |    |                                                 |                                                |                                               |                                                |
|---|----|-------------------------------------------------|------------------------------------------------|-----------------------------------------------|------------------------------------------------|
| G | 3  | 283.177                                         | 266.150                                        | -                                             | 265.166                                        |
| S | 4  | 370.209<br>*370.135 (1)                         | 353.182                                        | -                                             | 352.198                                        |
| T | 5  | 471.256<br>*471.218 (16)                        | 454.230                                        | -                                             | 453.246<br>453.163 (3)                         |
| P | 6  | 568.309                                         | 551.282<br>550.984 (1)                         | -                                             | 550.298                                        |
| A | 7  | 639.346<br>639.247 (22)                         | 622.320                                        | -                                             | 621.336                                        |
| T | 8  | 740.394<br>*370.135 [2+] (1)<br>740.307 (60)    | 723.367                                        | -                                             | 722.383<br>*722.219 (6)                        |
| P | 9  | 837.447                                         | 820.420                                        | -                                             | 819.436                                        |
| A | 10 | 908.484                                         | 891.457                                        | -                                             | 890.473<br>890.364 (25)                        |
| P | 11 | 1005.536<br>1005.058 (1)                        | 988.510<br>495.338 [2+] (1)                    | -                                             | 987.526                                        |
| D | 12 | 1120.563<br>1120.455 (9)                        | 1103.537                                       | -                                             | 1102.553<br>1102.671 (2)                       |
| D | 13 | 1235.590<br>1235.503 (7)                        | 1218.564                                       | -                                             | 1217.580<br>1217.030 (1)<br>1217.635 (2)       |
| s | 14 | 1402.589                                        | 1385.562                                       | 1304.603<br>1304.490 (2)                      | 1384.578                                       |
| G | 15 | 1459.610<br>1459.954 (2)                        | 1442.584<br>*722.219 [2+] (6)                  | 1361.624                                      | 1441.600                                       |
| D | 16 | 1574.637<br>1574.307 (5)                        | 1557.611<br>1557.677 (2)                       | 1476.651                                      | 1556.627<br>1556.475 (4)                       |
| E | 17 | 1703.680<br>*852.374 [2+] (15)<br>1703.672 (24) | 1686.653<br>1686.540 (5)<br>*843.574 [2+] (26) | 1605.694<br>803.411 [2+] (10)<br>1605.698 (9) | 1685.669<br>1685.463 (6)<br>*843.574 [2+] (26) |
| P | 18 | 1800.732<br>901.358 [2+] (18)                   | 1783.706<br>892.649 [2+] (16)                  | 1702.747<br>*852.374 [2+] (15)                | 1782.722                                       |
| V | 19 | -                                               | -                                              | -                                             | -                                              |

### C-terminal ions

| AA | C-ion | y                                             | y*                            | y-98                                     | yo                                            |
|----|-------|-----------------------------------------------|-------------------------------|------------------------------------------|-----------------------------------------------|
| K  | 19    | -                                             | -                             | -                                        | -                                             |
| P  | 18    | 1789.717                                      | 1772.690                      | 1691.731<br>*1692.226 (4)                | 1771.706                                      |
| G  | 17    | 1692.664<br>*1692.226 (4)                     | 1675.637<br>*1675.488 (6)     | 1594.678<br>*798.109 [2+] (6)            | 1674.653<br>1674.552 (6)                      |
| S  | 16    | 1635.642                                      | 1618.616                      | 1537.656                                 | 1617.632                                      |
| T  | 15    | 1548.610<br>1548.435 (2)                      | 1531.584                      | 1450.624                                 | 1530.600                                      |
| P  | 14    | 1447.563<br>1447.320 (22)                     | 1430.536<br>*1430.421 (3)     | 1349.577<br>1348.997 (1)<br>1349.804 (4) | 1429.552<br>1429.369 (7)                      |
| A  | 13    | 1350.510                                      | 1333.483<br>*667.196 [2+] (1) | 1252.524                                 | 1332.499<br>*667.196 [2+] (1)<br>1332.316 (2) |
| T  | 12    | 1279.473<br>640.397 [2+] (5)<br>1279.321 (23) | 1262.446                      | 1181.487                                 | 1261.462                                      |
| P  | 11    | 1178.425<br>1178.399 (57)                     | 1161.398                      | 1080.439<br>1080.222 (14)                | 1160.414<br>1160.517 (2)                      |
| A  | 10    | 1081.372                                      | 1064.346                      | 983.386                                  | 1063.362                                      |
| P  | 9     | 1010.335<br>1010.306 (39)                     | 993.309                       | 912.349                                  | 992.325<br>992.187 (1)                        |



|   |   |                         |         |                        |                        |
|---|---|-------------------------|---------|------------------------|------------------------|
| D | 8 | 913.282                 | 896.256 | 815.296                | 895.272                |
| D | 7 | 798.255<br>*798.109 (6) | 781.229 | 700.269<br>700.162 (2) | 780.245                |
| s | 6 | 683.228                 | 666.202 | 585.243                | 665.218                |
| G | 5 | 516.230                 | 499.204 | -                      | 498.220                |
| D | 4 | 459.209                 | 442.182 | -                      | 441.198                |
| E | 3 | 344.182<br>344.081 (1)  | 327.155 | -                      | 326.171<br>326.290 (1) |
| P | 2 | 215.139                 | 198.113 | -                      | 197.129                |
| V | 1 | 118.086                 | 101.060 | -                      | 100.076                |

### Ion distribution

| Threshold | Ion count | Matches | % matched |
|-----------|-----------|---------|-----------|
| 0         | 90        | 57      | 63        |
| 0.5       | 87        | 57      | 65        |
| 1         | 80        | 54      | 67        |
| 2         | 60        | 43      | 71        |
| 3         | 49        | 33      | 67        |
| 4         | 44        | 31      | 70        |
| 5         | 40        | 28      | 70        |
| 10        | 23        | 16      | 69        |

### Observed ions > 1%

| m/z     | Intensity            | % max | Assignment (delta)                                   |
|---------|----------------------|-------|------------------------------------------------------|
| 326.290 | 145.09 <sub>s</sub>  | 1.70  | y3o (0.11)                                           |
| 344.081 | 155.62 <sub>s</sub>  | 1.83  | y3 (-0.10)                                           |
| 370.135 | 129.69 <sub>s</sub>  | 1.52  | b4 (-0.07) : b8[2+] (-0.56)                          |
| 394.199 | 111.75 <sub>s</sub>  | 1.31  |                                                      |
| 435.188 | 129.98 <sub>s</sub>  | 1.53  |                                                      |
| 453.163 | 301.29 <sub>s</sub>  | 3.54  | b5o (-0.08)                                          |
| 471.218 | 1422.36 <sub>s</sub> | 16.75 | x8[2+] (0.07) : b5 (-0.03)                           |
| 472.309 | 160.39 <sub>s</sub>  | 1.88  |                                                      |
| 475.205 | 138.76 <sub>s</sub>  | 1.63  |                                                      |
| 486.276 | 116.17 <sub>s</sub>  | 1.36  |                                                      |
| 495.338 | 106.21 <sub>s</sub>  | 1.25  | b11*[2+] (0.57)                                      |
| 550.984 | 165.14 <sub>s</sub>  | 1.94  | b6* (-0.29)                                          |
| 569.258 | 183.31 <sub>s</sub>  | 2.15  | c12[2+] (-0.04)                                      |
| 594.056 | 158.71 <sub>s</sub>  | 1.86  | a7* (-0.26)                                          |
| 612.315 | 160.37 <sub>s</sub>  | 1.88  |                                                      |
| 639.247 | 1897.42 <sub>s</sub> | 22.35 | b7 (-0.09)                                           |
| 640.397 | 464.28 <sub>s</sub>  | 5.46  | y12[2+] (0.15)                                       |
| 667.196 | 164.24 <sub>s</sub>  | 1.93  | y13o[2+] (0.44) : y13*[2+] (-0.04) : z13[2+] (-0.04) |
| 698.215 | 280.78 <sub>s</sub>  | 3.30  |                                                      |

|          |          |       |                                    |
|----------|----------|-------|------------------------------------|
| 700.162  | 225.24,  | 2.65  | y7-98 (-0.10)                      |
| 722.219  | 515.09,  | 6.06  | b15*[2+] (0.42) : b8o (-0.16)      |
| 740.307  | 5153.71, | 60.71 | b8 (-0.08)                         |
| 741.455  | 1073.87, | 12.65 |                                    |
| 744.324  | 267.22,  | 3.14  |                                    |
| 794.431  | 865.56,  | 10.19 |                                    |
| 798.109  | 536.64,  | 6.32  | y17-98[2+] (0.26) : y7 (-0.14)     |
| 803.411  | 854.50,  | 10.06 | b17-98[2+] (0.05)                  |
| 834.497  | 805.65,  | 9.49  |                                    |
| 843.574  | 2281.21, | 26.87 | b17o[2+] (0.23) : b17*[2+] (-0.25) |
| 852.374  | 1348.73, | 15.88 | b18-98[2+] (0.49) : b17[2+] (0.02) |
| 890.364  | 2177.98, | 25.65 | b10o (-0.10)                       |
| 892.649  | 1369.45, | 16.13 | b18*[2+] (0.29)                    |
| 901.358  | 1546.07, | 18.21 | b18[2+] (0.48)                     |
| 902.008  | 1044.67, | 12.30 |                                    |
| 941.596  | 8488.11, | 100   | x8 (0.31)                          |
| 950.326  | 1134.76, | 13.36 |                                    |
| 992.187  | 165.67,  | 1.95  | y9o (-0.13)                        |
| 1005.058 | 110.12,  | 1.29  | b11 (-0.47)                        |
| 1010.306 | 3378.38, | 39.80 | y9 (-0.02)                         |
| 1011.328 | 1042.48, | 12.28 |                                    |
| 1067.559 | 161.25,  | 1.89  |                                    |
| 1080.222 | 1220.52, | 14.37 | y11-98 (-0.21)                     |
| 1102.671 | 225.58,  | 2.65  | b12o (0.11)                        |
| 1120.455 | 785.61,  | 9.25  | b12 (-0.10)                        |
| 1121.622 | 380.24,  | 4.47  |                                    |
| 1160.517 | 248.42,  | 2.92  | y11o (0.10)                        |
| 1178.399 | 4864.95, | 57.31 | y11 (-0.02)                        |
| 1179.502 | 1175.48, | 13.84 |                                    |
| 1217.030 | 162.02,  | 1.90  | b13o (-0.55)                       |
| 1217.635 | 234.70,  | 2.76  | b13o (0.05)                        |
| 1235.503 | 665.37,  | 7.83  | b13 (-0.08)                        |
| 1236.440 | 210.75,  | 2.48  |                                    |
| 1279.321 | 1987.98, | 23.42 | y12 (-0.15)                        |
| 1280.325 | 756.73,  | 8.91  |                                    |
| 1304.490 | 252.49,  | 2.97  | b14-98 (-0.11)                     |
| 1305.589 | 141.33,  | 1.66  |                                    |
| 1332.316 | 198.48,  | 2.33  | y13o (-0.18)                       |
| 1348.997 | 146.68,  | 1.72  | y14-98 (-0.58)                     |
| 1349.804 | 351.18,  | 4.13  | y14-98 (0.22)                      |
| 1380.631 | 114.18,  | 1.34  |                                    |
| 1429.369 | 666.44,  | 7.85  | y14o (-0.18)                       |
| 1430.421 | 274.00,  | 3.22  | y14* (-0.11) : z14 (-0.11)         |

|          |                      |       |                                          |
|----------|----------------------|-------|------------------------------------------|
| 1447.320 | 1897.55 <sub>,</sub> | 22.35 | y14 (-0.24)                              |
| 1448.609 | 841.83 <sub>,</sub>  | 9.91  |                                          |
| 1459.954 | 224.42 <sub>,</sub>  | 2.64  | b15 (0.34)                               |
| 1477.781 | 485.78 <sub>,</sub>  | 5.72  |                                          |
| 1548.435 | 238.31 <sub>,</sub>  | 2.80  | y15 (-0.17)                              |
| 1556.475 | 361.30 <sub>,</sub>  | 4.25  | b16o (-0.15)                             |
| 1557.677 | 213.11 <sub>,</sub>  | 2.51  | b16* (0.06)                              |
| 1574.307 | 448.67 <sub>,</sub>  | 5.28  | b16 (-0.33)                              |
| 1575.559 | 482.67 <sub>,</sub>  | 5.68  |                                          |
| 1588.009 | 279.64 <sub>,</sub>  | 3.29  |                                          |
| 1605.698 | 830.36 <sub>,</sub>  | 9.78  | b17-98 (0.00)                            |
| 1674.552 | 543.79 <sub>,</sub>  | 6.40  | y17o (-0.10)                             |
| 1675.488 | 538.00 <sub>,</sub>  | 6.33  | y17* (-0.14) : z17 (-0.14) : a17 (-0.19) |
| 1685.463 | 558.93 <sub>,</sub>  | 6.58  | b17o (-0.20)                             |
| 1686.540 | 454.91 <sub>,</sub>  | 5.35  | b17* (-0.11)                             |
| 1692.226 | 397.95 <sub>,</sub>  | 4.68  | y18-98 (0.49) : y17 (-0.43)              |
| 1703.672 | 2114.64 <sub>,</sub> | 24.91 | b17 (-0.00)                              |
| 1704.542 | 1079.88 <sub>,</sub> | 12.72 |                                          |

MS/MS spectra of  
phosphorylated  
peptides in human  
cav3.2 (HEK293T cells)

S29

# ProPhosSI MS/MS report

Mass: 631.282133 Charge: 2+

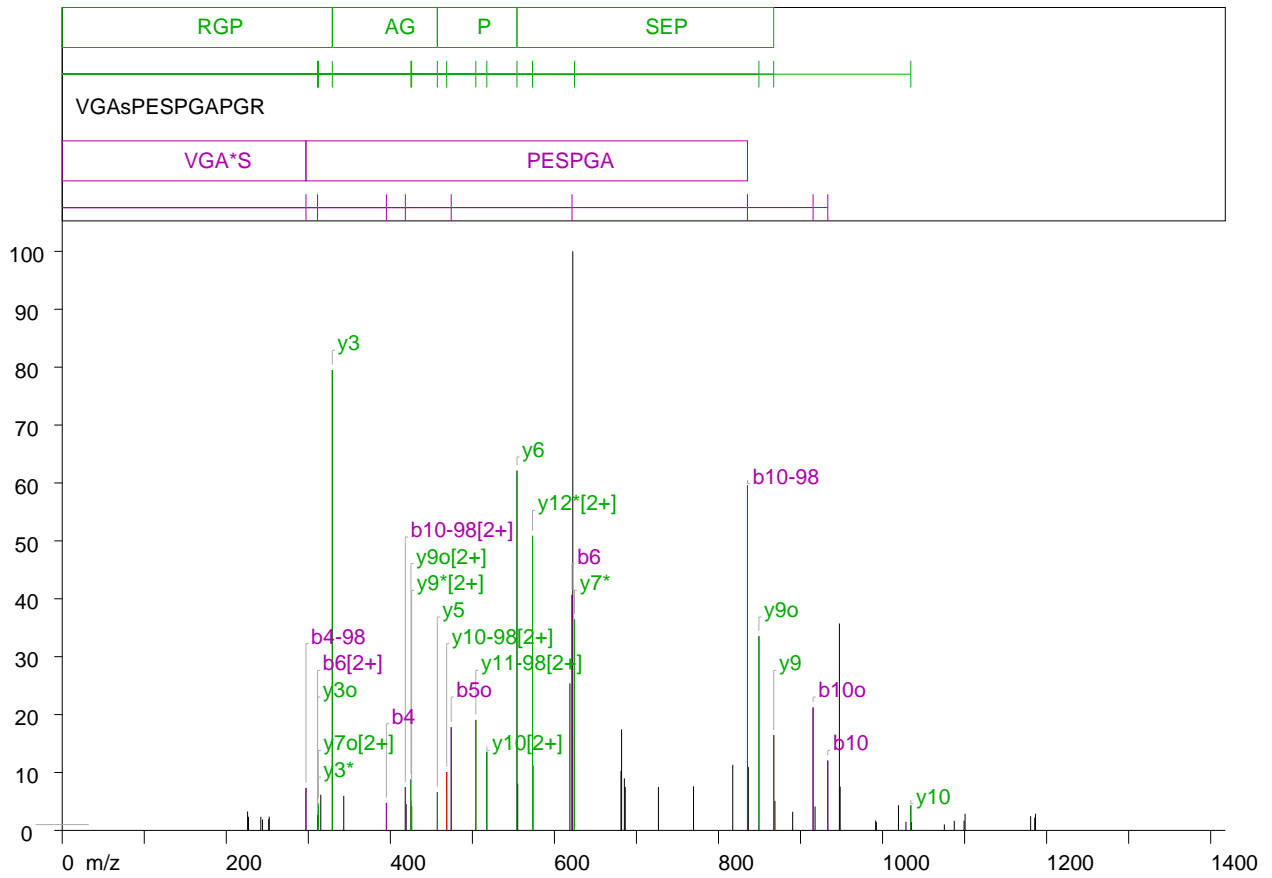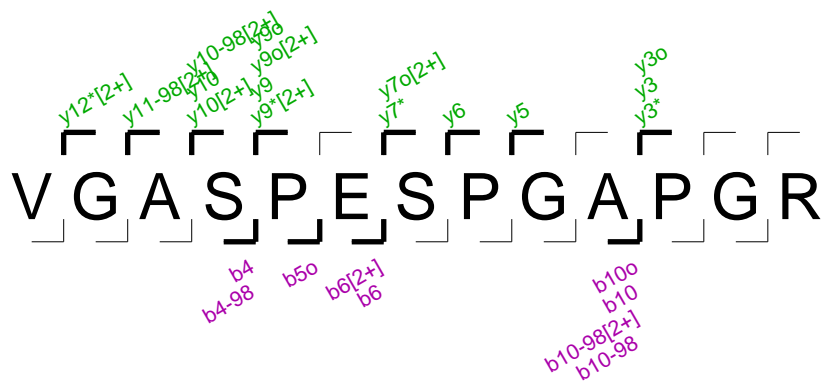

## Cav3.2 human

(22) 26 <sup>+</sup>VGAsPESPGAPGR 38 1260.550 (-0.0014) Da

|                         |     |
|-------------------------|-----|
| Parent Ion              | m/z |
| No parent ions observed |     |

## Modifications and supporting evidence

| Position | Residue ID | Modification | Evidence         |
|----------|------------|--------------|------------------|
| 4        | (29)       | Phospho (ST) | y9 => y10-98[2+] |

## Spectrum interpretation

| Rule                                   | passed/tests | Description                                                                                                                                                                                                                                                                                                                                                                                                                                                                                                                                                                                                                          |
|----------------------------------------|--------------|--------------------------------------------------------------------------------------------------------------------------------------------------------------------------------------------------------------------------------------------------------------------------------------------------------------------------------------------------------------------------------------------------------------------------------------------------------------------------------------------------------------------------------------------------------------------------------------------------------------------------------------|
| Parent ions present                    | 0/1          | Parent ions corresponding to the parent fragment - 1 phosphate ions were not found                                                                                                                                                                                                                                                                                                                                                                                                                                                                                                                                                   |
| Three -98 Ions present                 | 1/1          | 4 des-phospho fragment ions were found.                                                                                                                                                                                                                                                                                                                                                                                                                                                                                                                                                                                              |
| Unique -98 transitions present         | 1/1          | transition y9 to y10-98[2+] support unique phosphorylation at position 4<br><br/>                                                                                                                                                                                                                                                                                                                                                                                                                                                                                                                                                    |
| Four Sequential b or y ions            | 0/1          | Sequence of four y or b ions not observed                                                                                                                                                                                                                                                                                                                                                                                                                                                                                                                                                                                            |
| Five of six sequential ions present    | 0/1          |                                                                                                                                                                                                                                                                                                                                                                                                                                                                                                                                                                                                                                      |
| Proline directed fragmentation pattern | 5/5          | NOTE: S-P is a low abundance fragmentation.<br>PASS: y9> y8<br/><br>PASS: b5-98< b4-98<br/><br>NOTE: S-P is a low abundance fragmentation.<br>PASS: y6> y5 with ratio 9.36<br/><br>No proline ions at b8-98<br/><br>PASS: y3> y2<br/><br>PASS: b11-98< b10-98<br/>                                                                                                                                                                                                                                                                                                                                                                   |
| PhosphoTyrosine transition present     | 0/0          | 0 of 0 phosphotyrosine transitions were found.                                                                                                                                                                                                                                                                                                                                                                                                                                                                                                                                                                                       |
| Six of top ten ions identified         | 7/6          | ion 1 (mass: 622.397: intensity: 2165.16) assigned 0 times<br>ion 2 (mass: 329.249: intensity: 1721.40) assigned 1 times<br>ion 3 (mass: 554.335: intensity: 1345.02) assigned 1 times<br>ion 4 (mass: 835.306: intensity: 1289.71) assigned 1 times<br>ion 5 (mass: 573.245: intensity: 1101.40) assigned 2 times<br>ion 6 (mass: 621.435: intensity: 880.47) assigned 1 times<br>ion 7 (mass: 624.479: intensity: 788.74) assigned 2 times<br>ion 8 (mass: 947.373: intensity: 773.64) assigned 0 times<br>ion 9 (mass: 849.261: intensity: 726.19) assigned 1 times<br>ion 10 (mass: 618.890: intensity: 549.82) assigned 0 times |

## Ion Table

24 ions assigned of 52 ions above threshold (46%).

N-terminal ions

| AA | N-ion | b                                            | b*       | b-98                                        | bo                      |
|----|-------|----------------------------------------------|----------|---------------------------------------------|-------------------------|
| V  | 1     | 100.076                                      | 83.049   | -                                           | 82.065                  |
| G  | 2     | 157.097                                      | 140.071  | -                                           | 139.087                 |
| A  | 3     | 228.134                                      | 211.108  | -                                           | 210.124                 |
| s  | 4     | 395.133<br>395.162 (4)                       | 378.106  | 297.147<br>*297.123 (7)                     | 377.122                 |
| P  | 5     | 492.185                                      | 475.159  | 394.200                                     | 474.175<br>474.172 (17) |
| E  | 6     | 621.228<br>*311.243 [2+] (2)<br>621.435 (40) | 604.201  | 523.242                                     | 603.217                 |
| S  | 7     | 708.260                                      | 691.234  | 610.274                                     | 690.250                 |
| P  | 8     | 805.313                                      | 788.286  | 707.327                                     | 787.302                 |
| G  | 9     | 862.334                                      | 845.308  | 764.348                                     | 844.324                 |
| A  | 10    | 933.371<br>933.252 (12)                      | 916.345  | 835.386<br>418.253 [2+] (7)<br>835.306 (59) | 915.361<br>915.344 (21) |
| P  | 11    | 1030.424                                     | 1013.398 | 932.438                                     | 1012.414                |
| G  | 12    | 1087.446                                     | 1070.419 | 989.460                                     | 1069.435                |
| R  | 13    | -                                            | -        | -                                           | -                       |

C-terminal ions

| AA | C-ion | y                                             | y*                             | y-98                          | yo                                          |
|----|-------|-----------------------------------------------|--------------------------------|-------------------------------|---------------------------------------------|
| V  | 13    | -                                             | -                              | -                             | -                                           |
| G  | 12    | 1162.489                                      | 1145.462<br>*573.245 [2+] (50) | 1064.503                      | 1144.478                                    |
| A  | 11    | 1105.467                                      | 1088.441                       | 1007.482<br>504.172 [2+] (19) | 1087.457                                    |
| s  | 10    | 1034.430<br>517.598 [2+] (13)<br>1034.446 (4) | 1017.404                       | 936.444<br>468.612 [2+] (10)  | 1016.420                                    |
| P  | 9     | 867.432<br>867.328 (16)                       | 850.405<br>*425.921 [2+] (4)   | -                             | 849.421<br>425.088 [2+] (8)<br>849.261 (33) |
| E  | 8     | 770.379                                       | 753.353                        | -                             | 752.369                                     |
| S  | 7     | 641.337                                       | 624.310<br>*624.479 (36)       | -                             | 623.326<br>*312.112 [2+] (4)                |
| P  | 6     | 554.305<br>554.335 (62)                       | 537.278                        | -                             | 536.294                                     |
| G  | 5     | 457.252<br>457.249 (6)                        | 440.225                        | -                             | 439.241                                     |
| A  | 4     | 400.230                                       | 383.204                        | -                             | 382.220                                     |
| P  | 3     | 329.193<br>329.249 (79)                       | 312.167<br>*312.112 (4)        | -                             | 311.183<br>*311.243 (2)                     |
| G  | 2     | 232.140                                       | 215.114                        | -                             | 214.130                                     |
| R  | 1     | 175.119                                       | 158.092                        | -                             | 157.108                                     |

Ion distribution

| Threshold | Ion count | Matches | % matched |
|-----------|-----------|---------|-----------|
| 0         | 66        | 27      | 40        |



|     |    |    |    |
|-----|----|----|----|
| 0.5 | 65 | 27 | 41 |
| 1   | 61 | 25 | 40 |
| 2   | 52 | 24 | 46 |
| 3   | 44 | 23 | 52 |
| 4   | 42 | 23 | 54 |
| 5   | 35 | 19 | 54 |
| 10  | 22 | 15 | 68 |

### Observed ions > 1%

| m/z     | Intensity            | % max | Assignment (delta)                         |
|---------|----------------------|-------|--------------------------------------------|
| 225.961 | 70.70 <sub>,</sub>   | 3.26  |                                            |
| 227.095 | 50.91 <sub>,</sub>   | 2.35  |                                            |
| 242.116 | 51.18 <sub>,</sub>   | 2.36  |                                            |
| 244.221 | 40.62 <sub>,</sub>   | 1.87  |                                            |
| 251.692 | 42.48 <sub>,</sub>   | 1.96  |                                            |
| 252.379 | 51.28 <sub>,</sub>   | 2.36  |                                            |
| 297.123 | 158.97 <sub>,</sub>  | 7.34  | a6[2+] (0.00) : b4-98 (-0.02)              |
| 311.243 | 56.34 <sub>,</sub>   | 2.60  | b6[2+] (0.12) : y3o (0.05)                 |
| 312.112 | 99.50 <sub>,</sub>   | 4.59  | y3* (-0.05) : z3 (-0.05) : y7o[2+] (-0.05) |
| 315.177 | 133.28 <sub>,</sub>  | 6.15  |                                            |
| 329.249 | 1721.40 <sub>,</sub> | 79.50 | y3 (0.05)                                  |
| 343.182 | 128.98 <sub>,</sub>  | 5.95  |                                            |
| 395.162 | 102.88 <sub>,</sub>  | 4.75  | b4 (0.02)                                  |
| 418.253 | 161.73 <sub>,</sub>  | 7.46  | b10-98[2+] (0.05)                          |
| 419.246 | 98.65 <sub>,</sub>   | 4.55  |                                            |
| 425.088 | 190.69 <sub>,</sub>  | 8.80  | y9o[2+] (-0.12)                            |
| 425.921 | 90.92 <sub>,</sub>   | 4.19  | z9[2+] (0.21) : y9*[2+] (0.21)             |
| 457.249 | 143.67 <sub>,</sub>  | 6.63  | y5 (-0.00)                                 |
| 468.612 | 218.22 <sub>,</sub>  | 10.07 | y10-98[2+] (-0.11)                         |
| 474.172 | 385.92 <sub>,</sub>  | 17.82 | b5o (-0.00)                                |
| 504.172 | 413.03 <sub>,</sub>  | 19.07 | y11-98[2+] (-0.07)                         |
| 517.598 | 294.25 <sub>,</sub>  | 13.59 | y10[2+] (-0.12)                            |
| 554.335 | 1345.02 <sub>,</sub> | 62.12 | y6 (0.02)                                  |
| 555.256 | 174.53 <sub>,</sub>  | 8.06  |                                            |
| 573.245 | 1101.40 <sub>,</sub> | 50.86 | y12*[2+] (0.00) : z12[2+] (0.00)           |
| 573.883 | 243.53 <sub>,</sub>  | 11.24 |                                            |
| 618.890 | 549.82 <sub>,</sub>  | 25.39 |                                            |
| 621.435 | 880.47 <sub>,</sub>  | 40.66 | b6 (0.20)                                  |
| 622.397 | 2165.16 <sub>,</sub> | 100   |                                            |
| 624.479 | 788.74 <sub>,</sub>  | 36.42 | z7 (0.16) : y7* (0.16)                     |

|          |          |       |                           |
|----------|----------|-------|---------------------------|
| 681.144  | 222.40,  | 10.27 |                           |
| 681.875  | 377.99,  | 17.45 |                           |
| 685.260  | 194.63,  | 8.98  |                           |
| 686.296  | 162.15,  | 7.48  |                           |
| 726.791  | 162.53,  | 7.50  |                           |
| 769.566  | 164.65,  | 7.60  |                           |
| 817.386  | 245.32,  | 11.33 | a9* (0.07)                |
| 835.306  | 1289.71, | 59.56 | b10-98 (-0.08)            |
| 836.359  | 236.85,  | 10.93 |                           |
| 849.261  | 726.19,  | 33.53 | y9o (-0.16)               |
| 867.328  | 355.90,  | 16.43 | y9 (-0.10)                |
| 868.825  | 110.51,  | 5.10  |                           |
| 890.419  | 69.56,   | 3.21  |                           |
| 915.344  | 459.57,  | 21.22 | b10o (-0.01)              |
| 917.746  | 89.61,   | 4.13  |                           |
| 933.252  | 261.19,  | 12.06 | b10 (-0.11)               |
| 947.373  | 773.64,  | 35.73 |                           |
| 948.322  | 163.70,  | 7.56  |                           |
| 991.590  | 37.15,   | 1.71  |                           |
| 992.430  | 30.71,   | 1.41  |                           |
| 1019.400 | 94.20,   | 4.35  |                           |
| 1028.526 | 31.94,   | 1.47  |                           |
| 1034.446 | 93.71,   | 4.32  | y10 (0.01)                |
| 1035.218 | 30.56,   | 1.41  |                           |
| 1075.320 | 22.43,   | 1.03  |                           |
| 1087.452 | 35.85,   | 1.65  | b12 (0.00) : y11o (-0.00) |
| 1099.322 | 35.80,   | 1.65  |                           |
| 1100.596 | 62.59,   | 2.89  |                           |
| 1180.522 | 53.20,   | 2.45  |                           |
| 1185.486 | 47.59,   | 2.19  |                           |
| 1186.462 | 62.40,   | 2.88  |                           |

S32

# ProPhosSI MS/MS report

Mass: 631.282572 Charge: 2+

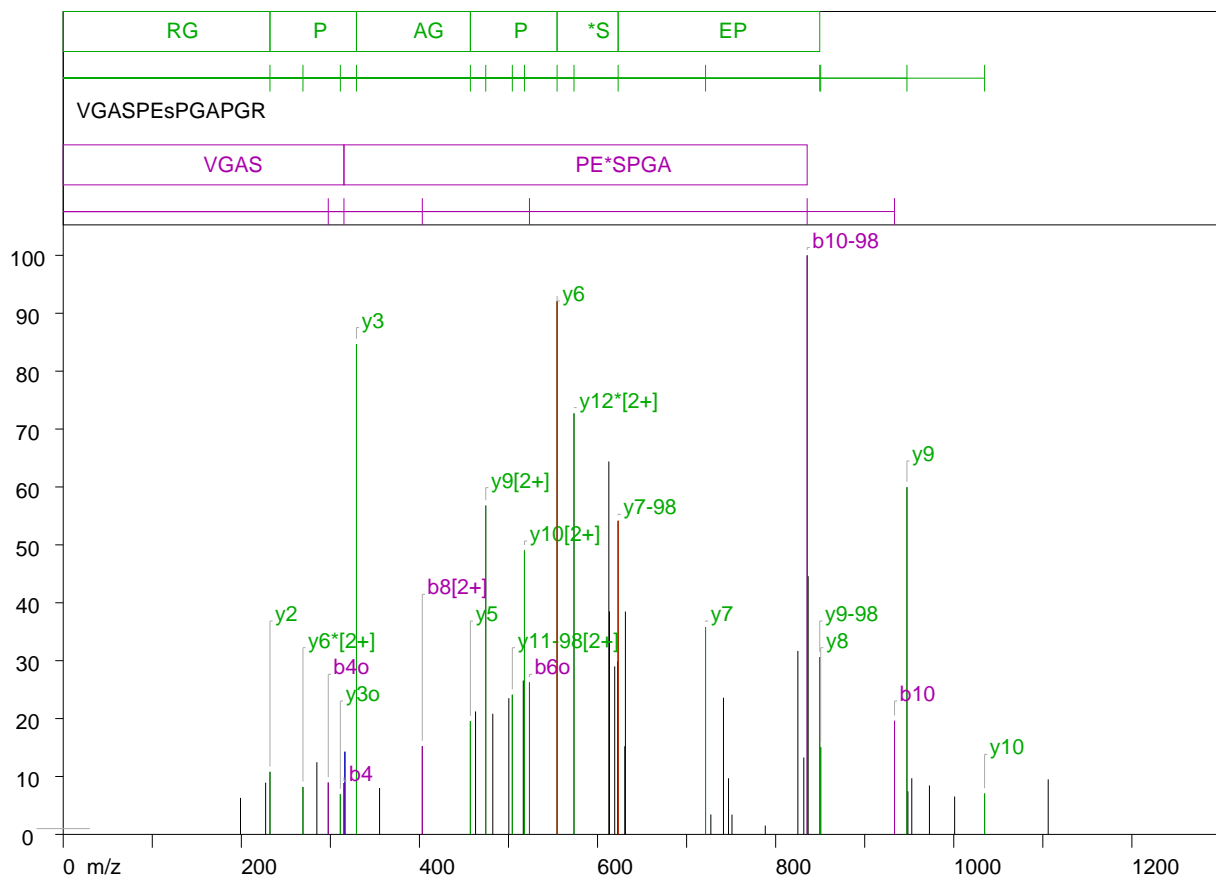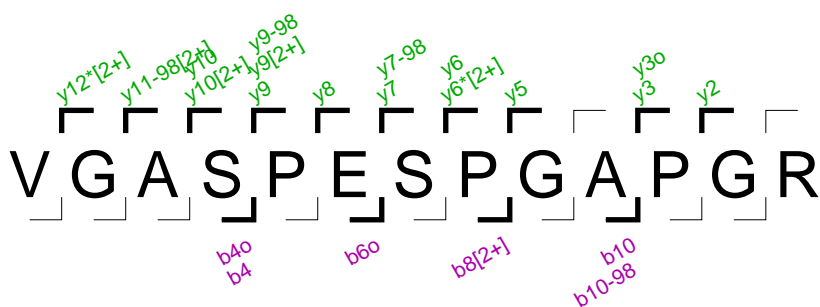

## Cav3.2 human

(46) 26 VGASPEsPGAPGR 38 1260.550 (-0.0005) Da

### Modifications and supporting evidence

| Position | Residue ID | Modification | Evidence    |
|----------|------------|--------------|-------------|
| 7        | (32)       | Phospho (ST) | y6 => y7-98 |

### Spectrum interpretation

| Rule                                   | passed/tests | Description                                                                                                                                                                                                                                                                                                                                                                                                                                                                                                                                                                                                              |
|----------------------------------------|--------------|--------------------------------------------------------------------------------------------------------------------------------------------------------------------------------------------------------------------------------------------------------------------------------------------------------------------------------------------------------------------------------------------------------------------------------------------------------------------------------------------------------------------------------------------------------------------------------------------------------------------------|
| Parent ions present                    | 0/1          | Parent ions corresponding to the parent fragment - 1 phosphate ions were not found                                                                                                                                                                                                                                                                                                                                                                                                                                                                                                                                       |
| Three -98 Ions present                 | 1/1          | 4 des-phospho fragment ions were found.                                                                                                                                                                                                                                                                                                                                                                                                                                                                                                                                                                                  |
| Unique -98 transitions present         | 1/1          | transition b4 to b10-98, transition y6 to y7-98 support unique phosphorylation at position 7<br><br/>                                                                                                                                                                                                                                                                                                                                                                                                                                                                                                                    |
| Four Sequential b or y ions            | 0/1          | Sequence of four y or b ions not observed                                                                                                                                                                                                                                                                                                                                                                                                                                                                                                                                                                                |
| Five of six sequential ions present    | 1/1          | Five of Six ions found between y2 and y7                                                                                                                                                                                                                                                                                                                                                                                                                                                                                                                                                                                 |
| Proline directed fragmentation pattern | 5/5          | NOTE: S-P is a low abundance fragmentation.<br>PASS: y9-98> y8-98<br/><br>PASS: b5< b4<br/><br>NOTE: S-P is a low abundance fragmentation.<br>PASS: y6> y5 with ratio 4.70<br/><br>No proline ions at b8-98<br/><br>PASS: y3> y2 with ratio 7.82<br/><br>PASS: b11-98< b10-98<br/>                                                                                                                                                                                                                                                                                                                                       |
| PhosphoTyrosine transition present     | 0/0          | 0 of 0 phosphotyrosine transitions were found.                                                                                                                                                                                                                                                                                                                                                                                                                                                                                                                                                                           |
| Six of top ten ions identified         | 8/6          | ion 1 (mass: 835.376: intensity: 132.04) assigned 1 times<br>ion 2 (mass: 554.567: intensity: 121.57) assigned 1 times<br>ion 3 (mass: 329.282: intensity: 111.80) assigned 1 times<br>ion 4 (mass: 573.565: intensity: 96.01) assigned 2 times<br>ion 5 (mass: 612.661: intensity: 85.04) assigned 0 times<br>ion 6 (mass: 947.406: intensity: 79.18) assigned 1 times<br>ion 7 (mass: 474.453: intensity: 74.98) assigned 1 times<br>ion 8 (mass: 623.134: intensity: 71.51) assigned 1 times<br>ion 9 (mass: 517.896: intensity: 64.77) assigned 1 times<br>ion 10 (mass: 836.473: intensity: 58.89) assigned 0 times |

## Ion Table

23 ions assigned of 49 ions above threshold (46%).

### N-terminal ions

| AA | N-ion | b                            | b*       | b-98                     | bo                      |
|----|-------|------------------------------|----------|--------------------------|-------------------------|
| V  | 1     | 100.076                      | 83.049   | -                        | 82.065                  |
| G  | 2     | 157.097                      | 140.071  | -                        | 139.087                 |
| A  | 3     | 228.134                      | 211.108  | -                        | 210.124                 |
| S  | 4     | 315.166<br>315.225 (8)       | 298.140  | -                        | 297.156<br>297.625 (8)  |
| P  | 5     | 412.219                      | 395.193  | -                        | 394.209                 |
| E  | 6     | 541.262                      | 524.235  | -                        | 523.251<br>523.535 (26) |
| s  | 7     | 708.260                      | 691.234  | 610.274                  | 690.250                 |
| P  | 8     | 805.313<br>403.224 [2+] (15) | 788.286  | 707.327                  | 787.302                 |
| G  | 9     | 862.334                      | 845.308  | 764.348                  | 844.324                 |
| A  | 10    | 933.371<br>933.487 (19)      | 916.345  | 835.386<br>835.376 (100) | 915.361                 |
| P  | 11    | 1030.424                     | 1013.398 | 932.438                  | 1012.414                |
| G  | 12    | 1087.446                     | 1070.419 | 989.460                  | 1069.435                |
| R  | 13    | -                            | -        | -                        | -                       |

### C-terminal ions

| AA | C-ion | y                                             | y*                             | y-98                          | yo                     |
|----|-------|-----------------------------------------------|--------------------------------|-------------------------------|------------------------|
| V  | 13    | -                                             | -                              | -                             | -                      |
| G  | 12    | 1162.489                                      | 1145.462<br>*573.565 [2+] (72) | 1064.503                      | 1144.478               |
| A  | 11    | 1105.467                                      | 1088.441                       | 1007.482<br>504.297 [2+] (24) | 1087.457               |
| S  | 10    | 1034.430<br>517.896 [2+] (49)<br>1034.608 (7) | 1017.404                       | 936.444                       | 1016.420               |
| P  | 9     | 947.398<br>947.406 (59)<br>474.453 [2+] (56)  | 930.372                        | 849.412<br>849.483 (30)       | 929.388                |
| E  | 8     | 850.346<br>850.575 (15)                       | 833.319                        | 752.360                       | 832.335                |
| s  | 7     | 721.303<br>721.262 (35)                       | 704.276                        | 623.317<br>623.134 (54)       | 703.292                |
| P  | 6     | 554.305<br>554.567 (92)                       | 537.278<br>*269.190 [2+] (8)   | -                             | 536.294                |
| G  | 5     | 457.252<br>457.188 (19)                       | 440.225                        | -                             | 439.241                |
| A  | 4     | 400.230                                       | 383.204                        | -                             | 382.220                |
| P  | 3     | 329.193<br>329.282 (84)                       | 312.167                        | -                             | 311.183<br>311.175 (6) |
| G  | 2     | 232.140<br>232.161 (10)                       | 215.114                        | -                             | 214.130                |
| R  | 1     | 175.119                                       | 158.092                        | -                             | 157.108                |

### Ion distribution

| Threshold | Ion count | Matches | % matched |
|-----------|-----------|---------|-----------|
| 0         | 50        | 23      | 46        |

|     |    |    |    |
|-----|----|----|----|
| 0.5 | 50 | 23 | 46 |
| 1   | 50 | 23 | 46 |
| 2   | 49 | 22 | 44 |
| 3   | 49 | 22 | 44 |
| 4   | 47 | 22 | 46 |
| 5   | 47 | 22 | 46 |
| 10  | 33 | 17 | 51 |

### Observed ions > 1%

| m/z     | Intensity           | % max | Assignment (delta)                          |
|---------|---------------------|-------|---------------------------------------------|
| 199.068 | 8.32 <sub>3</sub>   | 6.30  |                                             |
| 227.294 | 11.80 <sub>3</sub>  | 8.93  |                                             |
| 232.161 | 14.28 <sub>3</sub>  | 10.81 | y2 (0.02)                                   |
| 269.190 | 10.82 <sub>3</sub>  | 8.19  | y6*[2+] (0.04) : z6[2+] (0.04) : a4o (0.02) |
| 284.804 | 16.46 <sub>3</sub>  | 12.46 |                                             |
| 297.625 | 11.83 <sub>3</sub>  | 8.95  | b4o (0.46)                                  |
| 311.175 | 9.19 <sub>3</sub>   | 6.96  | y3o (-0.00)                                 |
| 315.225 | 11.72 <sub>3</sub>  | 8.87  | b4 (0.05)                                   |
| 316.293 | 18.86 <sub>3</sub>  | 14.28 |                                             |
| 329.282 | 111.80 <sub>3</sub> | 84.67 | y3 (0.08)                                   |
| 355.218 | 10.57 <sub>3</sub>  | 8.00  |                                             |
| 403.224 | 20.13 <sub>3</sub>  | 15.24 | b8[2+] (0.06)                               |
| 457.188 | 25.82 <sub>3</sub>  | 19.55 | y5 (-0.06)                                  |
| 463.006 | 28.04 <sub>3</sub>  | 21.23 |                                             |
| 474.453 | 74.98 <sub>3</sub>  | 56.78 | y9[2+] (0.24)                               |
| 482.362 | 27.51 <sub>3</sub>  | 20.83 |                                             |
| 500.371 | 31.06 <sub>3</sub>  | 23.52 |                                             |
| 504.297 | 31.85 <sub>3</sub>  | 24.12 | y11-98[2+] (0.05)                           |
| 516.586 | 35.10 <sub>3</sub>  | 26.58 |                                             |
| 517.896 | 64.77 <sub>3</sub>  | 49.05 | y10[2+] (0.17)                              |
| 523.535 | 34.64 <sub>3</sub>  | 26.23 | b6o (0.28)                                  |
| 554.567 | 121.57 <sub>3</sub> | 92.07 | y6 (0.26)                                   |
| 573.565 | 96.01 <sub>3</sub>  | 72.71 | y12*[2+] (0.32) : z12[2+] (0.32)            |
| 612.661 | 85.04 <sub>3</sub>  | 64.40 |                                             |
| 613.374 | 50.84 <sub>3</sub>  | 38.50 |                                             |
| 619.271 | 38.31 <sub>3</sub>  | 29.01 |                                             |
| 622.415 | 39.49 <sub>3</sub>  | 29.90 |                                             |
| 623.134 | 71.51 <sub>3</sub>  | 54.15 | y7-98 (-0.18)                               |
| 630.569 | 20.10 <sub>3</sub>  | 15.22 |                                             |
| 631.280 | 50.81 <sub>3</sub>  | 38.48 |                                             |
| 721.262 | 47.26 <sub>3</sub>  | 35.79 | y7 (-0.04)                                  |

|          |                     |       |                |
|----------|---------------------|-------|----------------|
| 727.230  | 4.55 <sub>,</sub>   | 3.44  |                |
| 741.391  | 31.16 <sub>,</sub>  | 23.59 |                |
| 747.074  | 12.80 <sub>,</sub>  | 9.69  |                |
| 750.950  | 4.51 <sub>,</sub>   | 3.41  |                |
| 788.345  | 2.02 <sub>,</sub>   | 1.52  | b8* (0.05)     |
| 824.933  | 41.84 <sub>,</sub>  | 31.68 |                |
| 831.593  | 17.53 <sub>,</sub>  | 13.27 |                |
| 835.376  | 132.04 <sub>,</sub> | 100   | b10-98 (-0.01) |
| 836.473  | 58.89 <sub>,</sub>  | 44.60 |                |
| 849.483  | 40.43 <sub>,</sub>  | 30.61 | y9-98 (0.07)   |
| 850.575  | 19.89 <sub>,</sub>  | 15.06 | y8 (0.22)      |
| 933.487  | 25.91 <sub>,</sub>  | 19.62 | b10 (0.11)     |
| 947.406  | 79.18 <sub>,</sub>  | 59.96 | y9 (0.00)      |
| 948.482  | 9.82 <sub>,</sub>   | 7.43  |                |
| 952.851  | 12.80 <sub>,</sub>  | 9.69  |                |
| 972.665  | 11.15 <sub>,</sub>  | 8.44  |                |
| 1000.975 | 8.64 <sub>,</sub>   | 6.54  |                |
| 1034.608 | 9.31 <sub>,</sub>   | 7.05  | y10 (0.17)     |
| 1106.039 | 12.55               | 9.50  |                |



S49

# ProPhosSI MS/MS report

Mass: 826.862086 Charge: 2+

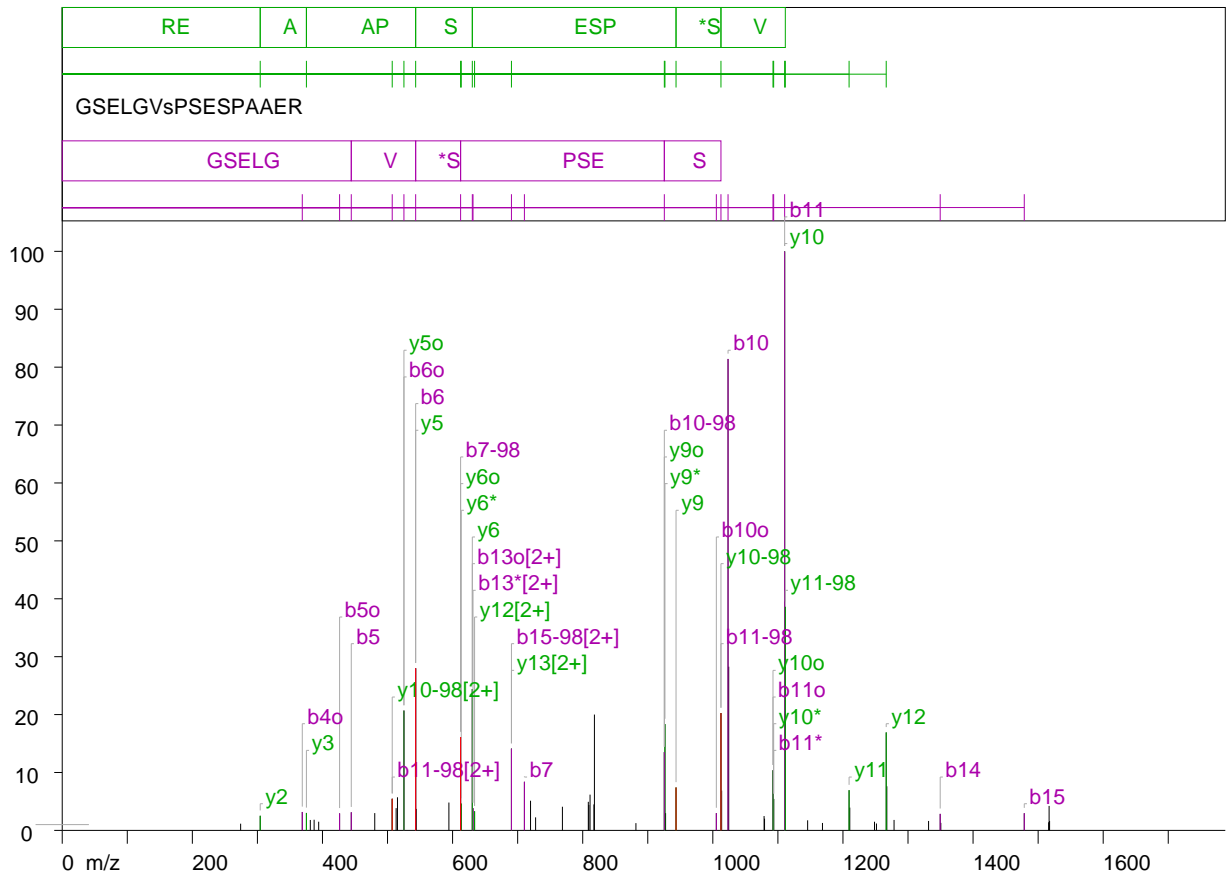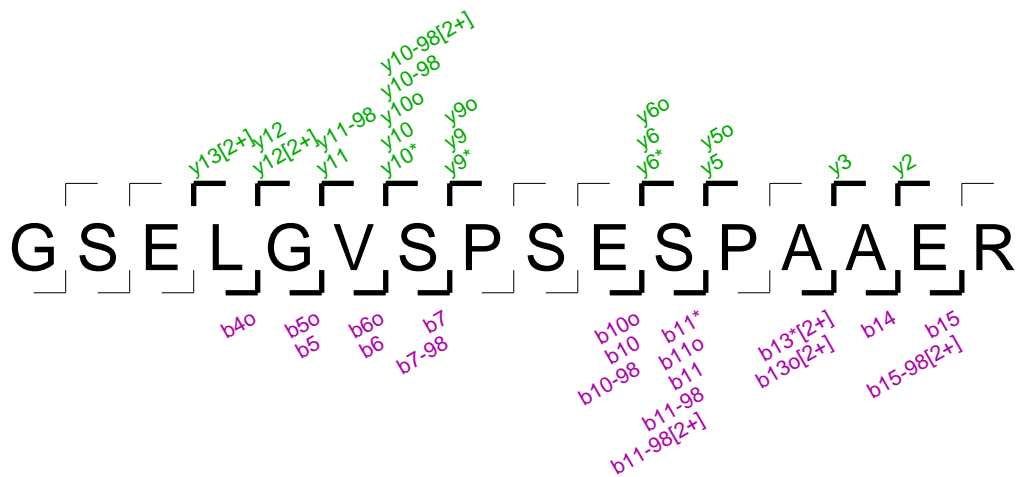

# GSELVSPSESPAER

(62) 43 GSELVSPSESPAER 58 1651.709 (-0.0005) Da

|                         |     |
|-------------------------|-----|
| Parent Ion              | m/z |
| No parent ions observed |     |

## Modifications and supporting evidence

| Position | Residue ID | Modification | Evidence     |
|----------|------------|--------------|--------------|
| 7        | (49)       | Phospho (ST) | y9 => y10-98 |

## Spectrum interpretation

| Rule                                   | passed/tests | Description                                                                                                                                                                                                                                                                                                                                                                                                                                                                                                                                                                                                                                                                  |
|----------------------------------------|--------------|------------------------------------------------------------------------------------------------------------------------------------------------------------------------------------------------------------------------------------------------------------------------------------------------------------------------------------------------------------------------------------------------------------------------------------------------------------------------------------------------------------------------------------------------------------------------------------------------------------------------------------------------------------------------------|
| Parent ions present                    | 0/1          | Parent ions corresponding to the parent fragment - 1 phosphate ions were not found                                                                                                                                                                                                                                                                                                                                                                                                                                                                                                                                                                                           |
| Three -98 Ions present                 | 1/1          | 6 des-phospho fragment ions were found.                                                                                                                                                                                                                                                                                                                                                                                                                                                                                                                                                                                                                                      |
| Unique -98 transitions present         | 1/1          | transition y9 to y10-98 support unique phosphorylation at position 7 <br/>                                                                                                                                                                                                                                                                                                                                                                                                                                                                                                                                                                                                   |
| Four Sequential b or y ions            | 0/1          | Sequence of four y or b ions not observed                                                                                                                                                                                                                                                                                                                                                                                                                                                                                                                                                                                                                                    |
| Five of six sequential ions present    | 0/1          |                                                                                                                                                                                                                                                                                                                                                                                                                                                                                                                                                                                                                                                                              |
| Proline directed fragmentation pattern | 4/4          | NOTE: S-P is a low abundance fragmentation.<br>PASS: y9> y8<br/><br>PASS: b8-98< b7-98<br/><br>NOTE: S-P is a low abundance fragmentation.<br>PASS: y5> y4<br/><br>PASS: b12-98< b11-98<br/>                                                                                                                                                                                                                                                                                                                                                                                                                                                                                 |
| PhosphoTyrosine transition present     | 0/0          | 0 of 0 phosphotyrosine transitions were found.                                                                                                                                                                                                                                                                                                                                                                                                                                                                                                                                                                                                                               |
| Six of top ten ions identified         | 8/6          | ion 1 (mass: 1110.391: intensity: 9917.15)<br>assigned 2 times<br>ion 2 (mass: 1023.397: intensity: 8074.30)<br>assigned 1 times<br>ion 3 (mass: 1111.410: intensity: 3828.31)<br>assigned 1 times<br>ion 4 (mass: 1024.427: intensity: 2803.53)<br>assigned 0 times<br>ion 5 (mass: 543.253: intensity: 2777.18)<br>assigned 2 times<br>ion 6 (mass: 630.304: intensity: 2420.94)<br>assigned 2 times<br>ion 7 (mass: 525.196: intensity: 2051.77)<br>assigned 2 times<br>ion 8 (mass: 1012.479: intensity: 2009.85)<br>assigned 2 times<br>ion 9 (mass: 817.985: intensity: 1983.84)<br>assigned 0 times<br>ion 10 (mass: 926.387: intensity: 1820.69)<br>assigned 2 times |

## Ion Table

32 ions assigned of 50 ions above threshold (64%).

### N-terminal ions

| AA | N-ion | b       | b*      | b-98 | bo                     |
|----|-------|---------|---------|------|------------------------|
| G  | 1     | 58.029  | 41.002  | -    | 40.018                 |
| S  | 2     | 145.061 | 128.034 | -    | 127.050                |
| E  | 3     | 274.103 | 257.077 | -    | 256.093                |
| L  | 4     | 387.187 | 370.161 | -    | 369.177<br>368.963 (3) |

|   |    |                             |                              |                                                 |                                |
|---|----|-----------------------------|------------------------------|-------------------------------------------------|--------------------------------|
| G | 5  | 444.209<br>444.258 (3)      | 427.182                      | -                                               | 426.198<br>426.307 (2)         |
| V | 6  | 543.277<br>*543.253 (28)    | 526.251                      | -                                               | 525.267<br>*525.196 (20)       |
| s | 7  | 710.276<br>710.399 (8)      | 693.249                      | 612.290<br>*612.324 (16)                        | 692.265                        |
| P | 8  | 807.328                     | 790.302                      | 709.343                                         | 789.318                        |
| S | 9  | 894.361                     | 877.334                      | 796.375                                         | 876.350                        |
| E | 10 | 1023.403<br>1023.397 (81)   | 1006.377                     | 925.417<br>*925.455 (13)                        | 1005.393<br>1005.387 (2)       |
| S | 11 | 1110.435<br>*1110.391 (100) | 1093.409<br>*1093.486 (5)    | 1012.449<br>*1012.479 (20)<br>*507.225 [2+] (5) | 1092.425<br>*1092.467 (10)     |
| P | 12 | 1207.488                    | 1190.461                     | 1109.502                                        | 1189.477                       |
| A | 13 | 1278.525                    | 1261.498<br>631.381 [2+] (3) | 1180.539                                        | 1260.514<br>*630.304 [2+] (24) |
| A | 14 | 1349.562<br>1349.464 (2)    | 1332.536                     | 1251.576                                        | 1331.552                       |
| E | 15 | 1478.605<br>1478.679 (2)    | 1461.578                     | 1380.619<br>*690.465 [2+] (14)                  | 1460.594                       |
| R | 16 | -                           | -                            | -                                               | -                              |

### C-terminal ions

| AA | C-ion | y                                             | y*                        | y-98                                            | yo                         |
|----|-------|-----------------------------------------------|---------------------------|-------------------------------------------------|----------------------------|
| G  | 16    | -                                             | -                         | -                                               | -                          |
| S  | 15    | 1595.695                                      | 1578.668                  | 1497.709                                        | 1577.684                   |
| E  | 14    | 1508.663                                      | 1491.636                  | 1410.677                                        | 1490.652                   |
| L  | 13    | 1379.620<br>*690.465 [2+] (14)                | 1362.594                  | 1281.634                                        | 1361.610                   |
| G  | 12    | 1266.536<br>633.810 [2+] (3)<br>1266.490 (16) | 1249.510                  | 1168.550                                        | 1248.526                   |
| V  | 11    | 1209.515<br>1209.448 (6)                      | 1192.488                  | 1111.529<br>1111.410 (38)                       | 1191.504                   |
| s  | 10    | 1110.446<br>*1110.391 (100)                   | 1093.420<br>*1093.486 (5) | 1012.460<br>*1012.479 (20)<br>*507.225 [2+] (5) | 1092.436<br>*1092.467 (10) |
| P  | 9     | 943.448<br>943.439 (7)                        | 926.422<br>*926.387 (18)  | -                                               | 925.437<br>*925.455 (13)   |
| S  | 8     | 846.395                                       | 829.369                   | -                                               | 828.385                    |
| E  | 7     | 759.363                                       | 742.337                   | -                                               | 741.353                    |
| S  | 6     | 630.321<br>*630.304 (24)                      | 613.294<br>*613.308 (4)   | -                                               | 612.310<br>*612.324 (16)   |
| P  | 5     | 543.289<br>*543.253 (28)                      | 526.262                   | -                                               | 525.278<br>*525.196 (20)   |
| A  | 4     | 446.236                                       | 429.209                   | -                                               | 428.225                    |
| A  | 3     | 375.199<br>375.320 (3)                        | 358.172                   | -                                               | 357.188                    |
| E  | 2     | 304.162<br>304.308 (2)                        | 287.135                   | -                                               | 286.151                    |
| R  | 1     | 175.119                                       | 158.092                   | -                                               | 157.108                    |

### Ion distribution

| Threshold | Ion count | Matches | % matched |
|-----------|-----------|---------|-----------|
|-----------|-----------|---------|-----------|

|     |    |    |    |
|-----|----|----|----|
| 0   | 80 | 45 | 56 |
| 0.5 | 77 | 44 | 57 |
| 1   | 64 | 41 | 64 |
| 2   | 50 | 32 | 64 |
| 3   | 40 | 26 | 65 |
| 4   | 32 | 21 | 65 |
| 5   | 25 | 19 | 76 |
| 10  | 15 | 13 | 86 |

### Observed ions > 1%

| m/z     | Intensity            | % max | Assignment (delta)                          |
|---------|----------------------|-------|---------------------------------------------|
| 274.222 | 114.99 <sub>2</sub>  | 1.15  | b3 (0.11)                                   |
| 304.308 | 250.62 <sub>2</sub>  | 2.52  | y2 (0.14)                                   |
| 368.963 | 315.51 <sub>2</sub>  | 3.18  | b4o (-0.21)                                 |
| 375.320 | 298.77 <sub>2</sub>  | 3.01  | y3 (0.12)                                   |
| 381.311 | 178.56 <sub>2</sub>  | 1.80  | a8o[2+] (0.14) : a8*[2+] (-0.34)            |
| 387.182 | 182.47 <sub>2</sub>  | 1.83  | b4 (-0.00)                                  |
| 394.193 | 148.79 <sub>2</sub>  | 1.50  | x7[2+] (0.00)                               |
| 426.307 | 291.38 <sub>2</sub>  | 2.93  | b5o (0.10)                                  |
| 444.258 | 310.31 <sub>2</sub>  | 3.12  | b5 (0.04)                                   |
| 480.337 | 296.34 <sub>2</sub>  | 2.98  |                                             |
| 507.225 | 541.56 <sub>2</sub>  | 5.46  | b11-98[2+] (0.49) : y10-98[2+] (0.49)       |
| 513.223 | 381.30 <sub>2</sub>  | 3.84  |                                             |
| 515.288 | 567.13 <sub>2</sub>  | 5.71  | a6 (0.00)                                   |
| 525.196 | 2051.77 <sub>2</sub> | 20.68 | b6o (-0.07) : y5o (-0.08)                   |
| 543.253 | 2777.18 <sub>2</sub> | 28.00 | b6 (-0.02) : y5 (-0.03)                     |
| 544.237 | 368.23 <sub>2</sub>  | 3.71  |                                             |
| 594.306 | 477.11 <sub>2</sub>  | 4.81  |                                             |
| 612.324 | 1599.36 <sub>2</sub> | 16.12 | b7-98 (0.03) : y6o (0.01) : c12[2+] (-0.43) |
| 613.308 | 458.57 <sub>2</sub>  | 4.62  | c12[2+] (0.54) : y6* (0.01) : z6 (0.01)     |
| 630.304 | 2420.94 <sub>2</sub> | 24.41 | y6 (-0.01) : b13o[2+] (-0.45)               |
| 631.381 | 381.05 <sub>2</sub>  | 3.84  | b13*[2+] (0.12)                             |
| 633.810 | 326.95 <sub>2</sub>  | 3.29  | y12[2+] (0.03)                              |
| 690.465 | 1400.12 <sub>2</sub> | 14.11 | y13[2+] (0.15) : b15-98[2+] (-0.34)         |
| 710.399 | 832.98 <sub>2</sub>  | 8.39  | b7 (0.12)                                   |
| 719.822 | 508.30 <sub>2</sub>  | 5.12  |                                             |
| 727.596 | 223.33 <sub>2</sub>  | 2.25  | c7 (0.29)                                   |
| 768.813 | 405.19 <sub>2</sub>  | 4.08  | x14[2+] (-0.02)                             |
| 808.624 | 489.41 <sub>2</sub>  | 4.93  |                                             |
| 809.440 | 435.11 <sub>2</sub>  | 4.38  |                                             |
| 811.256 | 612.58 <sub>2</sub>  | 6.17  |                                             |
| 817.223 | 445.11 <sub>2</sub>  | 4.48  |                                             |

|          |                      |       |                                        |
|----------|----------------------|-------|----------------------------------------|
| 817.985  | 1983.84 <sub>3</sub> | 20.00 |                                        |
| 881.797  | 124.57 <sub>3</sub>  | 1.25  |                                        |
| 925.455  | 1340.57 <sub>3</sub> | 13.51 | b10-98 (0.03) : y9o (0.01)             |
| 926.387  | 1820.69 <sub>3</sub> | 18.35 | z9 (-0.03) : y9* (-0.03)               |
| 927.395  | 295.77 <sub>3</sub>  | 2.98  |                                        |
| 943.439  | 734.95 <sub>3</sub>  | 7.41  | y9 (-0.00)                             |
| 1005.387 | 295.99 <sub>3</sub>  | 2.98  | b10o (-0.00)                           |
| 1012.479 | 2009.85 <sub>3</sub> | 20.26 | b11-98 (0.02) : y10-98 (0.01)          |
| 1013.568 | 681.76 <sub>3</sub>  | 6.87  |                                        |
| 1023.397 | 8074.30 <sub>3</sub> | 81.41 | b10 (-0.00)                            |
| 1024.427 | 2803.53 <sub>3</sub> | 28.26 |                                        |
| 1078.777 | 245.92 <sub>3</sub>  | 2.47  |                                        |
| 1079.488 | 201.12 <sub>3</sub>  | 2.02  |                                        |
| 1092.467 | 1029.66 <sub>3</sub> | 10.38 | b11o (0.04) : y10o (0.03)              |
| 1093.486 | 538.53 <sub>3</sub>  | 5.43  | b11* (0.07) : y10* (0.06) : z10 (0.06) |
| 1110.391 | 9917.15 <sub>3</sub> | 100   | b11 (-0.04) : y10 (-0.05)              |
| 1111.410 | 3828.31 <sub>3</sub> | 38.60 | y11-98 (-0.11)                         |
| 1145.703 | 172.71 <sub>3</sub>  | 1.74  |                                        |
| 1168.527 | 127.41 <sub>3</sub>  | 1.28  | y12-98 (-0.02)                         |
| 1209.448 | 688.75 <sub>3</sub>  | 6.94  | y11 (-0.06)                            |
| 1210.514 | 390.48 <sub>3</sub>  | 3.93  |                                        |
| 1248.514 | 148.39 <sub>3</sub>  | 1.49  | y12o (-0.01)                           |
| 1251.481 | 118.09 <sub>3</sub>  | 1.19  | b14-98 (-0.09)                         |
| 1266.490 | 1678.38 <sub>3</sub> | 16.92 | y12 (-0.04)                            |
| 1267.460 | 755.73 <sub>3</sub>  | 7.62  |                                        |
| 1278.547 | 179.36 <sub>3</sub>  | 1.80  | b13 (0.02)                             |
| 1331.582 | 161.68 <sub>3</sub>  | 1.63  | b14o (0.02)                            |
| 1349.464 | 283.02 <sub>3</sub>  | 2.85  | b14 (-0.09)                            |
| 1350.424 | 128.84 <sub>3</sub>  | 1.29  |                                        |
| 1478.679 | 294.20 <sub>3</sub>  | 2.96  | b15 (0.07)                             |
| 1516.155 | 138.97 <sub>3</sub>  | 1.40  |                                        |
| 1516.861 | 419.45 <sub>3</sub>  | 4.22  |                                        |
| 1517.620 | 162.02 <sub>3</sub>  | 1.63  |                                        |

S51 and  
S53 (diP)

# ProPhosSI MS/MS report

Mass: 866.843742 Charge: 2+

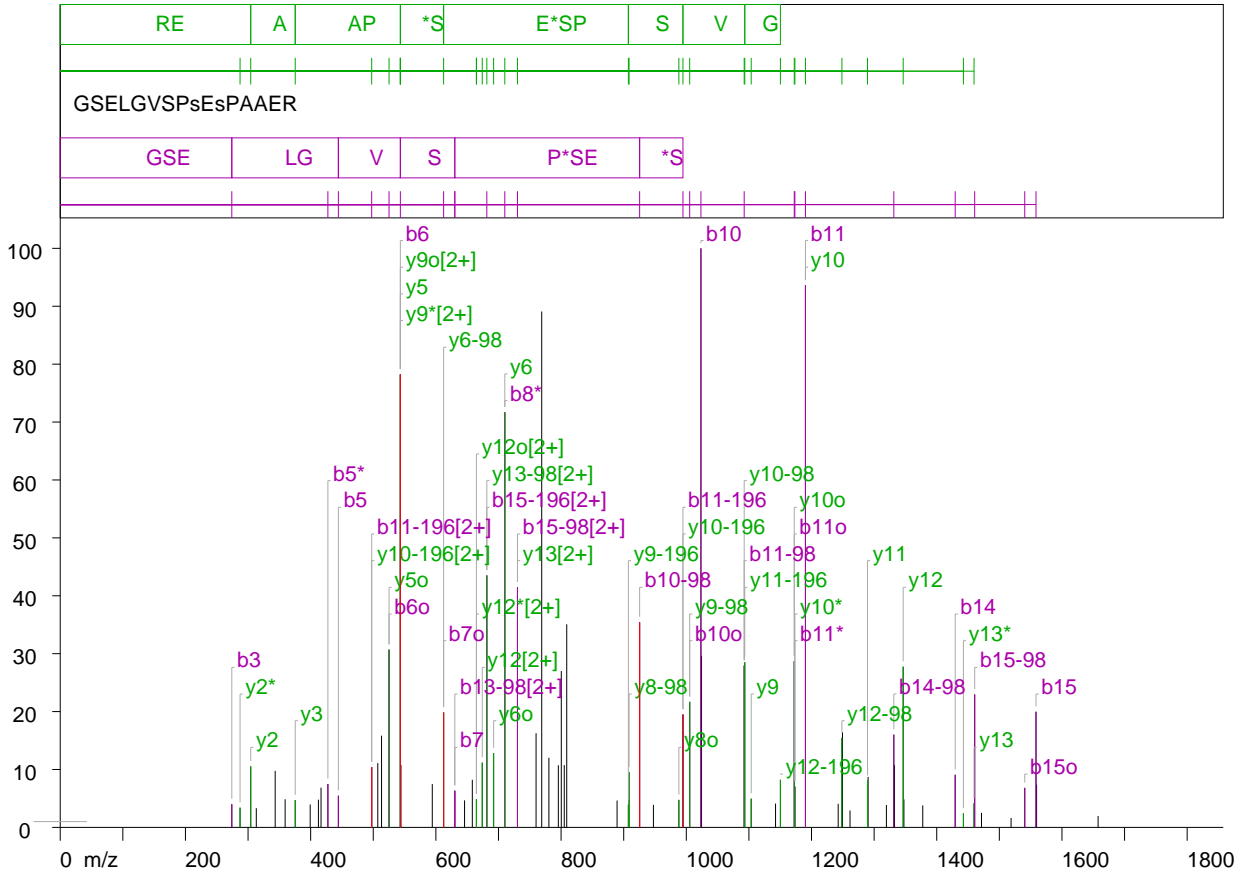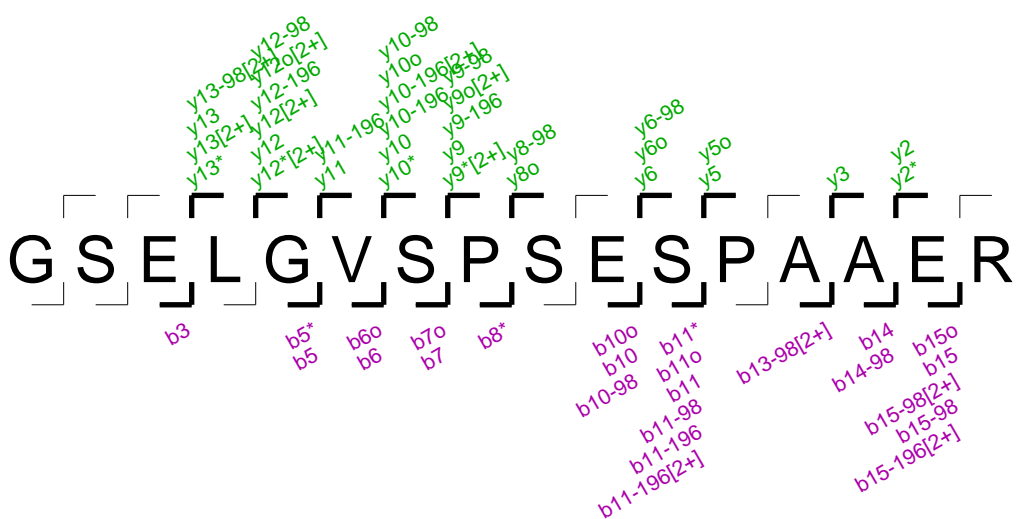



## Cav3.2 human

(43) 43 GSELGVSPsEsPAAER 58 1731.675 (-0.0035) Da

|                         |     |
|-------------------------|-----|
| Parent Ion              | m/z |
| No parent ions observed |     |

### Modifications and supporting evidence

| Position | Residue ID | Modification | Evidence             |
|----------|------------|--------------|----------------------|
| 9        | (51)       | Phospho (ST) | y8-98, y8°, y9-96,y9 |
| 11       | (53)       | Phospho (ST) |                      |

### Spectrum interpretation

| Rule                                   | passed/tests | Description                                                                                                                                                                                                                                                                                                                                                                                                                                                                                                                                                                                                                      |
|----------------------------------------|--------------|----------------------------------------------------------------------------------------------------------------------------------------------------------------------------------------------------------------------------------------------------------------------------------------------------------------------------------------------------------------------------------------------------------------------------------------------------------------------------------------------------------------------------------------------------------------------------------------------------------------------------------|
| Parent ions present                    | 0/1          | Parent ions corresponding to the parent fragment - 2 phosphate ions were not found                                                                                                                                                                                                                                                                                                                                                                                                                                                                                                                                               |
| Three -98 Ions present                 | 1/1          | 8 des-phospho fragment ions were found.                                                                                                                                                                                                                                                                                                                                                                                                                                                                                                                                                                                          |
| Unique -98 transitions present         | 2/2          |                                                                                                                                                                                                                                                                                                                                                                                                                                                                                                                                                                                                                                  |
| Four Sequential b or y ions            | 1/1          | Sequence of four y ions found from y9-196 to y12-196.                                                                                                                                                                                                                                                                                                                                                                                                                                                                                                                                                                            |
| Five of six sequential ions present    | 0/1          |                                                                                                                                                                                                                                                                                                                                                                                                                                                                                                                                                                                                                                  |
| Proline directed fragmentation pattern | 4/4          | NOTE: S-P is a low abundance fragmentation.<br>PASS: y9-196> y8-196<br/><br>PASS: b8< b7<br/><br>NOTE: S-P is a low abundance fragmentation.<br>PASS: y5> y4<br/><br>PASS: b12-196< b11-196<br/>                                                                                                                                                                                                                                                                                                                                                                                                                                 |
| PhosphoTyrosine transition present     | 0/0          | 0 of 0 phosphotyrosine transitions were found.                                                                                                                                                                                                                                                                                                                                                                                                                                                                                                                                                                                   |
| Six of top ten ions identified         | 9/6          | ion 1 (mass: 1023.355: intensity: 302.70) assigned 1 times<br>ion 2 (mass: 1190.319: intensity: 283.49) assigned 2 times<br>ion 3 (mass: 769.078: intensity: 269.69) assigned 0 times<br>ion 4 (mass: 543.255: intensity: 236.82) assigned 5 times<br>ion 5 (mass: 710.116: intensity: 217.03) assigned 2 times<br>ion 6 (mass: 681.402: intensity: 131.72) assigned 3 times<br>ion 7 (mass: 730.314: intensity: 125.54) assigned 2 times<br>ion 8 (mass: 925.444: intensity: 107.27) assigned 1 times<br>ion 9 (mass: 809.014: intensity: 106.17) assigned 1 times<br>ion 10 (mass: 525.202: intensity: 92.92) assigned 2 times |

## Ion Table

46 ions assigned of 74 ions above threshold (62%).

### N-terminal ions

| AA | N-ion | b                          | b*                        | b-196                                             | b-98                                               | bo                         |
|----|-------|----------------------------|---------------------------|---------------------------------------------------|----------------------------------------------------|----------------------------|
| G  | 1     | 58.029                     | 41.002                    | -                                                 | -                                                  | 40.018                     |
| S  | 2     | 145.061                    | 128.034                   | -                                                 | -                                                  | 127.050                    |
| E  | 3     | 274.103<br>274.050 (4)     | 257.077                   | -                                                 | -                                                  | 256.093                    |
| L  | 4     | 387.187                    | 370.161                   | -                                                 | -                                                  | 369.177                    |
| G  | 5     | 444.209<br>444.269 (5)     | 427.182<br>427.495 (7)    | -                                                 | -                                                  | 426.198                    |
| V  | 6     | 543.277<br>*543.255 (78)   | 526.251                   | -                                                 | -                                                  | 525.267<br>*525.202 (30)   |
| S  | 7     | 630.309<br>*630.281 (6)    | 613.283                   | -                                                 | -                                                  | 612.299<br>*612.370 (19)   |
| P  | 8     | 727.362                    | 710.336<br>*710.116 (71)  | -                                                 | -                                                  | 709.352                    |
| s  | 9     | 894.361                    | 877.334                   | -                                                 | 796.375                                            | 876.350                    |
| E  | 10    | 1023.403<br>1023.355 (100) | 1006.377                  | -                                                 | 925.417<br>925.444 (35)                            | 1005.393<br>*1005.423 (21) |
| s  | 11    | 1190.401<br>*1190.319 (93) | 1173.375<br>*1173.429 (7) | 994.430<br>*994.621 (19)<br>*497.487 [2+]<br>(10) | 1092.416<br>*1092.458 (27)                         | 1172.391<br>*1172.403 (28) |
| P  | 12    | 1287.454                   | 1270.428                  | 1091.482                                          | 1189.468                                           | 1269.444                   |
| A  | 13    | 1358.491                   | 1341.465                  | 1162.520                                          | 1260.505<br>*630.281 [2+] (6)                      | 1340.481                   |
| A  | 14    | 1429.528<br>1429.463 (9)   | 1412.502                  | 1233.557                                          | 1331.543<br>1331.457 (16)                          | 1411.518                   |
| E  | 15    | 1558.571<br>1558.565 (19)  | 1541.545                  | 1362.599<br>*681.402 [2+]<br>(43)                 | 1460.585<br>*730.314 [2+]<br>(41)<br>1460.612 (22) | 1540.560<br>1540.570 (6)   |
| R  | 16    | -                          | -                         | -                                                 | -                                                  | -                          |

### C-terminal ions

| AA | C-ion | y                                                 | y*                                | y-196                                             | y-98                              | yo                                |
|----|-------|---------------------------------------------------|-----------------------------------|---------------------------------------------------|-----------------------------------|-----------------------------------|
| G  | 16    | -                                                 | -                                 | -                                                 | -                                 | -                                 |
| S  | 15    | 1675.661                                          | 1658.635                          | 1479.689                                          | 1577.675                          | 1657.651                          |
| E  | 14    | 1588.629                                          | 1571.603                          | 1392.657                                          | 1490.643                          | 1570.619                          |
| L  | 13    | 1459.587<br>*730.314 [2+]<br>(41)<br>1459.622 (4) | 1442.560<br>*1442.608 (2)         | 1263.615                                          | 1361.601<br>*681.402 [2+]<br>(43) | 1441.576                          |
| G  | 12    | 1346.503<br>1346.388 (27)<br>674.091 [2+] (11)    | 1329.476<br>*664.761 [2+] (4)     | 1150.531<br>1150.325 (8)                          | 1248.517<br>1248.557 (15)         | 1328.492<br>*664.761 [2+] (4)     |
| V  | 11    | 1289.481<br>1289.449 (8)                          | 1272.455                          | 1093.509<br>1093.386 (28)                         | 1191.495                          | 1271.471                          |
| S  | 10    | 1190.413<br>*1190.319 (93)                        | 1173.386<br>*1173.429 (7)         | 994.441<br>*994.621 (19)<br>*497.487 [2+]<br>(10) | 1092.427<br>*1092.458 (27)        | 1172.402<br>*1172.403 (28)        |
| P  | 9     | 1103.381<br>1103.668 (4)                          | 1086.354<br>*543.255 [2+]<br>(78) | 907.409<br>907.466 (3)                            | 1005.395<br>*1005.423 (21)        | 1085.370<br>*543.255 [2+]<br>(78) |
| s  | 8     | 1006.328                                          | 989.301                           | 810.356                                           | 908.342<br>908.564 (9)            | 988.317<br>988.123 (4)            |
| E  | 7     | 839.330                                           | 822.303                           | -                                                 | 741.344                           | 821.319                           |

|   |   |                          |                         |   |                          |                          |
|---|---|--------------------------|-------------------------|---|--------------------------|--------------------------|
| s | 6 | 710.287<br>*710.116 (71) | 693.260                 | - | 612.301<br>*612.370 (19) | 692.276<br>*692.226 (12) |
| P | 5 | 543.289<br>*543.255 (78) | 526.262                 | - | -                        | 525.278<br>*525.202 (30) |
| A | 4 | 446.236                  | 429.209                 | - | -                        | 428.225                  |
| A | 3 | 375.199<br>375.378 (4)   | 358.172                 | - | -                        | 357.188                  |
| E | 2 | 304.162<br>304.246 (10)  | 287.135<br>*287.233 (3) | - | -                        | 286.151                  |
| R | 1 | 175.119                  | 158.092                 | - | -                        | 157.108                  |

### Ion distribution

| Threshold | Ion count | Matches | % matched |
|-----------|-----------|---------|-----------|
| 0         | 76        | 47      | 61        |
| 0.5       | 76        | 47      | 61        |
| 1         | 76        | 47      | 61        |
| 2         | 74        | 46      | 62        |
| 3         | 71        | 45      | 63        |
| 4         | 64        | 42      | 65        |
| 5         | 51        | 34      | 66        |
| 10        | 36        | 24      | 66        |

### Observed ions > 1%

| m/z     | Intensity           | % max | Assignment (delta)                                                                |
|---------|---------------------|-------|-----------------------------------------------------------------------------------|
| 274.050 | 12.15 <sub>2</sub>  | 4.01  | b3 (-0.05)                                                                        |
| 287.233 | 10.32 <sub>2</sub>  | 3.40  | y2* (0.09) : z2 (0.09)                                                            |
| 304.246 | 31.94 <sub>2</sub>  | 10.55 | y2 (0.08)                                                                         |
| 313.191 | 10.04 <sub>2</sub>  | 3.31  |                                                                                   |
| 343.346 | 29.56 <sub>2</sub>  | 9.76  |                                                                                   |
| 359.227 | 14.71 <sub>2</sub>  | 4.85  | a4 (0.03)                                                                         |
| 375.378 | 14.25 <sub>2</sub>  | 4.70  | y3 (0.17)                                                                         |
| 399.289 | 11.99 <sub>2</sub>  | 3.96  | a5* (0.10)                                                                        |
| 412.397 | 14.49 <sub>2</sub>  | 4.78  |                                                                                   |
| 416.571 | 20.78 <sub>2</sub>  | 6.86  | a5 (0.35)                                                                         |
| 427.495 | 22.69 <sub>2</sub>  | 7.49  | b5* (0.31)                                                                        |
| 444.269 | 16.58 <sub>2</sub>  | 5.47  | b5 (0.05)                                                                         |
| 497.487 | 31.53 <sub>2</sub>  | 10.41 | a6o (0.21) : b11-196[2+]<br>(-0.23) : y10-196[2+] (-0.23)                         |
| 507.205 | 33.60 <sub>2</sub>  | 11.10 |                                                                                   |
| 513.215 | 47.95 <sub>2</sub>  | 15.84 |                                                                                   |
| 525.202 | 92.92 <sub>2</sub>  | 30.69 | b6o (-0.06) : y5o (-0.07)                                                         |
| 543.255 | 236.82 <sub>2</sub> | 78.23 | y9o[2+] (0.06) : b6 (-0.02) :<br>y5 (-0.03) : y9*[2+] (-0.42) :<br>z9[2+] (-0.42) |
| 544.236 | 32.65 <sub>2</sub>  | 10.78 |                                                                                   |
| 594.263 | 22.64 <sub>2</sub>  | 7.47  |                                                                                   |

|          |                     |       |                                                         |
|----------|---------------------|-------|---------------------------------------------------------|
| 612.370  | 60.08 <sub>3</sub>  | 19.84 | b7o (0.07) : y6-98 (0.06)                               |
| 630.281  | 19.16 <sub>3</sub>  | 6.32  | a12[2+] (0.04) : b7 (-0.02) :<br>b13-98[2+] (-0.47)     |
| 645.790  | 14.14 <sub>3</sub>  | 4.67  |                                                         |
| 658.190  | 24.91 <sub>3</sub>  | 8.22  |                                                         |
| 664.761  | 14.66 <sub>3</sub>  | 4.84  | y12o[2+] (0.01) : y12*[2+]<br>(-0.48) : z12[2+] (-0.48) |
| 674.091  | 33.87 <sub>3</sub>  | 11.18 | y12[2+] (0.33)                                          |
| 681.402  | 131.72 <sub>3</sub> | 43.51 | y13-98[2+] (0.09) : a8o<br>(0.04) : b15-196[2+] (-0.40) |
| 692.226  | 38.82 <sub>3</sub>  | 12.82 | a14o[2+] (-0.03) : y6o<br>(-0.05)                       |
| 710.116  | 217.03 <sub>3</sub> | 71.69 | y6 (-0.17) : b8* (-0.22)                                |
| 730.314  | 125.54 <sub>3</sub> | 41.47 | y13[2+] (0.01) : b15-98[2+]<br>(-0.48)                  |
| 760.018  | 49.24 <sub>3</sub>  | 16.26 |                                                         |
| 769.078  | 269.69 <sub>3</sub> | 89.09 |                                                         |
| 780.511  | 36.42 <sub>3</sub>  | 12.03 |                                                         |
| 795.613  | 32.49 <sub>3</sub>  | 10.73 |                                                         |
| 800.337  | 81.75 <sub>3</sub>  | 27.00 |                                                         |
| 805.065  | 32.57 <sub>3</sub>  | 10.75 |                                                         |
| 809.014  | 106.17 <sub>3</sub> | 35.07 | x14[2+] (0.19)                                          |
| 889.410  | 14.04 <sub>3</sub>  | 4.63  |                                                         |
| 907.466  | 11.80 <sub>3</sub>  | 3.89  | y9-196 (0.05)                                           |
| 908.564  | 28.82 <sub>3</sub>  | 9.52  | y8-98 (0.22)                                            |
| 925.444  | 107.27 <sub>3</sub> | 35.43 | b10-98 (0.02)                                           |
| 947.482  | 11.76 <sub>3</sub>  | 3.88  |                                                         |
| 988.123  | 14.40 <sub>3</sub>  | 4.75  | y8o (-0.19)                                             |
| 994.621  | 59.01 <sub>3</sub>  | 19.49 | b11-196 (0.19) : y10-196<br>(0.17)                      |
| 1005.423 | 65.63 <sub>3</sub>  | 21.68 | b10o (0.02) : y9-98 (0.02)                              |
| 1023.355 | 302.70 <sub>3</sub> | 100   | b10 (-0.04)                                             |
| 1024.326 | 89.72 <sub>3</sub>  | 29.63 |                                                         |
| 1092.458 | 84.57 <sub>3</sub>  | 27.93 | b11-98 (0.04) : y10-98<br>(0.03)                        |
| 1093.386 | 86.32 <sub>3</sub>  | 28.51 | y11-196 (-0.12)                                         |
| 1103.668 | 15.03 <sub>3</sub>  | 4.96  | y9 (0.28)                                               |
| 1142.535 | 12.46 <sub>3</sub>  | 4.11  |                                                         |
| 1150.325 | 24.89 <sub>3</sub>  | 8.22  | y12-196 (-0.20)                                         |
| 1172.403 | 86.91 <sub>3</sub>  | 28.71 | b11o (0.01) : y10o (0.00)                               |
| 1173.429 | 21.34 <sub>3</sub>  | 7.04  | b11* (0.05) : y10* (0.04) :<br>z10 (0.04)               |
| 1190.319 | 283.49 <sub>3</sub> | 93.65 | b11 (-0.08) : y10 (-0.09)                               |
| 1242.567 | 12.33 <sub>3</sub>  | 4.07  | a12* (0.13)                                             |
| 1248.557 | 46.79 <sub>3</sub>  | 15.45 | y12-98 (0.03)                                           |
| 1249.475 | 49.72 <sub>3</sub>  | 16.42 |                                                         |
| 1261.514 | 8.84 <sub>3</sub>   | 2.92  |                                                         |

|          |                    |       |                          |
|----------|--------------------|-------|--------------------------|
| 1289.449 | 24.42 <sub>,</sub> | 8.06  | y11 (-0.03)              |
| 1290.341 | 26.41 <sub>,</sub> | 8.72  |                          |
| 1319.589 | 11.69 <sub>,</sub> | 3.86  |                          |
| 1331.457 | 48.48 <sub>,</sub> | 16.01 | b14-98 (-0.08)           |
| 1332.475 | 32.57 <sub>,</sub> | 10.75 |                          |
| 1346.388 | 84.01 <sub>,</sub> | 27.75 | y12 (-0.11)              |
| 1347.544 | 14.65 <sub>,</sub> | 4.83  |                          |
| 1377.688 | 11.49 <sub>,</sub> | 3.79  |                          |
| 1429.463 | 27.51 <sub>,</sub> | 9.08  | b14 (-0.06)              |
| 1442.608 | 7.40 <sub>,</sub>  | 2.44  | y13* (0.04) : z13 (0.04) |
| 1459.622 | 12.52 <sub>,</sub> | 4.13  | y13 (0.03)               |
| 1460.612 | 69.53 <sub>,</sub> | 22.96 | b15-98 (0.02)            |
| 1471.483 | 7.56 <sub>,</sub>  | 2.49  |                          |
| 1518.723 | 4.94 <sub>,</sub>  | 1.63  |                          |
| 1540.570 | 20.68 <sub>,</sub> | 6.83  | b15o (0.00)              |
| 1558.565 | 60.48 <sub>,</sub> | 19.98 | b15 (-0.00)              |
| 1559.521 | 22.34 <sub>,</sub> | 7.38  |                          |
| 1657.733 | 5.95               | 1.96  | y15o (0.08)              |

S53

# ProPhosSI MS/MS report

Mass: 826.862086 Charge: 2+

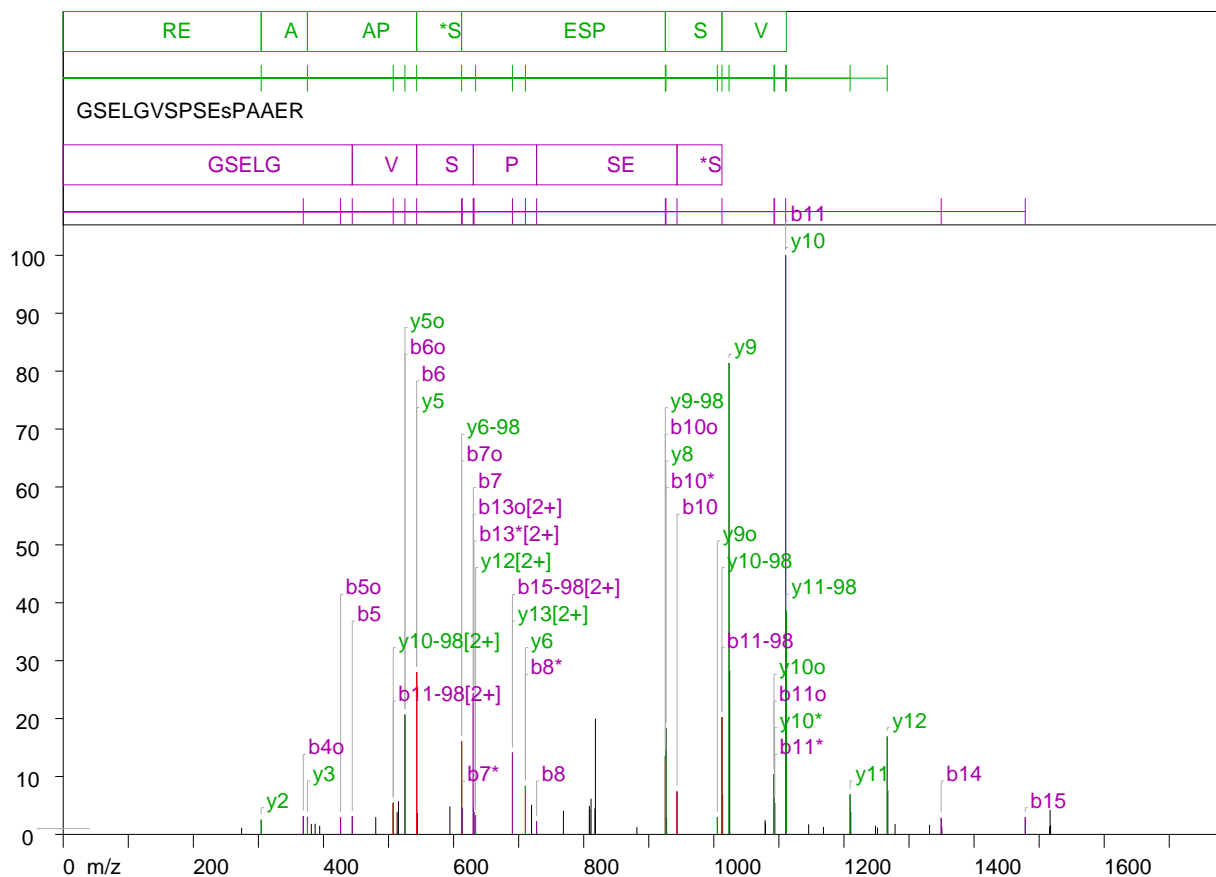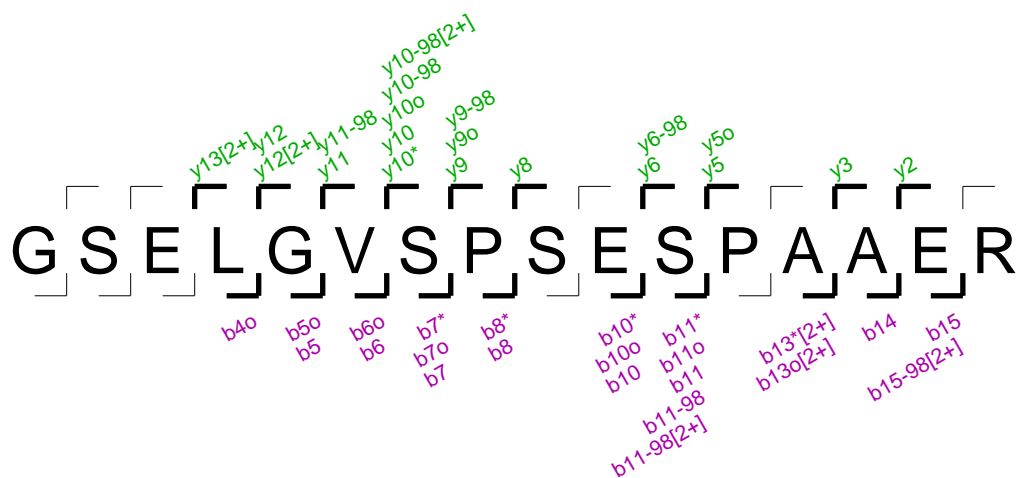

# GSELVSPSESPAAER

(72) 43 GSELVSPSESPAAER 58 1651.709 (-0.0005) Da

|                         |     |
|-------------------------|-----|
| Parent Ion              | m/z |
| No parent ions observed |     |

## Modifications and supporting evidence

| Position | Residue ID | Modification | Evidence        |
|----------|------------|--------------|-----------------|
| 11       | (53)       | Phospho (ST) | b10 => b14, b15 |

## Spectrum interpretation

| Rule                                   | passed/tests | Description                                                                                                                                                                                                                                                                                                                                                                                                                                                                                                                                                                                                                                                                  |
|----------------------------------------|--------------|------------------------------------------------------------------------------------------------------------------------------------------------------------------------------------------------------------------------------------------------------------------------------------------------------------------------------------------------------------------------------------------------------------------------------------------------------------------------------------------------------------------------------------------------------------------------------------------------------------------------------------------------------------------------------|
| Parent ions present                    | 0/1          | Parent ions corresponding to the parent fragment - 1 phosphate ions were not found                                                                                                                                                                                                                                                                                                                                                                                                                                                                                                                                                                                           |
| Three -98 Ions present                 | 1/1          | 6 des-phospho fragment ions were found.                                                                                                                                                                                                                                                                                                                                                                                                                                                                                                                                                                                                                                      |
| Unique -98 transitions present         | 1/1          |                                                                                                                                                                                                                                                                                                                                                                                                                                                                                                                                                                                                                                                                              |
| Four Sequential b or y ions            | 1/1          | Sequence of four b ions found from b5 to b8.                                                                                                                                                                                                                                                                                                                                                                                                                                                                                                                                                                                                                                 |
| Five of six sequential ions present    | 1/1          | Five of Six ions found between b5 and b10<br>Five of Six ions found between b6 and b11                                                                                                                                                                                                                                                                                                                                                                                                                                                                                                                                                                                       |
| Proline directed fragmentation pattern | 4/4          | NOTE: S-P is a low abundance fragmentation.<br>PASS: y9-98> y8-98<br/><br>PASS: b8< b7 with ratio 10.8<br/><br>NOTE: S-P is a low abundance fragmentation.<br>PASS: y5> y4<br/><br>PASS: b12-98< b11-98<br/>                                                                                                                                                                                                                                                                                                                                                                                                                                                                 |
| PhosphoTyrosine transition present     | 0/0          | 0 of 0 phosphotyrosine transitions were found.                                                                                                                                                                                                                                                                                                                                                                                                                                                                                                                                                                                                                               |
| Six of top ten ions identified         | 8/6          | ion 1 (mass: 1110.391: intensity: 9917.15)<br>assigned 2 times<br>ion 2 (mass: 1023.397: intensity: 8074.30)<br>assigned 1 times<br>ion 3 (mass: 1111.410: intensity: 3828.31)<br>assigned 1 times<br>ion 4 (mass: 1024.427: intensity: 2803.53)<br>assigned 0 times<br>ion 5 (mass: 543.253: intensity: 2777.18)<br>assigned 2 times<br>ion 6 (mass: 630.304: intensity: 2420.94)<br>assigned 2 times<br>ion 7 (mass: 525.196: intensity: 2051.77)<br>assigned 2 times<br>ion 8 (mass: 1012.479: intensity: 2009.85)<br>assigned 2 times<br>ion 9 (mass: 817.985: intensity: 1983.84)<br>assigned 0 times<br>ion 10 (mass: 926.387: intensity: 1820.69)<br>assigned 2 times |

## Ion Table

33 ions assigned of 50 ions above threshold (66%).

### N-terminal ions

| AA | N-ion | b       | b*      | b-98 | bo      |
|----|-------|---------|---------|------|---------|
| G  | 1     | 58.029  | 41.002  | -    | 40.018  |
| S  | 2     | 145.061 | 128.034 | -    | 127.050 |
| E  | 3     | 274.103 | 257.077 | -    | 256.093 |
| L  | 4     | 387.187 | 370.161 | -    | 369.177 |



|   |    |                             |                              |                                                 |                                |
|---|----|-----------------------------|------------------------------|-------------------------------------------------|--------------------------------|
| - | -  | -                           | -                            | -                                               | 368.963 (3)                    |
| G | 5  | 444.209<br>444.258 (3)      | 427.182                      | -                                               | 426.198<br>426.307 (2)         |
| V | 6  | 543.277<br>*543.253 (28)    | 526.251                      | -                                               | 525.267<br>*525.196 (20)       |
| S | 7  | 630.309<br>*630.304 (24)    | 613.283<br>*613.308 (4)      | -                                               | 612.299<br>*612.324 (16)       |
| P | 8  | 727.362<br>727.596 (2)      | 710.336<br>*710.399 (8)      | -                                               | 709.352                        |
| S | 9  | 814.394                     | 797.368                      | -                                               | 796.384                        |
| E | 10 | 943.437<br>943.439 (7)      | 926.410<br>*926.387 (18)     | -                                               | 925.426<br>*925.455 (13)       |
| s | 11 | 1110.435<br>*1110.391 (100) | 1093.409<br>*1093.486 (5)    | 1012.449<br>*1012.479 (20)<br>*507.225 [2+] (5) | 1092.425<br>*1092.467 (10)     |
| P | 12 | 1207.488                    | 1190.461                     | 1109.502                                        | 1189.477                       |
| A | 13 | 1278.525                    | 1261.498<br>631.381 [2+] (3) | 1180.539                                        | 1260.514<br>*630.304 [2+] (24) |
| A | 14 | 1349.562<br>1349.464 (2)    | 1332.536                     | 1251.576                                        | 1331.552                       |
| E | 15 | 1478.605<br>1478.679 (2)    | 1461.578                     | 1380.619<br>*690.465 [2+] (14)                  | 1460.594                       |
| R | 16 | -                           | -                            | -                                               | -                              |

### C-terminal ions

| AA | C-ion | y                                             | y*                        | y-98                                            | yo                         |
|----|-------|-----------------------------------------------|---------------------------|-------------------------------------------------|----------------------------|
| G  | 16    | -                                             | -                         | -                                               | -                          |
| S  | 15    | 1595.695                                      | 1578.668                  | 1497.709                                        | 1577.684                   |
| E  | 14    | 1508.663                                      | 1491.636                  | 1410.677                                        | 1490.652                   |
| L  | 13    | 1379.620<br>*690.465 [2+] (14)                | 1362.594                  | 1281.634                                        | 1361.610                   |
| G  | 12    | 1266.536<br>633.810 [2+] (3)<br>1266.490 (16) | 1249.510                  | 1168.550                                        | 1248.526                   |
| V  | 11    | 1209.515<br>1209.448 (6)                      | 1192.488                  | 1111.529<br>1111.410 (38)                       | 1191.504                   |
| S  | 10    | 1110.446<br>*1110.391 (100)                   | 1093.420<br>*1093.486 (5) | 1012.460<br>*1012.479 (20)<br>*507.225 [2+] (5) | 1092.436<br>*1092.467 (10) |
| P  | 9     | 1023.414<br>1023.397 (81)                     | 1006.388                  | 925.428<br>*925.455 (13)                        | 1005.404<br>1005.387 (2)   |
| S  | 8     | 926.362<br>*926.387 (18)                      | 909.335                   | 828.376                                         | 908.351                    |
| E  | 7     | 839.330                                       | 822.303                   | 741.344                                         | 821.319                    |
| s  | 6     | 710.287<br>*710.399 (8)                       | 693.260                   | 612.301<br>*612.324 (16)                        | 692.276                    |
| P  | 5     | 543.289<br>*543.253 (28)                      | 526.262                   | -                                               | 525.278<br>*525.196 (20)   |
| A  | 4     | 446.236                                       | 429.209                   | -                                               | 428.225                    |
| A  | 3     | 375.199<br>375.320 (3)                        | 358.172                   | -                                               | 357.188                    |
| E  | 2     | 304.162<br>304.308 (2)                        | 287.135                   | -                                               | 286.151                    |
| R  | 1     | 175.119                                       | 158.092                   | -                                               | 157.108                    |

### Ion distribution

| Threshold | Ion count | Matches | % matched |
|-----------|-----------|---------|-----------|
| 0         | 80        | 47      | 58        |
| 0.5       | 77        | 46      | 59        |
| 1         | 64        | 41      | 64        |
| 2         | 50        | 33      | 66        |
| 3         | 40        | 26      | 65        |
| 4         | 32        | 21      | 65        |
| 5         | 25        | 19      | 76        |
| 10        | 15        | 13      | 86        |

### Observed ions > 1%

| m/z     | Intensity            | % max | Assignment (delta)                          |
|---------|----------------------|-------|---------------------------------------------|
| 274.222 | 114.99 <sub>s</sub>  | 1.15  | b3 (0.11)                                   |
| 304.308 | 250.62 <sub>s</sub>  | 2.52  | y2 (0.14)                                   |
| 368.963 | 315.51 <sub>s</sub>  | 3.18  | b4o (-0.21)                                 |
| 375.320 | 298.77 <sub>s</sub>  | 3.01  | y3 (0.12)                                   |
| 381.311 | 178.56 <sub>s</sub>  | 1.80  |                                             |
| 387.182 | 182.47 <sub>s</sub>  | 1.83  | b4 (-0.00)                                  |
| 394.193 | 148.79 <sub>s</sub>  | 1.50  | a9[2+] (0.48)                               |
| 426.307 | 291.38 <sub>s</sub>  | 2.93  | b5o (0.10)                                  |
| 444.258 | 310.31 <sub>s</sub>  | 3.12  | b5 (0.04)                                   |
| 480.337 | 296.34 <sub>s</sub>  | 2.98  | c10[2+] (-0.39)                             |
| 507.225 | 541.56 <sub>s</sub>  | 5.46  | b11-98[2+] (0.49) : y10-98[2+] (0.49)       |
| 513.223 | 381.30 <sub>s</sub>  | 3.84  |                                             |
| 515.288 | 567.13 <sub>s</sub>  | 5.71  | a6 (0.00)                                   |
| 525.196 | 2051.77 <sub>s</sub> | 20.68 | b6o (-0.07) : y5o (-0.08)                   |
| 543.253 | 2777.18 <sub>s</sub> | 28.00 | b6 (-0.02) : y5 (-0.03)                     |
| 544.237 | 368.23 <sub>s</sub>  | 3.71  |                                             |
| 594.306 | 477.11 <sub>s</sub>  | 4.81  |                                             |
| 612.324 | 1599.36 <sub>s</sub> | 16.12 | b7o (0.02) : y6-98 (0.02) : c12[2+] (-0.43) |
| 613.308 | 458.57 <sub>s</sub>  | 4.62  | c12[2+] (0.54) : b7* (0.02)                 |
| 630.304 | 2420.94 <sub>s</sub> | 24.41 | b7 (-0.00) : b13o[2+] (-0.45)               |
| 631.381 | 381.05 <sub>s</sub>  | 3.84  | b13*[2+] (0.12)                             |
| 633.810 | 326.95 <sub>s</sub>  | 3.29  | y12[2+] (0.03)                              |
| 690.465 | 1400.12 <sub>s</sub> | 14.11 | y13[2+] (0.15) : b15-98[2+] (-0.34)         |
| 710.399 | 832.98 <sub>s</sub>  | 8.39  | y6 (0.11) : b8* (0.06)                      |
| 719.822 | 508.30 <sub>s</sub>  | 5.12  |                                             |
| 727.596 | 223.33 <sub>s</sub>  | 2.25  | b8 (0.23)                                   |
| 768.813 | 405.19 <sub>s</sub>  | 4.08  | a9o (0.42) : x14[2+] (-0.02) : a9* (-0.56)  |
| 808.624 | 489.41 <sub>s</sub>  | 4.93  |                                             |
| 809.440 | 435.11 <sub>s</sub>  | 4.38  |                                             |
| 811.256 | 612.58 <sub>s</sub>  | 6.17  |                                             |

|          |                      |       |                                        |
|----------|----------------------|-------|----------------------------------------|
| 817.223  | 445.11 <sub>3</sub>  | 4.48  |                                        |
| 817.985  | 1983.84 <sub>3</sub> | 20.00 |                                        |
| 881.797  | 124.57 <sub>3</sub>  | 1.25  |                                        |
| 925.455  | 1340.57 <sub>3</sub> | 13.51 | b10o (0.02) : y9-98 (0.02)             |
| 926.387  | 1820.69 <sub>3</sub> | 18.35 | y8 (0.02) : b10* (-0.02)               |
| 927.395  | 295.77 <sub>3</sub>  | 2.98  |                                        |
| 943.439  | 734.95 <sub>3</sub>  | 7.41  | b10 (0.00)                             |
| 1005.387 | 295.99 <sub>3</sub>  | 2.98  | y9o (-0.01)                            |
| 1012.479 | 2009.85 <sub>3</sub> | 20.26 | b11-98 (0.02) : y10-98 (0.01)          |
| 1013.568 | 681.76 <sub>3</sub>  | 6.87  |                                        |
| 1023.397 | 8074.30 <sub>3</sub> | 81.41 | y9 (-0.01)                             |
| 1024.427 | 2803.53 <sub>3</sub> | 28.26 |                                        |
| 1078.777 | 245.92 <sub>3</sub>  | 2.47  |                                        |
| 1079.488 | 201.12 <sub>3</sub>  | 2.02  |                                        |
| 1092.467 | 1029.66 <sub>3</sub> | 10.38 | b11o (0.04) : y10o (0.03)              |
| 1093.486 | 538.53 <sub>3</sub>  | 5.43  | b11* (0.07) : y10* (0.06) : z10 (0.06) |
| 1110.391 | 9917.15 <sub>3</sub> | 100   | b11 (-0.04) : y10 (-0.05)              |
| 1111.410 | 3828.31 <sub>3</sub> | 38.60 | y11-98 (-0.11)                         |
| 1145.703 | 172.71 <sub>3</sub>  | 1.74  |                                        |
| 1168.527 | 127.41 <sub>3</sub>  | 1.28  | y12-98 (-0.02)                         |
| 1209.448 | 688.75 <sub>3</sub>  | 6.94  | y11 (-0.06)                            |
| 1210.514 | 390.48 <sub>3</sub>  | 3.93  |                                        |
| 1248.514 | 148.39 <sub>3</sub>  | 1.49  | y12o (-0.01)                           |
| 1251.481 | 118.09 <sub>3</sub>  | 1.19  | b14-98 (-0.09)                         |
| 1266.490 | 1678.38 <sub>3</sub> | 16.92 | y12 (-0.04)                            |
| 1267.460 | 755.73 <sub>3</sub>  | 7.62  |                                        |
| 1278.547 | 179.36 <sub>3</sub>  | 1.80  | b13 (0.02)                             |
| 1331.582 | 161.68 <sub>3</sub>  | 1.63  | b14o (0.02)                            |
| 1349.464 | 283.02 <sub>3</sub>  | 2.85  | b14 (-0.09)                            |
| 1350.424 | 128.84 <sub>3</sub>  | 1.29  |                                        |
| 1478.679 | 294.20 <sub>3</sub>  | 2.96  | b15 (0.07)                             |
| 1516.155 | 138.97 <sub>3</sub>  | 1.40  |                                        |
| 1516.861 | 419.45 <sub>3</sub>  | 4.22  |                                        |
| 1517.620 | 162.02 <sub>3</sub>  | 1.63  |                                        |

S442 or

S445 or

T446

# ProPhosSI MS/MS report

Mass: 964.433619 Charge: 3+

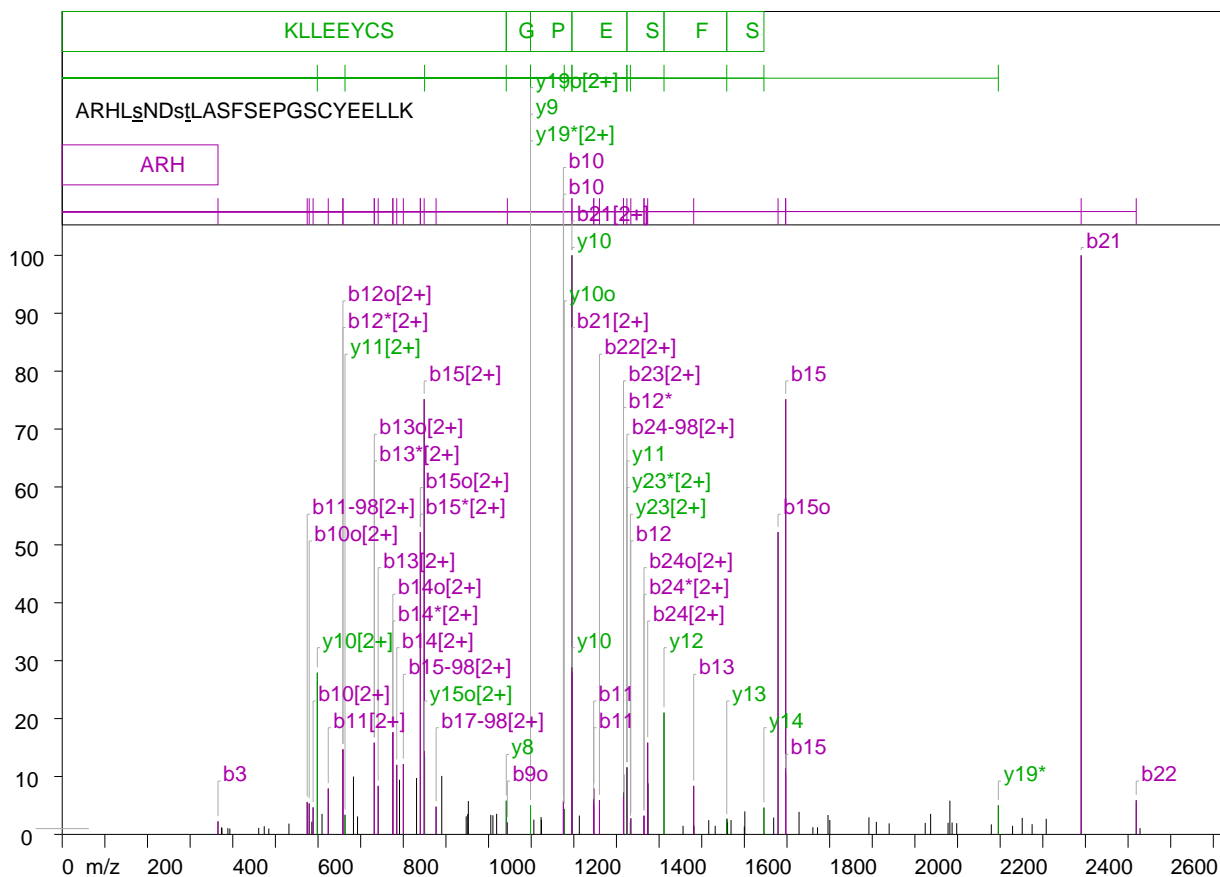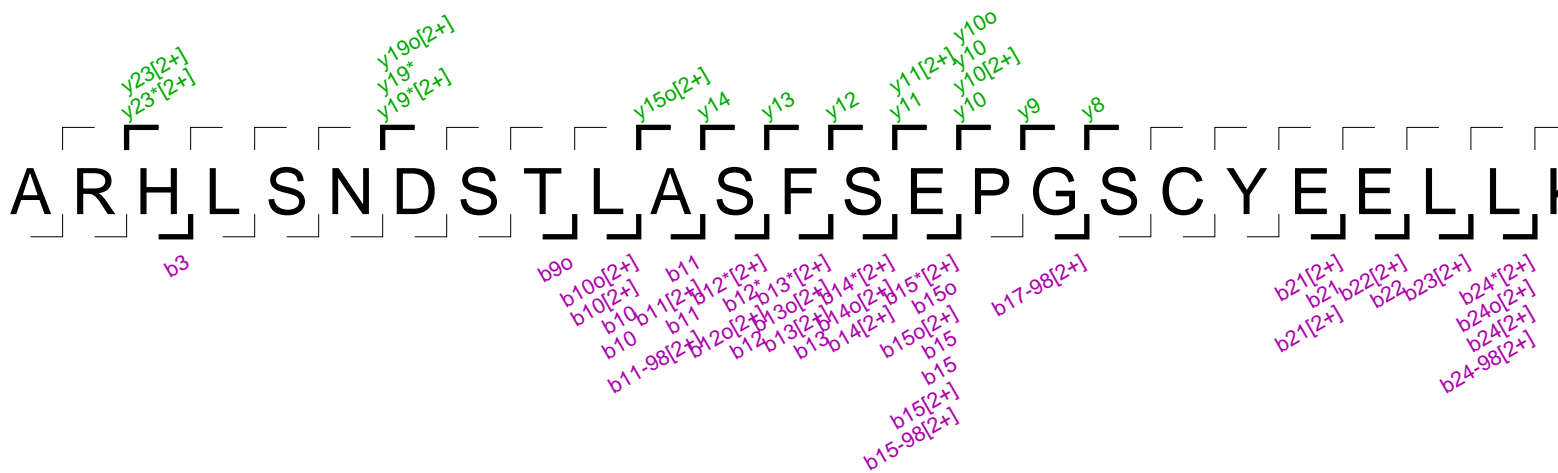

## Cav3.2 human

(49) 438 ARHL<sub>5</sub>ND<sub>5</sub>tLASFSEPGSCYEELLK 462 2890.284 (-0.0071) Da

|                         |     |
|-------------------------|-----|
| Parent Ion              | m/z |
| No parent ions observed |     |

## Modifications and supporting evidence

| Position    | Residue ID          | Modification | Evidence         |
|-------------|---------------------|--------------|------------------|
| 5 or 8 or 9 | (442 or 445 or 446) | Phospho (ST) | b3 => b11-98[2+] |

## Spectrum interpretation

| Rule                                   | passed/tests | Description                                                                                                                                                                                                                                                                                                                                                                                                                                                                                                                                                                                                                                    |
|----------------------------------------|--------------|------------------------------------------------------------------------------------------------------------------------------------------------------------------------------------------------------------------------------------------------------------------------------------------------------------------------------------------------------------------------------------------------------------------------------------------------------------------------------------------------------------------------------------------------------------------------------------------------------------------------------------------------|
| Parent ions present                    | 0/1          | Parent ions corresponding to the parent fragment - 1 phosphate ions were not found                                                                                                                                                                                                                                                                                                                                                                                                                                                                                                                                                             |
| Three -98 Ions present                 | 1/1          | 4 des-phospho fragment ions were found.                                                                                                                                                                                                                                                                                                                                                                                                                                                                                                                                                                                                        |
| Unique -98 transitions present         | 1/1          | transition b3 to b11-98[2+] support unique phosphorylation at position 5, 8 or 9                                                                                                                                                                                                                                                                                                                                                                                                                                                                                                                                                               |
| Four Sequential b or y ions            | 1/1          | Sequence of four y ions found from y8 to y11.                                                                                                                                                                                                                                                                                                                                                                                                                                                                                                                                                                                                  |
| Five of six sequential ions present    | 1/1          | Five of Six ions found between y7 and y12<br>Five of Six ions found between y8 and y13<br>Five of Six ions found between y9 and y14<br>Five of Six ions found between y10 and y15                                                                                                                                                                                                                                                                                                                                                                                                                                                              |
| Proline directed fragmentation pattern | 2/2          | PASS: y10> y9 with ratio 19.8<br>PASS: b16-98< b15-98<                                                                                                                                                                                                                                                                                                                                                                                                                                                                                                                                                                                         |
| PhosphoTyrosine transition present     | 0/0          | 0 of 0 phosphotyrosine transitions were found.                                                                                                                                                                                                                                                                                                                                                                                                                                                                                                                                                                                                 |
| Six of top ten ions identified         | 10/6         | ion 1 (mass: 1195.483; intensity: 5522.62) assigned 2 times<br>ion 2 (mass: 2389.959; intensity: 5522.62) assigned 1 times<br>ion 3 (mass: 1696.960; intensity: 4151.02) assigned 1 times<br>ion 4 (mass: 848.983; intensity: 4151.02) assigned 1 times<br>ion 5 (mass: 1679.059; intensity: 2883.21) assigned 1 times<br>ion 6 (mass: 840.033; intensity: 2883.21) assigned 2 times<br>ion 7 (mass: 598.352; intensity: 1542.04) assigned 1 times<br>ion 8 (mass: 1195.697; intensity: 1542.04) assigned 2 times<br>ion 9 (mass: 1411.548; intensity: 1161.44) assigned 1 times<br>ion 10 (mass: 775.486; intensity: 974.09) assigned 2 times |

## Ion Table

48 ions assigned of 80 ions above threshold (60%).

### N-terminal ions

| AA | N-ion | b                                                                         | b*                                              | b-98                            | bo                                              |
|----|-------|---------------------------------------------------------------------------|-------------------------------------------------|---------------------------------|-------------------------------------------------|
| A  | 1     | 72.044                                                                    | 55.018                                          | -                               | 54.034                                          |
| R  | 2     | 228.146                                                                   | 211.119                                         | -                               | 210.135                                         |
| H  | 3     | 365.204<br>365.334 (2)                                                    | 348.178                                         | -                               | 347.194                                         |
| L  | 4     | 478.289                                                                   | 461.262                                         | -                               | 460.278                                         |
| S  | 5     | 565.321                                                                   | 548.294                                         | -                               | 547.310                                         |
| N  | 6     | 679.364                                                                   | 662.337                                         | -                               | 661.353                                         |
| D  | 7     | 794.390                                                                   | 777.364                                         | -                               | 776.380                                         |
| s  | 8     | 961.389                                                                   | 944.362                                         | 863.403                         | 943.378                                         |
| T  | 9     | 1062.436                                                                  | 1045.410                                        | 964.451                         | 1044.426<br>1044.114 (2)                        |
| L  | 10    | 1175.521<br>588.472 [2+] (4)<br>1175.936 (4)<br>1175.451 (5)              | 1158.494                                        | 1077.535                        | 1157.510<br>579.247 [2+] (5)                    |
| A  | 11    | 1246.558<br>*1246.483 (5)<br>623.974 [2+] (7)<br>1246.941 (7)             | 1229.531                                        | 1148.572<br>*574.617 [2+] (5)   | 1228.547                                        |
| S  | 12    | 1333.590<br>1333.689 (2)                                                  | 1316.563<br>*658.377 [2+] (14)<br>*1316.508 (6) | 1235.604                        | 1315.579<br>*658.377 [2+] (14)                  |
| F  | 13    | 1480.658<br>741.076 [2+] (8)<br>1481.145 (8)                              | 1463.632<br>*731.948 [2+] (15)                  | 1382.672                        | 1462.648<br>*731.948 [2+] (15)                  |
| S  | 14    | 1567.690<br>784.641 [2+] (12)                                             | 1550.664<br>*775.486 [2+] (17)                  | 1469.704                        | 1549.680<br>*775.486 [2+] (17)                  |
| E  | 15    | 1696.733<br>1696.721 (10)<br>1696.960 (75)<br>848.983 [2+] (75)           | 1679.706<br>*840.033 [2+] (52)                  | 1598.747<br>800.083 [2+] (12)   | 1678.722<br>1679.059 (52)<br>*840.033 [2+] (52) |
| P  | 16    | 1793.786                                                                  | 1776.759                                        | 1695.800                        | 1775.775                                        |
| G  | 17    | 1850.807                                                                  | 1833.780                                        | 1752.821<br>876.945 [2+] (4)    | 1832.796                                        |
| S  | 18    | 1937.839                                                                  | 1920.812                                        | 1839.853                        | 1919.828                                        |
| C  | 19    | 2097.870                                                                  | 2080.843                                        | 1999.884                        | 2079.859                                        |
| Y  | 20    | 2260.933                                                                  | 2243.906                                        | 2162.947                        | 2242.922                                        |
| E  | 21    | 2389.976<br>*1195.483 [2+] (100)<br>2389.959 (100)<br>*1195.697 [2+] (27) | 2372.949                                        | 2291.990                        | 2371.965                                        |
| E  | 22    | 2519.018<br>1260.102 [2+] (5)<br>2519.197 (5)                             | 2501.992                                        | 2421.032                        | 2501.008                                        |
| L  | 23    | 2632.102<br>*1316.508 [2+] (6)                                            | 2615.076                                        | 2534.116                        | 2614.092                                        |
| L  | 24    | 2745.186<br>1373.238 [2+] (15)                                            | 2728.160<br>*1364.572 [2+] (3)                  | 2647.200<br>*1324.523 [2+] (11) | 2727.176<br>*1364.572 [2+] (3)                  |
| K  | 25    | -                                                                         | -                                               | -                               | -                                               |

### C-terminal ions

| AA | C-ion | y        | y*       | y-98     | yo       |
|----|-------|----------|----------|----------|----------|
| A  | 25    | -        | -        | -        | -        |
| R  | 24    | 2820.255 | 2803.228 | 2722.269 | 2802.244 |

|   |    |                                                                    |                                                 |          |                                |
|---|----|--------------------------------------------------------------------|-------------------------------------------------|----------|--------------------------------|
| H | 23 | 2664.154<br>1332.681 [2+] (2)                                      | 2647.127<br>*1324.523 [2+] (11)                 | 2566.168 | 2646.143                       |
| L | 22 | 2527.095                                                           | 2510.068                                        | 2429.109 | 2509.084                       |
| S | 21 | 2414.011                                                           | 2396.984                                        | 2316.025 | 2396.000                       |
| N | 20 | 2326.979                                                           | 2309.952                                        | 2228.993 | 2308.968                       |
| D | 19 | 2212.936                                                           | 2195.909<br>*1098.375 [2+] (5)<br>*2195.744 (5) | 2114.950 | 2194.925<br>*1098.375 [2+] (5) |
| s | 18 | 2097.909                                                           | 2080.882                                        | 1999.923 | 2079.898                       |
| T | 17 | 1930.910                                                           | 1913.884                                        | -        | 1912.900                       |
| L | 16 | 1829.863                                                           | 1812.836                                        | -        | 1811.852                       |
| A | 15 | 1716.779                                                           | 1699.752                                        | -        | 1698.768<br>849.875 [2+] (13)  |
| S | 14 | 1645.742<br>1645.849 (4)                                           | 1628.715                                        | -        | 1627.731                       |
| F | 13 | 1558.709<br>1558.650 (2)                                           | 1541.683                                        | -        | 1540.699                       |
| S | 12 | 1411.641<br>1411.548 (21)                                          | 1394.615                                        | -        | 1393.631                       |
| E | 11 | 1324.609<br>*1324.523 (11)<br>663.264 [2+] (3)                     | 1307.582                                        | -        | 1306.598                       |
| P | 10 | 1195.566<br>*1195.483 (100)<br>598.352 [2+] (27)<br>*1195.697 (27) | 1178.540                                        | -        | 1177.556<br>*1177.546 (4)      |
| G | 9  | 1098.514<br>*1098.375 (5)                                          | 1081.487                                        | -        | 1080.503                       |
| S | 8  | 1041.492<br>1041.540 (5)                                           | 1024.466                                        | -        | 1023.482                       |
| C | 7  | 954.460                                                            | 937.434                                         | -        | 936.450                        |
| Y | 6  | 794.430                                                            | 777.403                                         | -        | 776.419                        |
| E | 5  | 631.366                                                            | 614.340                                         | -        | 613.356                        |
| E | 4  | 502.324                                                            | 485.297                                         | -        | 484.313                        |
| L | 3  | 373.281                                                            | 356.254                                         | -        | 355.270                        |
| L | 2  | 260.197                                                            | 243.170                                         | -        | 242.186                        |
| K | 1  | 147.113                                                            | 130.086                                         | -        | 129.102                        |

### Ion distribution

| Threshold | Ion count | Matches | % matched |
|-----------|-----------|---------|-----------|
| 0         | 120       | 61      | 50        |
| 0.5       | 111       | 58      | 52        |
| 1         | 101       | 57      | 56        |
| 2         | 80        | 48      | 60        |
| 3         | 59        | 40      | 67        |
| 4         | 45        | 37      | 82        |
| 5         | 40        | 32      | 80        |
| 10        | 20        | 18      | 90        |

Observed ions > 1%



| m/z      | Intensity            | % max | Assignment (delta)                  |
|----------|----------------------|-------|-------------------------------------|
| 365.334  | 124.49 <sub>3</sub>  | 2.25  | b3 (0.12)                           |
| 373.469  | 65.55 <sub>3</sub>   | 1.18  | y3 (0.18)                           |
| 374.649  | 63.44 <sub>3</sub>   | 1.14  | a7o[2+] (-0.04)                     |
| 388.569  | 59.90 <sub>3</sub>   | 1.08  | b7o[2+] (-0.12) : y6o[2+] (-0.14)   |
| 460.914  | 61.95 <sub>3</sub>   | 1.12  | b4* (-0.34)                         |
| 473.865  | 77.43 <sub>3</sub>   | 1.40  |                                     |
| 484.520  | 55.94 <sub>3</sub>   | 1.01  | y4o (0.20)                          |
| 531.795  | 102.86 <sub>3</sub>  | 1.86  | b9[2+] (0.07)                       |
| 574.617  | 309.46 <sub>3</sub>  | 5.60  | a10[2+] (0.35) : b11-98[2+] (-0.17) |
| 579.247  | 294.62 <sub>3</sub>  | 5.33  | b10o[2+] (-0.01)                    |
| 585.471  | 120.63 <sub>3</sub>  | 2.18  |                                     |
| 588.472  | 257.80 <sub>3</sub>  | 4.66  | b10[2+] (0.20)                      |
| 598.352  | 1542.04 <sub>3</sub> | 27.92 | y10[2+] (0.06)                      |
| 609.356  | 195.70 <sub>3</sub>  | 3.54  | a11[2+] (-0.42)                     |
| 623.974  | 437.67 <sub>3</sub>  | 7.92  | b11[2+] (0.19)                      |
| 658.377  | 810.98 <sub>3</sub>  | 14.68 | b12o[2+] (0.08) : b12*[2+] (-0.40)  |
| 663.264  | 186.79 <sub>3</sub>  | 3.38  | y11[2+] (0.45)                      |
| 683.101  | 552.04 <sub>3</sub>  | 9.99  |                                     |
| 692.682  | 171.22 <sub>3</sub>  | 3.10  |                                     |
| 731.948  | 873.77 <sub>3</sub>  | 15.82 | b13o[2+] (0.12) : b13*[2+] (-0.37)  |
| 741.076  | 463.09 <sub>3</sub>  | 8.38  | b13[2+] (0.24)                      |
| 775.486  | 974.09 <sub>3</sub>  | 17.63 | b14o[2+] (0.14) : b14*[2+] (-0.34)  |
| 784.641  | 663.36 <sub>3</sub>  | 12.01 | b14[2+] (0.29)                      |
| 791.165  | 521.72 <sub>3</sub>  | 9.44  |                                     |
| 800.083  | 670.19 <sub>3</sub>  | 12.13 | b15-98[2+] (0.20)                   |
| 831.073  | 537.55 <sub>3</sub>  | 9.73  |                                     |
| 840.033  | 2883.21 <sub>3</sub> | 52.20 | b15o[2+] (0.16) : b15*[2+] (-0.32)  |
| 848.983  | 4151.02 <sub>3</sub> | 75.16 | b15[2+] (0.11)                      |
| 849.875  | 745.50 <sub>3</sub>  | 13.49 | y15o[2+] (-0.01)                    |
| 876.945  | 264.91 <sub>3</sub>  | 4.79  | b17-98[2+] (0.03)                   |
| 890.170  | 557.87 <sub>3</sub>  | 10.10 |                                     |
| 947.524  | 172.11 <sub>3</sub>  | 3.11  |                                     |
| 951.133  | 194.00 <sub>3</sub>  | 3.51  |                                     |
| 952.564  | 317.62 <sub>3</sub>  | 5.75  |                                     |
| 1005.217 | 185.71 <sub>3</sub>  | 3.36  |                                     |
| 1010.181 | 182.13 <sub>3</sub>  | 3.29  |                                     |
| 1018.949 | 196.12 <sub>3</sub>  | 3.55  |                                     |
| 1041.540 | 321.47 <sub>3</sub>  | 5.82  | y8 (0.04)                           |
| 1044.114 | 113.46 <sub>3</sub>  | 2.05  | b9o (-0.31)                         |

|          |                      |       |                                                                    |
|----------|----------------------|-------|--------------------------------------------------------------------|
| 1098.375 | 278.36 <sub>3</sub>  | 5.04  | y19o[2+] (0.40) : y19*[2+] (-0.08) : z19[2+] (-0.08) : y9 (-0.13)  |
| 1106.189 | 140.33 <sub>3</sub>  | 2.54  |                                                                    |
| 1123.119 | 165.45 <sub>3</sub>  | 2.99  |                                                                    |
| 1124.023 | 139.98 <sub>3</sub>  | 2.53  |                                                                    |
| 1175.451 | 321.99 <sub>3</sub>  | 5.83  | b10 (-0.07)                                                        |
| 1175.936 | 257.80 <sub>3</sub>  | 4.66  | b10 (0.41)                                                         |
| 1177.546 | 242.46 <sub>3</sub>  | 4.39  | y10o (-0.01) : x20[2+] (-0.44)                                     |
| 1195.483 | 5522.62 <sub>3</sub> | 100   | b21[2+] (-0.00) : y10 (-0.08)                                      |
| 1195.697 | 1542.04 <sub>3</sub> | 27.92 | b21[2+] (0.20) : y10 (0.13)                                        |
| 1212.874 | 179.57 <sub>3</sub>  | 3.25  |                                                                    |
| 1246.483 | 284.26 <sub>3</sub>  | 5.14  | a22[2+] (0.46) : b11 (-0.07)                                       |
| 1246.941 | 437.67 <sub>3</sub>  | 7.92  | b11 (0.38)                                                         |
| 1260.102 | 325.68 <sub>3</sub>  | 5.89  | b22[2+] (0.08)                                                     |
| 1316.508 | 351.77 <sub>3</sub>  | 6.36  | b23[2+] (-0.04) : b12* (-0.05)                                     |
| 1317.201 | 572.10 <sub>3</sub>  | 10.35 |                                                                    |
| 1324.523 | 638.53 <sub>3</sub>  | 11.56 | y23*[2+] (0.45) : z23[2+] (0.45) : b24-98[2+] (0.41) : y11 (-0.08) |
| 1332.681 | 123.60 <sub>3</sub>  | 2.23  | y23[2+] (0.10)                                                     |
| 1333.689 | 153.34 <sub>3</sub>  | 2.77  | b12 (0.09)                                                         |
| 1364.572 | 178.03 <sub>3</sub>  | 3.22  | b24o[2+] (0.47) : b24*[2+] (-0.01)                                 |
| 1373.238 | 875.10 <sub>3</sub>  | 15.84 | b24[2+] (0.14)                                                     |
| 1374.002 | 487.56 <sub>3</sub>  | 8.82  |                                                                    |
| 1411.548 | 1161.44 <sub>3</sub> | 21.03 | y12 (-0.09)                                                        |
| 1456.196 | 81.87 <sub>3</sub>   | 1.48  |                                                                    |
| 1480.710 | 92.75 <sub>3</sub>   | 1.67  | b13 (0.05)                                                         |
| 1481.145 | 463.09 <sub>3</sub>  | 8.38  | b13 (0.48)                                                         |
| 1481.733 | 82.70 <sub>3</sub>   | 1.49  |                                                                    |
| 1516.451 | 135.74 <sub>3</sub>  | 2.45  |                                                                    |
| 1531.598 | 81.95 <sub>3</sub>   | 1.48  |                                                                    |
| 1558.650 | 141.85 <sub>3</sub>  | 2.56  | y13 (-0.05)                                                        |
| 1559.369 | 150.70 <sub>3</sub>  | 2.72  |                                                                    |
| 1560.592 | 115.02 <sub>3</sub>  | 2.08  |                                                                    |
| 1568.741 | 136.58 <sub>3</sub>  | 2.47  |                                                                    |
| 1599.887 | 75.71 <sub>3</sub>   | 1.37  |                                                                    |
| 1601.061 | 219.31 <sub>3</sub>  | 3.97  |                                                                    |
| 1645.849 | 255.47 <sub>3</sub>  | 4.62  | y14 (0.10)                                                         |
| 1668.787 | 160.82 <sub>3</sub>  | 2.91  | a15 (0.04)                                                         |
| 1679.059 | 2883.21 <sub>3</sub> | 52.20 | b15o (0.33)                                                        |
| 1696.721 | 580.04 <sub>3</sub>  | 10.50 | b15 (-0.01)                                                        |
| 1696.960 | 4151.02 <sub>3</sub> | 75.16 | b15 (0.22)                                                         |

|          |                      |      |                            |
|----------|----------------------|------|----------------------------|
| 1728.268 | 214.96 <sub>2</sub>  | 3.89 |                            |
| 1760.744 | 68.35 <sub>2</sub>   | 1.23 |                            |
| 1771.605 | 68.23 <sub>2</sub>   | 1.23 |                            |
| 1796.201 | 184.76 <sub>2</sub>  | 3.34 |                            |
| 1800.453 | 136.86 <sub>2</sub>  | 2.47 |                            |
| 1892.169 | 163.13 <sub>2</sub>  | 2.95 | a18o (0.33)                |
| 1909.585 | 119.99 <sub>2</sub>  | 2.17 | a18 (-0.25)                |
| 1939.601 | 105.37 <sub>2</sub>  | 1.90 |                            |
| 2024.197 | 109.78 <sub>2</sub>  | 1.98 |                            |
| 2036.890 | 196.12 <sub>2</sub>  | 3.55 |                            |
| 2077.773 | 111.25 <sub>2</sub>  | 2.01 |                            |
| 2082.072 | 321.47 <sub>2</sub>  | 5.82 |                            |
| 2087.221 | 113.46 <sub>2</sub>  | 2.05 |                            |
| 2098.087 | 106.93 <sub>2</sub>  | 1.93 | b19 (0.21) : y18 (0.17)    |
| 2179.182 | 96.08 <sub>2</sub>   | 1.73 |                            |
| 2195.744 | 278.36 <sub>2</sub>  | 5.04 | y19* (-0.16) : z19 (-0.16) |
| 2229.051 | 81.82 <sub>2</sub>   | 1.48 | y20-98 (0.05)              |
| 2251.722 | 156.79 <sub>2</sub>  | 2.83 |                            |
| 2274.909 | 97.49 <sub>2</sub>   | 1.76 |                            |
| 2308.054 | 148.84 <sub>2</sub>  | 2.69 |                            |
| 2389.959 | 5522.62 <sub>2</sub> | 100  | b21 (-0.01)                |
| 2519.197 | 325.68 <sub>2</sub>  | 5.89 | b22 (0.17)                 |
| 2528.084 | 59.95                | 1.08 |                            |

**S532 or**

**S535**

# ProPhosSI MS/MS report

Mass: 709.655781 Charge: 3+

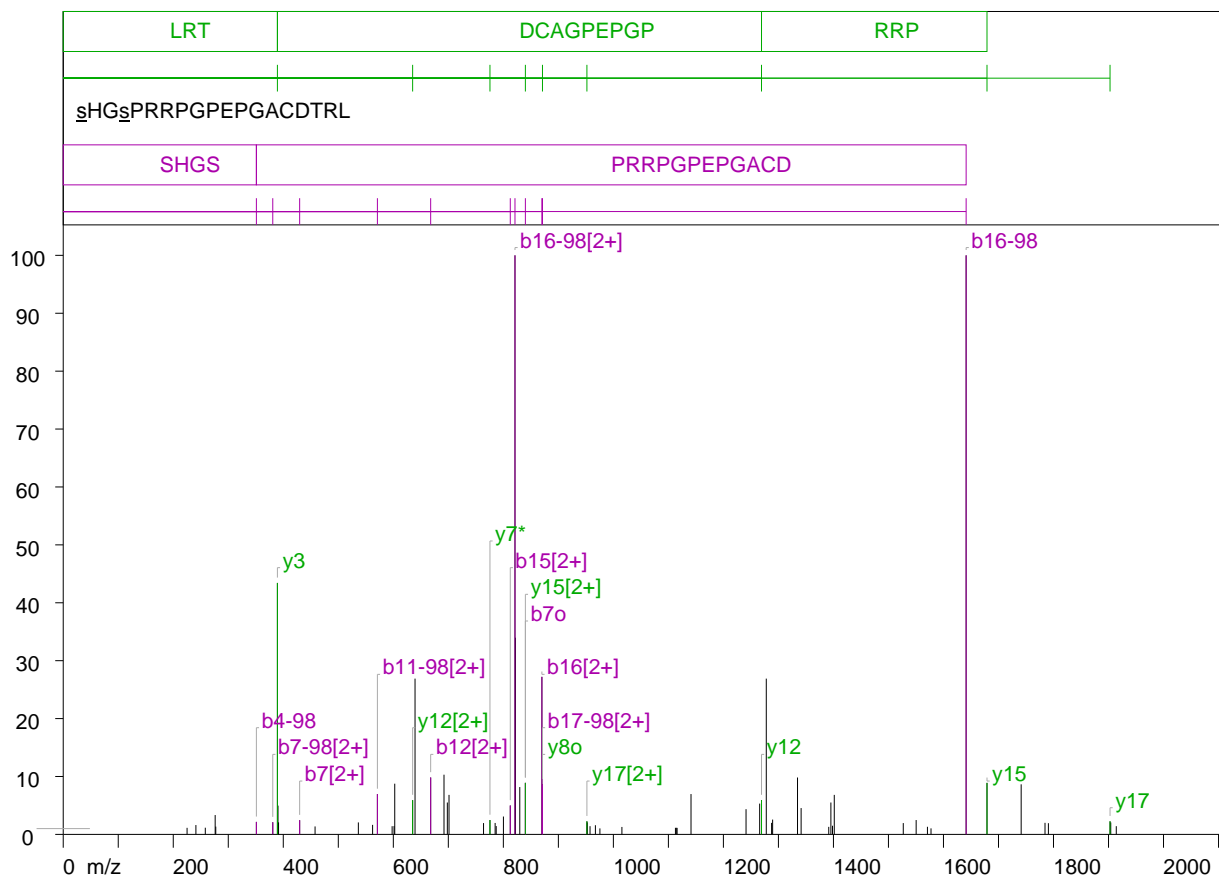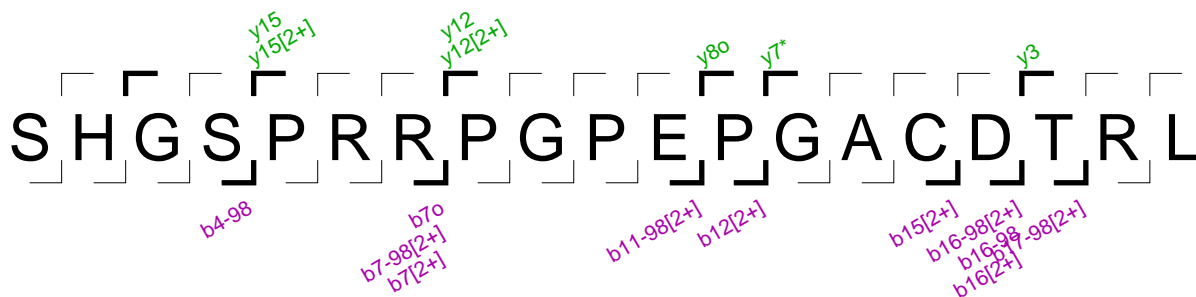

## Cav3.2 human

(21) 532  $\tilde{s}$ HG<sub>s</sub>PRRPGPEPGACDTRL 550 2125.947 (-0.0038) Da

|                         |     |
|-------------------------|-----|
| Parent Ion              | m/z |
| No parent ions observed |     |

## Modifications and supporting evidence

| Position | Residue ID     | Modification | Evidence       |
|----------|----------------|--------------|----------------|
| 1 or 4   | (532) or (535) | Phospho (ST) | b11-98[2+],b12 |

## Spectrum interpretation

| Rule                                   | passed/tests | Description                                                                                                                                                                                                                                                                                                                                                                                                                                                                                                                                                                                                                            |
|----------------------------------------|--------------|----------------------------------------------------------------------------------------------------------------------------------------------------------------------------------------------------------------------------------------------------------------------------------------------------------------------------------------------------------------------------------------------------------------------------------------------------------------------------------------------------------------------------------------------------------------------------------------------------------------------------------------|
| Parent ions present                    | 0/1          | Parent ions corresponding to the parent fragment - 1 phosphate ions were not found                                                                                                                                                                                                                                                                                                                                                                                                                                                                                                                                                     |
| Three -98 Ions present                 | 1/1          | 5 des-phospho fragment ions were found.                                                                                                                                                                                                                                                                                                                                                                                                                                                                                                                                                                                                |
| Unique -98 transitions present         | 0/1          |                                                                                                                                                                                                                                                                                                                                                                                                                                                                                                                                                                                                                                        |
| Four Sequential b or y ions            | 0/1          | Sequence of four y or b ions not observed                                                                                                                                                                                                                                                                                                                                                                                                                                                                                                                                                                                              |
| Five of six sequential ions present    | 0/1          |                                                                                                                                                                                                                                                                                                                                                                                                                                                                                                                                                                                                                                        |
| Proline directed fragmentation pattern | 5/5          | NOTE: S-P is a low abundance fragmentation.<br>PASS: y15> y14<br/><br>PASS: b5-98< b4-98<br/><br>PASS: y12> y11<br/><br>PASS: b8-98< b7-98<br/><br>NOTE: G-P is a low abundance fragmentation.<br>No proline ions at y10<br>No proline ions at b10-98<br/><br>No proline ions at y8<br>PASS: b12-98< b11-98<br/>                                                                                                                                                                                                                                                                                                                       |
| PhosphoTyrosine transition present     | 0/0          | 0 of 0 phosphotyrosine transitions were found.                                                                                                                                                                                                                                                                                                                                                                                                                                                                                                                                                                                         |
| Six of top ten ions identified         | 6/6          | ion 1 (mass: 821.117: intensity: 3508.29) assigned 2 times<br>ion 2 (mass: 1641.226: intensity: 3508.29) assigned 1 times<br>ion 3 (mass: 389.294: intensity: 1523.54) assigned 1 times<br>ion 4 (mass: 822.062: intensity: 1191.72) assigned 0 times<br>ion 5 (mass: 870.061: intensity: 954.60) assigned 1 times<br>ion 6 (mass: 1277.942: intensity: 943.77) assigned 0 times<br>ion 7 (mass: 639.475: intensity: 943.77) assigned 0 times<br>ion 8 (mass: 692.151: intensity: 361.73) assigned 1 times<br>ion 9 (mass: 667.867: intensity: 344.72) assigned 1 times<br>ion 10 (mass: 1334.727: intensity: 344.72) assigned 0 times |

## Ion Table

20 ions assigned of 43 ions above threshold (46%).

### N-terminal ions

| AA | N-ion | b                             | b*       | b-98                                              | bo                      |
|----|-------|-------------------------------|----------|---------------------------------------------------|-------------------------|
| S  | 1     | 88.039                        | 71.013   | -                                                 | 70.029                  |
| H  | 2     | 225.098                       | 208.072  | -                                                 | 207.088                 |
| G  | 3     | 282.120                       | 265.093  | -                                                 | 264.109                 |
| s  | 4     | 449.118                       | 432.092  | 351.132<br>351.115 (2)                            | 431.108                 |
| P  | 5     | 546.171                       | 529.144  | 448.185                                           | 528.160                 |
| R  | 6     | 702.272                       | 685.245  | 604.286                                           | 684.261                 |
| R  | 7     | 858.373<br>429.728 [2+] (2)   | 841.347  | 760.387<br>380.862 [2+] (2)                       | 840.363<br>*840.061 (8) |
| P  | 8     | 955.426                       | 938.399  | 857.440                                           | 937.415                 |
| G  | 9     | 1012.447                      | 995.421  | 914.461                                           | 994.437                 |
| P  | 10    | 1109.500                      | 1092.474 | 1011.514                                          | 1091.490                |
| E  | 11    | 1238.543                      | 1221.516 | 1140.557<br>571.064 [2+] (6)                      | 1220.532                |
| P  | 12    | 1335.595<br>667.867 [2+] (9)  | 1318.569 | 1237.610                                          | 1317.585                |
| G  | 13    | 1392.617                      | 1375.590 | 1294.631                                          | 1374.606                |
| A  | 14    | 1463.654                      | 1446.628 | 1365.668                                          | 1445.643                |
| C  | 15    | 1623.685<br>*812.582 [2+] (4) | 1606.658 | 1525.699                                          | 1605.674                |
| D  | 16    | 1738.712<br>870.061 [2+] (27) | 1721.685 | 1640.726<br>*821.117 [2+] (100)<br>1641.226 (100) | 1720.701                |
| T  | 17    | 1839.759                      | 1822.733 | 1741.773<br>*871.124 [2+] (8)                     | 1821.749                |
| R  | 18    | 1995.860                      | 1978.834 | 1897.875                                          | 1977.850                |
| L  | 19    | -                             | -        | -                                                 | -                       |

### C-terminal ions

| AA | C-ion | y                                             | y*       | y-98     | yo                      |
|----|-------|-----------------------------------------------|----------|----------|-------------------------|
| S  | 19    | -                                             | -        | -        | -                       |
| H  | 18    | 2039.923                                      | 2022.896 | 1941.937 | 2021.912                |
| G  | 17    | 1902.864<br>951.878 [2+] (2)<br>1902.748 (2)  | 1885.838 | 1804.878 | 1884.854                |
| s  | 16    | 1845.843                                      | 1828.816 | 1747.857 | 1827.832                |
| P  | 15    | 1678.844<br>*840.061 [2+] (8)<br>1679.114 (8) | 1661.818 | -        | 1660.834                |
| R  | 14    | 1581.792                                      | 1564.765 | -        | 1563.781                |
| R  | 13    | 1425.690                                      | 1408.664 | -        | 1407.680                |
| P  | 12    | 1269.589<br>635.134 [2+] (5)<br>1269.261 (5)  | 1252.563 | -        | 1251.579                |
| G  | 11    | 1172.537                                      | 1155.510 | -        | 1154.526                |
| P  | 10    | 1115.515                                      | 1098.489 | -        | 1097.505                |
| E  | 9     | 1018.462                                      | 1001.436 | -        | 1000.452                |
| P  | 8     | 889.420                                       | 872.393  | -        | 871.409<br>*871.124 (8) |

|   |   |                         |                         |   |         |
|---|---|-------------------------|-------------------------|---|---------|
| G | 7 | 792.367                 | 775.340<br>*775.676 (2) | - | 774.356 |
| A | 6 | 735.345                 | 718.319                 | - | 717.335 |
| C | 5 | 664.308                 | 647.282                 | - | 646.298 |
| D | 4 | 504.278                 | 487.251                 | - | 486.267 |
| T | 3 | 389.251<br>389.294 (43) | 372.224                 | - | 371.240 |
| R | 2 | 288.203                 | 271.177                 | - | 270.193 |
| L | 1 | 132.102                 | 115.075                 | - | 114.091 |

### Ion distribution

| Threshold | Ion count | Matches | % matched |
|-----------|-----------|---------|-----------|
| 0         | 98        | 35      | 35        |
| 0.5       | 87        | 34      | 39        |
| 1         | 70        | 27      | 38        |
| 2         | 43        | 20      | 46        |
| 3         | 31        | 13      | 41        |
| 4         | 29        | 13      | 44        |
| 5         | 25        | 12      | 48        |
| 10        | 8         | 5       | 62        |

### Observed ions > 1%

| m/z     | Intensity            | % max | Assignment (delta)        |
|---------|----------------------|-------|---------------------------|
| 225.105 | 39.80 <sub>2</sub>   | 1.13  | b4[2+] (0.04) : b2 (0.00) |
| 241.153 | 56.62 <sub>2</sub>   | 1.61  |                           |
| 258.241 | 40.50 <sub>2</sub>   | 1.15  |                           |
| 276.176 | 117.25 <sub>2</sub>  | 3.34  |                           |
| 277.267 | 47.17 <sub>2</sub>   | 1.34  |                           |
| 351.115 | 75.73 <sub>2</sub>   | 2.15  | b4-98 (-0.01)             |
| 380.862 | 73.83 <sub>2</sub>   | 2.10  | b7-98[2+] (0.16)          |
| 389.294 | 1523.54 <sub>2</sub> | 43.42 | y3 (0.04)                 |
| 390.400 | 174.36 <sub>2</sub>  | 4.96  |                           |
| 391.383 | 72.96 <sub>2</sub>   | 2.07  |                           |
| 429.728 | 86.04 <sub>2</sub>   | 2.45  | b7[2+] (0.03)             |
| 457.783 | 48.23 <sub>2</sub>   | 1.37  | b9-98[2+] (0.04)          |
| 536.451 | 72.56 <sub>2</sub>   | 2.06  |                           |
| 562.363 | 57.77 <sub>2</sub>   | 1.64  |                           |
| 571.064 | 244.46 <sub>2</sub>  | 6.96  | b11-98[2+] (0.28)         |
| 597.819 | 49.70 <sub>2</sub>   | 1.41  |                           |
| 601.323 | 50.40 <sub>2</sub>   | 1.43  |                           |
| 602.579 | 307.22 <sub>2</sub>  | 8.75  |                           |
| 635.134 | 207.50 <sub>2</sub>  | 5.91  | y12[2+] (-0.16)           |
| 639.475 | 943.77 <sub>2</sub>  | 26.90 |                           |



|          |                      |       |                                    |
|----------|----------------------|-------|------------------------------------|
| 667.867  | 344.72 <sub>2</sub>  | 9.82  | b12[2+] (-0.43)                    |
| 692.151  | 361.73 <sub>2</sub>  | 10.31 | x5 (-0.15)                         |
| 698.174  | 193.18 <sub>2</sub>  | 5.50  |                                    |
| 701.267  | 239.42 <sub>2</sub>  | 6.82  |                                    |
| 763.972  | 68.57 <sub>2</sub>   | 1.95  |                                    |
| 775.676  | 86.96 <sub>2</sub>   | 2.47  | z7 (0.33) : y7* (0.33)             |
| 785.058  | 69.34 <sub>2</sub>   | 1.97  |                                    |
| 786.993  | 50.49 <sub>2</sub>   | 1.43  |                                    |
| 800.141  | 108.27 <sub>2</sub>  | 3.08  |                                    |
| 812.582  | 175.15 <sub>2</sub>  | 4.99  | b15[2+] (0.23) : a7o (0.21)        |
| 821.117  | 3508.29 <sub>2</sub> | 100   | c15[2+] (0.25) : b16-98[2+] (0.24) |
| 822.062  | 1191.72 <sub>2</sub> | 33.96 |                                    |
| 829.855  | 286.81 <sub>2</sub>  | 8.17  |                                    |
| 840.061  | 312.17 <sub>2</sub>  | 8.89  | y15[2+] (0.13) : b7o (-0.30)       |
| 870.061  | 954.60 <sub>2</sub>  | 27.20 | b16[2+] (0.20)                     |
| 871.124  | 303.39 <sub>2</sub>  | 8.64  | b17-98[2+] (-0.26) : y8o (-0.28)   |
| 951.878  | 79.39 <sub>2</sub>   | 2.26  | y17[2+] (-0.05)                    |
| 952.543  | 72.28 <sub>2</sub>   | 2.06  |                                    |
| 957.563  | 49.77 <sub>2</sub>   | 1.41  |                                    |
| 967.329  | 55.57 <sub>2</sub>   | 1.58  | a9* (-0.09)                        |
| 975.507  | 36.31 <sub>2</sub>   | 1.03  | a18o[2+] (0.07) : a18*[2+] (-0.41) |
| 1015.509 | 45.13 <sub>2</sub>   | 1.28  |                                    |
| 1112.827 | 40.04 <sub>2</sub>   | 1.14  |                                    |
| 1115.244 | 40.23 <sub>2</sub>   | 1.14  | y10 (-0.27)                        |
| 1115.587 | 39.10 <sub>2</sub>   | 1.11  | y10 (0.07)                         |
| 1141.120 | 244.46 <sub>2</sub>  | 6.96  |                                    |
| 1241.159 | 152.77 <sub>2</sub>  | 4.35  |                                    |
| 1265.931 | 186.61 <sub>2</sub>  | 5.31  |                                    |
| 1269.261 | 207.50 <sub>2</sub>  | 5.91  | y12 (-0.32)                        |
| 1277.942 | 943.77 <sub>2</sub>  | 26.90 |                                    |
| 1287.563 | 69.84 <sub>2</sub>   | 1.99  |                                    |
| 1289.461 | 89.72 <sub>2</sub>   | 2.55  | a12o (-0.12)                       |
| 1334.727 | 344.72 <sub>2</sub>  | 9.82  |                                    |
| 1341.234 | 159.53 <sub>2</sub>  | 4.54  |                                    |
| 1391.479 | 45.72 <sub>2</sub>   | 1.30  |                                    |
| 1395.340 | 193.18 <sub>2</sub>  | 5.50  |                                    |
| 1398.330 | 52.41 <sub>2</sub>   | 1.49  |                                    |
| 1401.527 | 239.42 <sub>2</sub>  | 6.82  |                                    |
| 1526.938 | 68.57 <sub>2</sub>   | 1.95  |                                    |
| 1550.345 | 86.96 <sub>2</sub>   | 2.47  |                                    |
| 1570.876 | 46.10 <sub>2</sub>   | 1.31  |                                    |

|          |          |      |               |
|----------|----------|------|---------------|
| 1577.382 | 36.55,   | 1.04 | a15o (-0.29)  |
| 1641.226 | 3508.29, | 100  | b16-98 (0.49) |
| 1679.114 | 312.17,  | 8.89 | y15 (0.26)    |
| 1741.240 | 303.39,  | 8.64 |               |
| 1784.565 | 70.02,   | 1.99 |               |
| 1790.733 | 67.87,   | 1.93 |               |
| 1902.748 | 79.39,   | 2.26 | y17 (-0.11)   |
| 1904.080 | 72.28,   | 2.06 |               |
| 1914.119 | 49.77    | 1.41 |               |

S558 and

S561

(diP)

# ProPhosSI MS/MS report

Mass: 625.751290 Charge: 2+

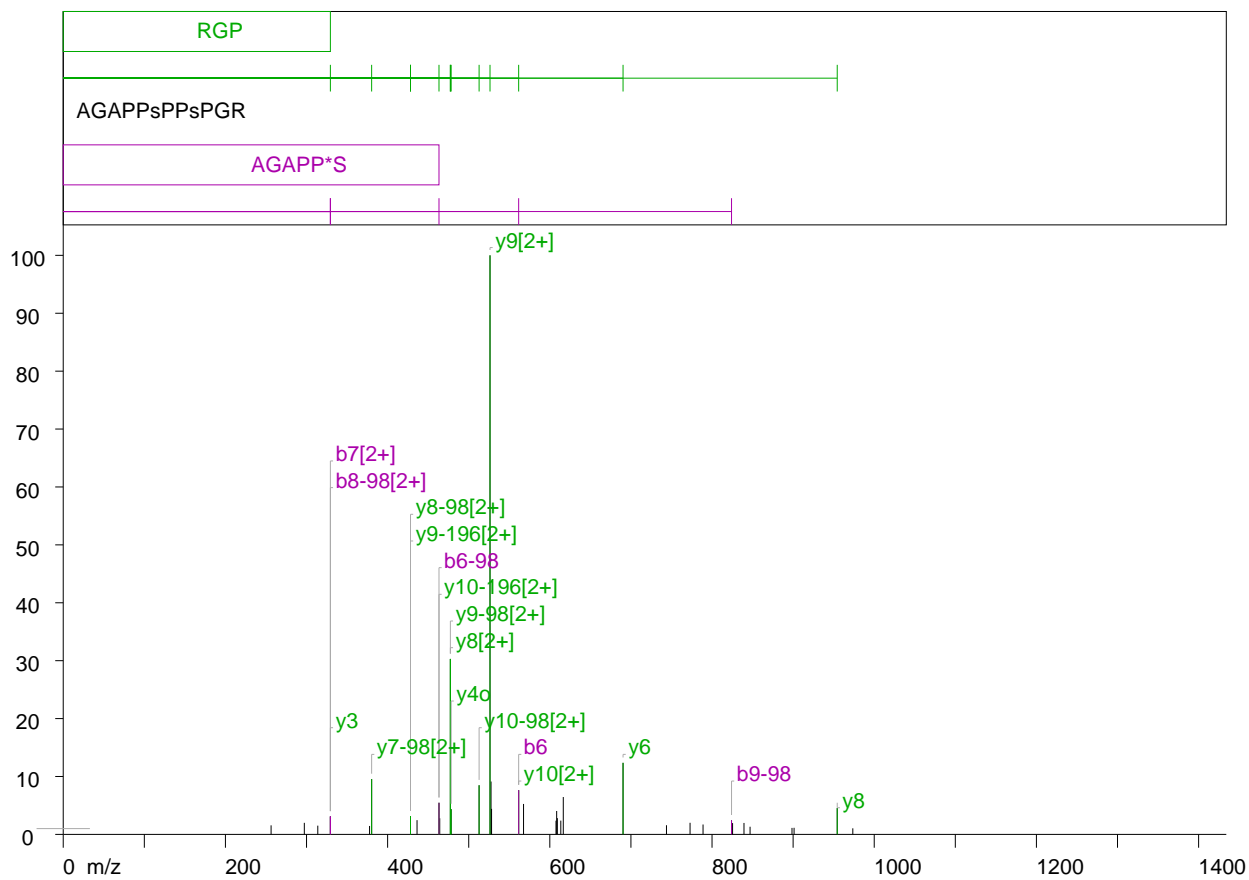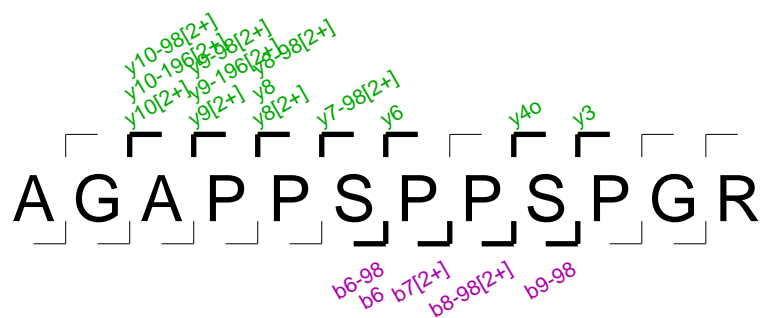

## Cav3.2 human

(21) 553 AGAPPsPPsPGR 564 1249.489 (-0.0024) Da

|                         |     |
|-------------------------|-----|
| Parent Ion              | m/z |
| No parent ions observed |     |

## Modifications and supporting evidence

| Position | Residue ID | Modification | Evidence |
|----------|------------|--------------|----------|
| 6        | (558)      | Phospho (ST) |          |
| 9        | (561)      | Phospho (ST) |          |

## Spectrum interpretation

| Rule                                   | passed/tests | Description                                                                                                                                                                                                                                                                                                                                                                                                                                                                                                                             |
|----------------------------------------|--------------|-----------------------------------------------------------------------------------------------------------------------------------------------------------------------------------------------------------------------------------------------------------------------------------------------------------------------------------------------------------------------------------------------------------------------------------------------------------------------------------------------------------------------------------------|
| Parent ions present                    | 0/1          | Parent ions corresponding to the parent fragment - 2 phosphate ions were not found                                                                                                                                                                                                                                                                                                                                                                                                                                                      |
| Three -98 Ions present                 | 1/1          | 4 des-phospho fragment ions were found.                                                                                                                                                                                                                                                                                                                                                                                                                                                                                                 |
| Unique -98 transitions present         | 1/2          |                                                                                                                                                                                                                                                                                                                                                                                                                                                                                                                                         |
| Four Sequential b or y ions            | 0/1          | Sequence of four y or b ions not observed                                                                                                                                                                                                                                                                                                                                                                                                                                                                                               |
| Five of six sequential ions present    | 0/1          |                                                                                                                                                                                                                                                                                                                                                                                                                                                                                                                                         |
| Proline directed fragmentation pattern | 3/4          | PASS: y9-196> y8-196<br/><br>No proline ions at b4<br/><br>NOTE: P-P is a low abundance fragmentation.<br>No proline ions at y8-196<br>No proline ions at b5<br/><br>NOTE: S-P is a low abundance fragmentation.<br>No proline ions at y6-98<br>PASS: b7-98< b6-98<br/><br>NOTE: P-P is a low abundance fragmentation.<br>No proline ions at y5-98<br>FAIL: b8-98> b7-98<br/>NOTE:<br>S-P is a low abundance fragmentation.<br>PASS: y3> y2<br/><br>No proline ions at b10-196<br/>                                                     |
| PhosphoTyrosine transition present     | 0/0          | 0 of 0 phosphotyrosine transitions were found.                                                                                                                                                                                                                                                                                                                                                                                                                                                                                          |
| Six of top ten ions identified         | 7/6          | ion 1 (mass: 526.258: intensity: 1303.95) assigned 1 times<br>ion 2 (mass: 477.381: intensity: 395.10) assigned 2 times<br>ion 3 (mass: 690.302: intensity: 161.17) assigned 1 times<br>ion 4 (mass: 380.291: intensity: 124.65) assigned 1 times<br>ion 5 (mass: 527.497: intensity: 119.07) assigned 0 times<br>ion 6 (mass: 512.793: intensity: 110.68) assigned 1 times<br>ion 7 (mass: 561.577: intensity: 99.67) assigned 2 times<br>ion 8 (mass: 616.609: intensity: 84.15) assigned 0 times<br>ion 9 (mass: 463.336: intensity: |

|   |   |                                                                                         |
|---|---|-----------------------------------------------------------------------------------------|
| - | - | 71.17) assigned 2 times<br>ion 10 (mass: 567.587: intensity:<br>68.57) assigned 0 times |
|---|---|-----------------------------------------------------------------------------------------|

## Ion Table

13 ions assigned of 23 ions above threshold (56%).

### N-terminal ions

| AA | N-ion | b                            | b*       | b-196   | b-98                         | bo       |
|----|-------|------------------------------|----------|---------|------------------------------|----------|
| A  | 1     | 72.044                       | 55.018   | -       | -                            | 54.034   |
| G  | 2     | 129.066                      | 112.039  | -       | -                            | 111.055  |
| A  | 3     | 200.103                      | 183.076  | -       | -                            | 182.092  |
| P  | 4     | 297.156                      | 280.129  | -       | -                            | 279.145  |
| P  | 5     | 394.209                      | 377.182  | -       | -                            | 376.198  |
| s  | 6     | 561.207<br>*561.577 (7)      | 544.180  | -       | 463.221<br>*463.336 (5)      | 543.196  |
| P  | 7     | 658.260<br>*329.413 [2+] (3) | 641.233  | -       | 560.274                      | 640.249  |
| P  | 8     | 755.312                      | 738.286  | -       | 657.327<br>*329.413 [2+] (3) | 737.302  |
| s  | 9     | 922.311                      | 905.284  | 726.339 | 824.325<br>824.064 (2)       | 904.300  |
| P  | 10    | 1019.364                     | 1002.337 | 823.392 | 921.378                      | 1001.353 |
| G  | 11    | 1076.385                     | 1059.358 | 880.413 | 978.399                      | 1058.374 |
| R  | 12    | -                            | -        | -       | -                            | -        |

### C-terminal ions

| AA | C-ion | y                                            | y*       | y-196                        | y-98                          | yo                     |
|----|-------|----------------------------------------------|----------|------------------------------|-------------------------------|------------------------|
| A  | 12    | -                                            | -        | -                            | -                             | -                      |
| G  | 11    | 1179.460                                     | 1162.433 | 983.488                      | 1081.474                      | 1161.449               |
| A  | 10    | 1122.438<br>*561.577 [2+] (7)                | 1105.412 | 926.466<br>*463.336 [2+] (5) | 1024.452<br>512.793 [2+] (8)  | 1104.428               |
| P  | 9     | 1051.401<br>526.258 [2+] (100)               | 1034.374 | 855.429<br>*428.198 [2+] (3) | 953.415<br>*477.381 [2+] (30) | 1033.390               |
| P  | 8     | 954.348<br>*477.381 [2+] (30)<br>954.383 (4) | 937.322  | 758.376                      | 856.362<br>*428.198 [2+] (3)  | 936.338                |
| s  | 7     | 857.295                                      | 840.269  | 661.324                      | 759.310<br>380.291 [2+] (9)   | 839.285                |
| P  | 6     | 690.297<br>690.302 (12)                      | 673.271  | -                            | 592.311                       | 672.287                |
| P  | 5     | 593.244                                      | 576.218  | -                            | 495.258                       | 575.234                |
| s  | 4     | 496.192                                      | 479.165  | -                            | 398.206                       | 478.181<br>478.318 (4) |
| P  | 3     | 329.193<br>*329.413 (3)                      | 312.167  | -                            | -                             | 311.183                |
| G  | 2     | 232.140                                      | 215.114  | -                            | -                             | 214.130                |
| R  | 1     | 175.119                                      | 158.092  | -                            | -                             | 157.108                |

## Ion distribution

| Threshold | Ion count | Matches | % matched |
|-----------|-----------|---------|-----------|
| 0         | 50        | 23      | 46        |
| 0.5       | 46        | 21      | 45        |
| 1         | 35        | 18      | 51        |
| 2         | 22        | 13      | 59        |
| 3         | 16        | 11      | 68        |
| 4         | 14        | 9       | 64        |
| 5         | 10        | 7       | 70        |
| 10        | 3         | 3       | 100       |

### Observed ions > 1%

| m/z     | Intensity            | % max | Assignment (delta)                               |
|---------|----------------------|-------|--------------------------------------------------|
| 256.306 | 20.40 <sub>5</sub>   | 1.56  |                                                  |
| 297.278 | 26.04 <sub>5</sub>   | 1.99  | y5[2+] (0.15) : b4 (0.12)                        |
| 313.876 | 19.69 <sub>5</sub>   | 1.51  | c4 (-0.30)                                       |
| 329.413 | 40.48 <sub>5</sub>   | 3.10  | b8-98[2+] (0.24) : y3 (0.21)<br>: b7[2+] (-0.22) |
| 377.727 | 19.00 <sub>5</sub>   | 1.45  | b8[2+] (-0.43)                                   |
| 380.291 | 124.65 <sub>5</sub>  | 9.55  | y7-98[2+] (0.13)                                 |
| 428.198 | 41.23 <sub>5</sub>   | 3.16  | y9-196[2+] (-0.02) :<br>y8-98[2+] (-0.48)        |
| 436.265 | 32.09 <sub>5</sub>   | 2.46  |                                                  |
| 463.336 | 71.17 <sub>5</sub>   | 5.45  | b6-98 (0.11) : y10-196[2+]<br>(-0.40)            |
| 464.239 | 36.35 <sub>5</sub>   | 2.78  |                                                  |
| 477.381 | 395.10 <sub>5</sub>  | 30.30 | y9-98[2+] (0.16) : y8[2+]<br>(-0.29)             |
| 478.318 | 56.87 <sub>5</sub>   | 4.36  | y4o (0.13)                                       |
| 512.793 | 110.68 <sub>5</sub>  | 8.48  | y10-98[2+] (0.06)                                |
| 526.258 | 1303.95 <sub>5</sub> | 100   | y9[2+] (0.05)                                    |
| 527.497 | 119.07 <sub>5</sub>  | 9.13  |                                                  |
| 528.172 | 57.50 <sub>5</sub>   | 4.40  |                                                  |
| 561.577 | 99.67 <sub>5</sub>   | 7.64  | b6 (0.36) : y10[2+] (-0.14)                      |
| 567.587 | 68.57 <sub>5</sub>   | 5.25  |                                                  |
| 607.610 | 30.91 <sub>5</sub>   | 2.37  |                                                  |
| 608.451 | 52.73 <sub>5</sub>   | 4.04  |                                                  |
| 609.260 | 36.63 <sub>5</sub>   | 2.80  |                                                  |
| 613.532 | 31.03 <sub>5</sub>   | 2.37  | a7* (0.29)                                       |
| 616.609 | 84.15 <sub>5</sub>   | 6.45  |                                                  |
| 690.302 | 161.17 <sub>5</sub>  | 12.36 | y6 (0.00)                                        |
| 743.845 | 20.62 <sub>5</sub>   | 1.58  |                                                  |
| 772.919 | 26.15 <sub>5</sub>   | 2.00  |                                                  |
| 788.925 | 22.29 <sub>5</sub>   | 1.70  |                                                  |
| 824.064 | 31.68 <sub>5</sub>   | 2.42  | b9-98 (-0.26)                                    |

|         |                    |      |             |
|---------|--------------------|------|-------------|
| 825.327 | 25.53 <sub>3</sub> | 1.95 |             |
| 839.413 | 25.79 <sub>3</sub> | 1.97 | y7o (0.12)  |
| 846.913 | 17.26 <sub>3</sub> | 1.32 |             |
| 898.609 | 14.64 <sub>3</sub> | 1.12 |             |
| 901.191 | 14.86 <sub>3</sub> | 1.13 |             |
| 954.383 | 59.24 <sub>3</sub> | 4.54 | y8 (0.03)   |
| 973.603 | 13.69 <sub>3</sub> | 1.04 | a10o (0.24) |



S650 or

S653

# ProPhosSI MS/MS report

Mass: 824.705949 Charge: 3+

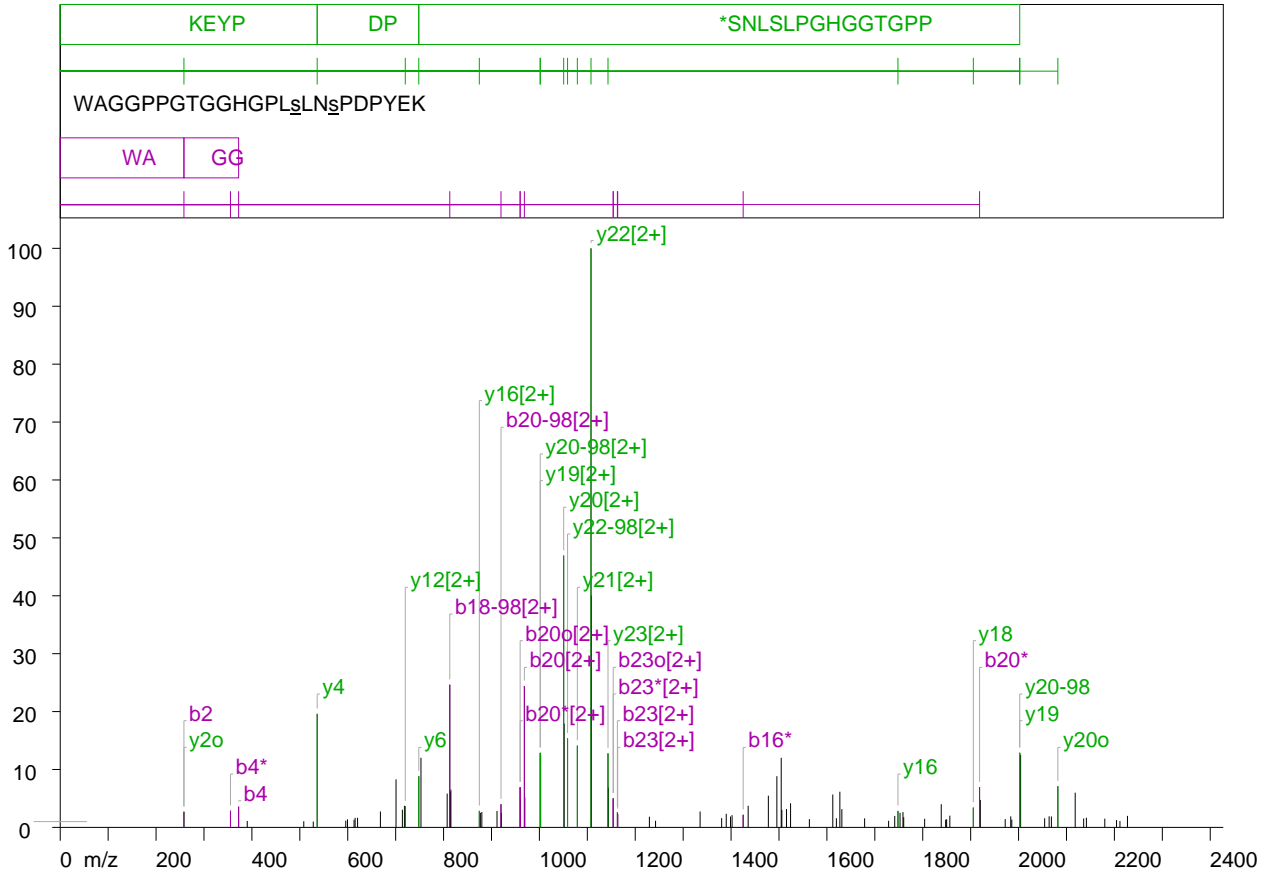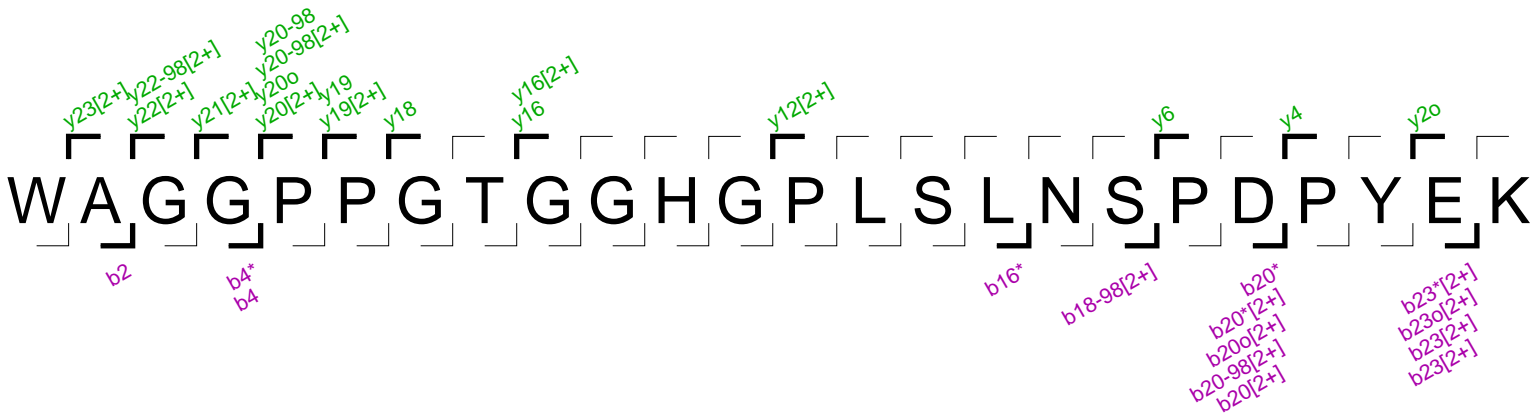

## Cav3.2 human

(25) 636 WAGGPPGTGGHGPL<sub>5</sub>LN<sub>5</sub>PDPYEK 659 2470.095 (0.9988) Da

|                         |     |
|-------------------------|-----|
| Parent Ion              | m/z |
| No parent ions observed |     |

### Modifications and supporting evidence

| Position | Residue ID   | Modification | Evidence                                                                                                   |
|----------|--------------|--------------|------------------------------------------------------------------------------------------------------------|
| 15 or 18 | (650 or 653) | Phospho (ST) | y4, y6 exclude phosphorylation at position 22; y12[2+], y16, y16[2+] exclude phosphorylation at position 8 |

### Spectrum interpretation

| Rule                                   | passed/tests | Description                                                                                                                                                                                                                                                                                                                                                                                                                                                                                                                                                                                                                                      |
|----------------------------------------|--------------|--------------------------------------------------------------------------------------------------------------------------------------------------------------------------------------------------------------------------------------------------------------------------------------------------------------------------------------------------------------------------------------------------------------------------------------------------------------------------------------------------------------------------------------------------------------------------------------------------------------------------------------------------|
| Parent ions present                    | 0/1          | Parent ions corresponding to the parent fragment - 1 phosphate ions were not found                                                                                                                                                                                                                                                                                                                                                                                                                                                                                                                                                               |
| Three -98 Ions present                 | 1/1          | 4 des-phospho fragment ions were found.                                                                                                                                                                                                                                                                                                                                                                                                                                                                                                                                                                                                          |
| Unique -98 transitions present         | 0/1          |                                                                                                                                                                                                                                                                                                                                                                                                                                                                                                                                                                                                                                                  |
| Four Sequential b or y ions            | 0/1          | Sequence of four y or b ions not observed                                                                                                                                                                                                                                                                                                                                                                                                                                                                                                                                                                                                        |
| Five of six sequential ions present    | 0/1          |                                                                                                                                                                                                                                                                                                                                                                                                                                                                                                                                                                                                                                                  |
| Proline directed fragmentation pattern | 6/6          | NOTE: G-P is a low abundance fragmentation.<br>PASS: y20-98> y19-98<br/><br>PASS: b5< b4<br/><br>NOTE: P-P is a low abundance fragmentation.<br>No proline ions at y19-98<br>No proline ions at b6<br/><br>NOTE: G-P is a low abundance fragmentation.<br>No proline ions at y12-98<br>No proline ions at b13<br/><br>NOTE: S-P is a low abundance fragmentation.<br>PASS: y6> y5<br/><br>PASS: b19-98< b18-98<br/><br>PASS: y4> y3<br/><br>PASS: b21-98< b20-98<br/>                                                                                                                                                                            |
| PhosphoTyrosine transition present     | 0/0          | 0 of 0 phosphotyrosine transitions were found.                                                                                                                                                                                                                                                                                                                                                                                                                                                                                                                                                                                                   |
| Six of top ten ions identified         | 8/6          | ion 1 (mass: 1107.714: intensity: 9054.44) assigned 1 times<br>ion 2 (mass: 1050.634: intensity: 4250.15) assigned 1 times<br>ion 3 (mass: 1108.550: intensity: 3624.89) assigned 0 times<br>ion 4 (mass: 812.990: intensity: 2231.96) assigned 1 times<br>ion 5 (mass: 968.646: intensity: 2211.32) assigned 1 times<br>ion 6 (mass: 536.276: intensity: 1775.64) assigned 1 times<br>ion 7 (mass: 1051.625: intensity: 1623.28) assigned 0 times<br>ion 8 (mass: 1058.773: intensity: 1391.55) assigned 1 times<br>ion 9 (mass: 1079.182: intensity: 1278.59) assigned 1 times<br>ion 10 (mass: 1001.712: intensity: 1166.19) assigned 2 times |

## Ion Table

28 ions assigned of 65 ions above threshold (43%).

N-terminal ions

| AA | N-ion | b                                                  | b*                                            | b-98                          | bo                             |
|----|-------|----------------------------------------------------|-----------------------------------------------|-------------------------------|--------------------------------|
| W  | 1     | 187.087                                            | 170.060                                       | -                             | 169.076                        |
| A  | 2     | 258.124<br>*258.162 (2)                            | 241.097                                       | -                             | 240.113                        |
| G  | 3     | 315.145                                            | 298.119                                       | -                             | 297.135                        |
| G  | 4     | 372.167<br>372.296 (3)                             | 355.140<br>355.295 (2)                        | -                             | 354.156                        |
| P  | 5     | 469.219                                            | 452.193                                       | -                             | 451.209                        |
| P  | 6     | 566.272                                            | 549.246                                       | -                             | 548.262                        |
| G  | 7     | 623.294                                            | 606.267                                       | -                             | 605.283                        |
| T  | 8     | 724.341                                            | 707.315                                       | -                             | 706.331                        |
| G  | 9     | 781.363                                            | 764.336                                       | -                             | 763.352                        |
| G  | 10    | 838.384                                            | 821.358                                       | -                             | 820.374                        |
| H  | 11    | 975.443                                            | 958.417                                       | -                             | 957.433                        |
| G  | 12    | 1032.465                                           | 1015.438                                      | -                             | 1014.454                       |
| P  | 13    | 1129.517                                           | 1112.491                                      | -                             | 1111.507                       |
| L  | 14    | 1242.602                                           | 1225.575                                      | -                             | 1224.591                       |
| S  | 15    | 1329.634                                           | 1312.607                                      | -                             | 1311.623                       |
| L  | 16    | 1442.718                                           | 1425.691<br>1425.264 (2)                      | -                             | 1424.707                       |
| N  | 17    | 1556.761                                           | 1539.734                                      | -                             | 1538.750                       |
| s  | 18    | 1723.759                                           | 1706.732                                      | 1625.773<br>812.990 [2+] (24) | 1705.748                       |
| P  | 19    | 1820.812                                           | 1803.785                                      | 1722.826                      | 1802.801                       |
| D  | 20    | 1935.839<br>968.646 [2+] (24)                      | 1918.812<br>1918.587 (6)<br>*959.797 [2+] (6) | 1837.853<br>*919.820 [2+] (4) | 1917.828<br>*959.797 [2+] (6)  |
| P  | 21    | 2032.891                                           | 2015.865                                      | 1934.906                      | 2014.881                       |
| Y  | 22    | 2195.955                                           | 2178.928                                      | 2097.969                      | 2177.944                       |
| E  | 23    | 2324.997<br>1163.425 [2+] (2)<br>1162.780 [2+] (2) | 2307.971<br>*1154.087 [2+] (5)                | 2227.011                      | 2306.987<br>*1154.087 [2+] (5) |
| K  | 24    | -                                                  | -                                             | -                             | -                              |

C-terminal ions

| AA | C-ion | y                                                 | y*       | y-98                                              | yo                       |
|----|-------|---------------------------------------------------|----------|---------------------------------------------------|--------------------------|
| W  | 24    | -                                                 | -        | -                                                 | -                        |
| A  | 23    | 2285.024<br>1143.149 [2+] (12)                    | 2267.997 | 2187.038                                          | 2267.013                 |
| G  | 22    | 2213.986<br>1107.714 [2+] (100)                   | 2196.960 | 2116.001<br>1058.773 [2+] (15)                    | 2195.976                 |
| G  | 21    | 2156.965<br>1079.182 [2+] (14)                    | 2139.938 | 2058.979                                          | 2138.954                 |
| P  | 20    | 2099.943<br>1050.634 [2+] (46)                    | 2082.917 | 2001.958<br>*1001.712 [2+] (12)<br>*2002.417 (12) | 2081.933<br>2081.996 (7) |
| P  | 19    | 2002.891<br>*1001.712 [2+] (12)<br>*2002.417 (12) | 1985.864 | 1904.905                                          | 1984.880                 |
| G  | 18    | 1905.838<br>1905.582 (3)                          | 1888.811 | 1807.852                                          | 1887.827                 |

|   |    |                                              |          |          |                         |
|---|----|----------------------------------------------|----------|----------|-------------------------|
| T | 17 | 1848.816                                     | 1831.790 | 1750.831 | 1830.806                |
| G | 16 | 1747.769<br>1748.256 (2)<br>874.632 [2+] (2) | 1730.742 | 1649.783 | 1729.758                |
| G | 15 | 1690.747                                     | 1673.721 | 1592.761 | 1672.737                |
| H | 14 | 1633.726                                     | 1616.699 | 1535.740 | 1615.715                |
| G | 13 | 1496.667                                     | 1479.640 | 1398.681 | 1478.656                |
| P | 12 | 1439.645<br>720.144 [2+] (3)                 | 1422.619 | 1341.660 | 1421.635                |
| L | 11 | 1342.593                                     | 1325.566 | 1244.607 | 1324.582                |
| S | 10 | 1229.509                                     | 1212.482 | 1131.523 | 1211.498                |
| L | 9  | 1142.477                                     | 1125.450 | 1044.491 | 1124.466                |
| N | 8  | 1029.393                                     | 1012.366 | 931.407  | 1011.382                |
| s | 7  | 915.350                                      | 898.323  | 817.364  | 897.339                 |
| P | 6  | 748.351<br>748.287 (8)                       | 731.325  | -        | 730.341                 |
| D | 5  | 651.299                                      | 634.272  | -        | 633.288                 |
| P | 4  | 536.272<br>536.276 (19)                      | 519.245  | -        | 518.261                 |
| Y | 3  | 439.219                                      | 422.192  | -        | 421.208                 |
| E | 2  | 276.155                                      | 259.129  | -        | 258.145<br>*258.162 (2) |
| K | 1  | 147.113                                      | 130.086  | -        | 129.102                 |

### Ion distribution

| Threshold | Ion count | Matches | % matched |
|-----------|-----------|---------|-----------|
| 0         | 120       | 51      | 42        |
| 0.5       | 120       | 51      | 42        |
| 1         | 97        | 39      | 40        |
| 2         | 65        | 28      | 43        |
| 3         | 46        | 21      | 45        |
| 4         | 35        | 17      | 48        |
| 5         | 32        | 16      | 50        |
| 10        | 16        | 11      | 68        |

### Observed ions > 1%

| m/z     | Intensity            | % max | Assignment (delta)                 |
|---------|----------------------|-------|------------------------------------|
| 258.162 | 244.45 <sub>,</sub>  | 2.69  | b2 (0.03) : y2o (0.01)             |
| 355.295 | 260.84 <sub>,</sub>  | 2.88  | b4* (0.15)                         |
| 372.296 | 324.09 <sub>,</sub>  | 3.57  | b4 (0.12)                          |
| 390.290 | 100.60 <sub>,</sub>  | 1.11  |                                    |
| 508.287 | 96.58 <sub>,</sub>   | 1.06  | b12*[2+] (0.06)                    |
| 536.276 | 1775.64 <sub>,</sub> | 19.61 | y4 (0.00)                          |
| 595.874 | 105.25 <sub>,</sub>  | 1.16  |                                    |
| 599.520 | 125.90 <sub>,</sub>  | 1.39  | a14*[2+] (0.22)                    |
| 613.162 | 118.92 <sub>,</sub>  | 1.31  | b14o[2+] (0.36) : b14*[2+] (-0.12) |

|          |                      |       |                                     |
|----------|----------------------|-------|-------------------------------------|
| 615.411  | 149.64 <sub>3</sub>  | 1.65  | y10[2+] (0.15)                      |
| 620.509  | 150.15 <sub>3</sub>  | 1.65  |                                     |
| 668.191  | 248.99 <sub>3</sub>  | 2.74  |                                     |
| 700.827  | 750.89 <sub>3</sub>  | 8.29  |                                     |
| 714.075  | 276.36 <sub>3</sub>  | 3.05  |                                     |
| 718.341  | 337.66 <sub>3</sub>  | 3.72  |                                     |
| 719.466  | 230.97 <sub>3</sub>  | 2.55  |                                     |
| 720.144  | 330.97 <sub>3</sub>  | 3.65  | y12[2+] (-0.18)                     |
| 748.287  | 800.47 <sub>3</sub>  | 8.84  | y6 (-0.06)                          |
| 752.826  | 1088.71 <sub>3</sub> | 12.02 |                                     |
| 807.483  | 528.54 <sub>3</sub>  | 5.83  |                                     |
| 812.990  | 2231.96 <sub>3</sub> | 24.65 | b18-98[2+] (-0.40)                  |
| 814.014  | 558.27 <sub>3</sub>  | 6.16  |                                     |
| 815.294  | 589.84 <sub>3</sub>  | 6.51  |                                     |
| 874.632  | 258.06 <sub>3</sub>  | 2.85  | y16[2+] (0.24)                      |
| 876.806  | 228.63 <sub>3</sub>  | 2.52  |                                     |
| 879.870  | 239.70 <sub>3</sub>  | 2.64  |                                     |
| 911.538  | 257.30 <sub>3</sub>  | 2.84  |                                     |
| 919.820  | 362.47 <sub>3</sub>  | 4.00  | c19[2+] (0.39) : b20-98[2+] (0.38)  |
| 920.668  | 226.70 <sub>3</sub>  | 2.50  |                                     |
| 959.797  | 628.94 <sub>3</sub>  | 6.94  | b20o[2+] (0.37) : b20*[2+] (-0.11)  |
| 960.582  | 429.60 <sub>3</sub>  | 4.74  |                                     |
| 968.646  | 2211.32 <sub>3</sub> | 24.42 | b20[2+] (0.22)                      |
| 969.540  | 468.52 <sub>3</sub>  | 5.17  |                                     |
| 1001.712 | 1166.19 <sub>3</sub> | 12.87 | y20-98[2+] (0.22) : y19[2+] (-0.23) |
| 1002.630 | 1133.38 <sub>3</sub> | 12.51 | a21[2+] (-0.32)                     |
| 1050.634 | 4250.15 <sub>3</sub> | 46.93 | y20[2+] (0.15)                      |
| 1051.625 | 1623.28 <sub>3</sub> | 17.92 |                                     |
| 1058.773 | 1391.55 <sub>3</sub> | 15.36 | y22-98[2+] (0.26)                   |
| 1079.182 | 1278.59 <sub>3</sub> | 14.12 | y21[2+] (0.19)                      |
| 1107.714 | 9054.44 <sub>3</sub> | 100   | y22[2+] (0.21)                      |
| 1108.550 | 3624.89 <sub>3</sub> | 40.03 |                                     |
| 1143.149 | 1157.60 <sub>3</sub> | 12.78 | y23[2+] (0.13)                      |
| 1144.015 | 622.73 <sub>3</sub>  | 6.87  |                                     |
| 1154.087 | 454.67 <sub>3</sub>  | 5.02  | b23o[2+] (0.08) : b23*[2+] (-0.40)  |
| 1162.780 | 234.13 <sub>3</sub>  | 2.58  | b23[2+] (-0.22)                     |
| 1163.425 | 208.43 <sub>3</sub>  | 2.30  | b23[2+] (0.42)                      |
| 1229.534 | 166.92 <sub>3</sub>  | 1.84  | y10 (0.02)                          |
| 1242.384 | 103.69 <sub>3</sub>  | 1.14  | b14 (-0.21)                         |
| 1335.374 | 248.99 <sub>3</sub>  | 2.74  |                                     |
| 1380.336 | 145.07 <sub>3</sub>  | 1.60  |                                     |

|          |                      |       |                             |
|----------|----------------------|-------|-----------------------------|
| 1389.905 | 212.82 <sub>3</sub>  | 2.35  |                             |
| 1398.850 | 169.53 <sub>3</sub>  | 1.87  | y13-98 (0.16)               |
| 1402.100 | 191.71 <sub>3</sub>  | 2.11  |                             |
| 1425.264 | 197.39 <sub>3</sub>  | 2.18  | b16* (-0.42)                |
| 1435.674 | 337.66 <sub>3</sub>  | 3.72  |                             |
| 1477.830 | 496.34 <sub>3</sub>  | 5.48  |                             |
| 1495.567 | 800.47 <sub>3</sub>  | 8.84  |                             |
| 1504.645 | 1088.71 <sub>3</sub> | 12.02 |                             |
| 1505.985 | 274.37 <sub>3</sub>  | 3.03  |                             |
| 1515.675 | 286.97 <sub>3</sub>  | 3.16  |                             |
| 1524.203 | 377.61 <sub>3</sub>  | 4.17  | x13 (-0.45)                 |
| 1563.430 | 129.17 <sub>3</sub>  | 1.42  |                             |
| 1612.314 | 514.23 <sub>3</sub>  | 5.67  |                             |
| 1619.799 | 143.37 <sub>3</sub>  | 1.58  |                             |
| 1627.020 | 558.27 <sub>3</sub>  | 6.16  |                             |
| 1631.211 | 285.74 <sub>3</sub>  | 3.15  |                             |
| 1678.718 | 141.37 <sub>3</sub>  | 1.56  | a18* (-0.01)                |
| 1728.781 | 102.80 <sub>3</sub>  | 1.13  |                             |
| 1741.568 | 179.54 <sub>3</sub>  | 1.98  |                             |
| 1748.256 | 258.06 <sub>3</sub>  | 2.85  | y16 (0.48)                  |
| 1752.605 | 228.63 <sub>3</sub>  | 2.52  |                             |
| 1758.733 | 239.70 <sub>3</sub>  | 2.64  |                             |
| 1760.280 | 158.73 <sub>3</sub>  | 1.75  |                             |
| 1803.983 | 134.49 <sub>3</sub>  | 1.48  | b19* (0.19)                 |
| 1838.633 | 362.47 <sub>3</sub>  | 4.00  |                             |
| 1847.802 | 120.24 <sub>3</sub>  | 1.32  |                             |
| 1849.875 | 127.21 <sub>3</sub>  | 1.40  |                             |
| 1856.544 | 183.42 <sub>3</sub>  | 2.02  |                             |
| 1905.582 | 309.69 <sub>3</sub>  | 3.42  | y18 (-0.25)                 |
| 1918.587 | 628.94 <sub>3</sub>  | 6.94  | b20* (-0.22)                |
| 1920.158 | 429.60 <sub>3</sub>  | 4.74  |                             |
| 1972.107 | 129.58 <sub>3</sub>  | 1.43  |                             |
| 1983.694 | 172.49 <sub>3</sub>  | 1.90  |                             |
| 1985.863 | 122.14 <sub>3</sub>  | 1.34  | y19* (-0.00) : z19 (-0.00)  |
| 2002.417 | 1166.19 <sub>3</sub> | 12.87 | y20-98 (0.45) : y19 (-0.47) |
| 2004.253 | 1133.38 <sub>3</sub> | 12.51 |                             |
| 2054.453 | 142.38 <sub>3</sub>  | 1.57  |                             |
| 2063.776 | 173.68 <sub>3</sub>  | 1.91  |                             |
| 2068.513 | 170.97 <sub>3</sub>  | 1.88  |                             |
| 2081.996 | 643.76 <sub>3</sub>  | 7.10  | y20o (0.06)                 |
| 2118.182 | 543.34 <sub>3</sub>  | 6.00  |                             |
| 2135.845 | 139.62 <sub>3</sub>  | 1.54  |                             |
| 2141.527 | 150.98 <sub>3</sub>  | 1.66  |                             |

|          |         |      |               |
|----------|---------|------|---------------|
| 2179.963 | 136.36, | 1.50 |               |
| 2204.460 | 113.87, | 1.25 |               |
| 2211.576 | 99.87,  | 1.10 |               |
| 2227.278 | 180.09  | 1.98 | b23-98 (0.26) |



S687

# ProPhosSI MS/MS report

Mass: 736.846865 Charge: 2+

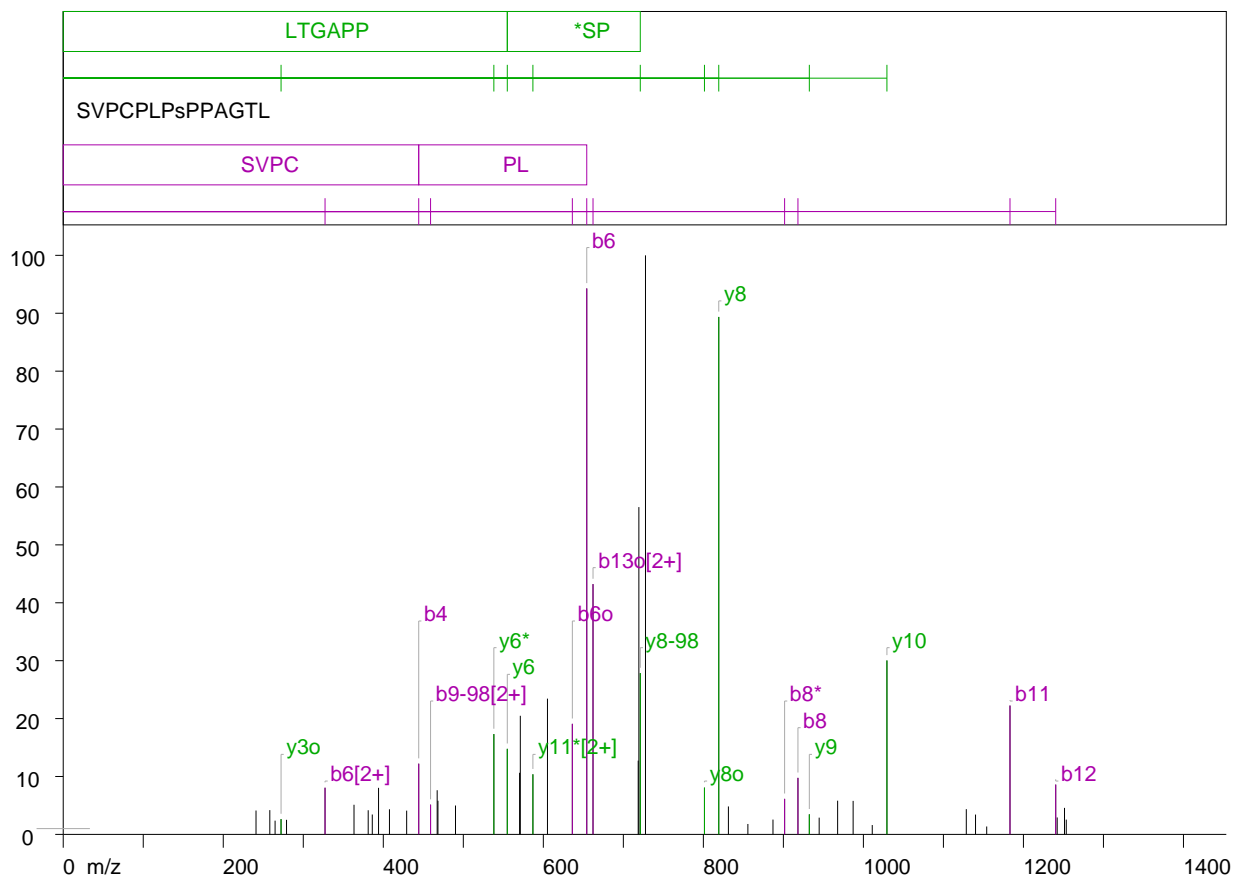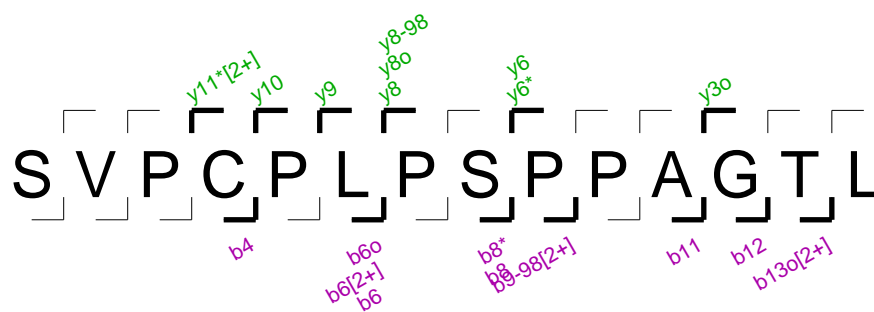

## Cav3.2 human

(20) 680 SVPCPLPsPPAGTL 693 1471.678 (-0.0001) Da

|                         |     |
|-------------------------|-----|
| Parent Ion              | m/z |
| No parent ions observed |     |

## Modifications and supporting evidence

| Position | Residue ID | Modification | Evidence                |
|----------|------------|--------------|-------------------------|
| 8        | (687)      | Phospho (ST) | b6=>b9-89; y6=>y8-98,y8 |

## Spectrum interpretation

| Rule                                   | passed/tests | Description                                                                                                                                                                                                                                                                                                                                                                                                                                                                                                                                                                                                                  |
|----------------------------------------|--------------|------------------------------------------------------------------------------------------------------------------------------------------------------------------------------------------------------------------------------------------------------------------------------------------------------------------------------------------------------------------------------------------------------------------------------------------------------------------------------------------------------------------------------------------------------------------------------------------------------------------------------|
| Parent ions present                    | 0/1          | Parent ions corresponding to the parent fragment - 1 phosphate ions were not found                                                                                                                                                                                                                                                                                                                                                                                                                                                                                                                                           |
| Three -98 Ions present                 | 0/1          | 2 des-phospho fragment ions were found.                                                                                                                                                                                                                                                                                                                                                                                                                                                                                                                                                                                      |
| Unique -98 transitions present         | 1/1          | transition b6 to b9-98,transition y6 to y8-98 support unique phosphorylation at position 8<br><br/>                                                                                                                                                                                                                                                                                                                                                                                                                                                                                                                          |
| Four Sequential b or y ions            | 0/1          | Sequence of four y or b ions not observed                                                                                                                                                                                                                                                                                                                                                                                                                                                                                                                                                                                    |
| Five of six sequential ions present    | 0/1          |                                                                                                                                                                                                                                                                                                                                                                                                                                                                                                                                                                                                                              |
| Proline directed fragmentation pattern | 5/6          | No proline ions at y12-98<br>No proline ions at b3<br/><br>No proline ions at y10-98<br>PASS: b5< b4<br/><br>PASS: y8-98> y7-98<br/><br>PASS: b7< b6<br/><br>NOTE: S-P is a low abundance fragmentation.<br>PASS: y6> y5<br/><br>FAIL: b9-98> b8-98<br/>NOTE:<br>P-P is a low abundance fragmentation.<br>No proline ions at y5<br>PASS: b10-98< b9-98<br/>                                                                                                                                                                                                                                                                  |
| PhosphoTyrosine transition present     | 0/0          | 0 of 0 phosphotyrosine transitions were found.                                                                                                                                                                                                                                                                                                                                                                                                                                                                                                                                                                               |
| Six of top ten ions identified         | 6/6          | ion 1 (mass: 727.661: intensity: 276.24) assigned 0 times<br>ion 2 (mass: 654.262: intensity: 260.45) assigned 1 times<br>ion 3 (mass: 819.233: intensity: 246.86) assigned 1 times<br>ion 4 (mass: 719.421: intensity: 156.14) assigned 0 times<br>ion 5 (mass: 662.101: intensity: 119.40) assigned 1 times<br>ion 6 (mass: 1029.410: intensity: 82.97) assigned 1 times<br>ion 7 (mass: 721.160: intensity: 76.94) assigned 1 times<br>ion 8 (mass: 605.171: intensity: 64.77) assigned 0 times<br>ion 9 (mass: 1183.207: intensity: 61.46) assigned 1 times<br>ion 10 (mass: 571.255: intensity: 56.59) assigned 0 times |

## Ion Table

21 ions assigned of 48 ions above threshold (43%).

### N-terminal ions

| AA | N-ion | b                                           | b*                     | b-98                        | bo                            |
|----|-------|---------------------------------------------|------------------------|-----------------------------|-------------------------------|
| S  | 1     | 88.039                                      | 71.013                 | -                           | 70.029                        |
| V  | 2     | 187.108                                     | 170.081                | -                           | 169.097                       |
| P  | 3     | 284.161                                     | 267.134                | -                           | 266.150                       |
| C  | 4     | 444.191<br>444.275 (12)                     | 427.165                | -                           | 426.181                       |
| P  | 5     | 541.244                                     | 524.217                | -                           | 523.233                       |
| L  | 6     | 654.328<br>327.199 [2+] (8)<br>654.262 (94) | 637.301                | -                           | 636.317<br>636.269 (19)       |
| P  | 7     | 751.381                                     | 734.354                | -                           | 733.370                       |
| s  | 8     | 918.379<br>918.220 (9)                      | 901.353<br>901.560 (6) | 820.393                     | 900.369                       |
| P  | 9     | 1015.432                                    | 998.405                | 917.446<br>459.057 [2+] (5) | 997.421                       |
| P  | 10    | 1112.485                                    | 1095.458               | 1014.499                    | 1094.474                      |
| A  | 11    | 1183.522<br>1183.207 (22)                   | 1166.495               | 1085.536                    | 1165.511                      |
| G  | 12    | 1240.543<br>1240.342 (8)                    | 1223.517               | 1142.557                    | 1222.533                      |
| T  | 13    | 1341.591                                    | 1324.564               | 1243.605                    | 1323.580<br>662.101 [2+] (43) |
| L  | 14    | -                                           | -                      | -                           | -                             |

### C-terminal ions

| AA | C-ion | y                         | y*                             | y-98                    | yo                     |
|----|-------|---------------------------|--------------------------------|-------------------------|------------------------|
| S  | 14    | -                         | -                              | -                       | -                      |
| V  | 13    | 1385.654                  | 1368.627                       | 1287.668                | 1367.643               |
| P  | 12    | 1286.585                  | 1269.559                       | 1188.599                | 1268.575               |
| C  | 11    | 1189.532                  | 1172.506<br>*586.970 [2+] (10) | 1091.546                | 1171.522               |
| P  | 10    | 1029.502<br>1029.410 (30) | 1012.475                       | 931.516                 | 1011.491               |
| L  | 9     | 932.449<br>932.436 (3)    | 915.422                        | 834.463                 | 914.438                |
| P  | 8     | 819.365<br>819.233 (89)   | 802.338                        | 721.379<br>721.160 (27) | 801.354<br>801.391 (8) |
| s  | 7     | 722.312                   | 705.286                        | 624.326                 | 704.302                |
| P  | 6     | 555.314<br>554.971 (14)   | 538.287<br>*538.163 (17)       | -                       | 537.303                |
| P  | 5     | 458.261                   | 441.234                        | -                       | 440.250                |
| A  | 4     | 361.208                   | 344.182                        | -                       | 343.198                |
| G  | 3     | 290.171                   | 273.145                        | -                       | 272.161<br>272.229 (2) |
| T  | 2     | 233.150                   | 216.123                        | -                       | 215.139                |
| L  | 1     | 132.102                   | 115.075                        | -                       | 114.091                |

### Ion distribution

| Threshold | Ion count | Matches | % matched |
|-----------|-----------|---------|-----------|
| 0         | 51        | 22      | 43        |
| 0.5       | 51        | 22      | 43        |
| 1         | 51        | 22      | 43        |
| 2         | 48        | 21      | 43        |
| 3         | 41        | 20      | 48        |
| 4         | 38        | 19      | 50        |
| 5         | 29        | 19      | 65        |
| 10        | 17        | 11      | 64        |

### Observed ions > 1%

| m/z     | Intensity           | % max | Assignment (delta)               |
|---------|---------------------|-------|----------------------------------|
| 240.936 | 11.39 <sub>,</sub>  | 4.12  |                                  |
| 258.158 | 11.58 <sub>,</sub>  | 4.19  |                                  |
| 264.766 | 6.56 <sub>,</sub>   | 2.37  |                                  |
| 272.229 | 7.29 <sub>,</sub>   | 2.63  | y3o (0.06)                       |
| 279.062 | 6.95 <sub>,</sub>   | 2.51  |                                  |
| 327.199 | 22.26 <sub>,</sub>  | 8.05  | b6[2+] (-0.46)                   |
| 363.406 | 14.14 <sub>,</sub>  | 5.11  |                                  |
| 381.135 | 11.52 <sub>,</sub>  | 4.17  |                                  |
| 386.251 | 9.49 <sub>,</sub>   | 3.43  |                                  |
| 394.085 | 22.21 <sub>,</sub>  | 8.04  |                                  |
| 407.704 | 11.98 <sub>,</sub>  | 4.33  |                                  |
| 429.200 | 11.34 <sub>,</sub>  | 4.10  |                                  |
| 444.275 | 33.73 <sub>,</sub>  | 12.21 | b4 (0.08)                        |
| 459.057 | 14.17 <sub>,</sub>  | 5.12  | b9-98[2+] (-0.17)                |
| 467.325 | 21.07 <sub>,</sub>  | 7.62  |                                  |
| 468.296 | 16.05 <sub>,</sub>  | 5.81  | c8[2+] (0.08)                    |
| 490.224 | 13.78 <sub>,</sub>  | 4.98  |                                  |
| 538.163 | 47.86 <sub>,</sub>  | 17.32 | z6 (-0.12) : y6* (-0.12)         |
| 554.971 | 40.82 <sub>,</sub>  | 14.77 | y6 (-0.34)                       |
| 570.344 | 29.39 <sub>,</sub>  | 10.63 |                                  |
| 571.255 | 56.59 <sub>,</sub>  | 20.48 |                                  |
| 586.970 | 28.67 <sub>,</sub>  | 10.37 | y11*[2+] (0.21) : z11[2+] (0.21) |
| 605.171 | 64.77 <sub>,</sub>  | 23.44 |                                  |
| 636.269 | 52.74 <sub>,</sub>  | 19.09 | b6o (-0.04)                      |
| 654.262 | 260.45 <sub>,</sub> | 94.28 | b6 (-0.06)                       |
| 662.101 | 119.40 <sub>,</sub> | 43.22 | b13o[2+] (-0.19)                 |
| 718.568 | 35.19 <sub>,</sub>  | 12.73 |                                  |
| 719.421 | 156.14 <sub>,</sub> | 56.52 |                                  |
| 721.160 | 76.94 <sub>,</sub>  | 27.85 | y8-98 (-0.21)                    |
| 727.661 | 276.24 <sub>,</sub> | 100   |                                  |

|          |                     |       |              |
|----------|---------------------|-------|--------------|
| 801.391  | 22.30 <sub>3</sub>  | 8.07  | y8o (0.03)   |
| 819.233  | 246.86 <sub>3</sub> | 89.36 | y8 (-0.13)   |
| 831.324  | 13.33 <sub>3</sub>  | 4.82  |              |
| 855.655  | 4.97 <sub>3</sub>   | 1.79  |              |
| 886.997  | 7.07 <sub>3</sub>   | 2.55  |              |
| 901.560  | 16.95 <sub>3</sub>  | 6.13  | b8* (0.20)   |
| 918.220  | 26.97 <sub>3</sub>  | 9.76  | b8 (-0.15)   |
| 932.436  | 9.57 <sub>3</sub>   | 3.46  | y9 (-0.01)   |
| 944.743  | 7.99 <sub>3</sub>   | 2.89  |              |
| 967.824  | 16.08 <sub>3</sub>  | 5.82  |              |
| 987.183  | 15.99 <sub>3</sub>  | 5.78  | a9 (-0.25)   |
| 1011.072 | 4.46 <sub>3</sub>   | 1.61  | y10o (-0.41) |
| 1029.410 | 82.97 <sub>3</sub>  | 30.03 | y10 (-0.09)  |
| 1128.598 | 12.04 <sub>3</sub>  | 4.35  |              |
| 1140.137 | 9.46 <sub>3</sub>   | 3.42  |              |
| 1154.104 | 3.77 <sub>3</sub>   | 1.36  |              |
| 1183.207 | 61.46 <sub>3</sub>  | 22.24 | b11 (-0.31)  |
| 1240.342 | 23.75 <sub>3</sub>  | 8.59  | b12 (-0.20)  |
| 1242.230 | 8.08 <sub>3</sub>   | 2.92  |              |
| 1251.336 | 12.65 <sub>3</sub>  | 4.57  |              |
| 1253.560 | 7.05                | 2.55  |              |

S715 and

S717

(diP)

# ProPhosSI MS/MS report

Mass: 1083.890985 Charge: 2+

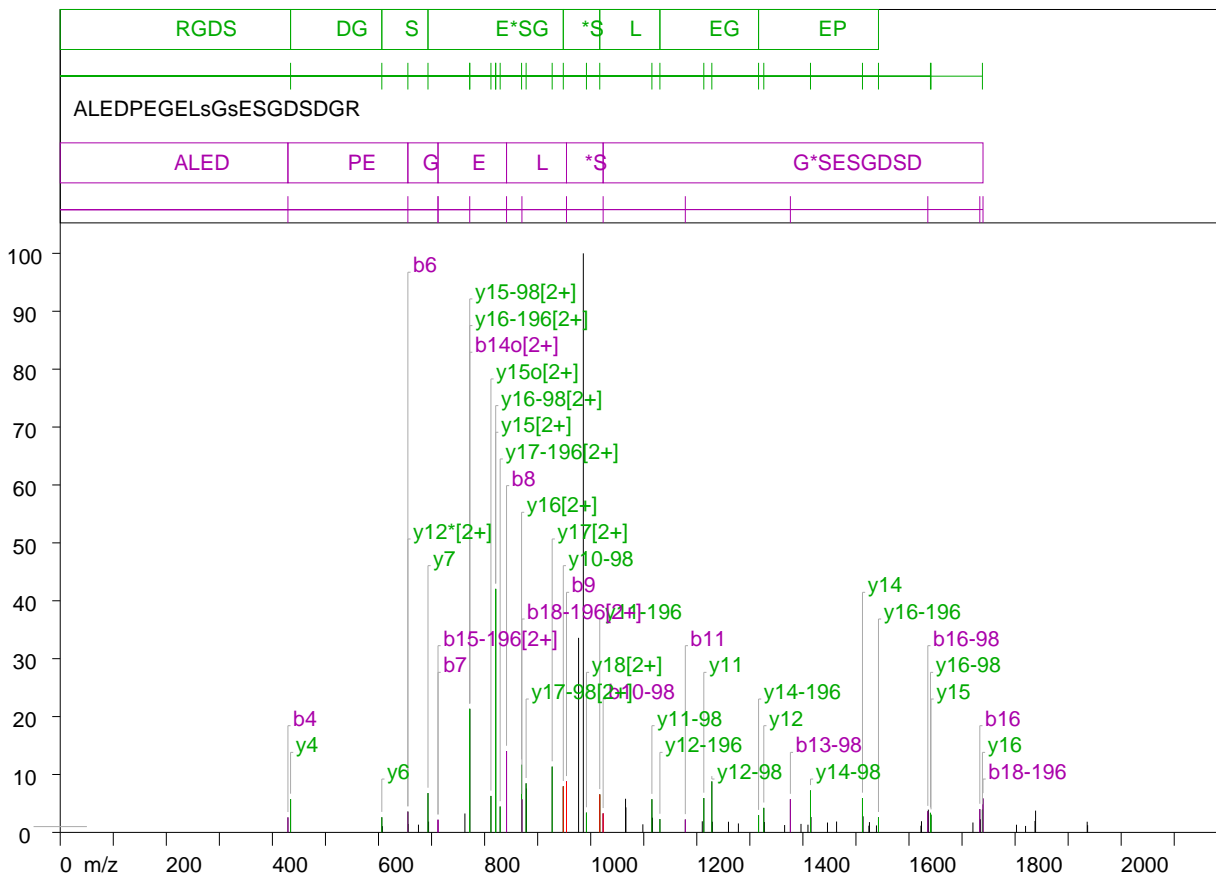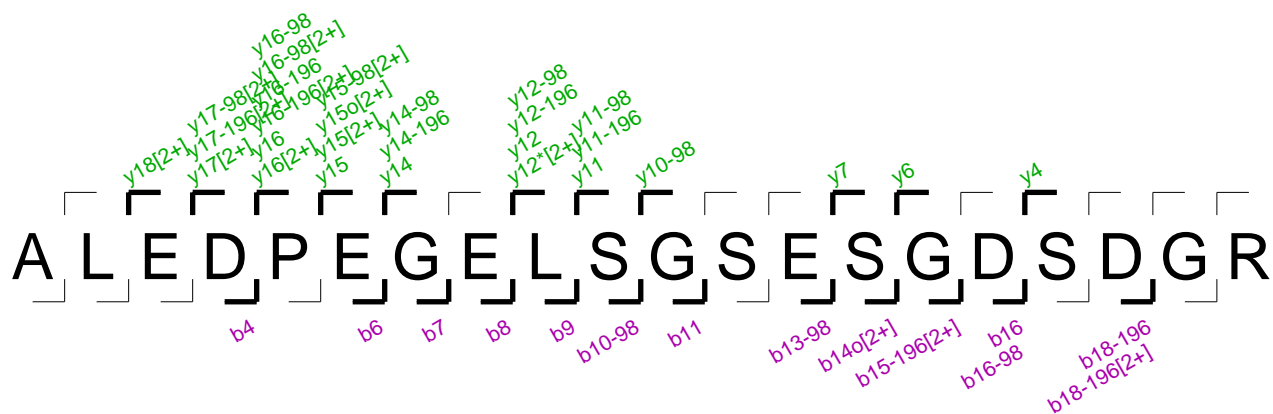



## Cav3.2 human

(69) 706 ALEDPEGELsGsESGSDSDGR 725 2165.767 (-0.0012) Da

|                         |     |
|-------------------------|-----|
| Parent Ion              | m/z |
| No parent ions observed |     |

## Modifications and supporting evidence

| Position | Residue ID | Modification | Evidence                            |
|----------|------------|--------------|-------------------------------------|
| 10       | (715)      | Phospho (ST) | b9 => b10-98 : y10-98<br>=> y11-196 |
| 12       | (717)      | Phospho (ST) | y7 to y10-98                        |

## Spectrum interpretation

| Rule                                   | passed/tests | Description                                                                                                                                                                                                                                                                                                                                                                                                                                                                                                                                                                                                                          |
|----------------------------------------|--------------|--------------------------------------------------------------------------------------------------------------------------------------------------------------------------------------------------------------------------------------------------------------------------------------------------------------------------------------------------------------------------------------------------------------------------------------------------------------------------------------------------------------------------------------------------------------------------------------------------------------------------------------|
| Parent ions present                    | 0/1          | Parent ions corresponding to the parent fragment - 2 phosphate ions were not found                                                                                                                                                                                                                                                                                                                                                                                                                                                                                                                                                   |
| Three -98 Ions present                 | 1/1          | 9 des-phospho fragment ions were found.                                                                                                                                                                                                                                                                                                                                                                                                                                                                                                                                                                                              |
| Unique -98 transitions present         | 2/2          | transition b9 to b10-98, transition y10-98 to y11-196 support unique phosphorylation at position 10<br><br/>transition y7 to y10-98 support unique phosphorylation at position 12<br><br/>                                                                                                                                                                                                                                                                                                                                                                                                                                           |
| Four Sequential b or y ions            | 1/1          | Sequence of four b ions found from b6 to b9.                                                                                                                                                                                                                                                                                                                                                                                                                                                                                                                                                                                         |
| Five of six sequential ions present    | 1/1          | Five of Six ions found between b4 and b9<br>Five of Six ions found between b5 and b10<br>Five of Six ions found between b6 and b11                                                                                                                                                                                                                                                                                                                                                                                                                                                                                                   |
| Proline directed fragmentation pattern | 2/2          | PASS: y16-196> y15-196<br/><br>PASS: b5< b4<br/>                                                                                                                                                                                                                                                                                                                                                                                                                                                                                                                                                                                     |
| PhosphoTyrosine transition present     | 0/0          | 0 of 0 phosphotyrosine transitions were found.                                                                                                                                                                                                                                                                                                                                                                                                                                                                                                                                                                                       |
| Six of top ten ions identified         | 9/6          | ion 1 (mass: 986.107: intensity: 5718.29) assigned 0 times<br>ion 2 (mass: 820.889: intensity: 2404.73) assigned 2 times<br>ion 3 (mass: 977.131: intensity: 1921.44) assigned 1 times<br>ion 4 (mass: 771.970: intensity: 1220.08) assigned 3 times<br>ion 5 (mass: 841.342: intensity: 802.68) assigned 1 times<br>ion 6 (mass: 869.695: intensity: 667.60) assigned 1 times<br>ion 7 (mass: 927.349: intensity: 649.70) assigned 1 times<br>ion 8 (mass: 954.368: intensity: 503.56) assigned 2 times<br>ion 9 (mass: 1228.353: intensity: 503.54) assigned 1 times<br>ion 10 (mass: 878.247: intensity: 484.62) assigned 1 times |

## Ion Table

38 ions assigned of 49 ions above threshold (77%).

### N-terminal ions

| AA | N-ion | b                        | b*       | b-196                                        | b-98                      | bo                                |
|----|-------|--------------------------|----------|----------------------------------------------|---------------------------|-----------------------------------|
| A  | 1     | 72.044                   | 55.018   | -                                            | -                         | 54.034                            |
| L  | 2     | 185.129                  | 168.102  | -                                            | -                         | 167.118                           |
| E  | 3     | 314.171                  | 297.145  | -                                            | -                         | 296.161                           |
| D  | 4     | 429.198<br>*429.218 (2)  | 412.172  | -                                            | -                         | 411.188                           |
| P  | 5     | 526.251                  | 509.224  | -                                            | -                         | 508.240                           |
| E  | 6     | 655.293<br>*655.354 (3)  | 638.267  | -                                            | -                         | 637.283                           |
| G  | 7     | 712.315<br>*712.153 (2)  | 695.288  | -                                            | -                         | 694.304                           |
| E  | 8     | 841.358<br>841.342 (14)  | 824.331  | -                                            | -                         | 823.347                           |
| L  | 9     | 954.442<br>*954.368 (8)  | 937.415  | -                                            | -                         | 936.431                           |
| s  | 10    | 1121.440                 | 1104.413 | -                                            | 1023.454<br>1023.457 (3)  | 1103.429                          |
| G  | 11    | 1178.461<br>1178.352 (2) | 1161.435 | -                                            | 1080.475                  | 1160.451                          |
| s  | 12    | 1345.460                 | 1328.433 | 1149.488                                     | 1247.474                  | 1327.449                          |
| E  | 13    | 1474.502                 | 1457.476 | 1278.531                                     | 1376.516<br>1376.418 (5)  | 1456.492                          |
| S  | 14    | 1561.534                 | 1544.508 | 1365.563                                     | 1463.548                  | 1543.524<br>*771.970 [2+]<br>(21) |
| G  | 15    | 1618.556                 | 1601.529 | 1422.584<br>*712.153 [2+] (2)                | 1520.570                  | 1600.545                          |
| D  | 16    | 1733.583<br>1733.520 (4) | 1716.556 | 1537.611                                     | 1635.597<br>*1635.517 (3) | 1715.572                          |
| S  | 17    | 1820.615                 | 1803.588 | 1624.643                                     | 1722.629                  | 1802.604                          |
| D  | 18    | 1935.642                 | 1918.615 | 1739.670<br>1739.512 (5)<br>870.349 [2+] (5) | 1837.656                  | 1917.631                          |
| G  | 19    | 1992.663                 | 1975.637 | 1796.691                                     | 1894.677                  | 1974.653                          |
| R  | 20    | -                        | -        | -                                            | -                         | -                                 |

### C-terminal ions

| AA | C-ion | y                                                 | y*       | y-196                                          | y-98                                              | yo                           |
|----|-------|---------------------------------------------------|----------|------------------------------------------------|---------------------------------------------------|------------------------------|
| A  | 20    | -                                                 | -        | -                                              | -                                                 | -                            |
| L  | 19    | 2095.738                                          | 2078.711 | 1899.766                                       | 1997.752                                          | 2077.727                     |
| E  | 18    | 1982.654<br>991.954 [2+] (3)                      | 1965.627 | 1786.682                                       | 1884.668                                          | 1964.643                     |
| D  | 17    | 1853.611<br>927.349 [2+] (11)                     | 1836.585 | 1657.639<br>829.302 [2+] (4)                   | 1755.625<br>878.247 [2+] (8)                      | 1835.601                     |
| P  | 16    | 1738.584<br>869.695 [2+] (11)<br>1738.407 (3)     | 1721.558 | 1542.612<br>*771.970 [2+] (21)<br>1542.499 (2) | 1640.598<br>*820.889 [2+]<br>(42)<br>1640.503 (3) | 1720.574                     |
| E  | 15    | 1641.531<br>1641.550 (3)<br>*820.889 [2+]<br>(42) | 1624.505 | 1445.560                                       | 1543.545<br>*771.970 [2+]<br>(21)                 | 1623.521<br>811.911 [2+] (6) |
| G  | 14    | 1512.489<br>1512.292 (5)                          | 1495.462 | 1316.517<br>1316.443 (2)                       | 1414.503<br>1414.327 (7)                          | 1494.478                     |

|   |    |                          |                               |                           |                          |          |
|---|----|--------------------------|-------------------------------|---------------------------|--------------------------|----------|
| E | 13 | 1455.467                 | 1438.441                      | 1259.496                  | 1357.481                 | 1437.457 |
| L | 12 | 1326.425<br>1326.273 (4) | 1309.398<br>*655.354 [2+] (3) | 1130.453<br>1130.418 (2)  | 1228.439<br>1228.353 (8) | 1308.414 |
| s | 11 | 1213.341<br>1213.199 (5) | 1196.314                      | 1017.369<br>*1017.065 (6) | 1115.355<br>1115.376 (5) | 1195.330 |
| G | 10 | 1046.342                 | 1029.316                      | -                         | 948.356<br>948.351 (7)   | 1028.332 |
| s | 9  | 989.321                  | 972.294                       | -                         | 891.335                  | 971.310  |
| E | 8  | 822.323                  | 805.296                       | -                         | -                        | 804.312  |
| S | 7  | 693.280<br>693.269 (6)   | 676.253                       | -                         | -                        | 675.269  |
| G | 6  | 606.248<br>606.239 (2)   | 589.221                       | -                         | -                        | 588.237  |
| D | 5  | 549.226                  | 532.200                       | -                         | -                        | 531.216  |
| S | 4  | 434.199<br>434.209 (5)   | 417.173                       | -                         | -                        | 416.189  |
| D | 3  | 347.167                  | 330.141                       | -                         | -                        | 329.157  |
| G | 2  | 232.140                  | 215.114                       | -                         | -                        | 214.130  |
| R | 1  | 175.119                  | 158.092                       | -                         | -                        | 157.108  |

### Ion distribution

| Threshold | Ion count | Matches | % matched |
|-----------|-----------|---------|-----------|
| 0         | 94        | 62      | 65        |
| 0.5       | 86        | 58      | 67        |
| 1         | 75        | 52      | 69        |
| 2         | 49        | 38      | 77        |
| 3         | 38        | 31      | 81        |
| 4         | 28        | 24      | 85        |
| 5         | 24        | 21      | 87        |
| 10        | 7         | 6       | 85        |

### Observed ions > 1%

| m/z     | Intensity            | % max | Assignment (delta)                           |
|---------|----------------------|-------|----------------------------------------------|
| 429.218 | 148.26 <sub>s</sub>  | 2.59  | b4 (0.01) : c8[2+] (-0.47)                   |
| 434.209 | 329.49 <sub>s</sub>  | 5.76  | y4 (0.00)                                    |
| 606.239 | 149.62 <sub>s</sub>  | 2.61  | y6 (-0.00)                                   |
| 607.297 | 61.56 <sub>s</sub>   | 1.07  | y11[2+] (0.12)                               |
| 655.354 | 205.08 <sub>s</sub>  | 3.58  | y12*[2+] (0.15) : z12[2+] (0.15) : b6 (0.06) |
| 656.146 | 83.28 <sub>s</sub>   | 1.45  |                                              |
| 675.321 | 76.36 <sub>s</sub>   | 1.33  | y7o (0.05)                                   |
| 693.269 | 388.26 <sub>s</sub>  | 6.78  | y7 (-0.01)                                   |
| 694.386 | 107.02 <sub>s</sub>  | 1.87  | b7o (0.08)                                   |
| 712.153 | 124.78 <sub>s</sub>  | 2.18  | b15-196[2+] (0.35) : b7 (-0.16)              |
| 762.869 | 186.68 <sub>s</sub>  | 3.26  |                                              |
| 771.970 | 1220.08 <sub>s</sub> | 21.33 | y16-196[2+] (0.15) : b14o[2+] (-0.29) :      |

|          |                      |       |                                     |
|----------|----------------------|-------|-------------------------------------|
| -        | -                    | -     | y15-98[2+] (-0.30)                  |
| 811.911  | 360.10 <sub>3</sub>  | 6.29  | y15o[2+] (-0.35)                    |
| 820.889  | 2404.73 <sub>3</sub> | 42.05 | y16-98[2+] (0.08) : y15[2+] (-0.38) |
| 829.302  | 255.44 <sub>3</sub>  | 4.46  | y17-196[2+] (-0.02)                 |
| 841.342  | 802.68 <sub>3</sub>  | 14.03 | b8 (-0.01)                          |
| 869.695  | 667.60 <sub>3</sub>  | 11.67 | y16[2+] (-0.10)                     |
| 870.349  | 326.83 <sub>3</sub>  | 5.71  | b18-196[2+] (0.00)                  |
| 878.247  | 484.62 <sub>3</sub>  | 8.47  | y17-98[2+] (-0.06)                  |
| 878.908  | 433.67 <sub>3</sub>  | 7.58  |                                     |
| 927.349  | 649.70 <sub>3</sub>  | 11.36 | y17[2+] (0.03)                      |
| 948.351  | 455.15 <sub>3</sub>  | 7.95  | y10-98 (-0.00)                      |
| 954.368  | 503.56 <sub>3</sub>  | 8.80  | a18[2+] (0.04) : b9 (-0.07)         |
| 977.131  | 1921.44 <sub>3</sub> | 33.60 | c18[2+] (0.29)                      |
| 986.107  | 5718.29 <sub>3</sub> | 100   |                                     |
| 991.954  | 195.30 <sub>3</sub>  | 3.41  | y18[2+] (0.12)                      |
| 1017.065 | 375.15 <sub>3</sub>  | 6.56  | x9 (-0.25) : y11-196 (-0.30)        |
| 1023.457 | 187.58 <sub>3</sub>  | 3.28  | b10-98 (0.00)                       |
| 1065.671 | 332.23 <sub>3</sub>  | 5.80  |                                     |
| 1066.329 | 247.22 <sub>3</sub>  | 4.32  |                                     |
| 1098.303 | 79.84 <sub>3</sub>   | 1.39  |                                     |
| 1115.376 | 327.75 <sub>3</sub>  | 5.73  | y11-98 (0.02)                       |
| 1116.363 | 145.25 <sub>3</sub>  | 2.54  |                                     |
| 1130.418 | 131.51 <sub>3</sub>  | 2.29  | y12-196 (-0.03)                     |
| 1178.352 | 127.77 <sub>3</sub>  | 2.23  | b11 (-0.10)                         |
| 1210.312 | 109.77 <sub>3</sub>  | 1.91  |                                     |
| 1213.199 | 339.22 <sub>3</sub>  | 5.93  | y11 (-0.14)                         |
| 1228.353 | 503.54 <sub>3</sub>  | 8.80  | y12-98 (-0.08)                      |
| 1229.269 | 105.38 <sub>3</sub>  | 1.84  |                                     |
| 1259.700 | 105.16 <sub>3</sub>  | 1.83  | y13-196 (0.20)                      |
| 1278.437 | 88.38 <sub>3</sub>   | 1.54  | b13-196 (-0.09)                     |
| 1316.443 | 169.55 <sub>3</sub>  | 2.96  | y14-196 (-0.07)                     |
| 1326.273 | 242.44 <sub>3</sub>  | 4.23  | y12 (-0.15)                         |
| 1327.368 | 102.47 <sub>3</sub>  | 1.79  | b12o (-0.08)                        |
| 1365.559 | 72.74 <sub>3</sub>   | 1.27  | b14-196 (-0.00)                     |
| 1376.418 | 328.29 <sub>3</sub>  | 5.74  | b13-98 (-0.09)                      |
| 1396.403 | 83.86 <sub>3</sub>   | 1.46  |                                     |
| 1409.553 | 76.08 <sub>3</sub>   | 1.33  |                                     |
| 1414.327 | 414.15 <sub>3</sub>  | 7.24  | y14-98 (-0.17)                      |
| 1415.340 | 151.64 <sub>3</sub>  | 2.65  |                                     |
| 1446.355 | 97.36 <sub>3</sub>   | 1.70  | a13 (-0.15)                         |
| 1463.496 | 107.40 <sub>3</sub>  | 1.87  | b14-98 (-0.05)                      |
| 1512.292 | 339.59 <sub>3</sub>  | 5.93  | y14 (-0.19)                         |

|          |                     |      |                              |
|----------|---------------------|------|------------------------------|
| 1513.464 | 158.71 <sub>3</sub> | 2.77 |                              |
| 1524.444 | 66.39 <sub>3</sub>  | 1.16 |                              |
| 1525.454 | 101.52 <sub>3</sub> | 1.77 |                              |
| 1538.644 | 68.84 <sub>3</sub>  | 1.20 |                              |
| 1542.499 | 149.03 <sub>3</sub> | 2.60 | y16-196 (-0.11)              |
| 1622.602 | 66.07 <sub>3</sub>  | 1.15 |                              |
| 1623.550 | 110.28 <sub>3</sub> | 1.92 | y15o (0.02)                  |
| 1635.517 | 209.15 <sub>3</sub> | 3.65 | c15 (-0.06) : b16-98 (-0.08) |
| 1636.468 | 224.75 <sub>3</sub> | 3.93 |                              |
| 1640.503 | 193.21 <sub>3</sub> | 3.37 | y16-98 (-0.09)               |
| 1641.550 | 174.73 <sub>3</sub> | 3.05 | y15 (0.01)                   |
| 1720.518 | 97.79 <sub>3</sub>  | 1.71 | y16o (-0.05)                 |
| 1733.520 | 230.04 <sub>3</sub> | 4.02 | b16 (-0.06)                  |
| 1734.456 | 129.81 <sub>3</sub> | 2.27 |                              |
| 1738.407 | 224.59 <sub>3</sub> | 3.92 | y16 (-0.17)                  |
| 1739.512 | 335.13 <sub>3</sub> | 5.86 | b18-196 (-0.15)              |
| 1802.617 | 75.69 <sub>3</sub>  | 1.32 | b17o (0.01)                  |
| 1819.742 | 63.79 <sub>3</sub>  | 1.11 |                              |
| 1837.554 | 113.19 <sub>3</sub> | 1.97 | c17 (-0.08) : b18-98 (-0.10) |
| 1838.647 | 214.98 <sub>3</sub> | 3.75 |                              |
| 1935.914 | 105.41 <sub>3</sub> | 1.84 | b18 (0.27)                   |
| 1936.738 | 71.26 <sub>3</sub>  | 1.24 |                              |

**S715**

# ProPhosSI MS/MS report

Mass: 598.739197 Charge: 2+

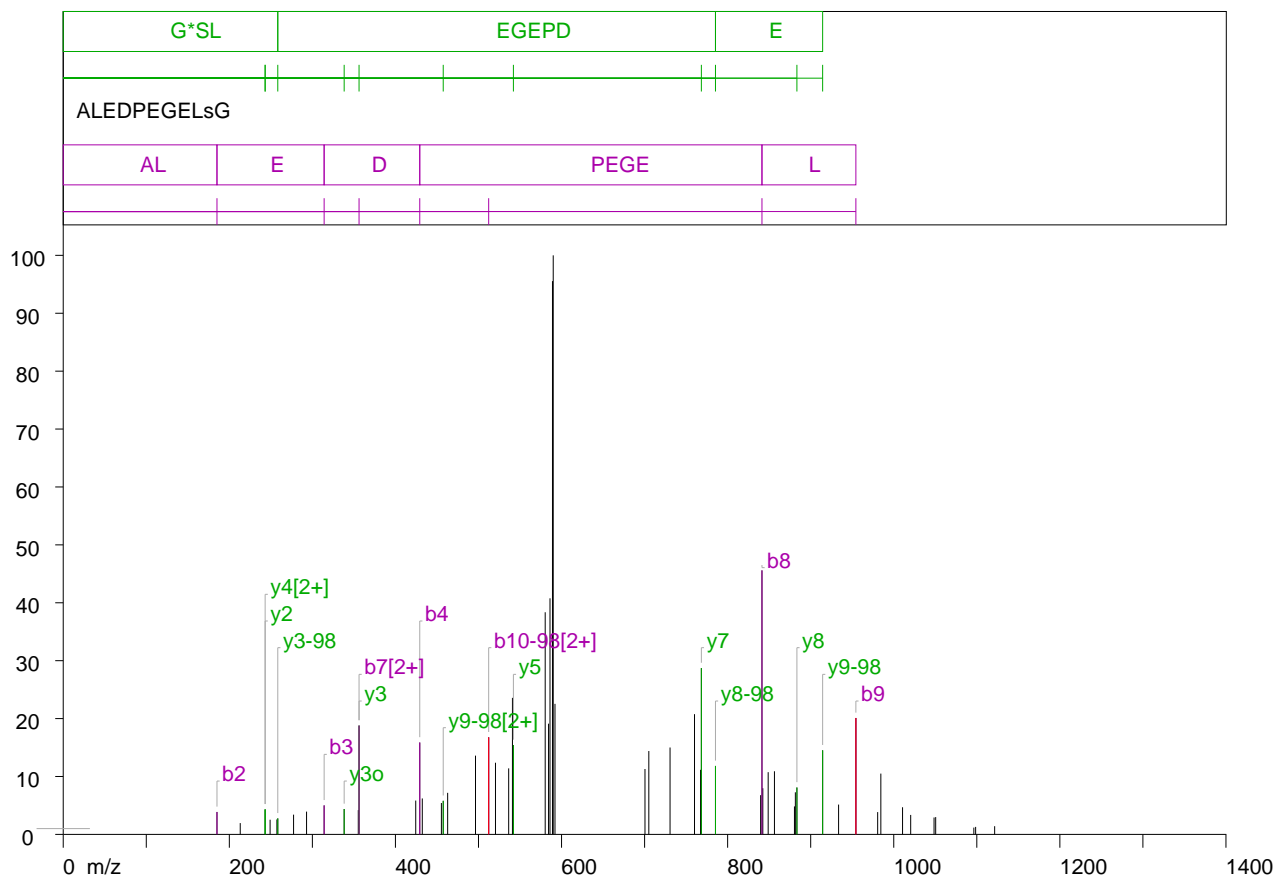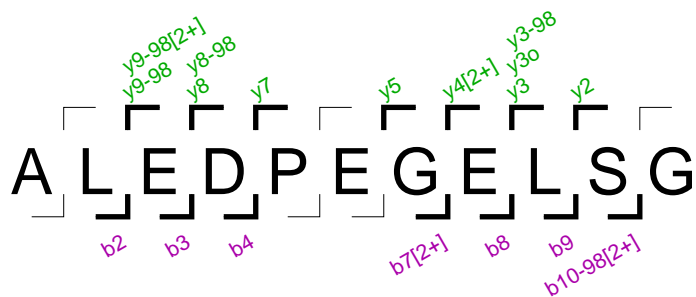

## Cav3.2 human

(43) 706 ALEDPEGELsG 716 1195.464 Da

|                         |     |
|-------------------------|-----|
| Parent Ion              | m/z |
| No parent ions observed |     |

## Modifications and supporting evidence

| Position | Residue ID | Modification | Evidence     |
|----------|------------|--------------|--------------|
| 10       | (715)      | Phospho (ST) | b9 => b10-98 |

## Spectrum interpretation

| Rule                                   | passed/tests | Description                                                                                                                                                                                                                                                                                                                                                                                                                                                                                                                                                                                                                          |
|----------------------------------------|--------------|--------------------------------------------------------------------------------------------------------------------------------------------------------------------------------------------------------------------------------------------------------------------------------------------------------------------------------------------------------------------------------------------------------------------------------------------------------------------------------------------------------------------------------------------------------------------------------------------------------------------------------------|
| Parent ions present                    | 0/1          | Parent ions corresponding to the parent fragment - 1 phosphate ions were not found                                                                                                                                                                                                                                                                                                                                                                                                                                                                                                                                                   |
| Three -98 Ions present                 | 1/1          | 4 des-phospho fragment ions were found.                                                                                                                                                                                                                                                                                                                                                                                                                                                                                                                                                                                              |
| Unique -98 transitions present         | 1/1          | transition b9 to b10-98 support unique phosphorylation at position 10<br><br/>                                                                                                                                                                                                                                                                                                                                                                                                                                                                                                                                                       |
| Four Sequential b or y ions            | 1/1          | Sequence of four b ions found from b7 to b10-98.                                                                                                                                                                                                                                                                                                                                                                                                                                                                                                                                                                                     |
| Five of six sequential ions present    | 0/1          |                                                                                                                                                                                                                                                                                                                                                                                                                                                                                                                                                                                                                                      |
| Proline directed fragmentation pattern | 1/1          | No proline ions at y7-98<br>PASS: b5< b4<br/>                                                                                                                                                                                                                                                                                                                                                                                                                                                                                                                                                                                        |
| PhosphoTyrosine transition present     | 0/0          | 0 of 0 phosphotyrosine transitions were found.                                                                                                                                                                                                                                                                                                                                                                                                                                                                                                                                                                                       |
| Six of top ten ions identified         | 3/6          | ion 1 (mass: 590.000: intensity: 2777.25) assigned 0 times<br>ion 2 (mass: 589.094: intensity: 2653.66) assigned 0 times<br>ion 3 (mass: 841.332: intensity: 1266.33) assigned 1 times<br>ion 4 (mass: 586.107: intensity: 1132.37) assigned 0 times<br>ion 5 (mass: 580.326: intensity: 1065.50) assigned 0 times<br>ion 6 (mass: 768.356: intensity: 797.61) assigned 1 times<br>ion 7 (mass: 540.885: intensity: 654.90) assigned 0 times<br>ion 8 (mass: 592.118: intensity: 626.15) assigned 0 times<br>ion 9 (mass: 760.089: intensity: 576.66) assigned 0 times<br>ion 10 (mass: 954.411: intensity: 558.37) assigned 1 times |

## Ion Table

19 ions assigned of 53 ions above threshold (35%).

### N-terminal ions

| AA | N-ion | b                       | b*      | b-98 | bo      |
|----|-------|-------------------------|---------|------|---------|
| A  | 1     | 72.044                  | 55.018  | -    | 54.034  |
| L  | 2     | 185.129<br>185.119 (3)  | 168.102 | -    | 167.118 |
| E  | 3     | 314.171<br>*314.166 (5) | 297.145 | -    | 296.161 |



|   |    |                               |          |                               |          |
|---|----|-------------------------------|----------|-------------------------------|----------|
| D | 4  | 429.198<br>*429.290 (15)      | 412.172  | -                             | 411.188  |
| P | 5  | 526.251                       | 509.224  | -                             | 508.240  |
| E | 6  | 655.293                       | 638.267  | -                             | 637.283  |
| G | 7  | 712.315<br>*356.198 [2+] (18) | 695.288  | -                             | 694.304  |
| E | 8  | 841.358<br>841.332 (45)       | 824.331  | -                             | 823.347  |
| L | 9  | 954.442<br>954.411 (20)       | 937.415  | -                             | 936.431  |
| s | 10 | 1121.440                      | 1104.413 | 1023.454<br>512.254 [2+] (16) | 1103.429 |
| G | 11 | -                             | -        | -                             | -        |

### C-terminal ions

| AA | C-ion | y                            | y*       | y-98                                        | yo                     |
|----|-------|------------------------------|----------|---------------------------------------------|------------------------|
| A  | 11    | -                            | -        | -                                           | -                      |
| L  | 10    | 1125.435                     | 1108.408 | 1027.449                                    | 1107.424               |
| E  | 9     | 1012.351                     | 995.324  | 914.365<br>914.380 (14)<br>457.555 [2+] (5) | 994.340                |
| D  | 8     | 883.308<br>883.377 (8)       | 866.282  | 785.322<br>785.358 (11)                     | 865.298                |
| P  | 7     | 768.281<br>768.356 (28)      | 751.255  | 670.295                                     | 750.271                |
| E  | 6     | 671.228                      | 654.202  | 573.243                                     | 653.218                |
| G  | 5     | 542.186<br>542.053 (15)      | 525.159  | 444.200                                     | 524.175                |
| E  | 4     | 485.164<br>*243.125 [2+] (4) | 468.138  | 387.178                                     | 467.154                |
| L  | 3     | 356.122<br>*356.198 (18)     | 339.095  | 258.136<br>258.337 (2)                      | 338.111<br>338.263 (4) |
| s  | 2     | 243.038<br>*243.125 (4)      | 226.011  | 145.052                                     | 225.027                |
| G  | 1     | 76.039                       | 59.013   | -                                           | 58.029                 |

### Ion distribution

| Threshold | Ion count | Matches | % matched |
|-----------|-----------|---------|-----------|
| 0         | 63        | 20      | 31        |
| 0.5       | 60        | 20      | 33        |
| 1         | 57        | 20      | 35        |
| 2         | 53        | 19      | 35        |
| 3         | 48        | 17      | 35        |
| 4         | 43        | 16      | 37        |
| 5         | 37        | 13      | 35        |
| 10        | 27        | 10      | 37        |

### Observed ions > 1%

| m/z     | Intensity | % max | Assignment (delta) |
|---------|-----------|-------|--------------------|
| 185.119 | 107.59    | 3.87  | b2 (-0.01)         |

|         |                      |       |                            |
|---------|----------------------|-------|----------------------------|
| 213.127 | 54.23 <sub>3</sub>   | 1.95  |                            |
| 243.125 | 120.00 <sub>3</sub>  | 4.32  | y2 (0.08) : y4[2+] (0.03)  |
| 249.096 | 70.40 <sub>3</sub>   | 2.53  |                            |
| 257.260 | 71.80 <sub>3</sub>   | 2.58  | x4[2+] (0.17)              |
| 258.337 | 76.80 <sub>3</sub>   | 2.76  | y3-98 (0.20)               |
| 277.361 | 94.73 <sub>3</sub>   | 3.41  |                            |
| 293.000 | 109.29 <sub>3</sub>  | 3.93  |                            |
| 314.166 | 139.11 <sub>3</sub>  | 5.00  | a6[2+] (0.01) : b3 (-0.00) |
| 338.263 | 121.72 <sub>3</sub>  | 4.38  | y3o (0.15)                 |
| 355.258 | 116.50 <sub>3</sub>  | 4.19  |                            |
| 356.198 | 522.05 <sub>3</sub>  | 18.79 | y3 (0.07) : b7[2+] (-0.46) |
| 424.426 | 162.31 <sub>3</sub>  | 5.84  |                            |
| 429.290 | 440.71 <sub>3</sub>  | 15.86 | b4 (0.09) : c8[2+] (-0.40) |
| 432.340 | 172.42 <sub>3</sub>  | 6.20  |                            |
| 455.319 | 150.49 <sub>3</sub>  | 5.41  | a9*[2+] (0.10)             |
| 457.555 | 161.09 <sub>3</sub>  | 5.80  | y9-98[2+] (-0.13)          |
| 462.891 | 199.34 <sub>3</sub>  | 7.17  |                            |
| 496.412 | 377.76 <sub>3</sub>  | 13.60 |                            |
| 512.254 | 465.66 <sub>3</sub>  | 16.76 | b10-98[2+] (0.02)          |
| 520.472 | 343.74 <sub>3</sub>  | 12.37 | x9[2+] (-0.20)             |
| 536.340 | 316.70 <sub>3</sub>  | 11.40 |                            |
| 540.885 | 654.90 <sub>3</sub>  | 23.58 |                            |
| 542.053 | 428.60 <sub>3</sub>  | 15.43 | y5 (-0.13)                 |
| 580.326 | 1065.50 <sub>3</sub> | 38.36 |                            |
| 584.363 | 531.01 <sub>3</sub>  | 19.11 |                            |
| 586.107 | 1132.37 <sub>3</sub> | 40.77 |                            |
| 589.094 | 2653.66 <sub>3</sub> | 95.54 |                            |
| 590.000 | 2777.25 <sub>3</sub> | 100   |                            |
| 592.118 | 626.15 <sub>3</sub>  | 22.54 |                            |
| 700.459 | 313.64 <sub>3</sub>  | 11.29 |                            |
| 705.098 | 399.84 <sub>3</sub>  | 14.39 |                            |
| 730.636 | 416.78 <sub>3</sub>  | 15.00 |                            |
| 760.089 | 576.66 <sub>3</sub>  | 20.76 |                            |
| 767.386 | 309.68 <sub>3</sub>  | 11.15 |                            |
| 768.356 | 797.61 <sub>3</sub>  | 28.71 | y7 (0.07)                  |
| 785.358 | 328.36 <sub>3</sub>  | 11.82 | y8-98 (0.03)               |
| 839.730 | 188.12 <sub>3</sub>  | 6.77  |                            |
| 841.332 | 1266.33 <sub>3</sub> | 45.59 | b8 (-0.02)                 |
| 842.363 | 221.44 <sub>3</sub>  | 7.97  |                            |
| 848.808 | 298.41 <sub>3</sub>  | 10.74 |                            |
| 856.351 | 302.82 <sub>3</sub>  | 10.90 |                            |
| 880.442 | 134.25 <sub>3</sub>  | 4.83  |                            |
| 881.535 | 201.96 <sub>3</sub>  | 7.27  |                            |

|          |         |       |              |
|----------|---------|-------|--------------|
| 883.377  | 224.93, | 8.09  | y8 (0.06)    |
| 914.380  | 403.34, | 14.52 | y9-98 (0.01) |
| 933.601  | 143.05, | 5.15  |              |
| 954.411  | 558.37, | 20.10 | b9 (-0.03)   |
| 980.641  | 106.97, | 3.85  |              |
| 984.451  | 291.63, | 10.50 |              |
| 1010.597 | 130.17, | 4.68  |              |
| 1020.386 | 93.40,  | 3.36  |              |
| 1048.534 | 81.03,  | 2.91  |              |
| 1050.473 | 83.02,  | 2.98  |              |
| 1096.439 | 32.68,  | 1.17  |              |
| 1098.580 | 36.00,  | 1.29  |              |
| 1121.489 | 39.36,  | 1.41  | b10 (0.04)   |

T749 or  
T751 and  
S758  
(diP)

# ProPhosSI MS/MS report

Mass: 749.291151 Charge: 2+

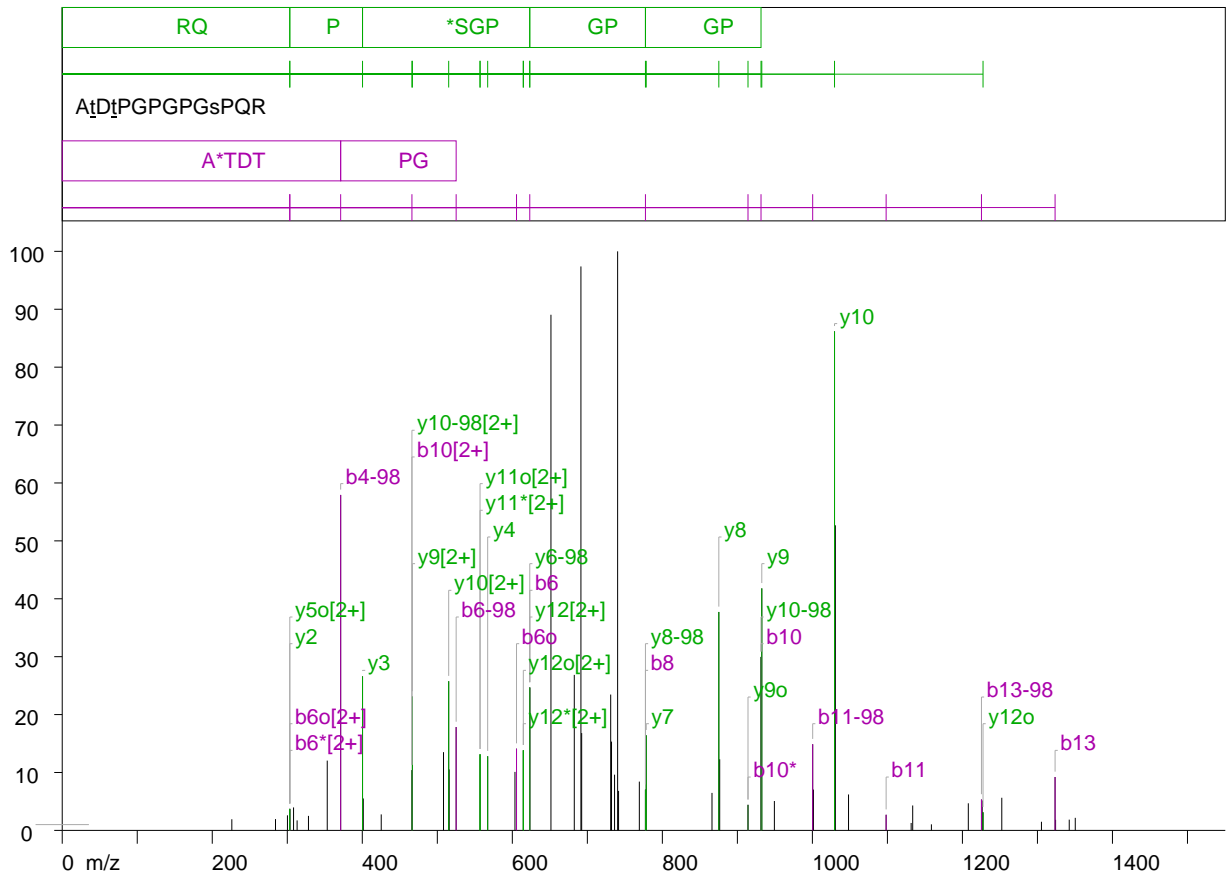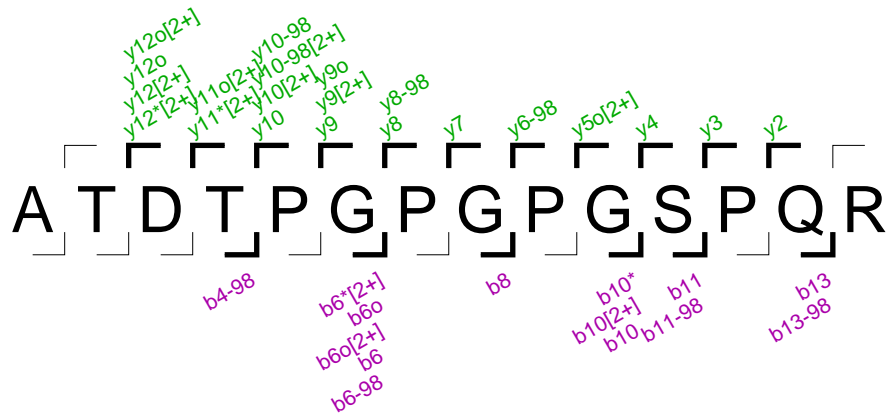

## Cav3.2 human

(33) 748 A†D†PGPGPGsPQR 761 1496.569 (-0.0031) Da

|                         |     |
|-------------------------|-----|
| Parent Ion              | m/z |
| No parent ions observed |     |

### Modifications and supporting evidence

| Position | Residue ID     | Modification | Evidence      |
|----------|----------------|--------------|---------------|
| 11       | (758)          | Phospho (ST) | b11-98 ,b4-98 |
| 2 or 4   | (749) or (751) | Phospho (ST) |               |

### Spectrum interpretation

| Rule                                   | passed/tests | Description                                                                                                                                                                                                                                                                                                                                                                                                                                                                                                                                                                                                                    |
|----------------------------------------|--------------|--------------------------------------------------------------------------------------------------------------------------------------------------------------------------------------------------------------------------------------------------------------------------------------------------------------------------------------------------------------------------------------------------------------------------------------------------------------------------------------------------------------------------------------------------------------------------------------------------------------------------------|
| Parent ions present                    | 0/1          | Parent ions corresponding to the parent fragment - 2 phosphate ions were not found                                                                                                                                                                                                                                                                                                                                                                                                                                                                                                                                             |
| Three -98 Ions present                 | 1/1          | 5 des-phospho fragment ions were found.                                                                                                                                                                                                                                                                                                                                                                                                                                                                                                                                                                                        |
| Unique -98 transitions present         | 1/2          | transition y3 to y6-98 support unique phosphorylation at position 11<br><br/>No transitions found to support unique phosphorylation at position 2 or 4<br><br/>                                                                                                                                                                                                                                                                                                                                                                                                                                                                |
| Four Sequential b or y ions            | 0/1          | Sequence of four y or b ions not observed                                                                                                                                                                                                                                                                                                                                                                                                                                                                                                                                                                                      |
| Five of six sequential ions present    | 0/1          |                                                                                                                                                                                                                                                                                                                                                                                                                                                                                                                                                                                                                                |
| Proline directed fragmentation pattern | 6/6          | PASS: y10-98> y9-98<br/><br>PASS: b5-98< b4-98<br/><br>NOTE: G-P is a low abundance fragmentation.<br>PASS: y8-98> y7-98<br/><br>PASS: b7-98< b6-98<br/><br>NOTE: G-P is a low abundance fragmentation.<br>PASS: y6-98> y5-98<br/><br>No proline ions at b9-98<br/><br>NOTE: S-P is a low abundance fragmentation.<br>PASS: y3> y2 with ratio 7.15<br/><br>No proline ions at b12-196<br/>                                                                                                                                                                                                                                     |
| PhosphoTyrosine transition present     | 0/0          | 0 of 0 phosphotyrosine transitions were found.                                                                                                                                                                                                                                                                                                                                                                                                                                                                                                                                                                                 |
| Six of top ten ions identified         | 5/6          | ion 1 (mass: 740.369: intensity: 258.13) assigned 0 times<br>ion 2 (mass: 691.430: intensity: 251.40) assigned 0 times<br>ion 3 (mass: 651.467: intensity: 229.87) assigned 0 times<br>ion 4 (mass: 1029.495: intensity: 222.46) assigned 1 times<br>ion 5 (mass: 371.177: intensity: 149.54) assigned 1 times<br>ion 6 (mass: 1030.605: intensity: 136.01) assigned 0 times<br>ion 7 (mass: 932.536: intensity: 107.89) assigned 1 times<br>ion 8 (mass: 875.259: intensity: 97.38) assigned 1 times<br>ion 9 (mass: 931.523: intensity: 77.33) assigned 2 times<br>ion 10 (mass: 682.597: intensity: 69.32) assigned 0 times |

## Ion Table

27 ions assigned of 54 ions above threshold (50%).

### N-terminal ions

| AA | N-ion | b                                              | b*                           | b-196    | b-98                      | bo                                           |
|----|-------|------------------------------------------------|------------------------------|----------|---------------------------|----------------------------------------------|
| A  | 1     | 72.044                                         | 55.018                       | -        | -                         | 54.034                                       |
| t  | 2     | 253.058                                        | 236.032                      | -        | 155.073                   | 235.048                                      |
| D  | 3     | 368.085                                        | 351.059                      | -        | 270.099                   | 350.075                                      |
| T  | 4     | 469.133                                        | 452.107                      | -        | 371.147<br>371.177 (57)   | 451.122                                      |
| P  | 5     | 566.186                                        | 549.159                      | -        | 468.200                   | 548.175                                      |
| G  | 6     | 623.207<br>*623.264 (24)                       | 606.181<br>*303.365 [2+] (3) | -        | 525.221<br>525.116 (17)   | 605.197<br>605.581 (14)<br>*303.365 [2+] (3) |
| P  | 7     | 720.260                                        | 703.234                      | -        | 622.274                   | 702.250                                      |
| G  | 8     | 777.282<br>*777.472 (7)                        | 760.255                      | -        | 679.296                   | 759.271                                      |
| P  | 9     | 874.334                                        | 857.308                      | -        | 776.348                   | 856.324                                      |
| G  | 10    | 931.356<br>*466.176 [2+] (10)<br>*931.523 (29) | 914.329<br>*914.149 (4)      | -        | 833.370                   | 913.345                                      |
| s  | 11    | 1098.354<br>1098.305 (2)                       | 1081.328                     | 902.382  | 1000.368<br>1000.383 (14) | 1080.344                                     |
| P  | 12    | 1195.407                                       | 1178.380                     | 999.435  | 1097.421                  | 1177.396                                     |
| Q  | 13    | 1323.465<br>1323.520 (9)                       | 1306.439                     | 1127.494 | 1225.480<br>1225.367 (5)  | 1305.455                                     |
| R  | 14    | -                                              | -                            | -        | -                         | -                                            |

### C-terminal ions

| AA | C-ion | y                                              | y*                             | y-196    | y-98                                           | yo                                             |
|----|-------|------------------------------------------------|--------------------------------|----------|------------------------------------------------|------------------------------------------------|
| A  | 14    | -                                              | -                              | -        | -                                              | -                                              |
| t  | 13    | 1426.540                                       | 1409.513                       | 1230.568 | 1328.554                                       | 1408.529                                       |
| D  | 12    | 1245.526<br>*623.264 [2+] (24)                 | 1228.499<br>*614.654 [2+] (13) | -        | 1147.540                                       | 1227.515<br>1227.479 (3)<br>*614.654 [2+] (13) |
| T  | 11    | 1130.499                                       | 1113.473<br>*556.970 [2+] (13) | -        | 1032.513                                       | 1112.489<br>*556.970 [2+] (13)                 |
| P  | 10    | 1029.451<br>1029.495 (86)<br>515.154 [2+] (25) | 1012.425                       | -        | 931.466<br>*466.176 [2+] (10)<br>*931.523 (29) | 1011.441                                       |
| G  | 9     | 932.399<br>932.536 (41)<br>466.782 [2+] (23)   | 915.372                        | -        | 834.413                                        | 914.388<br>*914.149 (4)                        |
| P  | 8     | 875.377<br>875.259 (37)                        | 858.351                        | -        | 777.391<br>*777.472 (7)                        | 857.367                                        |
| G  | 7     | 778.324<br>778.495 (16)                        | 761.298                        | -        | 680.338                                        | 760.314                                        |
| P  | 6     | 721.303                                        | 704.276                        | -        | 623.317<br>*623.264 (24)                       | 703.292                                        |
| G  | 5     | 624.250                                        | 607.224                        | -        | 526.264                                        | 606.240<br>*303.365 [2+] (3)                   |
| s  | 4     | 567.229<br>567.128 (12)                        | 550.202                        | -        | 469.243                                        | 549.218                                        |
| P  | 3     | 400.230<br>400.301 (26)                        | 383.204                        | -        | -                                              | 382.220                                        |

|   |   |                         |         |   |   |         |
|---|---|-------------------------|---------|---|---|---------|
| Q | 2 | 303.178<br>*303.365 (3) | 286.151 | - | - | 285.167 |
| R | 1 | 175.119                 | 158.092 | - | - | 157.108 |

### Ion distribution

| Threshold | Ion count | Matches | % matched |
|-----------|-----------|---------|-----------|
| 0         | 62        | 32      | 51        |
| 0.5       | 62        | 32      | 51        |
| 1         | 62        | 32      | 51        |
| 2         | 54        | 27      | 50        |
| 3         | 49        | 26      | 53        |
| 4         | 46        | 24      | 52        |
| 5         | 43        | 23      | 53        |
| 10        | 30        | 20      | 66        |

### Observed ions > 1%

| m/z     | Intensity           | % max | Assignment (delta)                                             |
|---------|---------------------|-------|----------------------------------------------------------------|
| 226.087 | 4.97 <sub>,</sub>   | 1.92  | b4o[2+] (0.02) : b4*[2+] (-0.47)                               |
| 284.291 | 5.04 <sub>,</sub>   | 1.95  | y4[2+] (0.17)                                                  |
| 300.227 | 6.72 <sub>,</sub>   | 2.60  |                                                                |
| 303.365 | 9.59 <sub>,</sub>   | 3.71  | b6o[2+] (0.26) : y2 (0.18) : b6*[2+] (-0.22) : y5o[2+] (-0.25) |
| 308.378 | 10.24 <sub>,</sub>  | 3.96  |                                                                |
| 313.100 | 4.46 <sub>,</sub>   | 1.72  | y5[2+] (0.47)                                                  |
| 328.256 | 6.47 <sub>,</sub>   | 2.50  |                                                                |
| 353.278 | 31.11 <sub>,</sub>  | 12.05 |                                                                |
| 371.177 | 149.54 <sub>,</sub> | 57.93 | b4-98 (0.02)                                                   |
| 400.301 | 68.66 <sub>,</sub>  | 26.59 | y3 (0.07)                                                      |
| 401.319 | 14.23 <sub>,</sub>  | 5.51  |                                                                |
| 425.244 | 7.13 <sub>,</sub>   | 2.76  |                                                                |
| 466.176 | 26.84 <sub>,</sub>  | 10.39 | b10[2+] (-0.00) : y10-98[2+] (-0.06)                           |
| 466.782 | 59.67 <sub>,</sub>  | 23.11 | y9[2+] (0.07)                                                  |
| 508.262 | 34.88 <sub>,</sub>  | 13.51 |                                                                |
| 515.154 | 66.50 <sub>,</sub>  | 25.76 | y10[2+] (-0.07)                                                |
| 515.768 | 27.19 <sub>,</sub>  | 10.53 |                                                                |
| 525.116 | 46.07 <sub>,</sub>  | 17.84 | b6-98 (-0.10)                                                  |
| 556.970 | 33.92 <sub>,</sub>  | 13.14 | y11o[2+] (0.22) : y11*[2+] (-0.27) : z11[2+] (-0.27)           |
| 567.128 | 33.06 <sub>,</sub>  | 12.80 | y4 (-0.10)                                                     |
| 603.504 | 26.08 <sub>,</sub>  | 10.10 |                                                                |
| 605.581 | 36.42 <sub>,</sub>  | 14.10 | b6o (0.38)                                                     |
| 614.654 | 35.73 <sub>,</sub>  | 13.84 | y12o[2+] (0.39) : y12*[2+] (-0.09) : z12[2+] (-0.09)           |



|          |                     |       |                                             |
|----------|---------------------|-------|---------------------------------------------|
| 623.264  | 63.69 <sub>,</sub>  | 24.67 | b6 (0.05) : y12[2+] (-0.00) : y6-98 (-0.05) |
| 651.467  | 229.87 <sub>,</sub> | 89.05 |                                             |
| 682.597  | 69.32 <sub>,</sub>  | 26.85 |                                             |
| 691.430  | 251.40 <sub>,</sub> | 97.39 |                                             |
| 692.428  | 43.39 <sub>,</sub>  | 16.80 | a7 (0.16)                                   |
| 731.116  | 60.56 <sub>,</sub>  | 23.46 | a8o (-0.16)                                 |
| 732.221  | 39.58 <sub>,</sub>  | 15.33 | a8* (-0.03)                                 |
| 736.268  | 24.84 <sub>,</sub>  | 9.62  |                                             |
| 740.369  | 258.13 <sub>,</sub> | 100   |                                             |
| 741.612  | 17.61 <sub>,</sub>  | 6.82  |                                             |
| 769.308  | 21.75 <sub>,</sub>  | 8.42  |                                             |
| 777.472  | 18.16 <sub>,</sub>  | 7.03  | b8 (0.18) : y8-98 (0.08)                    |
| 778.495  | 42.39 <sub>,</sub>  | 16.42 | y7 (0.17)                                   |
| 866.155  | 16.72 <sub>,</sub>  | 6.47  |                                             |
| 875.259  | 97.38 <sub>,</sub>  | 37.72 | y8 (-0.11)                                  |
| 876.444  | 31.70 <sub>,</sub>  | 12.28 |                                             |
| 914.149  | 11.39 <sub>,</sub>  | 4.41  | b10* (-0.18) : y9o (-0.23)                  |
| 931.523  | 77.33 <sub>,</sub>  | 29.95 | b10 (0.16) : y10-98 (0.05)                  |
| 932.536  | 107.89 <sub>,</sub> | 41.79 | y9 (0.13)                                   |
| 949.324  | 13.10 <sub>,</sub>  | 5.07  |                                             |
| 1000.383 | 38.41 <sub>,</sub>  | 14.88 | b11-98 (0.01)                               |
| 1001.411 | 18.19 <sub>,</sub>  | 7.04  |                                             |
| 1029.495 | 222.46 <sub>,</sub> | 86.18 | y10 (0.04)                                  |
| 1030.605 | 136.01 <sub>,</sub> | 52.69 |                                             |
| 1048.160 | 16.02 <sub>,</sub>  | 6.20  |                                             |
| 1098.305 | 6.97 <sub>,</sub>   | 2.70  | b11 (-0.04)                                 |
| 1131.642 | 3.31 <sub>,</sub>   | 1.28  |                                             |
| 1133.730 | 11.11 <sub>,</sub>  | 4.30  |                                             |
| 1158.632 | 2.70 <sub>,</sub>   | 1.04  | x11 (0.13)                                  |
| 1207.868 | 12.08 <sub>,</sub>  | 4.67  |                                             |
| 1225.367 | 13.76 <sub>,</sub>  | 5.33  | b13-98 (-0.11)                              |
| 1226.347 | 13.37 <sub>,</sub>  | 5.17  |                                             |
| 1227.479 | 8.08 <sub>,</sub>   | 3.13  | y12o (-0.03)                                |
| 1252.471 | 14.55 <sub>,</sub>  | 5.63  |                                             |
| 1305.353 | 3.85 <sub>,</sub>   | 1.49  | b13o (-0.10)                                |
| 1323.520 | 23.80 <sub>,</sub>  | 9.22  | b13 (0.05)                                  |
| 1324.202 | 4.71 <sub>,</sub>   | 1.82  |                                             |
| 1342.404 | 4.80 <sub>,</sub>   | 1.85  |                                             |
| 1350.441 | 5.60                | 2.16  |                                             |

**S758**

# ProPhosSI MS/MS report

Mass: 709.308974 Charge: 2+

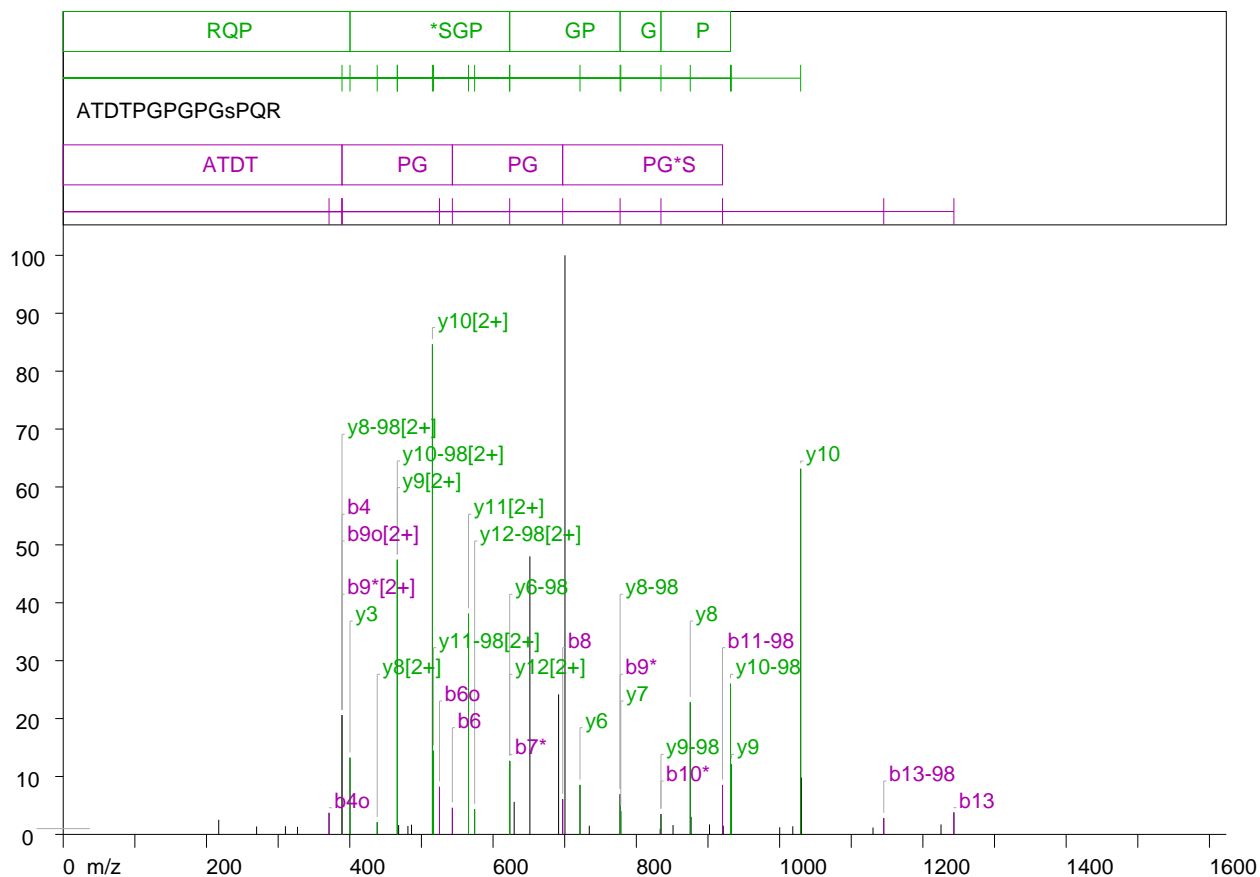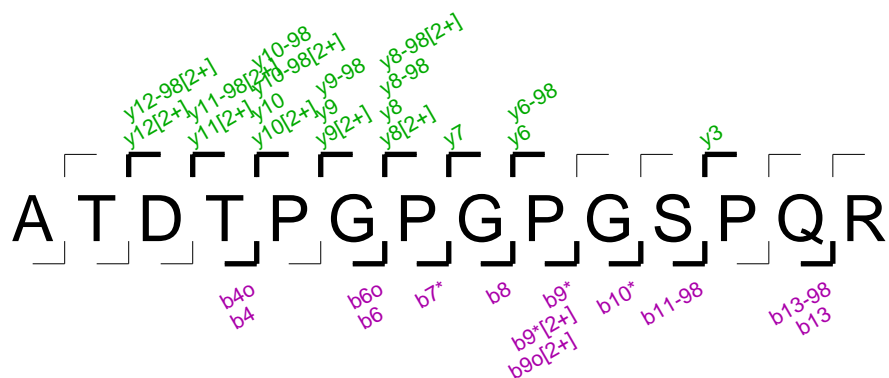

## Cav3.2 human

(78) 748 ATDTPGPGPGsPQR 762 1416.603 (-0.0012) Da

|                         |     |
|-------------------------|-----|
| Parent Ion              | m/z |
| No parent ions observed |     |

### Modifications and supporting evidence

| Position | Residue ID | Modification | Evidence               |
|----------|------------|--------------|------------------------|
| 11       | (758)      | Phospho (ST) | b8=>b11-98; y3=> y6-98 |

### Spectrum interpretation

| Rule                                   | passed/tests | Description                                                                                                                                                                                                                                                                                                                                                                                                                                                                                                                                                                                                                                     |
|----------------------------------------|--------------|-------------------------------------------------------------------------------------------------------------------------------------------------------------------------------------------------------------------------------------------------------------------------------------------------------------------------------------------------------------------------------------------------------------------------------------------------------------------------------------------------------------------------------------------------------------------------------------------------------------------------------------------------|
| Parent ions present                    | 0/1          | Parent ions corresponding to the parent fragment - 1 phosphate ions were not found                                                                                                                                                                                                                                                                                                                                                                                                                                                                                                                                                              |
| Three -98 Ions present                 | 1/1          | 8 des-phospho fragment ions were found.                                                                                                                                                                                                                                                                                                                                                                                                                                                                                                                                                                                                         |
| Unique -98 transitions present         | 1/1          | transition b8 to b11-98, transition y3 to y6-98 support unique phosphorylation at position 11<br><br/>                                                                                                                                                                                                                                                                                                                                                                                                                                                                                                                                          |
| Four Sequential b or y ions            | 1/1          | Sequence of four y ions found from y8-98 to y11-98.                                                                                                                                                                                                                                                                                                                                                                                                                                                                                                                                                                                             |
| Five of six sequential ions present    | 1/1          | Five of Six ions found between y6 and y11<br>Five of Six ions found between y7 and y12<br>Five of Six ions found between y8 and y13                                                                                                                                                                                                                                                                                                                                                                                                                                                                                                             |
| Proline directed fragmentation pattern | 8/8          | PASS: y10-98> y9-98 with ratio 13.4<br/><br>PASS: b5< b4<br/><br>NOTE: G-P is a low abundance fragmentation.<br>PASS: y8-98> y7-98<br/><br>PASS: b7< b6<br/><br>NOTE: G-P is a low abundance fragmentation.<br>PASS: y6-98> y5-98<br/><br>PASS: b9< b8<br/><br>NOTE: S-P is a low abundance fragmentation.<br>PASS: y3> y2<br/><br>PASS: b12-98< b11-98<br/>                                                                                                                                                                                                                                                                                    |
| PhosphoTyrosine transition present     | 0/0          | 0 of 0 phosphotyrosine transitions were found.                                                                                                                                                                                                                                                                                                                                                                                                                                                                                                                                                                                                  |
| Six of top ten ions identified         | 8/6          | ion 1 (mass: 700.363: intensity: 24205.44) assigned 0 times<br>ion 2 (mass: 515.358: intensity: 20480.61) assigned 2 times<br>ion 3 (mass: 1029.391: intensity: 15285.28) assigned 1 times<br>ion 4 (mass: 651.420: intensity: 11622.16) assigned 1 times<br>ion 5 (mass: 466.380: intensity: 11479.38) assigned 2 times<br>ion 6 (mass: 565.725: intensity: 9228.90) assigned 1 times<br>ion 7 (mass: 931.456: intensity: 6299.69) assigned 1 times<br>ion 8 (mass: 691.475: intensity: 5853.85) assigned 0 times<br>ion 9 (mass: 875.289: intensity: 5525.33) assigned 1 times<br>ion 10 (mass: 389.153: intensity: 4985.10) assigned 4 times |

## Ion Table

25 ions assigned of 31 ions above threshold (80%).

### N-terminal ions

| AA | N-ion | b                        | b*                                            | b-98                     | bo                            |
|----|-------|--------------------------|-----------------------------------------------|--------------------------|-------------------------------|
| A  | 1     | 72.044                   | 55.018                                        | -                        | 54.034                        |
| T  | 2     | 173.092                  | 156.066                                       | -                        | 155.082                       |
| D  | 3     | 288.119                  | 271.093                                       | -                        | 270.109                       |
| T  | 4     | 389.167<br>*389.153 (20) | 372.140                                       | -                        | 371.156<br>371.065 (3)        |
| P  | 5     | 486.220                  | 469.193                                       | -                        | 468.209                       |
| G  | 6     | 543.241<br>543.223 (4)   | 526.214                                       | -                        | 525.230<br>525.239 (8)        |
| P  | 7     | 640.294                  | 623.267<br>*623.234 (12)                      | -                        | 622.283                       |
| G  | 8     | 697.315<br>697.184 (6)   | 680.289                                       | -                        | 679.305                       |
| P  | 9     | 794.368                  | 777.341<br>*777.333 (6)<br>*389.153 [2+] (20) | -                        | 776.357<br>*389.153 [2+] (20) |
| G  | 10    | 851.389                  | 834.363<br>*834.378 (3)                       | -                        | 833.379                       |
| s  | 11    | 1018.388                 | 1001.361                                      | 920.402<br>920.264 (8)   | 1000.377                      |
| P  | 12    | 1115.441                 | 1098.414                                      | 1017.455                 | 1097.430                      |
| Q  | 13    | 1243.499<br>1243.292 (3) | 1226.473                                      | 1145.513<br>1145.387 (2) | 1225.489                      |
| R  | 14    | -                        | -                                             | -                        | -                             |

### C-terminal ions

| AA | C-ion | y                                               | y*       | y-98                                          | yo       |
|----|-------|-------------------------------------------------|----------|-----------------------------------------------|----------|
| A  | 14    | -                                               | -        | -                                             | -        |
| T  | 13    | 1346.574                                        | 1329.547 | 1248.588                                      | 1328.563 |
| D  | 12    | 1245.526<br>*623.234 [2+] (12)                  | 1228.499 | 1147.540<br>574.273 [2+] (4)                  | 1227.515 |
| T  | 11    | 1130.499<br>565.725 [2+] (38)                   | 1113.473 | 1032.513<br>516.816 [2+] (14)                 | 1112.489 |
| P  | 10    | 1029.451<br>*515.358 [2+] (84)<br>1029.391 (63) | 1012.425 | 931.466<br>*466.380 [2+] (47)<br>931.456 (26) | 1011.441 |
| G  | 9     | 932.399<br>*466.380 [2+] (47)<br>932.614 (12)   | 915.372  | 834.413<br>*834.378 (3)                       | 914.388  |
| P  | 8     | 875.377<br>438.294 [2+] (2)<br>875.289 (22)     | 858.351  | 777.391<br>*777.333 (6)<br>*389.153 [2+] (20) | 857.367  |
| G  | 7     | 778.324<br>778.288 (4)                          | 761.298  | 680.338                                       | 760.314  |
| P  | 6     | 721.303<br>721.353 (8)                          | 704.276  | 623.317<br>*623.234 (12)                      | 703.292  |
| G  | 5     | 624.250                                         | 607.224  | 526.264                                       | 606.240  |
| s  | 4     | 567.229                                         | 550.202  | 469.243                                       | 549.218  |
| P  | 3     | 400.230<br>400.306 (13)                         | 383.204  | -                                             | 382.220  |
| Q  | 2     | 303.178                                         | 286.151  | -                                             | 285.167  |
| R  | 1     | 175.119                                         | 158.092  | -                                             | 157.108  |

## Ion distribution

| Threshold | Ion count | Matches | % matched |
|-----------|-----------|---------|-----------|
| 0         | 70        | 44      | 62        |
| 0.5       | 55        | 41      | 74        |
| 1         | 45        | 35      | 77        |
| 2         | 31        | 25      | 80        |
| 3         | 28        | 23      | 82        |
| 4         | 24        | 20      | 83        |
| 5         | 21        | 17      | 80        |
| 10        | 14        | 12      | 85        |

### Observed ions > 1%

| m/z     | Intensity             | % max | Assignment (delta)                                                |
|---------|-----------------------|-------|-------------------------------------------------------------------|
| 217.075 | 613.38 <sub>3</sub>   | 2.53  |                                                                   |
| 269.935 | 329.83 <sub>3</sub>   | 1.36  | b3o (-0.17)                                                       |
| 310.177 | 341.55 <sub>3</sub>   | 1.41  |                                                                   |
| 327.046 | 314.78 <sub>3</sub>   | 1.30  | x5[2+] (0.41) : a8*[2+] (0.39)                                    |
| 371.065 | 901.40 <sub>3</sub>   | 3.72  | b4o (-0.09)                                                       |
| 389.153 | 4985.10 <sub>3</sub>  | 20.59 | b9o[2+] (0.47) : b4 (-0.01) : b9*[2+] (-0.02) : y8-98[2+] (-0.04) |
| 400.306 | 3208.41 <sub>3</sub>  | 13.25 | y3 (0.07)                                                         |
| 438.294 | 509.02 <sub>3</sub>   | 2.10  | y8[2+] (0.10)                                                     |
| 466.380 | 11479.38 <sub>3</sub> | 47.42 | y10-98[2+] (0.14) : y9[2+] (-0.32)                                |
| 468.202 | 389.40 <sub>3</sub>   | 1.60  | b5o (-0.00)                                                       |
| 481.138 | 352.09 <sub>3</sub>   | 1.45  | x9[2+] (0.43)                                                     |
| 486.164 | 405.77 <sub>3</sub>   | 1.67  | b5 (-0.05)                                                        |
| 515.358 | 20480.61 <sub>3</sub> | 84.61 | y10[2+] (0.12) : a6 (0.11)                                        |
| 516.816 | 3497.04 <sub>3</sub>  | 14.44 | y11-98[2+] (0.05)                                                 |
| 525.239 | 1988.81 <sub>3</sub>  | 8.21  | b6o (0.00)                                                        |
| 543.223 | 1111.56 <sub>3</sub>  | 4.59  | b6 (-0.01)                                                        |
| 565.725 | 9228.90 <sub>3</sub>  | 38.12 | y11[2+] (-0.02)                                                   |
| 574.273 | 1052.08 <sub>3</sub>  | 4.34  | y12-98[2+] (-0.00)                                                |
| 623.234 | 3071.68 <sub>3</sub>  | 12.69 | y12[2+] (-0.03) : b7* (-0.03) : y6-98 (-0.08)                     |
| 629.480 | 1360.09 <sub>3</sub>  | 5.61  |                                                                   |
| 651.420 | 11622.16 <sub>3</sub> | 48.01 | a8o (0.10)                                                        |
| 691.475 | 5853.85 <sub>3</sub>  | 24.18 |                                                                   |
| 697.184 | 1474.70 <sub>3</sub>  | 6.09  | b8 (-0.13)                                                        |
| 700.363 | 24205.44 <sub>3</sub> | 100   |                                                                   |
| 721.353 | 2069.46 <sub>3</sub>  | 8.54  | y6 (0.04)                                                         |
| 734.343 | 361.05 <sub>3</sub>   | 1.49  |                                                                   |
| 777.333 | 1677.25 <sub>3</sub>  | 6.92  | b9* (-0.00) : y8-98 (-0.05)                                       |
| 778.288 | 976.96 <sub>3</sub>   | 4.03  | y7 (-0.03)                                                        |

|          |                       |       |                             |
|----------|-----------------------|-------|-----------------------------|
| 834.378  | 852.98 <sub>3</sub>   | 3.52  | b10* (0.01) : y9-98 (-0.03) |
| 851.249  | 389.58 <sub>3</sub>   | 1.60  | b10 (-0.14)                 |
| 875.289  | 5525.33 <sub>3</sub>  | 22.82 | y8 (-0.08)                  |
| 876.397  | 735.03 <sub>3</sub>   | 3.03  |                             |
| 902.148  | 416.18 <sub>3</sub>   | 1.71  |                             |
| 920.264  | 2068.23 <sub>3</sub>  | 8.54  | b11-98 (-0.13)              |
| 921.339  | 364.42 <sub>3</sub>   | 1.50  |                             |
| 931.456  | 6299.69 <sub>3</sub>  | 26.02 | y10-98 (-0.01)              |
| 932.614  | 2944.36 <sub>3</sub>  | 12.16 | y9 (0.21)                   |
| 1000.140 | 295.93 <sub>3</sub>   | 1.22  | b11o (-0.23)                |
| 1018.408 | 338.78 <sub>3</sub>   | 1.39  | b11 (0.01)                  |
| 1029.391 | 15285.28 <sub>3</sub> | 63.14 | y10 (-0.06)                 |
| 1030.354 | 2369.95 <sub>3</sub>  | 9.79  |                             |
| 1130.354 | 286.77 <sub>3</sub>   | 1.18  | y11 (-0.14)                 |
| 1145.387 | 678.78 <sub>3</sub>   | 2.80  | b13-98 (-0.12)              |
| 1225.316 | 415.89 <sub>3</sub>   | 1.71  | b13o (-0.17)                |
| 1243.292 | 922.19 <sub>3</sub>   | 3.80  | b13 (-0.20)                 |

T1034 or

S1035



# ProPhosSI MS/MS report

Mass: 749.302559 Charge: 3+

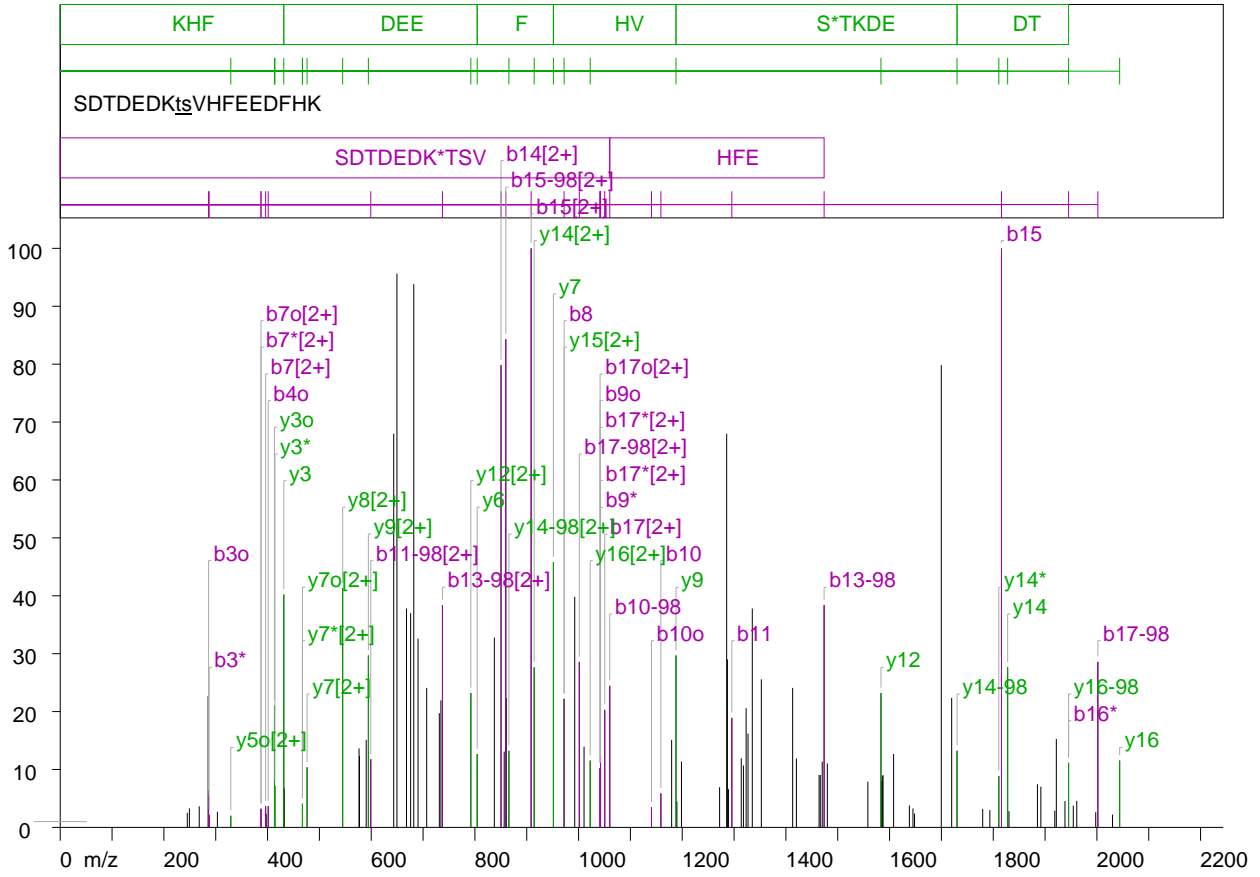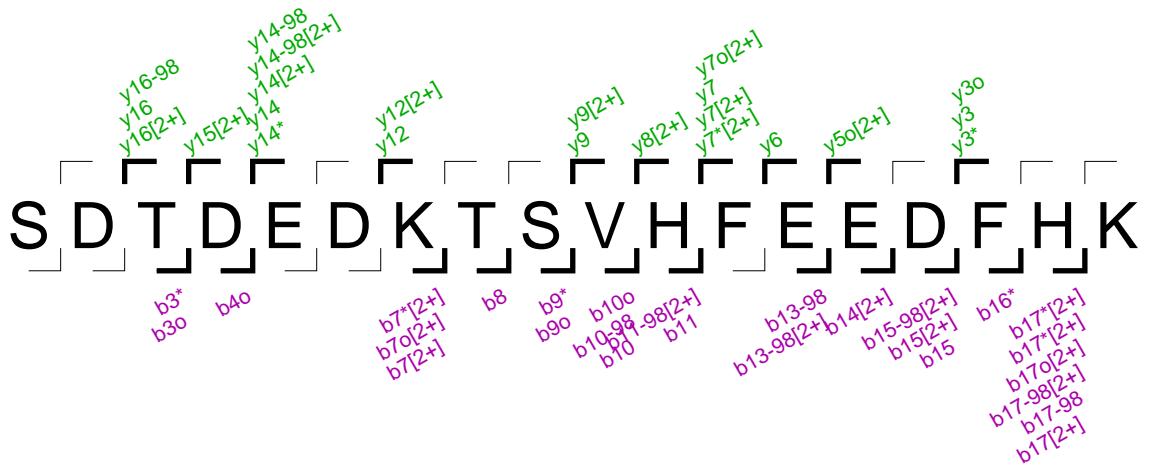

## Cav3.2 human

(27) 1027 SDTDEDK [stVHFEEDFK 1044 2244.884 \(-0.0006\) Da](#)

|                         |     |
|-------------------------|-----|
| Parent Ion              | m/z |
| No parent ions observed |     |

## Modifications and supporting evidence

| Position | Residue ID     | Modification | Evidence    |
|----------|----------------|--------------|-------------|
| 8 or 9   | (1034 or 1035) | Phospho (ST) | y9=> y14-98 |

## Spectrum interpretation

| Rule                                   | passed/tests | Description                                                                                                                                                                                                                                                                                                                                                                                                                                                                                                                                                                                                                                  |
|----------------------------------------|--------------|----------------------------------------------------------------------------------------------------------------------------------------------------------------------------------------------------------------------------------------------------------------------------------------------------------------------------------------------------------------------------------------------------------------------------------------------------------------------------------------------------------------------------------------------------------------------------------------------------------------------------------------------|
| Parent ions present                    | 0/1          | Parent ions corresponding to the parent fragment - 1 phosphate ions were not found                                                                                                                                                                                                                                                                                                                                                                                                                                                                                                                                                           |
| Three -98 Ions present                 | 1/1          | 7 des-phospho fragment ions were found.                                                                                                                                                                                                                                                                                                                                                                                                                                                                                                                                                                                                      |
| Unique -98 transitions present         | 0/1          | y9 to y 14-98 suggests phosphorylation at position 8 or 9                                                                                                                                                                                                                                                                                                                                                                                                                                                                                                                                                                                    |
| Four Sequential b or y ions            | 1/1          | Sequence of four y ions found from y6 to y9.                                                                                                                                                                                                                                                                                                                                                                                                                                                                                                                                                                                                 |
| Five of six sequential ions present    | 0/1          |                                                                                                                                                                                                                                                                                                                                                                                                                                                                                                                                                                                                                                              |
| Proline directed fragmentation pattern | 0/0          |                                                                                                                                                                                                                                                                                                                                                                                                                                                                                                                                                                                                                                              |
| PhosphoTyrosine transition present     | 0/0          | 0 of 0 phosphotyrosine transitions were found.                                                                                                                                                                                                                                                                                                                                                                                                                                                                                                                                                                                               |
| Six of top ten ions identified         | 5/6          | ion 1 (mass: 908.475: intensity: 3252.97) assigned 1 times<br>ion 2 (mass: 1815.942: intensity: 3252.97) assigned 1 times<br>ion 3 (mass: 649.612: intensity: 3111.14) assigned 0 times<br>ion 4 (mass: 682.082: intensity: 3051.69) assigned 0 times<br>ion 5 (mass: 859.576: intensity: 2742.17) assigned 2 times<br>ion 6 (mass: 850.407: intensity: 2597.12) assigned 1 times<br>ion 7 (mass: 1699.807: intensity: 2597.12) assigned 0 times<br>ion 8 (mass: 643.366: intensity: 2211.53) assigned 0 times<br>ion 9 (mass: 1285.724: intensity: 2211.53) assigned 0 times<br>ion 10 (mass: 951.444: intensity: 1489.84) assigned 1 times |

## Ion Table

43 ions assigned of 108 ions above threshold (39%).

### N-terminal ions

| AA | N-ion | b       | b*                      | b-98 | bo                     |
|----|-------|---------|-------------------------|------|------------------------|
| S  | 1     | 88.039  | 71.013                  | -    | 70.029                 |
| D  | 2     | 203.066 | 186.040                 | -    | 185.056                |
| T  | 3     | 304.114 | 287.087<br>*287.288 (2) | -    | 286.103<br>286.178 (5) |

|   |    |                                                  |                                                        |                                                 |                                 |
|---|----|--------------------------------------------------|--------------------------------------------------------|-------------------------------------------------|---------------------------------|
| D | 4  | 419.141                                          | 402.114                                                | -                                               | 401.130<br>401.245 (3)          |
| E | 5  | 548.184                                          | 531.157                                                | -                                               | 530.173                         |
| D | 6  | 663.210                                          | 646.184                                                | -                                               | 645.200                         |
| K | 7  | 791.305<br>396.285 [2+] (3)                      | 774.279<br>*387.339 [2+] (3)                           | -                                               | 773.295<br>*387.339 [2+] (3)    |
| t | 8  | 972.319<br>*972.139 (22)                         | 955.293                                                | 874.334                                         | 954.309                         |
| S | 9  | 1059.351                                         | 1042.325<br>*1042.370 (12)                             | 961.366                                         | 1041.341<br>*1041.546 (10)      |
| V | 10 | 1158.420<br>1158.802 (5)                         | 1141.393                                               | 1060.434<br>1060.150 (24)                       | 1140.409<br>1140.641 (3)        |
| H | 11 | 1295.479<br>1295.692 (18)                        | 1278.452                                               | 1197.493<br>599.128 [2+] (11)                   | 1277.468                        |
| F | 12 | 1442.547                                         | 1425.521                                               | 1344.561                                        | 1424.537                        |
| E | 13 | 1571.590                                         | 1554.563                                               | 1473.604<br>1473.709 (38)<br>737.358 [2+] (38)  | 1553.579                        |
| E | 14 | 1700.632<br>850.407 [2+] (79)                    | 1683.606                                               | 1602.647                                        | 1682.622                        |
| D | 15 | 1815.659<br>908.475 [2+] (100)<br>1815.942 (100) | 1798.633                                               | 1717.673<br>*859.576 [2+] (84)                  | 1797.649                        |
| F | 16 | 1962.728                                         | 1945.701<br>*1945.365 (11)                             | 1864.742                                        | 1944.717                        |
| H | 17 | 2099.787<br>1050.522 [2+] (20)                   | 2082.760<br>*1042.370 [2+] (12)<br>*1041.546 [2+] (10) | 2001.801<br>1001.419 [2+] (28)<br>2001.830 (28) | 2081.776<br>*1041.546 [2+] (10) |
| K | 18 | -                                                | -                                                      | -                                               | -                               |

### C-terminal ions

| AA | C-ion | y                                               | y*                           | y-98                                           | yo                           |
|----|-------|-------------------------------------------------|------------------------------|------------------------------------------------|------------------------------|
| S  | 18    | -                                               | -                            | -                                              | -                            |
| D  | 17    | 2158.860                                        | 2141.834                     | 2060.874                                       | 2140.850                     |
| T  | 16    | 2043.833<br>1022.433 [2+] (11)<br>2043.858 (11) | 2026.807                     | 1945.847<br>*1945.365 (11)                     | 2025.823                     |
| D  | 15    | 1942.786<br>*972.139 [2+] (22)                  | 1925.759                     | 1844.800                                       | 1924.775                     |
| E  | 14    | 1827.759<br>1827.810 (27)<br>914.408 [2+] (27)  | 1810.732<br>*1810.755 (8)    | 1729.773<br>865.580 [2+] (13)<br>1730.154 (13) | 1809.748                     |
| D  | 13    | 1698.716                                        | 1681.689                     | 1600.730                                       | 1680.705                     |
| K  | 12    | 1583.689<br>1583.390 (23)<br>792.199 [2+] (23)  | 1566.663                     | 1485.703                                       | 1565.679                     |
| t  | 11    | 1455.594                                        | 1438.568                     | 1357.608                                       | 1437.584                     |
| S  | 10    | 1274.580                                        | 1257.554                     | -                                              | 1256.570                     |
| V  | 9     | 1187.548<br>1187.943 (29)<br>594.475 [2+] (29)  | 1170.522                     | -                                              | 1169.538                     |
| H  | 8     | 1088.480<br>544.887 [2+] (41)                   | 1071.453                     | -                                              | 1070.469                     |
| F  | 7     | 951.421<br>476.240 [2+] (10)<br>951.444 (45)    | 934.394<br>*467.302 [2+] (4) | -                                              | 933.410<br>*467.302 [2+] (4) |
| E  | 6     | 804.352<br>804.406 (12)                         | 787.326                      | -                                              | 786.342                      |
| E  | 5     | 675.310                                         | 658.283                      | -                                              | 657.299<br>329.048 [2+] (2)  |

|   |   |                         |                         |   |                         |
|---|---|-------------------------|-------------------------|---|-------------------------|
| D | 4 | 546.267                 | 529.241                 | - | 528.257                 |
| F | 3 | 431.240<br>431.298 (40) | 414.214<br>*414.270 (7) | - | 413.230<br>413.313 (21) |
| H | 2 | 284.172                 | 267.145                 | - | 266.161                 |
| K | 1 | 147.113                 | 130.086                 | - | 129.102                 |

### Ion distribution

| Threshold | Ion count | Matches | % matched |
|-----------|-----------|---------|-----------|
| 0         | 108       | 43      | 39        |
| 0.5       | 108       | 43      | 39        |
| 1         | 108       | 43      | 39        |
| 2         | 108       | 43      | 39        |
| 3         | 97        | 41      | 42        |
| 4         | 87        | 37      | 42        |
| 5         | 83        | 36      | 43        |
| 10        | 68        | 32      | 47        |

### Observed ions > 1%

| m/z     | Intensity            | % max | Assignment (delta)                                |
|---------|----------------------|-------|---------------------------------------------------|
| 245.127 | 81.91 <sub>1</sub>   | 2.51  |                                                   |
| 249.149 | 106.60 <sub>1</sub>  | 3.27  |                                                   |
| 268.177 | 118.30 <sub>1</sub>  | 3.63  |                                                   |
| 285.251 | 738.77 <sub>1</sub>  | 22.71 |                                                   |
| 286.178 | 177.64 <sub>1</sub>  | 5.46  | b3o (0.07)                                        |
| 287.288 | 70.54 <sub>1</sub>   | 2.16  | b3* (0.20) : x4[2+] (-0.34)                       |
| 303.217 | 87.88 <sub>1</sub>   | 2.70  |                                                   |
| 329.048 | 65.39 <sub>1</sub>   | 2.01  | y5o[2+] (-0.10)                                   |
| 387.339 | 104.87 <sub>1</sub>  | 3.22  | b7o[2+] (0.18) : b7*[2+] (-0.30)                  |
| 396.285 | 119.15 <sub>1</sub>  | 3.66  | b7[2+] (0.12)                                     |
| 397.341 | 75.96 <sub>1</sub>   | 2.33  |                                                   |
| 401.245 | 119.24 <sub>1</sub>  | 3.66  | b4o (0.11)                                        |
| 413.313 | 684.73 <sub>1</sub>  | 21.04 | y3o (0.08)                                        |
| 414.270 | 233.79 <sub>1</sub>  | 7.18  | y3* (0.05) : z3 (0.05)                            |
| 431.298 | 1307.76 <sub>1</sub> | 40.20 | y3 (0.05)                                         |
| 432.228 | 219.00 <sub>1</sub>  | 6.73  |                                                   |
| 467.302 | 132.58 <sub>1</sub>  | 4.07  | y7o[2+] (0.09) : y7*[2+] (-0.39) : z7[2+] (-0.39) |
| 476.240 | 337.97 <sub>1</sub>  | 10.38 | y7[2+] (0.02)                                     |
| 544.887 | 1343.66 <sub>1</sub> | 41.30 | y8[2+] (0.14)                                     |
| 576.454 | 443.83 <sub>1</sub>  | 13.64 |                                                   |
| 577.346 | 401.70 <sub>1</sub>  | 12.34 |                                                   |
| 590.272 | 491.74 <sub>1</sub>  | 15.11 |                                                   |
| 594.475 | 965.64 <sub>1</sub>  | 29.68 | y9[2+] (0.19)                                     |

|          |          |       |                                                 |
|----------|----------|-------|-------------------------------------------------|
| 599.128  | 383.25,  | 11.78 | b11-98[2+] (-0.12)                              |
| 643.366  | 2211.53, | 67.98 |                                                 |
| 649.612  | 3111.14, | 95.63 |                                                 |
| 668.092  | 1229.49, | 37.79 |                                                 |
| 675.996  | 1203.46, | 36.99 |                                                 |
| 682.082  | 3051.69, | 93.81 |                                                 |
| 690.303  | 1060.44, | 32.59 |                                                 |
| 707.001  | 783.77,  | 24.09 |                                                 |
| 731.375  | 641.12,  | 19.70 |                                                 |
| 734.466  | 713.72,  | 21.94 |                                                 |
| 737.358  | 1249.16, | 38.40 | b13-98[2+] (0.05)                               |
| 792.199  | 755.10,  | 23.21 | y12[2+] (-0.14)                                 |
| 804.406  | 411.93,  | 12.66 | y6 (0.05)                                       |
| 837.535  | 1066.48, | 32.78 |                                                 |
| 850.407  | 2597.12, | 79.83 | b14[2+] (-0.41)                                 |
| 856.490  | 426.18,  | 13.10 |                                                 |
| 859.576  | 2742.17, | 84.29 | c14[2+] (0.24) : b15-98[2+] (0.23)              |
| 860.405  | 727.61,  | 22.36 |                                                 |
| 865.580  | 430.78,  | 13.24 | y14-98[2+] (0.18)                               |
| 908.475  | 3252.97, | 100   | b15[2+] (0.14)                                  |
| 914.408  | 899.54,  | 27.65 | y14[2+] (0.02)                                  |
| 951.444  | 1489.84, | 45.79 | y7 (0.02)                                       |
| 972.139  | 722.28,  | 22.20 | y15[2+] (0.24) : b8 (-0.18)                     |
| 992.583  | 1295.51, | 39.82 |                                                 |
| 1001.419 | 929.78,  | 28.58 | b17-98[2+] (0.01)                               |
| 1010.552 | 453.32,  | 13.93 |                                                 |
| 1022.433 | 375.55,  | 11.54 | y16[2+] (0.01)                                  |
| 1041.546 | 333.52,  | 10.25 | b9o (0.20) : b17o[2+] (0.15) : b17*[2+] (-0.33) |
| 1042.370 | 400.25,  | 12.30 | b17*[2+] (0.48) : b9* (0.04)                    |
| 1050.522 | 660.44,  | 20.30 | b17[2+] (0.12)                                  |
| 1060.150 | 795.56,  | 24.45 | b10-98 (-0.28)                                  |
| 1140.641 | 113.41,  | 3.48  | b10o (0.23)                                     |
| 1158.802 | 191.31,  | 5.88  | b10 (0.38)                                      |
| 1179.537 | 491.74,  | 15.11 |                                                 |
| 1187.943 | 965.64,  | 29.68 | y9 (0.39)                                       |
| 1189.701 | 145.69,  | 4.47  |                                                 |
| 1198.470 | 370.68,  | 11.39 |                                                 |
| 1272.088 | 225.81,  | 6.94  |                                                 |
| 1285.724 | 2211.53, | 67.98 |                                                 |
| 1287.141 | 943.68,  | 29.00 |                                                 |
| 1289.135 | 214.50,  | 6.59  |                                                 |
| 1295.692 | 615.54,  | 18.92 | b11 (0.21)                                      |

|          |                      |       |                               |
|----------|----------------------|-------|-------------------------------|
| 1313.863 | 387.86 <sub>3</sub>  | 11.92 |                               |
| 1318.047 | 347.91 <sub>3</sub>  | 10.69 |                               |
| 1323.286 | 669.53 <sub>3</sub>  | 20.58 |                               |
| 1326.921 | 526.52 <sub>3</sub>  | 16.18 |                               |
| 1335.177 | 1229.49 <sub>3</sub> | 37.79 |                               |
| 1352.624 | 831.70 <sub>3</sub>  | 25.56 |                               |
| 1412.995 | 783.77 <sub>3</sub>  | 24.09 |                               |
| 1420.246 | 387.06 <sub>3</sub>  | 11.89 |                               |
| 1464.013 | 295.07 <sub>3</sub>  | 9.07  |                               |
| 1466.324 | 293.94 <sub>3</sub>  | 9.03  |                               |
| 1470.057 | 369.39 <sub>3</sub>  | 11.35 |                               |
| 1473.709 | 1249.16 <sub>3</sub> | 38.40 | b13-98 (0.10)                 |
| 1479.951 | 359.31 <sub>3</sub>  | 11.04 |                               |
| 1558.106 | 256.95 <sub>3</sub>  | 7.89  |                               |
| 1583.390 | 755.10 <sub>3</sub>  | 23.21 | y12 (-0.29)                   |
| 1584.765 | 260.81 <sub>3</sub>  | 8.01  |                               |
| 1586.011 | 290.61 <sub>3</sub>  | 8.93  |                               |
| 1587.467 | 292.84 <sub>3</sub>  | 9.00  |                               |
| 1607.805 | 411.93 <sub>3</sub>  | 12.66 |                               |
| 1638.202 | 123.18 <sub>3</sub>  | 3.78  |                               |
| 1645.162 | 106.56 <sub>3</sub>  | 3.27  |                               |
| 1648.102 | 77.94 <sub>3</sub>   | 2.39  |                               |
| 1699.807 | 2597.12 <sub>3</sub> | 79.83 |                               |
| 1719.803 | 727.61 <sub>3</sub>  | 22.36 |                               |
| 1730.154 | 430.78 <sub>3</sub>  | 13.24 | y14-98 (0.38)                 |
| 1779.667 | 103.74 <sub>3</sub>  | 3.18  |                               |
| 1793.445 | 97.21 <sub>3</sub>   | 2.98  |                               |
| 1810.755 | 288.89 <sub>3</sub>  | 8.88  | y14* (0.02) : z14 (0.02)      |
| 1815.942 | 3252.97 <sub>3</sub> | 100   | b15 (0.28)                    |
| 1827.810 | 899.54 <sub>3</sub>  | 27.65 | y14 (0.05)                    |
| 1830.367 | 90.54 <sub>3</sub>   | 2.78  |                               |
| 1885.273 | 242.46 <sub>3</sub>  | 7.45  |                               |
| 1891.869 | 228.48 <sub>3</sub>  | 7.02  |                               |
| 1918.794 | 94.23 <sub>3</sub>   | 2.89  |                               |
| 1921.726 | 496.88 <sub>3</sub>  | 15.27 |                               |
| 1938.393 | 147.99 <sub>3</sub>  | 4.54  |                               |
| 1945.365 | 362.31 <sub>3</sub>  | 11.13 | b16* (-0.33) : y16-98 (-0.48) |
| 1954.411 | 122.35 <sub>3</sub>  | 3.76  |                               |
| 1961.117 | 149.19 <sub>3</sub>  | 4.58  |                               |
| 1997.744 | 85.67 <sub>3</sub>   | 2.63  |                               |
| 2001.830 | 929.78 <sub>3</sub>  | 28.58 | b17-98 (0.02)                 |
| 2030.146 | 71.75 <sub>3</sub>   | 2.20  |                               |

|          |        |       |            |
|----------|--------|-------|------------|
| 2043.858 | 375.55 | 11.54 | y16 (0.02) |
|----------|--------|-------|------------|

**T1061**



# ProPhosSI MS/MS report

Mass: 615.784341 Charge: 2+

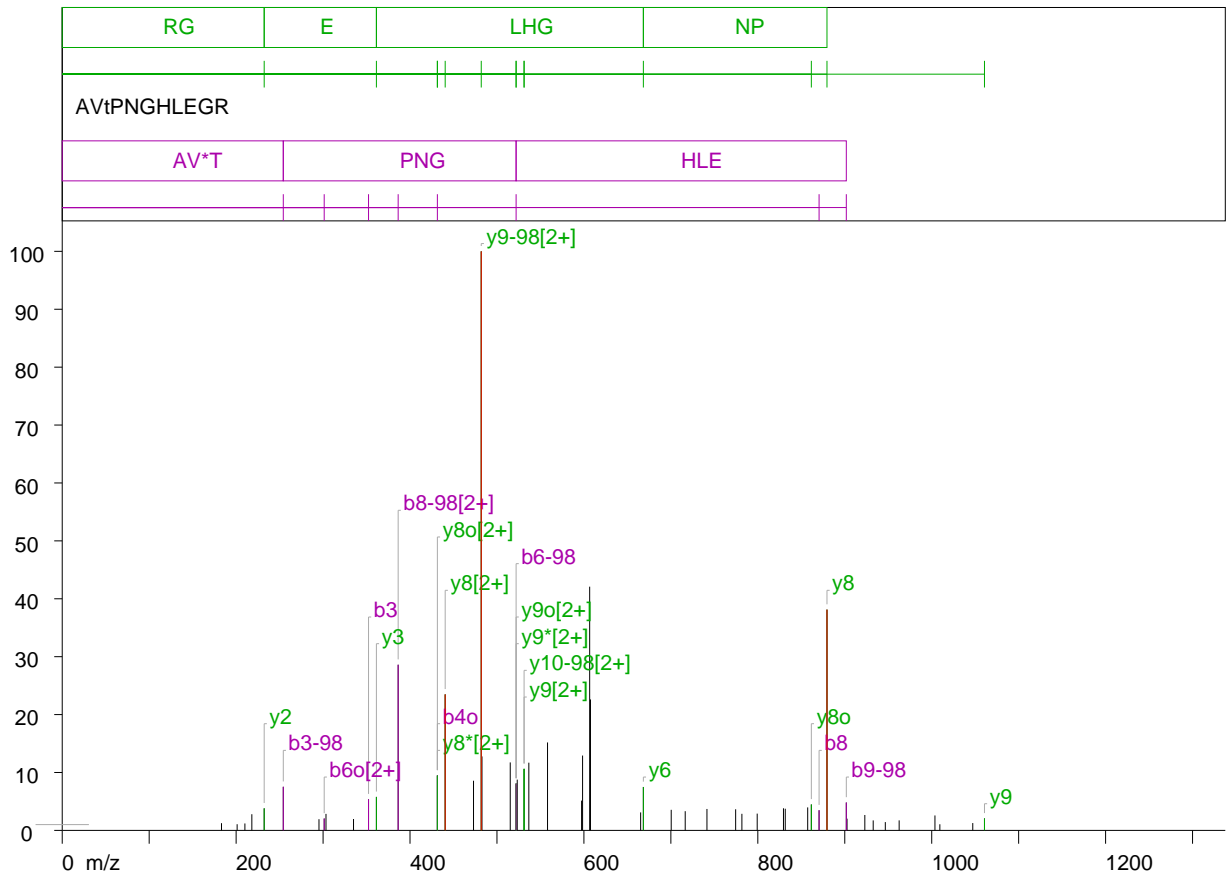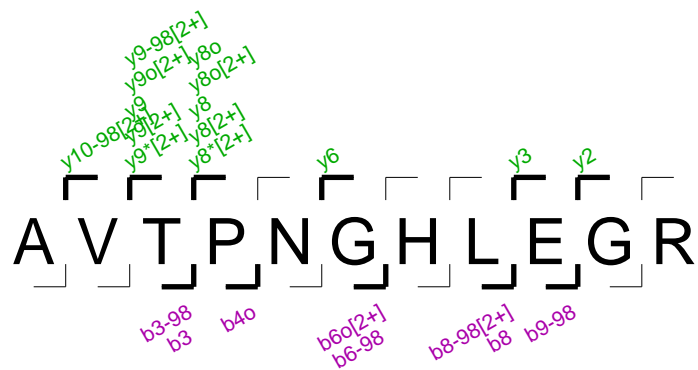

## Cav3.2 human

(16) 1059 AVtPNGHLEGR 1069 1229.555 (-0.0023) Da

|                         |     |
|-------------------------|-----|
| Parent Ion              | m/z |
| No parent ions observed |     |

## Modifications and supporting evidence

| Position | Residue ID | Modification | Evidence    |
|----------|------------|--------------|-------------|
| 3        | (1061)     | Phospho (ST) | y8 => y9-98 |

## Spectrum interpretation

| Rule                                   | passed/tests | Description                                                                                                                                                                                                                                                                                                                                                                                                                                                                                                                                                                                                                      |
|----------------------------------------|--------------|----------------------------------------------------------------------------------------------------------------------------------------------------------------------------------------------------------------------------------------------------------------------------------------------------------------------------------------------------------------------------------------------------------------------------------------------------------------------------------------------------------------------------------------------------------------------------------------------------------------------------------|
| Parent ions present                    | 0/1          | Parent ions corresponding to the parent fragment - 1 phosphate ions were not found                                                                                                                                                                                                                                                                                                                                                                                                                                                                                                                                               |
| Three -98 ions present                 | 1/1          | 6 des-phospho fragment ions were found.                                                                                                                                                                                                                                                                                                                                                                                                                                                                                                                                                                                          |
| Unique -98 transitions present         | 1/1          | transition y8 to y9-98 support unique phosphorylation at position 3<br><br/>                                                                                                                                                                                                                                                                                                                                                                                                                                                                                                                                                     |
| Four Sequential b or y ions            | 0/1          | Sequence of four y or b ions not observed                                                                                                                                                                                                                                                                                                                                                                                                                                                                                                                                                                                        |
| Five of six sequential ions present    | 0/1          |                                                                                                                                                                                                                                                                                                                                                                                                                                                                                                                                                                                                                                  |
| Proline directed fragmentation pattern | 2/2          | PASS: y8> y7<br/><br>PASS: b4-98< b3-98<br/>                                                                                                                                                                                                                                                                                                                                                                                                                                                                                                                                                                                     |
| PhosphoTyrosine transition present     | 0/0          | 0 of 0 phosphotyrosine transitions were found.                                                                                                                                                                                                                                                                                                                                                                                                                                                                                                                                                                                   |
| Six of top ten ions identified         | 4/6          | ion 1 (mass: 481.934: intensity: 1691.47) assigned 1 times<br>ion 2 (mass: 606.609: intensity: 711.99) assigned 0 times<br>ion 3 (mass: 879.541: intensity: 644.84) assigned 1 times<br>ion 4 (mass: 386.353: intensity: 483.93) assigned 1 times<br>ion 5 (mass: 440.447: intensity: 397.30) assigned 1 times<br>ion 6 (mass: 607.540: intensity: 382.53) assigned 0 times<br>ion 7 (mass: 558.166: intensity: 256.89) assigned 0 times<br>ion 8 (mass: 598.451: intensity: 218.67) assigned 0 times<br>ion 9 (mass: 482.740: intensity: 216.12) assigned 0 times<br>ion 10 (mass: 515.277: intensity: 198.56) assigned 0 times |

## Ion Table

18 ions assigned of 42 ions above threshold (42%).

### N-terminal ions

| AA | N-ion | b                      | b*      | b-98                   | bo      |
|----|-------|------------------------|---------|------------------------|---------|
| A  | 1     | 72.044                 | 55.018  | -                      | 54.034  |
| V  | 2     | 171.113                | 154.086 | -                      | 153.102 |
| t  | 3     | 352.127<br>352.274 (5) | 335.100 | 254.141<br>254.232 (7) | 334.116 |

|   |    |                        |          |                              |                             |
|---|----|------------------------|----------|------------------------------|-----------------------------|
| P | 4  | 449.180                | 432.153  | 351.194                      | 431.169<br>*431.457 (9)     |
| N | 5  | 563.223                | 546.196  | 465.237                      | 545.212                     |
| G | 6  | 620.244                | 603.217  | 522.258<br>*522.007 (8)      | 602.233<br>301.303 [2+] (2) |
| H | 7  | 757.303                | 740.276  | 659.317                      | 739.292                     |
| L | 8  | 870.387<br>870.466 (3) | 853.360  | 772.401<br>386.353 [2+] (28) | 852.376                     |
| E | 9  | 999.430                | 982.403  | 901.444<br>901.774 (4)       | 981.419                     |
| G | 10 | 1056.451               | 1039.425 | 958.465                      | 1038.441                    |
| R | 11 | -                      | -        | -                            | -                           |

### C-terminal ions

| AA | C-ion | y                                              | y*                            | y-98                           | yo                                          |
|----|-------|------------------------------------------------|-------------------------------|--------------------------------|---------------------------------------------|
| A  | 11    | -                                              | -                             | -                              | -                                           |
| V  | 10    | 1159.526                                       | 1142.499                      | 1061.540<br>*531.204 [2+] (10) | 1141.515                                    |
| t  | 9     | 1060.457<br>*531.204 [2+] (10)<br>1060.678 (2) | 1043.431<br>*522.007 [2+] (8) | 962.471<br>481.934 [2+] (100)  | 1042.447<br>*522.007 [2+] (8)               |
| P  | 8     | 879.443<br>440.447 [2+] (23)<br>879.541 (38)   | 862.417<br>*431.457 [2+] (9)  | -                              | 861.433<br>*431.457 [2+] (9)<br>861.585 (4) |
| N  | 7     | 782.390                                        | 765.364                       | -                              | 764.380                                     |
| G  | 6     | 668.348<br>668.362 (7)                         | 651.321                       | -                              | 650.337                                     |
| H  | 5     | 611.326                                        | 594.300                       | -                              | 593.315                                     |
| L  | 4     | 474.267                                        | 457.241                       | -                              | 456.257                                     |
| E  | 3     | 361.183<br>361.349 (5)                         | 344.157                       | -                              | 343.173                                     |
| G  | 2     | 232.140<br>232.274 (3)                         | 215.114                       | -                              | 214.130                                     |
| R  | 1     | 175.119                                        | 158.092                       | -                              | 157.108                                     |

### Ion distribution

| Threshold | Ion count | Matches | % matched |
|-----------|-----------|---------|-----------|
| 0         | 56        | 20      | 35        |
| 0.5       | 55        | 20      | 36        |
| 1         | 52        | 20      | 38        |
| 2         | 42        | 18      | 42        |
| 3         | 33        | 16      | 48        |
| 4         | 23        | 13      | 56        |
| 5         | 21        | 11      | 52        |
| 10        | 12        | 5       | 41        |

### Observed ions > 1%

| m/z     | Intensity | % max | Assignment (delta) |
|---------|-----------|-------|--------------------|
| 183.177 | 21.07     | 1.24  |                    |

|         |          |       |                                                                      |
|---------|----------|-------|----------------------------------------------------------------------|
| 201.158 | 18.03,   | 1.06  |                                                                      |
| 210.088 | 20.26,   | 1.19  |                                                                      |
| 218.072 | 47.25,   | 2.79  |                                                                      |
| 232.274 | 64.48,   | 3.81  | y2 (0.13)                                                            |
| 254.232 | 127.39,  | 7.53  | b3-98 (0.09)                                                         |
| 295.280 | 32.68,   | 1.93  |                                                                      |
| 301.303 | 34.71,   | 2.05  | b6o[2+] (-0.31)                                                      |
| 303.347 | 48.22,   | 2.85  |                                                                      |
| 335.010 | 33.28,   | 1.96  | y6[2+] (0.33) : b3* (-0.09)                                          |
| 352.274 | 90.96,   | 5.37  | b3 (0.14)                                                            |
| 361.349 | 97.84,   | 5.78  | y3 (0.16)                                                            |
| 386.353 | 483.93,  | 28.61 | b8-98[2+] (-0.35)                                                    |
| 431.457 | 160.51,  | 9.48  | b4o (0.28) : y8o[2+] (0.23) :<br>y8*[2+] (-0.25) : z8[2+] (-0.25)    |
| 440.447 | 397.30,  | 23.48 | y8[2+] (0.22)                                                        |
| 473.017 | 145.09,  | 8.57  |                                                                      |
| 481.934 | 1691.47, | 100   | y9-98[2+] (0.19)                                                     |
| 482.740 | 216.12,  | 12.77 |                                                                      |
| 515.277 | 198.56,  | 11.73 |                                                                      |
| 522.007 | 136.84,  | 8.09  | y9o[2+] (0.27) : y9*[2+] (-0.21) :<br>z9[2+] (-0.21) : b6-98 (-0.25) |
| 523.290 | 148.34,  | 8.76  |                                                                      |
| 531.204 | 179.80,  | 10.62 | y9[2+] (0.47) : y10-98[2+] (-0.07)                                   |
| 536.645 | 197.78,  | 11.69 |                                                                      |
| 558.166 | 256.89,  | 15.18 |                                                                      |
| 597.334 | 87.01,   | 5.14  |                                                                      |
| 598.451 | 218.67,  | 12.92 |                                                                      |
| 606.609 | 711.99,  | 42.09 |                                                                      |
| 607.540 | 382.53,  | 22.61 |                                                                      |
| 665.247 | 52.55,   | 3.10  |                                                                      |
| 668.362 | 126.85,  | 7.49  | y6 (0.01)                                                            |
| 700.414 | 60.12,   | 3.55  |                                                                      |
| 716.508 | 56.11,   | 3.31  |                                                                      |
| 741.514 | 62.62,   | 3.70  |                                                                      |
| 774.509 | 61.70,   | 3.64  | c7 (0.17)                                                            |
| 781.696 | 48.46,   | 2.86  |                                                                      |
| 799.293 | 49.02,   | 2.89  |                                                                      |
| 829.515 | 64.56,   | 3.81  |                                                                      |
| 831.558 | 63.32,   | 3.74  |                                                                      |
| 857.367 | 67.17,   | 3.97  |                                                                      |
| 861.585 | 75.76,   | 4.47  | y8o (0.15)                                                           |
| 870.466 | 58.87,   | 3.48  | b8 (0.07)                                                            |

|          |                     |       |              |
|----------|---------------------|-------|--------------|
| 879.541  | 644.84 <sub>3</sub> | 38.12 | y8 (0.09)    |
| 901.774  | 81.43 <sub>3</sub>  | 4.81  | b9-98 (0.32) |
| 902.608  | 34.28 <sub>3</sub>  | 2.02  |              |
| 923.075  | 45.00 <sub>3</sub>  | 2.66  |              |
| 932.697  | 29.21 <sub>3</sub>  | 1.72  |              |
| 946.634  | 24.27 <sub>3</sub>  | 1.43  |              |
| 962.571  | 29.29 <sub>3</sub>  | 1.73  | y9-98 (0.09) |
| 1003.737 | 43.65 <sub>3</sub>  | 2.58  |              |
| 1009.366 | 17.90 <sub>3</sub>  | 1.05  |              |
| 1047.228 | 21.43 <sub>3</sub>  | 1.26  |              |
| 1060.678 | 35.00 <sub>3</sub>  | 2.06  | y9 (0.22)    |

**S1071**

# ProPhosSI MS/MS report

Mass: 1075.507504 Charge: 2+

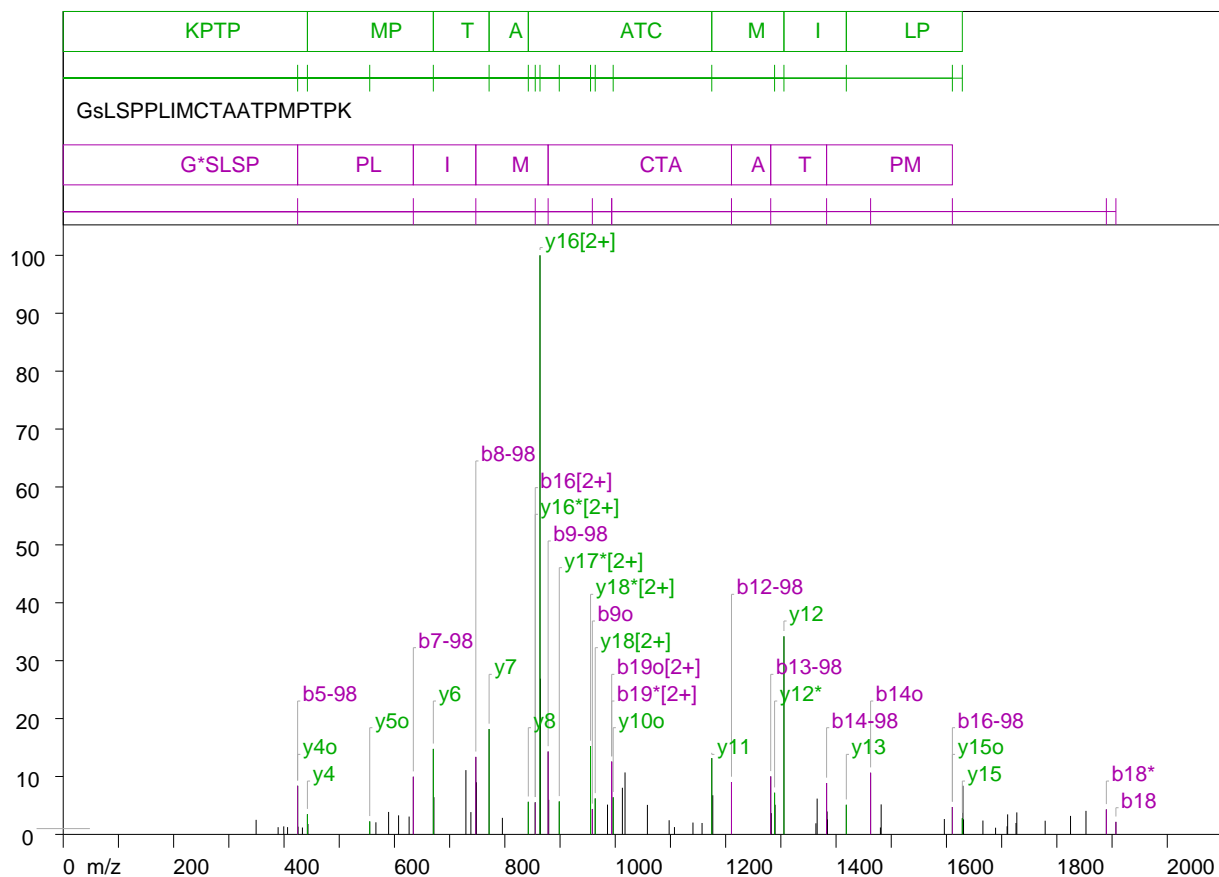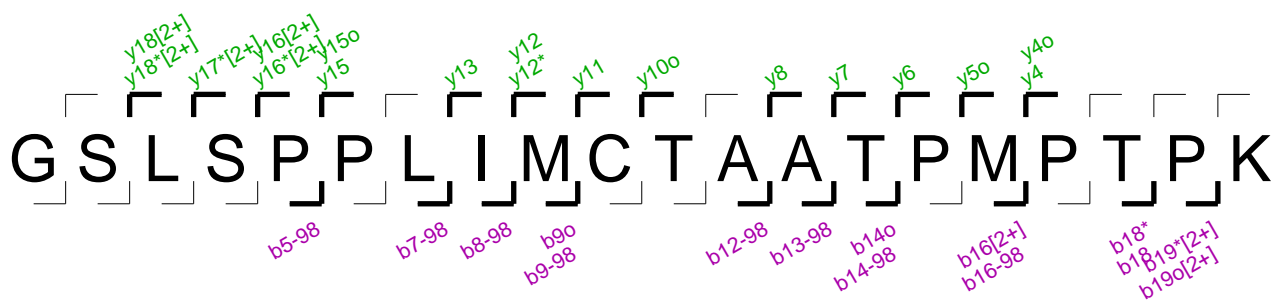

## Cav3.2 human

(35) 1070  $\tilde{\text{G}}\text{sLSPPLIMCTAATPMPTPK 1089 2149.002 (-0.0029) \text{ Da}$

|                         |     |
|-------------------------|-----|
| Parent Ion              | m/z |
| No parent ions observed |     |

### Modifications and supporting evidence

| Position | Residue ID | Modification | Evidence                                                                                         |
|----------|------------|--------------|--------------------------------------------------------------------------------------------------|
| 2        | (1071)     | Phospho (ST) | y17*[2+], y18[2+], y18*[2+]<br>exclude phosphorylation<br>on other position except<br>position 2 |

### Spectrum interpretation

| Rule                                   | passed/tests | Description                                                                                                                                                                                                                                                                                                                                                                                                                                                                                                                                                                                                                |
|----------------------------------------|--------------|----------------------------------------------------------------------------------------------------------------------------------------------------------------------------------------------------------------------------------------------------------------------------------------------------------------------------------------------------------------------------------------------------------------------------------------------------------------------------------------------------------------------------------------------------------------------------------------------------------------------------|
| Parent ions present                    | 0/1          | Parent ions corresponding to the parent fragment - 1 phosphate ions were not found                                                                                                                                                                                                                                                                                                                                                                                                                                                                                                                                         |
| Three -98 Ions present                 | 1/1          | 8 des-phospho fragment ions were found.                                                                                                                                                                                                                                                                                                                                                                                                                                                                                                                                                                                    |
| Unique -98 transitions present         | 0/1          | No transitions found to support unique phosphorylation at position 2<br><br/>                                                                                                                                                                                                                                                                                                                                                                                                                                                                                                                                              |
| Four Sequential b or y ions            | 0/1          | Sequence of four y or b ions not observed                                                                                                                                                                                                                                                                                                                                                                                                                                                                                                                                                                                  |
| Five of six sequential ions present    | 1/1          | Five of Six ions found between y11 and y16                                                                                                                                                                                                                                                                                                                                                                                                                                                                                                                                                                                 |
| Proline directed fragmentation pattern | 7/8          | NOTE: S-P is a low abundance fragmentation.<br>PASS: y16> y15 with ratio 35.7<br/><br>FAIL: b5-98> b4-98<br/>NOTE: P-P is a low abundance fragmentation.<br>PASS: y15> y14<br/><br>PASS: b6-98< b5-98<br/><br>PASS: y6> y5<br/><br>PASS: b15-98< b14-98<br/><br>PASS: y4> y3<br/><br>PASS: b17-98< b16-98<br/><br>No proline ions at y2<br>No proline ions at b19-98<br/>                                                                                                                                                                                                                                                  |
| PhosphoTyrosine transition present     | 0/0          | 0 of 0 phosphotyrosine transitions were found.                                                                                                                                                                                                                                                                                                                                                                                                                                                                                                                                                                             |
| Six of top ten ions identified         | 9/6          | ion 1 (mass: 863.680: intensity: 371.96) assigned 2 times<br>ion 2 (mass: 1305.616: intensity: 127.22) assigned 1 times<br>ion 3 (mass: 864.483: intensity: 100.05) assigned 0 times<br>ion 4 (mass: 771.487: intensity: 67.69) assigned 1 times<br>ion 5 (mass: 955.242: intensity: 56.75) assigned 2 times<br>ion 6 (mass: 670.452: intensity: 54.92) assigned 1 times<br>ion 7 (mass: 878.431: intensity: 53.24) assigned 1 times<br>ion 8 (mass: 747.408: intensity: 49.79) assigned 1 times<br>ion 9 (mass: 1174.841: intensity: 48.99) assigned 1 times<br>ion 10 (mass: 993.544: intensity: 46.73) assigned 3 times |



## Ion Table

30 ions assigned of 63 ions above threshold (47%).

### N-terminal ions

| AA | N-ion | b                             | b*                             | b-98                      | bo                             |
|----|-------|-------------------------------|--------------------------------|---------------------------|--------------------------------|
| G  | 1     | 58.029                        | 41.002                         | -                         | 40.018                         |
| s  | 2     | 225.027                       | 208.001                        | 127.041                   | 207.017                        |
| L  | 3     | 338.111                       | 321.085                        | 240.125                   | 320.101                        |
| S  | 4     | 425.143                       | 408.117                        | 327.157                   | 407.133                        |
| P  | 5     | 522.196                       | 505.169                        | 424.210<br>*424.594 (8)   | 504.185                        |
| P  | 6     | 619.249                       | 602.222                        | 521.263                   | 601.238                        |
| L  | 7     | 732.333                       | 715.306                        | 634.347<br>634.236 (9)    | 714.322                        |
| I  | 8     | 845.417                       | 828.390                        | 747.431<br>747.408 (13)   | 827.406                        |
| M  | 9     | 976.457                       | 959.431                        | 878.471<br>878.431 (14)   | 958.447<br>958.552 (4)         |
| C  | 10    | 1136.488                      | 1119.461                       | 1038.502                  | 1118.477                       |
| T  | 11    | 1237.536                      | 1220.509                       | 1139.550                  | 1219.525                       |
| A  | 12    | 1308.573                      | 1291.546                       | 1210.587<br>1210.558 (9)  | 1290.562                       |
| A  | 13    | 1379.610                      | 1362.583                       | 1281.624<br>1281.651 (10) | 1361.599                       |
| T  | 14    | 1480.658                      | 1463.631                       | 1382.672<br>1382.848 (8)  | 1462.647<br>1462.603 (10)      |
| P  | 15    | 1577.710                      | 1560.684                       | 1479.725                  | 1559.700                       |
| M  | 16    | 1708.751<br>*855.101 [2+] (5) | 1691.724                       | 1610.765<br>*1610.746 (4) | 1690.740                       |
| P  | 17    | 1805.804                      | 1788.777                       | 1707.818                  | 1787.793                       |
| T  | 18    | 1906.851<br>1906.964 (2)      | 1889.825<br>1889.671 (4)       | 1808.865                  | 1888.841                       |
| P  | 19    | 2003.904                      | 1986.878<br>*993.544 [2+] (12) | 1905.918                  | 1985.894<br>*993.544 [2+] (12) |
| K  | 20    | -                             | -                              | -                         | -                              |

### C-terminal ions

| AA | C-ion | y                               | y*                             | y-98     | yo                        |
|----|-------|---------------------------------|--------------------------------|----------|---------------------------|
| G  | 20    | -                               | -                              | -        | -                         |
| s  | 19    | 2092.988                        | 2075.962                       | 1995.002 | 2074.978                  |
| L  | 18    | 1925.990<br>963.730 [2+] (6)    | 1908.963<br>*955.242 [2+] (15) | -        | 1907.979                  |
| S  | 17    | 1812.906                        | 1795.879<br>*898.608 [2+] (5)  | -        | 1794.895                  |
| P  | 16    | 1725.874<br>*863.680 [2+] (100) | 1708.847<br>*855.101 [2+] (5)  | -        | 1707.863                  |
| P  | 15    | 1628.821<br>1628.758 (2)        | 1611.794                       | -        | 1610.810<br>*1610.746 (4) |
| L  | 14    | 1531.768                        | 1514.742                       | -        | 1513.758                  |
| I  | 13    | 1418.684<br>1418.613 (5)        | 1401.658                       | -        | 1400.674                  |
| M  | 12    | 1305.600<br>1305.616 (34)       | 1288.574<br>*1288.633 (7)      | -        | 1287.590                  |
| C  | 11    | 1174.560<br>1174.841 (13)       | 1157.533                       | -        | 1156.549                  |

|   |    |                         |         |   |                         |
|---|----|-------------------------|---------|---|-------------------------|
| T | 10 | 1014.529                | 997.502 | - | 996.518<br>996.261 (6)  |
| A | 9  | 913.481                 | 896.455 | - | 895.471                 |
| A | 8  | 842.444<br>842.522 (5)  | 825.418 | - | 824.434                 |
| T | 7  | 771.407<br>771.487 (18) | 754.380 | - | 753.396                 |
| P | 6  | 670.359<br>670.452 (14) | 653.333 | - | 652.349                 |
| M | 5  | 573.307                 | 556.280 | - | 555.296<br>*555.219 (2) |
| P | 4  | 442.266<br>*442.355 (3) | 425.240 | - | 424.256<br>*424.594 (8) |
| T | 3  | 345.213                 | 328.187 | - | 327.203                 |
| P | 2  | 244.166                 | 227.139 | - | 226.155                 |
| K | 1  | 147.113                 | 130.086 | - | 129.102                 |

### Ion distribution

| Threshold | Ion count | Matches | % matched |
|-----------|-----------|---------|-----------|
| 0         | 79        | 34      | 43        |
| 0.5       | 79        | 34      | 43        |
| 1         | 76        | 34      | 44        |
| 2         | 63        | 30      | 47        |
| 3         | 50        | 26      | 52        |
| 4         | 40        | 25      | 62        |
| 5         | 36        | 22      | 61        |
| 10        | 14        | 11      | 78        |

### Observed ions > 1%

| m/z     | Intensity          | % max | Assignment (delta)                 |
|---------|--------------------|-------|------------------------------------|
| 349.452 | 9.35 <sub>2</sub>  | 2.51  | x6[2+] (-0.22)                     |
| 389.310 | 4.63 <sub>2</sub>  | 1.24  |                                    |
| 399.503 | 5.14 <sub>2</sub>  | 1.38  |                                    |
| 406.379 | 4.66 <sub>2</sub>  | 1.25  |                                    |
| 424.594 | 31.20 <sub>2</sub> | 8.38  | b5-98 (0.38) : y4o (0.33)          |
| 425.329 | 4.96 <sub>2</sub>  | 1.33  | b4 (0.18) : y4* (0.08) : z4 (0.08) |
| 433.291 | 4.42 <sub>2</sub>  | 1.18  |                                    |
| 442.355 | 12.94 <sub>2</sub> | 3.47  | c4 (0.18) : y4 (0.08)              |
| 443.357 | 6.68 <sub>2</sub>  | 1.79  |                                    |
| 555.219 | 8.35 <sub>2</sub>  | 2.24  | a10[2+] (0.46) : y5o (-0.07)       |
| 566.435 | 7.77 <sub>2</sub>  | 2.08  |                                    |
| 589.417 | 14.43 <sub>2</sub> | 3.87  |                                    |
| 607.484 | 12.24 <sub>2</sub> | 3.29  |                                    |
| 626.608 | 11.46 <sub>2</sub> | 3.08  |                                    |
| 634.236 | 37.05 <sub>2</sub> | 9.96  | b7-98 (-0.11)                      |

|          |                     |       |                                                   |
|----------|---------------------|-------|---------------------------------------------------|
| 670.452  | 54.92 <sub>3</sub>  | 14.76 | y6 (0.09)                                         |
| 671.535  | 23.90 <sub>3</sub>  | 6.42  |                                                   |
| 729.453  | 41.29 <sub>3</sub>  | 11.10 |                                                   |
| 738.509  | 14.32 <sub>3</sub>  | 3.84  |                                                   |
| 747.408  | 49.79 <sub>3</sub>  | 13.38 | b8-98 (-0.02)                                     |
| 748.471  | 33.49 <sub>3</sub>  | 9.00  |                                                   |
| 771.487  | 67.69 <sub>3</sub>  | 18.19 | y7 (0.07)                                         |
| 795.562  | 10.63 <sub>3</sub>  | 2.85  |                                                   |
| 842.522  | 20.93 <sub>3</sub>  | 5.62  | y8 (0.07)                                         |
| 855.101  | 20.57 <sub>3</sub>  | 5.53  | b16[2+] (0.22) : y16*[2+] (0.17) : z16[2+] (0.17) |
| 863.680  | 371.96 <sub>3</sub> | 100   | c16[2+] (0.28) : y16[2+] (0.23)                   |
| 864.483  | 100.05 <sub>3</sub> | 26.89 |                                                   |
| 878.431  | 53.24 <sub>3</sub>  | 14.31 | b9-98 (-0.04)                                     |
| 879.483  | 22.21 <sub>3</sub>  | 5.97  |                                                   |
| 898.608  | 21.17 <sub>3</sub>  | 5.69  | y17*[2+] (0.16) : z17[2+] (0.16)                  |
| 955.242  | 56.75 <sub>3</sub>  | 15.25 | y18*[2+] (0.25) : z18[2+] (0.25)                  |
| 958.552  | 16.33 <sub>3</sub>  | 4.39  | b9o (0.10)                                        |
| 963.730  | 23.08 <sub>3</sub>  | 6.20  | y18[2+] (0.23)                                    |
| 985.962  | 19.13 <sub>3</sub>  | 5.14  |                                                   |
| 993.544  | 46.73 <sub>3</sub>  | 12.56 | b19o[2+] (0.09) : c9 (0.05) : b19*[2+] (-0.39)    |
| 996.261  | 23.82 <sub>3</sub>  | 6.40  | y10o (-0.25)                                      |
| 1012.957 | 29.96 <sub>3</sub>  | 8.05  |                                                   |
| 1017.717 | 39.80 <sub>3</sub>  | 10.70 |                                                   |
| 1058.262 | 18.96 <sub>3</sub>  | 5.09  |                                                   |
| 1097.650 | 9.09 <sub>3</sub>   | 2.44  |                                                   |
| 1107.263 | 4.69 <sub>3</sub>   | 1.26  |                                                   |
| 1140.762 | 7.61 <sub>3</sub>   | 2.04  |                                                   |
| 1157.253 | 7.33 <sub>3</sub>   | 1.97  | y11* (-0.28) : z11 (-0.28)                        |
| 1174.841 | 48.99 <sub>3</sub>  | 13.17 | y11 (0.28)                                        |
| 1176.688 | 25.14 <sub>3</sub>  | 6.75  |                                                   |
| 1210.558 | 33.61 <sub>3</sub>  | 9.03  | b12-98 (-0.02)                                    |
| 1281.651 | 37.25 <sub>3</sub>  | 10.01 | b13-98 (0.02)                                     |
| 1282.710 | 13.67 <sub>3</sub>  | 3.67  |                                                   |
| 1288.633 | 26.76 <sub>3</sub>  | 7.19  | y12* (0.05) : z12 (0.05)                          |
| 1289.518 | 19.05 <sub>3</sub>  | 5.12  |                                                   |
| 1305.616 | 127.22 <sub>3</sub> | 34.20 | y12 (0.01)                                        |
| 1363.520 | 7.13 <sub>3</sub>   | 1.91  |                                                   |
| 1365.749 | 23.00 <sub>3</sub>  | 6.18  |                                                   |
| 1382.848 | 33.01 <sub>3</sub>  | 8.87  | b14-98 (0.17)                                     |
| 1383.798 | 14.71 <sub>3</sub>  | 3.95  |                                                   |

|          |                    |       |                                  |
|----------|--------------------|-------|----------------------------------|
| 1384.511 | 9.66 <sub>,</sub>  | 2.59  |                                  |
| 1418.613 | 19.02 <sub>,</sub> | 5.11  | y13 (-0.07)                      |
| 1462.603 | 39.61 <sub>,</sub> | 10.64 | b14o (-0.04)                     |
| 1480.351 | 4.44 <sub>,</sub>  | 1.19  | b14 (-0.30)                      |
| 1481.739 | 19.27 <sub>,</sub> | 5.18  |                                  |
| 1596.179 | 9.88 <sub>,</sub>  | 2.65  |                                  |
| 1610.746 | 17.59 <sub>,</sub> | 4.72  | b16-98 (-0.01) : y15o<br>(-0.06) |
| 1628.758 | 10.41 <sub>,</sub> | 2.79  | y15 (-0.06)                      |
| 1629.869 | 31.27 <sub>,</sub> | 8.40  |                                  |
| 1630.931 | 9.64 <sub>,</sub>  | 2.59  |                                  |
| 1666.030 | 8.90 <sub>,</sub>  | 2.39  |                                  |
| 1688.994 | 4.29 <sub>,</sub>  | 1.15  |                                  |
| 1709.877 | 5.20 <sub>,</sub>  | 1.39  |                                  |
| 1710.856 | 12.86 <sub>,</sub> | 3.45  |                                  |
| 1726.004 | 7.33 <sub>,</sub>  | 1.97  | c16 (0.22) : y16 (0.12)          |
| 1727.451 | 14.13 <sub>,</sub> | 3.79  |                                  |
| 1778.799 | 8.78 <sub>,</sub>  | 2.36  |                                  |
| 1824.782 | 11.88 <sub>,</sub> | 3.19  |                                  |
| 1852.735 | 15.12 <sub>,</sub> | 4.06  |                                  |
| 1889.671 | 16.04 <sub>,</sub> | 4.31  | b18* (-0.15)                     |
| 1906.964 | 8.05               | 2.16  | b18 (0.11)                       |

**S1073**

# ProPhosSI MS/MS report

Mass: 1075.506824 Charge: 2+

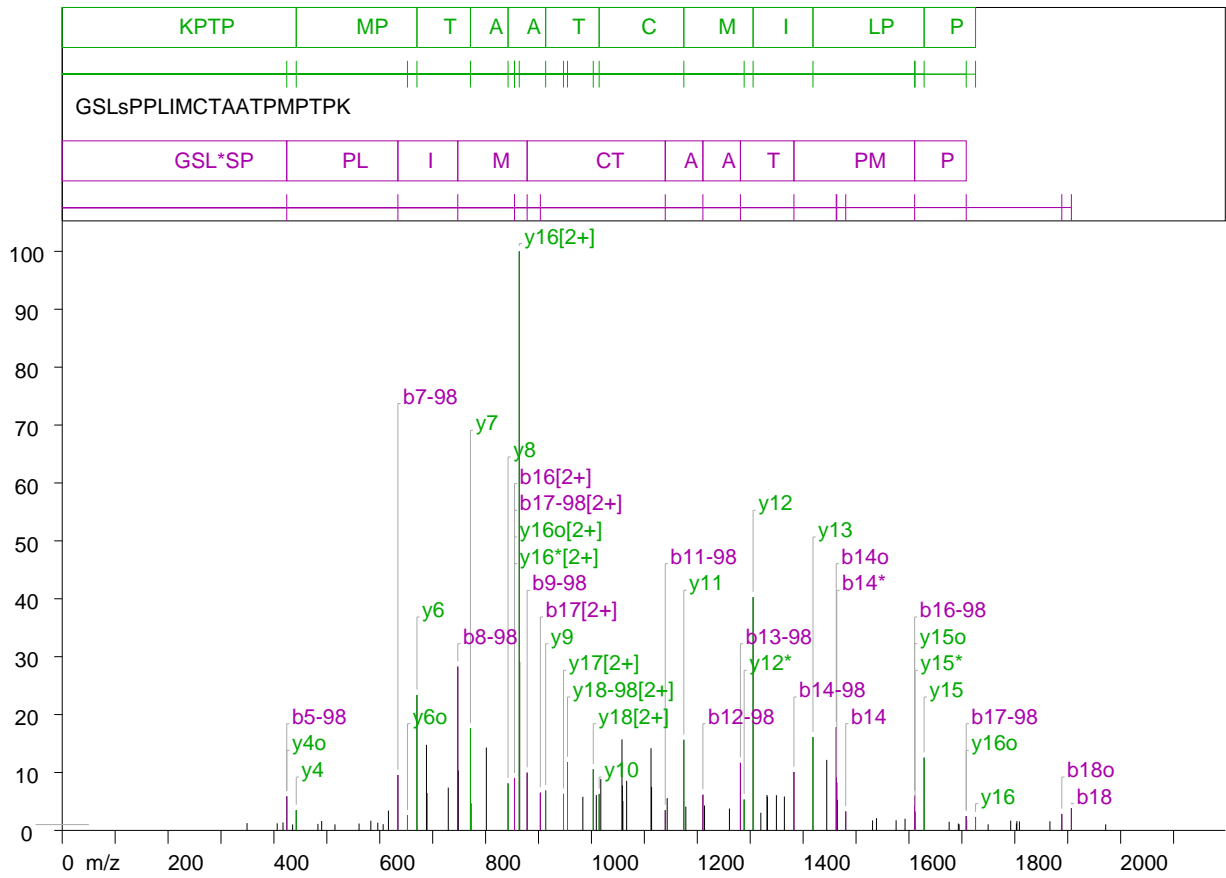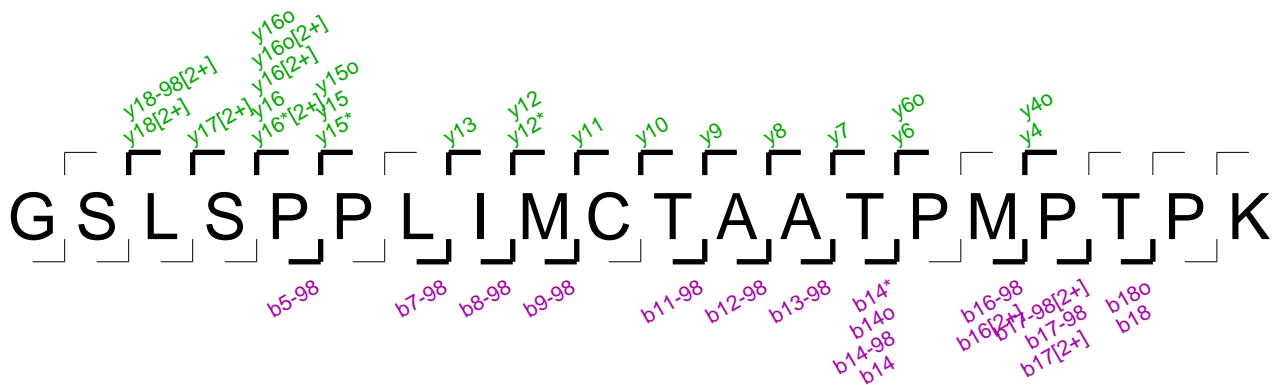

## Cav3.2 human

(56) 1070 ~GSLsPPLIMCTAATPMPTPK 1089 2149.002 (-0.0043) Da

|                         |     |
|-------------------------|-----|
| Parent Ion              | m/z |
| No parent ions observed |     |

## Modifications and supporting evidence

| Position | Residue ID | Modification | Evidence             |
|----------|------------|--------------|----------------------|
| 4        | (1073)     | Phospho (ST) | y16[2+] =>y18-98[2+] |

## Spectrum interpretation

| Rule                                   | passed/tests | Description                                                                                                                                                                                                                                                                                                                                                                                                                                                                                                                                                                                              |
|----------------------------------------|--------------|----------------------------------------------------------------------------------------------------------------------------------------------------------------------------------------------------------------------------------------------------------------------------------------------------------------------------------------------------------------------------------------------------------------------------------------------------------------------------------------------------------------------------------------------------------------------------------------------------------|
| Parent ions present                    | 0/1          | Parent ions corresponding to the parent fragment - 1 phosphate ions were not found                                                                                                                                                                                                                                                                                                                                                                                                                                                                                                                       |
| Three -98 Ions present                 | 1/1          | 11 des-phospho fragment ions were found.                                                                                                                                                                                                                                                                                                                                                                                                                                                                                                                                                                 |
| Unique -98 transitions present         | 1/1          | transition y16[2+] to y18-98[2+] support unique phosphorylation at position 4<br><br/>                                                                                                                                                                                                                                                                                                                                                                                                                                                                                                                   |
| Four Sequential b or y ions            | 1/1          | Sequence of four b ions found from b11-98 to b14-98.<br>Sequence of four y ions found from y6 to y9.                                                                                                                                                                                                                                                                                                                                                                                                                                                                                                     |
| Five of six sequential ions present    | 1/1          | Five of Six ions found between b7 and b12<br>Five of Six ions found between b8 and b13<br>Five of Six ions found between b9 and b14<br>Five of Six ions found between b11 and b16<br>Five of Six ions found between b12 and b17<br>Five of Six ions found between y4 and y9<br>Five of Six ions found between y5 and y10<br>Five of Six ions found between y6 and y11<br>Five of Six ions found between y7 and y12<br>Five of Six ions found between y8 and y13<br>Five of Six ions found between y9 and y14<br>Five of Six ions found between y10 and y15<br>Five of Six ions found between y11 and y16 |
| Proline directed fragmentation pattern | 6/8          | NOTE: S-P is a low abundance fragmentation.<br>PASS: y16> y15 with ratio 7.95<br/><br>FAIL: b5-98> b4-98<br/>NOTE: P-P is a low abundance fragmentation.<br>PASS: y15> y14<br/><br>PASS: b6-98< b5-98<br/><br>PASS: y6> y5<br/><br>PASS: b15-98< b14-98<br/><br>PASS: y4> y3<br/><br>FAIL: b17-98> b16-98<br/>No proline ions at y2<br>No proline ions at b19-98<br/>                                                                                                                                                                                                                                    |

|                                    |     |                                                                                                                                                                                                                                                                                                                                                                                                                                                                                                                                                                                                                                        |
|------------------------------------|-----|----------------------------------------------------------------------------------------------------------------------------------------------------------------------------------------------------------------------------------------------------------------------------------------------------------------------------------------------------------------------------------------------------------------------------------------------------------------------------------------------------------------------------------------------------------------------------------------------------------------------------------------|
| PhosphoTyrosine transition present | 0/0 | 0 of 0 phosphotyrosine transitions were found.                                                                                                                                                                                                                                                                                                                                                                                                                                                                                                                                                                                         |
| Six of top ten ions identified     | 8/6 | ion 1 (mass: 863.609: intensity: 2898.35) assigned 2 times<br>ion 2 (mass: 1305.457: intensity: 1167.39) assigned 1 times<br>ion 3 (mass: 864.385: intensity: 843.04) assigned 0 times<br>ion 4 (mass: 747.447: intensity: 820.08) assigned 1 times<br>ion 5 (mass: 670.290: intensity: 677.85) assigned 1 times<br>ion 6 (mass: 1462.573: intensity: 516.83) assigned 1 times<br>ion 7 (mass: 771.350: intensity: 510.80) assigned 1 times<br>ion 8 (mass: 1418.591: intensity: 466.87) assigned 1 times<br>ion 9 (mass: 1057.718: intensity: 455.73) assigned 0 times<br>ion 10 (mass: 1174.564: intensity: 453.40) assigned 1 times |

## Ion Table

36 ions assigned of 65 ions above threshold (55%).

N-terminal ions

| AA | N-ion | b                             | b*                       | b-98                                           | bo                        |
|----|-------|-------------------------------|--------------------------|------------------------------------------------|---------------------------|
| G  | 1     | 58.029                        | 41.002                   | -                                              | 40.018                    |
| S  | 2     | 145.061                       | 128.034                  | -                                              | 127.050                   |
| L  | 3     | 258.145                       | 241.118                  | -                                              | 240.134                   |
| s  | 4     | 425.143                       | 408.117                  | 327.157                                        | 407.133                   |
| P  | 5     | 522.196                       | 505.169                  | 424.210<br>*424.246 (5)                        | 504.185                   |
| P  | 6     | 619.249                       | 602.222                  | 521.263                                        | 601.238                   |
| L  | 7     | 732.333                       | 715.306                  | 634.347<br>634.301 (9)                         | 714.322                   |
| I  | 8     | 845.417                       | 828.390                  | 747.431<br>747.447 (28)                        | 827.406                   |
| M  | 9     | 976.457                       | 959.431                  | 878.471<br>878.522 (9)                         | 958.447                   |
| C  | 10    | 1136.488                      | 1119.461                 | 1038.502                                       | 1118.477                  |
| T  | 11    | 1237.536                      | 1220.509                 | 1139.550<br>1139.511 (3)                       | 1219.525                  |
| A  | 12    | 1308.573                      | 1291.546                 | 1210.587<br>1210.609 (6)                       | 1290.562                  |
| A  | 13    | 1379.610                      | 1362.583                 | 1281.624<br>1281.538 (11)                      | 1361.599                  |
| T  | 14    | 1480.658<br>1480.515 (3)      | 1463.631<br>1463.561 (8) | 1382.672<br>1382.636 (10)                      | 1462.647<br>1462.573 (17) |
| P  | 15    | 1577.710                      | 1560.684                 | 1479.725                                       | 1559.700                  |
| M  | 16    | 1708.751<br>*854.641 [2+] (9) | 1691.724                 | 1610.765<br>*1610.693 (5)                      | 1690.740                  |
| P  | 17    | 1805.804<br>903.450 [2+] (6)  | 1788.777                 | 1707.818<br>*854.641 [2+] (9)<br>*1708.203 (2) | 1787.793                  |
| T  | 18    | 1906.851<br>1906.861 (3)      | 1889.825                 | 1808.865                                       | 1888.841<br>1888.767 (2)  |
| P  | 19    | 2003.904                      | 1986.878                 | 1905.918                                       | 1985.894                  |
| K  | 20    | -                             | -                        | -                                              | -                         |



## C-terminal ions

| AA | C-ion | y                                                | y*                            | y-98                          | yo                                             |
|----|-------|--------------------------------------------------|-------------------------------|-------------------------------|------------------------------------------------|
| G  | 20    | -                                                | -                             | -                             | -                                              |
| S  | 19    | 2092.988                                         | 2075.962                      | 1995.002                      | 2074.978                                       |
| L  | 18    | 2005.956<br>1003.474 [2+] (10)                   | 1988.930                      | 1907.970<br>954.763 [2+] (11) | 1987.946                                       |
| s  | 17    | 1892.872<br>947.197 [2+] (6)                     | 1875.846                      | 1794.886                      | 1874.862                                       |
| P  | 16    | 1725.874<br>*1725.819 (2)<br>*863.609 [2+] (100) | 1708.847<br>*854.641 [2+] (9) | -                             | 1707.863<br>*854.641 [2+] (9)<br>*1708.203 (2) |
| P  | 15    | 1628.821<br>1628.641 (12)                        | 1611.794<br>*1611.561 (3)     | -                             | 1610.810<br>*1610.693 (5)                      |
| L  | 14    | 1531.768                                         | 1514.742                      | -                             | 1513.758                                       |
| I  | 13    | 1418.684<br>1418.591 (16)                        | 1401.658                      | -                             | 1400.674                                       |
| M  | 12    | 1305.600<br>1305.457 (40)                        | 1288.574<br>*1288.583 (5)     | -                             | 1287.590                                       |
| C  | 11    | 1174.560<br>1174.564 (15)                        | 1157.533                      | -                             | 1156.549                                       |
| T  | 10    | 1014.529<br>1014.588 (6)                         | 997.502                       | -                             | 996.518                                        |
| A  | 9     | 913.481<br>913.504 (6)                           | 896.455                       | -                             | 895.471                                        |
| A  | 8     | 842.444<br>842.420 (8)                           | 825.418                       | -                             | 824.434                                        |
| T  | 7     | 771.407<br>771.350 (17)                          | 754.380                       | -                             | 753.396                                        |
| P  | 6     | 670.359<br>670.290 (23)                          | 653.333                       | -                             | 652.349<br>652.387 (2)                         |
| M  | 5     | 573.307                                          | 556.280                       | -                             | 555.296                                        |
| P  | 4     | 442.266<br>*442.231 (3)                          | 425.240                       | -                             | 424.256<br>*424.246 (5)                        |
| T  | 3     | 345.213                                          | 328.187                       | -                             | 327.203                                        |
| P  | 2     | 244.166                                          | 227.139                       | -                             | 226.155                                        |
| K  | 1     | 147.113                                          | 130.086                       | -                             | 129.102                                        |

## Ion distribution

| Threshold | Ion count | Matches | % matched |
|-----------|-----------|---------|-----------|
| 0         | 98        | 43      | 43        |
| 0.5       | 97        | 42      | 43        |
| 1         | 89        | 41      | 46        |
| 2         | 65        | 36      | 55        |
| 3         | 59        | 32      | 54        |
| 4         | 51        | 27      | 52        |
| 5         | 48        | 27      | 56        |
| 10        | 20        | 13      | 65        |

## Observed ions > 1%

| m/z     | Intensity | % max | Assignment (delta) |
|---------|-----------|-------|--------------------|
| 349.232 | 36.48,    | 1.25  | x6[2+] (-0.44)     |

|          |          |       |                                                                                                  |
|----------|----------|-------|--------------------------------------------------------------------------------------------------|
| 406.244  | 35.18,   | 1.21  |                                                                                                  |
| 417.215  | 39.93,   | 1.37  |                                                                                                  |
| 424.246  | 170.11,  | 5.86  | b5-98 (0.03) : y4o (-0.01)                                                                       |
| 435.419  | 29.92,   | 1.03  | x8[2+] (-0.30)                                                                                   |
| 442.231  | 101.81,  | 3.51  | c4 (0.06) : y4 (-0.03)                                                                           |
| 483.207  | 32.68,   | 1.12  |                                                                                                  |
| 490.248  | 46.94,   | 1.61  |                                                                                                  |
| 515.347  | 30.25,   | 1.04  |                                                                                                  |
| 560.881  | 34.32,   | 1.18  |                                                                                                  |
| 583.142  | 48.55,   | 1.67  |                                                                                                  |
| 596.280  | 38.42,   | 1.32  | a11o[2+] (0.01) : a11*[2+] (-0.48)                                                               |
| 606.388  | 31.19,   | 1.07  |                                                                                                  |
| 616.413  | 99.21,   | 3.42  |                                                                                                  |
| 634.301  | 277.09,  | 9.56  | b7-98 (-0.04)                                                                                    |
| 652.387  | 75.33,   | 2.59  | y6o (0.03)                                                                                       |
| 670.290  | 677.85,  | 23.38 | y6 (-0.06)                                                                                       |
| 688.283  | 428.27,  | 14.77 |                                                                                                  |
| 689.325  | 186.58,  | 6.43  |                                                                                                  |
| 729.495  | 214.15,  | 7.38  |                                                                                                  |
| 747.447  | 820.08,  | 28.29 | b8-98 (0.01)                                                                                     |
| 748.512  | 300.06,  | 10.35 |                                                                                                  |
| 771.350  | 510.80,  | 17.62 | y7 (-0.05)                                                                                       |
| 772.521  | 135.59,  | 4.67  |                                                                                                  |
| 801.405  | 414.95,  | 14.31 |                                                                                                  |
| 842.420  | 235.52,  | 8.12  | y8 (-0.02)                                                                                       |
| 854.641  | 262.42,  | 9.05  | b17-98[2+] (0.22) :<br>y16o[2+] (0.20) : b16[2+] (-0.23) :<br>y16*[2+] (-0.28) : z16[2+] (-0.28) |
| 863.609  | 2898.35, | 100   | c16[2+] (0.21) : y16[2+] (0.16)                                                                  |
| 864.385  | 843.04,  | 29.08 |                                                                                                  |
| 878.522  | 289.05,  | 9.97  | b9-98 (0.05)                                                                                     |
| 903.450  | 188.81,  | 6.51  | b17[2+] (0.04)                                                                                   |
| 913.504  | 199.81,  | 6.89  | y9 (0.02)                                                                                        |
| 947.197  | 182.98,  | 6.31  | y17[2+] (0.25)                                                                                   |
| 954.763  | 341.92,  | 11.79 | y18-98[2+] (0.27)                                                                                |
| 983.764  | 168.31,  | 5.80  |                                                                                                  |
| 1003.474 | 306.09,  | 10.56 | y18[2+] (-0.00)                                                                                  |
| 1009.213 | 176.45,  | 6.08  |                                                                                                  |
| 1014.588 | 182.43,  | 6.29  | y10 (0.05)                                                                                       |
| 1017.689 | 257.74,  | 8.89  | x18[2+] (0.20)                                                                                   |
| 1057.718 | 455.73,  | 15.72 |                                                                                                  |
| 1058.485 | 224.86,  | 7.75  |                                                                                                  |

|          |                      |       |                                       |
|----------|----------------------|-------|---------------------------------------|
| 1059.336 | 146.99 <sub>3</sub>  | 5.07  |                                       |
| 1066.490 | 248.14 <sub>3</sub>  | 8.56  |                                       |
| 1112.565 | 411.09 <sub>3</sub>  | 14.18 |                                       |
| 1113.639 | 217.79 <sub>3</sub>  | 7.51  |                                       |
| 1139.511 | 101.41 <sub>3</sub>  | 3.49  | b11-98 (-0.03)                        |
| 1143.143 | 161.46 <sub>3</sub>  | 5.57  |                                       |
| 1174.564 | 453.40 <sub>3</sub>  | 15.64 | y11 (0.00)                            |
| 1178.326 | 118.95 <sub>3</sub>  | 4.10  |                                       |
| 1210.609 | 178.68 <sub>3</sub>  | 6.16  | b12-98 (0.02)                         |
| 1213.670 | 124.50 <sub>3</sub>  | 4.29  |                                       |
| 1260.741 | 109.40 <sub>3</sub>  | 3.77  |                                       |
| 1281.538 | 338.21 <sub>3</sub>  | 11.66 | b13-98 (-0.08)                        |
| 1288.583 | 155.07 <sub>3</sub>  | 5.35  | y12* (0.00) : z12 (0.00)              |
| 1305.457 | 1167.39 <sub>3</sub> | 40.27 | y12 (-0.14)                           |
| 1320.098 | 88.45 <sub>3</sub>   | 3.05  |                                       |
| 1331.726 | 177.34 <sub>3</sub>  | 6.11  |                                       |
| 1332.586 | 168.61 <sub>3</sub>  | 5.81  |                                       |
| 1349.509 | 176.24 <sub>3</sub>  | 6.08  |                                       |
| 1364.593 | 169.61 <sub>3</sub>  | 5.85  |                                       |
| 1382.636 | 292.52 <sub>3</sub>  | 10.09 | b14-98 (-0.03)                        |
| 1418.591 | 466.87 <sub>3</sub>  | 16.10 | y13 (-0.09)                           |
| 1444.630 | 352.92 <sub>3</sub>  | 12.17 |                                       |
| 1462.573 | 516.83 <sub>3</sub>  | 17.83 | b14o (-0.07)                          |
| 1463.561 | 239.82 <sub>3</sub>  | 8.27  | b14* (-0.07)                          |
| 1464.736 | 153.18 <sub>3</sub>  | 5.28  |                                       |
| 1480.515 | 94.90 <sub>3</sub>   | 3.27  | b14 (-0.14)                           |
| 1531.205 | 50.07 <sub>3</sub>   | 1.72  |                                       |
| 1538.566 | 61.39 <sub>3</sub>   | 2.11  |                                       |
| 1575.700 | 50.50 <sub>3</sub>   | 1.74  |                                       |
| 1592.596 | 58.30 <sub>3</sub>   | 2.01  |                                       |
| 1610.693 | 173.32 <sub>3</sub>  | 5.97  | b16-98 (-0.07) : y15o (-0.11)         |
| 1611.561 | 93.90 <sub>3</sub>   | 3.23  | y15* (-0.23) : z15 (-0.23)            |
| 1628.641 | 364.34 <sub>3</sub>  | 12.57 | y15 (-0.18)                           |
| 1675.956 | 43.14 <sub>3</sub>   | 1.48  |                                       |
| 1693.308 | 34.34 <sub>3</sub>   | 1.18  |                                       |
| 1694.806 | 30.39 <sub>3</sub>   | 1.04  |                                       |
| 1708.203 | 71.93 <sub>3</sub>   | 2.48  | b17-98 (0.38) : y16o (0.33)           |
| 1709.067 | 52.25 <sub>3</sub>   | 1.80  | b16 (0.31) : y16* (0.21) : z16 (0.21) |
| 1725.819 | 66.18 <sub>3</sub>   | 2.28  | c16 (0.04) : y16 (-0.05)              |
| 1749.593 | 30.43 <sub>3</sub>   | 1.04  |                                       |
| 1792.236 | 48.72 <sub>3</sub>   | 1.68  |                                       |
| 1802.996 | 34.92 <sub>3</sub>   | 1.20  |                                       |

|          |         |      |                |
|----------|---------|------|----------------|
| 1803.908 | 46.69,  | 1.61 |                |
| 1808.710 | 44.37,  | 1.53 | b18-98 (-0.15) |
| 1866.377 | 45.53,  | 1.57 |                |
| 1888.767 | 82.24,  | 2.83 | b18o (-0.07)   |
| 1906.861 | 111.88, | 3.86 | b18 (0.00)     |
| 1971.760 | 30.50,  | 1.05 |                |

**S1090 or**

**S1091**

# ProPhosSI MS/MS report

Mass: 820.370345 Charge: 2+

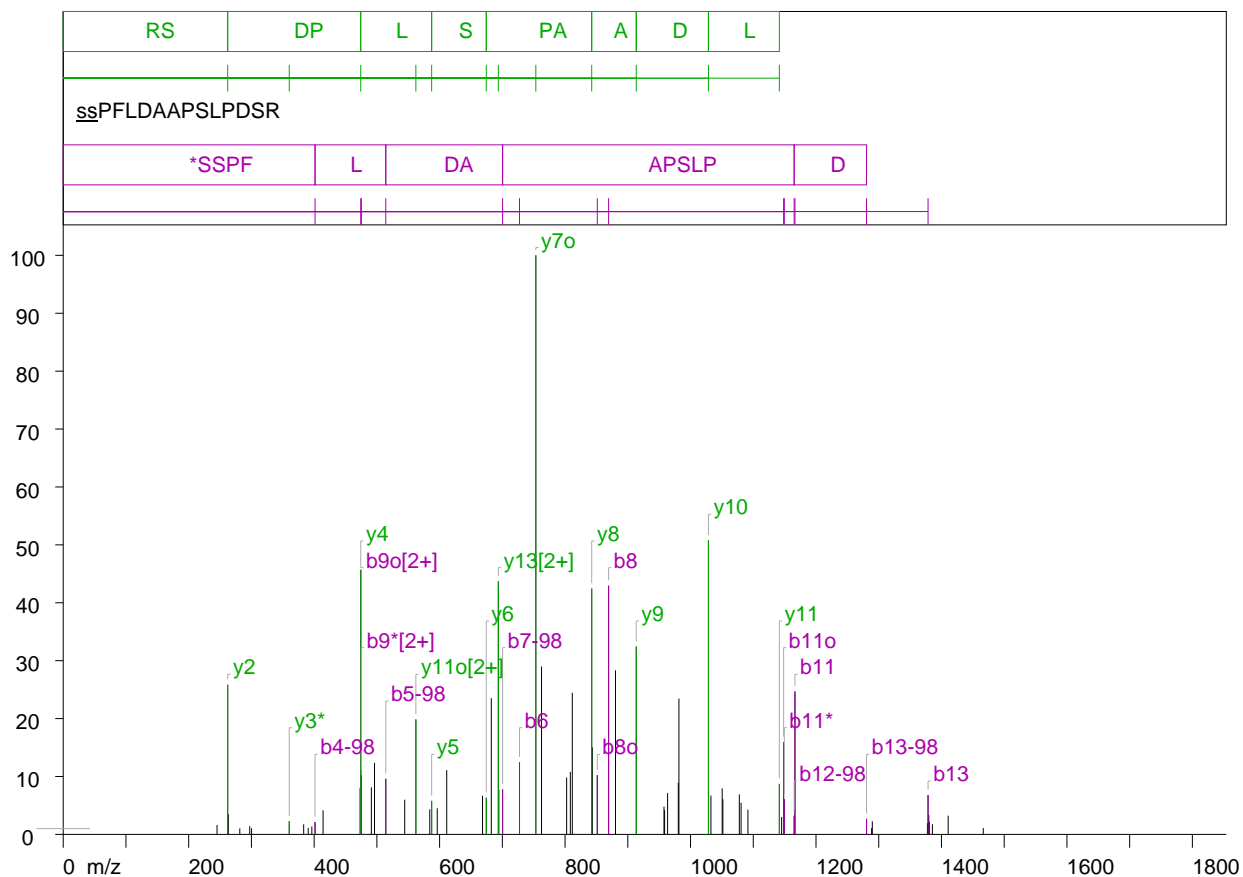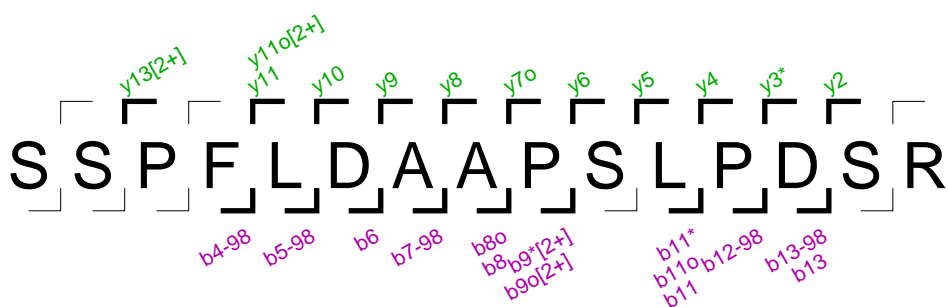

## Cav3.2 human

(42) 1090 ssPFLDAAPSLPDSR 1104 1638.729 (-0.0040) Da

|                         |     |
|-------------------------|-----|
| Parent Ion              | m/z |
| No parent ions observed |     |

### Modifications and supporting evidence

| Position | Residue ID     | Modification | Evidence                     |
|----------|----------------|--------------|------------------------------|
| 1 or 2   | (1090 or 1091) | Phospho (ST) | all the b ions from b4 to b9 |

### Spectrum interpretation

| Rule                                   | passed/tests | Description                                                                                                                                                                                                                                                                                                                                                                                                                                                                                                                                                                                                                                |
|----------------------------------------|--------------|--------------------------------------------------------------------------------------------------------------------------------------------------------------------------------------------------------------------------------------------------------------------------------------------------------------------------------------------------------------------------------------------------------------------------------------------------------------------------------------------------------------------------------------------------------------------------------------------------------------------------------------------|
| Parent ions present                    | 0/1          | Parent ions corresponding to the parent fragment - 1 phosphate ions were not found                                                                                                                                                                                                                                                                                                                                                                                                                                                                                                                                                         |
| Three -98 Ions present                 | 1/1          | 5 des-phospho fragment ions were found.                                                                                                                                                                                                                                                                                                                                                                                                                                                                                                                                                                                                    |
| Unique -98 transitions present         | 0/1          | No transitions found to support unique phosphorylation at position 1<br><br/>                                                                                                                                                                                                                                                                                                                                                                                                                                                                                                                                                              |
| Four Sequential b or y ions            | 1/1          | Sequence of four y ions found from y8 to y11.                                                                                                                                                                                                                                                                                                                                                                                                                                                                                                                                                                                              |
| Five of six sequential ions present    | 1/1          | Five of Six ions found between y4 and y9<br>Five of Six ions found between y5 and y10<br>Five of Six ions found between y6 and y11<br>Five of Six ions found between y8 and y13                                                                                                                                                                                                                                                                                                                                                                                                                                                            |
| Proline directed fragmentation pattern | 2/4          | NOTE: S-P is a low abundance fragmentation.<br>PASS: y13> y12<br/><br>No proline ions at b3-98<br/><br>FAIL: y7< y6<br/>No proline ions at b9-98<br/><br>PASS: y4> y3<br/><br>FAIL: b12-98> b11-98<br/>                                                                                                                                                                                                                                                                                                                                                                                                                                    |
| PhosphoTyrosine transition present     | 0/0          | 0 of 0 phosphotyrosine transitions were found.                                                                                                                                                                                                                                                                                                                                                                                                                                                                                                                                                                                             |
| Six of top ten ions identified         | 8/6          | ion 1 (mass: 753.378: intensity: 4448.10) assigned 2 times<br>ion 2 (mass: 1028.515: intensity: 2259.08) assigned 1 times<br>ion 3 (mass: 474.263: intensity: 2032.17) assigned 2 times<br>ion 4 (mass: 693.595: intensity: 1944.31) assigned 1 times<br>ion 5 (mass: 869.357: intensity: 1910.45) assigned 1 times<br>ion 6 (mass: 842.474: intensity: 1888.53) assigned 1 times<br>ion 7 (mass: 913.483: intensity: 1443.23) assigned 1 times<br>ion 8 (mass: 762.495: intensity: 1290.13) assigned 0 times<br>ion 9 (mass: 880.408: intensity: 1259.92) assigned 0 times<br>ion 10 (mass: 262.171: intensity: 1149.65) assigned 1 times |

## Ion Table

27 ions assigned of 59 ions above threshold (45%).

### N-terminal ions

| AA | N-ion | b                         | b*                           | b-98                      | bo                            |
|----|-------|---------------------------|------------------------------|---------------------------|-------------------------------|
| s  | 1     | 168.006                   | 150.979                      | 70.020                    | 149.995                       |
| S  | 2     | 255.038                   | 238.011                      | 157.052                   | 237.027                       |
| P  | 3     | 352.090                   | 335.064                      | 254.105                   | 334.080                       |
| F  | 4     | 499.159                   | 482.132                      | 401.173<br>401.419 (2)    | 481.148                       |
| L  | 5     | 612.243                   | 595.216                      | 514.257<br>514.166 (9)    | 594.232                       |
| D  | 6     | 727.270<br>727.344 (12)   | 710.243                      | 629.284                   | 709.259                       |
| A  | 7     | 798.307                   | 781.280                      | 700.321<br>700.423 (7)    | 780.296                       |
| A  | 8     | 869.344<br>869.357 (42)   | 852.318                      | 771.358                   | 851.334<br>851.363 (10)       |
| P  | 9     | 966.397                   | 949.370<br>475.258 [2+] (10) | 868.411                   | 948.386<br>*474.263 [2+] (45) |
| S  | 10    | 1053.429                  | 1036.402                     | 955.443                   | 1035.418                      |
| L  | 11    | 1166.513<br>1166.452 (24) | 1149.486<br>1149.499 (6)     | 1068.527                  | 1148.502<br>1148.371 (15)     |
| P  | 12    | 1263.566                  | 1246.539                     | 1165.580<br>1165.174 (3)  | 1245.555                      |
| D  | 13    | 1378.593<br>1378.631 (6)  | 1361.566                     | 1280.607<br>*1280.573 (2) | 1360.582                      |
| S  | 14    | 1465.625                  | 1448.598                     | 1367.639                  | 1447.614                      |
| R  | 15    | -                         | -                            | -                         | -                             |

### C-terminal ions

| AA | C-ion | y                             | y*                      | yo                            |
|----|-------|-------------------------------|-------------------------|-------------------------------|
| s  | 15    | -                             | -                       | -                             |
| S  | 14    | 1472.738                      | 1455.712                | 1454.728                      |
| P  | 13    | 1385.706<br>693.595 [2+] (43) | 1368.680                | 1367.696                      |
| F  | 12    | 1288.653                      | 1271.627                | 1270.643                      |
| L  | 11    | 1141.585<br>1141.582 (8)      | 1124.558                | 1123.574<br>562.145 [2+] (19) |
| D  | 10    | 1028.501<br>1028.515 (50)     | 1011.474                | 1010.490                      |
| A  | 9     | 913.474<br>913.483 (32)       | 896.447                 | 895.463                       |
| A  | 8     | 842.437<br>842.474 (42)       | 825.410                 | 824.426                       |
| P  | 7     | 771.400                       | 754.373                 | 753.389<br>*753.378 (100)     |
| S  | 6     | 674.347<br>674.370 (6)        | 657.320                 | 656.336                       |
| L  | 5     | 587.315<br>587.303 (5)        | 570.288                 | 569.304                       |
| P  | 4     | 474.231<br>*474.263 (45)      | 457.204                 | 456.220                       |
| D  | 3     | 377.178                       | 360.151<br>*360.309 (2) | 359.167                       |
| S  | 2     | 262.151<br>262.171 (25)       | 245.124                 | 244.140                       |



|   |   |         |         |         |
|---|---|---------|---------|---------|
| R | 1 | 175.119 | 158.092 | 157.108 |
|---|---|---------|---------|---------|

### Ion distribution

| Threshold | Ion count | Matches | % matched |
|-----------|-----------|---------|-----------|
| 0         | 85        | 34      | 40        |
| 0.5       | 78        | 34      | 43        |
| 1         | 70        | 32      | 45        |
| 2         | 59        | 27      | 45        |
| 3         | 54        | 24      | 44        |
| 4         | 49        | 23      | 46        |
| 5         | 43        | 22      | 51        |
| 10        | 23        | 15      | 65        |

### Observed ions > 1%

| m/z     | Intensity            | % max | Assignment (delta)          |
|---------|----------------------|-------|-----------------------------|
| 245.188 | 72.19 <sub>,</sub>   | 1.62  | z2 (0.06) : y2* (0.06)      |
| 262.171 | 1149.65 <sub>,</sub> | 25.84 | y2 (0.01)                   |
| 263.223 | 155.51 <sub>,</sub>  | 3.49  |                             |
| 281.465 | 46.40 <sub>,</sub>   | 1.04  |                             |
| 297.284 | 63.23 <sub>,</sub>   | 1.42  | b5o[2+] (-0.33)             |
| 300.223 | 46.77 <sub>,</sub>   | 1.05  |                             |
| 360.309 | 101.32 <sub>,</sub>  | 2.27  | y3* (0.15) : z3 (0.15)      |
| 383.317 | 77.43 <sub>,</sub>   | 1.74  |                             |
| 390.531 | 50.53 <sub>,</sub>   | 1.13  | b7o[2+] (-0.12)             |
| 396.301 | 60.82 <sub>,</sub>   | 1.36  |                             |
| 401.419 | 94.77 <sub>,</sub>   | 2.13  | b4-98 (0.24)                |
| 414.205 | 184.76 <sub>,</sub>  | 4.15  |                             |
| 473.241 | 357.38 <sub>,</sub>  | 8.03  |                             |
| 474.263 | 2032.17 <sub>,</sub> | 45.68 | y4 (0.03) : b9o[2+] (-0.43) |
| 475.258 | 452.57 <sub>,</sub>  | 10.17 | b9*[2+] (0.06)              |
| 491.207 | 360.87 <sub>,</sub>  | 8.11  |                             |
| 496.217 | 549.27 <sub>,</sub>  | 12.34 |                             |
| 514.166 | 427.08 <sub>,</sub>  | 9.60  | b5-98 (-0.09)               |
| 544.348 | 266.79 <sub>,</sub>  | 5.99  |                             |
| 562.145 | 883.28 <sub>,</sub>  | 19.85 | y11o[2+] (-0.14)            |
| 584.301 | 192.65 <sub>,</sub>  | 4.33  | a5 (0.05)                   |
| 587.303 | 257.42 <sub>,</sub>  | 5.78  | y5 (-0.01)                  |
| 596.232 | 200.96 <sub>,</sub>  | 4.51  |                             |
| 611.317 | 493.06 <sub>,</sub>  | 11.08 |                             |
| 668.425 | 297.39 <sub>,</sub>  | 6.68  |                             |
| 674.370 | 282.41 <sub>,</sub>  | 6.34  | y6 (0.02)                   |
| 682.380 | 1046.73 <sub>,</sub> | 23.53 | a6* (0.13)                  |

|          |                      |       |                              |
|----------|----------------------|-------|------------------------------|
| 693.595  | 1944.31 <sub>3</sub> | 43.71 | y13[2+] (0.23)               |
| 694.401  | 344.34 <sub>3</sub>  | 7.74  |                              |
| 700.423  | 345.70 <sub>3</sub>  | 7.77  | b7-98 (0.10)                 |
| 727.344  | 554.14 <sub>3</sub>  | 12.45 | b6 (0.07)                    |
| 753.378  | 4448.10 <sub>3</sub> | 100   | a7* (0.09) : y7o (-0.01)     |
| 762.495  | 1290.13 <sub>3</sub> | 29.00 |                              |
| 802.504  | 436.06 <sub>3</sub>  | 9.80  |                              |
| 808.373  | 480.88 <sub>3</sub>  | 10.81 |                              |
| 811.522  | 1088.08 <sub>3</sub> | 24.46 |                              |
| 842.474  | 1888.53 <sub>3</sub> | 42.45 | y8 (0.03)                    |
| 843.407  | 668.76 <sub>3</sub>  | 15.03 |                              |
| 851.363  | 455.43 <sub>3</sub>  | 10.23 | b8o (0.02)                   |
| 869.357  | 1910.45 <sub>3</sub> | 42.94 | b8 (0.01)                    |
| 880.408  | 1259.92 <sub>3</sub> | 28.32 |                              |
| 913.483  | 1443.23 <sub>3</sub> | 32.44 | y9 (0.00)                    |
| 957.700  | 213.25 <sub>3</sub>  | 4.79  |                              |
| 958.673  | 186.04 <sub>3</sub>  | 4.18  |                              |
| 963.438  | 317.00 <sub>3</sub>  | 7.12  |                              |
| 980.463  | 396.05 <sub>3</sub>  | 8.90  |                              |
| 981.491  | 1043.78 <sub>3</sub> | 23.46 |                              |
| 1028.515 | 2259.08 <sub>3</sub> | 50.78 | y10 (0.01)                   |
| 1032.537 | 298.46 <sub>3</sub>  | 6.70  |                              |
| 1050.473 | 353.62 <sub>3</sub>  | 7.94  |                              |
| 1051.514 | 270.13 <sub>3</sub>  | 6.07  |                              |
| 1077.778 | 306.95 <sub>3</sub>  | 6.90  |                              |
| 1080.549 | 242.91 <sub>3</sub>  | 5.46  |                              |
| 1091.476 | 189.76 <sub>3</sub>  | 4.26  |                              |
| 1141.582 | 387.85 <sub>3</sub>  | 8.71  | y11 (-0.00)                  |
| 1145.253 | 134.39 <sub>3</sub>  | 3.02  |                              |
| 1148.371 | 709.10 <sub>3</sub>  | 15.94 | b11o (-0.13)                 |
| 1149.499 | 269.85 <sub>3</sub>  | 6.06  | b11* (0.01)                  |
| 1165.174 | 143.17 <sub>3</sub>  | 3.21  | b12-98 (-0.40)               |
| 1166.452 | 1097.86 <sub>3</sub> | 24.68 | b11 (-0.06)                  |
| 1280.573 | 119.73 <sub>3</sub>  | 2.69  | c12 (-0.01) : b13-98 (-0.03) |
| 1288.637 | 47.79 <sub>3</sub>   | 1.07  | y12 (-0.01)                  |
| 1289.775 | 100.96 <sub>3</sub>  | 2.26  |                              |
| 1377.618 | 85.60 <sub>3</sub>   | 1.92  |                              |
| 1378.631 | 302.57 <sub>3</sub>  | 6.80  | b13 (0.03)                   |
| 1379.751 | 149.71 <sub>3</sub>  | 3.36  |                              |
| 1380.551 | 97.95 <sub>3</sub>   | 2.20  |                              |
| 1385.505 | 78.45 <sub>3</sub>   | 1.76  | y13 (-0.20)                  |
| 1410.664 | 144.14 <sub>3</sub>  | 3.24  |                              |
| 1466.623 | 48.76 <sub>3</sub>   | 1.09  |                              |

**S1099**

# ProPhosSI MS/MS report

Mass: 820.370796 Charge: 2+

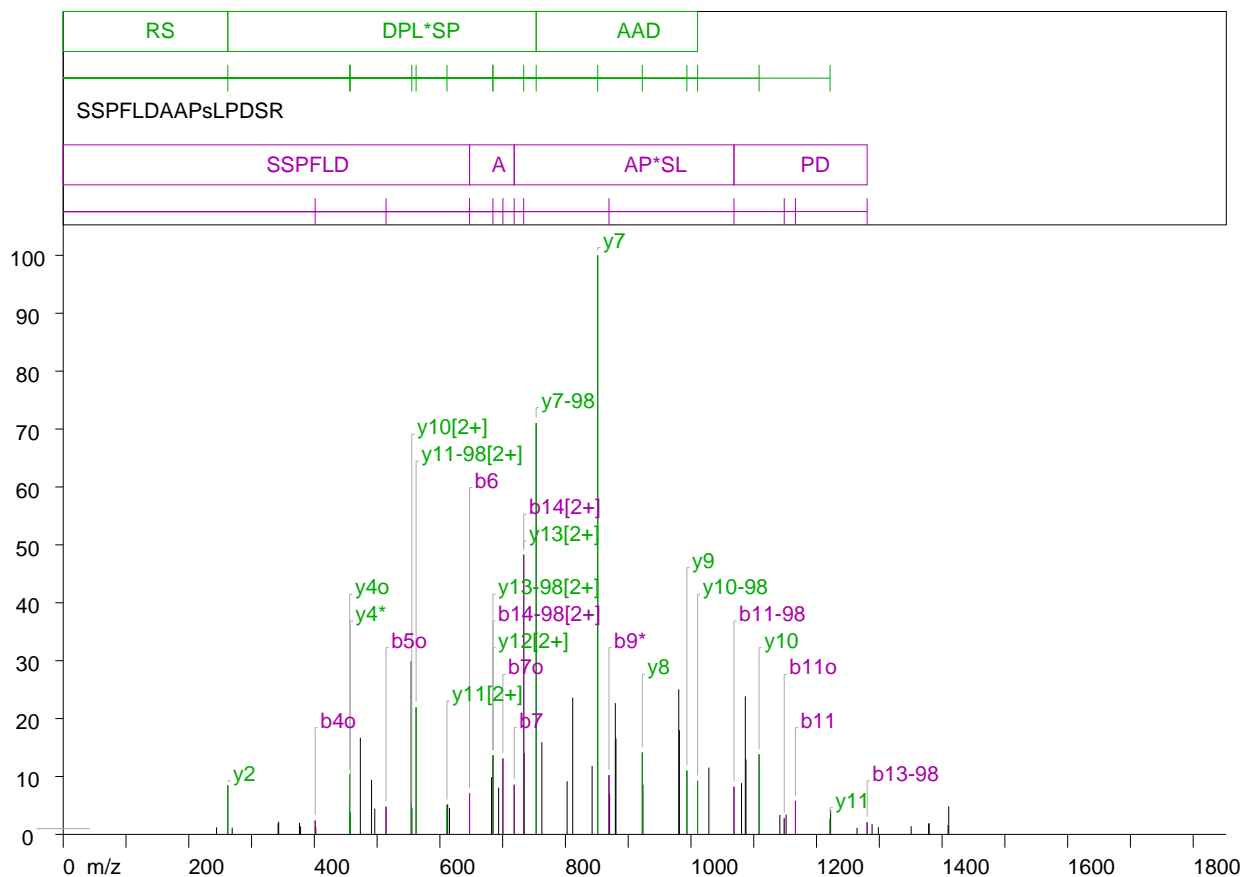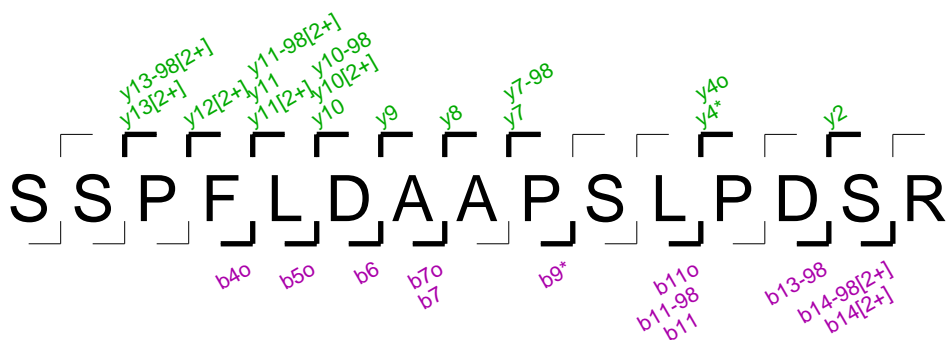

## Cav3.2 human

(38) 1090 SSPFLDAAPsLPDSR 1104 1638.729 (-0.0031) Da

|                         |     |
|-------------------------|-----|
| Parent Ion              | m/z |
| No parent ions observed |     |

## Modifications and supporting evidence

| Position | Residue ID | Modification | Evidence              |
|----------|------------|--------------|-----------------------|
| 10       | (1099)     | Phospho (ST) | b7=>b11-98, y2=>y7-98 |

## Spectrum interpretation

| Rule                                   | passed/tests | Description                                                                                                                                                                                                                                                                                                                                                                                                                                                                                                                                                                                                                                  |
|----------------------------------------|--------------|----------------------------------------------------------------------------------------------------------------------------------------------------------------------------------------------------------------------------------------------------------------------------------------------------------------------------------------------------------------------------------------------------------------------------------------------------------------------------------------------------------------------------------------------------------------------------------------------------------------------------------------------|
| Parent ions present                    | 0/1          | Parent ions corresponding to the parent fragment - 1 phosphate ions were not found                                                                                                                                                                                                                                                                                                                                                                                                                                                                                                                                                           |
| Three -98 Ions present                 | 1/1          | 7 des-phospho fragment ions were found.                                                                                                                                                                                                                                                                                                                                                                                                                                                                                                                                                                                                      |
| Unique -98 transitions present         | 1/1          | transition b7 to b11-98, transition y2 to y7-98 support unique phosphorylation at position 10<br><br/>                                                                                                                                                                                                                                                                                                                                                                                                                                                                                                                                       |
| Four Sequential b or y ions            | 0/1          | Sequence of four y or b ions not observed                                                                                                                                                                                                                                                                                                                                                                                                                                                                                                                                                                                                    |
| Five of six sequential ions present    | 0/1          |                                                                                                                                                                                                                                                                                                                                                                                                                                                                                                                                                                                                                                              |
| Proline directed fragmentation pattern | 3/3          | NOTE: S-P is a low abundance fragmentation.<br>PASS: y13-98> y12-98<br/><br>No proline ions at b3<br/><br>PASS: y7-98> y6-98<br/><br>No proline ions at b9<br/><br>No proline ions at y4<br>PASS: b12-98< b11-98<br/>                                                                                                                                                                                                                                                                                                                                                                                                                        |
| PhosphoTyrosine transition present     | 0/0          | 0 of 0 phosphotyrosine transitions were found.                                                                                                                                                                                                                                                                                                                                                                                                                                                                                                                                                                                               |
| Six of top ten ions identified         | 5/6          | ion 1 (mass: 851.403: intensity: 15912.13) assigned 1 times<br>ion 2 (mass: 753.419: intensity: 11302.72) assigned 1 times<br>ion 3 (mass: 733.522: intensity: 7687.09) assigned 2 times<br>ion 4 (mass: 554.161: intensity: 4761.32) assigned 0 times<br>ion 5 (mass: 980.488: intensity: 3986.59) assigned 0 times<br>ion 6 (mass: 1086.551: intensity: 3795.36) assigned 0 times<br>ion 7 (mass: 811.627: intensity: 3760.08) assigned 0 times<br>ion 8 (mass: 879.466: intensity: 3607.78) assigned 1 times<br>ion 9 (mass: 562.127: intensity: 3492.93) assigned 1 times<br>ion 10 (mass: 981.505: intensity: 2864.99) assigned 0 times |

## Ion Table

27 ions assigned of 53 ions above threshold (50%).

### N-terminal ions

| AA | N-ion | b                              | b*                      | b-98                           | bo                       |
|----|-------|--------------------------------|-------------------------|--------------------------------|--------------------------|
| S  | 1     | 88.039                         | 71.013                  | -                              | 70.029                   |
| S  | 2     | 175.071                        | 158.045                 | -                              | 157.061                  |
| P  | 3     | 272.124                        | 255.098                 | -                              | 254.114                  |
| F  | 4     | 419.193                        | 402.166                 | -                              | 401.182<br>401.343 (2)   |
| L  | 5     | 532.277                        | 515.250                 | -                              | 514.266<br>514.245 (4)   |
| D  | 6     | 647.304<br>647.283 (7)         | 630.277                 | -                              | 629.293                  |
| A  | 7     | 718.341<br>718.383 (8)         | 701.314                 | -                              | 700.330<br>700.366 (13)  |
| A  | 8     | 789.378                        | 772.351                 | -                              | 771.367                  |
| P  | 9     | 886.431                        | 869.404<br>869.368 (10) | -                              | 868.420                  |
| s  | 10    | 1053.429                       | 1036.402                | 955.443                        | 1035.418                 |
| L  | 11    | 1166.513<br>1166.388 (5)       | 1149.486                | 1068.527<br>1068.497 (8)       | 1148.502<br>1148.528 (2) |
| P  | 12    | 1263.566                       | 1246.539                | 1165.580                       | 1245.555                 |
| D  | 13    | 1378.593                       | 1361.566                | 1280.607<br>*1280.596 (2)      | 1360.582                 |
| S  | 14    | 1465.625<br>*733.522 [2+] (48) | 1448.598                | 1367.639<br>*684.502 [2+] (13) | 1447.614                 |
| R  | 15    | -                              | -                       | -                              | -                        |

### C-terminal ions

| AA | C-ion | y                                             | y*                      | y-98                           | yo                      |
|----|-------|-----------------------------------------------|-------------------------|--------------------------------|-------------------------|
| S  | 15    | -                                             | -                       | -                              | -                       |
| S  | 14    | 1552.704                                      | 1535.678                | 1454.719                       | 1534.694                |
| P  | 13    | 1465.672<br>*733.522 [2+] (48)                | 1448.646                | 1367.686<br>*684.502 [2+] (13) | 1447.662                |
| F  | 12    | 1368.620<br>*684.502 [2+] (13)                | 1351.593                | 1270.634                       | 1350.609                |
| L  | 11    | 1221.551<br>611.321 [2+] (5)<br>1221.510 (2)  | 1204.525                | 1123.565<br>562.127 [2+] (21)  | 1203.541                |
| D  | 10    | 1108.467<br>1108.467 (13)<br>555.233 [2+] (4) | 1091.441                | 1010.481<br>1010.552 (9)       | 1090.457                |
| A  | 9     | 993.440<br>993.475 (11)                       | 976.414                 | 895.454                        | 975.430                 |
| A  | 8     | 922.403<br>922.439 (14)                       | 905.377                 | 824.417                        | 904.392                 |
| P  | 7     | 851.366<br>851.403 (100)                      | 834.339                 | 753.380<br>753.419 (71)        | 833.355                 |
| s  | 6     | 754.313                                       | 737.287                 | 656.327                        | 736.303                 |
| L  | 5     | 587.315                                       | 570.288                 | -                              | 569.304                 |
| P  | 4     | 474.231                                       | 457.204<br>*457.270 (3) | -                              | 456.220<br>456.369 (10) |
| D  | 3     | 377.178                                       | 360.151                 | -                              | 359.167                 |
| S  | 2     | 262.151<br>262.178 (8)                        | 245.124                 | -                              | 244.140                 |
| R  | 1     | 175.119                                       | 158.092                 | -                              | 157.108                 |

### Ion distribution

| Threshold | Ion count | Matches | % matched |
|-----------|-----------|---------|-----------|
| 0         | 82        | 35      | 42        |
| 0.5       | 73        | 33      | 45        |
| 1         | 66        | 32      | 48        |
| 2         | 53        | 27      | 50        |
| 3         | 48        | 23      | 47        |
| 4         | 45        | 22      | 48        |
| 5         | 39        | 19      | 48        |
| 10        | 24        | 12      | 50        |

### Observed ions > 1%

| m/z     | Intensity            | % max | Assignment (delta)                                      |
|---------|----------------------|-------|---------------------------------------------------------|
| 244.280 | 193.27 <sub>3</sub>  | 1.21  | a3 (0.15) : a5*[2+] (0.14) : y2o (0.13)                 |
| 262.178 | 1347.60 <sub>3</sub> | 8.46  | y2 (0.02)                                               |
| 269.135 | 185.93 <sub>3</sub>  | 1.16  |                                                         |
| 342.246 | 304.13 <sub>3</sub>  | 1.91  |                                                         |
| 343.269 | 350.54 <sub>3</sub>  | 2.20  |                                                         |
| 376.378 | 317.03 <sub>3</sub>  | 1.99  |                                                         |
| 378.093 | 220.72 <sub>3</sub>  | 1.38  | y6[2+] (0.43)                                           |
| 401.343 | 382.59 <sub>3</sub>  | 2.40  | b4o (0.16)                                              |
| 402.374 | 197.44 <sub>3</sub>  | 1.24  | b4* (0.20)                                              |
| 456.369 | 1654.21 <sub>3</sub> | 10.39 | y4o (0.14)                                              |
| 457.270 | 599.65 <sub>3</sub>  | 3.76  | y4* (0.06) : z4 (0.06)                                  |
| 473.262 | 2657.00 <sub>3</sub> | 16.69 |                                                         |
| 491.175 | 1500.34 <sub>3</sub> | 9.42  |                                                         |
| 496.256 | 708.35 <sub>3</sub>  | 4.45  |                                                         |
| 514.245 | 761.25 <sub>3</sub>  | 4.78  | b5o (-0.02)                                             |
| 554.161 | 4761.32 <sub>3</sub> | 29.92 |                                                         |
| 555.233 | 727.69 <sub>3</sub>  | 4.57  | y10[2+] (0.49)                                          |
| 562.127 | 3492.93 <sub>3</sub> | 21.95 | y11-98[2+] (-0.15)                                      |
| 611.321 | 813.27 <sub>3</sub>  | 5.11  | y11[2+] (0.04)                                          |
| 612.437 | 826.51 <sub>3</sub>  | 5.19  |                                                         |
| 615.331 | 721.95 <sub>3</sub>  | 4.53  | x5 (0.02)                                               |
| 647.283 | 1136.44 <sub>3</sub> | 7.14  | b6 (-0.02)                                              |
| 682.293 | 1572.74 <sub>3</sub> | 9.88  |                                                         |
| 684.502 | 2170.33 <sub>3</sub> | 13.63 | b14-98[2+] (0.17) : y13-98[2+] (0.15) : y12[2+] (-0.31) |
| 693.565 | 1283.80 <sub>3</sub> | 8.06  |                                                         |
| 700.366 | 2087.74 <sub>3</sub> | 13.12 | b7o (0.03)                                              |
| 718.383 | 1365.90 <sub>3</sub> | 8.58  | b7 (0.04)                                               |
| 733.522 | 7687.09 <sub>3</sub> | 48.30 | b14[2+] (0.20) : y13[2+] (0.18)                         |

|          |           |       |                             |
|----------|-----------|-------|-----------------------------|
| 734.373  | 2232.21,  | 14.02 |                             |
| 753.419  | 11302.72, | 71.03 | y7-98 (0.03)                |
| 762.473  | 2534.99,  | 15.93 |                             |
| 802.622  | 1461.56,  | 9.18  |                             |
| 811.627  | 3760.08,  | 23.63 |                             |
| 842.484  | 1881.19,  | 11.82 |                             |
| 851.403  | 15912.13, | 100   | y7 (0.03)                   |
| 869.368  | 1628.81,  | 10.23 | b9* (-0.03)                 |
| 870.388  | 1107.95,  | 6.96  |                             |
| 879.466  | 3607.78,  | 22.67 | x7 (0.10)                   |
| 880.479  | 2629.46,  | 16.52 |                             |
| 922.439  | 2251.43,  | 14.14 | y8 (0.03)                   |
| 923.433  | 1365.80,  | 8.58  |                             |
| 980.488  | 3986.59,  | 25.05 |                             |
| 981.505  | 2864.99,  | 18.00 |                             |
| 993.475  | 1755.16,  | 11.03 | y9 (0.03)                   |
| 1010.552 | 1472.26,  | 9.25  | y10-98 (0.07)               |
| 1028.472 | 1837.59,  | 11.54 |                             |
| 1068.497 | 1310.98,  | 8.23  | b11-98 (-0.03)              |
| 1080.558 | 1408.58,  | 8.85  |                             |
| 1086.551 | 3795.36,  | 23.85 |                             |
| 1087.614 | 2057.42,  | 12.92 |                             |
| 1108.467 | 2202.03,  | 13.83 | y10 (-0.00)                 |
| 1141.578 | 537.55,   | 3.37  |                             |
| 1148.528 | 445.63,   | 2.80  | b11o (0.02)                 |
| 1151.528 | 547.09,   | 3.43  |                             |
| 1166.388 | 920.72,   | 5.78  | b11 (-0.12)                 |
| 1221.510 | 425.04,   | 2.67  | y11 (-0.04)                 |
| 1222.438 | 668.55,   | 4.20  |                             |
| 1264.525 | 182.87,   | 1.14  |                             |
| 1280.596 | 336.83,   | 2.11  | c12 (0.00) : b13-98 (-0.01) |
| 1288.455 | 285.62,   | 1.79  |                             |
| 1298.497 | 198.77,   | 1.24  |                             |
| 1350.686 | 226.14,   | 1.42  | a13 (0.08) : y12o (0.07)    |
| 1378.515 | 296.58,   | 1.86  | b13 (-0.07)                 |
| 1379.457 | 307.39,   | 1.93  |                             |
| 1409.547 | 258.38,   | 1.62  |                             |
| 1410.612 | 769.59,   | 4.83  |                             |



**S1103**

# ProPhosSI MS/MS report

Mass: 611.279660 Charge: 2+

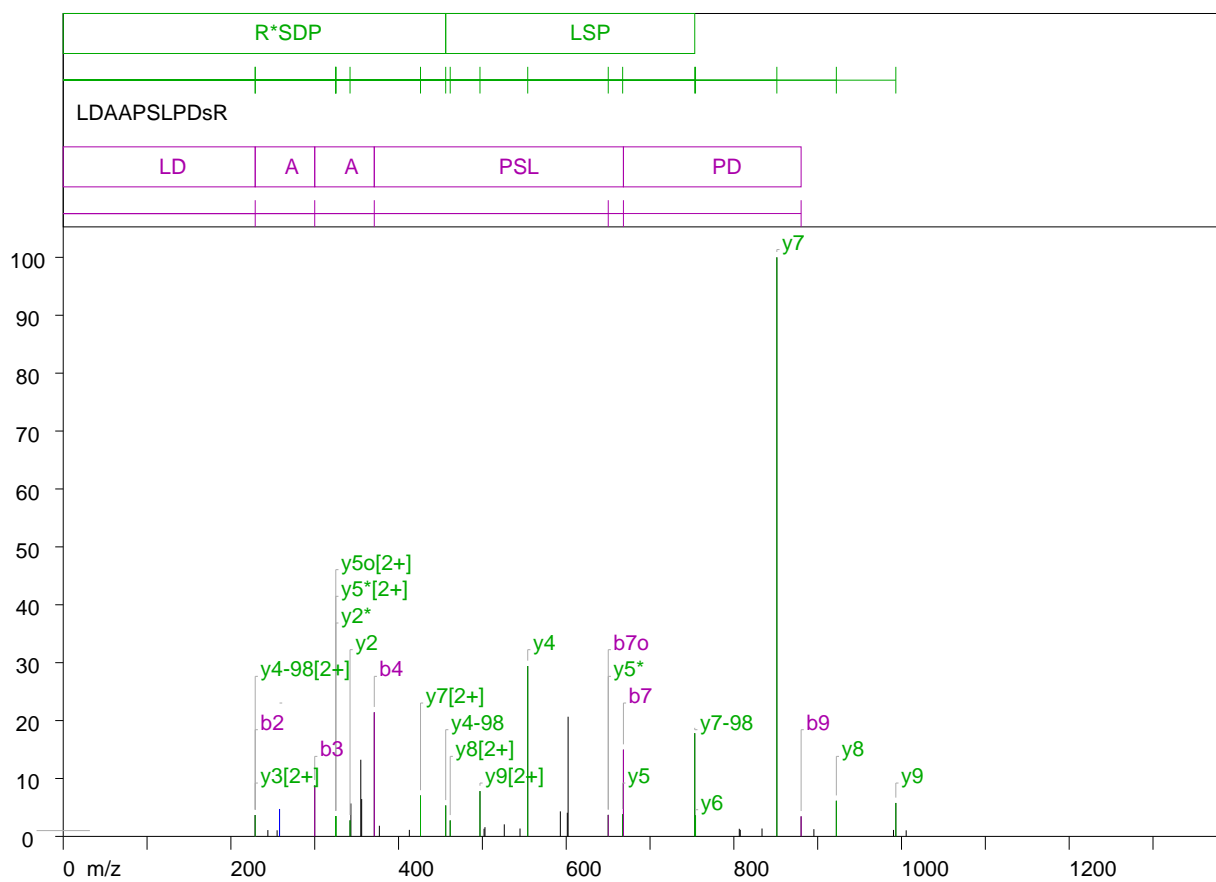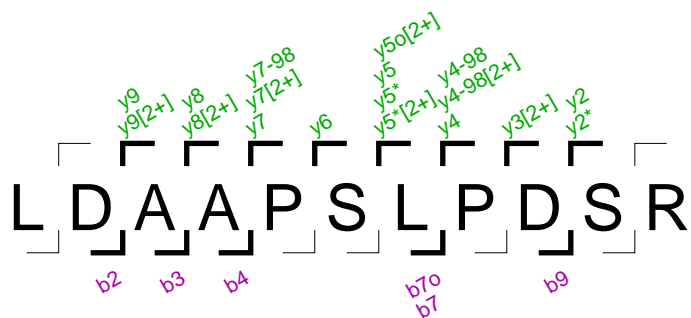

## Cav3.2 human

(56) 1094 LDAAPSLPDsR 1104 1220.543 (-0.0001) Da

### Modifications and supporting evidence

| Position | Residue ID | Modification | Evidence  |
|----------|------------|--------------|-----------|
| 10       | (1103)     | Phospho (ST) | y4, y4-98 |

### Spectrum interpretation

| Rule                                   | passed/tests | Description                                                                                                                                                                                                                                                                                                                                                                                                                                                                                                                                                                                                                            |
|----------------------------------------|--------------|----------------------------------------------------------------------------------------------------------------------------------------------------------------------------------------------------------------------------------------------------------------------------------------------------------------------------------------------------------------------------------------------------------------------------------------------------------------------------------------------------------------------------------------------------------------------------------------------------------------------------------------|
|                                        |              |                                                                                                                                                                                                                                                                                                                                                                                                                                                                                                                                                                                                                                        |
| Three -98 Ions present                 | 0/1          | 2 des-phospho fragment ions were found.                                                                                                                                                                                                                                                                                                                                                                                                                                                                                                                                                                                                |
| Unique -98 transitions present         | 0/1          | No transitions found to support unique phosphorylation at position 10<br><br/>                                                                                                                                                                                                                                                                                                                                                                                                                                                                                                                                                         |
| Four Sequential b or y ions            | 0/1          | Sequence of four y or b ions not observed                                                                                                                                                                                                                                                                                                                                                                                                                                                                                                                                                                                              |
| Five of six sequential ions present    | 0/1          |                                                                                                                                                                                                                                                                                                                                                                                                                                                                                                                                                                                                                                        |
| Proline directed fragmentation pattern | 4/4          | PASS: y7-98> y6-98<br/><br>PASS: b5< b4<br/><br>PASS: y4-98> y3-98<br/><br>PASS: b8< b7<br/>                                                                                                                                                                                                                                                                                                                                                                                                                                                                                                                                           |
| PhosphoTyrosine transition present     | 0/0          | 0 of 0 phosphotyrosine transitions were found.                                                                                                                                                                                                                                                                                                                                                                                                                                                                                                                                                                                         |
| Six of top ten ions identified         | 8/6          | ion 1 (mass: 851.279: intensity: 9926.91) assigned 1 times<br>ion 2 (mass: 554.092: intensity: 2920.81) assigned 1 times<br>ion 3 (mass: 371.042: intensity: 2127.39) assigned 1 times<br>ion 4 (mass: 602.276: intensity: 2051.59) assigned 0 times<br>ion 5 (mass: 753.348: intensity: 1769.80) assigned 1 times<br>ion 6 (mass: 668.271: intensity: 1486.68) assigned 1 times<br>ion 7 (mass: 354.969: intensity: 1314.13) assigned 0 times<br>ion 8 (mass: 300.010: intensity: 874.24) assigned 1 times<br>ion 9 (mass: 497.144: intensity: 776.58) assigned 1 times<br>ion 10 (mass: 426.203: intensity: 700.53) assigned 1 times |

### Ion Table

21 ions assigned of 27 ions above threshold (77%).

#### N-terminal ions

| AA | N-ion | b                       | b*      | b-98 | bo      |
|----|-------|-------------------------|---------|------|---------|
| L  | 1     | 114.091                 | 97.065  | -    | 96.081  |
| D  | 2     | 229.118<br>*229.031 (3) | 212.092 | -    | 211.108 |

|   |    |                         |          |         |                         |
|---|----|-------------------------|----------|---------|-------------------------|
| A | 3  | 300.155<br>300.010 (8)  | 283.129  | -       | 282.145                 |
| A | 4  | 371.193<br>371.042 (21) | 354.166  | -       | 353.182                 |
| P | 5  | 468.245                 | 451.219  | -       | 450.235                 |
| S | 6  | 555.277                 | 538.251  | -       | 537.267                 |
| L | 7  | 668.361<br>668.271 (14) | 651.335  | -       | 650.351<br>*650.142 (3) |
| P | 8  | 765.414                 | 748.388  | -       | 747.404                 |
| D | 9  | 880.441<br>880.236 (3)  | 863.415  | -       | 862.431                 |
| s | 10 | 1047.440                | 1030.413 | 949.454 | 1029.429                |
| R | 11 | -                       | -        | -       | -                       |

### C-terminal ions

| AA | C-ion | y                                            | y*                                           | y-98                                        | yo                           |
|----|-------|----------------------------------------------|----------------------------------------------|---------------------------------------------|------------------------------|
| L  | 11    | -                                            | -                                            | -                                           | -                            |
| D  | 10    | 1108.467                                     | 1091.441                                     | 1010.481                                    | 1090.457                     |
| A  | 9     | 993.440<br>497.144 [2+] (7)<br>993.222 (5)   | 976.414                                      | 895.454                                     | 975.430                      |
| A  | 8     | 922.403<br>461.640 [2+] (2)<br>922.271 (6)   | 905.377                                      | 824.417                                     | 904.392                      |
| P  | 7     | 851.366<br>851.279 (100)<br>426.203 [2+] (7) | 834.339                                      | 753.380<br>753.348 (17)                     | 833.355                      |
| S  | 6     | 754.313<br>754.271 (3)                       | 737.287                                      | 656.327                                     | 736.303                      |
| L  | 5     | 667.281<br>667.349 (3)                       | 650.255<br>*325.153 [2+] (3)<br>*650.142 (3) | 569.295                                     | 649.271<br>*325.153 [2+] (3) |
| P  | 4     | 554.197<br>554.092 (29)                      | 537.171                                      | 456.211<br>*229.031 [2+] (3)<br>456.270 (5) | 536.186                      |
| D  | 3     | 457.144<br>*229.031 [2+] (3)                 | 440.118                                      | 359.158                                     | 439.134                      |
| s  | 2     | 342.117<br>342.121 (2)                       | 325.091<br>*325.153 (3)                      | 244.131                                     | 324.107                      |
| R  | 1     | 175.119                                      | 158.092                                      | -                                           | 157.108                      |

### Ion distribution

| Threshold | Ion count | Matches | % matched |
|-----------|-----------|---------|-----------|
| 0         | 61        | 31      | 50        |
| 0.5       | 51        | 30      | 58        |
| 1         | 40        | 27      | 67        |
| 2         | 27        | 20      | 74        |
| 3         | 24        | 18      | 75        |
| 4         | 18        | 12      | 66        |
| 5         | 15        | 12      | 80        |
| 10        | 7         | 5       | 71        |

Observed ions > 1%

| m/z     | Intensity            | % max | Assignment (delta)                                                                       |
|---------|----------------------|-------|------------------------------------------------------------------------------------------|
| 229.031 | 366.23 <sub>2</sub>  | 3.68  | y4-98[2+] (0.42) : y3[2+] (-0.04) : b2 (-0.08)                                           |
| 244.113 | 108.18 <sub>2</sub>  | 1.08  | y2-98 (-0.01)                                                                            |
| 255.146 | 104.79 <sub>2</sub>  | 1.05  | a3* (0.01) : a6o[2+] (0.00) : a6*[2+] (-0.48)                                            |
| 258.032 | 469.91 <sub>2</sub>  | 4.73  |                                                                                          |
| 300.010 | 874.24 <sub>2</sub>  | 8.80  | b3 (-0.14)                                                                               |
| 325.153 | 348.85 <sub>2</sub>  | 3.51  | y2* (0.06) : z2 (0.06) : y5o[2+] (0.01) : a4o (-0.03) : y5*[2+] (-0.47) : z5[2+] (-0.47) |
| 342.121 | 275.15 <sub>2</sub>  | 2.77  | y2 (0.00)                                                                                |
| 343.165 | 564.71 <sub>2</sub>  | 5.68  | c7[2+] (-0.03) : a4 (-0.03)                                                              |
| 354.969 | 1314.13 <sub>2</sub> | 13.23 |                                                                                          |
| 356.004 | 640.35 <sub>2</sub>  | 6.45  |                                                                                          |
| 371.042 | 2127.39 <sub>2</sub> | 21.43 | b4 (-0.15)                                                                               |
| 377.128 | 182.54 <sub>2</sub>  | 1.83  | y7-98[2+] (-0.06)                                                                        |
| 412.896 | 112.07 <sub>2</sub>  | 1.12  | y8-98[2+] (0.18)                                                                         |
| 426.203 | 700.53 <sub>2</sub>  | 7.05  | y7[2+] (0.01)                                                                            |
| 456.270 | 530.96 <sub>2</sub>  | 5.34  | y4-98 (0.05)                                                                             |
| 461.640 | 274.02 <sub>2</sub>  | 2.76  | y8[2+] (-0.06)                                                                           |
| 497.144 | 776.58 <sub>2</sub>  | 7.82  | y9[2+] (-0.08)                                                                           |
| 502.013 | 131.22 <sub>2</sub>  | 1.32  | a10*[2+] (0.29)                                                                          |
| 503.085 | 158.44 <sub>2</sub>  | 1.59  |                                                                                          |
| 526.127 | 206.51 <sub>2</sub>  | 2.08  |                                                                                          |
| 544.891 | 135.01 <sub>2</sub>  | 1.36  |                                                                                          |
| 554.092 | 2920.81 <sub>2</sub> | 29.42 | y4 (-0.10)                                                                               |
| 593.009 | 429.02 <sub>2</sub>  | 4.32  |                                                                                          |
| 601.323 | 405.76 <sub>2</sub>  | 4.08  |                                                                                          |
| 602.276 | 2051.59 <sub>2</sub> | 20.66 |                                                                                          |
| 650.142 | 368.46 <sub>2</sub>  | 3.71  | y5* (-0.11) : z5 (-0.11) : b7o (-0.20)                                                   |
| 667.349 | 379.11 <sub>2</sub>  | 3.81  | y5 (0.06)                                                                                |
| 668.271 | 1486.68 <sub>2</sub> | 14.97 | b7 (-0.09)                                                                               |
| 753.348 | 1769.80 <sub>2</sub> | 17.82 | y7-98 (-0.03)                                                                            |
| 754.271 | 358.77 <sub>2</sub>  | 3.61  | y6 (-0.04)                                                                               |
| 806.461 | 130.79 <sub>2</sub>  | 1.31  |                                                                                          |
| 807.629 | 112.60 <sub>2</sub>  | 1.13  |                                                                                          |
| 833.584 | 135.39 <sub>2</sub>  | 1.36  | y7o (0.22)                                                                               |
| 851.279 | 9926.91 <sub>2</sub> | 100   | y7 (-0.08)                                                                               |
| 880.236 | 343.51 <sub>2</sub>  | 3.46  | b9 (-0.20)                                                                               |
| 895.457 | 123.47 <sub>2</sub>  | 1.24  | y9-98 (0.00)                                                                             |
| 922.271 | 610.92 <sub>2</sub>  | 6.15  | y8 (-0.13)                                                                               |
| 990.458 | 110.73 <sub>2</sub>  | 1.11  |                                                                                          |
| 993.222 | 573.22 <sub>2</sub>  | 5.77  | y9 (-0.21)                                                                               |

|          |         |      |  |
|----------|---------|------|--|
| 1005.566 | 104.06, | 1.04 |  |
|----------|---------|------|--|

**S1107**

# ProPhosSI MS/MS report

Mass: 1095.022710 Charge: 2+

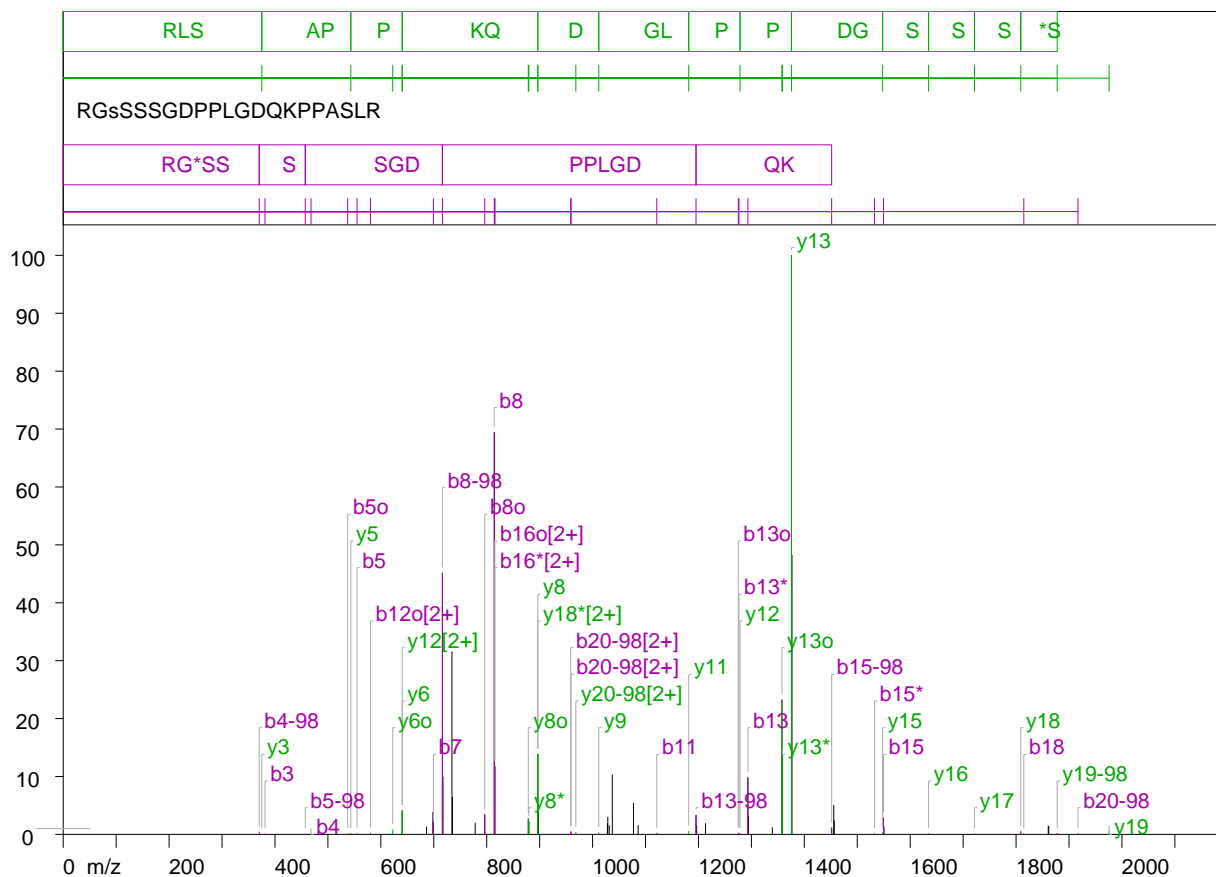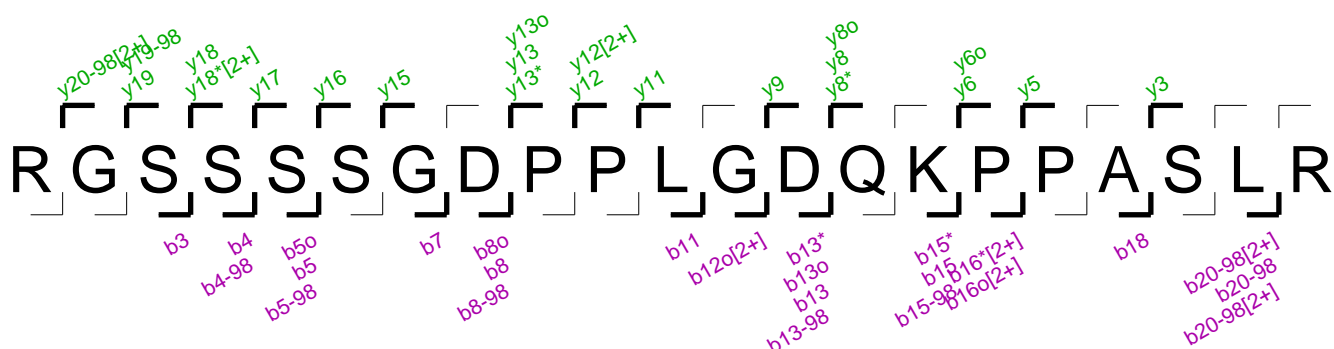



## Cav3.2 human

(66) 1105 RGsSSSGDPPLGDQKPPASLR 1125 2188.027 (0.0023) Da

|                         |     |
|-------------------------|-----|
| Parent Ion              | m/z |
| No parent ions observed |     |

## Modifications and supporting evidence

| Position | Residue ID | Modification | Evidence      |
|----------|------------|--------------|---------------|
| 3        | (1107)     | Phospho (ST) | y18 => y19-98 |

## Spectrum interpretation

| Rule                                   | passed/tests | Description                                                                                                                                                                                                                                                                                                                                                                                                                   |
|----------------------------------------|--------------|-------------------------------------------------------------------------------------------------------------------------------------------------------------------------------------------------------------------------------------------------------------------------------------------------------------------------------------------------------------------------------------------------------------------------------|
| Parent ions present                    | 0/1          | Parent ions corresponding to the parent fragment - 1 phosphate ions were not found                                                                                                                                                                                                                                                                                                                                            |
| Three -98 Ions present                 | 1/1          | 8 des-phospho fragment ions were found.                                                                                                                                                                                                                                                                                                                                                                                       |
| Unique -98 transitions present         | 1/1          | transition y18 to y19-98 support unique phosphorylation at position 3<br><br/>                                                                                                                                                                                                                                                                                                                                                |
| Four Sequential b or y ions            | 1/1          | Sequence of four y ions found from y15 to y18.                                                                                                                                                                                                                                                                                                                                                                                |
| Five of six sequential ions present    | 1/1          | Five of Six ions found between y8 and y13<br>Five of Six ions found between y11 and y16<br>Five of Six ions found between y12 and y17<br>Five of Six ions found between y13 and y18<br>Five of Six ions found between y14 and y19<br>Five of Six ions found between y15 and y20<br>Five of Six ions found between y16 and y21                                                                                                 |
| Proline directed fragmentation pattern | 6/6          | PASS: y13> y12 with ratio 24.1<br/><br>PASS: b9-98< b8-98<br/><br>NOTE: P-P is a low abundance fragmentation.<br>PASS: y12> y11 with ratio 6.99<br/><br>No proline ions at b10-98<br/><br>PASS: y6> y5 with ratio 18.3<br/><br>PASS: b16-98< b15-98<br/><br>NOTE: P-P is a low abundance fragmentation.<br>PASS: y5> y4<br/><br>No proline ions at b17-98<br/>                                                                |
| PhosphoTyrosine transition present     | 0/0          | 0 of 0 phosphotyrosine transitions were found.                                                                                                                                                                                                                                                                                                                                                                                |
| Six of top ten ions identified         | 8/6          | ion 1 (mass: 1375.692: intensity: 74137.06) assigned 2 times<br>ion 2 (mass: 814.274: intensity: 51469.17) assigned 1 times<br>ion 3 (mass: 1376.672: intensity: 35805.56) assigned 1 times<br>ion 4 (mass: 716.312: intensity: 33505.55) assigned 2 times<br>ion 5 (mass: 734.313: intensity: 23422.12) assigned 0 times<br>ion 6 (mass: 1357.686: intensity: 17255.10) assigned 1 times<br>ion 7 (mass: 896.550: intensity: |

|   |   |                                                                                                                                                                                                                                   |
|---|---|-----------------------------------------------------------------------------------------------------------------------------------------------------------------------------------------------------------------------------------|
| - | - | 10289.16) assigned 3 times<br>ion 8 (mass: 1358.679: intensity:<br>10183.16) assigned 2 times<br>ion 9 (mass: 815.242: intensity:<br>8738.66) assigned 2 times<br>ion 10 (mass: 1037.250: intensity:<br>7652.21) assigned 0 times |
|---|---|-----------------------------------------------------------------------------------------------------------------------------------------------------------------------------------------------------------------------------------|

## Ion Table

47 ions assigned of 94 ions above threshold (50%).

### N-terminal ions

| AA | N-ion | b                        | b*                             | b-98                                                             | bo                             |
|----|-------|--------------------------|--------------------------------|------------------------------------------------------------------|--------------------------------|
| R  | 1     | 157.108                  | 140.082                        | -                                                                | 139.098                        |
| G  | 2     | 214.130                  | 197.103                        | -                                                                | 196.119                        |
| s  | 3     | 381.128<br>381.170 (0)   | 364.102                        | 283.142                                                          | 363.118                        |
| S  | 4     | 468.160<br>468.126 (0)   | 451.134                        | 370.174<br>370.248 (0)                                           | 450.150                        |
| S  | 5     | 555.192<br>555.077 (0)   | 538.166                        | 457.206<br>457.278 (0)                                           | 537.182<br>537.349 (0)         |
| S  | 6     | 642.224                  | 625.198                        | 544.238                                                          | 624.214                        |
| G  | 7     | 699.246<br>699.257 (2)   | 682.219                        | 601.260                                                          | 681.235                        |
| D  | 8     | 814.273<br>814.274 (69)  | 797.246                        | 716.287<br>*716.312 (45)                                         | 796.262<br>*796.299 (3)        |
| P  | 9     | 911.326                  | 894.299                        | 813.340                                                          | 893.315                        |
| P  | 10    | 1008.378                 | 991.352                        | 910.392                                                          | 990.368                        |
| L  | 11    | 1121.462<br>1121.302 (0) | 1104.436                       | 1023.476                                                         | 1103.452                       |
| G  | 12    | 1178.484                 | 1161.457                       | 1080.498                                                         | 1160.473<br>580.411 [2+] (0)   |
| D  | 13    | 1293.511<br>1293.385 (9) | 1276.484<br>1276.459 (0)       | 1195.525<br>*1195.420 (3)                                        | 1275.500<br>1275.293 (0)       |
| Q  | 14    | 1421.569                 | 1404.543                       | 1323.583                                                         | 1403.559                       |
| K  | 15    | 1549.664<br>1549.451 (2) | 1532.638<br>1532.625 (0)       | 1451.678<br>1451.637 (1)                                         | 1531.654                       |
| P  | 16    | 1646.717                 | 1629.691<br>*815.242 [2+] (11) | 1548.731                                                         | 1628.707<br>*815.242 [2+] (11) |
| P  | 17    | 1743.770                 | 1726.743                       | 1645.784                                                         | 1725.759                       |
| A  | 18    | 1814.807<br>1814.615 (0) | 1797.780                       | 1716.821                                                         | 1796.796                       |
| S  | 19    | 1901.839                 | 1884.812                       | 1803.853                                                         | 1883.828                       |
| L  | 20    | 2014.923                 | 1997.897                       | 1916.937<br>959.383 [2+] (0)<br>1916.973 (0)<br>958.633 [2+] (0) | 1996.913                       |
| R  | 21    | -                        | -                              | -                                                                | -                              |

### C-terminal ions

| AA | C-ion | y                        | y*                             | y-98                         | yo       |
|----|-------|--------------------------|--------------------------------|------------------------------|----------|
| R  | 21    | -                        | -                              | -                            | -        |
| G  | 20    | 2032.934                 | 2015.907                       | 1934.948<br>968.378 [2+] (0) | 2014.923 |
| s  | 19    | 1975.912<br>1975.741 (0) | 1958.886                       | 1877.926<br>1877.688 (0)     | 1957.902 |
| S  | 18    | 1808.914<br>1808.903 (0) | 1791.887<br>*896.550 [2+] (13) | -                            | 1790.903 |

|   |    |                                               |                            |   |                           |
|---|----|-----------------------------------------------|----------------------------|---|---------------------------|
| S | 17 | 1721.882<br>1721.433 (0)                      | 1704.855                   | - | 1703.871                  |
| S | 16 | 1634.850<br>1634.745 (0)                      | 1617.823                   | - | 1616.839                  |
| G | 15 | 1547.818<br>1547.851 (0)                      | 1530.791                   | - | 1529.807                  |
| D | 14 | 1490.796                                      | 1473.770                   | - | 1472.786                  |
| P | 13 | 1375.769<br>*1375.692 (100)                   | 1358.743<br>*1358.679 (13) | - | 1357.759<br>1357.686 (23) |
| P | 12 | 1278.717<br>1278.613 (0)<br>*640.354 [2+] (4) | 1261.690                   | - | 1260.706                  |
| L | 11 | 1181.664<br>1181.580 (0)                      | 1164.637                   | - | 1163.653                  |
| G | 10 | 1068.580                                      | 1051.553                   | - | 1050.569                  |
| D | 9  | 1011.558<br>1011.682 (0)                      | 994.532                    | - | 993.548                   |
| Q | 8  | 896.531<br>*896.550 (13)                      | 879.505<br>*879.531 (2)    | - | 878.521<br>878.534 (2)    |
| K | 7  | 768.473                                       | 751.446                    | - | 750.462                   |
| P | 6  | 640.378<br>*640.354 (4)                       | 623.351                    | - | 622.367<br>622.416 (0)    |
| P | 5  | 543.325<br>543.330 (0)                        | 526.298                    | - | 525.314                   |
| A | 4  | 446.272                                       | 429.246                    | - | 428.262                   |
| S | 3  | 375.235<br>375.133 (0)                        | 358.209                    | - | 357.225                   |
| L | 2  | 288.203                                       | 271.177                    | - | 270.193                   |
| R | 1  | 175.119                                       | 158.092                    | - | 157.108                   |

### Ion distribution

| Threshold | Ion count | Matches | % matched |
|-----------|-----------|---------|-----------|
| 0         | 102       | 52      | 50        |
| 0.5       | 50        | 22      | 44        |
| 1         | 39        | 17      | 43        |
| 2         | 27        | 16      | 59        |
| 3         | 22        | 12      | 54        |
| 4         | 16        | 10      | 62        |
| 5         | 15        | 9       | 60        |
| 10        | 10        | 8       | 80        |

### Observed ions > 1%

| m/z     | Intensity             | % max | Assignment (delta)          |
|---------|-----------------------|-------|-----------------------------|
| 640.354 | 3074.68 <sub>3</sub>  | 4.14  | y12[2+] (0.49) : y6 (-0.02) |
| 686.318 | 997.27 <sub>3</sub>   | 1.34  |                             |
| 698.309 | 2862.12 <sub>3</sub>  | 3.86  |                             |
| 699.257 | 1532.73 <sub>3</sub>  | 2.06  | b7 (0.01)                   |
| 716.312 | 33505.55 <sub>3</sub> | 45.19 | c7 (0.03) : b8-98 (0.02)    |
| 717.346 | 7390.99 <sub>3</sub>  | 9.96  |                             |

|          |           |       |                                              |
|----------|-----------|-------|----------------------------------------------|
| 734.313  | 23422.12, | 31.59 |                                              |
| 735.321  | 4797.41,  | 6.47  |                                              |
| 778.229  | 1481.67,  | 1.99  |                                              |
| 796.299  | 2564.83,  | 3.45  | b8o (0.03) : x7 (-0.16)                      |
| 814.274  | 51469.17, | 69.42 | b8 (0.00)                                    |
| 815.242  | 8738.66,  | 11.78 | b16o[2+] (0.38) : b16*[2+] (-0.10)           |
| 878.534  | 2063.07,  | 2.78  | y8o (0.01)                                   |
| 879.531  | 1675.18,  | 2.25  | z8 (0.02) : y8* (0.02)                       |
| 896.550  | 10289.16, | 13.87 | y18*[2+] (0.10) : z18[2+] (0.10) : y8 (0.01) |
| 897.548  | 2858.33,  | 3.85  |                                              |
| 1027.973 | 1431.40,  | 1.93  |                                              |
| 1028.720 | 2238.59,  | 3.01  |                                              |
| 1031.478 | 1165.53,  | 1.57  |                                              |
| 1037.250 | 7652.21,  | 10.32 |                                              |
| 1077.271 | 4016.63,  | 5.41  |                                              |
| 1085.971 | 1186.98,  | 1.60  |                                              |
| 1195.420 | 2486.71,  | 3.35  | c12 (-0.09) : b13-98 (-0.10)                 |
| 1196.551 | 1166.91,  | 1.57  |                                              |
| 1213.416 | 1431.46,  | 1.93  |                                              |
| 1293.385 | 7280.45,  | 9.82  | b13 (-0.12)                                  |
| 1294.536 | 2371.57,  | 3.19  |                                              |
| 1339.615 | 909.02,   | 1.22  |                                              |
| 1357.686 | 17255.10, | 23.27 | y13o (-0.07)                                 |
| 1358.679 | 10183.16, | 13.73 | y13* (-0.06) : z13 (-0.06)                   |
| 1375.692 | 74137.06, | 100   | a14o (0.12) : y13 (-0.07)                    |
| 1376.672 | 35805.56, | 48.29 | a14* (0.12)                                  |
| 1451.637 | 872.02,   | 1.17  | b15-98 (-0.04)                               |
| 1455.540 | 3789.15,  | 5.11  |                                              |
| 1456.557 | 1772.03,  | 2.39  |                                              |
| 1549.451 | 2145.78,  | 2.89  | b15 (-0.21)                                  |
| 1550.478 | 975.17,   | 1.31  |                                              |
| 1860.735 | 1091.72,  | 1.47  |                                              |
| 1861.714 | 1070.63,  | 1.44  |                                              |

**S1127**

# ProPhosSI MS/MS report

Mass: 520.704584 Charge: 2+

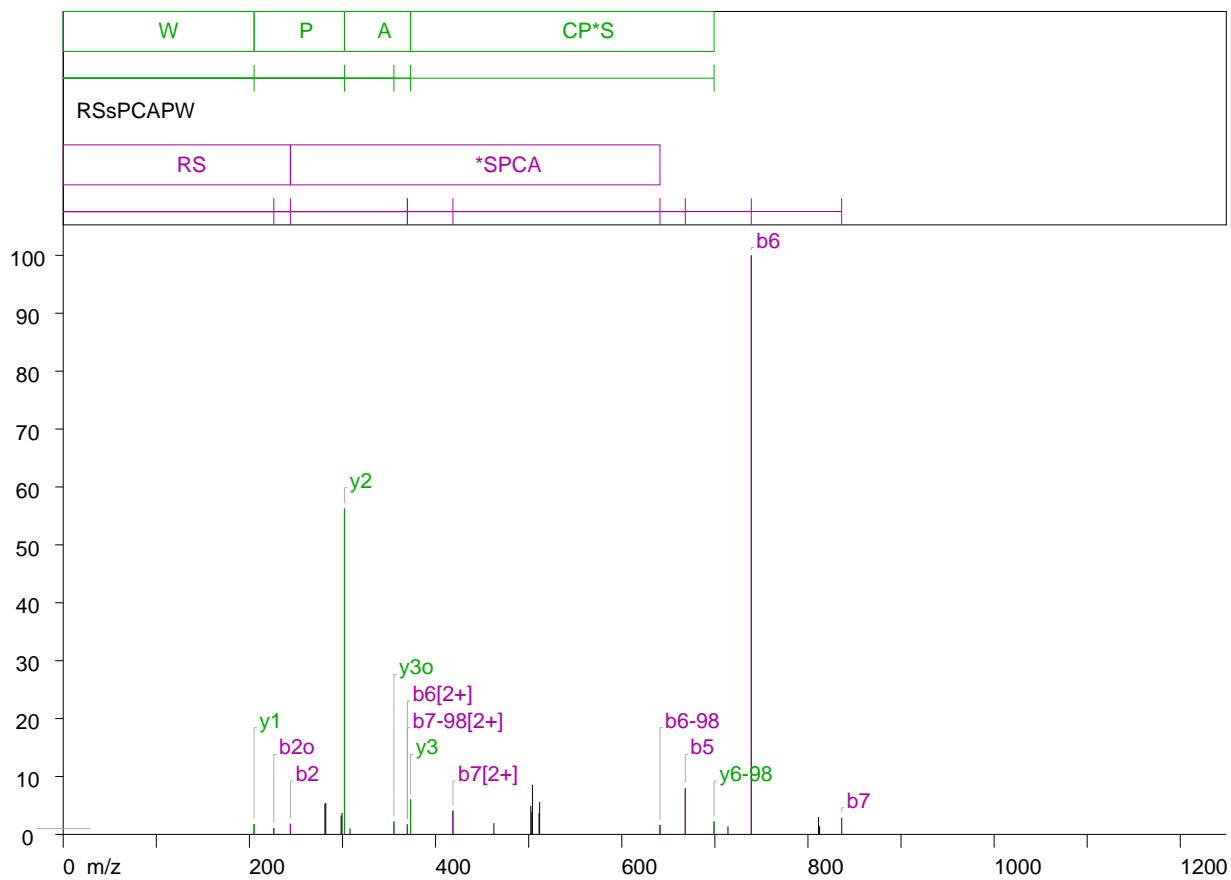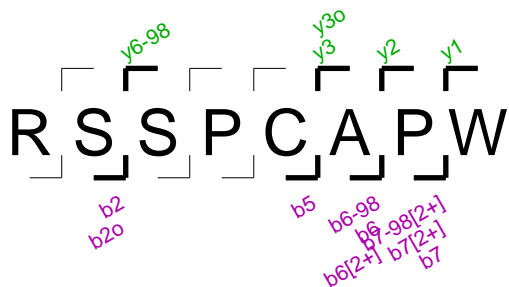

## Cav3.2 human

(21) 1125 RSsPCAPW 1132 1039.394 (-0.0011) Da

|                         |     |
|-------------------------|-----|
| Parent Ion              | m/z |
| No parent ions observed |     |

## Modifications and supporting evidence

| Position | Residue ID | Modification | Evidence               |
|----------|------------|--------------|------------------------|
| 3        | (1127)     | Phospho (ST) | b2=> b6-98, y3 =>y6-98 |

## Spectrum interpretation

| Rule                                   | passed/tests | Description                                                                                                                                                                                                                                                                                                                                                                                                                                                                                                                                                                                                                           |
|----------------------------------------|--------------|---------------------------------------------------------------------------------------------------------------------------------------------------------------------------------------------------------------------------------------------------------------------------------------------------------------------------------------------------------------------------------------------------------------------------------------------------------------------------------------------------------------------------------------------------------------------------------------------------------------------------------------|
| Parent ions present                    | 0/1          | Parent ions corresponding to the parent fragment - 1 phosphate ions were not found                                                                                                                                                                                                                                                                                                                                                                                                                                                                                                                                                    |
| Three -98 Ions present                 | 1/1          | 3 des-phospho fragment ions were found.                                                                                                                                                                                                                                                                                                                                                                                                                                                                                                                                                                                               |
| Unique -98 transitions present         | 1/1          | transition b2 to b6-98, transition y3 to y6-98 support unique phosphorylation at position 3<br><br/>                                                                                                                                                                                                                                                                                                                                                                                                                                                                                                                                  |
| Four Sequential b or y ions            | 0/1          | Sequence of four y or b ions not observed                                                                                                                                                                                                                                                                                                                                                                                                                                                                                                                                                                                             |
| Five of six sequential ions present    | 0/1          |                                                                                                                                                                                                                                                                                                                                                                                                                                                                                                                                                                                                                                       |
| Proline directed fragmentation pattern | 1/2          | NOTE: S-P is a low abundance fragmentation.<br>No proline ions at y5<br>No proline ions at b4-98<br/><br>PASS: y2> y1 with ratio 31.4<br/><br>FAIL: b7-98> b6-98<br/>                                                                                                                                                                                                                                                                                                                                                                                                                                                                 |
| PhosphoTyrosine transition present     | 0/0          | 0 of 0 phosphotyrosine transitions were found.                                                                                                                                                                                                                                                                                                                                                                                                                                                                                                                                                                                        |
| Six of top ten ions identified         | 6/6          | ion 1 (mass: 739.153: intensity: 17008.86) assigned 1 times<br>ion 2 (mass: 302.071: intensity: 9572.42) assigned 1 times<br>ion 3 (mass: 504.044: intensity: 1460.20) assigned 0 times<br>ion 4 (mass: 668.235: intensity: 1358.14) assigned 1 times<br>ion 5 (mass: 373.149: intensity: 1027.54) assigned 1 times<br>ion 6 (mass: 511.772: intensity: 951.29) assigned 0 times<br>ion 7 (mass: 282.061: intensity: 925.13) assigned 0 times<br>ion 8 (mass: 281.086: intensity: 902.76) assigned 1 times<br>ion 9 (mass: 502.264: intensity: 837.64) assigned 0 times<br>ion 10 (mass: 418.629: intensity: 696.96) assigned 1 times |

## Ion Table

15 ions assigned of 27 ions above threshold (55%).

### N-terminal ions

| AA | N-ion | b                      | b*      | b-98 | bo                     |
|----|-------|------------------------|---------|------|------------------------|
| R  | 1     | 157.108                | 140.082 | -    | 139.098                |
| S  | 2     | 244.140<br>244.038 (1) | 227.114 | -    | 226.130<br>226.218 (1) |

|   |   |                                               |         |                              |         |
|---|---|-----------------------------------------------|---------|------------------------------|---------|
| s | 3 | 411.139                                       | 394.112 | 313.153                      | 393.128 |
| P | 4 | 508.192                                       | 491.165 | 410.206                      | 490.181 |
| C | 5 | 668.222<br>668.235 (7)                        | 651.196 | 570.236                      | 650.212 |
| A | 6 | 739.259<br>739.153 (100)<br>*369.697 [2+] (1) | 722.233 | 641.273<br>641.048 (1)       | 721.249 |
| P | 7 | 836.312<br>418.629 [2+] (4)<br>836.187 (2)    | 819.286 | 738.326<br>*369.697 [2+] (1) | 818.302 |
| W | 8 | -                                             | -       | -                            | -       |

### C-terminal ions

| AA | C-ion | y                       | y*      | y-98                   | yo                     |
|----|-------|-------------------------|---------|------------------------|------------------------|
| R  | 8     | -                       | -       | -                      | -                      |
| S  | 7     | 884.301                 | 867.274 | 786.315                | 866.290                |
| s  | 6     | 797.269                 | 780.242 | 699.283<br>699.183 (2) | 779.258                |
| P  | 5     | 630.271                 | 613.244 | -                      | 612.260                |
| C  | 4     | 533.218                 | 516.191 | -                      | 515.207                |
| A  | 3     | 373.187<br>373.149 (6)  | 356.161 | -                      | 355.177<br>355.214 (2) |
| P  | 2     | 302.150<br>302.071 (56) | 285.123 | -                      | 284.139                |
| W  | 1     | 205.097<br>205.039 (1)  | 188.071 | -                      | 187.087                |

### Ion distribution

| Threshold | Ion count | Matches | % matched |
|-----------|-----------|---------|-----------|
| 0         | 54        | 19      | 35        |
| 0.5       | 41        | 19      | 46        |
| 1         | 27        | 15      | 55        |
| 2         | 18        | 9       | 50        |
| 3         | 14        | 6       | 42        |
| 4         | 10        | 6       | 60        |
| 5         | 8         | 5       | 62        |
| 10        | 2         | 2       | 100       |

### Observed ions > 1%

| m/z     | Intensity           | % max | Assignment (delta) |
|---------|---------------------|-------|--------------------|
| 205.039 | 304.77 <sub>s</sub> | 1.79  | y1 (-0.05)         |
| 226.218 | 181.94 <sub>s</sub> | 1.06  | b2o (0.08)         |
| 244.038 | 314.37 <sub>s</sub> | 1.84  | b2 (-0.10)         |
| 281.086 | 902.76 <sub>s</sub> | 5.30  | x4[2+] (-0.02)     |
| 282.061 | 925.13 <sub>s</sub> | 5.43  |                    |
| 298.477 | 553.95 <sub>s</sub> | 3.25  |                    |
| 299.483 | 629.25 <sub>s</sub> | 3.69  |                    |



|         |                       |       |                                   |
|---------|-----------------------|-------|-----------------------------------|
| 302.071 | 9572.42 <sub>3</sub>  | 56.27 | y2 (-0.07)                        |
| 308.117 | 178.28 <sub>3</sub>   | 1.04  |                                   |
| 355.214 | 378.39 <sub>3</sub>   | 2.22  | y3o (0.03)                        |
| 369.697 | 289.73 <sub>3</sub>   | 1.70  | b7-98[2+] (0.02) : b6[2+] (-0.43) |
| 373.149 | 1027.54 <sub>3</sub>  | 6.04  | y3 (-0.03)                        |
| 418.629 | 696.96 <sub>3</sub>   | 4.09  | b7[2+] (-0.03)                    |
| 462.647 | 330.55 <sub>3</sub>   | 1.94  | a4o (0.46)                        |
| 502.264 | 837.64 <sub>3</sub>   | 4.92  |                                   |
| 503.412 | 669.06 <sub>3</sub>   | 3.93  |                                   |
| 504.044 | 1460.20 <sub>3</sub>  | 8.58  |                                   |
| 511.137 | 621.62 <sub>3</sub>   | 3.65  |                                   |
| 511.772 | 951.29 <sub>3</sub>   | 5.59  |                                   |
| 641.048 | 276.09 <sub>3</sub>   | 1.62  | b6-98 (-0.22)                     |
| 668.235 | 1358.14 <sub>3</sub>  | 7.98  | b5 (0.01)                         |
| 699.183 | 375.89 <sub>3</sub>   | 2.20  | y6-98 (-0.10)                     |
| 714.112 | 236.32 <sub>3</sub>   | 1.38  |                                   |
| 739.153 | 17008.86 <sub>3</sub> | 100   | b6 (-0.10)                        |
| 811.339 | 511.32 <sub>3</sub>   | 3.00  |                                   |
| 812.493 | 240.32 <sub>3</sub>   | 1.41  |                                   |
| 836.187 | 489.39 <sub>3</sub>   | 2.87  | b7 (-0.12)                        |

**S1144**

# ProPhosSI MS/MS report

Mass: 558.253623 Charge: 2+

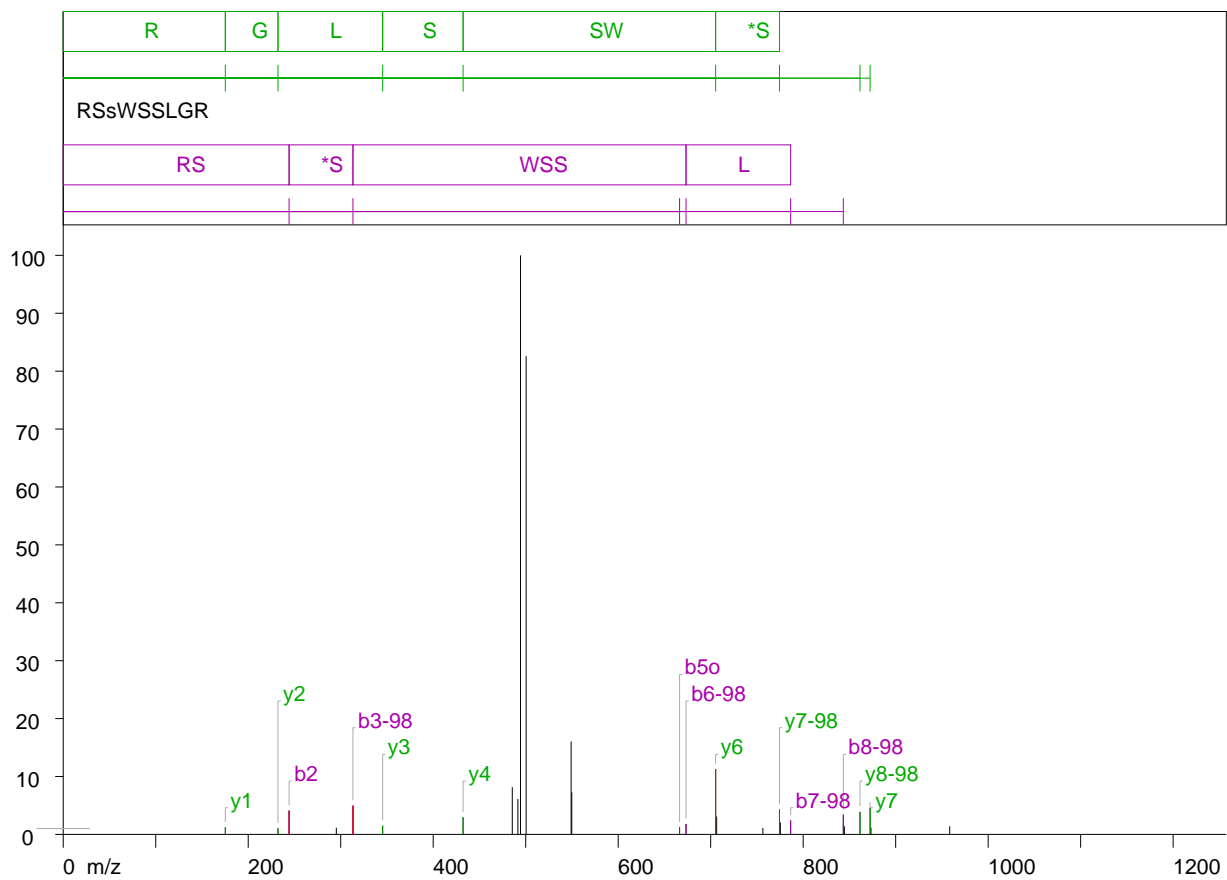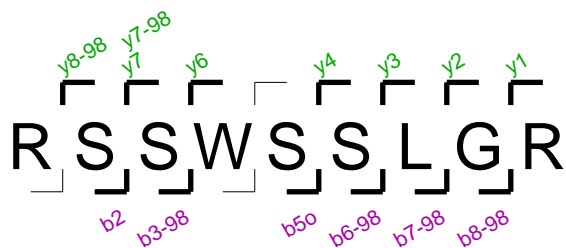

## Cav3.2 human

(44) 1142  $\text{RSsWSSLGR}$  1150 1114.492 (-0.0004) Da

|                         |     |
|-------------------------|-----|
| Parent Ion              | m/z |
| No parent ions observed |     |

## Modifications and supporting evidence

| Position | Residue ID | Modification | Evidence                  |
|----------|------------|--------------|---------------------------|
| 3        | (1144)     | Phospho (ST) | b2 => b3-98 : y6 => y7-98 |

## Spectrum interpretation

| Rule                                   | passed/tests | Description                                                                                                                                                                                                                                                                                                                                                                                                                                                                                                                                                                                                                                 |
|----------------------------------------|--------------|---------------------------------------------------------------------------------------------------------------------------------------------------------------------------------------------------------------------------------------------------------------------------------------------------------------------------------------------------------------------------------------------------------------------------------------------------------------------------------------------------------------------------------------------------------------------------------------------------------------------------------------------|
| Parent ions present                    | 0/1          | Parent ions corresponding to the parent fragment - 1 phosphate ions were not found                                                                                                                                                                                                                                                                                                                                                                                                                                                                                                                                                          |
| Three -98 Ions present                 | 1/1          | 6 des-phospho fragment ions were found.                                                                                                                                                                                                                                                                                                                                                                                                                                                                                                                                                                                                     |
| Unique -98 transitions present         | 1/1          | transition b2 to b3-98, transition y6 to y7-98 support unique phosphorylation at position 3<br><br/>                                                                                                                                                                                                                                                                                                                                                                                                                                                                                                                                        |
| Four Sequential b or y ions            | 1/1          | Sequence of four y ions found from y1 to y4.                                                                                                                                                                                                                                                                                                                                                                                                                                                                                                                                                                                                |
| Five of six sequential ions present    | 1/1          | Five of Six ions found between y1 and y6<br>Five of Six ions found between y2 and y7<br>Five of Six ions found between y3 and y8                                                                                                                                                                                                                                                                                                                                                                                                                                                                                                            |
| Proline directed fragmentation pattern | 0/0          |                                                                                                                                                                                                                                                                                                                                                                                                                                                                                                                                                                                                                                             |
| PhosphoTyrosine transition present     | 0/0          | 0 of 0 phosphotyrosine transitions were found.                                                                                                                                                                                                                                                                                                                                                                                                                                                                                                                                                                                              |
| Six of top ten ions identified         | 5/6          | ion 1 (mass: 494.401: intensity: 58056.20) assigned 1 times<br>ion 2 (mass: 500.456: intensity: 47943.19) assigned 0 times<br>ion 3 (mass: 549.103: intensity: 9318.38) assigned 0 times<br>ion 4 (mass: 705.366: intensity: 6557.82) assigned 1 times<br>ion 5 (mass: 485.512: intensity: 4732.32) assigned 0 times<br>ion 6 (mass: 549.801: intensity: 4211.59) assigned 0 times<br>ion 7 (mass: 491.544: intensity: 3548.09) assigned 0 times<br>ion 8 (mass: 313.239: intensity: 2883.58) assigned 1 times<br>ion 9 (mass: 872.364: intensity: 2669.37) assigned 1 times<br>ion 10 (mass: 774.388: intensity: 2506.29) assigned 1 times |

## Ion Table

16 ions assigned of 27 ions above threshold (59%).

### N-terminal ions

| AA | N-ion | b                      | b*      | b-98                   | bo                     |
|----|-------|------------------------|---------|------------------------|------------------------|
| R  | 1     | 157.108                | 140.082 | -                      | 139.098                |
| S  | 2     | 244.140<br>244.186 (4) | 227.114 | -                      | 226.130                |
| s  | 3     | 411.139                | 394.112 | 313.153<br>313.239 (4) | 393.128                |
| W  | 4     | 597.218                | 580.192 | 499.232                | 579.208                |
| S  | 5     | 684.250                | 667.224 | 586.264                | 666.240<br>666.366 (1) |
| S  | 6     | 771.282                | 754.256 | 673.296<br>673.339 (1) | 753.272                |
| L  | 7     | 884.366                | 867.340 | 786.380<br>786.455 (2) | 866.356                |
| G  | 8     | 941.388                | 924.361 | 843.402<br>843.394 (3) | 923.377                |
| R  | 9     | -                      | -       | -                      | -                      |

### C-terminal ions

| AA | C-ion | y                       | y*      | y-98                   | yo      |
|----|-------|-------------------------|---------|------------------------|---------|
| R  | 9     | -                       | -       | -                      | -       |
| S  | 8     | 959.398                 | 942.372 | 861.412<br>861.422 (3) | 941.388 |
| s  | 7     | 872.366<br>872.364 (4)  | 855.340 | 774.380<br>774.388 (4) | 854.356 |
| W  | 6     | 705.368<br>705.366 (11) | 688.341 | -                      | 687.357 |
| S  | 5     | 519.289                 | 502.262 | -                      | 501.278 |
| S  | 4     | 432.257<br>432.326 (2)  | 415.230 | -                      | 414.246 |
| L  | 3     | 345.225<br>345.352 (1)  | 328.198 | -                      | 327.214 |
| G  | 2     | 232.140<br>232.192 (1)  | 215.114 | -                      | 214.130 |
| R  | 1     | 175.119<br>175.248 (1)  | 158.092 | -                      | 157.108 |

### Ion distribution

| Threshold | Ion count | Matches | % matched |
|-----------|-----------|---------|-----------|
| 0         | 52        | 24      | 46        |
| 0.5       | 44        | 23      | 52        |
| 1         | 27        | 16      | 59        |
| 2         | 17        | 10      | 58        |
| 3         | 14        | 8       | 57        |
| 4         | 11        | 6       | 54        |
| 5         | 7         | 2       | 28        |
| 10        | 4         | 2       | 50        |

### Observed ions > 1%

| m/z     | Intensity             | % max | Assignment (delta) |
|---------|-----------------------|-------|--------------------|
| 175.248 | 709.61 <sub>3</sub>   | 1.22  | y1 (0.12)          |
| 232.192 | 619.74 <sub>3</sub>   | 1.06  | y2 (0.05)          |
| 244.186 | 2389.84 <sub>3</sub>  | 4.11  | b2 (0.04)          |
| 295.273 | 669.73 <sub>3</sub>   | 1.15  |                    |
| 313.239 | 2883.58 <sub>3</sub>  | 4.96  | b3-98 (0.08)       |
| 345.352 | 875.88 <sub>3</sub>   | 1.50  | y3 (0.12)          |
| 432.326 | 1726.42 <sub>3</sub>  | 2.97  | y4 (0.06)          |
| 485.512 | 4732.32 <sub>3</sub>  | 8.15  |                    |
| 491.544 | 3548.09 <sub>3</sub>  | 6.11  |                    |
| 494.401 | 58056.20 <sub>3</sub> | 100   | x8[2+] (0.20)      |
| 500.456 | 47943.19 <sub>3</sub> | 82.58 |                    |
| 549.103 | 9318.38 <sub>3</sub>  | 16.05 |                    |
| 549.801 | 4211.59 <sub>3</sub>  | 7.25  |                    |
| 666.366 | 711.48 <sub>3</sub>   | 1.22  | b5o (0.12)         |
| 673.339 | 1045.11 <sub>3</sub>  | 1.80  | b6-98 (0.04)       |
| 705.366 | 6557.82 <sub>3</sub>  | 11.29 | y6 (-0.00)         |
| 706.461 | 1788.73 <sub>3</sub>  | 3.08  |                    |
| 756.425 | 643.28 <sub>3</sub>   | 1.10  |                    |
| 774.388 | 2506.29 <sub>3</sub>  | 4.31  | y7-98 (0.00)       |
| 775.342 | 1194.20 <sub>3</sub>  | 2.05  |                    |
| 786.455 | 1403.29 <sub>3</sub>  | 2.41  | b7-98 (0.07)       |
| 843.394 | 1976.00 <sub>3</sub>  | 3.40  | b8-98 (-0.00)      |
| 844.555 | 816.75 <sub>3</sub>   | 1.40  |                    |
| 861.422 | 2267.00 <sub>3</sub>  | 3.90  | y8-98 (0.00)       |
| 872.364 | 2669.37 <sub>3</sub>  | 4.59  | y7 (-0.00)         |
| 873.304 | 681.85 <sub>3</sub>   | 1.17  |                    |
| 958.437 | 817.91 <sub>3</sub>   | 1.40  | c8 (0.02)          |

S1174 and  
S1175  
(diP)

# ProPhosSI MS/MS report

Mass: 737.947954 Charge: 3+

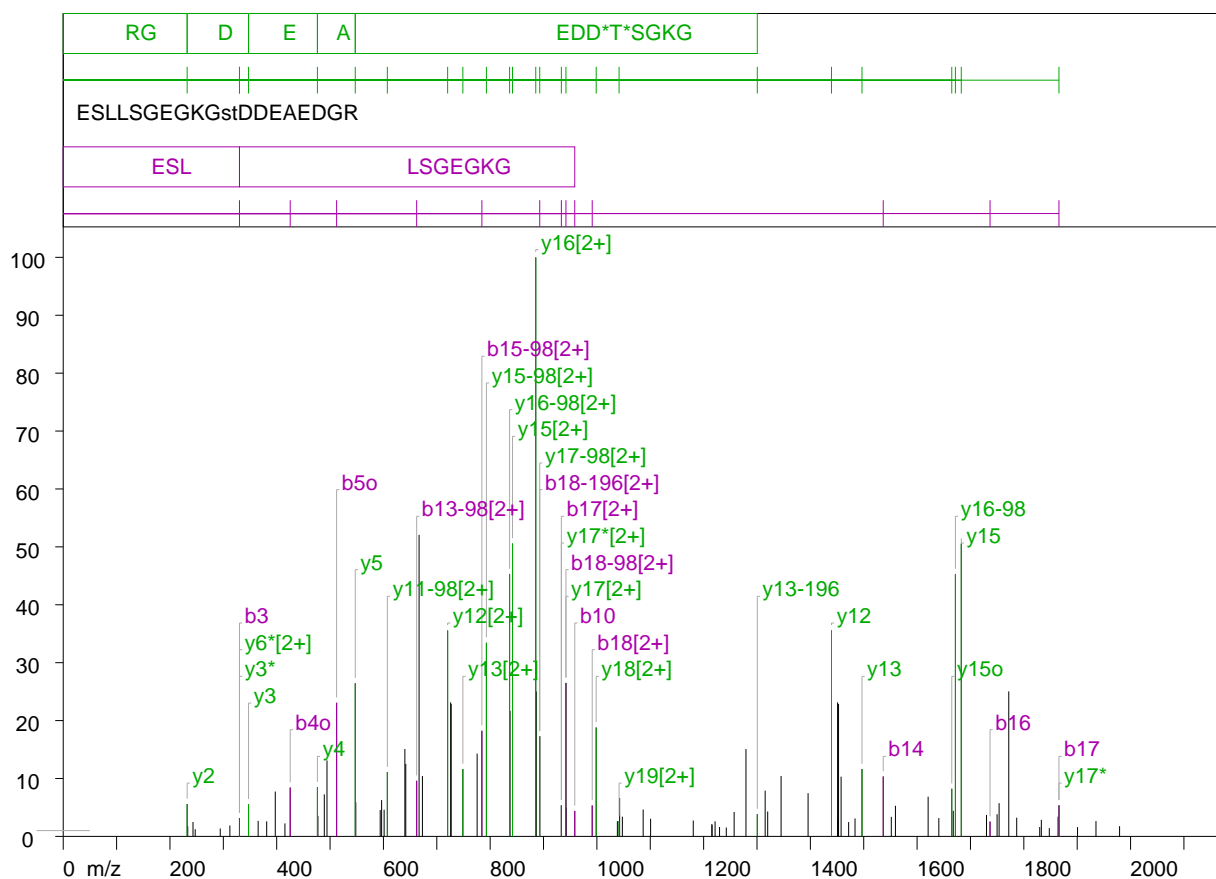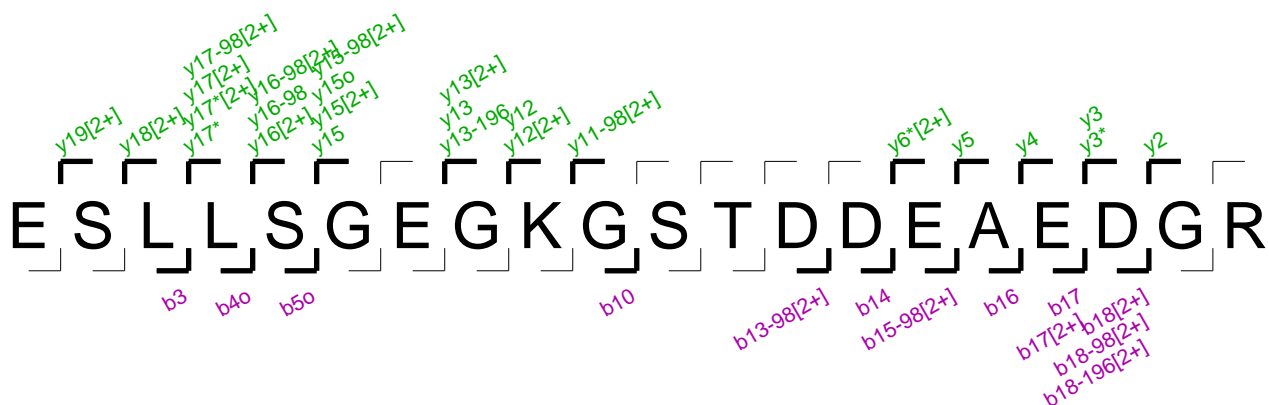



## Cav3.2 human

(21) 1164 ESLLSGEGKGstDDEAEDGR 1183 2210.825 (-0.0050) Da

| Parent Ion              | m/z |
|-------------------------|-----|
| No parent ions observed |     |

## Modifications and supporting evidence

| Position | Residue ID | Modification | Evidence    |
|----------|------------|--------------|-------------|
| 11       | (1174)     | Phospho (ST) | y5=>y13-196 |
| 12       | (1175)     | Phospho (ST) |             |

## Spectrum interpretation

| Rule                                   | passed/tests | Description                                                                                                                                                                                                                                                                                                                                                                                                                                                                                                                                                                                                                        |
|----------------------------------------|--------------|------------------------------------------------------------------------------------------------------------------------------------------------------------------------------------------------------------------------------------------------------------------------------------------------------------------------------------------------------------------------------------------------------------------------------------------------------------------------------------------------------------------------------------------------------------------------------------------------------------------------------------|
| Parent ions present                    | 0/1          | Parent ions corresponding to the parent fragment - 2 phosphate ions were not found                                                                                                                                                                                                                                                                                                                                                                                                                                                                                                                                                 |
| Three -98 Ions present                 | 0/1          | 2 des-phospho fragment ions were found.                                                                                                                                                                                                                                                                                                                                                                                                                                                                                                                                                                                            |
| Unique -98 transitions present         |              | transition y5 to y13-196 support phosphorylation at position 11 and 12                                                                                                                                                                                                                                                                                                                                                                                                                                                                                                                                                             |
| Four Sequential b or y ions            | 1/1          | Sequence of four y ions found from y2 to y5.                                                                                                                                                                                                                                                                                                                                                                                                                                                                                                                                                                                       |
| Five of six sequential ions present    | 0/1          |                                                                                                                                                                                                                                                                                                                                                                                                                                                                                                                                                                                                                                    |
| Proline directed fragmentation pattern | 0/0          |                                                                                                                                                                                                                                                                                                                                                                                                                                                                                                                                                                                                                                    |
| PhosphoTyrosine transition present     | 0/0          | 0 of 0 phosphotyrosine transitions were found.                                                                                                                                                                                                                                                                                                                                                                                                                                                                                                                                                                                     |
| Six of top ten ions identified         | 9/6          | ion 1 (mass: 885.449; intensity: 824.95) assigned 1 times<br>ion 2 (mass: 666.807; intensity: 429.60) assigned 0 times<br>ion 3 (mass: 1682.814; intensity: 417.22) assigned 2 times<br>ion 4 (mass: 841.911; intensity: 417.22) assigned 2 times<br>ion 5 (mass: 1671.807; intensity: 373.57) assigned 1 times<br>ion 6 (mass: 836.407; intensity: 373.57) assigned 1 times<br>ion 7 (mass: 720.302; intensity: 293.35) assigned 1 times<br>ion 8 (mass: 1439.597; intensity: 293.35) assigned 1 times<br>ion 9 (mass: 792.949; intensity: 275.85) assigned 1 times<br>ion 10 (mass: 942.007; intensity: 218.63) assigned 3 times |

## Ion Table

41 ions assigned of 87 ions above threshold (47%).

### N-terminal ions

| AA | N-ion | b                                              | b*       | b-196                          | b-98                           | bo                      |
|----|-------|------------------------------------------------|----------|--------------------------------|--------------------------------|-------------------------|
| E  | 1     | 130.050                                        | 113.023  | -                              | -                              | 112.039                 |
| S  | 2     | 217.082                                        | 200.055  | -                              | -                              | 199.071                 |
| L  | 3     | 330.166<br>*330.256 (3)                        | 313.139  | -                              | -                              | 312.155                 |
| L  | 4     | 443.250                                        | 426.224  | -                              | -                              | 425.240<br>425.305 (8)  |
| S  | 5     | 530.282                                        | 513.256  | -                              | -                              | 512.272<br>512.301 (23) |
| G  | 6     | 587.304                                        | 570.277  | -                              | -                              | 569.293                 |
| E  | 7     | 716.346                                        | 699.320  | -                              | -                              | 698.336                 |
| G  | 8     | 773.368                                        | 756.341  | -                              | -                              | 755.357                 |
| K  | 9     | 901.463                                        | 884.436  | -                              | -                              | 883.452                 |
| G  | 10    | 958.484<br>958.524 (4)                         | 941.458  | -                              | -                              | 940.474                 |
| s  | 11    | 1125.482                                       | 1108.456 | -                              | 1027.497                       | 1107.472                |
| t  | 12    | 1306.496                                       | 1289.470 | 1110.525                       | 1208.511                       | 1288.486                |
| D  | 13    | 1421.523                                       | 1404.497 | 1225.552                       | 1323.537<br>*662.258 [2+] (9)  | 1403.513                |
| D  | 14    | 1536.550<br>1536.579 (10)                      | 1519.524 | 1340.579                       | 1438.564                       | 1518.540                |
| E  | 15    | 1665.593                                       | 1648.566 | 1469.621                       | 1567.607<br>784.462 [2+] (18)  | 1647.582                |
| A  | 16    | 1736.630<br>1736.704 (2)                       | 1719.603 | 1540.658                       | 1638.644                       | 1718.619                |
| E  | 17    | 1865.673<br>*1865.850 (5)<br>*933.428 [2+] (5) | 1848.646 | 1669.701                       | 1767.687                       | 1847.662                |
| D  | 18    | 1980.700<br>991.235 [2+] (5)                   | 1963.673 | 1784.728<br>*892.877 [2+] (17) | 1882.714<br>*942.007 [2+] (26) | 1962.689                |
| G  | 19    | 2037.721                                       | 2020.695 | 1841.749                       | 1939.735                       | 2019.710                |
| R  | 20    | -                                              | -        | -                              | -                              | -                       |

### C-terminal ions

| AA | C-ion | y                                                | y*                                             | y-196                    | y-98                                           | yo                       |
|----|-------|--------------------------------------------------|------------------------------------------------|--------------------------|------------------------------------------------|--------------------------|
| E  | 20    | -                                                | -                                              | -                        | -                                              | -                        |
| S  | 19    | 2082.790<br>1041.575 [2+] (2)                    | 2065.764                                       | 1886.818                 | 1984.804                                       | 2064.780                 |
| L  | 18    | 1995.758<br>998.672 [2+] (18)                    | 1978.732                                       | 1799.786                 | 1897.772                                       | 1977.748                 |
| L  | 17    | 1882.674<br>*942.007 [2+] (26)                   | 1865.647<br>*1865.850 (5)<br>*933.428 [2+] (5) | 1686.702                 | 1784.688<br>*892.877 [2+] (17)                 | 1864.663                 |
| S  | 16    | 1769.590<br>885.449 [2+] (100)                   | 1752.563                                       | 1573.618                 | 1671.604<br>1671.807 (45)<br>836.407 [2+] (45) | 1751.579                 |
| G  | 15    | 1682.558<br>*1682.814 (50)<br>*841.911 [2+] (50) | 1665.531                                       | 1486.586                 | 1584.572<br>792.949 [2+] (33)                  | 1664.547<br>1664.959 (8) |
| E  | 14    | 1625.536                                         | 1608.510                                       | 1429.565                 | 1527.551                                       | 1607.526                 |
| G  | 13    | 1496.494<br>1496.717 (11)<br>748.862 [2+] (11)   | 1479.467                                       | 1300.522<br>1300.565 (3) | 1398.508                                       | 1478.483                 |
| K  | 12    | 1439.472<br>720.302 [2+] (35)<br>1439.597 (35)   | 1422.446                                       | 1243.501                 | 1341.486                                       | 1421.462                 |

|   |    |                          |                              |          |                               |          |
|---|----|--------------------------|------------------------------|----------|-------------------------------|----------|
| G | 11 | 1311.377                 | 1294.351                     | 1115.406 | 1213.392<br>607.348 [2+] (11) | 1293.367 |
| s | 10 | 1254.356                 | 1237.329                     | 1058.384 | 1156.370                      | 1236.345 |
| t | 9  | 1087.358                 | 1070.331                     | -        | 989.372                       | 1069.347 |
| D | 8  | 906.344                  | 889.317                      | -        | -                             | 888.333  |
| D | 7  | 791.317                  | 774.290                      | -        | -                             | 773.306  |
| E | 6  | 676.290                  | 659.263<br>*330.256 [2+] (3) | -        | -                             | 658.279  |
| A | 5  | 547.247<br>*547.242 (26) | 530.221                      | -        | -                             | 529.237  |
| E | 4  | 476.210<br>476.299 (8)   | 459.183                      | -        | -                             | 458.199  |
| D | 3  | 347.167<br>*347.256 (5)  | 330.141<br>*330.256 (3)      | -        | -                             | 329.157  |
| G | 2  | 232.140<br>232.208 (5)   | 215.114                      | -        | -                             | 214.130  |
| R | 1  | 175.119                  | 158.092                      | -        | -                             | 157.108  |

### Ion distribution

| Threshold | Ion count | Matches | % matched |
|-----------|-----------|---------|-----------|
| 0         | 98        | 44      | 44        |
| 0.5       | 98        | 44      | 44        |
| 1         | 98        | 44      | 44        |
| 2         | 87        | 41      | 47        |
| 3         | 74        | 36      | 48        |
| 4         | 61        | 34      | 55        |
| 5         | 53        | 33      | 62        |
| 10        | 34        | 21      | 61        |

### Observed ions > 1%

| m/z     | Intensity          | % max | Assignment (delta)                                                  |
|---------|--------------------|-------|---------------------------------------------------------------------|
| 232.208 | 46.04 <sub>,</sub> | 5.58  | y2 (0.06)                                                           |
| 233.309 | 14.42 <sub>,</sub> | 1.74  |                                                                     |
| 243.176 | 20.48 <sub>,</sub> | 2.48  | a5*[2+] (0.04)                                                      |
| 247.285 | 10.26 <sub>,</sub> | 1.24  |                                                                     |
| 294.216 | 11.25 <sub>,</sub> | 1.36  | b6[2+] (0.06)                                                       |
| 312.262 | 15.53 <sub>,</sub> | 1.88  | b3o (0.10)                                                          |
| 330.256 | 26.23 <sub>,</sub> | 3.17  | z6[2+] (0.12) : y6*[2+] (0.12) : y3* (0.11) : z3 (0.11) : b3 (0.08) |
| 347.256 | 45.71 <sub>,</sub> | 5.54  | y3 (0.08) : c3 (0.06)                                               |
| 365.268 | 22.08 <sub>,</sub> | 2.67  |                                                                     |
| 381.217 | 21.42 <sub>,</sub> | 2.59  |                                                                     |
| 397.344 | 63.88 <sub>,</sub> | 7.74  | a4o (0.09)                                                          |
| 415.408 | 18.51 <sub>,</sub> | 2.24  | a4 (0.15)                                                           |
| 425.305 | 69.54 <sub>,</sub> | 8.42  | b4o (0.06)                                                          |
| 476.299 | 70.14 <sub>,</sub> | 8.50  | y4 (0.08)                                                           |

|          |                     |       |                                                     |
|----------|---------------------|-------|-----------------------------------------------------|
| 477.251  | 29.25 <sub>3</sub>  | 3.54  |                                                     |
| 489.205  | 59.84 <sub>3</sub>  | 7.25  |                                                     |
| 494.221  | 108.17 <sub>3</sub> | 13.11 |                                                     |
| 512.301  | 190.34 <sub>3</sub> | 23.07 | b5o (0.02)                                          |
| 547.242  | 218.22 <sub>3</sub> | 26.45 | y5 (-0.00) : c5 (-0.06)                             |
| 548.231  | 48.54 <sub>3</sub>  | 5.88  |                                                     |
| 593.966  | 37.53 <sub>3</sub>  | 4.54  |                                                     |
| 596.610  | 51.74 <sub>3</sub>  | 6.27  |                                                     |
| 601.291  | 38.02 <sub>3</sub>  | 4.60  |                                                     |
| 607.348  | 91.46 <sub>3</sub>  | 11.08 | y11-98[2+] (0.14)                                   |
| 640.172  | 124.45 <sub>3</sub> | 15.08 | a12[2+] (0.41)                                      |
| 641.872  | 103.31 <sub>3</sub> | 12.52 | x10[2+] (0.19)                                      |
| 662.258  | 79.27 <sub>3</sub>  | 9.60  | c12[2+] (-0.00) : b13-98[2+] (-0.01)                |
| 666.807  | 429.60 <sub>3</sub> | 52.07 |                                                     |
| 673.068  | 86.04 <sub>3</sub>  | 10.42 |                                                     |
| 720.302  | 293.35 <sub>3</sub> | 35.55 | y12[2+] (0.06)                                      |
| 725.991  | 190.97 <sub>3</sub> | 23.14 |                                                     |
| 726.904  | 188.67 <sub>3</sub> | 22.87 | a8o (-0.45)                                         |
| 748.862  | 96.01 <sub>3</sub>  | 11.63 | y13[2+] (0.11)                                      |
| 775.582  | 117.89 <sub>3</sub> | 14.29 |                                                     |
| 784.462  | 150.48 <sub>3</sub> | 18.24 | b15-98[2+] (0.15)                                   |
| 792.949  | 275.85 <sub>3</sub> | 33.43 | y15-98[2+] (0.15)                                   |
| 836.407  | 373.57 <sub>3</sub> | 45.28 | y16-98[2+] (0.10)                                   |
| 837.210  | 178.72 <sub>3</sub> | 21.66 |                                                     |
| 841.911  | 417.22 <sub>3</sub> | 50.57 | y15[2+] (0.12) : c15[2+] (0.09)                     |
| 885.449  | 824.95 <sub>3</sub> | 100   | y16[2+] (0.14)                                      |
| 886.382  | 206.58 <sub>3</sub> | 25.04 |                                                     |
| 892.877  | 142.51 <sub>3</sub> | 17.27 | y17-98[2+] (0.02) : b18-196[2+] (0.00)              |
| 933.428  | 44.23 <sub>3</sub>  | 5.36  | y17*[2+] (0.10) : z17[2+] (0.10) : b17[2+] (0.08)   |
| 942.007  | 218.63 <sub>3</sub> | 26.50 | y17[2+] (0.16) : c17[2+] (0.15) : b18-98[2+] (0.14) |
| 942.953  | 40.86 <sub>3</sub>  | 4.95  |                                                     |
| 958.524  | 36.31 <sub>3</sub>  | 4.40  | b10 (0.03)                                          |
| 991.235  | 44.06 <sub>3</sub>  | 5.34  | b18[2+] (0.38)                                      |
| 998.672  | 155.22 <sub>3</sub> | 18.81 | y18[2+] (0.28)                                      |
| 1038.391 | 21.79 <sub>3</sub>  | 2.64  |                                                     |
| 1041.575 | 21.94 <sub>3</sub>  | 2.65  | y19[2+] (-0.32)                                     |
| 1042.613 | 54.80 <sub>3</sub>  | 6.64  |                                                     |
| 1047.729 | 28.09 <sub>3</sub>  | 3.40  |                                                     |
| 1086.681 | 38.34 <sub>3</sub>  | 4.64  |                                                     |
| 1100.623 | 25.13 <sub>3</sub>  | 3.04  |                                                     |

|          |         |       |                                          |
|----------|---------|-------|------------------------------------------|
| 1180.570 | 22.60,  | 2.73  |                                          |
| 1215.502 | 17.74,  | 2.15  |                                          |
| 1215.722 | 16.01,  | 1.94  |                                          |
| 1221.455 | 21.49,  | 2.60  |                                          |
| 1229.826 | 13.38,  | 1.62  |                                          |
| 1242.465 | 12.65,  | 1.53  |                                          |
| 1257.186 | 34.78,  | 4.21  |                                          |
| 1279.336 | 124.45, | 15.08 |                                          |
| 1300.565 | 31.73,  | 3.84  | y13-196 (0.04)                           |
| 1315.297 | 65.18,  | 7.90  |                                          |
| 1320.058 | 35.46,  | 4.29  |                                          |
| 1345.130 | 86.04,  | 10.42 |                                          |
| 1395.726 | 61.54,  | 7.45  |                                          |
| 1439.597 | 293.35, | 35.55 | y12 (0.12)                               |
| 1450.975 | 190.97, | 23.14 |                                          |
| 1451.558 | 24.90,  | 3.01  |                                          |
| 1452.800 | 188.67, | 22.87 |                                          |
| 1457.583 | 85.10,  | 10.31 |                                          |
| 1471.750 | 20.43,  | 2.47  |                                          |
| 1483.688 | 25.59,  | 3.10  |                                          |
| 1496.717 | 96.01,  | 11.63 | y13 (0.22)                               |
| 1536.579 | 85.38,  | 10.34 | b14 (0.02)                               |
| 1551.659 | 27.82,  | 3.37  |                                          |
| 1559.400 | 43.64,  | 5.29  |                                          |
| 1620.654 | 56.58,  | 6.85  | a15* (0.08)                              |
| 1640.708 | 26.09,  | 3.16  |                                          |
| 1664.959 | 67.92,  | 8.23  | y15o (0.41)                              |
| 1667.740 | 36.43,  | 4.41  |                                          |
| 1671.807 | 373.57, | 45.28 | y16-98 (0.20)                            |
| 1682.814 | 417.22, | 50.57 | y15 (0.25) : c15 (0.19)                  |
| 1730.075 | 30.63,  | 3.71  |                                          |
| 1736.704 | 21.07,  | 2.55  | b16 (0.07)                               |
| 1749.875 | 31.58,  | 3.82  |                                          |
| 1753.653 | 47.34,  | 5.73  | c16 (-0.00)                              |
| 1771.756 | 206.58, | 25.04 |                                          |
| 1786.667 | 26.66,  | 3.23  |                                          |
| 1829.816 | 13.36,  | 1.61  |                                          |
| 1832.770 | 23.58,  | 2.85  |                                          |
| 1847.752 | 11.74,  | 1.42  | b17o (0.08)                              |
| 1864.114 | 28.05,  | 3.40  |                                          |
| 1865.850 | 44.23,  | 5.36  | y17* (0.20) : z17 (0.20) :<br>b17 (0.17) |
| 1900.648 | 13.20,  | 1.60  |                                          |

|          |       |      |              |
|----------|-------|------|--------------|
| 1935.211 | 21.82 | 2.64 | a18* (-0.46) |
| 1979.411 | 14.61 | 1.77 |              |

S1198

# ProPhosSI MS/MS report

Mass: 463.904575 Charge: 3+

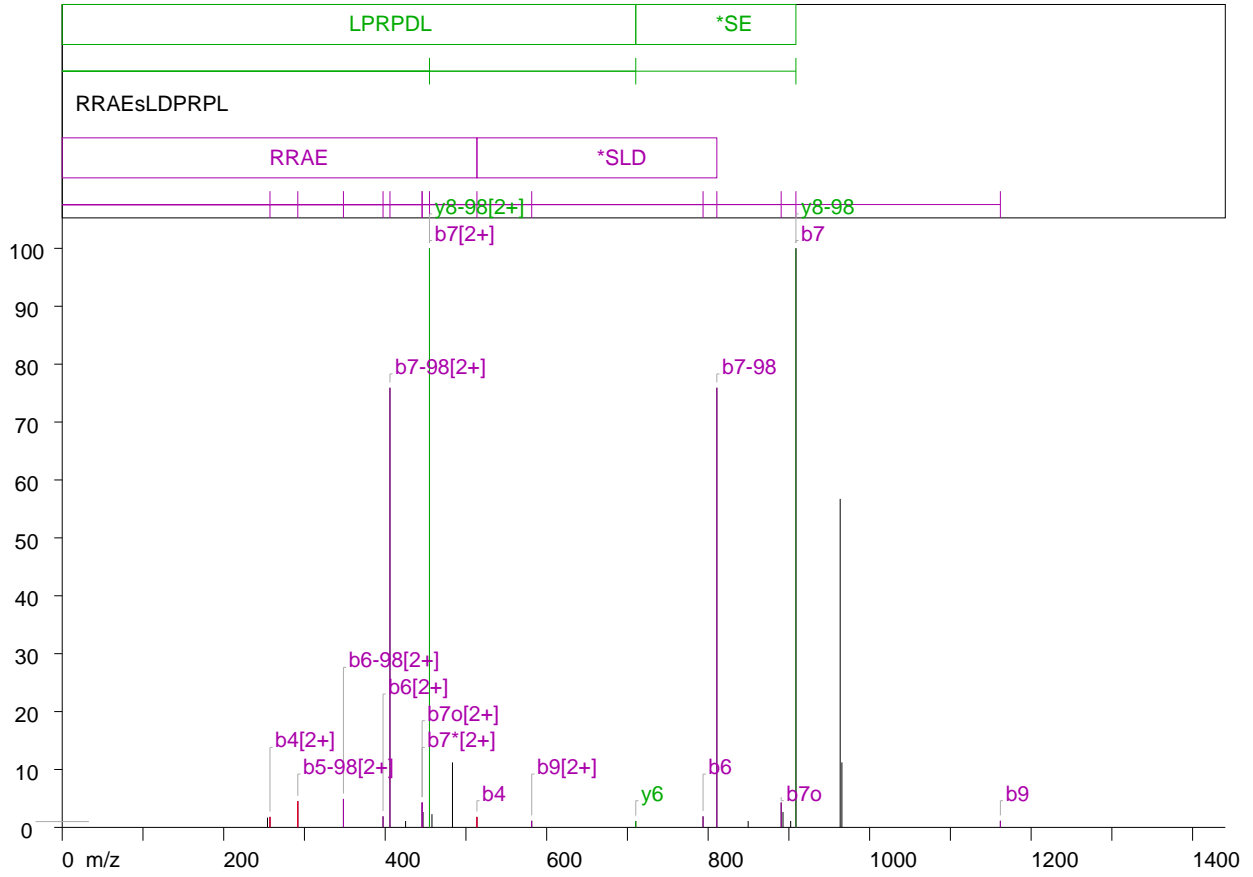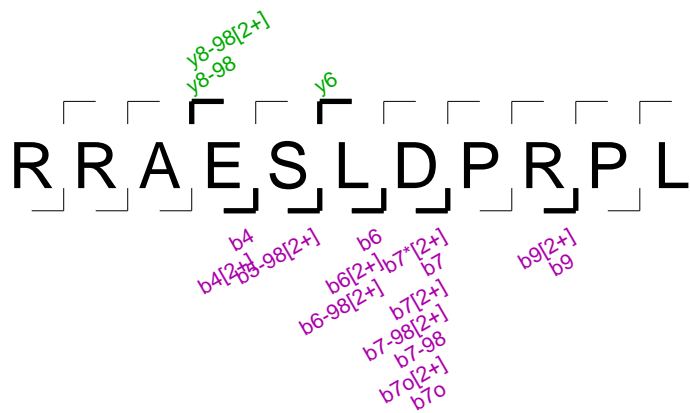



## Cav3.2 human

(34) 1194 RRAE<sup>+</sup>LDPRPL 1204 1388.692 (-0.0023) Da

|                         |     |
|-------------------------|-----|
| Parent Ion              | m/z |
| No parent ions observed |     |

## Modifications and supporting evidence

| Position | Residue ID | Modification | Evidence        |
|----------|------------|--------------|-----------------|
| 5        | (1198)     | Phospho (ST) | b4 => b5-98[2+] |

## Spectrum interpretation

| Rule                                   | passed/tests | Description                                                                                                                                                                                                                                                                                                                                                                                                                                                                                                                                                                                                                                    |
|----------------------------------------|--------------|------------------------------------------------------------------------------------------------------------------------------------------------------------------------------------------------------------------------------------------------------------------------------------------------------------------------------------------------------------------------------------------------------------------------------------------------------------------------------------------------------------------------------------------------------------------------------------------------------------------------------------------------|
| Parent ions present                    | 0/1          | Parent ions corresponding to the parent fragment - 1 phosphate ions were not found                                                                                                                                                                                                                                                                                                                                                                                                                                                                                                                                                             |
| Three -98 Ions present                 | 1/1          | 4 des-phospho fragment ions were found.                                                                                                                                                                                                                                                                                                                                                                                                                                                                                                                                                                                                        |
| Unique -98 transitions present         | 1/1          | transition b4 to b5-98[2+] supports phosphorylation at position 5<br><br/>                                                                                                                                                                                                                                                                                                                                                                                                                                                                                                                                                                     |
| Four Sequential b or y ions            | 1/1          | Sequence of four b ions found from b4 to b7-98.                                                                                                                                                                                                                                                                                                                                                                                                                                                                                                                                                                                                |
| Five of six sequential ions present    | 0/1          |                                                                                                                                                                                                                                                                                                                                                                                                                                                                                                                                                                                                                                                |
| Proline directed fragmentation pattern | 1/1          | No proline ions at y4<br>PASS: b8-98< b7-98<br/><br>No proline ions at y2<br>No proline ions at b10-98<br/>                                                                                                                                                                                                                                                                                                                                                                                                                                                                                                                                    |
| PhosphoTyrosine transition present     | 0/0          | 0 of 0 phosphotyrosine transitions were found.                                                                                                                                                                                                                                                                                                                                                                                                                                                                                                                                                                                                 |
| Six of top ten ions identified         | 7/6          | ion 1 (mass: 908.671: intensity: 42897.06) assigned 2 times<br>ion 2 (mass: 454.839: intensity: 42897.06) assigned 2 times<br>ion 3 (mass: 405.887: intensity: 32571.37) assigned 2 times<br>ion 4 (mass: 810.768: intensity: 32571.37) assigned 2 times<br>ion 5 (mass: 963.517: intensity: 24335.35) assigned 0 times<br>ion 6 (mass: 483.311: intensity: 4815.75) assigned 0 times<br>ion 7 (mass: 965.614: intensity: 4815.75) assigned 0 times<br>ion 8 (mass: 348.289: intensity: 2108.75) assigned 1 times<br>ion 9 (mass: 291.771: intensity: 1942.19) assigned 1 times<br>ion 10 (mass: 445.719: intensity: 1844.64) assigned 2 times |

## Ion Table

15 ions assigned of 25 ions above threshold (60%).

### N-terminal ions

| AA | N-ion | b       | b*      | b-98 | bo      |
|----|-------|---------|---------|------|---------|
| R  | 1     | 157.108 | 140.082 | -    | 139.098 |
| R  | 2     | 313.210 | 296.183 | -    | 295.199 |
| A  | 3     | 384.247 | 367.220 | -    | 366.236 |

|   |    |                                                  |                              |                                                |                                             |
|---|----|--------------------------------------------------|------------------------------|------------------------------------------------|---------------------------------------------|
| E | 4  | 513.289<br>513.617 (1)<br>*257.312 [2+] (1)      | 496.263                      | -                                              | 495.279                                     |
| s | 5  | 680.288                                          | 663.261                      | 582.302<br>291.771 [2+] (4)                    | 662.277                                     |
| L | 6  | 793.372<br>793.683 (1)<br>397.345 [2+] (1)       | 776.345                      | 695.386<br>348.289 [2+] (4)                    | 775.361                                     |
| D | 7  | 908.399<br>*908.671 (100)<br>*454.839 [2+] (100) | 891.372<br>*445.719 [2+] (4) | 810.413<br>*405.887 [2+] (75)<br>*810.768 (75) | 890.388<br>*445.719 [2+] (4)<br>890.431 (4) |
| P | 8  | 1005.451                                         | 988.425                      | 907.466                                        | 987.441                                     |
| R | 9  | 1161.553<br>581.461 [2+] (1)<br>1161.914 (1)     | 1144.526                     | 1063.567                                       | 1143.542                                    |
| P | 10 | 1258.605                                         | 1241.579                     | 1160.619                                       | 1240.595                                    |
| L | 11 | -                                                | -                            | -                                              | -                                           |

### C-terminal ions

| AA | C-ion | y                      | y*       | y-98                                             | yo       |
|----|-------|------------------------|----------|--------------------------------------------------|----------|
| R  | 11    | -                      | -        | -                                                | -        |
| R  | 10    | 1233.599               | 1216.572 | 1135.613                                         | 1215.588 |
| A  | 9     | 1077.498               | 1060.471 | 979.512                                          | 1059.487 |
| E  | 8     | 1006.461               | 989.434  | 908.475<br>*908.671 (100)<br>*454.839 [2+] (100) | 988.450  |
| s  | 7     | 877.418                | 860.391  | 779.432                                          | 859.407  |
| L  | 6     | 710.420<br>710.351 (1) | 693.393  | -                                                | 692.409  |
| D  | 5     | 597.336                | 580.309  | -                                                | 579.325  |
| P  | 4     | 482.309                | 465.282  | -                                                | 464.298  |
| R  | 3     | 385.256                | 368.229  | -                                                | 367.245  |
| P  | 2     | 229.155                | 212.128  | -                                                | 211.144  |
| L  | 1     | 132.102                | 115.075  | -                                                | 114.091  |

### Ion distribution

| Threshold | Ion count | Matches | % matched |
|-----------|-----------|---------|-----------|
| 0         | 66        | 29      | 43        |
| 0.5       | 34        | 19      | 55        |
| 1         | 25        | 15      | 60        |
| 2         | 14        | 8       | 57        |
| 3         | 11        | 8       | 72        |
| 4         | 11        | 8       | 72        |
| 5         | 7         | 4       | 57        |
| 10        | 7         | 4       | 57        |

### Observed ions > 1%

| m/z     | Intensity           | % max | Assignment (delta) |
|---------|---------------------|-------|--------------------|
| 254.228 | 725.97 <sub>3</sub> | 1.69  |                    |

|          |           |       |                                  |
|----------|-----------|-------|----------------------------------|
| 257.312  | 778.62,   | 1.81  | b4[2+] (0.16) : x2 (0.16)        |
| 291.771  | 1942.19,  | 4.52  | b5-98[2+] (0.11)                 |
| 348.289  | 2108.75,  | 4.91  | b6-98[2+] (0.09)                 |
| 397.345  | 819.41,   | 1.91  | b6[2+] (0.15)                    |
| 405.887  | 32571.37, | 75.92 | c6[2+] (0.18) : b7-98[2+] (0.17) |
| 425.283  | 471.65,   | 1.09  |                                  |
| 445.719  | 1844.64,  | 4.30  | b7o[2+] (0.02) : b7*[2+] (-0.47) |
| 446.852  | 1142.31,  | 2.66  |                                  |
| 454.839  | 42897.06, | 100   | b7[2+] (0.13) : y8-98[2+] (0.09) |
| 457.918  | 980.30,   | 2.28  |                                  |
| 483.311  | 4815.75,  | 11.22 |                                  |
| 513.617  | 778.62,   | 1.81  | b4 (0.32)                        |
| 581.461  | 490.04,   | 1.14  | b9[2+] (0.18)                    |
| 710.351  | 475.16,   | 1.10  | y6 (-0.06)                       |
| 793.683  | 819.41,   | 1.91  | b6 (0.31)                        |
| 810.768  | 32571.37, | 75.92 | c6 (0.36) : b7-98 (0.35)         |
| 849.558  | 471.65,   | 1.09  |                                  |
| 890.431  | 1844.64,  | 4.30  | b7o (0.04)                       |
| 892.696  | 1142.31,  | 2.66  |                                  |
| 902.204  | 480.03,   | 1.11  |                                  |
| 908.671  | 42897.06, | 100   | b7 (0.27) : y8-98 (0.19)         |
| 963.517  | 24335.35, | 56.72 |                                  |
| 965.614  | 4815.75,  | 11.22 |                                  |
| 1161.914 | 490.04,   | 1.14  | b9 (0.36)                        |

S1246

# ProPhosSI MS/MS report

Mass: 1040.361043 Charge: 2+

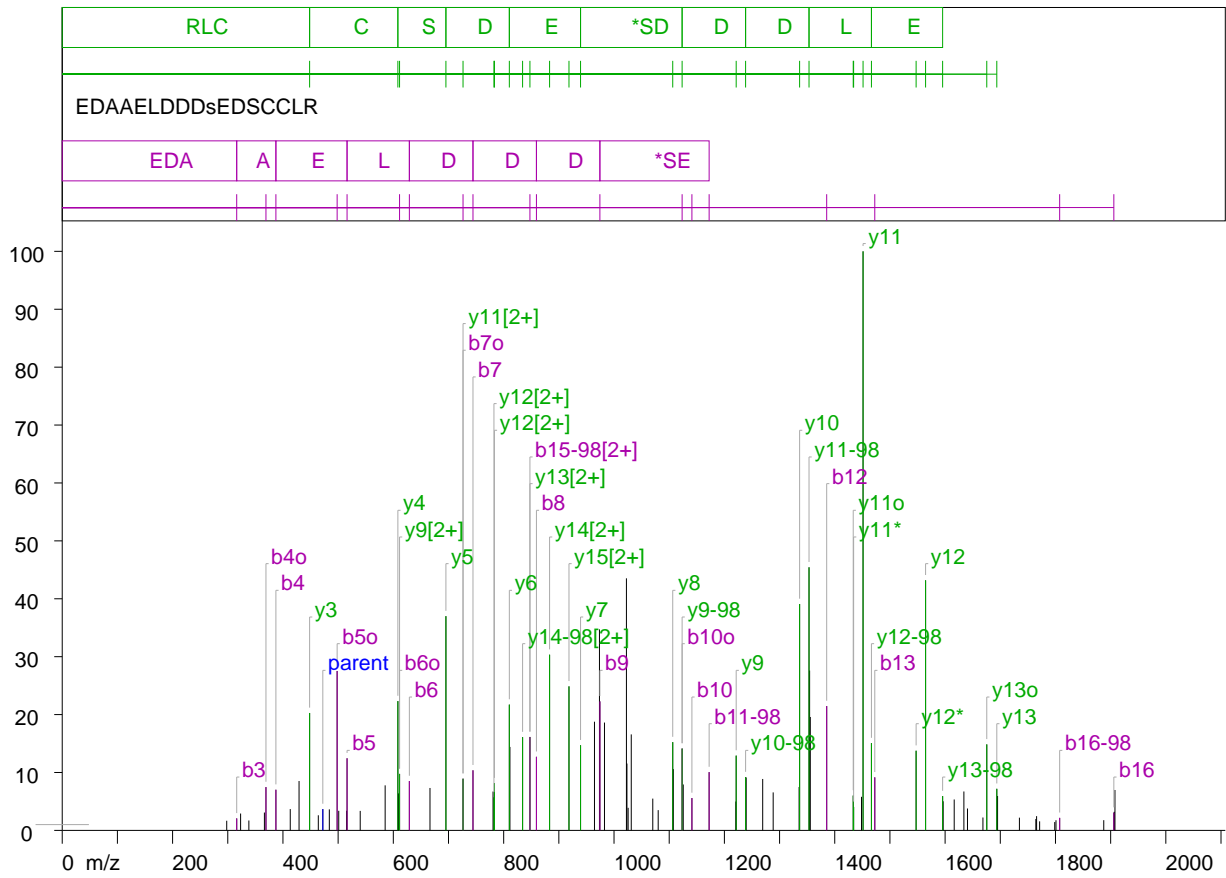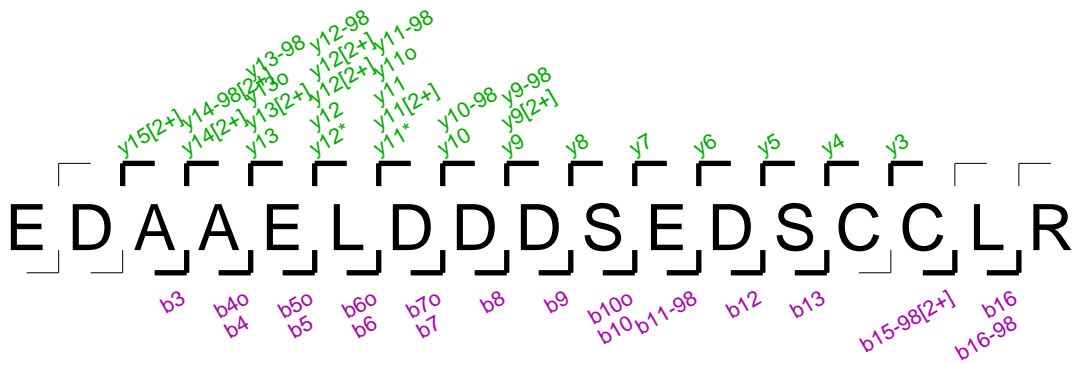

## Cav3.2 human

(80) 1237\*EDAAELDDDsEDSCCLR 1253 2078.708 (-0.0018) Da

### Modifications and supporting evidence

| Position | Residue ID | Modification | Evidence              |
|----------|------------|--------------|-----------------------|
| 10       | (1246)     | Phospho (ST) | b9=>b11-98; y7=>y9-98 |

### Spectrum interpretation

| Rule                                   | passed/tests | Description                                                                                                                                                                                                                                                                                                                                                                                                                                                                                                                                                                                                                                   |
|----------------------------------------|--------------|-----------------------------------------------------------------------------------------------------------------------------------------------------------------------------------------------------------------------------------------------------------------------------------------------------------------------------------------------------------------------------------------------------------------------------------------------------------------------------------------------------------------------------------------------------------------------------------------------------------------------------------------------|
| Parent ions present                    | 1/1          | Parent ions for the dephospho fragment p-98 are observed in the spectrum                                                                                                                                                                                                                                                                                                                                                                                                                                                                                                                                                                      |
| Three -98 Ions present                 | 1/1          | 9 des-phospho fragment ions were found.                                                                                                                                                                                                                                                                                                                                                                                                                                                                                                                                                                                                       |
| Unique -98 transitions present         | 1/1          | transition b9 to b11-98, transition y7 to y9-98 support unique phosphorylation at position 10<br><br/>                                                                                                                                                                                                                                                                                                                                                                                                                                                                                                                                        |
| Four Sequential b or y ions            | 1/1          | Sequence of four b ions found from b3 to b6.<br>Sequence of four y ions found from y3 to y6.                                                                                                                                                                                                                                                                                                                                                                                                                                                                                                                                                  |
| Five of six sequential ions present    | 1/1          | Five of Six ions found between b2 and b7<br>Five of Six ions found between b3 and b8<br>Five of Six ions found between b4 and b9<br>Five of Six ions found between b5 and b10<br>Five of Six ions found between b6 and b11<br>Five of Six ions found between y2 and y7<br>Five of Six ions found between y3 and y8<br>Five of Six ions found between y4 and y9<br>Five of Six ions found between y5 and y10<br>Five of Six ions found between y6 and y11<br>Five of Six ions found between y7 and y12<br>Five of Six ions found between y8 and y13<br>Five of Six ions found between y9 and y14<br>Five of Six ions found between y10 and y15 |
| Proline directed fragmentation pattern | 0/0          |                                                                                                                                                                                                                                                                                                                                                                                                                                                                                                                                                                                                                                               |
| PhosphoTyrosine transition present     | 0/0          | 0 of 0 phosphotyrosine transitions were found.                                                                                                                                                                                                                                                                                                                                                                                                                                                                                                                                                                                                |
| Six of top ten ions identified         | 7/6          | ion 1 (mass: 1451.333: intensity: 683.02) assigned 1 times<br>ion 2 (mass: 1353.391: intensity: 310.33) assigned 1 times<br>ion 3 (mass: 1022.492: intensity: 297.35) assigned 0 times<br>ion 4 (mass: 1564.590: intensity: 294.94) assigned 1 times<br>ion 5 (mass: 1336.339: intensity:                                                                                                                                                                                                                                                                                                                                                     |

|   |   |                                                                                                                                                                                                                                                                                                                                             |
|---|---|---------------------------------------------------------------------------------------------------------------------------------------------------------------------------------------------------------------------------------------------------------------------------------------------------------------------------------------------|
| - | - | 266.99) assigned 1 times<br>ion 6 (mass: 695.315: intensity: 252.69) assigned 1 times<br>ion 7 (mass: 973.607: intensity: 237.12) assigned 0 times<br>ion 8 (mass: 883.207: intensity: 207.21) assigned 2 times<br>ion 9 (mass: 1354.452: intensity: 188.51) assigned 0 times<br>ion 10 (mass: 498.210: intensity: 188.04) assigned 1 times |
|---|---|---------------------------------------------------------------------------------------------------------------------------------------------------------------------------------------------------------------------------------------------------------------------------------------------------------------------------------------------|

## Ion Table

46 ions assigned of 87 ions above threshold (52%).

### N-terminal ions

| AA | N-ion | b                         | b*       | b-98                           | bo                         |
|----|-------|---------------------------|----------|--------------------------------|----------------------------|
| E  | 1     | 130.050                   | 113.023  | -                              | 112.039                    |
| D  | 2     | 245.077                   | 228.050  | -                              | 227.066                    |
| A  | 3     | 316.114<br>*316.194 (2)   | 299.087  | -                              | 298.103                    |
| A  | 4     | 387.151<br>387.221 (7)    | 370.125  | -                              | 369.141<br>369.215 (7)     |
| E  | 5     | 516.194<br>516.167 (12)   | 499.167  | -                              | 498.183<br>498.210 (27)    |
| L  | 6     | 629.278<br>629.081 (8)    | 612.251  | -                              | 611.267<br>*611.304 (9)    |
| D  | 7     | 744.305<br>744.367 (10)   | 727.278  | -                              | 726.294<br>*726.369 (8)    |
| D  | 8     | 859.332<br>859.395 (12)   | 842.305  | -                              | 841.321                    |
| D  | 9     | 974.359<br>974.349 (22)   | 957.332  | -                              | 956.348                    |
| s  | 10    | 1141.357<br>1141.120 (5)  | 1124.330 | 1043.371                       | 1123.346<br>*1123.395 (14) |
| E  | 11    | 1270.400                  | 1253.373 | 1172.414<br>1172.369 (10)      | 1252.389                   |
| D  | 12    | 1385.427<br>1385.389 (21) | 1368.400 | 1287.441                       | 1367.416                   |
| S  | 13    | 1472.459<br>1472.547 (9)  | 1455.432 | 1374.473                       | 1454.448                   |
| C  | 14    | 1632.489                  | 1615.463 | 1534.503                       | 1614.479                   |
| C  | 15    | 1792.520                  | 1775.493 | 1694.534<br>*847.567 [2+] (16) | 1774.509                   |
| L  | 16    | 1905.604<br>1905.765 (3)  | 1888.577 | 1807.618<br>1807.593 (2)       | 1887.593                   |
| R  | 17    | -                         | -        | -                              | -                          |

### C-terminal ions

| AA | C-ion | y                                              | y*       | y-98                          | yo                        |
|----|-------|------------------------------------------------|----------|-------------------------------|---------------------------|
| E  | 17    | -                                              | -        | -                             | -                         |
| D  | 16    | 1950.673                                       | 1933.646 | 1852.687                      | 1932.662                  |
| A  | 15    | 1835.646<br>918.372 [2+] (24)                  | 1818.619 | 1737.660                      | 1817.635                  |
| A  | 14    | 1764.609<br>*883.207 [2+] (30)                 | 1747.582 | 1666.623<br>834.283 [2+] (16) | 1746.598                  |
| E  | 13    | 1693.572<br>1693.677 (7)<br>*847.567 [2+] (16) | 1676.545 | 1595.586<br>1595.519 (5)      | 1675.561<br>1675.513 (14) |

|   |    |                                                                   |                            |                            |                          |
|---|----|-------------------------------------------------------------------|----------------------------|----------------------------|--------------------------|
| L | 12 | 1564.529<br>1564.590 (43)<br>783.231 [2+] (8)<br>782.369 [2+] (5) | 1547.503<br>*1547.472 (13) | 1466.543<br>1466.481 (15)  | 1546.519                 |
| D | 11 | 1451.445<br>*726.369 [2+] (8)<br>1451.333 (100)                   | 1434.419<br>*1434.222 (4)  | 1353.459<br>1353.391 (45)  | 1433.435<br>1433.458 (6) |
| D | 10 | 1336.418<br>1336.339 (39)                                         | 1319.392                   | 1238.432<br>1238.460 (9)   | 1318.408                 |
| D | 9  | 1221.391<br>1221.369 (12)<br>*611.304 [2+] (9)                    | 1204.365                   | 1123.405<br>*1123.395 (14) | 1203.381                 |
| s | 8  | 1106.364<br>1106.374 (15)                                         | 1089.338                   | 1008.378                   | 1088.354                 |
| E | 7  | 939.366<br>*939.336 (14)                                          | 922.339                    | -                          | 921.355                  |
| D | 6  | 810.323<br>810.284 (21)                                           | 793.297                    | -                          | 792.313                  |
| S | 5  | 695.296<br>695.315 (36)                                           | 678.270                    | -                          | 677.286                  |
| C | 4  | 608.264<br>608.273 (22)                                           | 591.238                    | -                          | 590.254                  |
| C | 3  | 448.234<br>448.323 (20)                                           | 431.207                    | -                          | 430.223                  |
| L | 2  | 288.203                                                           | 271.177                    | -                          | 270.193                  |
| R | 1  | 175.119                                                           | 158.092                    | -                          | 157.108                  |

### Ion distribution

| Threshold | Ion count | Matches | % matched |
|-----------|-----------|---------|-----------|
| 0         | 96        | 48      | 50        |
| 0.5       | 94        | 48      | 51        |
| 1         | 94        | 48      | 51        |
| 2         | 87        | 45      | 51        |
| 3         | 80        | 42      | 52        |
| 4         | 68        | 40      | 58        |
| 5         | 66        | 39      | 59        |
| 10        | 36        | 26      | 72        |

### Observed ions > 1%

| m/z     | Intensity           | % max | Assignment (delta)     |
|---------|---------------------|-------|------------------------|
| 298.099 | 11.40 <sub>1</sub>  | 1.66  | b3o (-0.00)            |
| 316.194 | 14.13 <sub>1</sub>  | 2.06  | b3 (0.07) : x2 (-0.00) |
| 323.262 | 19.89 <sub>1</sub>  | 2.91  | c6[2+] (-0.39)         |
| 338.232 | 11.69 <sub>1</sub>  | 1.71  |                        |
| 366.384 | 21.07 <sub>1</sub>  | 3.08  |                        |
| 369.215 | 51.08 <sub>1</sub>  | 7.47  | b4o (0.07)             |
| 387.221 | 47.97 <sub>1</sub>  | 7.02  | b4 (0.06)              |
| 413.231 | 25.15 <sub>1</sub>  | 3.68  |                        |
| 429.191 | 58.24 <sub>1</sub>  | 8.52  |                        |
| 448.323 | 138.49 <sub>1</sub> | 20.27 | y3 (0.08)              |



|          |         |       |                                     |
|----------|---------|-------|-------------------------------------|
| 464.094  | 17.83,  | 2.61  |                                     |
| 472.259  | 25.16,  | 3.68  |                                     |
| 484.043  | 24.82,  | 3.63  | x7[2+] (-0.14)                      |
| 498.210  | 188.04, | 27.53 | b5o (0.02)                          |
| 501.108  | 23.12,  | 3.38  |                                     |
| 515.373  | 23.16,  | 3.39  |                                     |
| 516.167  | 85.07,  | 12.45 | b5 (-0.02)                          |
| 539.995  | 23.01,  | 3.36  |                                     |
| 585.216  | 53.14,  | 7.78  |                                     |
| 608.273  | 152.50, | 22.32 | y4 (0.00)                           |
| 609.305  | 43.66,  | 6.39  |                                     |
| 611.304  | 66.61,  | 9.75  | y9[2+] (0.10) : b6o (0.03)          |
| 629.081  | 58.16,  | 8.51  | b6 (-0.19)                          |
| 666.491  | 50.04,  | 7.32  |                                     |
| 695.315  | 252.69, | 36.99 | y5 (0.01)                           |
| 726.369  | 60.97,  | 8.92  | y11[2+] (0.14) : b7o (0.07)         |
| 744.367  | 70.88,  | 10.37 | b7 (0.06)                           |
| 780.730  | 45.84,  | 6.71  |                                     |
| 782.369  | 38.83,  | 5.68  | y12[2+] (-0.39)                     |
| 783.231  | 55.62,  | 8.14  | y12[2+] (0.46)                      |
| 810.284  | 148.35, | 21.71 | y6 (-0.03)                          |
| 811.354  | 98.45,  | 14.41 |                                     |
| 834.283  | 109.96, | 16.09 | y14-98[2+] (0.46)                   |
| 847.567  | 110.20, | 16.13 | y13[2+] (0.27) : b15-98[2+] (-0.20) |
| 859.395  | 86.78,  | 12.70 | b8 (0.06)                           |
| 883.207  | 207.21, | 30.33 | a15[2+] (0.44) : y14[2+] (0.39)     |
| 918.372  | 169.88, | 24.87 | y15[2+] (0.04)                      |
| 939.336  | 100.38, | 14.69 | a16[2+] (0.02) : y7 (-0.03)         |
| 964.566  | 128.20, | 18.76 |                                     |
| 973.607  | 237.12, | 34.71 |                                     |
| 974.349  | 152.19, | 22.28 | b9 (-0.01)                          |
| 982.697  | 127.20, | 18.62 |                                     |
| 1022.492 | 297.35, | 43.53 |                                     |
| 1023.399 | 78.86,  | 11.54 |                                     |
| 1025.553 | 26.64,  | 3.90  |                                     |
| 1031.219 | 113.23, | 16.57 |                                     |
| 1070.206 | 37.50,  | 5.49  |                                     |
| 1080.051 | 23.90,  | 3.49  |                                     |
| 1106.374 | 104.08, | 15.23 | y8 (0.00)                           |
| 1107.383 | 72.31,  | 10.58 |                                     |
| 1123.395 | 96.54,  | 14.13 | b10o (0.04) : y9-98 (-0.01)         |
| 1125.406 | 54.16,  | 7.92  |                                     |

|          |                     |       |                            |
|----------|---------------------|-------|----------------------------|
| 1141.120 | 38.15 <sub>,</sub>  | 5.58  | b10 (-0.23)                |
| 1172.369 | 68.73 <sub>,</sub>  | 10.06 | b11-98 (-0.04)             |
| 1220.729 | 34.07 <sub>,</sub>  | 4.98  |                            |
| 1221.369 | 88.20 <sub>,</sub>  | 12.91 | y9 (-0.02)                 |
| 1238.460 | 62.79 <sub>,</sub>  | 9.19  | y10-98 (0.02)              |
| 1239.456 | 62.39 <sub>,</sub>  | 9.13  |                            |
| 1269.430 | 60.67 <sub>,</sub>  | 8.88  |                            |
| 1288.421 | 44.82 <sub>,</sub>  | 6.56  |                            |
| 1335.414 | 51.14 <sub>,</sub>  | 7.48  |                            |
| 1336.339 | 266.99 <sub>,</sub> | 39.08 | y10 (-0.07)                |
| 1353.391 | 310.33 <sub>,</sub> | 45.43 | y11-98 (-0.06)             |
| 1354.452 | 188.51 <sub>,</sub> | 27.59 |                            |
| 1355.672 | 133.77 <sub>,</sub> | 19.58 |                            |
| 1385.389 | 146.67 <sub>,</sub> | 21.47 | b12 (-0.03)                |
| 1433.458 | 41.10 <sub>,</sub>  | 6.01  | y11o (0.02)                |
| 1434.222 | 27.66 <sub>,</sub>  | 4.04  | y11* (-0.19) : z11 (-0.19) |
| 1448.528 | 39.62 <sub>,</sub>  | 5.80  |                            |
| 1451.333 | 683.02 <sub>,</sub> | 100   | y11 (-0.11)                |
| 1466.481 | 102.89 <sub>,</sub> | 15.06 | y12-98 (-0.06)             |
| 1472.547 | 62.55 <sub>,</sub>  | 9.15  | b13 (0.08)                 |
| 1547.472 | 93.97 <sub>,</sub>  | 13.75 | y12* (-0.03) : z12 (-0.03) |
| 1564.590 | 294.94 <sub>,</sub> | 43.18 | y12 (0.06)                 |
| 1595.519 | 40.46 <sub>,</sub>  | 5.92  | y13-98 (-0.06)             |
| 1596.428 | 34.37 <sub>,</sub>  | 5.03  |                            |
| 1616.463 | 36.48 <sub>,</sub>  | 5.34  |                            |
| 1634.026 | 45.91 <sub>,</sub>  | 6.72  |                            |
| 1640.540 | 25.83 <sub>,</sub>  | 3.78  |                            |
| 1668.559 | 15.22 <sub>,</sub>  | 2.22  |                            |
| 1675.513 | 101.42 <sub>,</sub> | 14.84 | y13o (-0.04)               |
| 1693.677 | 49.07 <sub>,</sub>  | 7.18  | y13 (0.10)                 |
| 1695.097 | 40.59 <sub>,</sub>  | 5.94  |                            |
| 1734.675 | 15.02 <sub>,</sub>  | 2.19  |                            |
| 1764.426 | 13.46 <sub>,</sub>  | 1.97  | a15 (-0.09) : y14 (-0.18)  |
| 1765.785 | 16.81 <sub>,</sub>  | 2.46  |                            |
| 1771.303 | 10.67 <sub>,</sub>  | 1.56  |                            |
| 1798.672 | 9.83 <sub>,</sub>   | 1.43  |                            |
| 1800.926 | 11.97 <sub>,</sub>  | 1.75  |                            |
| 1807.593 | 14.77 <sub>,</sub>  | 2.16  | b16-98 (-0.02)             |
| 1887.479 | 12.06 <sub>,</sub>  | 1.76  | b16o (-0.11)               |
| 1905.765 | 20.92 <sub>,</sub>  | 3.06  | b16 (0.16)                 |
| 1906.572 | 21.99 <sub>,</sub>  | 3.21  |                            |
| 1907.788 | 47.66               | 6.97  |                            |

**S1587**

# ProPhosSI MS/MS report

Mass: 756.359385 Charge: 2+

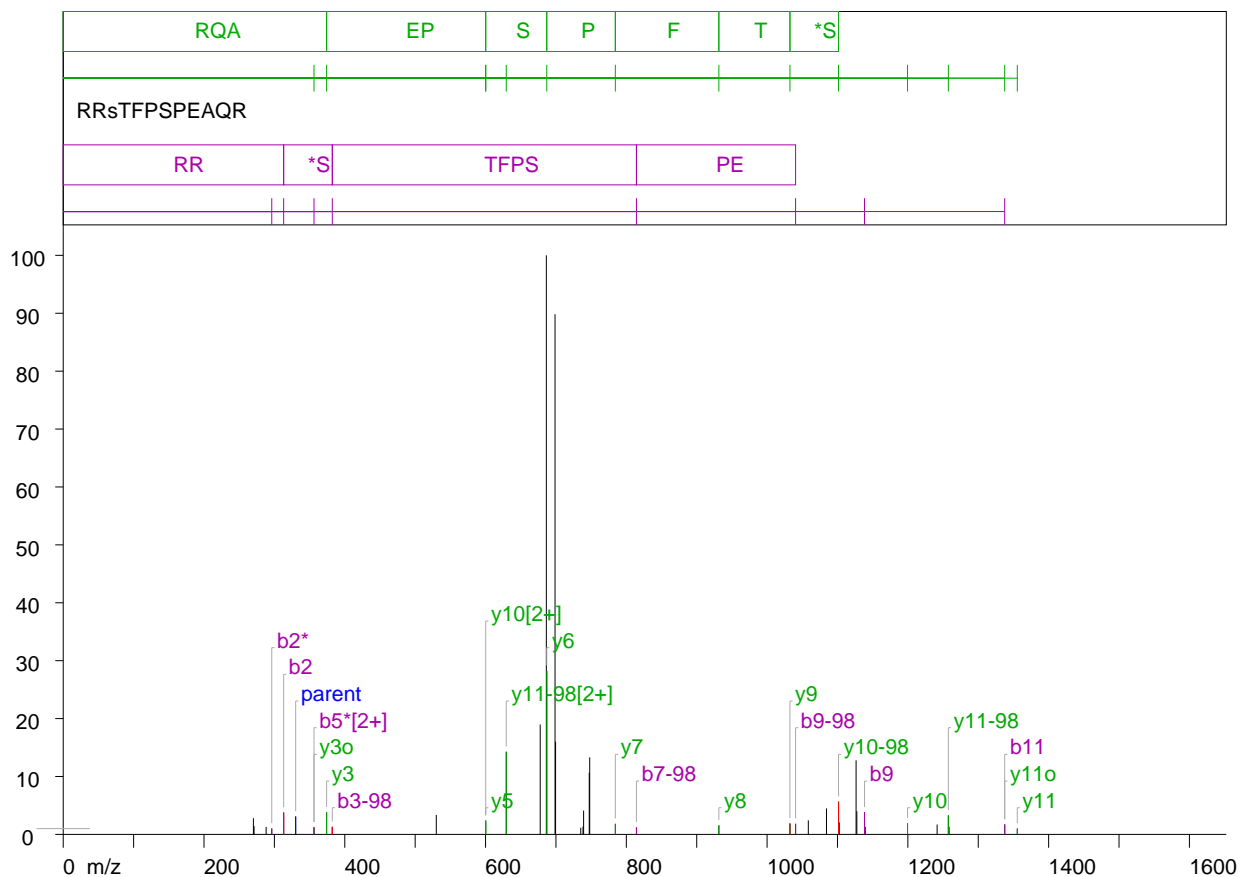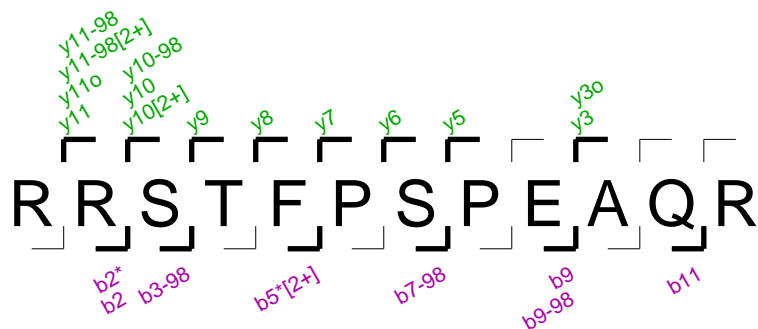

## Cav3.2 human

(47) 1585 RRsTFPSPEAQR 1596 ~1510.704 (-0.0010) Da

|            |             |
|------------|-------------|
| Parent Ion | m/z         |
| p-98[2+]   | 330.228 (3) |

### Modifications and supporting evidence

| Position | Residue ID | Modification | Evidence                   |
|----------|------------|--------------|----------------------------|
| 3        | (1587)     | Phospho (ST) | b2 => b3-98 : y9 => y10-98 |

### Spectrum interpretation

| Rule                                   | passed/tests | Description                                                                                                                                                                                                                                                                                                                                                                                                                                                                                                                                                                                                                                 |
|----------------------------------------|--------------|---------------------------------------------------------------------------------------------------------------------------------------------------------------------------------------------------------------------------------------------------------------------------------------------------------------------------------------------------------------------------------------------------------------------------------------------------------------------------------------------------------------------------------------------------------------------------------------------------------------------------------------------|
| Parent ions present                    | 1/1          | Parent ions for the dephospho fragment p-98 are observed in the spectrum                                                                                                                                                                                                                                                                                                                                                                                                                                                                                                                                                                    |
| Three -98 Ions present                 | 1/1          | 5 des-phospho fragment ions were found.                                                                                                                                                                                                                                                                                                                                                                                                                                                                                                                                                                                                     |
| Unique -98 transitions present         | 1/1          | transition b2 to b3-98, transition y9 to y10-98 support unique phosphorylation at position 3<br><br/>                                                                                                                                                                                                                                                                                                                                                                                                                                                                                                                                       |
| Four Sequential b or y ions            | 1/1          | Sequence of four y ions found from y5 to y8.                                                                                                                                                                                                                                                                                                                                                                                                                                                                                                                                                                                                |
| Five of six sequential ions present    | 1/1          | Five of Six ions found between y3 and y8<br>Five of Six ions found between y4 and y9<br>Five of Six ions found between y5 and y10<br>Five of Six ions found between y6 and y11<br>Five of Six ions found between y7 and y12                                                                                                                                                                                                                                                                                                                                                                                                                 |
| Proline directed fragmentation pattern | 2/3          | FAIL: y7< y6<br/>No proline ions at b6-98<br/><br>NOTE: S-P is a low abundance fragmentation.<br>PASS: y5> y4<br/><br>PASS: b8-98< b7-98<br/>                                                                                                                                                                                                                                                                                                                                                                                                                                                                                               |
| PhosphoTyrosine transition present     | 0/0          | 0 of 0 phosphotyrosine transitions were found.                                                                                                                                                                                                                                                                                                                                                                                                                                                                                                                                                                                              |
| Six of top ten ions identified         | 4/6          | ion 1 (mass: 686.358: intensity: 10025.54) assigned 0 times<br>ion 2 (mass: 698.735: intensity: 9006.65) assigned 0 times<br>ion 3 (mass: 686.973: intensity: 2832.12) assigned 1 times<br>ion 4 (mass: 677.639: intensity: 1902.92) assigned 1 times<br>ion 5 (mass: 699.481: intensity: 1605.08) assigned 0 times<br>ion 6 (mass: 629.423: intensity: 1431.57) assigned 1 times<br>ion 7 (mass: 747.995: intensity: 1333.67) assigned 0 times<br>ion 8 (mass: 1126.437: intensity: 1281.87) assigned 0 times<br>ion 9 (mass: 747.300: intensity: 1066.71) assigned 0 times<br>ion 10 (mass: 1101.482: intensity: 566.37) assigned 1 times |

## Ion Table

22 ions assigned of 41 ions above threshold (53%).

### N-terminal ions

| AA | N-ion | b                         | b*                           | b-98                     | bo       |
|----|-------|---------------------------|------------------------------|--------------------------|----------|
| R  | 1     | 157.108                   | 140.082                      | -                        | 139.098  |
| R  | 2     | 313.210<br>313.142 (3)    | 296.183<br>296.253 (1)       | -                        | 295.199  |
| s  | 3     | 480.208                   | 463.181                      | 382.222<br>382.284 (1)   | 462.197  |
| T  | 4     | 581.256                   | 564.229                      | 483.270                  | 563.245  |
| F  | 5     | 728.324                   | 711.297<br>*356.272 [2+] (1) | 630.338                  | 710.313  |
| P  | 6     | 825.377                   | 808.350                      | 727.391                  | 807.366  |
| S  | 7     | 912.409                   | 895.382                      | 814.423<br>814.389 (1)   | 894.398  |
| P  | 8     | 1009.462                  | 992.435                      | 911.476                  | 991.451  |
| E  | 9     | 1138.504<br>1138.419 (3)  | 1121.478                     | 1040.518<br>1040.501 (1) | 1120.494 |
| A  | 10    | 1209.541                  | 1192.515                     | 1111.555                 | 1191.531 |
| Q  | 11    | 1337.600<br>*1337.536 (1) | 1320.573                     | 1239.614                 | 1319.589 |
| R  | 12    | -                         | -                            | -                        | -        |

### C-terminal ions

| AA | C-ion | y                                             | y*       | y-98                                          | yo                        |
|----|-------|-----------------------------------------------|----------|-----------------------------------------------|---------------------------|
| R  | 12    | -                                             | -        | -                                             | -                         |
| R  | 11    | 1355.610<br>1355.459 (1)                      | 1338.584 | 1257.625<br>629.423 [2+] (14)<br>1257.517 (3) | 1337.600<br>*1337.536 (1) |
| s  | 10    | 1199.509<br>*600.241 [2+] (2)<br>1199.529 (1) | 1182.483 | 1101.523<br>1101.482 (5)                      | 1181.499                  |
| T  | 9     | 1032.511<br>1032.467 (1)                      | 1015.484 | -                                             | 1014.500                  |
| F  | 8     | 931.463<br>931.458 (1)                        | 914.437  | -                                             | 913.453                   |
| P  | 7     | 784.395<br>784.421 (1)                        | 767.368  | -                                             | 766.384                   |
| S  | 6     | 687.342<br>686.973 (28)                       | 670.316  | -                                             | 669.332                   |
| P  | 5     | 600.310<br>*600.241 (2)                       | 583.284  | -                                             | 582.300                   |
| E  | 4     | 503.257                                       | 486.231  | -                                             | 485.247                   |
| A  | 3     | 374.215<br>374.200 (3)                        | 357.188  | -                                             | 356.204<br>*356.272 (1)   |
| Q  | 2     | 303.178                                       | 286.151  | -                                             | 285.167                   |
| R  | 1     | 175.119                                       | 158.092  | -                                             | 157.108                   |

### Ion distribution

| Threshold | Ion count | Matches | % matched |
|-----------|-----------|---------|-----------|
| 0         | 74        | 30      | 40        |
| 0.5       | 55        | 27      | 49        |
| 1         | 41        | 21      | 51        |

|    |    |    |    |
|----|----|----|----|
| 2  | 23 | 10 | 43 |
| 3  | 19 | 9  | 47 |
| 4  | 12 | 4  | 33 |
| 5  | 10 | 4  | 40 |
| 10 | 9  | 3  | 33 |

### Observed ions > 1%

| m/z      | Intensity             | % max | Assignment (delta)           |
|----------|-----------------------|-------|------------------------------|
| 270.191  | 280.18 <sub>3</sub>   | 2.79  |                              |
| 271.148  | 142.53 <sub>3</sub>   | 1.42  |                              |
| 288.248  | 129.04 <sub>3</sub>   | 1.28  |                              |
| 296.253  | 101.77 <sub>3</sub>   | 1.01  | b2* (0.06)                   |
| 313.142  | 378.01 <sub>3</sub>   | 3.77  | b2 (-0.06)                   |
| 330.228  | 310.14 <sub>3</sub>   | 3.09  | c2 (-0.00)                   |
| 356.272  | 123.01 <sub>3</sub>   | 1.22  | b5*[2+] (0.11) : y3o (0.06)  |
| 374.200  | 382.46 <sub>3</sub>   | 3.81  | y3 (-0.01)                   |
| 382.284  | 129.87 <sub>3</sub>   | 1.29  | b3-98 (0.06)                 |
| 530.037  | 337.70 <sub>3</sub>   | 3.36  |                              |
| 600.241  | 238.68 <sub>3</sub>   | 2.38  | y10[2+] (-0.01) : y5 (-0.06) |
| 629.423  | 1431.57 <sub>3</sub>  | 14.27 | y11-98[2+] (0.10)            |
| 677.639  | 1902.92 <sub>3</sub>  | 18.98 | c11[2+] (-0.17)              |
| 686.358  | 10025.54 <sub>3</sub> | 100   |                              |
| 686.973  | 2832.12 <sub>3</sub>  | 28.24 | y6 (-0.36)                   |
| 698.735  | 9006.65 <sub>3</sub>  | 89.83 |                              |
| 699.481  | 1605.08 <sub>3</sub>  | 16.00 |                              |
| 735.273  | 115.81 <sub>3</sub>   | 1.15  |                              |
| 738.468  | 134.95 <sub>3</sub>   | 1.34  |                              |
| 739.307  | 412.63 <sub>3</sub>   | 4.11  |                              |
| 747.300  | 1066.71 <sub>3</sub>  | 10.63 |                              |
| 747.995  | 1333.67 <sub>3</sub>  | 13.30 |                              |
| 784.421  | 183.05 <sub>3</sub>   | 1.82  | y7 (0.02)                    |
| 814.389  | 120.98 <sub>3</sub>   | 1.20  | b7-98 (-0.03)                |
| 931.458  | 156.30 <sub>3</sub>   | 1.55  | y8 (-0.00)                   |
| 1032.467 | 189.64 <sub>3</sub>   | 1.89  | y9 (-0.04)                   |
| 1040.501 | 183.68 <sub>3</sub>   | 1.83  | b9-98 (-0.01)                |
| 1058.560 | 242.75 <sub>3</sub>   | 2.42  |                              |
| 1084.362 | 450.35 <sub>3</sub>   | 4.49  |                              |
| 1101.482 | 566.37 <sub>3</sub>   | 5.64  | y10-98 (-0.04)               |
| 1102.506 | 207.72 <sub>3</sub>   | 2.07  |                              |
| 1126.437 | 1281.87 <sub>3</sub>  | 12.78 |                              |
| 1127.495 | 400.62 <sub>3</sub>   | 3.99  |                              |
| 1138.419 | 383.47 <sub>3</sub>   | 3.82  | b9 (-0.08)                   |

|          |                     |      |                            |
|----------|---------------------|------|----------------------------|
| 1139.422 | 129.82 <sub>2</sub> | 1.29 |                            |
| 1199.529 | 192.11 <sub>2</sub> | 1.91 | y10 (0.01)                 |
| 1241.547 | 170.90 <sub>2</sub> | 1.70 |                            |
| 1257.517 | 329.83 <sub>2</sub> | 3.28 | y11-98 (-0.10)             |
| 1258.586 | 132.54 <sub>2</sub> | 1.32 |                            |
| 1337.536 | 171.43 <sub>2</sub> | 1.70 | b11 (-0.06) : y11o (-0.06) |
| 1355.459 | 101.58 <sub>2</sub> | 1.01 | y11 (-0.15)                |



**T1588**

# ProPhosSI MS/MS report

Mass: 678.308061 Charge: 2+

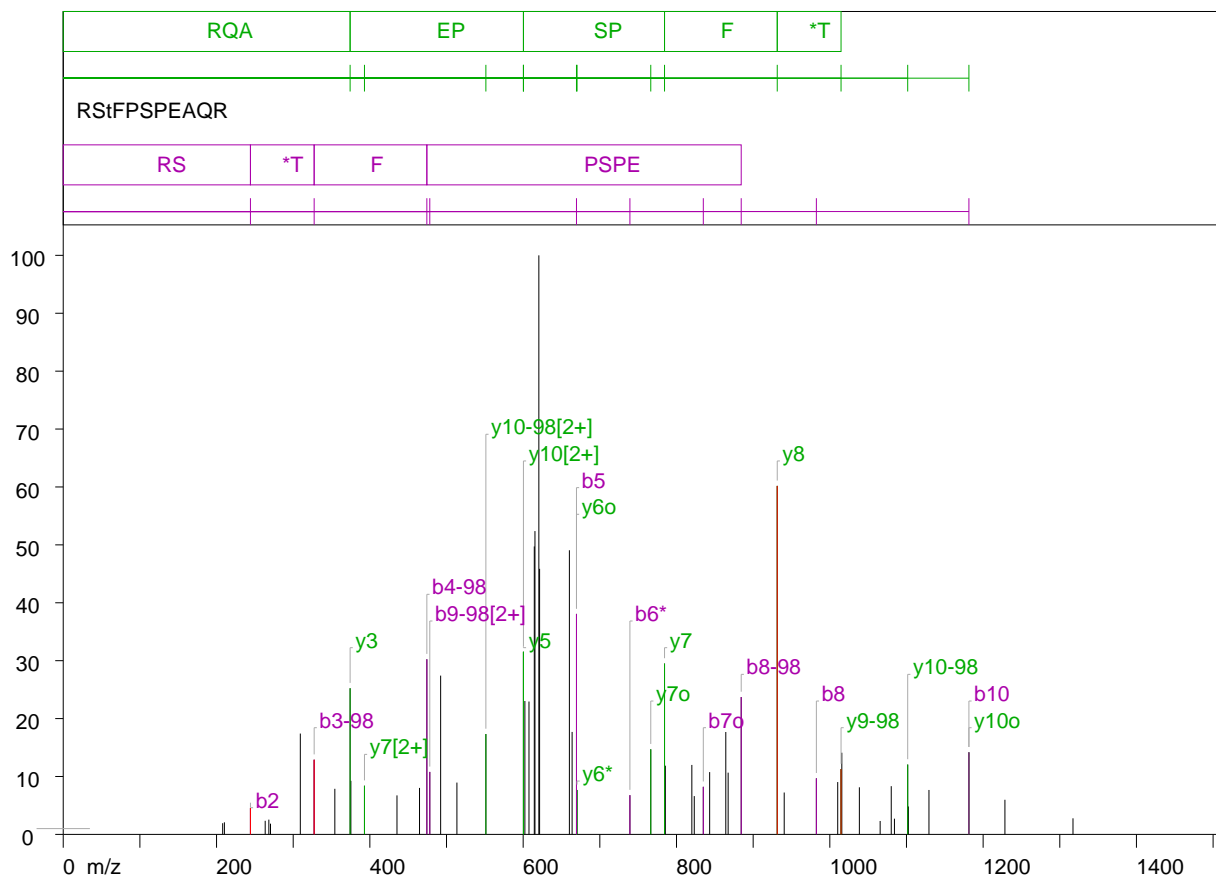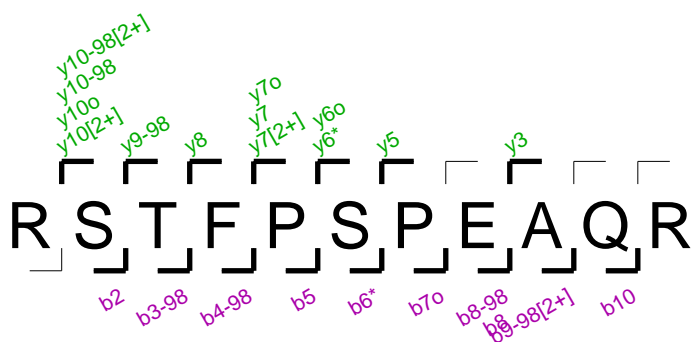

## Cav3.2 human

(26) 1586 RSIFPSPEAQR 1596 1354.603 (-0.0026) Da

|                         |     |
|-------------------------|-----|
| Parent Ion              | m/z |
| No parent ions observed |     |

## Modifications and supporting evidence

| Position | Residue ID | Modification | Evidence                  |
|----------|------------|--------------|---------------------------|
| 3        | (1588)     | Phospho (ST) | b2 => b3-98 : y8 => y9-98 |

## Spectrum interpretation

| Rule                                   | passed/tests | Description                                                                                                                                                                                                                                                                                                                                                                                                                                                                                                                                                                                                             |
|----------------------------------------|--------------|-------------------------------------------------------------------------------------------------------------------------------------------------------------------------------------------------------------------------------------------------------------------------------------------------------------------------------------------------------------------------------------------------------------------------------------------------------------------------------------------------------------------------------------------------------------------------------------------------------------------------|
| Parent ions present                    | 0/1          | Parent ions corresponding to the parent fragment - 1 phosphate ions were not found                                                                                                                                                                                                                                                                                                                                                                                                                                                                                                                                      |
| Three -98 Ions present                 | 1/1          | 6 des-phospho fragment ions were found.                                                                                                                                                                                                                                                                                                                                                                                                                                                                                                                                                                                 |
| Unique -98 transitions present         | 1/1          | transition b2 to b3-98, transition y8 to y9-98 support unique phosphorylation at position 3<br><br/>                                                                                                                                                                                                                                                                                                                                                                                                                                                                                                                    |
| Four Sequential b or y ions            | 1/1          | Sequence of four y ions found from y7 to y10-98.                                                                                                                                                                                                                                                                                                                                                                                                                                                                                                                                                                        |
| Five of six sequential ions present    | 1/1          | Five of Six ions found between y5 and y10                                                                                                                                                                                                                                                                                                                                                                                                                                                                                                                                                                               |
| Proline directed fragmentation pattern | 3/3          | PASS: y7> y6<br/><br>PASS: b5-98< b4-98<br/><br>NOTE: S-P is a low abundance fragmentation.<br>PASS: y5> y4<br/><br>No proline ions at b7-98<br/>                                                                                                                                                                                                                                                                                                                                                                                                                                                                       |
| PhosphoTyrosine transition present     | 0/0          | 0 of 0 phosphotyrosine transitions were found.                                                                                                                                                                                                                                                                                                                                                                                                                                                                                                                                                                          |
| Six of top ten ions identified         | 6/6          | ion 1 (mass: 620.461: intensity: 188.97) assigned 0 times<br>ion 2 (mass: 931.428: intensity: 113.73) assigned 1 times<br>ion 3 (mass: 615.362: intensity: 98.99) assigned 0 times<br>ion 4 (mass: 614.498: intensity: 93.97) assigned 1 times<br>ion 5 (mass: 660.282: intensity: 92.73) assigned 0 times<br>ion 6 (mass: 621.414: intensity: 86.67) assigned 0 times<br>ion 7 (mass: 669.539: intensity: 71.95) assigned 2 times<br>ion 8 (mass: 600.341: intensity: 59.60) assigned 2 times<br>ion 9 (mass: 474.346: intensity: 57.16) assigned 1 times<br>ion 10 (mass: 784.402: intensity: 55.75) assigned 1 times |

## Ion Table

24 ions assigned of 57 ions above threshold (42%).

## N-terminal ions

| AA | N-ion | b                          | b*                     | b-98                          | bo                     |
|----|-------|----------------------------|------------------------|-------------------------------|------------------------|
| R  | 1     | 157.108                    | 140.082                | -                             | 139.098                |
| S  | 2     | 244.140<br>244.231 (4)     | 227.114                | -                             | 226.130                |
| t  | 3     | 425.154                    | 408.128                | 327.169<br>327.352 (12)       | 407.144                |
| F  | 4     | 572.223                    | 555.196                | 474.237<br>474.346 (30)       | 554.212                |
| P  | 5     | 669.276<br>*669.539 (38)   | 652.249                | 571.290                       | 651.265                |
| S  | 6     | 756.308                    | 739.281<br>739.245 (6) | 658.322                       | 738.297                |
| P  | 7     | 853.360                    | 836.334                | 755.375                       | 835.350<br>834.988 (8) |
| E  | 8     | 982.403<br>982.465 (9)     | 965.377                | 884.417<br>884.426 (23)       | 964.392                |
| A  | 9     | 1053.440                   | 1036.414               | 955.454<br>*478.172 [2+] (10) | 1035.430               |
| Q  | 10    | 1181.499<br>*1181.446 (14) | 1164.472               | 1083.513                      | 1163.488               |
| R  | 11    | -                          | -                      | -                             | -                      |

## C-terminal ions

| AA | C-ion | y                                           | y*                      | y-98                                           | yo                         |
|----|-------|---------------------------------------------|-------------------------|------------------------------------------------|----------------------------|
| R  | 11    | -                                           | -                       | -                                              | -                          |
| S  | 10    | 1199.509<br>*600.341 [2+] (31)              | 1182.483                | 1101.523<br>1101.624 (12)<br>551.355 [2+] (17) | 1181.499<br>*1181.446 (14) |
| t  | 9     | 1112.477                                    | 1095.451                | 1014.491<br>1014.646 (11)                      | 1094.467                   |
| F  | 8     | 931.463<br>931.428 (60)                     | 914.437                 | -                                              | 913.453                    |
| P  | 7     | 784.395<br>392.954 [2+] (8)<br>784.402 (29) | 767.368                 | -                                              | 766.384<br>766.431 (14)    |
| S  | 6     | 687.342                                     | 670.316<br>*670.274 (7) | -                                              | 669.332<br>*669.539 (38)   |
| P  | 5     | 600.310<br>*600.341 (31)                    | 583.284                 | -                                              | 582.300                    |
| E  | 4     | 503.257                                     | 486.231                 | -                                              | 485.247                    |
| A  | 3     | 374.215<br>374.252 (25)                     | 357.188                 | -                                              | 356.204                    |
| Q  | 2     | 303.178                                     | 286.151                 | -                                              | 285.167                    |
| R  | 1     | 175.119                                     | 158.092                 | -                                              | 157.108                    |

## Ion distribution

| Threshold | Ion count | Matches | % matched |
|-----------|-----------|---------|-----------|
| 0         | 57        | 24      | 42        |
| 0.5       | 57        | 24      | 42        |
| 1         | 57        | 24      | 42        |
| 2         | 55        | 24      | 43        |
| 3         | 49        | 23      | 46        |

|    |    |    |    |
|----|----|----|----|
| 4  | 49 | 23 | 46 |
| 5  | 47 | 22 | 46 |
| 10 | 30 | 15 | 50 |

### Observed ions > 1%

| m/z     | Intensity           | % max | Assignment (delta)                |
|---------|---------------------|-------|-----------------------------------|
| 208.003 | 3.65 <sub>3</sub>   | 1.93  |                                   |
| 210.245 | 3.94 <sub>3</sub>   | 2.08  |                                   |
| 244.231 | 8.60 <sub>3</sub>   | 4.55  | b2 (0.09)                         |
| 263.460 | 4.44 <sub>3</sub>   | 2.34  | a4o[2+] (-0.15)                   |
| 268.213 | 4.82 <sub>3</sub>   | 2.55  |                                   |
| 270.389 | 3.50 <sub>3</sub>   | 1.85  |                                   |
| 309.272 | 32.91 <sub>3</sub>  | 17.41 |                                   |
| 327.352 | 24.37 <sub>3</sub>  | 12.89 | b3-98 (0.18)                      |
| 354.300 | 14.88 <sub>3</sub>  | 7.87  |                                   |
| 374.252 | 47.70 <sub>3</sub>  | 25.24 | y3 (0.03)                         |
| 375.206 | 17.49 <sub>3</sub>  | 9.25  |                                   |
| 392.954 | 15.88 <sub>3</sub>  | 8.40  | y7[2+] (0.25)                     |
| 435.378 | 12.73 <sub>3</sub>  | 6.73  | c7[2+] (-0.31)                    |
| 464.762 | 15.17 <sub>3</sub>  | 8.02  |                                   |
| 474.346 | 57.16 <sub>3</sub>  | 30.24 | b4-98 (0.10)                      |
| 478.172 | 20.39 <sub>3</sub>  | 10.79 | a8[2+] (0.46) : b9-98[2+] (-0.05) |
| 492.344 | 51.82 <sub>3</sub>  | 27.42 |                                   |
| 513.549 | 16.91 <sub>3</sub>  | 8.94  | a9[2+] (0.32)                     |
| 551.355 | 32.75 <sub>3</sub>  | 17.33 | y10-98[2+] (0.08)                 |
| 600.341 | 59.60 <sub>3</sub>  | 31.53 | y10[2+] (0.08) : y5 (0.03)        |
| 602.206 | 43.53 <sub>3</sub>  | 23.03 |                                   |
| 607.567 | 43.36 <sub>3</sub>  | 22.94 |                                   |
| 614.498 | 93.97 <sub>3</sub>  | 49.72 | x10[2+] (0.24)                    |
| 615.362 | 98.99 <sub>3</sub>  | 52.38 |                                   |
| 620.461 | 188.97 <sub>3</sub> | 100   |                                   |
| 621.414 | 86.67 <sub>3</sub>  | 45.86 |                                   |
| 660.282 | 92.73 <sub>3</sub>  | 49.07 |                                   |
| 663.837 | 33.44 <sub>3</sub>  | 17.69 |                                   |
| 669.539 | 71.95 <sub>3</sub>  | 38.07 | b5 (0.26) : y6o (0.20)            |
| 670.274 | 14.50 <sub>3</sub>  | 7.67  | y6* (-0.04) : z6 (-0.04)          |
| 739.245 | 12.80 <sub>3</sub>  | 6.77  | b6* (-0.03)                       |
| 766.431 | 27.78 <sub>3</sub>  | 14.70 | y7o (0.04)                        |
| 784.402 | 55.75 <sub>3</sub>  | 29.50 | y7 (0.00)                         |
| 785.444 | 22.42 <sub>3</sub>  | 11.86 |                                   |
| 820.032 | 22.67 <sub>3</sub>  | 11.99 |                                   |
| 823.178 | 12.50 <sub>3</sub>  | 6.61  |                                   |

|          |                     |       |                            |
|----------|---------------------|-------|----------------------------|
| 834.988  | 15.53 <sub>3</sub>  | 8.21  | b7o (-0.36)                |
| 843.273  | 20.33 <sub>3</sub>  | 10.75 |                            |
| 864.315  | 33.42 <sub>3</sub>  | 17.68 |                            |
| 867.389  | 20.15 <sub>3</sub>  | 10.66 |                            |
| 884.426  | 44.82 <sub>3</sub>  | 23.71 | b8-98 (0.00)               |
| 931.428  | 113.73 <sub>3</sub> | 60.18 | y8 (-0.03)                 |
| 940.525  | 13.67 <sub>3</sub>  | 7.23  |                            |
| 982.465  | 18.30 <sub>3</sub>  | 9.68  | b8 (0.06)                  |
| 1010.329 | 17.08 <sub>3</sub>  | 9.03  |                            |
| 1014.646 | 21.30 <sub>3</sub>  | 11.27 | y9-98 (0.15)               |
| 1015.669 | 26.66 <sub>3</sub>  | 14.10 |                            |
| 1038.562 | 15.37 <sub>3</sub>  | 8.13  |                            |
| 1065.655 | 4.38 <sub>3</sub>   | 2.31  |                            |
| 1080.154 | 15.74 <sub>3</sub>  | 8.32  |                            |
| 1084.316 | 5.13 <sub>3</sub>   | 2.71  |                            |
| 1101.624 | 22.79 <sub>3</sub>  | 12.06 | y10-98 (0.10)              |
| 1102.465 | 9.11 <sub>3</sub>   | 4.82  |                            |
| 1129.333 | 14.50 <sub>3</sub>  | 7.67  |                            |
| 1181.446 | 26.79 <sub>3</sub>  | 14.17 | b10 (-0.05) : y10o (-0.05) |
| 1228.434 | 11.30 <sub>3</sub>  | 5.97  |                            |
| 1317.235 | 5.25                | 2.77  |                            |

**S1591**

# ProPhosSI MS/MS report

Mass: 600.258043 Charge: 2+

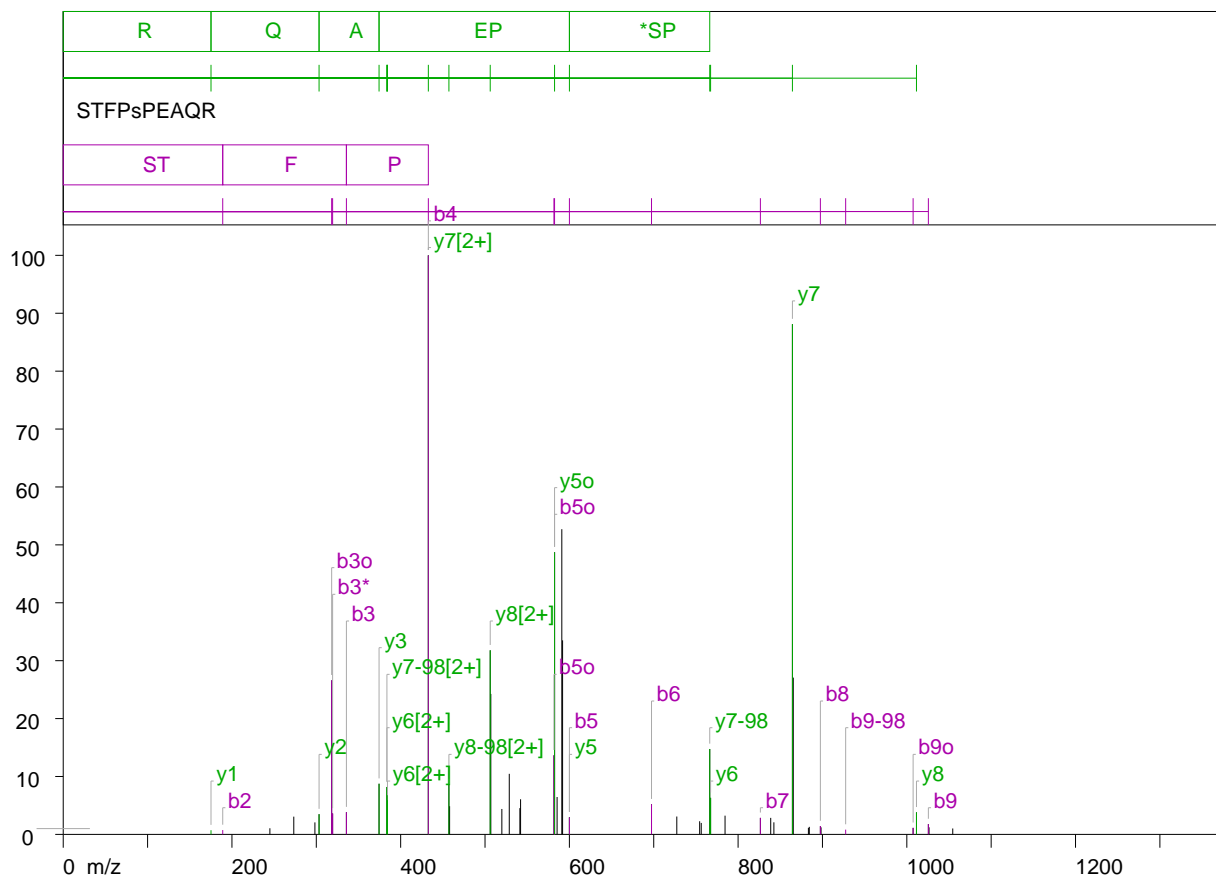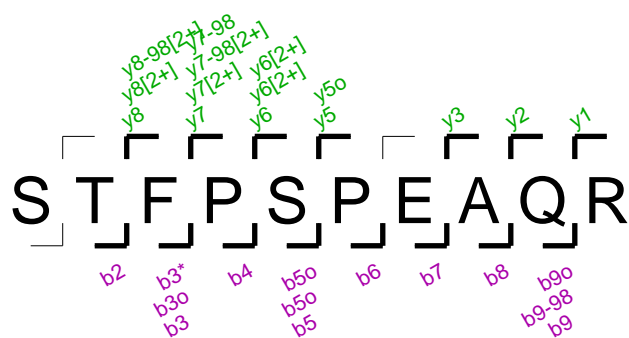



## Cav3.2 human

(37) 1587 ~STFPsPEAQR 1596 1198.501 (-0.0015) Da

|                         |     |
|-------------------------|-----|
| Parent Ion              | m/z |
| No parent ions observed |     |

## Modifications and supporting evidence

| Position | Residue ID | Modification | Evidence                |
|----------|------------|--------------|-------------------------|
| 5        | (1591)     | Phospho (ST) | b3=>b9-98,y3=>y8-98[2+] |

## Spectrum interpretation

| Rule                                   | passed/tests | Description                                                                                                                                                                                                                                                                                                                                                                                                                                                                                                                                                                                                                           |
|----------------------------------------|--------------|---------------------------------------------------------------------------------------------------------------------------------------------------------------------------------------------------------------------------------------------------------------------------------------------------------------------------------------------------------------------------------------------------------------------------------------------------------------------------------------------------------------------------------------------------------------------------------------------------------------------------------------|
| Parent ions present                    | 0/1          | Parent ions corresponding to the parent fragment - 1 phosphate ions were not found                                                                                                                                                                                                                                                                                                                                                                                                                                                                                                                                                    |
| Three -98 Ions present                 | 1/1          | 3 des-phospho fragment ions were found.                                                                                                                                                                                                                                                                                                                                                                                                                                                                                                                                                                                               |
| Unique -98 transitions present         | 1/1          | transition b3 to b9-98,transition y3 to y8-98[2+] support unique phosphorylation at position 5<br><br/>                                                                                                                                                                                                                                                                                                                                                                                                                                                                                                                               |
| Four Sequential b or y ions            | 0/1          | Sequence of four y or b ions not observed                                                                                                                                                                                                                                                                                                                                                                                                                                                                                                                                                                                             |
| Five of six sequential ions present    | 0/1          |                                                                                                                                                                                                                                                                                                                                                                                                                                                                                                                                                                                                                                       |
| Proline directed fragmentation pattern | 2/3          | PASS: y7-98> y6-98<br/><br>FAIL: b4> b3<br/>NOTE: S-P is a low abundance fragmentation.<br>PASS: y5> y4<br/><br>No proline ions at b6-98<br/>                                                                                                                                                                                                                                                                                                                                                                                                                                                                                         |
| PhosphoTyrosine transition present     | 0/0          | 0 of 0 phosphotyrosine transitions were found.                                                                                                                                                                                                                                                                                                                                                                                                                                                                                                                                                                                        |
| Six of top ten ions identified         | 6/6          | ion 1 (mass: 432.826: intensity: 3155.21) assigned 2 times<br>ion 2 (mass: 864.392: intensity: 2780.23) assigned 1 times<br>ion 3 (mass: 591.049: intensity: 1663.07) assigned 0 times<br>ion 4 (mass: 582.447: intensity: 1537.91) assigned 2 times<br>ion 5 (mass: 591.945: intensity: 1057.36) assigned 0 times<br>ion 6 (mass: 506.161: intensity: 1003.17) assigned 1 times<br>ion 7 (mass: 865.407: intensity: 854.30) assigned 0 times<br>ion 8 (mass: 318.205: intensity: 839.57) assigned 1 times<br>ion 9 (mass: 506.857: intensity: 765.39) assigned 0 times<br>ion 10 (mass: 766.389: intensity: 465.35) assigned 1 times |

## Ion Table

28 ions assigned of 54 ions above threshold (51%).

### N-terminal ions

| AA | N-ion | b                      | b*      | b-98 | bo      |
|----|-------|------------------------|---------|------|---------|
| S  | 1     | 88.039                 | 71.013  | -    | 70.029  |
| T  | 2     | 189.087<br>189.072 (0) | 172.060 | -    | 171.076 |

|   |    |                           |                        |                        |                                          |
|---|----|---------------------------|------------------------|------------------------|------------------------------------------|
| F | 3  | 336.155<br>335.702 (3)    | 319.129<br>319.355 (3) | -                      | 318.145<br>318.205 (26)                  |
| P | 4  | 433.208<br>*432.826 (100) | 416.182                | -                      | 415.198                                  |
| s | 5  | 600.207<br>*600.039 (2)   | 583.180                | 502.221                | 582.196<br>581.715 (13)<br>*582.447 (48) |
| P | 6  | 697.259<br>697.378 (5)    | 680.233                | 599.273                | 679.249                                  |
| E | 7  | 826.302<br>826.421 (2)    | 809.275                | 728.316                | 808.291                                  |
| A | 8  | 897.339<br>897.534 (1)    | 880.313                | 799.353                | 879.328                                  |
| Q | 9  | 1025.398<br>1025.569 (1)  | 1008.371               | 927.412<br>927.501 (0) | 1007.387<br>1007.479 (1)                 |
| R | 10 | -                         | -                      | -                      | -                                        |

### C-terminal ions

| AA | C-ion | y                                                               | y*       | y-98                                         | yo                       |
|----|-------|-----------------------------------------------------------------|----------|----------------------------------------------|--------------------------|
| S  | 10    | -                                                               | -        | -                                            | -                        |
| T  | 9     | 1112.477                                                        | 1095.451 | 1014.491                                     | 1094.467                 |
| F  | 8     | 1011.430<br>1011.458 (3)<br>506.161 [2+] (31)                   | 994.403  | 913.444<br>457.184 [2+] (8)                  | 993.419                  |
| P  | 7     | 864.361<br>864.392 (88)<br>*432.826 [2+] (100)                  | 847.335  | 766.375<br>*383.705 [2+] (8)<br>766.389 (14) | 846.351                  |
| s  | 6     | 767.308<br>767.389 (6)<br>*383.705 [2+] (8)<br>384.353 [2+] (5) | 750.282  | 669.323                                      | 749.298                  |
| P  | 5     | 600.310<br>*600.039 (2)                                         | 583.284  | -                                            | 582.300<br>*582.447 (48) |
| E  | 4     | 503.257                                                         | 486.231  | -                                            | 485.247                  |
| A  | 3     | 374.215<br>374.396 (8)                                          | 357.188  | -                                            | 356.204                  |
| Q  | 2     | 303.178<br>303.269 (3)                                          | 286.151  | -                                            | 285.167                  |
| R  | 1     | 175.119<br>175.179 (0)                                          | 158.092  | -                                            | 157.108                  |

### Ion distribution

| Threshold | Ion count | Matches | % matched |
|-----------|-----------|---------|-----------|
| 0         | 59        | 28      | 47        |
| 0.5       | 54        | 28      | 51        |
| 1         | 46        | 24      | 52        |
| 2         | 36        | 21      | 58        |
| 3         | 30        | 19      | 63        |
| 4         | 23        | 15      | 65        |
| 5         | 20        | 13      | 65        |
| 10        | 12        | 7       | 58        |

Observed ions > 1%

| m/z     | Intensity            | % max | Assignment (delta)                |
|---------|----------------------|-------|-----------------------------------|
| 244.965 | 33.40 <sub>2</sub>   | 1.05  |                                   |
| 273.313 | 96.75 <sub>2</sub>   | 3.06  |                                   |
| 298.339 | 65.46 <sub>2</sub>   | 2.07  |                                   |
| 303.269 | 110.17 <sub>2</sub>  | 3.49  | y2 (0.09)                         |
| 318.205 | 839.57 <sub>2</sub>  | 26.60 | b3o (0.05)                        |
| 319.355 | 113.97 <sub>2</sub>  | 3.61  | b3* (0.22)                        |
| 335.702 | 120.88 <sub>2</sub>  | 3.83  | b3 (-0.45)                        |
| 374.396 | 276.03 <sub>2</sub>  | 8.74  | y3 (0.18)                         |
| 383.705 | 258.33 <sub>2</sub>  | 8.18  | y7-98[2+] (0.01) : y6[2+] (-0.45) |
| 384.353 | 184.35 <sub>2</sub>  | 5.84  | y6[2+] (0.19)                     |
| 432.826 | 3155.21 <sub>2</sub> | 100   | y7[2+] (0.14) : b4 (-0.38)        |
| 457.184 | 274.17 <sub>2</sub>  | 8.68  | y8-98[2+] (-0.04)                 |
| 458.010 | 153.56 <sub>2</sub>  | 4.86  | c8[2+] (0.32)                     |
| 506.161 | 1003.17 <sub>2</sub> | 31.79 | y8[2+] (-0.05)                    |
| 506.857 | 765.39 <sub>2</sub>  | 24.25 |                                   |
| 519.952 | 138.53 <sub>2</sub>  | 4.39  | x8[2+] (-0.26)                    |
| 528.734 | 330.08 <sub>2</sub>  | 10.46 |                                   |
| 541.341 | 143.15 <sub>2</sub>  | 4.53  |                                   |
| 542.147 | 191.43 <sub>2</sub>  | 6.06  |                                   |
| 581.715 | 430.94 <sub>2</sub>  | 13.65 | b5o (-0.48)                       |
| 582.447 | 1537.91 <sub>2</sub> | 48.74 | b5o (0.25) : y5o (0.14)           |
| 585.443 | 203.72 <sub>2</sub>  | 6.45  |                                   |
| 591.049 | 1663.07 <sub>2</sub> | 52.70 |                                   |
| 591.945 | 1057.36 <sub>2</sub> | 33.51 |                                   |
| 600.039 | 93.20 <sub>2</sub>   | 2.95  | b5 (-0.16) : y5 (-0.27)           |
| 697.378 | 164.16 <sub>2</sub>  | 5.20  | b6 (0.11)                         |
| 727.346 | 97.41 <sub>2</sub>   | 3.08  |                                   |
| 754.451 | 71.65 <sub>2</sub>   | 2.27  |                                   |
| 756.304 | 62.45 <sub>2</sub>   | 1.97  |                                   |
| 766.389 | 465.35 <sub>2</sub>  | 14.74 | y7-98 (0.01)                      |
| 767.389 | 199.11 <sub>2</sub>  | 6.31  | y6 (0.08)                         |
| 784.523 | 102.12 <sub>2</sub>  | 3.23  |                                   |
| 826.421 | 89.97 <sub>2</sub>   | 2.85  | b7 (0.11)                         |
| 838.667 | 90.03 <sub>2</sub>   | 2.85  |                                   |
| 842.444 | 65.85 <sub>2</sub>   | 2.08  |                                   |
| 864.392 | 2780.23 <sub>2</sub> | 88.11 | y7 (0.03)                         |
| 865.407 | 854.30 <sub>2</sub>  | 27.07 |                                   |
| 883.346 | 35.69 <sub>2</sub>   | 1.13  |                                   |
| 884.417 | 41.12 <sub>2</sub>   | 1.30  |                                   |
| 897.534 | 45.09 <sub>2</sub>   | 1.42  | b8 (0.19)                         |
| 898.319 | 38.55 <sub>2</sub>   | 1.22  |                                   |

|          |         |      |            |
|----------|---------|------|------------|
| 1007.479 | 35.61,  | 1.12 | b9o (0.09) |
| 1011.458 | 120.01, | 3.80 | y8 (0.02)  |
| 1025.569 | 56.06,  | 1.77 | b9 (0.17)  |
| 1026.348 | 38.72,  | 1.22 |            |
| 1054.467 | 32.27,  | 1.02 |            |

**S1905**

# ProPhosSI MS/MS report

Mass: 647.649994 Charge: 3+

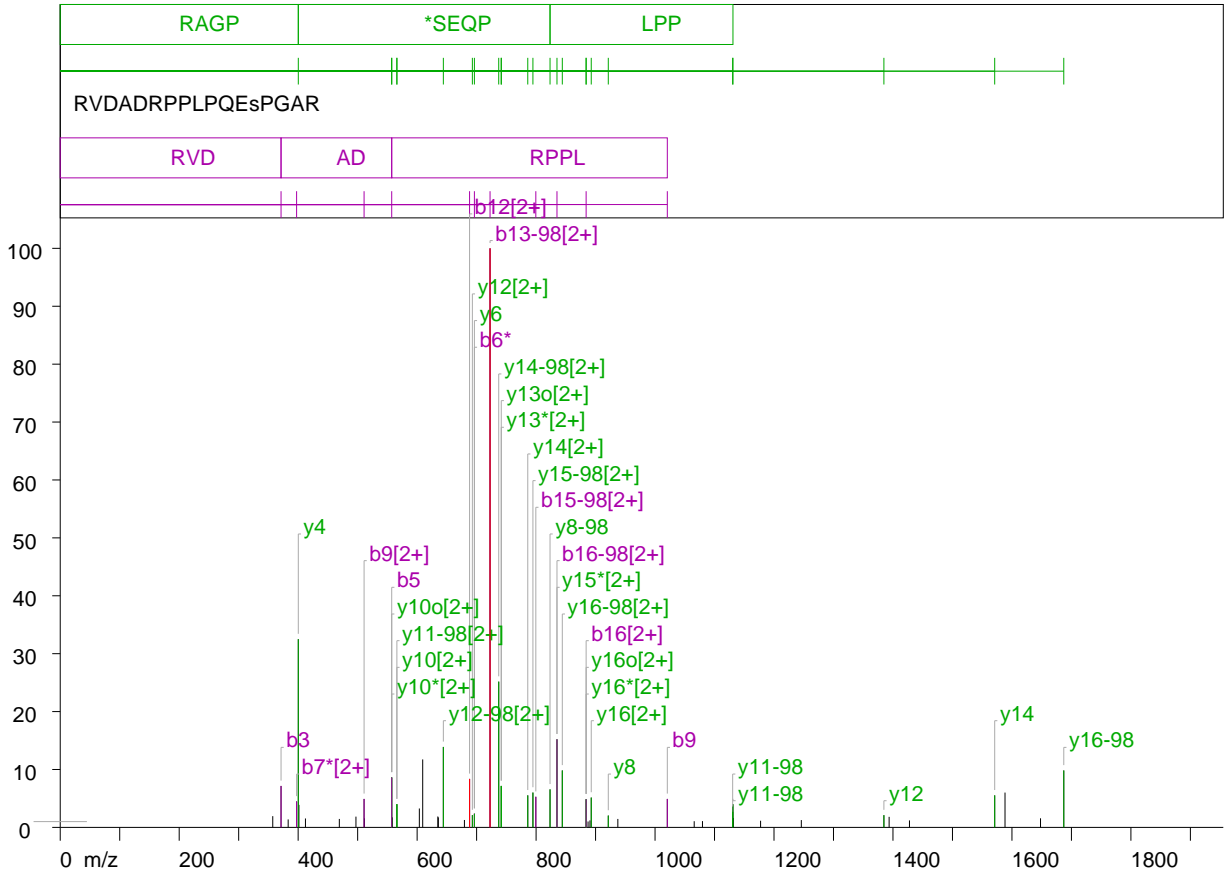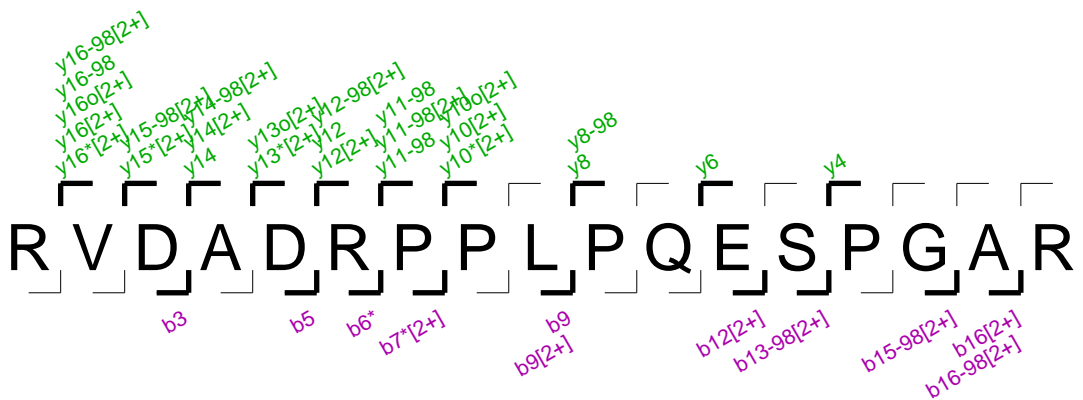

## Cav3.2 human

(41) 1893 RVDADRPPLPQEsPGAR 1909 1939.926 (-0.0001) Da

|                         |     |
|-------------------------|-----|
| Parent Ion              | m/z |
| No parent ions observed |     |

### Modifications and supporting evidence

| Position | Residue ID | Modification | Evidence                         |
|----------|------------|--------------|----------------------------------|
| 13       | (1905)     | Phospho (ST) | b12[2+] => b13-98[2+]; y4=>y8-98 |

### Spectrum interpretation

| Rule                                   | passed/tests | Description                                                                                                                                                                                                                                                                                                                                                                                                                                                                                                                                                                                                                                            |
|----------------------------------------|--------------|--------------------------------------------------------------------------------------------------------------------------------------------------------------------------------------------------------------------------------------------------------------------------------------------------------------------------------------------------------------------------------------------------------------------------------------------------------------------------------------------------------------------------------------------------------------------------------------------------------------------------------------------------------|
| Parent ions present                    | 0/1          | Parent ions corresponding to the parent fragment - 1 phosphate ions were not found                                                                                                                                                                                                                                                                                                                                                                                                                                                                                                                                                                     |
| Three -98 Ions present                 | 1/1          | 9 des-phospho fragment ions were found.                                                                                                                                                                                                                                                                                                                                                                                                                                                                                                                                                                                                                |
| Unique -98 transitions present         | 1/1          | transition b12[2+] to b13-98[2+], transition y4 to y8-98 support unique phosphorylation at position 13                                                                                                                                                                                                                                                                                                                                                                                                                                                                                                                                                 |
| Four Sequential b or y ions            | 0/1          | Sequence of four y or b ions not observed                                                                                                                                                                                                                                                                                                                                                                                                                                                                                                                                                                                                              |
| Five of six sequential ions present    | 1/1          | Five of Six ions found between y11 and y16                                                                                                                                                                                                                                                                                                                                                                                                                                                                                                                                                                                                             |
| Proline directed fragmentation pattern | 5/5          | PASS: y11-98> y10-98<br/>No proline ions at b7<br/>NOTE: P-P is a low abundance fragmentation.<br>No proline ions at y10-98<br>No proline ions at b8<br/>PASS: y8-98> y7-98<br/>PASS: b10< b9<br/>NOTE: S-P is a low abundance fragmentation.<br>PASS: y4> y3<br/>PASS: b14-98< b13-98<br/>                                                                                                                                                                                                                                                                                                                                                            |
| PhosphoTyrosine transition present     | 0/0          | 0 of 0 phosphotyrosine transitions were found.                                                                                                                                                                                                                                                                                                                                                                                                                                                                                                                                                                                                         |
| Six of top ten ions identified         | 10/6         | ion 1 (mass: 722.592: intensity: 350119.19) assigned 1 times<br>ion 2 (mass: 400.246: intensity: 113813.98) assigned 1 times<br>ion 3 (mass: 737.167: intensity: 88128.05) assigned 1 times<br>ion 4 (mass: 835.114: intensity: 53267.92) assigned 3 times<br>ion 5 (mass: 644.082: intensity: 48651.29) assigned 1 times<br>ion 6 (mass: 609.397: intensity: 41101.20) assigned 1 times<br>ion 7 (mass: 1687.148: intensity: 34433.76) assigned 1 times<br>ion 8 (mass: 844.078: intensity: 34433.76) assigned 1 times<br>ion 9 (mass: 557.278: intensity: 30205.00) assigned 4 times<br>ion 10 (mass: 688.175: intensity: 29310.47) assigned 1 times |

## Ion Table

29 ions assigned of 32 ions above threshold (90%).

### N-terminal ions

| AA | N-ion | b                                             | b*                           | b-98                           | bo       |
|----|-------|-----------------------------------------------|------------------------------|--------------------------------|----------|
| R  | 1     | 157.108                                       | 140.082                      | -                              | 139.098  |
| V  | 2     | 256.177                                       | 239.150                      | -                              | 238.166  |
| D  | 3     | 371.204<br>371.225 (7)                        | 354.177                      | -                              | 353.193  |
| A  | 4     | 442.241                                       | 425.214                      | -                              | 424.230  |
| D  | 5     | 557.268<br>*557.278 (8)                       | 540.241                      | -                              | 539.257  |
| R  | 6     | 713.369                                       | 696.342<br>*696.295 (2)      | -                              | 695.358  |
| P  | 7     | 810.422                                       | 793.395<br>*397.369 [2+] (4) | -                              | 792.411  |
| P  | 8     | 907.475                                       | 890.448                      | -                              | 889.464  |
| L  | 9     | 1020.559<br>1020.643 (4)<br>*510.825 [2+] (4) | 1003.532                     | -                              | 1002.548 |
| P  | 10    | 1117.611                                      | 1100.585                     | -                              | 1099.601 |
| Q  | 11    | 1245.670                                      | 1228.643                     | -                              | 1227.659 |
| E  | 12    | 1374.713<br>688.175 [2+] (8)                  | 1357.686                     | -                              | 1356.702 |
| s  | 13    | 1541.711                                      | 1524.684                     | 1443.725<br>722.592 [2+] (100) | 1523.700 |
| P  | 14    | 1638.764                                      | 1621.737                     | 1540.778                       | 1620.753 |
| G  | 15    | 1695.785                                      | 1678.759                     | 1597.799<br>*799.581 [2+] (5)  | 1677.775 |
| A  | 16    | 1766.822<br>*884.125 [2+] (4)                 | 1749.796                     | 1668.836<br>*835.114 [2+] (15) | 1748.812 |
| R  | 17    | -                                             | -                            | -                              | -        |

### C-terminal ions

| AA | C-ion | y                                            | y*                             | y-98                                                          | yo                            |
|----|-------|----------------------------------------------|--------------------------------|---------------------------------------------------------------|-------------------------------|
| R  | 17    | -                                            | -                              | -                                                             | -                             |
| V  | 16    | 1784.833<br>*892.724 [2+] (5)                | 1767.806<br>*884.125 [2+] (4)  | 1686.847<br>1687.148 (9)<br>844.078 [2+] (9)                  | 1766.822<br>*884.125 [2+] (4) |
| D  | 15    | 1685.764                                     | 1668.738<br>*835.114 [2+] (15) | 1587.778<br>794.686 [2+] (6)                                  | 1667.754                      |
| A  | 14    | 1570.737<br>1570.994 (5)<br>786.000 [2+] (5) | 1553.711                       | 1472.752<br>737.167 [2+] (25)                                 | 1552.727                      |
| D  | 13    | 1499.700                                     | 1482.674<br>*741.443 [2+] (7)  | 1401.714                                                      | 1481.690<br>*741.443 [2+] (7) |
| R  | 12    | 1384.673<br>692.873 [2+] (2)<br>1384.739 (2) | 1367.647                       | 1286.687<br>644.082 [2+] (13)                                 | 1366.663                      |
| P  | 11    | 1228.572                                     | 1211.546                       | 1130.586<br>1130.977 (4)<br>*565.992 [2+] (4)<br>1130.495 (2) | 1210.562                      |
| P  | 10    | 1131.519<br>*565.992 [2+] (4)                | 1114.493<br>*557.278 [2+] (8)  | 1033.534                                                      | 1113.509<br>*557.278 [2+] (8) |
| L  | 9     | 1034.467                                     | 1017.440                       | 936.481                                                       | 1016.456                      |
| P  | 8     | 921.383<br>921.381 (2)                       | 904.356                        | 823.397<br>823.441 (6)                                        | 903.372                       |



|   |   |                         |         |         |         |
|---|---|-------------------------|---------|---------|---------|
| Q | 7 | 824.330                 | 807.303 | 726.344 | 806.319 |
| E | 6 | 696.271<br>*696.295 (2) | 679.245 | 598.285 | 678.261 |
| s | 5 | 567.229                 | 550.202 | 469.243 | 549.218 |
| P | 4 | 400.230<br>400.246 (32) | 383.204 | -       | 382.220 |
| G | 3 | 303.178                 | 286.151 | -       | 285.167 |
| A | 2 | 246.156                 | 229.130 | -       | 228.146 |
| R | 1 | 175.119                 | 158.092 | -       | 157.108 |

### Ion distribution

| Threshold | Ion count | Matches | % matched |
|-----------|-----------|---------|-----------|
| 0         | 95        | 52      | 54        |
| 0.5       | 76        | 48      | 63        |
| 1         | 53        | 39      | 73        |
| 2         | 32        | 29      | 90        |
| 3         | 27        | 24      | 88        |
| 4         | 23        | 22      | 95        |
| 5         | 19        | 18      | 94        |
| 10        | 6         | 6       | 100       |

### Observed ions > 1%

| m/z     | Intensity              | % max | Assignment (delta)                                               |
|---------|------------------------|-------|------------------------------------------------------------------|
| 357.288 | 6798.68 <sub>2</sub>   | 1.94  | b6[2+] (0.09)                                                    |
| 371.225 | 25072.07 <sub>2</sub>  | 7.16  | b3 (0.02)                                                        |
| 383.212 | 4817.45 <sub>2</sub>   | 1.37  | a7o[2+] (0.49) : y4* (0.00) : z4 (0.00) : a7*[2+] (0.00)         |
| 397.369 | 15686.45 <sub>2</sub>  | 4.48  | b7*[2+] (0.16) : a4* (0.14)                                      |
| 400.246 | 113813.98 <sub>2</sub> | 32.50 | y4 (0.01)                                                        |
| 401.271 | 13628.23 <sub>2</sub>  | 3.89  |                                                                  |
| 412.255 | 5392.96 <sub>2</sub>   | 1.54  | y8-98[2+] (0.05) : y7[2+] (-0.41)                                |
| 469.229 | 5115.51 <sub>2</sub>   | 1.46  | y9-98[2+] (0.48) : y5-98 (-0.01)                                 |
| 497.154 | 6511.17 <sub>2</sub>   | 1.85  | a9[2+] (0.36)                                                    |
| 510.825 | 17214.72 <sub>2</sub>  | 4.91  | b9[2+] (0.04) : a5o (-0.43)                                      |
| 511.477 | 5488.91 <sub>2</sub>   | 1.56  | a5o (0.21)                                                       |
| 557.278 | 30205.00 <sub>2</sub>  | 8.62  | y10o[2+] (0.01) : b5 (0.00) : y10*[2+] (-0.47) : z10[2+] (-0.47) |
| 558.366 | 6068.49 <sub>2</sub>   | 1.73  |                                                                  |
| 565.992 | 14028.22 <sub>2</sub>  | 4.00  | y11-98[2+] (0.19) : y10[2+] (-0.27)                              |
| 603.727 | 11436.71 <sub>2</sub>  | 3.26  |                                                                  |
| 609.397 | 41101.20 <sub>2</sub>  | 11.73 | a11[2+] (0.05)                                                   |
| 634.824 | 6600.00 <sub>2</sub>   | 1.88  |                                                                  |

|          |                        |       |                                                                             |
|----------|------------------------|-------|-----------------------------------------------------------------------------|
| 635.667  | 6038.68 <sub>3</sub>   | 1.72  |                                                                             |
| 644.082  | 48651.29 <sub>3</sub>  | 13.89 | y12-98[2+] (0.23)                                                           |
| 679.527  | 4484.76 <sub>3</sub>   | 1.28  | y6* (0.28) : z6 (0.28) :<br>b12*[2+] (0.17)                                 |
| 688.175  | 29310.47 <sub>3</sub>  | 8.37  | b12[2+] (0.31)                                                              |
| 692.873  | 7386.86 <sub>3</sub>   | 2.10  | y12[2+] (0.03)                                                              |
| 696.295  | 8295.95 <sub>3</sub>   | 2.36  | y6 (0.02) : b6* (-0.04) :<br>c12[2+] (-0.07)                                |
| 722.592  | 350119.19 <sub>3</sub> | 100   | b13-98[2+] (0.22)                                                           |
| 737.167  | 88128.05 <sub>3</sub>  | 25.17 | y14-98[2+] (0.28)                                                           |
| 741.443  | 25072.07 <sub>3</sub>  | 7.16  | y13o[2+] (0.09) : y13*[2+]<br>(-0.39) : z13[2+] (-0.39)                     |
| 786.000  | 19372.68 <sub>3</sub>  | 5.53  | y14[2+] (0.12)                                                              |
| 794.686  | 21059.75 <sub>3</sub>  | 6.01  | y15-98[2+] (0.29)                                                           |
| 799.581  | 18516.87 <sub>3</sub>  | 5.28  | b15-98[2+] (0.17) : x14[2+]<br>(-0.28)                                      |
| 823.441  | 22986.14 <sub>3</sub>  | 6.56  | y8-98 (0.04)                                                                |
| 835.114  | 53267.92 <sub>3</sub>  | 15.21 | y15*[2+] (0.24) : z15[2+]<br>(0.24) : b16-98[2+] (0.19)                     |
| 844.078  | 34433.76 <sub>3</sub>  | 9.83  | y16-98[2+] (0.15)                                                           |
| 884.125  | 17043.96 <sub>3</sub>  | 4.86  | y16o[2+] (0.20) : b16[2+]<br>(0.20) : y16*[2+] (-0.28) :<br>z16[2+] (-0.28) |
| 887.339  | 3571.97 <sub>3</sub>   | 1.02  |                                                                             |
| 890.594  | 4234.24 <sub>3</sub>   | 1.20  | b8* (0.14)                                                                  |
| 892.724  | 18034.12 <sub>3</sub>  | 5.15  | c16[2+] (0.29) : y16[2+]<br>(-0.19)                                         |
| 921.381  | 7152.78 <sub>3</sub>   | 2.04  | y8 (-0.00)                                                                  |
| 937.451  | 5115.51 <sub>3</sub>   | 1.46  |                                                                             |
| 1020.643 | 17214.72 <sub>3</sub>  | 4.91  | b9 (0.08)                                                                   |
| 1065.830 | 3742.86 <sub>3</sub>   | 1.06  |                                                                             |
| 1079.726 | 3804.28 <sub>3</sub>   | 1.08  |                                                                             |
| 1130.495 | 9381.96 <sub>3</sub>   | 2.67  | y11-98 (-0.09)                                                              |
| 1130.977 | 14028.22 <sub>3</sub>  | 4.00  | y11-98 (0.39)                                                               |
| 1131.577 | 5717.91 <sub>3</sub>   | 1.63  | y10 (0.05)                                                                  |
| 1177.412 | 4028.16 <sub>3</sub>   | 1.15  |                                                                             |
| 1245.894 | 4430.21 <sub>3</sub>   | 1.26  | b11 (0.22)                                                                  |
| 1384.739 | 7386.86 <sub>3</sub>   | 2.10  | y12 (0.06)                                                                  |
| 1393.503 | 6389.23 <sub>3</sub>   | 1.82  |                                                                             |
| 1427.737 | 4218.03 <sub>3</sub>   | 1.20  |                                                                             |
| 1570.994 | 19372.68 <sub>3</sub>  | 5.53  | y14 (0.25)                                                                  |
| 1588.364 | 21059.75 <sub>3</sub>  | 6.01  |                                                                             |
| 1648.046 | 5504.77 <sub>3</sub>   | 1.57  |                                                                             |
| 1687.148 | 34433.76 <sub>3</sub>  | 9.83  | y16-98 (0.30)                                                               |

S1926

# ProPhosSI MS/MS report

Mass: 777.329104 Charge: 2+

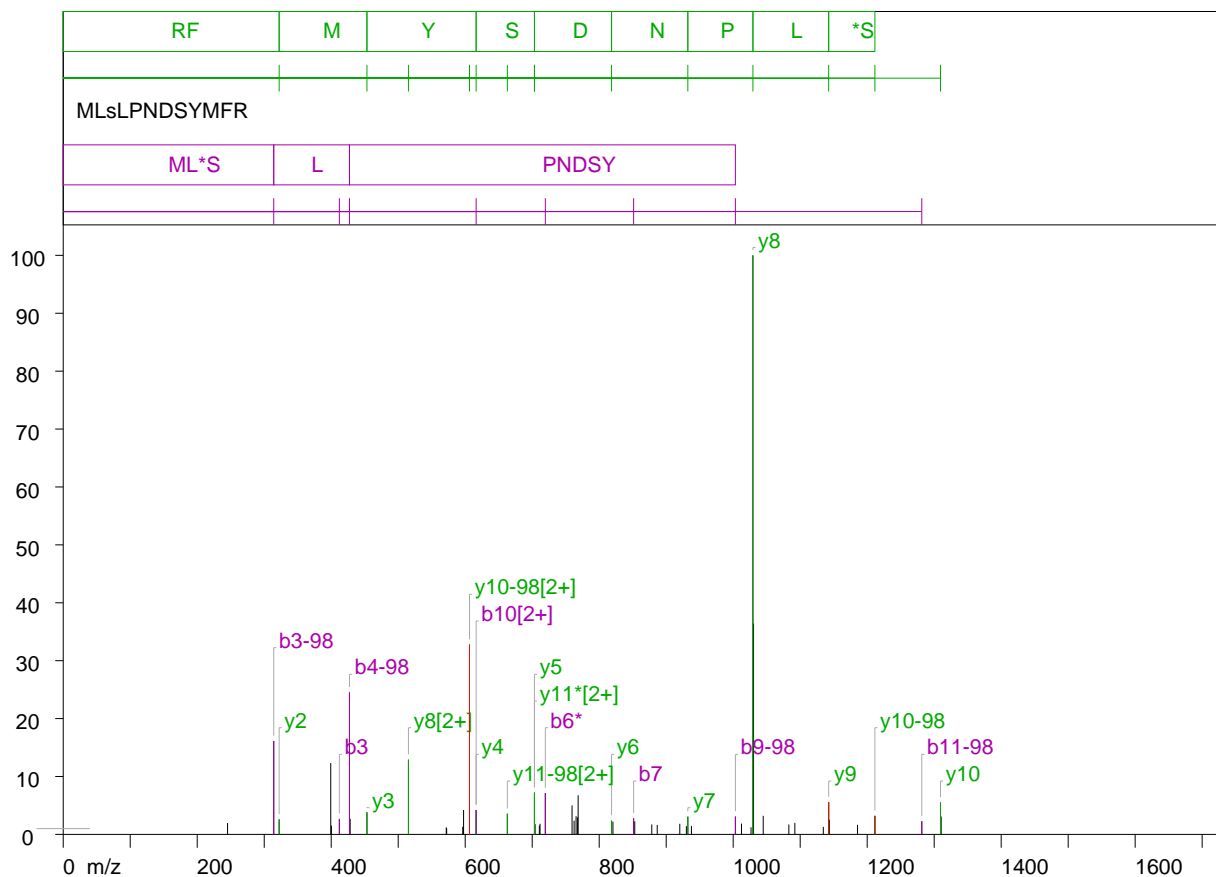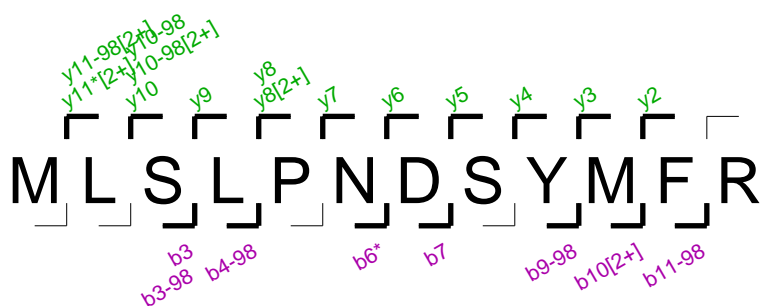

## Cav3.2 human

(61) 1924 MLsLPNDSYMF 1935 1552.645 (-0.0030) Da

|                         |     |
|-------------------------|-----|
| Parent Ion              | m/z |
| No parent ions observed |     |

## Modifications and supporting evidence

| Position | Residue ID | Modification | Evidence         |
|----------|------------|--------------|------------------|
| 3        | (1926)     | Phospho (ST) | y9 => y10-98[2+] |

## Spectrum interpretation

| Rule                                   | passed/tests | Description                                                                                                                                                                                                                                                                                                                                                                                                                                                                                                                                                                                                                               |
|----------------------------------------|--------------|-------------------------------------------------------------------------------------------------------------------------------------------------------------------------------------------------------------------------------------------------------------------------------------------------------------------------------------------------------------------------------------------------------------------------------------------------------------------------------------------------------------------------------------------------------------------------------------------------------------------------------------------|
| Parent ions present                    | 0/1          | Parent ions corresponding to the parent fragment - 1 phosphate ions were not found                                                                                                                                                                                                                                                                                                                                                                                                                                                                                                                                                        |
| Three -98 ions present                 | 1/1          | 6 des-phospho fragment ions were found.                                                                                                                                                                                                                                                                                                                                                                                                                                                                                                                                                                                                   |
| Unique -98 transitions present         | 1/1          | transition y9 to y10-98[2+] support unique phosphorylation at position 3<br><br/>                                                                                                                                                                                                                                                                                                                                                                                                                                                                                                                                                         |
| Four Sequential b or y ions            | 1/1          | Sequence of four y ions found from y2 to y5.                                                                                                                                                                                                                                                                                                                                                                                                                                                                                                                                                                                              |
| Five of six sequential ions present    | 1/1          | Five of Six ions found between y1 and y6<br>Five of Six ions found between y2 and y7<br>Five of Six ions found between y3 and y8<br>Five of Six ions found between y4 and y9<br>Five of Six ions found between y5 and y10<br>Five of Six ions found between y6 and y11<br>Five of Six ions found between y7 and y12                                                                                                                                                                                                                                                                                                                       |
| Proline directed fragmentation pattern | 2/2          | PASS: y8> y7 with ratio 32.6<br/>PASS: b5-98< b4-98<br/>                                                                                                                                                                                                                                                                                                                                                                                                                                                                                                                                                                                  |
| PhosphoTyrosine transition present     | 0/0          | 0 of 0 phosphotyrosine transitions were found.                                                                                                                                                                                                                                                                                                                                                                                                                                                                                                                                                                                            |
| Six of top ten ions identified         | 7/6          | ion 1 (mass: 1029.435: intensity: 13770.20) assigned 1 times<br>ion 2 (mass: 1030.389: intensity: 5011.35) assigned 0 times<br>ion 3 (mass: 606.404: intensity: 4512.41) assigned 1 times<br>ion 4 (mass: 427.238: intensity: 3376.18) assigned 1 times<br>ion 5 (mass: 314.196: intensity: 2222.28) assigned 1 times<br>ion 6 (mass: 515.294: intensity: 1776.61) assigned 1 times<br>ion 7 (mass: 399.293: intensity: 1696.50) assigned 0 times<br>ion 8 (mass: 703.338: intensity: 993.24) assigned 3 times<br>ion 9 (mass: 719.598: intensity: 983.05) assigned 1 times<br>ion 10 (mass: 768.557: intensity: 928.38) assigned 0 times |

## Ion Table

20 ions assigned of 35 ions above threshold (57%).

### N-terminal ions

| AA | N-ion | b                             | b*                     | b-98                     | bo       |
|----|-------|-------------------------------|------------------------|--------------------------|----------|
| M  | 1     | 132.048                       | 115.021                | -                        | 114.037  |
| L  | 2     | 245.132                       | 228.105                | -                        | 227.121  |
| s  | 3     | 412.130<br>*412.165 (2)       | 395.104                | 314.144<br>314.196 (16)  | 394.120  |
| L  | 4     | 525.214                       | 508.188                | 427.228<br>427.238 (24)  | 507.204  |
| P  | 5     | 622.267                       | 605.241                | 524.281                  | 604.256  |
| N  | 6     | 736.310                       | 719.283<br>719.598 (7) | 638.324                  | 718.299  |
| D  | 7     | 851.337<br>851.380 (2)        | 834.310                | 753.351                  | 833.326  |
| S  | 8     | 938.369                       | 921.342                | 840.383                  | 920.358  |
| Y  | 9     | 1101.432                      | 1084.406               | 1003.446<br>1003.306 (3) | 1083.422 |
| M  | 10    | 1232.473<br>*616.337 [2+] (4) | 1215.446               | 1134.487                 | 1214.462 |
| F  | 11    | 1379.541                      | 1362.515               | 1281.555<br>1281.486 (2) | 1361.531 |
| R  | 12    | -                             | -                      | -                        | -        |

### C-terminal ions

| AA | C-ion | y                                               | y*                            | y-98                                          | yo       |
|----|-------|-------------------------------------------------|-------------------------------|-----------------------------------------------|----------|
| M  | 12    | -                                               | -                             | -                                             | -        |
| L  | 11    | 1422.612                                        | 1405.586<br>*703.338 [2+] (7) | 1324.626<br>662.895 [2+] (3)                  | 1404.602 |
| s  | 10    | 1309.528<br>1309.416 (5)                        | 1292.502                      | 1211.542<br>606.404 [2+] (32)<br>1211.498 (3) | 1291.518 |
| L  | 9     | 1142.530<br>1142.527 (5)                        | 1125.503                      | -                                             | 1124.519 |
| P  | 8     | 1029.446<br>515.294 [2+] (12)<br>1029.435 (100) | 1012.419                      | -                                             | 1011.435 |
| N  | 7     | 932.393<br>932.306 (3)                          | 915.367                       | -                                             | 914.383  |
| D  | 6     | 818.350<br>818.429 (2)                          | 801.324                       | -                                             | 800.340  |
| S  | 5     | 703.323<br>*703.338 (7)                         | 686.297                       | -                                             | 685.313  |
| Y  | 4     | 616.291<br>*616.337 (4)                         | 599.265                       | -                                             | 598.281  |
| M  | 3     | 453.228<br>453.353 (3)                          | 436.201                       | -                                             | 435.217  |
| F  | 2     | 322.187<br>*322.320 (2)                         | 305.161                       | -                                             | 304.177  |
| R  | 1     | 175.119                                         | 158.092                       | -                                             | 157.108  |

### Ion distribution

| Threshold | Ion count | Matches | % matched |
|-----------|-----------|---------|-----------|
| 0         | 79        | 36      | 45        |

|     |    |    |    |
|-----|----|----|----|
| 0.5 | 62 | 30 | 48 |
| 1   | 53 | 28 | 52 |
| 2   | 34 | 20 | 58 |
| 3   | 23 | 15 | 65 |
| 4   | 15 | 10 | 66 |
| 5   | 12 | 9  | 75 |
| 10  | 7  | 5  | 71 |

### Observed ions > 1%

| m/z     | Intensity            | % max | Assignment (delta)                           |
|---------|----------------------|-------|----------------------------------------------|
| 245.273 | 271.15 <sub>3</sub>  | 1.96  | b2 (0.14)                                    |
| 314.196 | 2222.28 <sub>3</sub> | 16.13 | b3-98 (0.05)                                 |
| 322.320 | 356.75 <sub>3</sub>  | 2.59  | y2 (0.13) : x4[2+] (-0.32)                   |
| 399.293 | 1696.50 <sub>3</sub> | 12.32 |                                              |
| 400.292 | 206.88 <sub>3</sub>  | 1.50  | y6o[2+] (-0.38)                              |
| 412.165 | 368.62 <sub>3</sub>  | 2.67  | b3 (0.03) : a7[2+] (-0.01)                   |
| 427.238 | 3376.18 <sub>3</sub> | 24.51 | b4-98 (0.00)                                 |
| 428.286 | 371.44 <sub>3</sub>  | 2.69  |                                              |
| 453.353 | 526.46 <sub>3</sub>  | 3.82  | y3 (0.12)                                    |
| 515.294 | 1776.61 <sub>3</sub> | 12.90 | y8[2+] (0.06)                                |
| 571.692 | 167.65 <sub>3</sub>  | 1.21  | y9[2+] (-0.07)                               |
| 572.317 | 143.76 <sub>3</sub>  | 1.04  |                                              |
| 596.298 | 181.08 <sub>3</sub>  | 1.31  |                                              |
| 597.557 | 580.54 <sub>3</sub>  | 4.21  |                                              |
| 606.404 | 4512.41 <sub>3</sub> | 32.76 | y10-98[2+] (0.12)                            |
| 616.337 | 579.20 <sub>3</sub>  | 4.20  | y4 (0.04) : b10[2+] (-0.40)                  |
| 662.895 | 492.21 <sub>3</sub>  | 3.57  | y11-98[2+] (0.07)                            |
| 703.338 | 993.24 <sub>3</sub>  | 7.21  | y11*[2+] (0.04) : z11[2+] (0.04) : y5 (0.01) |
| 704.358 | 243.48 <sub>3</sub>  | 1.76  |                                              |
| 710.686 | 210.10 <sub>3</sub>  | 1.52  |                                              |
| 711.674 | 252.09 <sub>3</sub>  | 1.83  | y11[2+] (-0.13)                              |
| 719.598 | 983.05 <sub>3</sub>  | 7.13  | b6* (0.31)                                   |
| 759.471 | 689.85 <sub>3</sub>  | 5.00  |                                              |
| 762.548 | 325.89 <sub>3</sub>  | 2.36  |                                              |
| 765.482 | 432.33 <sub>3</sub>  | 3.13  |                                              |
| 767.718 | 406.51 <sub>3</sub>  | 2.95  |                                              |
| 768.557 | 928.38 <sub>3</sub>  | 6.74  |                                              |
| 818.429 | 328.18 <sub>3</sub>  | 2.38  | y6 (0.07)                                    |
| 820.497 | 303.15 <sub>3</sub>  | 2.20  |                                              |
| 851.380 | 381.11 <sub>3</sub>  | 2.76  | b7 (0.04)                                    |
| 853.070 | 310.89 <sub>3</sub>  | 2.25  |                                              |
| 878.463 | 236.01 <sub>3</sub>  | 1.71  |                                              |

|          |                       |       |                          |
|----------|-----------------------|-------|--------------------------|
| 886.594  | 225.95 <sub>3</sub>   | 1.64  |                          |
| 920.296  | 251.71 <sub>3</sub>   | 1.82  | b8o (-0.06)              |
| 930.114  | 195.41 <sub>3</sub>   | 1.41  |                          |
| 932.306  | 421.54 <sub>3</sub>   | 3.06  | y7 (-0.08)               |
| 937.662  | 201.61 <sub>3</sub>   | 1.46  |                          |
| 1003.306 | 424.34 <sub>3</sub>   | 3.08  | b9-98 (-0.14)            |
| 1012.361 | 256.14 <sub>3</sub>   | 1.86  | y8* (-0.05) : z8 (-0.05) |
| 1026.603 | 168.95 <sub>3</sub>   | 1.22  |                          |
| 1029.435 | 13770.20 <sub>3</sub> | 100   | y8 (-0.01)               |
| 1030.389 | 5011.35 <sub>3</sub>  | 36.39 |                          |
| 1044.831 | 441.78 <sub>3</sub>   | 3.20  |                          |
| 1083.078 | 234.76 <sub>3</sub>   | 1.70  | b9o (-0.34)              |
| 1092.016 | 275.42 <sub>3</sub>   | 2.00  |                          |
| 1134.497 | 180.11 <sub>3</sub>   | 1.30  | b10-98 (0.00)            |
| 1142.527 | 765.87 <sub>3</sub>   | 5.56  | y9 (-0.00)               |
| 1143.512 | 349.80 <sub>3</sub>   | 2.54  |                          |
| 1185.594 | 228.09 <sub>3</sub>   | 1.65  |                          |
| 1211.498 | 441.52 <sub>3</sub>   | 3.20  | y10-98 (-0.04)           |
| 1281.486 | 312.82 <sub>3</sub>   | 2.27  | b11-98 (-0.06)           |
| 1309.416 | 757.07 <sub>3</sub>   | 5.49  | y10 (-0.11)              |
| 1310.388 | 426.23 <sub>3</sub>   | 3.09  |                          |



S1970

# ProPhosSI MS/MS report

Mass: 868.372151 Charge: 2+

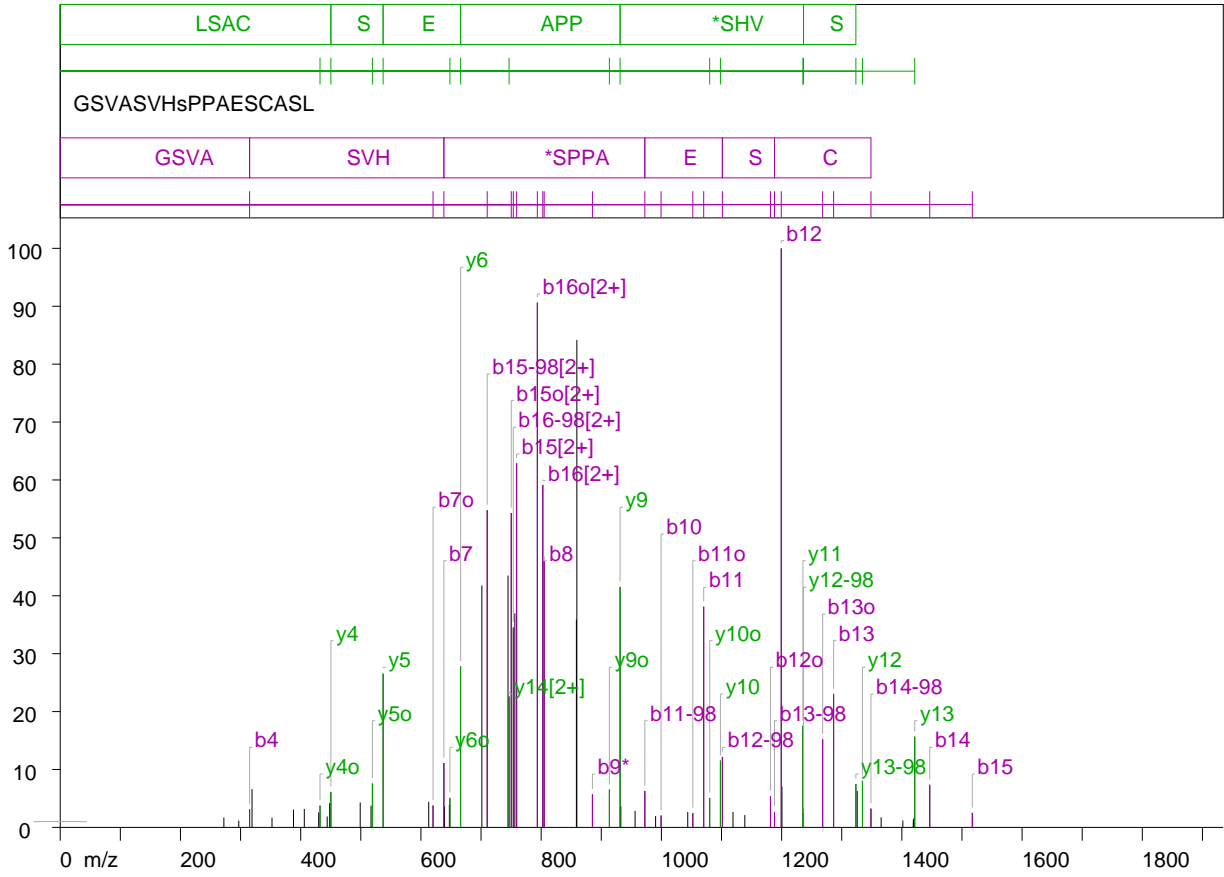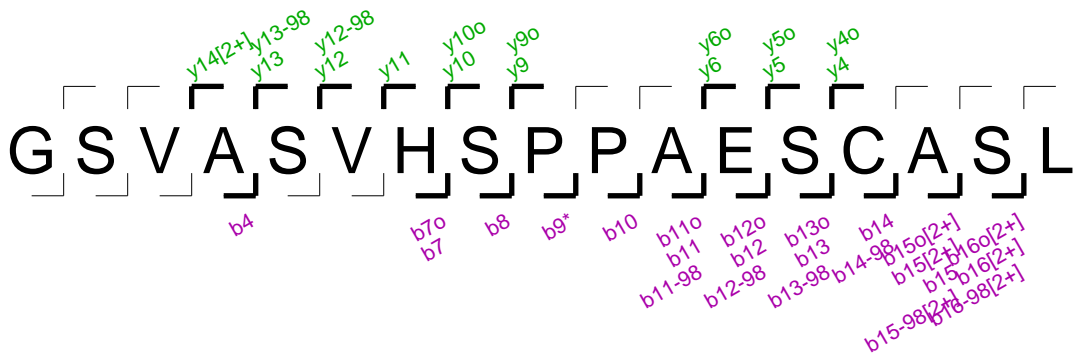

## Cav3.2 human

(60) 1963 GSVASVHsPPAESCASL 1979 1734.728 (0.0002) Da

|                         |     |
|-------------------------|-----|
| Parent Ion              | m/z |
| No parent ions observed |     |

## Modifications and supporting evidence

| Position | Residue ID | Modification | Evidence              |
|----------|------------|--------------|-----------------------|
| 8        | (1970)     | Phospho (ST) | b7=>b11-98,y9=>y13-98 |

## Spectrum interpretation

| Rule                                   | passed/tests | Description                                                                                                                                                                                                                                                                                                                                                                                                                                                                                                                                                                                                                             |
|----------------------------------------|--------------|-----------------------------------------------------------------------------------------------------------------------------------------------------------------------------------------------------------------------------------------------------------------------------------------------------------------------------------------------------------------------------------------------------------------------------------------------------------------------------------------------------------------------------------------------------------------------------------------------------------------------------------------|
| Parent ions present                    | 0/1          | Parent ions corresponding to the parent fragment - 1 phosphate ions were not found                                                                                                                                                                                                                                                                                                                                                                                                                                                                                                                                                      |
| Three -98 Ions present                 | 1/1          | 8 des-phospho fragment ions were found.                                                                                                                                                                                                                                                                                                                                                                                                                                                                                                                                                                                                 |
| Unique -98 transitions present         | 1/1          | transition b7 to b11-98,transition y9 to y13-98 support unique phosphorylation at position 8<br><br/>                                                                                                                                                                                                                                                                                                                                                                                                                                                                                                                                   |
| Four Sequential b or y ions            | 1/1          | Sequence of four b ions found from b11-98 to b14-98.                                                                                                                                                                                                                                                                                                                                                                                                                                                                                                                                                                                    |
| Five of six sequential ions present    | 1/1          | Five of Six ions found between b10 and b15<br>Five of Six ions found between b11 and b16<br>Five of Six ions found between b12 and b17                                                                                                                                                                                                                                                                                                                                                                                                                                                                                                  |
| Proline directed fragmentation pattern | 1/1          | NOTE: S-P is a low abundance fragmentation.<br>PASS: y9> y8<br/><br>No proline ions at b9-98<br/><br>NOTE: P-P is a low abundance fragmentation.<br>No proline ions at y8<br>No proline ions at b10-98<br/>                                                                                                                                                                                                                                                                                                                                                                                                                             |
| PhosphoTyrosine transition present     | 0/0          | 0 of 0 phosphotyrosine transitions were found.                                                                                                                                                                                                                                                                                                                                                                                                                                                                                                                                                                                          |
| Six of top ten ions identified         | 9/6          | ion 1 (mass: 1199.415: intensity: 2120.36) assigned 1 times<br>ion 2 (mass: 793.655: intensity: 1921.81) assigned 1 times<br>ion 3 (mass: 859.365: intensity: 1784.99) assigned 0 times<br>ion 4 (mass: 759.240: intensity: 1333.39) assigned 2 times<br>ion 5 (mass: 802.761: intensity: 1254.18) assigned 1 times<br>ion 6 (mass: 710.221: intensity: 1161.60) assigned 2 times<br>ion 7 (mass: 750.255: intensity: 1151.12) assigned 1 times<br>ion 8 (mass: 805.019: intensity: 974.87) assigned 1 times<br>ion 9 (mass: 744.859: intensity: 922.30) assigned 1 times<br>ion 10 (mass: 701.352: intensity: 886.00) assigned 1 times |

## Ion Table

42 ions assigned of 62 ions above threshold (67%).

### N-terminal ions

| AA | N-ion | b                                              | b*                     | b-98                           | bo                            |
|----|-------|------------------------------------------------|------------------------|--------------------------------|-------------------------------|
| G  | 1     | 58.029                                         | 41.002                 | -                              | 40.018                        |
| S  | 2     | 145.061                                        | 128.034                | -                              | 127.050                       |
| V  | 3     | 244.129                                        | 227.103                | -                              | 226.119                       |
| A  | 4     | 315.166<br>315.022 (3)                         | 298.140                | -                              | 297.156                       |
| S  | 5     | 402.198                                        | 385.172                | -                              | 384.188                       |
| V  | 6     | 501.267                                        | 484.240                | -                              | 483.256                       |
| H  | 7     | 638.326<br>638.196 (11)                        | 621.299                | -                              | 620.315<br>620.167 (3)        |
| s  | 8     | 805.324<br>805.019 (45)                        | 788.298                | 707.338                        | 787.313                       |
| P  | 9     | 902.377                                        | 885.350<br>885.266 (5) | 804.391                        | 884.366                       |
| P  | 10    | 999.430<br>999.481 (2)                         | 982.403                | 901.444                        | 981.419                       |
| A  | 11    | 1070.467<br>1070.363 (38)                      | 1053.440               | 972.481<br>972.442 (6)         | 1052.456<br>1052.293 (2)      |
| E  | 12    | 1199.509<br>1199.415 (100)                     | 1182.483               | 1101.523<br>1101.446 (12)      | 1181.499<br>1181.420 (5)      |
| S  | 13    | 1286.541<br>1286.476 (23)                      | 1269.515               | 1188.555<br>1188.159 (2)       | 1268.531<br>1268.272 (15)     |
| C  | 14    | 1446.572<br>1446.410 (7)                       | 1429.545               | 1348.586<br>1348.613 (3)       | 1428.561                      |
| A  | 15    | 1517.609<br>*759.240 [2+] (62)<br>1517.209 (2) | 1500.583               | 1419.623<br>*710.221 [2+] (54) | 1499.599<br>750.255 [2+] (54) |
| S  | 16    | 1604.641<br>802.761 [2+] (59)                  | 1587.615               | 1506.655<br>753.682 [2+] (34)  | 1586.631<br>793.655 [2+] (90) |
| L  | 17    | -                                              | -                      | -                              | -                             |

### C-terminal ions

| AA | C-ion | y                             | y*       | y-98                     | yo                       |
|----|-------|-------------------------------|----------|--------------------------|--------------------------|
| G  | 17    | -                             | -        | -                        | -                        |
| S  | 16    | 1678.714                      | 1661.688 | 1580.728                 | 1660.704                 |
| V  | 15    | 1591.682                      | 1574.656 | 1493.696                 | 1573.672                 |
| A  | 14    | 1492.614<br>746.661 [2+] (22) | 1475.587 | 1394.628                 | 1474.603                 |
| S  | 13    | 1421.577<br>1421.399 (15)     | 1404.550 | 1323.591<br>1323.547 (7) | 1403.566                 |
| V  | 12    | 1334.545<br>1334.462 (8)      | 1317.518 | 1236.559<br>1236.468 (2) | 1316.534                 |
| H  | 11    | 1235.476<br>1235.396 (17)     | 1218.450 | 1137.490                 | 1217.466                 |
| s  | 10    | 1098.417<br>1098.200 (11)     | 1081.391 | 1000.431                 | 1080.407<br>1080.374 (5) |
| P  | 9     | 931.419<br>931.298 (41)       | 914.392  | -                        | 913.408<br>913.513 (6)   |
| P  | 8     | 834.366                       | 817.340  | -                        | 816.356                  |
| A  | 7     | 737.314                       | 720.287  | -                        | 719.303                  |
| E  | 6     | 666.276<br>666.003 (27)       | 649.250  | -                        | 648.266<br>648.214 (5)   |

|   |   |                         |         |   |                         |
|---|---|-------------------------|---------|---|-------------------------|
| S | 5 | 537.234<br>537.107 (26) | 520.207 | - | 519.223<br>519.263 (7)  |
| C | 4 | 450.202<br>450.206 (6)  | 433.175 | - | 432.191<br>*432.155 (3) |
| A | 3 | 290.171                 | 273.145 | - | 272.161                 |
| S | 2 | 219.134                 | 202.107 | - | 201.123                 |
| L | 1 | 132.102                 | 115.075 | - | 114.091                 |

### Ion distribution

| Threshold | Ion count | Matches | % matched |
|-----------|-----------|---------|-----------|
| 0         | 82        | 49      | 59        |
| 0.5       | 79        | 48      | 60        |
| 1         | 71        | 47      | 66        |
| 2         | 62        | 42      | 67        |
| 3         | 52        | 37      | 71        |
| 4         | 42        | 33      | 78        |
| 5         | 39        | 33      | 84        |
| 10        | 25        | 22      | 88        |

### Observed ions > 1%

| m/z     | Intensity           | % max | Assignment (delta)                                |
|---------|---------------------|-------|---------------------------------------------------|
| 272.220 | 36.07 <sub>3</sub>  | 1.70  | y3o (0.05)                                        |
| 297.022 | 24.96 <sub>3</sub>  | 1.17  | a7o[2+] (0.35) : a7*[2+]<br>(-0.13) : b4o (-0.13) |
| 315.022 | 66.60 <sub>3</sub>  | 3.14  | b4 (-0.14)                                        |
| 319.054 | 140.14 <sub>3</sub> | 6.60  |                                                   |
| 352.302 | 35.91 <sub>3</sub>  | 1.69  |                                                   |
| 388.063 | 65.36 <sub>3</sub>  | 3.08  |                                                   |
| 406.025 | 67.51 <sub>3</sub>  | 3.18  |                                                   |
| 429.921 | 54.96 <sub>3</sub>  | 2.59  |                                                   |
| 432.155 | 79.86 <sub>3</sub>  | 3.76  | x8[2+] (0.47) : y4o (-0.03)                       |
| 444.015 | 39.93 <sub>3</sub>  | 1.88  |                                                   |
| 448.210 | 88.73 <sub>3</sub>  | 4.18  |                                                   |
| 450.206 | 129.94 <sub>3</sub> | 6.12  | y4 (0.00)                                         |
| 499.001 | 91.13 <sub>3</sub>  | 4.29  |                                                   |
| 516.976 | 79.32 <sub>3</sub>  | 3.74  |                                                   |
| 519.263 | 161.22 <sub>3</sub> | 7.60  | y5o (0.03)                                        |
| 537.107 | 563.05 <sub>3</sub> | 26.55 | y5 (-0.12)                                        |
| 612.938 | 93.79 <sub>3</sub>  | 4.42  |                                                   |
| 620.167 | 80.54 <sub>3</sub>  | 3.79  | b7o (-0.14)                                       |
| 638.196 | 235.77 <sub>3</sub> | 11.11 | b7 (-0.13)                                        |
| 639.122 | 76.01 <sub>3</sub>  | 3.58  |                                                   |
| 647.316 | 82.83 <sub>3</sub>  | 3.90  |                                                   |
| 648.214 | 108.29 <sub>3</sub> | 5.10  | y6o (-0.05)                                       |

|          |                      |       |                                     |
|----------|----------------------|-------|-------------------------------------|
| 666.003  | 589.83 <sub>3</sub>  | 27.81 | y6 (-0.27)                          |
| 701.352  | 886.00 <sub>3</sub>  | 41.78 | a14*[2+] (0.07)                     |
| 710.221  | 1161.60 <sub>3</sub> | 54.78 | a14[2+] (0.42) : b15-98[2+] (-0.09) |
| 744.859  | 922.30 <sub>3</sub>  | 43.49 | a15[2+] (-0.45)                     |
| 746.661  | 479.32 <sub>3</sub>  | 22.60 | y14[2+] (-0.15)                     |
| 750.255  | 1151.12 <sub>3</sub> | 54.28 | b15o[2+] (-0.04)                    |
| 753.682  | 731.96 <sub>3</sub>  | 34.52 | b16-98[2+] (-0.14)                  |
| 756.248  | 783.67 <sub>3</sub>  | 36.95 |                                     |
| 759.240  | 1333.39 <sub>3</sub> | 62.88 | b15[2+] (-0.06) : a8o (-0.07)       |
| 793.655  | 1921.81 <sub>3</sub> | 90.63 | b16o[2+] (-0.16)                    |
| 802.761  | 1254.18 <sub>3</sub> | 59.14 | b16[2+] (-0.06)                     |
| 805.019  | 974.87 <sub>3</sub>  | 45.97 | b8 (-0.30)                          |
| 858.602  | 760.83 <sub>3</sub>  | 35.88 |                                     |
| 859.365  | 1784.99 <sub>3</sub> | 84.18 |                                     |
| 885.266  | 120.94 <sub>3</sub>  | 5.70  | b9* (-0.08)                         |
| 913.513  | 138.70 <sub>3</sub>  | 6.54  | y9o (0.10)                          |
| 931.298  | 880.76 <sub>3</sub>  | 41.53 | y9 (-0.12)                          |
| 932.540  | 77.57 <sub>3</sub>   | 3.65  |                                     |
| 956.248  | 60.64 <sub>3</sub>   | 2.85  |                                     |
| 972.442  | 133.55 <sub>3</sub>  | 6.29  | b11-98 (-0.03)                      |
| 990.379  | 41.29 <sub>3</sub>   | 1.94  |                                     |
| 999.481  | 43.54 <sub>3</sub>   | 2.05  | b10 (0.05)                          |
| 1043.836 | 56.06 <sub>3</sub>   | 2.64  |                                     |
| 1052.293 | 52.58 <sub>3</sub>   | 2.47  | b11o (-0.16)                        |
| 1070.363 | 808.03 <sub>3</sub>  | 38.10 | b11 (-0.10)                         |
| 1080.374 | 107.79 <sub>3</sub>  | 5.08  | y10o (-0.03)                        |
| 1098.200 | 244.80 <sub>3</sub>  | 11.54 | y10 (-0.21)                         |
| 1101.446 | 258.14 <sub>3</sub>  | 12.17 | b12-98 (-0.07)                      |
| 1119.095 | 56.32 <sub>3</sub>   | 2.65  |                                     |
| 1138.806 | 45.09 <sub>3</sub>   | 2.12  |                                     |
| 1181.420 | 115.16 <sub>3</sub>  | 5.43  | b12o (-0.07)                        |
| 1188.159 | 57.09 <sub>3</sub>   | 2.69  | b13-98 (-0.39)                      |
| 1199.415 | 2120.36 <sub>3</sub> | 100   | b12 (-0.09)                         |
| 1200.519 | 149.58 <sub>3</sub>  | 7.05  |                                     |
| 1235.396 | 371.77 <sub>3</sub>  | 17.53 | y11 (-0.08)                         |
| 1236.468 | 51.95 <sub>3</sub>   | 2.45  | y12-98 (-0.09)                      |
| 1268.272 | 322.28 <sub>3</sub>  | 15.19 | b13o (-0.25)                        |
| 1286.476 | 488.97 <sub>3</sub>  | 23.06 | b13 (-0.06)                         |
| 1323.547 | 158.90 <sub>3</sub>  | 7.49  | y13-98 (-0.04)                      |
| 1325.756 | 133.30 <sub>3</sub>  | 6.28  |                                     |
| 1334.462 | 170.57 <sub>3</sub>  | 8.04  | y12 (-0.08)                         |
| 1348.613 | 68.94 <sub>3</sub>   | 3.25  | b14-98 (0.02)                       |

|          |                     |       |               |
|----------|---------------------|-------|---------------|
| 1365.516 | 36.73 <sub>,</sub>  | 1.73  |               |
| 1401.646 | 25.41 <sub>,</sub>  | 1.19  | a14* (0.09)   |
| 1418.955 | 26.21 <sub>,</sub>  | 1.23  | a14 (0.37)    |
| 1419.642 | 32.95 <sub>,</sub>  | 1.55  | b15-98 (0.01) |
| 1421.399 | 332.17 <sub>,</sub> | 15.66 | y13 (-0.17)   |
| 1446.410 | 156.28 <sub>,</sub> | 7.37  | b14 (-0.16)   |
| 1517.209 | 53.04 <sub>,</sub>  | 2.50  | b15 (-0.40)   |

S1987



# ProPhosSI MS/MS report

Mass: 625.792499 Charge: 2+

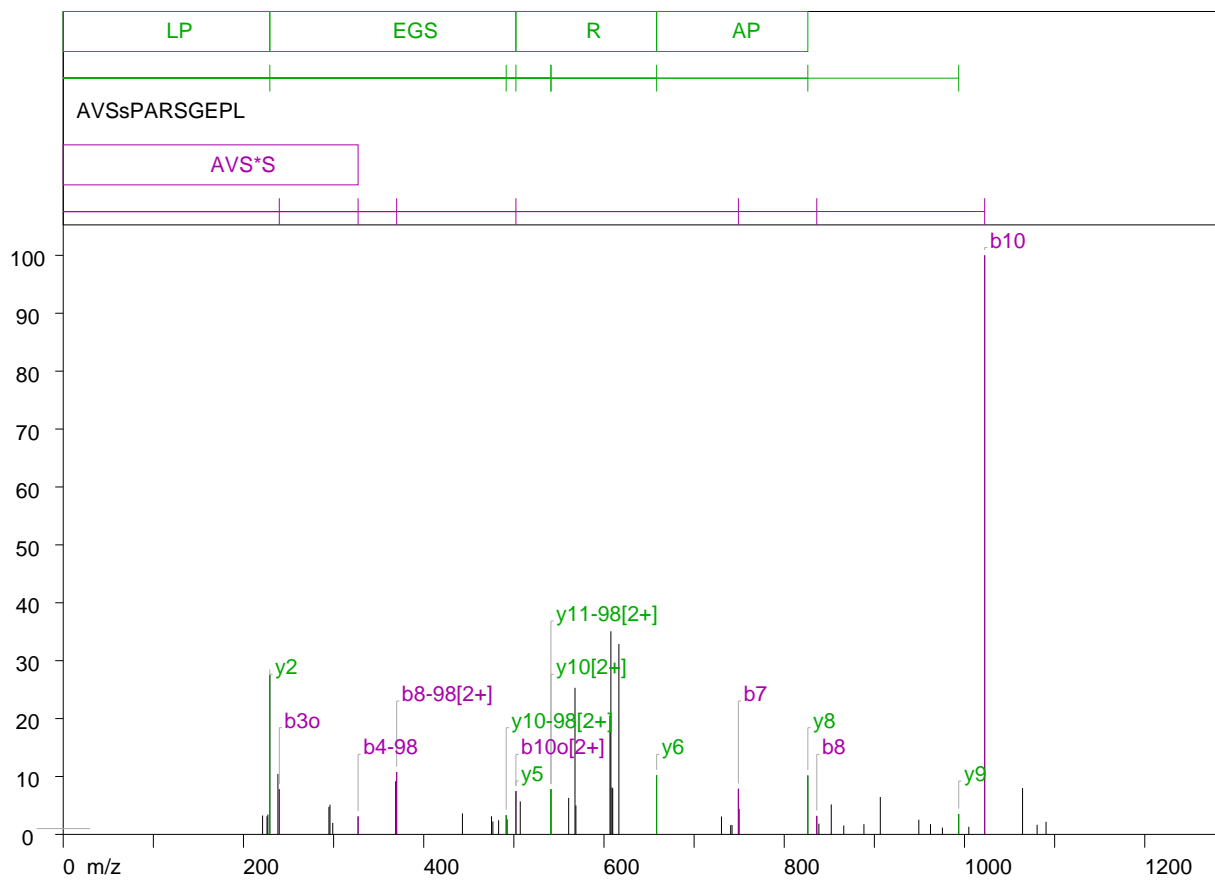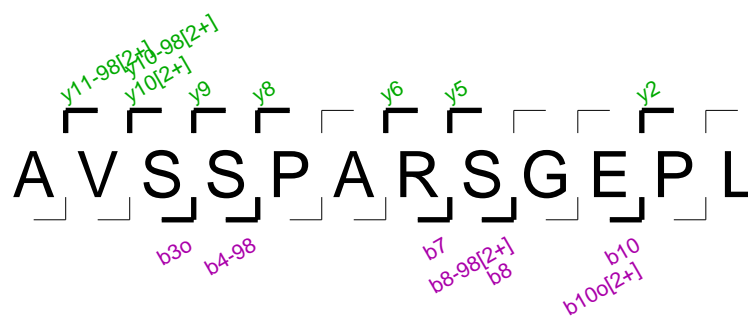

## Cav3.2 human

(42) 1984 AVSSPARSGEPL 1995 1249.570 (-0.0010) Da

|                         |     |
|-------------------------|-----|
| Parent Ion              | m/z |
| No parent ions observed |     |

## Modifications and supporting evidence

| Position | Residue ID | Modification | Evidence |
|----------|------------|--------------|----------|
| 4        | (1987)     | Phospho (ST) | y9       |

## Spectrum interpretation

| Rule                                   | passed/tests | Description                                                                                                                                                                                                                                                                                                                                                                                                                                                                                                                                                                                                                  |
|----------------------------------------|--------------|------------------------------------------------------------------------------------------------------------------------------------------------------------------------------------------------------------------------------------------------------------------------------------------------------------------------------------------------------------------------------------------------------------------------------------------------------------------------------------------------------------------------------------------------------------------------------------------------------------------------------|
| Parent ions present                    | 0/1          | Parent ions corresponding to the parent fragment - 1 phosphate ions were not found                                                                                                                                                                                                                                                                                                                                                                                                                                                                                                                                           |
| Three -98 Ions present                 | 1/1          | 4 des-phospho fragment ions were found.                                                                                                                                                                                                                                                                                                                                                                                                                                                                                                                                                                                      |
| Unique -98 transitions present         | 0/1          | No transitions found to support unique phosphorylation at position 4<br><br/>                                                                                                                                                                                                                                                                                                                                                                                                                                                                                                                                                |
| Four Sequential b or y ions            | 0/1          | Sequence of four y or b ions not observed                                                                                                                                                                                                                                                                                                                                                                                                                                                                                                                                                                                    |
| Five of six sequential ions present    | 0/1          |                                                                                                                                                                                                                                                                                                                                                                                                                                                                                                                                                                                                                              |
| Proline directed fragmentation pattern | 3/3          | NOTE: S-P is a low abundance fragmentation.<br>PASS: y8> y7<br/><br>PASS: b5-98< b4-98<br/><br>PASS: y2> y1<br/><br>No proline ions at b11-98<br/>                                                                                                                                                                                                                                                                                                                                                                                                                                                                           |
| PhosphoTyrosine transition present     | 0/0          | 0 of 0 phosphotyrosine transitions were found.                                                                                                                                                                                                                                                                                                                                                                                                                                                                                                                                                                               |
| Six of top ten ions identified         | 6/6          | ion 1 (mass: 1022.395: intensity: 901.03) assigned 1 times<br>ion 2 (mass: 607.662: intensity: 316.03) assigned 0 times<br>ion 3 (mass: 616.546: intensity: 296.17) assigned 0 times<br>ion 4 (mass: 229.234: intensity: 248.45) assigned 1 times<br>ion 5 (mass: 567.808: intensity: 228.09) assigned 0 times<br>ion 6 (mass: 606.675: intensity: 184.52) assigned 0 times<br>ion 7 (mass: 369.963: intensity: 96.93) assigned 1 times<br>ion 8 (mass: 238.198: intensity: 94.09) assigned 1 times<br>ion 9 (mass: 658.407: intensity: 92.09) assigned 1 times<br>ion 10 (mass: 826.190: intensity: 91.76) assigned 1 times |

## Ion Table

18 ions assigned of 41 ions above threshold (43%).

### N-terminal ions

| AA | N-ion | b       | b*      | b-98 | bo      |
|----|-------|---------|---------|------|---------|
| A  | 1     | 72.044  | 55.018  | -    | 54.034  |
| V  | 2     | 171.113 | 154.086 | -    | 153.102 |

|   |    |                            |          |                              |                               |
|---|----|----------------------------|----------|------------------------------|-------------------------------|
| S | 3  | 258.145                    | 241.118  | -                            | 240.134<br>239.736 (7)        |
| s | 4  | 425.143                    | 408.117  | 327.157<br>327.149 (3)       | 407.133                       |
| P | 5  | 522.196                    | 505.169  | 424.210                      | 504.185                       |
| A | 6  | 593.233                    | 576.207  | 495.247                      | 575.223                       |
| R | 7  | 749.334<br>749.102 (7)     | 732.308  | 651.348                      | 731.324                       |
| S | 8  | 836.366<br>836.095 (3)     | 819.340  | 738.380<br>369.963 [2+] (10) | 818.356                       |
| G | 9  | 893.388                    | 876.361  | 795.402                      | 875.377                       |
| E | 10 | 1022.430<br>1022.395 (100) | 1005.404 | 924.444                      | 1004.420<br>*502.267 [2+] (7) |
| P | 11 | 1119.483                   | 1102.457 | 1021.497                     | 1101.473                      |
| L | 12 | -                          | -        | -                            | -                             |

### C-terminal ions

| AA | C-ion | y                             | y*       | y-98                          | yo       |
|----|-------|-------------------------------|----------|-------------------------------|----------|
| A  | 12    | -                             | -        | -                             | -        |
| V  | 11    | 1179.541                      | 1162.514 | 1081.555<br>*541.152 [2+] (7) | 1161.530 |
| S  | 10    | 1080.472<br>*541.152 [2+] (7) | 1063.446 | 982.486<br>491.493 [2+] (3)   | 1062.462 |
| s  | 9     | 993.440<br>993.574 (3)        | 976.414  | 895.454                       | 975.430  |
| P  | 8     | 826.442<br>826.190 (10)       | 809.415  | -                             | 808.431  |
| A  | 7     | 729.389                       | 712.363  | -                             | 711.379  |
| R  | 6     | 658.352<br>658.407 (10)       | 641.325  | -                             | 640.341  |
| S  | 5     | 502.251<br>*502.267 (7)       | 485.224  | -                             | 484.240  |
| G  | 4     | 415.219                       | 398.192  | -                             | 397.208  |
| E  | 3     | 358.197                       | 341.171  | -                             | 340.187  |
| P  | 2     | 229.155<br>229.234 (27)       | 212.128  | -                             | 211.144  |
| L  | 1     | 132.102                       | 115.075  | -                             | 114.091  |

### Ion distribution

| Threshold | Ion count | Matches | % matched |
|-----------|-----------|---------|-----------|
| 0         | 52        | 21      | 40        |
| 0.5       | 52        | 21      | 40        |
| 1         | 51        | 21      | 41        |
| 2         | 41        | 18      | 43        |
| 3         | 36        | 17      | 47        |
| 4         | 26        | 11      | 42        |
| 5         | 23        | 10      | 43        |
| 10        | 10        | 6       | 60        |

Observed ions > 1%

| m/z     | Intensity           | % max | Assignment (delta)                  |
|---------|---------------------|-------|-------------------------------------|
| 221.183 | 29.32 <sub>3</sub>  | 3.25  | c4[2+] (-0.40)                      |
| 226.089 | 28.13 <sub>3</sub>  | 3.12  |                                     |
| 227.071 | 31.02 <sub>3</sub>  | 3.44  |                                     |
| 229.234 | 248.45 <sub>3</sub> | 27.57 | y2 (0.07)                           |
| 238.198 | 94.09 <sub>3</sub>  | 10.44 | a5o[2+] (-0.40)                     |
| 239.736 | 70.19 <sub>3</sub>  | 7.78  | b3o (-0.39)                         |
| 294.822 | 42.76 <sub>3</sub>  | 4.74  |                                     |
| 295.975 | 46.22 <sub>3</sub>  | 5.12  |                                     |
| 299.042 | 17.93 <sub>3</sub>  | 1.98  |                                     |
| 327.149 | 27.99 <sub>3</sub>  | 3.10  | b4-98 (-0.00)                       |
| 368.885 | 82.74 <sub>3</sub>  | 9.18  |                                     |
| 369.963 | 96.93 <sub>3</sub>  | 10.75 | b8-98[2+] (0.26)                    |
| 442.927 | 32.60 <sub>3</sub>  | 3.61  | x4 (-0.28)                          |
| 475.215 | 28.22 <sub>3</sub>  | 3.13  |                                     |
| 476.741 | 20.08 <sub>3</sub>  | 2.22  | a5* (-0.43)                         |
| 483.089 | 21.98 <sub>3</sub>  | 2.43  |                                     |
| 491.493 | 30.01 <sub>3</sub>  | 3.33  | y10-98[2+] (-0.25)                  |
| 492.505 | 23.53 <sub>3</sub>  | 2.61  |                                     |
| 502.267 | 67.44 <sub>3</sub>  | 7.48  | y5 (0.01) : b10o[2+] (-0.44)        |
| 507.095 | 51.35 <sub>3</sub>  | 5.69  |                                     |
| 541.152 | 70.34 <sub>3</sub>  | 7.80  | y10[2+] (0.41) : y11-98[2+] (-0.12) |
| 560.820 | 56.83 <sub>3</sub>  | 6.30  |                                     |
| 567.808 | 228.09 <sub>3</sub> | 25.31 |                                     |
| 568.831 | 45.01 <sub>3</sub>  | 4.99  | c11[2+] (0.07)                      |
| 606.675 | 184.52 <sub>3</sub> | 20.47 |                                     |
| 607.662 | 316.03 <sub>3</sub> | 35.07 |                                     |
| 608.870 | 72.99 <sub>3</sub>  | 8.10  |                                     |
| 609.695 | 71.61 <sub>3</sub>  | 7.94  |                                     |
| 616.546 | 296.17 <sub>3</sub> | 32.87 |                                     |
| 658.407 | 92.09 <sub>3</sub>  | 10.22 | y6 (0.05)                           |
| 730.352 | 27.90 <sub>3</sub>  | 3.09  |                                     |
| 740.569 | 14.31 <sub>3</sub>  | 1.58  |                                     |
| 742.063 | 14.74 <sub>3</sub>  | 1.63  |                                     |
| 749.102 | 71.03 <sub>3</sub>  | 7.88  | b7 (-0.23)                          |
| 749.919 | 39.97 <sub>3</sub>  | 4.43  |                                     |
| 826.190 | 91.76 <sub>3</sub>  | 10.18 | y8 (-0.25)                          |
| 836.095 | 28.83 <sub>3</sub>  | 3.19  | b8 (-0.27)                          |
| 838.429 | 16.73 <sub>3</sub>  | 1.85  |                                     |
| 852.171 | 46.64 <sub>3</sub>  | 5.17  |                                     |
| 866.032 | 13.88 <sub>3</sub>  | 1.54  |                                     |
| 888.428 | 15.89 <sub>3</sub>  | 1.76  |                                     |

|          |         |      |             |
|----------|---------|------|-------------|
| 906.578  | 58.18,  | 6.45 |             |
| 949.319  | 22.80,  | 2.53 |             |
| 962.296  | 15.84,  | 1.75 |             |
| 975.484  | 10.56,  | 1.17 | y9o (0.05)  |
| 993.574  | 31.64,  | 3.51 | y9 (0.13)   |
| 1004.767 | 11.79,  | 1.30 | b10o (0.34) |
| 1022.395 | 901.03, | 100  | b10 (-0.03) |
| 1064.403 | 72.01,  | 7.99 |             |
| 1080.575 | 14.90,  | 1.65 | y10 (0.10)  |
| 1090.489 | 19.57   | 2.17 |             |

S1999

# ProPhosSI MS/MS report

Mass: 622.294496 Charge: 2+

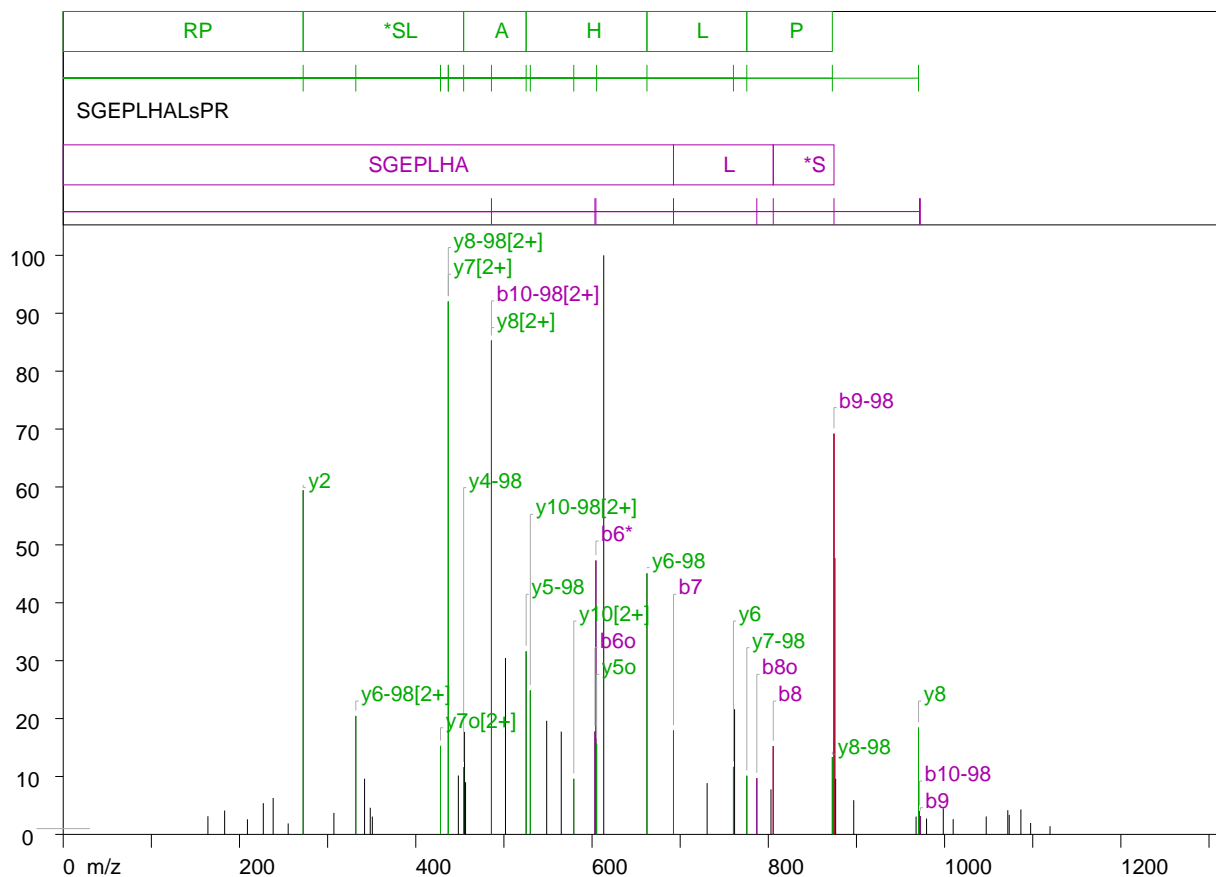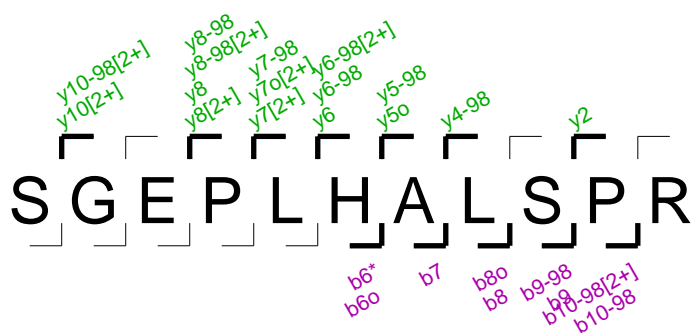

## Cav3.2 human

(31) 1991 SGEPLHALsPR 2001 1242.575 (-0.0024) Da

|                         |     |
|-------------------------|-----|
| Parent Ion              | m/z |
| No parent ions observed |     |

## Modifications and supporting evidence

| Position | Residue ID | Modification | Evidence              |
|----------|------------|--------------|-----------------------|
| 9        | (1999)     | Phospho (ST) | b8 => b9-98;y2=>y5-98 |

## Spectrum interpretation

| Rule                                   | passed/tests | Description                                                                                                                                                                                                                                                                                                                                                                                                                                                                                                                                                                                                                   |
|----------------------------------------|--------------|-------------------------------------------------------------------------------------------------------------------------------------------------------------------------------------------------------------------------------------------------------------------------------------------------------------------------------------------------------------------------------------------------------------------------------------------------------------------------------------------------------------------------------------------------------------------------------------------------------------------------------|
| Parent ions present                    | 0/1          | Parent ions corresponding to the parent fragment - 1 phosphate ions were not found                                                                                                                                                                                                                                                                                                                                                                                                                                                                                                                                            |
| Three -98 Ions present                 | 1/1          | 8 des-phospho fragment ions were found.                                                                                                                                                                                                                                                                                                                                                                                                                                                                                                                                                                                       |
| Unique -98 transitions present         | 1/1          | transition b8 to b9-98,transition y2 to y5-98 support unique phosphorylation at position 9<br><br/>                                                                                                                                                                                                                                                                                                                                                                                                                                                                                                                           |
| Four Sequential b or y ions            | 1/1          | Sequence of four b ions found from b7 to b10-98.<br>Sequence of four y ions found from y4-98 to y7-98.                                                                                                                                                                                                                                                                                                                                                                                                                                                                                                                        |
| Five of six sequential ions present    | 1/1          | Five of Six ions found between y2 and y7<br>Five of Six ions found between y3 and y8<br>Five of Six ions found between y4 and y9<br>Five of Six ions found between y5 and y10                                                                                                                                                                                                                                                                                                                                                                                                                                                 |
| Proline directed fragmentation pattern | 2/3          | PASS: y8-98> y7-98 with ratio 9.08<br/><br>No proline ions at b4<br/><br>NOTE: S-P is a low abundance fragmentation.<br>PASS: y2> y1<br/><br>FAIL: b10-98> b9-98<br/>                                                                                                                                                                                                                                                                                                                                                                                                                                                         |
| PhosphoTyrosine transition present     | 0/0          | 0 of 0 phosphotyrosine transitions were found.                                                                                                                                                                                                                                                                                                                                                                                                                                                                                                                                                                                |
| Six of top ten ions identified         | 7/6          | ion 1 (mass: 613.269: intensity: 266.73) assigned 0 times<br>ion 2 (mass: 436.921: intensity: 245.49) assigned 2 times<br>ion 3 (mass: 485.867: intensity: 227.47) assigned 2 times<br>ion 4 (mass: 874.484: intensity: 184.57) assigned 1 times<br>ion 5 (mass: 272.229: intensity: 158.53) assigned 1 times<br>ion 6 (mass: 875.539: intensity: 127.30) assigned 0 times<br>ion 7 (mass: 604.360: intensity: 126.19) assigned 1 times<br>ion 8 (mass: 662.305: intensity: 120.27) assigned 1 times<br>ion 9 (mass: 525.242: intensity: 84.35) assigned 1 times<br>ion 10 (mass: 501.789: intensity: 81.27) assigned 0 times |



## Ion Table

26 ions assigned of 53 ions above threshold (49%).

### N-terminal ions

| AA | N-ion | b                       | b*                      | b-98                                         | bo                      |
|----|-------|-------------------------|-------------------------|----------------------------------------------|-------------------------|
| S  | 1     | 88.039                  | 71.013                  | -                                            | 70.029                  |
| G  | 2     | 145.061                 | 128.034                 | -                                            | 127.050                 |
| E  | 3     | 274.103                 | 257.077                 | -                                            | 256.093                 |
| P  | 4     | 371.156                 | 354.130                 | -                                            | 353.146                 |
| L  | 5     | 484.240                 | 467.214                 | -                                            | 466.230                 |
| H  | 6     | 621.299                 | 604.273<br>604.360 (47) | -                                            | 603.289<br>603.289 (17) |
| A  | 7     | 692.336<br>692.411 (17) | 675.310                 | -                                            | 674.326                 |
| L  | 8     | 805.420<br>805.628 (15) | 788.394                 | -                                            | 787.410<br>786.932 (9)  |
| s  | 9     | 972.419<br>972.449 (3)  | 955.392                 | 874.433<br>874.484 (69)                      | 954.408                 |
| P  | 10    | 1069.471                | 1052.445                | 971.486<br>*485.867 [2+] (85)<br>971.533 (4) | 1051.461                |
| R  | 11    | -                       | -                       | -                                            | -                       |

### C-terminal ions

| AA | C-ion | y                                             | y*       | y-98                                          | yo                           |
|----|-------|-----------------------------------------------|----------|-----------------------------------------------|------------------------------|
| S  | 11    | -                                             | -        | -                                             | -                            |
| G  | 10    | 1156.551<br>579.244 [2+] (9)                  | 1139.525 | 1058.565<br>529.972 [2+] (24)                 | 1138.541                     |
| E  | 9     | 1099.530                                      | 1082.503 | 1001.544                                      | 1081.519                     |
| P  | 8     | 970.487<br>*485.867 [2+] (85)<br>970.419 (18) | 953.461  | 872.501<br>*436.921 [2+] (92)<br>872.639 (13) | 952.476                      |
| L  | 7     | 873.434<br>*436.921 [2+] (92)                 | 856.408  | 775.448<br>775.576 (10)                       | 855.424<br>428.068 [2+] (15) |
| H  | 6     | 760.350<br>*760.423 (11)                      | 743.324  | 662.364<br>662.305 (45)<br>331.960 [2+] (20)  | 742.340                      |
| A  | 5     | 623.291                                       | 606.265  | 525.305<br>525.242 (31)                       | 605.281<br>605.179 (15)      |
| L  | 4     | 552.254                                       | 535.228  | 454.268<br>454.285 (11)                       | 534.244                      |
| s  | 3     | 439.170                                       | 422.144  | 341.184                                       | 421.160                      |
| P  | 2     | 272.172<br>272.229 (59)                       | 255.145  | -                                             | 254.161                      |
| R  | 1     | 175.119                                       | 158.092  | -                                             | 157.108                      |

## Ion distribution

| Threshold | Ion count | Matches | % matched |
|-----------|-----------|---------|-----------|
| 0         | 56        | 27      | 48        |
| 0.5       | 56        | 27      | 48        |
| 1         | 56        | 27      | 48        |
| 2         | 53        | 26      | 49        |
| 3         | 50        | 26      | 52        |

|    |    |    |    |
|----|----|----|----|
| 4  | 43 | 25 | 58 |
| 5  | 37 | 22 | 59 |
| 10 | 27 | 19 | 70 |

### Observed ions > 1%

| m/z     | Intensity           | % max | Assignment (delta)                 |
|---------|---------------------|-------|------------------------------------|
| 164.167 | 8.38 <sub>,</sub>   | 3.14  |                                    |
| 183.139 | 10.99 <sub>,</sub>  | 4.12  |                                    |
| 208.988 | 6.93 <sub>,</sub>   | 2.59  |                                    |
| 226.995 | 14.39 <sub>,</sub>  | 5.39  |                                    |
| 238.190 | 16.77 <sub>,</sub>  | 6.28  |                                    |
| 255.230 | 5.04 <sub>,</sub>   | 1.88  | z2 (0.08) : y2* (0.08)             |
| 272.229 | 158.53 <sub>,</sub> | 59.43 | y2 (0.05)                          |
| 307.112 | 9.89 <sub>,</sub>   | 3.70  |                                    |
| 331.960 | 54.59 <sub>,</sub>  | 20.46 | y6-98[2+] (0.27)                   |
| 341.898 | 25.65 <sub>,</sub>  | 9.61  |                                    |
| 348.337 | 12.27 <sub>,</sub>  | 4.60  |                                    |
| 350.706 | 8.21 <sub>,</sub>   | 3.07  |                                    |
| 428.068 | 40.77 <sub>,</sub>  | 15.28 | y7o[2+] (-0.14)                    |
| 436.921 | 245.49 <sub>,</sub> | 92.03 | y8-98[2+] (0.16) : y7[2+] (-0.30)  |
| 448.305 | 27.13 <sub>,</sub>  | 10.17 |                                    |
| 454.285 | 30.90 <sub>,</sub>  | 11.58 | y4-98 (0.01)                       |
| 455.338 | 47.22 <sub>,</sub>  | 17.70 |                                    |
| 456.490 | 24.03 <sub>,</sub>  | 9.00  | a5 (0.24)                          |
| 485.867 | 227.47 <sub>,</sub> | 85.28 | y8[2+] (0.11) : b10-98[2+] (-0.37) |
| 501.789 | 81.27 <sub>,</sub>  | 30.46 |                                    |
| 525.242 | 84.35 <sub>,</sub>  | 31.62 | y5-98 (-0.06)                      |
| 529.972 | 66.33 <sub>,</sub>  | 24.86 | y10-98[2+] (0.18)                  |
| 548.550 | 52.34 <sub>,</sub>  | 19.62 |                                    |
| 565.054 | 47.35 <sub>,</sub>  | 17.75 |                                    |
| 579.244 | 25.61 <sub>,</sub>  | 9.60  | y10[2+] (0.46)                     |
| 603.289 | 47.43 <sub>,</sub>  | 17.78 | b6o (-0.00)                        |
| 604.360 | 126.19 <sub>,</sub> | 47.31 | b6* (0.08)                         |
| 605.179 | 41.77 <sub>,</sub>  | 15.66 | y5o (-0.10)                        |
| 613.269 | 266.73 <sub>,</sub> | 100   |                                    |
| 662.305 | 120.27 <sub>,</sub> | 45.09 | y6-98 (-0.05)                      |
| 692.411 | 47.84 <sub>,</sub>  | 17.93 | b7 (0.07)                          |
| 730.556 | 23.63 <sub>,</sub>  | 8.85  |                                    |
| 760.423 | 31.11 <sub>,</sub>  | 11.66 | y6 (0.07) : a8* (0.02)             |
| 761.718 | 57.67 <sub>,</sub>  | 21.62 |                                    |
| 775.576 | 27.02 <sub>,</sub>  | 10.13 | y7-98 (0.12)                       |

|          |                     |       |               |
|----------|---------------------|-------|---------------|
| 786.932  | 25.93 <sub>,</sub>  | 9.72  | b8o (-0.47)   |
| 803.001  | 20.74 <sub>,</sub>  | 7.77  |               |
| 805.628  | 40.64 <sub>,</sub>  | 15.23 | b8 (0.20)     |
| 872.639  | 35.65 <sub>,</sub>  | 13.36 | y8-98 (0.13)  |
| 874.484  | 184.57 <sub>,</sub> | 69.19 | b9-98 (0.05)  |
| 875.539  | 127.30 <sub>,</sub> | 47.72 |               |
| 876.400  | 25.57 <sub>,</sub>  | 9.58  |               |
| 896.904  | 15.76 <sub>,</sub>  | 5.90  |               |
| 967.642  | 8.21 <sub>,</sub>   | 3.07  |               |
| 970.419  | 49.20 <sub>,</sub>  | 18.44 | y8 (-0.06)    |
| 971.533  | 10.79 <sub>,</sub>  | 4.04  | b10-98 (0.04) |
| 972.449  | 8.47 <sub>,</sub>   | 3.17  | b9 (0.02)     |
| 979.534  | 7.33 <sub>,</sub>   | 2.74  |               |
| 998.523  | 12.01 <sub>,</sub>  | 4.50  | x8 (0.04)     |
| 1009.743 | 7.03 <sub>,</sub>   | 2.63  |               |
| 1047.228 | 8.27 <sub>,</sub>   | 3.10  |               |
| 1071.728 | 11.13 <sub>,</sub>  | 4.17  |               |
| 1073.310 | 8.97 <sub>,</sub>   | 3.36  |               |
| 1086.568 | 11.52 <sub>,</sub>  | 4.31  | c10 (0.06)    |
| 1097.614 | 5.26 <sub>,</sub>   | 1.97  |               |
| 1119.633 | 3.77                | 1.41  |               |

S2057



## Cav3.2 human

(62) 2044 TPVRPVTQGGSLQsPPR 2060 1855.930 (-0.0029) Da

|                         |     |
|-------------------------|-----|
| Parent Ion              | m/z |
| No parent ions observed |     |

## Modifications and supporting evidence

| Position | Residue ID | Modification | Evidence              |
|----------|------------|--------------|-----------------------|
| 14       | (2057)     | Phospho (ST) | b13[2+] => b14-98[2+] |

## Spectrum interpretation

| Rule                                   | passed/tests | Description                                                                                                                                                                                                                                                                                                                                                                                                                                                                                                                                                                                                                                 |
|----------------------------------------|--------------|---------------------------------------------------------------------------------------------------------------------------------------------------------------------------------------------------------------------------------------------------------------------------------------------------------------------------------------------------------------------------------------------------------------------------------------------------------------------------------------------------------------------------------------------------------------------------------------------------------------------------------------------|
| Parent ions present                    | 0/1          | Parent ions corresponding to the parent fragment - 1 phosphate ions were not found                                                                                                                                                                                                                                                                                                                                                                                                                                                                                                                                                          |
| Three -98 Ions present                 | 1/1          | 4 des-phospho fragment ions were found.                                                                                                                                                                                                                                                                                                                                                                                                                                                                                                                                                                                                     |
| Unique -98 transitions present         | 1/1          | transition b13[2+] to b14-98[2+] support unique phosphorylation at position 14<br><br/>                                                                                                                                                                                                                                                                                                                                                                                                                                                                                                                                                     |
| Four Sequential b or y ions            | 1/1          | Sequence of four b ions found from b7 to b10.                                                                                                                                                                                                                                                                                                                                                                                                                                                                                                                                                                                               |
| Five of six sequential ions present    | 1/1          | Five of Six ions found between b6 and b11<br>Five of Six ions found between b7 and b12<br>Five of Six ions found between b8 and b13<br>Five of Six ions found between b9 and b14                                                                                                                                                                                                                                                                                                                                                                                                                                                            |
| Proline directed fragmentation pattern | 3/4          | FAIL: y16-98< y15-98<br/>No proline ions at b2<br/>No proline ions at y13-98<br>PASS: b5< b4<br/>NOTE: S-P is a low abundance fragmentation.<br>PASS: y3> y2<br/>PASS: b15-98< b14-98<br/>NOTE: P-P is a low abundance fragmentation.<br>No proline ions at y2<br>No proline ions at b16-98<br/>                                                                                                                                                                                                                                                                                                                                            |
| PhosphoTyrosine transition present     | 0/0          | 0 of 0 phosphotyrosine transitions were found.                                                                                                                                                                                                                                                                                                                                                                                                                                                                                                                                                                                              |
| Six of top ten ions identified         | 7/6          | ion 1 (mass: 696.034: intensity: 7972.73) assigned 1 times<br>ion 2 (mass: 661.609: intensity: 7369.04) assigned 1 times<br>ion 3 (mass: 369.326: intensity: 7250.47) assigned 1 times<br>ion 4 (mass: 608.250: intensity: 6265.53) assigned 0 times<br>ion 5 (mass: 536.189: intensity: 6225.43) assigned 1 times<br>ion 6 (mass: 1071.371: intensity: 6225.43) assigned 0 times<br>ion 7 (mass: 687.033: intensity: 6055.51) assigned 0 times<br>ion 8 (mass: 540.931: intensity: 5708.79) assigned 1 times<br>ion 9 (mass: 1080.854: intensity: 5708.79) assigned 1 times<br>ion 10 (mass: 664.304: intensity: 5446.07) assigned 1 times |

## Ion Table

51 ions assigned of 83 ions above threshold (61%).

### N-terminal ions

| AA | N-ion | b                                                               | b*                             | b-98                           | bo                                              |
|----|-------|-----------------------------------------------------------------|--------------------------------|--------------------------------|-------------------------------------------------|
| T  | 1     | 102.055                                                         | 85.028                         | -                              | 84.044                                          |
| P  | 2     | 199.108                                                         | 182.081                        | -                              | 181.097                                         |
| V  | 3     | 298.176<br>298.352 (6)                                          | 281.150                        | -                              | 280.166                                         |
| R  | 4     | 454.277<br>*454.304 (23)                                        | 437.251                        | -                              | 436.267                                         |
| P  | 5     | 551.330                                                         | 534.304                        | -                              | 533.320                                         |
| V  | 6     | 650.399                                                         | 633.372                        | -                              | 632.388                                         |
| T  | 7     | 751.446<br>751.559 (30)                                         | 734.420                        | -                              | 733.436                                         |
| Q  | 8     | 879.505<br>879.451 (34)<br>*440.520 [2+] (42)                   | 862.478<br>*431.481 [2+] (28)  | -                              | 861.494<br>*431.481 [2+] (28)                   |
| G  | 9     | 936.526<br>936.875 (25)<br>468.941 [2+] (25)                    | 919.500                        | -                              | 918.516                                         |
| G  | 10    | 993.548<br>993.824 (17)<br>993.571 (11)                         | 976.521                        | -                              | 975.537                                         |
| S  | 11    | 1080.580<br>540.931 [2+] (71)<br>1080.565 (14)<br>1080.854 (71) | 1063.553<br>*531.924 [2+] (42) | -                              | 1062.569<br>1062.840 (42)<br>*531.924 [2+] (42) |
| L  | 12    | 1193.664                                                        | 1176.637                       | -                              | 1175.653                                        |
| Q  | 13    | 1321.722<br>661.609 [2+] (92)                                   | 1304.696<br>*652.585 [2+] (30) | -                              | 1303.712<br>*652.585 [2+] (30)<br>1304.164 (30) |
| s  | 14    | 1488.721                                                        | 1471.694                       | 1390.735<br>696.034 [2+] (100) | 1470.710                                        |
| P  | 15    | 1585.773                                                        | 1568.747                       | 1487.788                       | 1567.763                                        |
| P  | 16    | 1682.826                                                        | 1665.800                       | 1584.840                       | 1664.816                                        |
| R  | 17    | -                                                               | -                              | -                              | -                                               |

### C-terminal ions

| AA | C-ion | y                                                            | y*                             | y-98                                          | yo                                              |
|----|-------|--------------------------------------------------------------|--------------------------------|-----------------------------------------------|-------------------------------------------------|
| T  | 17    | -                                                            | -                              | -                                             | -                                               |
| P  | 16    | 1755.890                                                     | 1738.864                       | 1657.904                                      | 1737.880                                        |
| V  | 15    | 1658.837<br>830.098 [2+] (49)<br>1659.189 (49)               | 1641.811<br>*820.984 [2+] (15) | 1560.852<br>781.176 [2+] (21)                 | 1640.827<br>*820.984 [2+] (15)<br>1640.960 (15) |
| R  | 14    | 1559.769<br>1559.721 (7)                                     | 1542.743<br>*1543.169 (11)     | 1461.783                                      | 1541.759<br>1541.394 (4)                        |
| P  | 13    | 1403.668<br>1403.594 (12)<br>702.300 [2+] (12)               | 1386.641                       | 1305.682                                      | 1385.657                                        |
| V  | 12    | 1306.615                                                     | 1289.589                       | 1208.629                                      | 1288.605                                        |
| T  | 11    | 1207.547<br>1207.759 (29)                                    | 1190.520                       | 1109.561                                      | 1189.536                                        |
| Q  | 10    | 1106.499<br>553.753 [2+] (37)<br>1106.499 (37)               | 1089.473                       | 1008.513                                      | 1088.489                                        |
| G  | 9     | 978.440<br>489.883 [2+] (31)<br>978.356 (29)<br>978.758 (31) | 961.414<br>*480.882 [2+] (24)  | 880.455<br>880.546 (29)<br>*440.520 [2+] (42) | 960.430<br>960.756 (24)<br>*480.882 [2+] (24)   |

|   |   |                                              |         |                         |                        |
|---|---|----------------------------------------------|---------|-------------------------|------------------------|
| G | 8 | 921.419                                      | 904.392 | 823.433                 | 903.408                |
| S | 7 | 864.398<br>864.480 (14)                      | 847.371 | 766.412                 | 846.387                |
| L | 6 | 777.366<br>389.199 [2+] (12)<br>777.409 (25) | 760.339 | 679.380                 | 759.355                |
| Q | 5 | 664.281<br>332.937 [2+] (13)<br>664.304 (68) | 647.255 | 566.296                 | 646.271                |
| s | 4 | 536.223<br>536.189 (78)                      | 519.196 | 438.237<br>438.356 (15) | 518.212                |
| P | 3 | 369.225<br>369.326 (90)                      | 352.198 | -                       | 351.214<br>351.411 (6) |
| P | 2 | 272.172                                      | 255.145 | -                       | 254.161                |
| R | 1 | 175.119                                      | 158.092 | -                       | 157.108                |

### Ion distribution

| Threshold | Ion count | Matches | % matched |
|-----------|-----------|---------|-----------|
| 0         | 90        | 53      | 58        |
| 0.5       | 90        | 53      | 58        |
| 1         | 90        | 53      | 58        |
| 2         | 83        | 51      | 61        |
| 3         | 80        | 51      | 63        |
| 4         | 79        | 51      | 64        |
| 5         | 77        | 50      | 64        |
| 10        | 65        | 46      | 70        |

### Observed ions > 1%

| m/z     | Intensity            | % max | Assignment (delta)                |
|---------|----------------------|-------|-----------------------------------|
| 197.168 | 169.43 <sub>s</sub>  | 2.12  |                                   |
| 199.110 | 130.33 <sub>s</sub>  | 1.63  | b2 (0.00) : x3[2+] (-0.00)        |
| 212.168 | 129.65 <sub>s</sub>  | 1.62  |                                   |
| 230.125 | 219.33 <sub>s</sub>  | 2.75  |                                   |
| 242.293 | 121.97 <sub>s</sub>  | 1.52  |                                   |
| 254.361 | 131.81 <sub>s</sub>  | 1.65  | y2o (0.19)                        |
| 298.352 | 550.42 <sub>s</sub>  | 6.90  | b3 (0.17)                         |
| 332.937 | 1103.41 <sub>s</sub> | 13.83 | y5[2+] (0.29)                     |
| 351.411 | 521.93 <sub>s</sub>  | 6.54  | y3o (0.19)                        |
| 353.247 | 907.77 <sub>s</sub>  | 11.38 | a7o[2+] (0.02) : a7*[2+] (-0.46)  |
| 369.326 | 7250.47 <sub>s</sub> | 90.94 | y3 (0.10)                         |
| 370.295 | 1149.73 <sub>s</sub> | 14.42 |                                   |
| 389.199 | 1030.73 <sub>s</sub> | 12.92 | y6[2+] (0.01)                     |
| 431.481 | 2238.25 <sub>s</sub> | 28.07 | b8o[2+] (0.22) : b8*[2+] (-0.26)  |
| 438.356 | 1246.91 <sub>s</sub> | 15.63 | y4-98 (0.11)                      |
| 440.520 | 3391.99 <sub>s</sub> | 42.54 | b8[2+] (0.26) : y9-98[2+] (-0.21) |



|          |                      |       |                                                      |
|----------|----------------------|-------|------------------------------------------------------|
| 454.304  | 1834.20 <sub>3</sub> | 23.00 | b4 (0.02) : a9[2+] (-0.46)                           |
| 468.941  | 2005.57 <sub>3</sub> | 25.15 | b9[2+] (0.17)                                        |
| 480.882  | 1966.22 <sub>3</sub> | 24.66 | y9o[2+] (0.16) : y9*[2+] (-0.32) : z9[2+] (-0.32)    |
| 489.883  | 2500.58 <sub>3</sub> | 31.36 | y9[2+] (0.15)                                        |
| 531.924  | 3387.23 <sub>3</sub> | 42.48 | b11o[2+] (0.13) : b11*[2+] (-0.35)                   |
| 536.189  | 6225.43 <sub>3</sub> | 78.08 | y4 (-0.03)                                           |
| 540.931  | 5708.79 <sub>3</sub> | 71.60 | b11[2+] (0.13)                                       |
| 553.753  | 2975.43 <sub>3</sub> | 37.32 | y10[2+] (-0.00)                                      |
| 579.628  | 2623.18 <sub>3</sub> | 32.90 |                                                      |
| 607.547  | 3042.84 <sub>3</sub> | 38.16 |                                                      |
| 608.250  | 6265.53 <sub>3</sub> | 78.58 |                                                      |
| 652.585  | 2404.02 <sub>3</sub> | 30.15 | b13o[2+] (0.22) : b13*[2+] (-0.26)                   |
| 661.609  | 7369.04 <sub>3</sub> | 92.42 | b13[2+] (0.24)                                       |
| 664.304  | 5446.07 <sub>3</sub> | 68.30 | y5 (0.02)                                            |
| 687.033  | 6055.51 <sub>3</sub> | 75.95 |                                                      |
| 696.034  | 7972.73 <sub>3</sub> | 100   | b14-98[2+] (0.16)                                    |
| 696.978  | 1557.46 <sub>3</sub> | 19.53 |                                                      |
| 702.300  | 1000.35 <sub>3</sub> | 12.54 | y13[2+] (-0.03)                                      |
| 751.559  | 2406.39 <sub>3</sub> | 30.18 | b7 (0.11)                                            |
| 777.409  | 2038.71 <sub>3</sub> | 25.57 | y6 (0.04)                                            |
| 778.455  | 1297.30 <sub>3</sub> | 16.27 |                                                      |
| 781.176  | 1685.31 <sub>3</sub> | 21.13 | y15-98[2+] (0.24)                                    |
| 820.984  | 1273.47 <sub>3</sub> | 15.97 | y15o[2+] (0.06) : y15*[2+] (-0.42) : z15[2+] (-0.42) |
| 830.098  | 3965.60 <sub>3</sub> | 49.73 | y15[2+] (0.17)                                       |
| 830.972  | 1060.34 <sub>3</sub> | 13.29 |                                                      |
| 864.480  | 1153.74 <sub>3</sub> | 14.47 | y7 (0.08)                                            |
| 879.451  | 2785.35 <sub>3</sub> | 34.93 | b8 (-0.05)                                           |
| 880.546  | 2344.82 <sub>3</sub> | 29.41 | y9-98 (0.09)                                         |
| 936.875  | 2005.57 <sub>3</sub> | 25.15 | b9 (0.34)                                            |
| 960.756  | 1966.22 <sub>3</sub> | 24.66 | y9o (0.32)                                           |
| 978.356  | 2339.57 <sub>3</sub> | 29.34 | y9 (-0.08)                                           |
| 978.758  | 2500.58 <sub>3</sub> | 31.36 | y9 (0.31)                                            |
| 993.571  | 899.94 <sub>3</sub>  | 11.28 | b10 (0.02)                                           |
| 993.824  | 1425.09 <sub>3</sub> | 17.87 | b10 (0.27)                                           |
| 1034.951 | 1148.07 <sub>3</sub> | 14.39 | a11o (0.37)                                          |
| 1052.183 | 593.16 <sub>3</sub>  | 7.43  | a11 (-0.40)                                          |
| 1062.840 | 3387.23 <sub>3</sub> | 42.48 | b11o (0.27)                                          |
| 1071.371 | 6225.43 <sub>3</sub> | 78.08 |                                                      |
| 1080.565 | 1145.86 <sub>3</sub> | 14.37 | b11 (-0.01)                                          |
| 1080.854 | 5708.79 <sub>3</sub> | 71.60 | b11 (0.27)                                           |
| 1093.624 | 1373.82 <sub>3</sub> | 17.23 |                                                      |

|          |                      |       |                          |
|----------|----------------------|-------|--------------------------|
| 1101.838 | 570.32 <sub>3</sub>  | 7.15  |                          |
| 1106.499 | 2975.43 <sub>3</sub> | 37.32 | y10 (-0.00)              |
| 1118.381 | 459.66 <sub>3</sub>  | 5.76  |                          |
| 1207.759 | 2384.75 <sub>3</sub> | 29.91 | y11 (0.21)               |
| 1210.018 | 767.88 <sub>3</sub>  | 9.63  |                          |
| 1214.088 | 3042.84 <sub>3</sub> | 38.16 |                          |
| 1220.150 | 669.23 <sub>3</sub>  | 8.39  |                          |
| 1291.459 | 1587.59 <sub>3</sub> | 19.91 |                          |
| 1293.550 | 2274.93 <sub>3</sub> | 28.53 | a13 (-0.17)              |
| 1295.335 | 947.54 <sub>3</sub>  | 11.88 |                          |
| 1299.937 | 2051.93 <sub>3</sub> | 25.73 |                          |
| 1304.164 | 2404.02 <sub>3</sub> | 30.15 | b13o (0.45)              |
| 1323.903 | 1283.12 <sub>3</sub> | 16.09 |                          |
| 1374.872 | 784.24 <sub>3</sub>  | 9.83  |                          |
| 1392.948 | 1557.46 <sub>3</sub> | 19.53 |                          |
| 1403.594 | 1000.35 <sub>3</sub> | 12.54 | y13 (-0.07)              |
| 1409.775 | 133.05 <sub>3</sub>  | 1.66  |                          |
| 1477.827 | 156.52 <sub>3</sub>  | 1.96  |                          |
| 1482.322 | 166.43 <sub>3</sub>  | 2.08  |                          |
| 1486.155 | 554.99 <sub>3</sub>  | 6.96  |                          |
| 1490.057 | 546.05 <sub>3</sub>  | 6.84  |                          |
| 1532.064 | 334.60 <sub>3</sub>  | 4.19  |                          |
| 1541.394 | 362.74 <sub>3</sub>  | 4.54  | y14o (-0.36)             |
| 1543.169 | 943.66 <sub>3</sub>  | 11.83 | y14* (0.42) : z14 (0.42) |
| 1553.810 | 2038.71 <sub>3</sub> | 25.57 |                          |
| 1559.721 | 629.40 <sub>3</sub>  | 7.89  | y14 (-0.04)              |
| 1612.012 | 301.42 <sub>3</sub>  | 3.78  |                          |
| 1640.960 | 1273.47 <sub>3</sub> | 15.97 | y15o (0.13)              |
| 1642.528 | 846.42 <sub>3</sub>  | 10.61 |                          |
| 1645.509 | 572.75 <sub>3</sub>  | 7.18  |                          |
| 1655.961 | 116.72 <sub>3</sub>  | 1.46  |                          |
| 1659.189 | 3965.60 <sub>3</sub> | 49.73 | y15 (0.35)               |
| 1660.938 | 1060.34              | 13.29 |                          |

S2123

# ProPhosSI MS/MS report

Mass: 656.293692 Charge: 3+

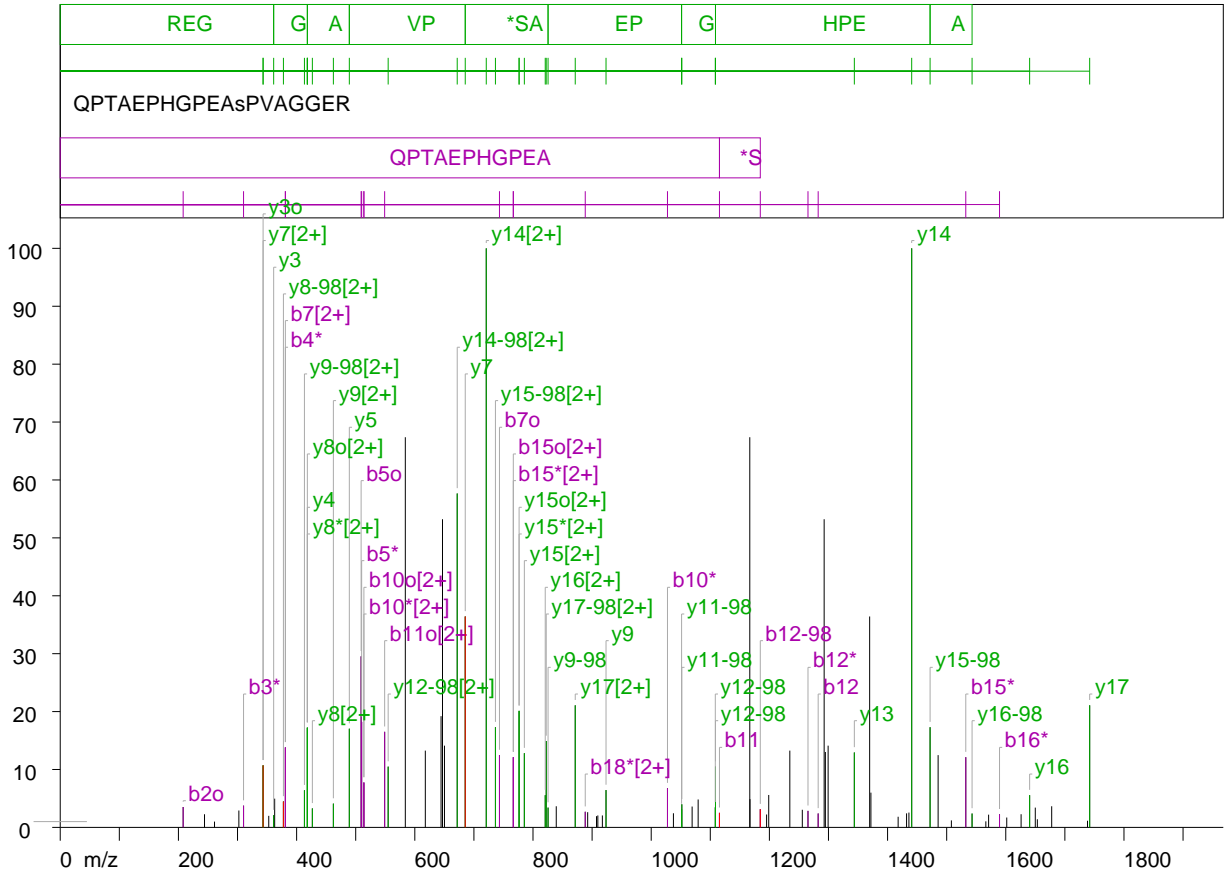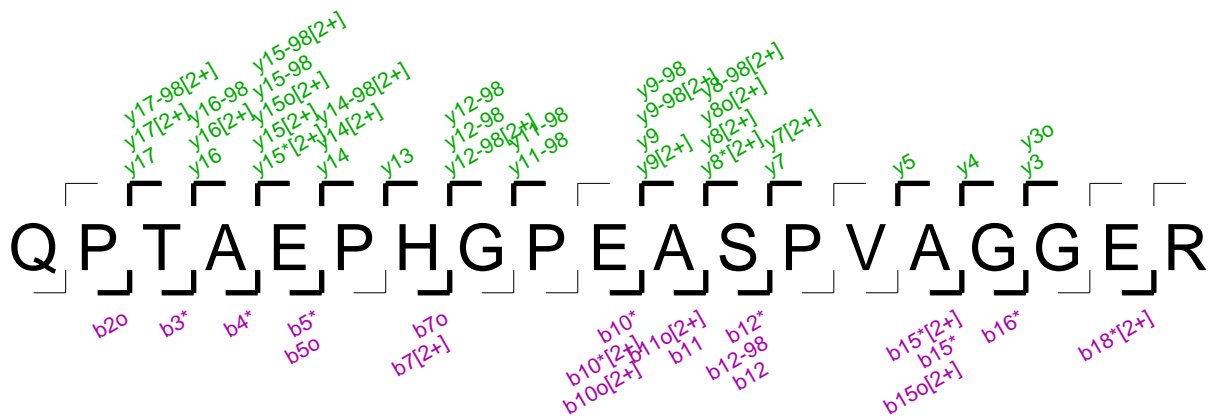

## Cav3.2 human

(36) 2112 QPTAEPHGPEAsPVAGGER 2130 1965.858 (-0.0006) Da

|                         |     |
|-------------------------|-----|
| Parent Ion              | m/z |
| No parent ions observed |     |

## Modifications and supporting evidence

| Position | Residue ID | Modification | Evidence                        |
|----------|------------|--------------|---------------------------------|
| 12       | (2123)     | Phospho (ST) | b11 => b12-98 : y7 => y8-98[2+] |

## Spectrum interpretation

| Rule                                   | passed/tests | Description                                                                                                                                                                                                                                                                                                                                                                                                                                                                                                                                                                  |
|----------------------------------------|--------------|------------------------------------------------------------------------------------------------------------------------------------------------------------------------------------------------------------------------------------------------------------------------------------------------------------------------------------------------------------------------------------------------------------------------------------------------------------------------------------------------------------------------------------------------------------------------------|
| Parent ions present                    | 0/1          | Parent ions corresponding to the parent fragment - 1 phosphate ions were not found                                                                                                                                                                                                                                                                                                                                                                                                                                                                                           |
| Three -98 Ions present                 | 1/1          | 9 des-phospho fragment ions were found.                                                                                                                                                                                                                                                                                                                                                                                                                                                                                                                                      |
| Unique -98 transitions present         | 1/1          | transition b11 to b12-98, transition y7 to y8-98[2+] support unique phosphorylation at position 12<br><br/>                                                                                                                                                                                                                                                                                                                                                                                                                                                                  |
| Four Sequential b or y ions            | 1/1          | Sequence of four y ions found from y14-98 to y17-98.                                                                                                                                                                                                                                                                                                                                                                                                                                                                                                                         |
| Five of six sequential ions present    | 1/1          | Five of Six ions found between y3 and y8<br>Five of Six ions found between y4 and y9<br>Five of Six ions found between y7 and y12<br>Five of Six ions found between y11 and y16<br>Five of Six ions found between y12 and y17                                                                                                                                                                                                                                                                                                                                                |
| Proline directed fragmentation pattern | 4/5          | FAIL: y18-98< y17-98<br/>No proline ions at b2<br/><br>PASS: y14-98> y13-98<br/><br>No proline ions at b6<br/><br>NOTE: G-P is a low abundance fragmentation.<br>PASS: y11-98> y10-98<br/><br>No proline ions at b9<br/><br>NOTE: S-P is a low abundance fragmentation.<br>PASS: y7> y6<br/><br>PASS: b13-98< b12-98<br/>                                                                                                                                                                                                                                                    |
| PhosphoTyrosine transition present     | 0/0          | 0 of 0 phosphotyrosine transitions were found.                                                                                                                                                                                                                                                                                                                                                                                                                                                                                                                               |
| Six of top ten ions identified         | 5/6          | ion 1 (mass: 1440.790: intensity: 2302.98) assigned 1 times<br>ion 2 (mass: 720.899: intensity: 2302.98) assigned 1 times<br>ion 3 (mass: 1166.849: intensity: 1551.78) assigned 0 times<br>ion 4 (mass: 583.928: intensity: 1551.78) assigned 0 times<br>ion 5 (mass: 671.756: intensity: 1328.05) assigned 1 times<br>ion 6 (mass: 646.847: intensity: 1225.65) assigned 0 times<br>ion 7 (mass: 1292.687: intensity: 1225.65) assigned 0 times<br>ion 8 (mass: 685.335: intensity: 838.84) assigned 1 times<br>ion 9 (mass: 1369.663: intensity: 838.84) assigned 0 times |

|   |   |                                                            |
|---|---|------------------------------------------------------------|
| - | - | ion 10 (mass: 509.142: intensity: 680.32) assigned 2 times |
|---|---|------------------------------------------------------------|

## Ion Table

54 ions assigned of 80 ions above threshold (67%).

### N-terminal ions

| AA | N-ion | b                             | b*                                              | b-98                     | bo                             |
|----|-------|-------------------------------|-------------------------------------------------|--------------------------|--------------------------------|
| Q  | 1     | 129.066                       | 112.039                                         | -                        | 111.055                        |
| P  | 2     | 226.119                       | 209.092                                         | -                        | 208.108<br>*208.023 (3)        |
| T  | 3     | 327.166                       | 310.140<br>310.204 (3)                          | -                        | 309.156                        |
| A  | 4     | 398.203                       | 381.177<br>*380.963 (13)                        | -                        | 380.193                        |
| E  | 5     | 527.246                       | 510.220<br>510.043 (18)                         | -                        | 509.236<br>*509.142 (29)       |
| P  | 6     | 624.299                       | 607.272                                         | -                        | 606.288                        |
| H  | 7     | 761.358<br>*380.963 [2+] (13) | 744.331                                         | -                        | 743.347<br>743.276 (12)        |
| G  | 8     | 818.379                       | 801.353                                         | -                        | 800.369                        |
| P  | 9     | 915.432                       | 898.405                                         | -                        | 897.421                        |
| E  | 10    | 1044.475                      | 1027.448<br>1027.533 (6)<br>*513.841 [2+] (7)   | -                        | 1026.464<br>*513.841 [2+] (7)  |
| A  | 11    | 1115.512<br>1115.537 (2)      | 1098.485                                        | -                        | 1097.501<br>548.950 [2+] (16)  |
| s  | 12    | 1282.510<br>1282.579 (2)      | 1265.484<br>1265.319 (2)                        | 1184.524<br>1184.600 (3) | 1264.499                       |
| P  | 13    | 1379.563                      | 1362.536                                        | 1281.577                 | 1361.552                       |
| V  | 14    | 1478.631                      | 1461.605                                        | 1380.645                 | 1460.621                       |
| A  | 15    | 1549.668                      | 1532.642<br>*766.675 [2+] (12)<br>1532.343 (12) | 1451.682                 | 1531.658<br>*766.675 [2+] (12) |
| G  | 16    | 1606.690                      | 1589.663<br>1589.417 (2)                        | 1508.704                 | 1588.679                       |
| G  | 17    | 1663.711                      | 1646.685                                        | 1565.725                 | 1645.701                       |
| E  | 18    | 1792.754                      | 1775.727<br>888.393 [2+] (2)                    | 1694.768                 | 1774.743                       |
| R  | 19    | -                             | -                                               | -                        | -                              |

### C-terminal ions

| AA | C-ion | y                                                | y*                             | y-98                                           | yo                             |
|----|-------|--------------------------------------------------|--------------------------------|------------------------------------------------|--------------------------------|
| Q  | 19    | -                                                | -                              | -                                              | -                              |
| P  | 18    | 1838.807                                         | 1821.780                       | 1740.821                                       | 1820.796                       |
| T  | 17    | 1741.754<br>1741.963 (21)<br>871.485 [2+] (21)   | 1724.728                       | 1643.768<br>822.392 [2+] (14)                  | 1723.744                       |
| A  | 16    | 1640.707<br>1640.396 (5)<br>820.701 [2+] (5)     | 1623.680                       | 1542.721<br>1542.981 (2)                       | 1622.696                       |
| E  | 15    | 1569.669<br>785.356 [2+] (12)                    | 1552.643<br>*776.457 [2+] (20) | 1471.684<br>1471.921 (17)<br>736.464 [2+] (17) | 1551.659<br>*776.457 [2+] (20) |
| P  | 14    | 1440.627<br>1440.790 (100)<br>720.899 [2+] (100) | 1423.600                       | 1342.641<br>671.756 [2+] (57)                  | 1422.616                       |

|   |    |                                               |                               |                                                                |                               |
|---|----|-----------------------------------------------|-------------------------------|----------------------------------------------------------------|-------------------------------|
| H | 13 | 1343.574<br>1343.781 (12)                     | 1326.548                      | 1245.588                                                       | 1325.563                      |
| G | 12 | 1206.515                                      | 1189.489                      | 1108.529<br>554.903 [2+] (10)<br>1108.799 (10)<br>1108.477 (3) | 1188.505                      |
| P | 11 | 1149.494                                      | 1132.467                      | 1051.508<br>1051.448 (3)<br>1051.856 (3)                       | 1131.483                      |
| E | 10 | 1052.441                                      | 1035.414                      | 954.455                                                        | 1034.430                      |
| A | 9  | 923.398<br>462.214 [2+] (4)<br>923.559 (6)    | 906.372                       | 825.412<br>413.237 [2+] (6)<br>825.479 (3)                     | 905.388                       |
| s | 8  | 852.361<br>426.658 [2+] (3)                   | 835.335<br>*418.169 [2+] (17) | 754.375<br>377.681 [2+] (4)                                    | 834.351<br>*418.169 [2+] (17) |
| P | 7  | 685.363<br>685.335 (36)<br>*343.264 [2+] (10) | 668.336                       | -                                                              | 667.352                       |
| V | 6  | 588.310                                       | 571.284                       | -                                                              | 570.300                       |
| A | 5  | 489.242<br>489.183 (17)                       | 472.215                       | -                                                              | 471.231                       |
| G | 4  | 418.205<br>*418.169 (17)                      | 401.178                       | -                                                              | 400.194                       |
| G | 3  | 361.183<br>361.176 (2)                        | 344.157                       | -                                                              | 343.173<br>*343.264 (10)      |
| E | 2  | 304.162                                       | 287.135                       | -                                                              | 286.151                       |
| R | 1  | 175.119                                       | 158.092                       | -                                                              | 157.108                       |

### Ion distribution

| Threshold | Ion count | Matches | % matched |
|-----------|-----------|---------|-----------|
| 0         | 95        | 57      | 60        |
| 0.5       | 93        | 57      | 61        |
| 1         | 88        | 56      | 63        |
| 2         | 80        | 54      | 67        |
| 3         | 62        | 46      | 74        |
| 4         | 49        | 37      | 75        |
| 5         | 44        | 35      | 79        |
| 10        | 36        | 28      | 77        |

### Observed ions > 1%

| m/z     | Intensity           | % max | Assignment (delta)           |
|---------|---------------------|-------|------------------------------|
| 208.023 | 81.11 <sub>,</sub>  | 3.52  | b2o (-0.08) : c4[2+] (-0.09) |
| 244.142 | 52.27 <sub>,</sub>  | 2.26  |                              |
| 302.273 | 67.17 <sub>,</sub>  | 2.91  |                              |
| 310.204 | 86.45 <sub>,</sub>  | 3.75  | b3* (0.06)                   |
| 343.264 | 246.69 <sub>,</sub> | 10.71 | y3o (0.09) : y7[2+] (0.07)   |
| 352.849 | 45.97 <sub>,</sub>  | 1.99  | a4* (-0.33)                  |
| 361.176 | 48.48 <sub>,</sub>  | 2.10  | y3 (-0.00)                   |
| 362.892 | 114.33 <sub>,</sub> | 4.96  |                              |
| 377.681 | 102.99 <sub>,</sub> | 4.47  | y8-98[2+] (-0.01)            |

|          |                      |       |                                                                                 |
|----------|----------------------|-------|---------------------------------------------------------------------------------|
| 380.963  | 318.20 <sub>3</sub>  | 13.81 | b4* (-0.21) : b7[2+] (-0.22)                                                    |
| 413.237  | 147.60 <sub>3</sub>  | 6.40  | y9-98[2+] (0.02)                                                                |
| 418.169  | 396.72 <sub>3</sub>  | 17.22 | y8o[2+] (0.48) : z8[2+] (-0.00) : y8*[2+] (-0.00) : y4 (-0.03) : c8[2+] (-0.03) |
| 426.658  | 75.54 <sub>3</sub>   | 3.28  | y8[2+] (-0.02)                                                                  |
| 462.214  | 94.54 <sub>3</sub>   | 4.10  | y9[2+] (0.01)                                                                   |
| 489.183  | 392.54 <sub>3</sub>  | 17.04 | y5 (-0.05)                                                                      |
| 509.142  | 680.32 <sub>3</sub>  | 29.54 | a10[2+] (0.39) : b5o (-0.09)                                                    |
| 510.043  | 419.48 <sub>3</sub>  | 18.21 | b5* (-0.17)                                                                     |
| 513.841  | 178.50 <sub>3</sub>  | 7.75  | b10o[2+] (0.10) : b10*[2+] (-0.38)                                              |
| 548.950  | 380.16 <sub>3</sub>  | 16.50 | b11o[2+] (-0.30)                                                                |
| 554.903  | 241.68 <sub>3</sub>  | 10.49 | y12-98[2+] (0.13)                                                               |
| 583.928  | 1551.78 <sub>3</sub> | 67.38 |                                                                                 |
| 617.794  | 305.39 <sub>3</sub>  | 13.26 | x12[2+] (0.03)                                                                  |
| 644.435  | 442.40 <sub>3</sub>  | 19.20 |                                                                                 |
| 646.847  | 1225.65 <sub>3</sub> | 53.22 |                                                                                 |
| 650.204  | 325.12 <sub>3</sub>  | 14.11 | c12[2+] (-0.06)                                                                 |
| 671.756  | 1328.05 <sub>3</sub> | 57.66 | y14-98[2+] (-0.06)                                                              |
| 685.335  | 838.84 <sub>3</sub>  | 36.42 | y7 (-0.02)                                                                      |
| 720.899  | 2302.98 <sub>3</sub> | 100   | y14[2+] (0.08)                                                                  |
| 736.464  | 398.46 <sub>3</sub>  | 17.30 | y15-98[2+] (0.11)                                                               |
| 743.276  | 287.42 <sub>3</sub>  | 12.48 | b7o (-0.07)                                                                     |
| 766.675  | 279.21 <sub>3</sub>  | 12.12 | b15o[2+] (0.34) : b15*[2+] (-0.15)                                              |
| 776.457  | 463.50 <sub>3</sub>  | 20.12 | y15o[2+] (0.12) : y15*[2+] (-0.36) : z15[2+] (-0.36)                            |
| 785.356  | 295.11 <sub>3</sub>  | 12.81 | y15[2+] (0.01)                                                                  |
| 820.701  | 128.12 <sub>3</sub>  | 5.56  | y16[2+] (-0.15)                                                                 |
| 822.392  | 343.48 <sub>3</sub>  | 14.91 | y17-98[2+] (0.00)                                                               |
| 825.479  | 78.71 <sub>3</sub>   | 3.41  | y9-98 (0.06)                                                                    |
| 839.348  | 84.06 <sub>3</sub>   | 3.65  |                                                                                 |
| 871.485  | 485.56 <sub>3</sub>  | 21.08 | y17[2+] (0.10)                                                                  |
| 888.393  | 62.22 <sub>3</sub>   | 2.70  | b18*[2+] (0.02)                                                                 |
| 892.503  | 60.50 <sub>3</sub>   | 2.62  |                                                                                 |
| 907.432  | 44.62 <sub>3</sub>   | 1.93  |                                                                                 |
| 909.707  | 47.49 <sub>3</sub>   | 2.06  |                                                                                 |
| 917.369  | 47.52 <sub>3</sub>   | 2.06  |                                                                                 |
| 923.559  | 148.47 <sub>3</sub>  | 6.44  | y9 (0.16)                                                                       |
| 1027.533 | 155.82 <sub>3</sub>  | 6.76  | b10* (0.08)                                                                     |
| 1037.611 | 56.22 <sub>3</sub>   | 2.44  |                                                                                 |
| 1051.448 | 72.60 <sub>3</sub>   | 3.15  | y11-98 (-0.06)                                                                  |
| 1051.856 | 91.84 <sub>3</sub>   | 3.98  | y11-98 (0.34)                                                                   |
| 1069.238 | 82.96 <sub>3</sub>   | 3.60  | a11o (-0.26)                                                                    |



|          |                      |       |                |
|----------|----------------------|-------|----------------|
| 1079.450 | 111.06 <sub>3</sub>  | 4.82  |                |
| 1108.477 | 79.87 <sub>3</sub>   | 3.46  | y12-98 (-0.05) |
| 1108.799 | 241.68 <sub>3</sub>  | 10.49 | y12-98 (0.26)  |
| 1115.537 | 57.78 <sub>3</sub>   | 2.50  | b11 (0.02)     |
| 1166.849 | 1551.78 <sub>3</sub> | 67.38 |                |
| 1167.168 | 112.42 <sub>3</sub>  | 4.88  |                |
| 1184.600 | 72.31 <sub>3</sub>   | 3.13  | b12-98 (0.07)  |
| 1195.270 | 51.30 <sub>3</sub>   | 2.22  |                |
| 1198.889 | 128.94 <sub>3</sub>  | 5.59  |                |
| 1234.581 | 305.39 <sub>3</sub>  | 13.26 | x12 (0.07)     |
| 1255.699 | 70.10 <sub>3</sub>   | 3.04  |                |
| 1265.319 | 65.74 <sub>3</sub>   | 2.85  | b12* (-0.16)   |
| 1282.579 | 55.38 <sub>3</sub>   | 2.40  | b12 (0.06)     |
| 1292.687 | 1225.65 <sub>3</sub> | 53.22 |                |
| 1294.750 | 299.93 <sub>3</sub>  | 13.02 |                |
| 1299.400 | 325.12 <sub>3</sub>  | 14.11 | c12 (-0.13)    |
| 1343.781 | 297.93 <sub>3</sub>  | 12.93 | y13 (0.20)     |
| 1369.663 | 838.84 <sub>3</sub>  | 36.42 |                |
| 1371.801 | 138.20 <sub>3</sub>  | 6.00  | x13 (0.23)     |
| 1417.870 | 42.34 <sub>3</sub>   | 1.83  |                |
| 1432.136 | 55.85 <sub>3</sub>   | 2.42  | a14o (-0.49)   |
| 1436.120 | 58.95 <sub>3</sub>   | 2.55  |                |
| 1440.790 | 2302.98 <sub>3</sub> | 100   | y14 (0.16)     |
| 1471.921 | 398.46 <sub>3</sub>  | 17.30 | y15-98 (0.23)  |
| 1485.545 | 287.42 <sub>3</sub>  | 12.48 |                |
| 1507.971 | 27.87 <sub>3</sub>   | 1.21  |                |
| 1532.343 | 279.21 <sub>3</sub>  | 12.12 | b15* (-0.29)   |
| 1542.981 | 55.14 <sub>3</sub>   | 2.39  | y16-98 (0.25)  |
| 1566.269 | 24.12 <sub>3</sub>   | 1.04  | c15 (-0.42)    |
| 1570.972 | 50.64 <sub>3</sub>   | 2.19  |                |
| 1589.417 | 51.99 <sub>3</sub>   | 2.25  | b16* (-0.24)   |
| 1601.657 | 39.27 <sub>3</sub>   | 1.70  |                |
| 1625.927 | 52.40 <sub>3</sub>   | 2.27  |                |
| 1640.396 | 128.12 <sub>3</sub>  | 5.56  | y16 (-0.31)    |
| 1649.951 | 78.71 <sub>3</sub>   | 3.41  |                |
| 1653.406 | 32.33 <sub>3</sub>   | 1.40  |                |
| 1677.688 | 84.06 <sub>3</sub>   | 3.65  |                |
| 1738.302 | 26.49 <sub>3</sub>   | 1.15  |                |
| 1741.963 | 485.56 <sub>3</sub>  | 21.08 | y17 (0.20)     |

S2188

# ProPhosSI MS/MS report

Mass: 1122.176266 Charge: 3+

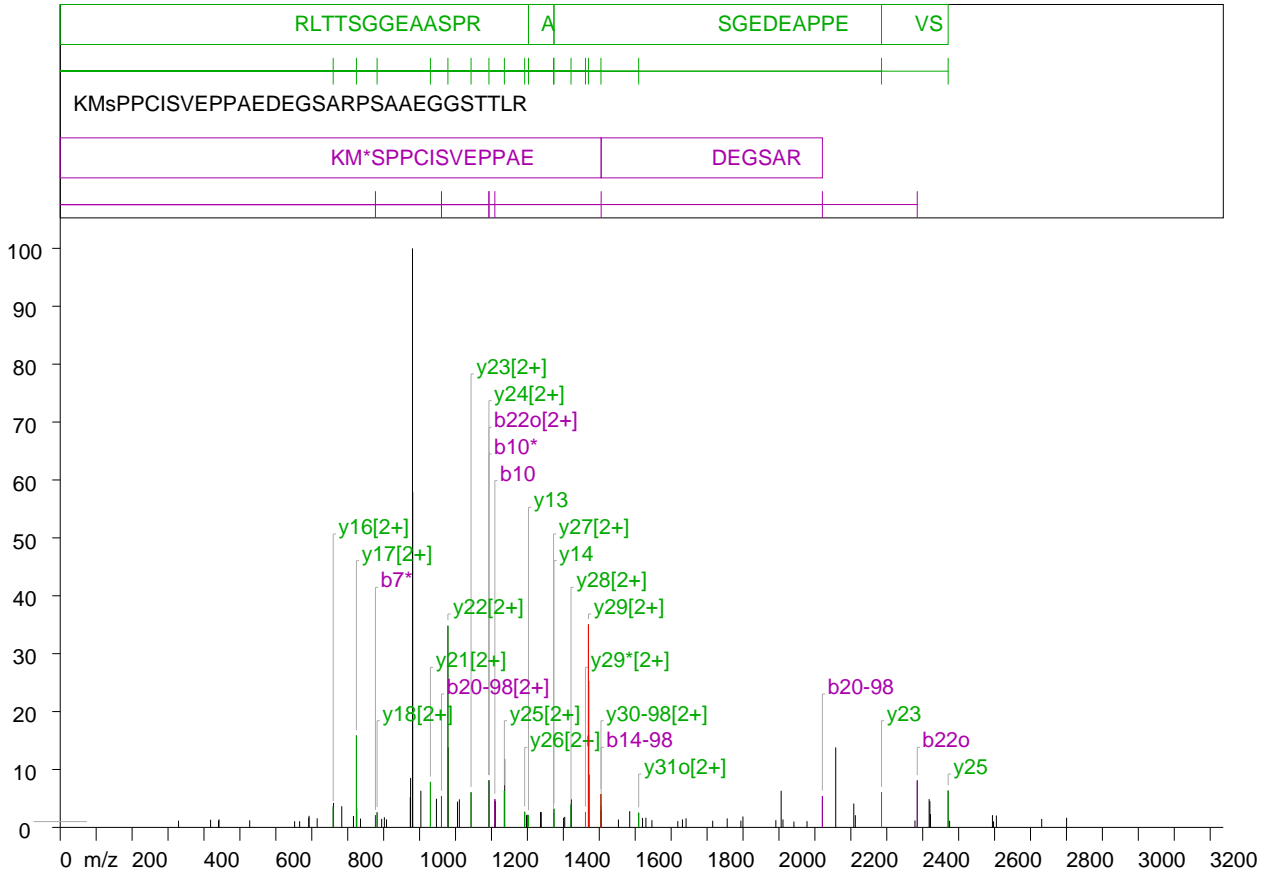

<sup>y31o[2+]</sup>  
<sup>y30-9</sup>  
**KMS**

<sup>y[2+]</sup>  
<sup>y\*[2+]</sup>  
<sup>y28[2+]</sup>  
<sup>y27[2+]</sup>  
<sup>y26[2+]</sup>  
<sup>y25[2+]</sup>  
<sup>y25</sup>  
<sup>y24[2+]</sup>  
<sup>y23</sup>  
<sup>y23[2+]</sup>  
<sup>y22[2+]</sup>  
<sup>y21[2+]</sup>  
<sup>y18[2+]</sup>  
<sup>y17[2+]</sup>  
<sup>y16[2+]</sup>  
<sup>y14</sup>  
<sup>y13</sup>  
**P P C I S V E P P A E D E G S A R P S A A E G G S**  
<sub>b7\*</sub>      <sub>b10\*</sub>      <sub>b10</sub>      <sub>b14-98</sub>      <sub>b20-98[2+]</sub>      <sub>b20-98</sub>      <sub>b22o</sub>      <sub>b22o[2+]</sub>

**T T L R**

## Cav3.2 human

(58) 2186<sup>+</sup>KMsPPCISVEPPAEDEGSARPSAAEGGSTTLR 2217 3363.511 (-0.0060) Da

|                         |     |
|-------------------------|-----|
| Parent Ion              | m/z |
| No parent ions observed |     |

## Modifications and supporting evidence

| Position | Residue ID | Modification | Evidence              |
|----------|------------|--------------|-----------------------|
| 3        | (2188)     | Phospho (ST) | y29[2+] => y30-98[2+] |

## Spectrum interpretation

| Rule                                   | passed/tests | Description                                                                                                                                                                                                                                                                                                                                                                                                                                                                        |
|----------------------------------------|--------------|------------------------------------------------------------------------------------------------------------------------------------------------------------------------------------------------------------------------------------------------------------------------------------------------------------------------------------------------------------------------------------------------------------------------------------------------------------------------------------|
| Parent ions present                    | 0/1          | Parent ions corresponding to the parent fragment - 1 phosphate ions were not found                                                                                                                                                                                                                                                                                                                                                                                                 |
| Three -98 Ions present                 | 1/1          | 3 des-phospho fragment ions were found.                                                                                                                                                                                                                                                                                                                                                                                                                                            |
| Unique -98 transitions present         | 1/1          | transition y29[2+] to y30-98[2+] support unique phosphorylation at $\beta$ position<br><br/>                                                                                                                                                                                                                                                                                                                                                                                       |
| Four Sequential b or y ions            | 1/1          | Sequence of four y ions found from y21 to y24.                                                                                                                                                                                                                                                                                                                                                                                                                                     |
| Five of six sequential ions present    | 1/1          | Five of Six ions found between y13 and y18<br>Five of Six ions found between y20 and y25<br>Five of Six ions found between y21 and y26<br>Five of Six ions found between y22 and y27<br>Five of Six ions found between y23 and y28<br>Five of Six ions found between y24 and y29<br>Five of Six ions found between y25 and y30<br>Five of Six ions found between y26 and y31                                                                                                       |
| Proline directed fragmentation pattern | 5/5          | NOTE: S-P is a low abundance fragmentation.<br>PASS: y29> y28 with ratio 8.89<br/><br>No proline ions at b4-98<br/><br>NOTE: P-P is a low abundance fragmentation.<br>PASS: y28> y27 with ratio 1.60<br/><br>No proline ions at b5-98<br/><br>PASS: y22> y21 with ratio 4.43<br/><br>No proline ions at b11-98<br/><br>NOTE: P-P is a low abundance fragmentation.<br>PASS: y21> y20<br/><br>No proline ions at b12-98<br/><br>No proline ions at y12<br>PASS: b21-98< b20-98<br/> |
| PhosphoTyrosine transition present     | 0/0          | 0 of 0 phosphotyrosine transitions were found.                                                                                                                                                                                                                                                                                                                                                                                                                                     |
| Six of top ten ions identified         | 3/6          | ion 1 (mass: 980.262: intensity: 3754.14) assigned 0 times<br>ion 2 (mass: 980.865: intensity: 2176.51) assigned 0 times<br>ion 3 (mass: 1469.833: intensity: 1315.82) assigned 1 times                                                                                                                                                                                                                                                                                            |

|   |   |                                                                                                                                                                                                                                                                                                                                                                                                                                                 |
|---|---|-------------------------------------------------------------------------------------------------------------------------------------------------------------------------------------------------------------------------------------------------------------------------------------------------------------------------------------------------------------------------------------------------------------------------------------------------|
| - | - | ion 4 (mass: 1078.767: intensity: 1307.76) assigned 1 times<br>ion 5 (mass: 1470.595: intensity: 951.01) assigned 0 times<br>ion 6 (mass: 824.226: intensity: 595.88) assigned 1 times<br>ion 7 (mass: 1079.480: intensity: 518.78) assigned 0 times<br>ion 8 (mass: 2157.952: intensity: 518.78) assigned 0 times<br>ion 9 (mass: 1236.773: intensity: 444.31) assigned 0 times<br>ion 10 (mass: 1471.344: intensity: 342.03) assigned 0 times |
|---|---|-------------------------------------------------------------------------------------------------------------------------------------------------------------------------------------------------------------------------------------------------------------------------------------------------------------------------------------------------------------------------------------------------------------------------------------------------|

## Ion Table

28 ions assigned of 57 ions above threshold (49%).

N-terminal ions

| AA | N-ion | b                        | b*                        | b-98                                          | bo                                             |
|----|-------|--------------------------|---------------------------|-----------------------------------------------|------------------------------------------------|
| K  | 1     | 129.102                  | 112.076                   | -                                             | 111.092                                        |
| M  | 2     | 260.143                  | 243.116                   | -                                             | 242.132                                        |
| s  | 3     | 427.141                  | 410.115                   | 329.155                                       | 409.131                                        |
| P  | 4     | 524.194                  | 507.167                   | 426.208                                       | 506.183                                        |
| P  | 5     | 621.247                  | 604.220                   | 523.261                                       | 603.236                                        |
| C  | 6     | 781.277                  | 764.251                   | 683.291                                       | 763.267                                        |
| I  | 7     | 894.361                  | 877.335<br>877.142 (2)    | 796.375                                       | 876.351                                        |
| S  | 8     | 981.393                  | 964.367                   | 883.408                                       | 963.383                                        |
| V  | 9     | 1080.462                 | 1063.435                  | 982.476                                       | 1062.451                                       |
| E  | 10    | 1209.504<br>1209.420 (4) | 1192.478<br>*1192.918 (8) | 1111.519                                      | 1191.494                                       |
| P  | 11    | 1306.557                 | 1289.531                  | 1208.571                                      | 1288.547                                       |
| P  | 12    | 1403.610                 | 1386.583                  | 1305.624                                      | 1385.599                                       |
| A  | 13    | 1474.647                 | 1457.621                  | 1376.661                                      | 1456.637                                       |
| E  | 14    | 1603.690                 | 1586.663                  | 1505.704<br>1505.260 (2)                      | 1585.679                                       |
| D  | 15    | 1718.717                 | 1701.690                  | 1620.731                                      | 1700.706                                       |
| E  | 16    | 1847.759                 | 1830.733                  | 1749.773                                      | 1829.749                                       |
| G  | 17    | 1904.781                 | 1887.754                  | 1806.795                                      | 1886.770                                       |
| S  | 18    | 1991.813                 | 1974.786                  | 1893.827                                      | 1973.802                                       |
| A  | 19    | 2062.850                 | 2045.823                  | 1964.864                                      | 2044.839                                       |
| R  | 20    | 2218.951                 | 2201.924                  | 2120.965<br>1060.908 [2+] (5)<br>2120.809 (5) | 2200.940                                       |
| P  | 21    | 2316.004                 | 2298.977                  | 2218.018                                      | 2297.993                                       |
| S  | 22    | 2403.036                 | 2386.009                  | 2305.050                                      | 2385.025<br>2384.828 (8)<br>*1192.918 [2+] (8) |
| A  | 23    | 2474.073                 | 2457.046                  | 2376.087                                      | 2456.062                                       |
| A  | 24    | 2545.110                 | 2528.083                  | 2447.124                                      | 2527.099                                       |
| E  | 25    | 2674.153                 | 2657.126                  | 2576.167                                      | 2656.142                                       |
| G  | 26    | 2731.174                 | 2714.148                  | 2633.188                                      | 2713.164                                       |
| G  | 27    | 2788.196                 | 2771.169                  | 2690.210                                      | 2770.185                                       |
| S  | 28    | 2875.228                 | 2858.201                  | 2777.242                                      | 2857.217                                       |
| T  | 29    | 2976.275                 | 2959.249                  | 2878.289                                      | 2958.265                                       |

|   |    |          |          |          |          |
|---|----|----------|----------|----------|----------|
| T | 30 | 3077.323 | 3060.296 | 2979.337 | 3059.312 |
| L | 31 | 3190.407 | 3173.380 | 3092.421 | 3172.396 |
| R | 32 | -        | -        | -        | -        |

### C-terminal ions

| AA | C-ion | y                                             | y*                             | y-98                          | yo                            |
|----|-------|-----------------------------------------------|--------------------------------|-------------------------------|-------------------------------|
| K  | 32    | -                                             | -                              | -                             | -                             |
| M  | 31    | 3236.424                                      | 3219.397                       | 3138.438                      | 3218.413<br>1609.631 [2+] (2) |
| s  | 30    | 3105.383                                      | 3088.357                       | 3007.397<br>1504.631 [2+] (5) | 3087.373                      |
| P  | 29    | 2938.385<br>1469.833 [2+] (35)                | 2921.358<br>*1461.624 [2+] (2) | -                             | 2920.374                      |
| P  | 28    | 2841.332<br>1421.408 [2+] (3)                 | 2824.306                       | -                             | 2823.322                      |
| C  | 27    | 2744.279<br>1372.779 [2+] (2)                 | 2727.253                       | -                             | 2726.269                      |
| I  | 26    | 2584.249<br>1292.403 [2+] (2)                 | 2567.222                       | -                             | 2566.238                      |
| S  | 25    | 2471.165<br>2470.802 (6)<br>1235.905 [2+] (6) | 2454.138                       | -                             | 2453.154                      |
| V  | 24    | 2384.133<br>*1192.918 [2+] (8)                | 2367.106                       | -                             | 2366.122                      |
| E  | 23    | 2285.064<br>1143.205 [2+] (6)<br>2285.403 (6) | 2268.038                       | -                             | 2267.054                      |
| P  | 22    | 2156.022<br>1078.767 [2+] (34)                | 2138.995                       | -                             | 2138.011                      |
| P  | 21    | 2058.969<br>1030.117 [2+] (7)                 | 2041.942                       | -                             | 2040.958                      |
| A  | 20    | 1961.916                                      | 1944.890                       | -                             | 1943.905                      |
| E  | 19    | 1890.879                                      | 1873.852                       | -                             | 1872.868                      |
| D  | 18    | 1761.836<br>881.747 [2+] (2)                  | 1744.810                       | -                             | 1743.826                      |
| E  | 17    | 1646.809<br>824.226 [2+] (15)                 | 1629.783                       | -                             | 1628.799                      |
| G  | 16    | 1517.767<br>759.580 [2+] (3)                  | 1500.740                       | -                             | 1499.756                      |
| S  | 15    | 1460.745                                      | 1443.719                       | -                             | 1442.735                      |
| A  | 14    | 1373.713<br>1373.875 (3)                      | 1356.687                       | -                             | 1355.703                      |
| R  | 13    | 1302.676<br>1302.977 (2)                      | 1285.650                       | -                             | 1284.666                      |
| P  | 12    | 1146.575                                      | 1129.549                       | -                             | 1128.564                      |
| S  | 11    | 1049.522                                      | 1032.496                       | -                             | 1031.512                      |
| A  | 10    | 962.490                                       | 945.464                        | -                             | 944.480                       |
| A  | 9     | 891.453                                       | 874.427                        | -                             | 873.443                       |
| E  | 8     | 820.416                                       | 803.389                        | -                             | 802.405                       |
| G  | 7     | 691.373                                       | 674.347                        | -                             | 673.363                       |
| G  | 6     | 634.352                                       | 617.325                        | -                             | 616.341                       |
| S  | 5     | 577.330                                       | 560.304                        | -                             | 559.320                       |
| T  | 4     | 490.298                                       | 473.272                        | -                             | 472.288                       |
| T  | 3     | 389.251                                       | 372.224                        | -                             | 371.240                       |

|   |   |         |         |   |         |
|---|---|---------|---------|---|---------|
| L | 2 | 288.203 | 271.177 | - | 270.193 |
| R | 1 | 175.119 | 158.092 | - | 157.108 |

### Ion distribution

| Threshold | Ion count | Matches | % matched |
|-----------|-----------|---------|-----------|
| 0         | 128       | 53      | 41        |
| 0.5       | 119       | 51      | 42        |
| 1         | 92        | 44      | 47        |
| 2         | 56        | 28      | 50        |
| 3         | 39        | 20      | 51        |
| 4         | 34        | 17      | 50        |
| 5         | 24        | 14      | 58        |
| 10        | 9         | 3       | 33        |

### Observed ions > 1%

| m/z     | Intensity            | % max | Assignment (delta)                 |
|---------|----------------------|-------|------------------------------------|
| 329.224 | 43.48 <sub>,</sub>   | 1.15  | b3-98 (0.06)                       |
| 418.422 | 49.98 <sub>,</sub>   | 1.33  |                                    |
| 440.451 | 45.18 <sub>,</sub>   | 1.20  |                                    |
| 441.891 | 51.90 <sub>,</sub>   | 1.38  | b8-98[2+] (-0.31)                  |
| 527.285 | 45.80 <sub>,</sub>   | 1.21  |                                    |
| 652.221 | 39.98 <sub>,</sub>   | 1.06  | y13[2+] (0.37)                     |
| 666.141 | 40.63 <sub>,</sub>   | 1.08  | x13[2+] (0.30)                     |
| 691.431 | 63.01 <sub>,</sub>   | 1.67  | y7 (0.05)                          |
| 692.467 | 75.11 <sub>,</sub>   | 2.00  |                                    |
| 714.961 | 59.07 <sub>,</sub>   | 1.57  | a13o[2+] (0.13) : a13*[2+] (-0.35) |
| 759.580 | 135.55 <sub>,</sub>  | 3.61  | y16[2+] (0.19)                     |
| 760.516 | 158.54 <sub>,</sub>  | 4.22  |                                    |
| 783.371 | 137.07 <sub>,</sub>  | 3.65  |                                    |
| 816.009 | 73.54 <sub>,</sub>   | 1.95  |                                    |
| 824.226 | 595.88 <sub>,</sub>  | 15.87 | y17[2+] (0.31)                     |
| 825.118 | 123.48 <sub>,</sub>  | 3.28  |                                    |
| 835.562 | 57.02 <sub>,</sub>   | 1.51  |                                    |
| 877.142 | 78.19 <sub>,</sub>   | 2.08  | b7* (-0.19)                        |
| 881.747 | 97.75 <sub>,</sub>   | 2.60  | y18[2+] (0.32)                     |
| 894.444 | 54.97 <sub>,</sub>   | 1.46  | b7 (0.08)                          |
| 901.998 | 65.67 <sub>,</sub>   | 1.74  | a16*[2+] (0.12)                    |
| 908.034 | 51.73 <sub>,</sub>   | 1.37  |                                    |
| 974.121 | 195.46 <sub>,</sub>  | 5.20  | a18*[2+] (0.22)                    |
| 974.930 | 320.45 <sub>,</sub>  | 8.53  |                                    |
| 980.262 | 3754.14 <sub>,</sub> | 100   |                                    |

|          |                      |       |                                                    |
|----------|----------------------|-------|----------------------------------------------------|
| 980.865  | 2176.51 <sub>3</sub> | 57.97 |                                                    |
| 1003.539 | 237.53 <sub>3</sub>  | 6.32  |                                                    |
| 1030.117 | 294.98 <sub>3</sub>  | 7.85  | y21[2+] (0.12)                                     |
| 1046.845 | 185.41 <sub>3</sub>  | 4.93  |                                                    |
| 1060.908 | 203.83 <sub>3</sub>  | 5.42  | b20-98[2+] (-0.07)                                 |
| 1078.767 | 1307.76 <sub>3</sub> | 34.83 | y22[2+] (0.25)                                     |
| 1079.480 | 518.78 <sub>3</sub>  | 13.81 |                                                    |
| 1105.465 | 166.97 <sub>3</sub>  | 4.44  |                                                    |
| 1110.596 | 181.94 <sub>3</sub>  | 4.84  |                                                    |
| 1143.205 | 227.96 <sub>3</sub>  | 6.07  | y23[2+] (0.16)                                     |
| 1192.918 | 304.55 <sub>3</sub>  | 8.11  | b10* (0.43) : y24[2+] (0.34)<br>: b22o[2+] (-0.09) |
| 1209.420 | 183.20 <sub>3</sub>  | 4.87  | b10 (-0.08)                                        |
| 1210.526 | 169.62 <sub>3</sub>  | 4.51  | c22[2+] (-0.00)                                    |
| 1235.905 | 239.00 <sub>3</sub>  | 6.36  | y25[2+] (-0.18)                                    |
| 1236.773 | 444.31 <sub>3</sub>  | 11.83 |                                                    |
| 1292.403 | 101.11 <sub>3</sub>  | 2.69  | y26[2+] (-0.22)                                    |
| 1297.532 | 79.61 <sub>3</sub>   | 2.12  |                                                    |
| 1301.261 | 82.77 <sub>3</sub>   | 2.20  |                                                    |
| 1302.977 | 76.66 <sub>3</sub>   | 2.04  | y13 (0.30)                                         |
| 1336.657 | 100.55 <sub>3</sub>  | 2.67  |                                                    |
| 1338.454 | 98.63 <sub>3</sub>   | 2.62  |                                                    |
| 1372.779 | 92.23 <sub>3</sub>   | 2.45  | y27[2+] (0.13)                                     |
| 1373.875 | 121.55 <sub>3</sub>  | 3.23  | y14 (0.16)                                         |
| 1400.716 | 62.40 <sub>3</sub>   | 1.66  |                                                    |
| 1403.906 | 68.62 <sub>3</sub>   | 1.82  | b12 (0.29)                                         |
| 1421.408 | 147.95 <sub>3</sub>  | 3.94  | y28[2+] (0.23)                                     |
| 1422.163 | 182.13 <sub>3</sub>  | 4.85  |                                                    |
| 1461.624 | 100.32 <sub>3</sub>  | 2.67  | y29*[2+] (0.44) : z29[2+] (0.44)                   |
| 1469.833 | 1315.82 <sub>3</sub> | 35.04 | y29[2+] (0.13)                                     |
| 1470.595 | 951.01 <sub>3</sub>  | 25.33 |                                                    |
| 1471.344 | 342.03 <sub>3</sub>  | 9.11  |                                                    |
| 1504.631 | 215.47 <sub>3</sub>  | 5.73  | y30-98[2+] (0.42)                                  |
| 1505.260 | 109.43 <sub>3</sub>  | 2.91  | b14-98 (-0.44)                                     |
| 1553.290 | 50.82 <sub>3</sub>   | 1.35  | y30[2+] (0.09)                                     |
| 1584.638 | 104.91 <sub>3</sub>  | 2.79  |                                                    |
| 1609.631 | 95.16 <sub>3</sub>   | 2.53  | y31o[2+] (-0.07)                                   |
| 1620.408 | 61.37 <sub>3</sub>   | 1.63  | c14 (-0.30) : b15-98 (-0.32)                       |
| 1629.726 | 62.82 <sub>3</sub>   | 1.67  | y17* (-0.05) : z17 (-0.05)                         |
| 1646.482 | 46.70 <sub>3</sub>   | 1.24  | y17 (-0.32)                                        |
| 1718.572 | 40.86 <sub>3</sub>   | 1.08  | b15 (-0.14)                                        |
| 1731.424 | 51.55 <sub>3</sub>   | 1.37  |                                                    |
| 1741.538 | 58.98 <sub>3</sub>   | 1.57  |                                                    |



|          |         |       |                |
|----------|---------|-------|----------------|
| 1815.667 | 43.44,  | 1.15  |                |
| 1855.912 | 58.26,  | 1.55  |                |
| 1894.052 | 43.73,  | 1.16  | b18-98 (0.22)  |
| 1899.767 | 70.65,  | 1.88  |                |
| 1991.311 | 46.71,  | 1.24  |                |
| 2006.070 | 237.53, | 6.32  |                |
| 2011.167 | 51.76,  | 1.37  |                |
| 2078.044 | 40.32,  | 1.07  |                |
| 2120.809 | 203.83, | 5.42  | b20-98 (-0.15) |
| 2157.952 | 518.78, | 13.81 |                |
| 2208.211 | 154.52, | 4.11  |                |
| 2212.514 | 78.89,  | 2.10  |                |
| 2285.403 | 227.96, | 6.07  | y23 (0.33)     |
| 2378.439 | 45.17,  | 1.20  |                |
| 2384.828 | 304.55, | 8.11  | b22o (-0.19)   |
| 2417.833 | 183.20, | 4.87  |                |
| 2420.044 | 169.62, | 4.51  | c22 (-0.01)    |
| 2421.734 | 86.52,  | 2.30  |                |
| 2470.802 | 239.00, | 6.36  | y25 (-0.36)    |
| 2474.905 | 42.95,  | 1.14  |                |
| 2594.056 | 79.61,  | 2.12  |                |
| 2597.076 | 39.50,  | 1.05  |                |
| 2604.947 | 76.66,  | 2.04  |                |
| 2731.133 | 54.69,  | 1.45  | b26 (-0.04)    |
| 2800.424 | 62.40,  | 1.66  |                |

S2193

# ProPhosSI MS/MS report

Mass: 841.886448 Charge: 4+

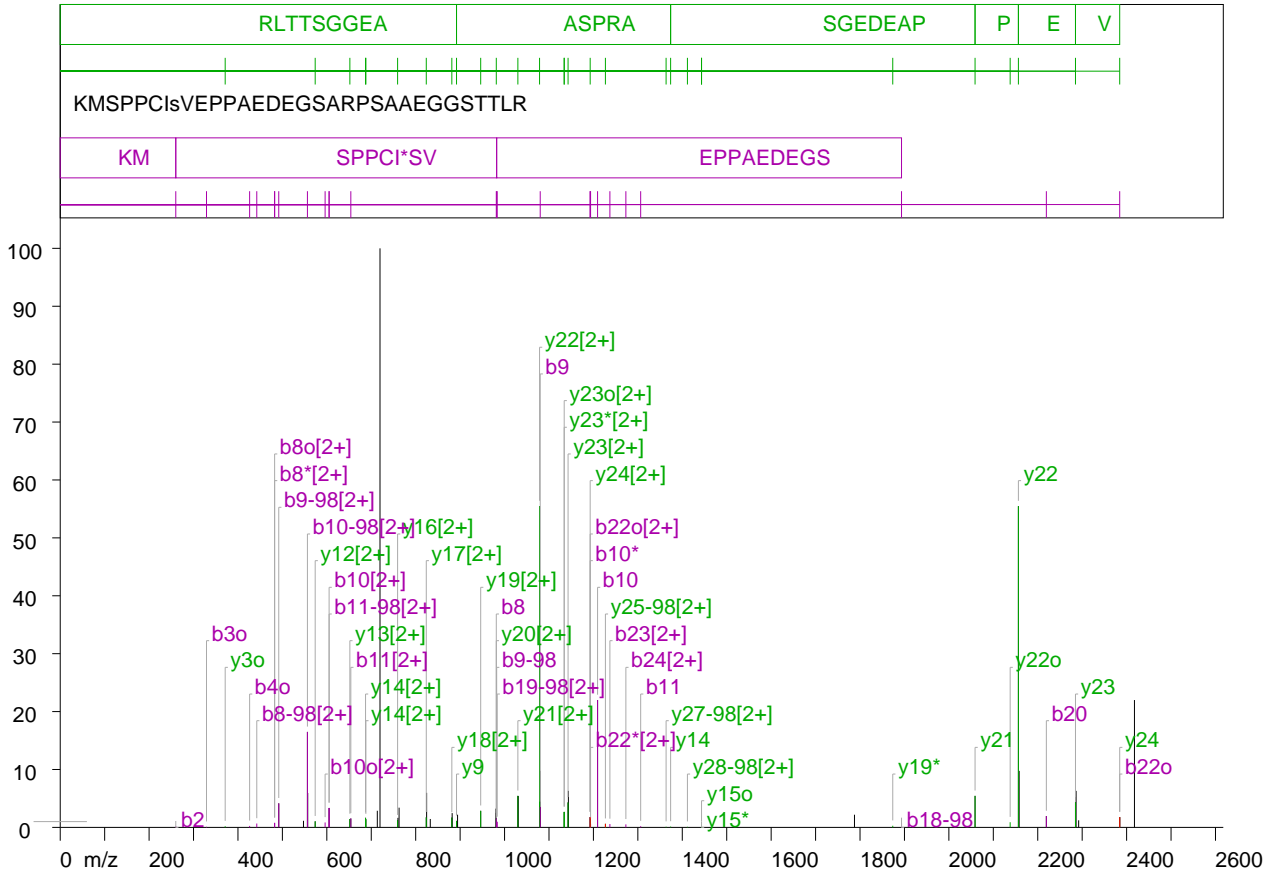

**KMS**  
b2 b30

y28-98[2+] y27-98[2+] y25-98[2+] y24[2+] y23[2+] y23o[2+] y22[2+] y21 y21[2+] y20[2+] y19[2+] y18[2+] y17[2+] y16[2+] y15o y15\* y14[2+] y14 y13[2+] y12[2+] y9  
**P P C I S V E P P A E D E G S A R P S A A E G G S**  
b40 b8\*[2+] b8o[2+] b8-98[2+] b8 b9-98 b10\* b10o[2+] b10-98[2+] b10 b11[2+] b11 b18-98 b19-98[2+] b20 b22\*[2+] b22o[2+] b23[2+] b23o[2+] b24[2+]

y30  
**TTLR**

## Cav3.2 Human

(27) 2186 KMSPPCIsVEPPAEDEGSARPSAAEGGSTTLR 2217 3363.511 (0.0031) Da

|                         |     |
|-------------------------|-----|
| Parent Ion              | m/z |
| No parent ions observed |     |

### Modifications and supporting evidence

| Position | Residue ID | Modification | Evidence          |
|----------|------------|--------------|-------------------|
| 8        | (2193)     | Phospho (ST) | y24 => y25-98[2+] |

### Spectrum interpretation

| Rule                                   | passed/tests | Description                                                                                                                                                                                                                                                                                                                                                                                                                                                                                                                                                                                                       |
|----------------------------------------|--------------|-------------------------------------------------------------------------------------------------------------------------------------------------------------------------------------------------------------------------------------------------------------------------------------------------------------------------------------------------------------------------------------------------------------------------------------------------------------------------------------------------------------------------------------------------------------------------------------------------------------------|
| Parent ions present                    | 0/1          | Parent ions corresponding to the parent fragment - 1 phosphate ions were not found                                                                                                                                                                                                                                                                                                                                                                                                                                                                                                                                |
| Three -98 Ions present                 | 1/1          | 9 des-phospho fragment ions were found.                                                                                                                                                                                                                                                                                                                                                                                                                                                                                                                                                                           |
| Unique -98 transitions present         | 1/1          | transition y24 to y25-98[2+] support unique phosphorylation at position 8<br><br/>                                                                                                                                                                                                                                                                                                                                                                                                                                                                                                                                |
| Four Sequential b or y ions            | 1/1          | Sequence of four b ions found from b8-98 to b11-98.<br>Sequence of four y ions found from y16 to y19.                                                                                                                                                                                                                                                                                                                                                                                                                                                                                                             |
| Five of six sequential ions present    | 1/1          | Five of Six ions found between y12 and y17<br>Five of Six ions found between y13 and y18<br>Five of Six ions found between y14 and y19<br>Five of Six ions found between y15 and y20<br>Five of Six ions found between y16 and y21<br>Five of Six ions found between y17 and y22<br>Five of Six ions found between y18 and y23<br>Five of Six ions found between y19 and y24<br>Five of Six ions found between y20 and y25<br>Five of Six ions found between y21 and y26<br>Five of Six ions found between y22 and y27<br>Five of Six ions found between y23 and y28                                              |
| Proline directed fragmentation pattern | 5/7          | NOTE: S-P is a low abundance fragmentation.<br>FAIL: y29-98< y28-98<br/>No proline ions at b4<br/><br>NOTE: P-P is a low abundance fragmentation.<br>FAIL: y28-98< y27-98<br/>No proline ions at b5<br/><br>PASS: y22> y21 with ratio 10.1<br/><br>PASS: b11-98< b10-98 with ratio 4.91<br/><br>NOTE: P-P is a low abundance fragmentation.<br>PASS: y21> y20 with ratio 3.42<br/><br>PASS: b12-98< b11-98<br/><br>PASS: y12> y11<br/><br>No proline ions at b21-98<br/>                                                                                                                                          |
| PhosphoTyrosine transition present     | 0/0          | 0 of 0 phosphotyrosine transitions were found.                                                                                                                                                                                                                                                                                                                                                                                                                                                                                                                                                                    |
| Six of top ten ions identified         | 5/6          | ion 1 (mass: 719.667: intensity: 57415.99)<br>assigned 1 times<br>ion 2 (mass: 2156.482: intensity: 31855.42)<br>assigned 1 times<br>ion 3 (mass: 1078.745: intensity: 31855.42)<br>assigned 1 times<br>ion 4 (mass: 2417.624: intensity: 12627.39)<br>assigned 0 times<br>ion 5 (mass: 1209.315: intensity: 12627.39)<br>assigned 1 times<br>ion 6 (mass: 556.318: intensity: 9467.88)<br>assigned 1 times<br>ion 7 (mass: 2158.159: intensity: 5604.41)<br>assigned 0 times<br>ion 8 (mass: 1079.583: intensity: 5604.41)<br>assigned 0 times<br>ion 9 (mass: 2286.326: intensity: 3623.36)<br>assigned 0 times |

|   |   |                                                                 |
|---|---|-----------------------------------------------------------------|
| - | - | ion 10 (mass: 1143.667: intensity: 3623.36)<br>assigned 0 times |
|---|---|-----------------------------------------------------------------|

## Ion Table

50 ions assigned of 101 ions above threshold (49%).

N-terminal ions

| AA | N-ion | b                                              | b*                            | b-98                                        | bo                                              |
|----|-------|------------------------------------------------|-------------------------------|---------------------------------------------|-------------------------------------------------|
| K  | 1     | 129.102                                        | 112.076                       | -                                           | 111.092                                         |
| M  | 2     | 260.143<br>*260.069 (0)                        | 243.116                       | -                                           | 242.132                                         |
| S  | 3     | 347.175                                        | 330.148                       | -                                           | 329.164<br>*329.195 (0)                         |
| P  | 4     | 444.228                                        | 427.201                       | -                                           | 426.217<br>426.290 (0)                          |
| P  | 5     | 541.280                                        | 524.254                       | -                                           | 523.270                                         |
| C  | 6     | 701.311                                        | 684.284                       | -                                           | 683.300                                         |
| I  | 7     | 814.395                                        | 797.369                       | -                                           | 796.385                                         |
| s  | 8     | 981.393<br>*981.410 (1)                        | 964.367<br>*482.537 [2+] (0)  | 883.408<br>442.367 [2+] (0)                 | 963.383<br>*482.537 [2+] (0)                    |
| V  | 9     | 1080.462<br>1080.275 (3)                       | 1063.435                      | 982.476<br>491.841 [2+] (4)<br>*982.246 (1) | 1062.451                                        |
| E  | 10    | 1209.504<br>1209.315 (21)<br>*605.153 [2+] (3) | 1192.478<br>*1192.737 (1)     | 1111.519<br>556.318 [2+] (16)               | 1191.494<br>596.136 [2+] (0)                    |
| P  | 11    | 1306.557<br>654.038 [2+] (1)<br>1306.361 (0)   | 1289.531                      | 1208.571<br>*605.153 [2+] (3)               | 1288.547                                        |
| P  | 12    | 1403.610                                       | 1386.583                      | 1305.624                                    | 1385.599                                        |
| A  | 13    | 1474.647                                       | 1457.621                      | 1376.661                                    | 1456.637                                        |
| E  | 14    | 1603.690                                       | 1586.663                      | 1505.704                                    | 1585.679                                        |
| D  | 15    | 1718.717                                       | 1701.690                      | 1620.731                                    | 1700.706                                        |
| E  | 16    | 1847.759                                       | 1830.733                      | 1749.773                                    | 1829.749                                        |
| G  | 17    | 1904.781                                       | 1887.754                      | 1806.795                                    | 1886.770                                        |
| S  | 18    | 1991.813                                       | 1974.786                      | 1893.827<br>1893.401 (0)                    | 1973.802                                        |
| A  | 19    | 2062.850                                       | 2045.823                      | 1964.864<br>983.388 [2+] (0)                | 2044.839                                        |
| R  | 20    | 2218.951<br>2219.399 (1)                       | 2201.924                      | 2120.965                                    | 2200.940                                        |
| P  | 21    | 2316.004                                       | 2298.977                      | 2218.018                                    | 2297.993                                        |
| S  | 22    | 2403.036                                       | 2386.009<br>1193.626 [2+] (0) | 2305.050                                    | 2385.025<br>*2384.467 (1)<br>*1192.737 [2+] (1) |
| A  | 23    | 2474.073<br>1237.041 [2+] (0)                  | 2457.046                      | 2376.087                                    | 2456.062                                        |
| A  | 24    | 2545.110<br>1273.003 [2+] (0)                  | 2528.083                      | 2447.124                                    | 2527.099                                        |
| E  | 25    | 2674.153                                       | 2657.126                      | 2576.167                                    | 2656.142                                        |
| G  | 26    | 2731.174                                       | 2714.148                      | 2633.188                                    | 2713.164                                        |
| G  | 27    | 2788.196                                       | 2771.169                      | 2690.210                                    | 2770.185                                        |
| S  | 28    | 2875.228                                       | 2858.201                      | 2777.242                                    | 2857.217                                        |
| T  | 29    | 2976.275                                       | 2959.249                      | 2878.289                                    | 2958.265                                        |
| T  | 30    | 3077.323                                       | 3060.296                      | 2979.337                                    | 3059.312                                        |

|   |    |          |          |          |          |
|---|----|----------|----------|----------|----------|
| L | 31 | 3190.407 | 3173.380 | 3092.421 | 3172.396 |
| R | 32 | -        | -        | -        | -        |

### C-terminal ions

| AA | C-ion | y                                                                 | y*                             | y-98                           | yo                             |
|----|-------|-------------------------------------------------------------------|--------------------------------|--------------------------------|--------------------------------|
| K  | 32    | -                                                                 | -                              | -                              | -                              |
| M  | 31    | 3236.424                                                          | 3219.397                       | 3138.438                       | 3218.413                       |
| S  | 30    | 3105.383                                                          | 3088.357                       | 3007.397                       | 3087.373                       |
| P  | 29    | 3018.351                                                          | 3001.325                       | 2920.365                       | 3000.341                       |
| P  | 28    | 2921.298                                                          | 2904.272                       | 2823.313<br>1411.587 [2+] (0)  | 2903.288                       |
| C  | 27    | 2824.246                                                          | 2807.219                       | 2726.260<br>1363.538 [2+] (0)  | 2806.235                       |
| I  | 26    | 2664.215                                                          | 2647.188                       | 2566.229                       | 2646.204                       |
| s  | 25    | 2551.131                                                          | 2534.104                       | 2453.145<br>*1227.002 [2+] (0) | 2533.120                       |
| V  | 24    | 2384.133<br>*2384.467 (1)<br>*1192.737 [2+] (1)                   | 2367.106                       | -                              | 2366.122                       |
| E  | 23    | 2285.064<br>2284.937 (4)<br>1142.972 [2+] (4)                     | 2268.038<br>*1134.249 [2+] (2) | -                              | 2267.054<br>*1134.249 [2+] (2) |
| P  | 22    | 2156.022<br>2156.482 (55)<br>1078.745 [2+] (55)                   | 2138.995                       | -                              | 2138.011<br>2137.909 (0)       |
| P  | 21    | 2058.969<br>1029.969 [2+] (5)<br>2058.932 (5)                     | 2041.942                       | -                              | 2040.958                       |
| A  | 20    | 1961.916<br>*981.410 [2+] (1)                                     | 1944.890                       | -                              | 1943.905                       |
| E  | 19    | 1890.879<br>946.310 [2+] (2)                                      | 1873.852<br>*1873.676 (0)      | -                              | 1872.868                       |
| D  | 18    | 1761.836<br>881.348 [2+] (1)                                      | 1744.810                       | -                              | 1743.826                       |
| E  | 17    | 1646.809<br>823.847 [2+] (1)                                      | 1629.783                       | -                              | 1628.799                       |
| G  | 16    | 1517.767<br>759.316 [2+] (1)                                      | 1500.740                       | -                              | 1499.756                       |
| S  | 15    | 1460.745                                                          | 1443.719<br>*1443.314 (0)      | -                              | 1442.735<br>*1443.314 (0)      |
| A  | 14    | 1373.713<br>687.173 [2+] (1)<br>1373.738 (0)<br>*687.887 [2+] (1) | 1356.687                       | -                              | 1355.703                       |
| R  | 13    | 1302.676<br>651.828 [2+] (1)                                      | 1285.650                       | -                              | 1284.666                       |
| P  | 12    | 1146.575<br>573.784 [2+] (1)                                      | 1129.549                       | -                              | 1128.564                       |
| S  | 11    | 1049.522                                                          | 1032.496                       | -                              | 1031.512                       |
| A  | 10    | 962.490                                                           | 945.464                        | -                              | 944.480                        |
| A  | 9     | 891.453<br>891.895 (1)                                            | 874.427                        | -                              | 873.443                        |
| E  | 8     | 820.416                                                           | 803.389                        | -                              | 802.405                        |
| G  | 7     | 691.373                                                           | 674.347                        | -                              | 673.363                        |
| G  | 6     | 634.352                                                           | 617.325                        | -                              | 616.341                        |
| S  | 5     | 577.330                                                           | 560.304                        | -                              | 559.320                        |
| T  | 4     | 490.298                                                           | 473.272                        | -                              | 472.288                        |

|   |   |         |         |   |                        |
|---|---|---------|---------|---|------------------------|
| T | 3 | 389.251 | 372.224 | - | 371.240<br>371.251 (0) |
| L | 2 | 288.203 | 271.177 | - | 270.193                |
| R | 1 | 175.119 | 158.092 | - | 157.108                |

### Ion distribution

| Threshold | Ion count | Matches | % matched |
|-----------|-----------|---------|-----------|
| 0         | 124       | 53      | 42        |
| 0.5       | 61        | 39      | 63        |
| 1         | 46        | 28      | 60        |
| 2         | 28        | 14      | 50        |
| 3         | 22        | 12      | 54        |
| 4         | 18        | 10      | 55        |
| 5         | 15        | 7       | 46        |
| 10        | 6         | 5       | 83        |

### Observed ions > 1%

| m/z     | Intensity             | % max | Assignment (delta)                               |
|---------|-----------------------|-------|--------------------------------------------------|
| 491.841 | 2386.16 <sub>2</sub>  | 4.15  | b9-98[2+] (0.09)                                 |
| 547.455 | 652.83 <sub>2</sub>   | 1.13  |                                                  |
| 556.318 | 9467.88 <sub>2</sub>  | 16.48 | b10-98[2+] (0.05)                                |
| 556.989 | 3411.34 <sub>2</sub>  | 5.94  |                                                  |
| 573.784 | 603.96 <sub>2</sub>   | 1.05  | y12[2+] (-0.00)                                  |
| 605.153 | 1926.87 <sub>2</sub>  | 3.35  | b11-98[2+] (0.36) : b10[2+] (-0.10) : x5 (-0.17) |
| 651.828 | 827.78 <sub>2</sub>   | 1.44  | y13[2+] (-0.01)                                  |
| 654.038 | 886.29 <sub>2</sub>   | 1.54  | b11[2+] (0.25)                                   |
| 687.173 | 950.82 <sub>2</sub>   | 1.65  | y14[2+] (-0.18)                                  |
| 687.887 | 812.25 <sub>2</sub>   | 1.41  | y14[2+] (0.52) : a12[2+] (-0.42)                 |
| 713.612 | 1649.89 <sub>2</sub>  | 2.87  |                                                  |
| 719.667 | 57415.99 <sub>2</sub> | 100   | x7 (0.29)                                        |
| 759.316 | 704.25 <sub>2</sub>   | 1.22  | y16[2+] (-0.07)                                  |
| 760.007 | 947.01 <sub>2</sub>   | 1.64  |                                                  |
| 762.591 | 1956.60 <sub>2</sub>  | 3.40  |                                                  |
| 823.847 | 1001.12 <sub>2</sub>  | 1.74  | y17[2+] (-0.06)                                  |
| 824.603 | 3428.06 <sub>2</sub>  | 5.97  |                                                  |
| 832.848 | 834.41 <sub>2</sub>   | 1.45  |                                                  |
| 881.348 | 970.71 <sub>2</sub>   | 1.69  | y18[2+] (-0.07)                                  |
| 882.071 | 1417.35 <sub>2</sub>  | 2.46  |                                                  |
| 891.895 | 646.65 <sub>2</sub>   | 1.12  | y9 (0.44)                                        |
| 894.257 | 1256.56 <sub>2</sub>  | 2.18  |                                                  |
| 946.310 | 1645.11 <sub>2</sub>  | 2.86  | y19[2+] (0.36)                                   |
| 980.479 | 1861.05 <sub>2</sub>  | 3.24  |                                                  |
| 981.410 | 913.41 <sub>2</sub>   | 1.59  | b8 (0.01) : y20[2+] (-0.05)                      |

|          |                       |       |                                                      |
|----------|-----------------------|-------|------------------------------------------------------|
| 982.246  | 585.36 <sub>,</sub>   | 1.01  | a18[2+] (-0.16) : b9-98 (-0.23)                      |
| 1029.969 | 3127.03 <sub>,</sub>  | 5.44  | y21[2+] (-0.01)                                      |
| 1030.710 | 3112.18 <sub>,</sub>  | 5.42  |                                                      |
| 1078.745 | 31855.42 <sub>,</sub> | 55.48 | y22[2+] (0.23)                                       |
| 1079.583 | 5604.41 <sub>,</sub>  | 9.76  |                                                      |
| 1080.275 | 2023.86 <sub>,</sub>  | 3.52  | b9 (-0.18)                                           |
| 1134.249 | 1534.93 <sub>,</sub>  | 2.67  | y23o[2+] (0.21) : y23*[2+] (-0.27) : z23[2+] (-0.27) |
| 1142.972 | 2477.61 <sub>,</sub>  | 4.31  | y23[2+] (-0.06)                                      |
| 1143.667 | 3623.36 <sub>,</sub>  | 6.31  |                                                      |
| 1192.737 | 1017.79 <sub>,</sub>  | 1.77  | b10* (0.25) : y24[2+] (0.16) : b22o[2+] (-0.27)      |
| 1209.315 | 12627.39 <sub>,</sub> | 21.99 | b10 (-0.18)                                          |
| 1787.506 | 1256.56 <sub>,</sub>  | 2.18  |                                                      |
| 2058.932 | 3127.03 <sub>,</sub>  | 5.44  | y21 (-0.03)                                          |
| 2156.482 | 31855.42 <sub>,</sub> | 55.48 | y22 (0.45)                                           |
| 2158.159 | 5604.41 <sub>,</sub>  | 9.76  |                                                      |
| 2219.399 | 1125.73 <sub>,</sub>  | 1.96  | b20 (0.44)                                           |
| 2284.937 | 2477.61 <sub>,</sub>  | 4.31  | y23 (-0.12)                                          |
| 2286.326 | 3623.36 <sub>,</sub>  | 6.31  |                                                      |
| 2292.056 | 703.14 <sub>,</sub>   | 1.22  |                                                      |
| 2384.467 | 1017.79 <sub>,</sub>  | 1.77  | y24 (0.33) : b22o (-0.55)                            |
| 2417.624 | 12627.39 <sub>,</sub> | 21.99 |                                                      |



T2220 or

S2222

# ProPhosSI MS/MS report

Mass: 959.077031 Charge: 3+

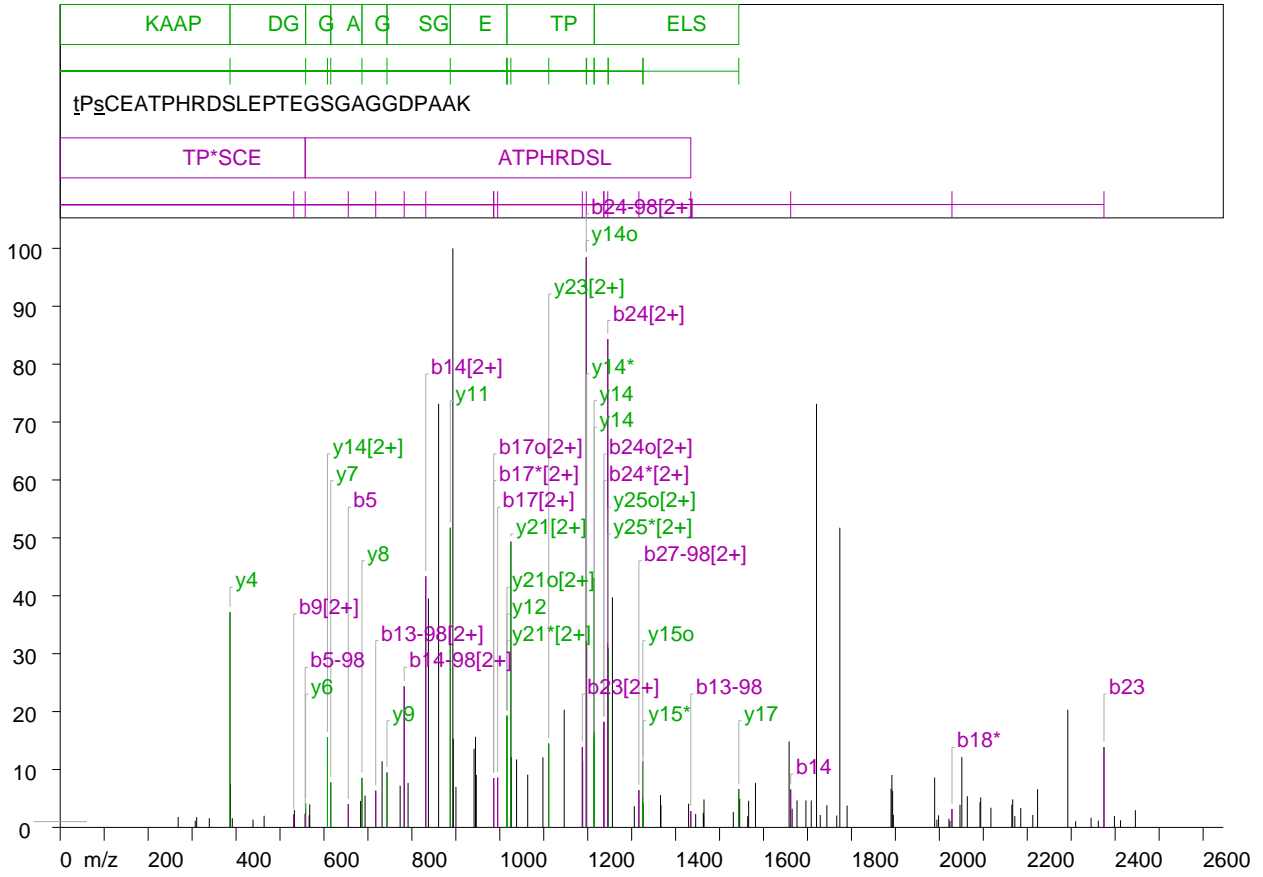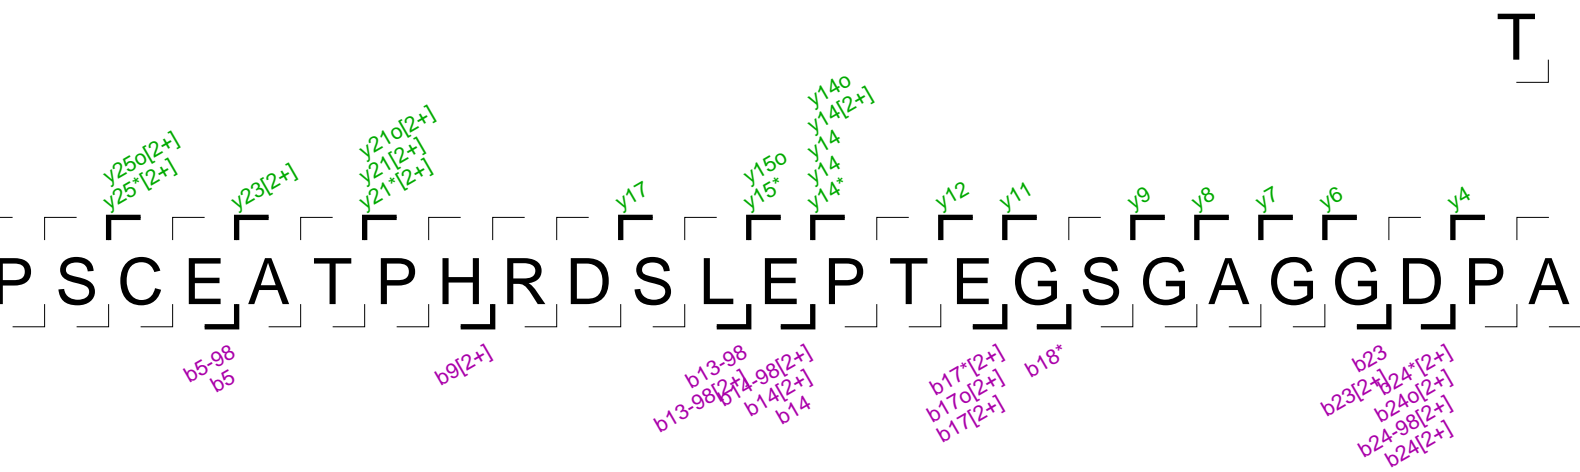

AK  
b27-98[2+]

## Cav3.2 human

(31) 2220 tP<sub>s</sub>CEATPHRDSLEPTEGSGAGGDPAAK 2247 2874.212 (-0.0052) Da

|                         |     |
|-------------------------|-----|
| Parent Ion              | m/z |
| No parent ions observed |     |

## Modifications and supporting evidence

| Position | Residue ID     | Modification | Evidence    |
|----------|----------------|--------------|-------------|
| 1 or 3   | (2220 or 2222) | Phospho (ST) | b5, y23[2+] |

## Spectrum interpretation

| Rule                                   | passed/tests | Description                                                                                                                                                                                                                                                                                                                                                                                                                                                                                                                                                                                                                             |
|----------------------------------------|--------------|-----------------------------------------------------------------------------------------------------------------------------------------------------------------------------------------------------------------------------------------------------------------------------------------------------------------------------------------------------------------------------------------------------------------------------------------------------------------------------------------------------------------------------------------------------------------------------------------------------------------------------------------|
| Parent ions present                    | 0/1          | Parent ions corresponding to the parent fragment - 1 phosphate ions were not found                                                                                                                                                                                                                                                                                                                                                                                                                                                                                                                                                      |
| Three -98 Ions present                 | 1/1          | 5 des-phospho fragment ions were found.                                                                                                                                                                                                                                                                                                                                                                                                                                                                                                                                                                                                 |
| Unique -98 transitions present         | 0/1          |                                                                                                                                                                                                                                                                                                                                                                                                                                                                                                                                                                                                                                         |
| Four Sequential b or y ions            | 1/1          | Sequence of four y ions found from y6 to y9.                                                                                                                                                                                                                                                                                                                                                                                                                                                                                                                                                                                            |
| Five of six sequential ions present    | 1/1          | Five of Six ions found between y4 and y9<br>Five of Six ions found between y6 and y11<br>Five of Six ions found between y7 and y12                                                                                                                                                                                                                                                                                                                                                                                                                                                                                                      |
| Proline directed fragmentation pattern | 5/5          | No proline ions at y27-98<br>No proline ions at b2<br/><br>PASS: y21> y20<br/><br>No proline ions at b8-98<br/><br>PASS: y14> y13<br/><br>PASS: b15-98< b14-98<br/><br>PASS: y4> y3<br/><br>PASS: b25-98< b24-98<br/>                                                                                                                                                                                                                                                                                                                                                                                                                   |
| PhosphoTyrosine transition present     | 0/0          | 0 of 0 phosphotyrosine transitions were found.                                                                                                                                                                                                                                                                                                                                                                                                                                                                                                                                                                                          |
| Six of top ten ions identified         | 6/6          | ion 1 (mass: 893.283: intensity: 1155.37) assigned 0 times<br>ion 2 (mass: 1196.767: intensity: 1137.35) assigned 3 times<br>ion 3 (mass: 1245.687: intensity: 974.38) assigned 1 times<br>ion 4 (mass: 1720.571: intensity: 845.20) assigned 0 times<br>ion 5 (mass: 860.789: intensity: 845.20) assigned 0 times<br>ion 6 (mass: 887.305: intensity: 597.95) assigned 1 times<br>ion 7 (mass: 1773.603: intensity: 597.95) assigned 0 times<br>ion 8 (mass: 1025.203: intensity: 570.18) assigned 1 times<br>ion 9 (mass: 831.619: intensity: 501.04) assigned 1 times<br>ion 10 (mass: 1214.532: intensity: 497.64) assigned 1 times |

## Ion Table

35 ions assigned of 101 ions above threshold (34%).

### N-terminal ions

| AA | N-ion | b                                               | b*                              | b-98                                         | bo                              |
|----|-------|-------------------------------------------------|---------------------------------|----------------------------------------------|---------------------------------|
| T  | 1     | 102.055                                         | 85.028                          | -                                            | 84.044                          |
| P  | 2     | 199.108                                         | 182.081                         | -                                            | 181.097                         |
| s  | 3     | 366.106                                         | 349.080                         | 268.120                                      | 348.096                         |
| C  | 4     | 526.137                                         | 509.110                         | 428.151                                      | 508.126                         |
| E  | 5     | 655.179<br>655.337 (4)                          | 638.153                         | 557.193<br>557.290 (2)                       | 637.169                         |
| A  | 6     | 726.216                                         | 709.190                         | 628.231                                      | 708.206                         |
| T  | 7     | 827.264                                         | 810.238                         | 729.278                                      | 809.254                         |
| P  | 8     | 924.317                                         | 907.290                         | 826.331                                      | 906.306                         |
| H  | 9     | 1061.376<br>531.276 [2+] (2)                    | 1044.349                        | 963.390                                      | 1043.365                        |
| R  | 10    | 1217.477                                        | 1200.450                        | 1119.491                                     | 1199.466                        |
| D  | 11    | 1332.504                                        | 1315.477                        | 1234.518                                     | 1314.493                        |
| S  | 12    | 1419.536                                        | 1402.509                        | 1321.550                                     | 1401.525                        |
| L  | 13    | 1532.620                                        | 1515.593                        | 1434.634<br>1434.538 (2)<br>717.787 [2+] (6) | 1514.609                        |
| E  | 14    | 1661.663<br>831.619 [2+] (43)<br>1661.734 (6)   | 1644.636                        | 1563.677<br>*782.544 [2+] (24)               | 1643.652                        |
| P  | 15    | 1758.715                                        | 1741.689                        | 1660.729                                     | 1740.705                        |
| T  | 16    | 1859.763                                        | 1842.737                        | 1761.777                                     | 1841.752                        |
| E  | 17    | 1988.806<br>995.157 [2+] (8)                    | 1971.779<br>*986.089 [2+] (8)   | 1890.820                                     | 1970.795<br>*986.089 [2+] (8)   |
| G  | 18    | 2045.827                                        | 2028.801<br>2028.705 (3)        | 1947.841                                     | 2027.817                        |
| S  | 19    | 2132.859                                        | 2115.833                        | 2034.873                                     | 2114.849                        |
| G  | 20    | 2189.881                                        | 2172.854                        | 2091.895                                     | 2171.870                        |
| A  | 21    | 2260.918                                        | 2243.891                        | 2162.932                                     | 2242.907                        |
| G  | 22    | 2317.939                                        | 2300.913                        | 2219.953                                     | 2299.929                        |
| G  | 23    | 2374.961<br>2374.482 (13)<br>1187.745 [2+] (13) | 2357.934                        | 2276.975                                     | 2356.950                        |
| D  | 24    | 2489.988<br>1245.687 [2+] (84)                  | 2472.961<br>*1236.729 [2+] (18) | 2392.002<br>*1196.767 [2+] (98)              | 2471.977<br>*1236.729 [2+] (18) |
| P  | 25    | 2587.040                                        | 2570.014                        | 2489.055                                     | 2569.030                        |
| A  | 26    | 2658.078                                        | 2641.051                        | 2560.092                                     | 2640.067                        |
| A  | 27    | 2729.115                                        | 2712.088                        | 2631.129<br>1316.453 [2+] (6)                | 2711.104                        |
| K  | 28    | -                                               | -                               | -                                            | -                               |

### C-terminal ions

| AA | C-ion | y        | y*                              | y-98     | yo                              |
|----|-------|----------|---------------------------------|----------|---------------------------------|
| T  | 28    | -        | -                               | -        | -                               |
| P  | 27    | 2774.172 | 2757.146                        | 2676.187 | 2756.162                        |
| s  | 26    | 2677.120 | 2660.093                        | 2579.134 | 2659.109                        |
| C  | 25    | 2510.121 | 2493.095<br>*1246.579 [2+] (30) | -        | 2492.111<br>*1246.579 [2+] (30) |

|   |    |                                                                 |                                 |   |                                 |
|---|----|-----------------------------------------------------------------|---------------------------------|---|---------------------------------|
| E | 24 | 2350.091                                                        | 2333.064                        | - | 2332.080                        |
| A | 23 | 2221.048<br>1111.346 [2+] (14)                                  | 2204.022                        | - | 2203.038                        |
| T | 22 | 2150.011                                                        | 2132.984                        | - | 2132.000                        |
| P | 21 | 2048.963<br>1025.203 [2+] (49)                                  | 2031.937<br>*1016.227 [2+] (19) | - | 2030.953<br>*1016.227 [2+] (19) |
| H | 20 | 1951.911                                                        | 1934.884                        | - | 1933.900                        |
| R | 19 | 1814.852                                                        | 1797.825                        | - | 1796.841                        |
| D | 18 | 1658.751                                                        | 1641.724                        | - | 1640.740                        |
| S | 17 | 1543.724<br>1543.749 (6)                                        | 1526.697                        | - | 1525.713                        |
| L | 16 | 1456.692                                                        | 1439.665                        | - | 1438.681                        |
| E | 15 | 1343.607                                                        | 1326.581<br>*1326.112 (4)       | - | 1325.597<br>1325.327 (11)       |
| P | 14 | 1214.565<br>1214.847 (15)<br>1214.532 (43)<br>607.927 [2+] (15) | 1197.538<br>*1197.578 (31)      | - | 1196.554<br>*1196.767 (98)      |
| T | 13 | 1117.512                                                        | 1100.486                        | - | 1099.502                        |
| E | 12 | 1016.464<br>*1016.227 (19)                                      | 999.438                         | - | 998.454                         |
| G | 11 | 887.422<br>887.305 (51)                                         | 870.395                         | - | 869.411                         |
| S | 10 | 830.400                                                         | 813.374                         | - | 812.390                         |
| G | 9  | 743.368<br>*743.426 (9)                                         | 726.342                         | - | 725.358                         |
| A | 8  | 686.347<br>*686.372 (8)                                         | 669.320                         | - | 668.336                         |
| G | 7  | 615.310<br>615.452 (7)                                          | 598.283                         | - | 597.299                         |
| G | 6  | 558.288<br>558.331 (4)                                          | 541.262                         | - | 540.278                         |
| D | 5  | 501.267                                                         | 484.240                         | - | 483.256                         |
| P | 4  | 386.240<br>*386.268 (37)                                        | 369.213                         | - | 368.229                         |
| A | 3  | 289.187                                                         | 272.161                         | - | 271.177                         |
| A | 2  | 218.150                                                         | 201.123                         | - | 200.139                         |
| K | 1  | 147.113                                                         | 130.086                         | - | 129.102                         |

### Ion distribution

| Threshold | Ion count | Matches | % matched |
|-----------|-----------|---------|-----------|
| 0         | 123       | 40      | 32        |
| 0.5       | 122       | 40      | 32        |
| 1         | 117       | 39      | 33        |
| 2         | 101       | 35      | 34        |
| 3         | 85        | 32      | 37        |
| 4         | 73        | 30      | 41        |
| 5         | 61        | 28      | 45        |
| 10        | 36        | 19      | 52        |

### Observed ions > 1%

| m/z      | Intensity            | % max | Assignment (delta)                            |
|----------|----------------------|-------|-----------------------------------------------|
| 268.313  | 20.74 <sub>3</sub>   | 1.79  | b3-98 (0.19)                                  |
| 307.113  | 13.45 <sub>3</sub>   | 1.16  |                                               |
| 310.417  | 20.48 <sub>3</sub>   | 1.77  |                                               |
| 339.116  | 18.33 <sub>3</sub>   | 1.58  |                                               |
| 386.268  | 429.47 <sub>3</sub>  | 37.17 | x9[2+] (0.08) : y4 (0.02)                     |
| 387.376  | 86.91 <sub>3</sub>   | 7.52  |                                               |
| 391.476  | 18.38 <sub>3</sub>   | 1.59  | a7o[2+] (0.34) : a7*[2+] (-0.14)              |
| 438.439  | 15.37 <sub>3</sub>   | 1.33  |                                               |
| 463.835  | 23.26 <sub>3</sub>   | 2.01  |                                               |
| 531.276  | 25.61 <sub>3</sub>   | 2.21  | b9[2+] (0.08)                                 |
| 532.727  | 34.39 <sub>3</sub>   | 2.97  |                                               |
| 557.290  | 27.32 <sub>3</sub>   | 2.36  | b5-98 (0.09)                                  |
| 558.331  | 48.51 <sub>3</sub>   | 4.19  | y6 (0.04)                                     |
| 566.323  | 24.16 <sub>3</sub>   | 2.09  |                                               |
| 567.653  | 46.04 <sub>3</sub>   | 3.98  |                                               |
| 607.927  | 180.37 <sub>3</sub>  | 15.61 | y14[2+] (0.14)                                |
| 615.452  | 89.73 <sub>3</sub>   | 7.76  | y7 (0.14)                                     |
| 655.337  | 46.25 <sub>3</sub>   | 4.00  | b5 (0.15)                                     |
| 683.455  | 52.88 <sub>3</sub>   | 4.57  |                                               |
| 686.372  | 98.81 <sub>3</sub>   | 8.55  | x15[2+] (0.06) : y8 (0.02)                    |
| 693.436  | 63.28 <sub>3</sub>   | 5.47  |                                               |
| 717.787  | 73.42 <sub>3</sub>   | 6.35  | b13-98[2+] (-0.03)                            |
| 732.210  | 131.97 <sub>3</sub>  | 11.42 |                                               |
| 743.426  | 109.77 <sub>3</sub>  | 9.50  | c6 (0.18) : y9 (0.05) : a13o[2+] (-0.38)      |
| 773.279  | 83.33 <sub>3</sub>   | 7.21  |                                               |
| 782.544  | 281.61 <sub>3</sub>  | 24.37 | a7* (0.30) : b14-98[2+] (0.20)                |
| 791.332  | 88.87 <sub>3</sub>   | 7.69  |                                               |
| 831.619  | 501.04 <sub>3</sub>  | 43.36 | b14[2+] (0.28)                                |
| 837.636  | 456.93 <sub>3</sub>  | 39.54 |                                               |
| 860.789  | 845.20 <sub>3</sub>  | 73.15 |                                               |
| 887.305  | 597.95 <sub>3</sub>  | 51.75 | y11 (-0.11)                                   |
| 893.283  | 1155.37 <sub>3</sub> | 100   |                                               |
| 894.170  | 176.66 <sub>3</sub>  | 15.29 |                                               |
| 900.230  | 80.79 <sub>3</sub>   | 6.99  |                                               |
| 941.477  | 156.79 <sub>3</sub>  | 13.57 | c8 (0.13)                                     |
| 944.690  | 180.85 <sub>3</sub>  | 15.65 |                                               |
| 946.509  | 104.66 <sub>3</sub>  | 9.05  |                                               |
| 986.089  | 98.45 <sub>3</sub>   | 8.52  | b17o[2+] (0.18) : b17*[2+] (-0.30)            |
| 995.157  | 99.50 <sub>3</sub>   | 8.61  | b17[2+] (0.25)                                |
| 1016.227 | 222.85 <sub>3</sub>  | 19.28 | y21o[2+] (0.24) : a9* (-0.12) : y12 (-0.23) : |

|          |          |       |                                                      |
|----------|----------|-------|------------------------------------------------------|
| -        | -        | -     | y21*[2+] (-0.24) : z21[2+] (-0.24)                   |
| 1025.203 | 570.18,  | 49.35 | y21[2+] (0.21)                                       |
| 1026.053 | 140.20,  | 12.13 |                                                      |
| 1038.196 | 135.60,  | 11.73 |                                                      |
| 1063.514 | 105.07,  | 9.09  |                                                      |
| 1098.084 | 139.83,  | 12.10 |                                                      |
| 1111.346 | 167.48,  | 14.49 | y23[2+] (0.31)                                       |
| 1146.573 | 234.59,  | 20.30 |                                                      |
| 1187.745 | 160.34,  | 13.87 | b23[2+] (-0.23)                                      |
| 1188.494 | 133.12,  | 11.52 |                                                      |
| 1196.767 | 1137.35, | 98.44 | c23[2+] (0.26) : b24-98[2+] (0.26) : y14o (0.21)     |
| 1197.578 | 361.40,  | 31.28 | y14* (0.03) : z14 (0.03)                             |
| 1214.532 | 497.64,  | 43.07 | y14 (-0.03)                                          |
| 1214.847 | 180.37,  | 15.61 | y14 (0.28)                                           |
| 1236.729 | 210.59,  | 18.22 | b24o[2+] (0.23) : b24*[2+] (-0.25)                   |
| 1245.687 | 974.38,  | 84.33 | b24[2+] (0.18)                                       |
| 1246.579 | 357.00,  | 30.89 | y25o[2+] (0.01) : y25*[2+] (-0.47) : z25[2+] (-0.47) |
| 1256.193 | 459.05,  | 39.73 |                                                      |
| 1306.033 | 42.20,   | 3.65  |                                                      |
| 1316.453 | 74.45,   | 6.44  | b27-98[2+] (0.38)                                    |
| 1325.327 | 131.41,  | 11.37 | y15o (-0.27)                                         |
| 1326.112 | 48.29,   | 4.17  | y15* (-0.46) : z15 (-0.46)                           |
| 1365.639 | 64.42,   | 5.57  |                                                      |
| 1366.637 | 44.24,   | 3.82  |                                                      |
| 1429.560 | 47.30,   | 4.09  |                                                      |
| 1434.538 | 32.24,   | 2.79  | b13-98 (-0.09)                                       |
| 1445.633 | 26.87,   | 2.32  |                                                      |
| 1462.982 | 29.09,   | 2.51  |                                                      |
| 1463.716 | 26.28,   | 2.27  |                                                      |
| 1464.559 | 55.66,   | 4.81  |                                                      |
| 1531.314 | 30.93,   | 2.67  |                                                      |
| 1543.749 | 76.57,   | 6.62  | y17 (0.02)                                           |
| 1545.757 | 56.90,   | 4.92  |                                                      |
| 1563.923 | 22.36,   | 1.93  | b14-98 (0.24)                                        |
| 1566.122 | 53.18,   | 4.60  |                                                      |
| 1581.656 | 88.87,   | 7.69  |                                                      |
| 1658.189 | 171.51,  | 14.84 |                                                      |
| 1661.734 | 75.73,   | 6.55  | b14 (0.07)                                           |
| 1665.078 | 37.22,   | 3.22  |                                                      |
| 1676.146 | 53.86,   | 4.66  |                                                      |
| 1696.378 | 53.83,   | 4.65  |                                                      |

|          |         |       |              |
|----------|---------|-------|--------------|
| 1708.508 | 53.69,  | 4.64  |              |
| 1720.571 | 845.20, | 73.15 |              |
| 1728.996 | 24.72,  | 2.13  |              |
| 1744.114 | 44.24,  | 3.82  |              |
| 1766.539 | 23.74,  | 2.05  |              |
| 1773.603 | 597.95, | 51.75 |              |
| 1790.116 | 43.62,  | 3.77  |              |
| 1890.058 | 77.45,  | 6.70  |              |
| 1892.011 | 104.66, | 9.05  |              |
| 1893.735 | 72.52,  | 6.27  |              |
| 1895.294 | 24.93,  | 2.15  |              |
| 1989.307 | 99.50,  | 8.61  |              |
| 1994.476 | 15.37,  | 1.33  |              |
| 1998.192 | 24.08,  | 2.08  |              |
| 2021.799 | 17.38,  | 1.50  |              |
| 2023.999 | 12.85,  | 1.11  |              |
| 2028.705 | 36.58,  | 3.16  | b18* (-0.09) |
| 2046.922 | 45.03,  | 3.89  |              |
| 2051.099 | 140.20, | 12.13 |              |
| 2063.612 | 62.18,  | 5.38  |              |
| 2092.488 | 50.19,  | 4.34  |              |
| 2094.080 | 59.86,  | 5.18  |              |
| 2117.239 | 39.22,  | 3.39  |              |
| 2164.895 | 45.35,  | 3.92  |              |
| 2166.854 | 55.95,  | 4.84  |              |
| 2171.703 | 22.45,  | 1.94  | b20o (-0.16) |
| 2185.152 | 38.48,  | 3.33  |              |
| 2212.546 | 24.78,  | 2.14  |              |
| 2223.429 | 76.09,  | 6.58  |              |
| 2292.139 | 234.59, | 20.30 |              |
| 2310.072 | 12.36,  | 1.06  |              |
| 2345.149 | 19.32,  | 1.67  |              |
| 2361.641 | 13.46,  | 1.16  |              |
| 2374.482 | 160.34, | 13.87 | b23 (-0.47)  |
| 2398.246 | 22.99,  | 1.98  |              |
| 2412.150 | 14.20,  | 1.22  |              |
| 2445.981 | 34.27   | 2.96  |              |



S2231

# ProPhosSI MS/MS report

Mass: 758.584434 Charge: 4+

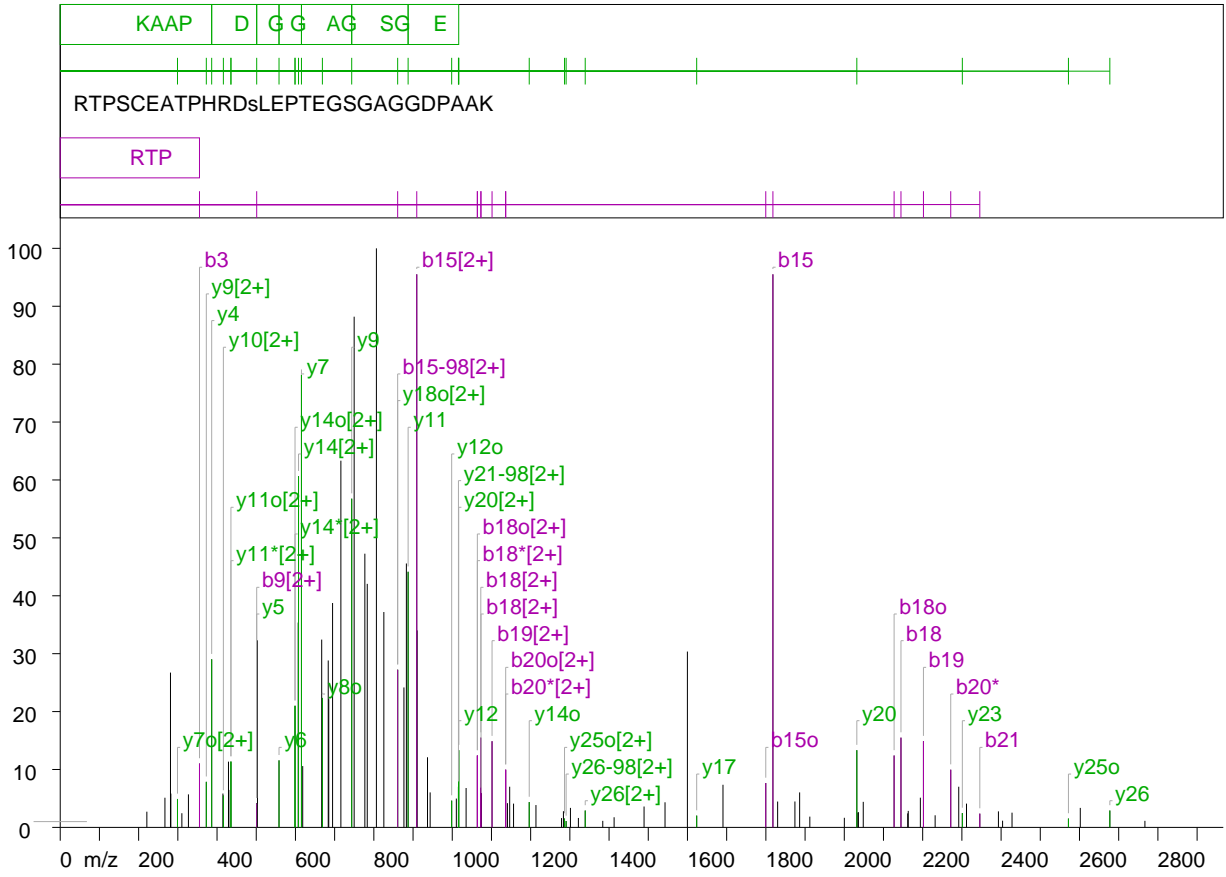

RT

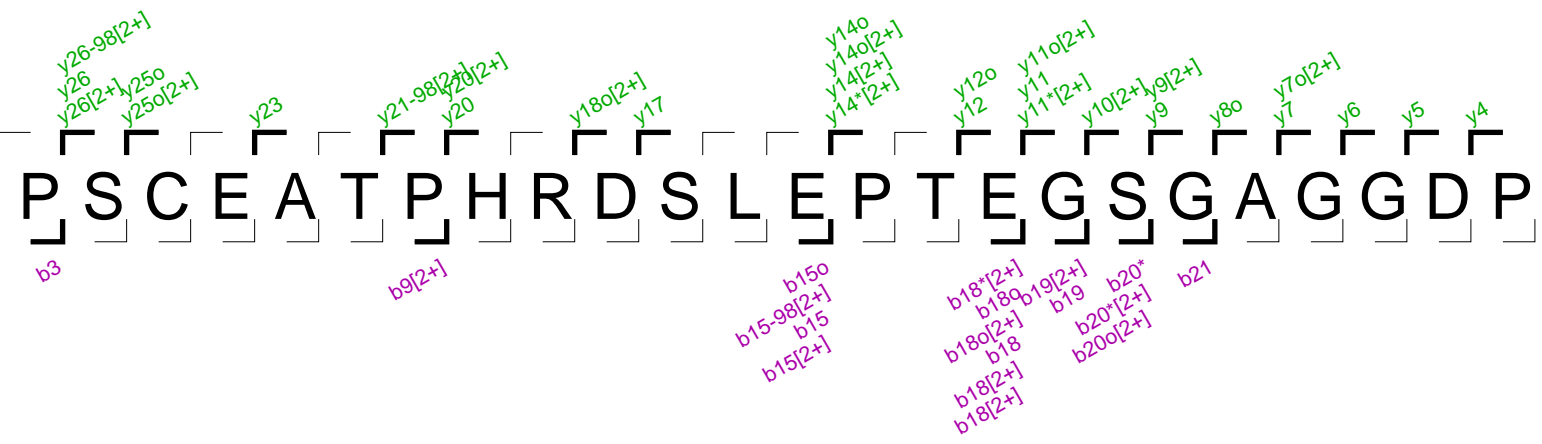

AAK

## Cav3.2 human

(26) 2219  $\text{RTPSCEATPHRDsLEPTEGSGAGGDPAAK 2247 3030.313 (-0.0075) Da}$

|                         |     |
|-------------------------|-----|
| Parent Ion              | m/z |
| No parent ions observed |     |

## Modifications and supporting evidence

| Position | Residue ID | Modification | Evidence     |
|----------|------------|--------------|--------------|
| 13       | (2231)     | Phospho (ST) | y14[2+]=>y20 |

## Spectrum interpretation

| Rule                                   | passed/tests | Description                                                                                                                                                                                                                                                                                                                                                                                                                                                                                                                                                                                                                      |
|----------------------------------------|--------------|----------------------------------------------------------------------------------------------------------------------------------------------------------------------------------------------------------------------------------------------------------------------------------------------------------------------------------------------------------------------------------------------------------------------------------------------------------------------------------------------------------------------------------------------------------------------------------------------------------------------------------|
| Parent ions present                    | 0/1          | Parent ions corresponding to the parent fragment - 1 phosphate ions were not found                                                                                                                                                                                                                                                                                                                                                                                                                                                                                                                                               |
| Three -98 Ions present                 | 1/1          | 3 des-phospho fragment ions were found.                                                                                                                                                                                                                                                                                                                                                                                                                                                                                                                                                                                          |
| Unique -98 transitions present         | 1/1          | transition b9[2+] to b15-98 [2+], transition y14[2+] to y21-98 [2+] support unique phosphorylation at position 13                                                                                                                                                                                                                                                                                                                                                                                                                                                                                                                |
| Four Sequential b or y ions            | 1/1          | Sequence of four y ions found from y4 to y7.                                                                                                                                                                                                                                                                                                                                                                                                                                                                                                                                                                                     |
| Five of six sequential ions present    | 1/1          | Five of Six ions found between y4 and y9<br>Five of Six ions found between y5 and y10<br>Five of Six ions found between y6 and y11<br>Five of Six ions found between y7 and y12<br>Five of Six ions found between y9 and y14                                                                                                                                                                                                                                                                                                                                                                                                     |
| Proline directed fragmentation pattern | 4/7          | FAIL: y27-98< y26-98<br/>FAIL: b3> b2<br/>PASS: y21-98> y20-98<br/><br>FAIL: b9> b8<br/>PASS: y14> y13<br/><br>PASS: b16-98< b15-98<br/><br>PASS: y4> y3<br/><br>No proline ions at b26-98<br/>                                                                                                                                                                                                                                                                                                                                                                                                                                  |
| PhosphoTyrosine transition present     | 0/0          | 0 of 0 phosphotyrosine transitions were found.                                                                                                                                                                                                                                                                                                                                                                                                                                                                                                                                                                                   |
| Six of top ten ions identified         | 5/6          | ion 1 (mass: 806.486: intensity: 561.98) assigned 0 times<br>ion 2 (mass: 1817.941: intensity: 536.77) assigned 1 times<br>ion 3 (mass: 909.474: intensity: 536.77) assigned 1 times<br>ion 4 (mass: 749.767: intensity: 495.65) assigned 0 times<br>ion 5 (mass: 615.315: intensity: 439.25) assigned 1 times<br>ion 6 (mass: 715.909: intensity: 355.90) assigned 0 times<br>ion 7 (mass: 607.815: intensity: 340.79) assigned 1 times<br>ion 8 (mass: 743.491: intensity: 319.02) assigned 1 times<br>ion 9 (mass: 777.081: intensity: 265.63) assigned 0 times<br>ion 10 (mass: 883.014: intensity: 256.15) assigned 0 times |

## Ion Table

49 ions assigned of 104 ions above threshold (47%).

N-terminal ions

| AA | N-ion | b                                                                    | b*                                             | b-98                           | bo                                               |
|----|-------|----------------------------------------------------------------------|------------------------------------------------|--------------------------------|--------------------------------------------------|
| R  | 1     | 157.108                                                              | 140.082                                        | -                              | 139.098                                          |
| T  | 2     | 258.156                                                              | 241.130                                        | -                              | 240.146                                          |
| P  | 3     | 355.209<br>355.230 (11)                                              | 338.182                                        | -                              | 337.198                                          |
| S  | 4     | 442.241                                                              | 425.214                                        | -                              | 424.230                                          |
| C  | 5     | 602.272                                                              | 585.245                                        | -                              | 584.261                                          |
| E  | 6     | 731.314                                                              | 714.288                                        | -                              | 713.304                                          |
| A  | 7     | 802.351                                                              | 785.325                                        | -                              | 784.341                                          |
| T  | 8     | 903.399                                                              | 886.372                                        | -                              | 885.388                                          |
| P  | 9     | 1000.452<br>*501.167 [2+] (4)                                        | 983.425                                        | -                              | 982.441                                          |
| H  | 10    | 1137.511                                                             | 1120.484                                       | -                              | 1119.500                                         |
| R  | 11    | 1293.612                                                             | 1276.585                                       | -                              | 1275.601                                         |
| D  | 12    | 1408.639                                                             | 1391.612                                       | -                              | 1390.628                                         |
| s  | 13    | 1575.637                                                             | 1558.611                                       | 1477.651                       | 1557.626                                         |
| L  | 14    | 1688.721                                                             | 1671.695                                       | 1590.735                       | 1670.711                                         |
| E  | 15    | 1817.764<br>1817.941 (95)<br>909.474 [2+] (95)                       | 1800.737                                       | 1719.778<br>*860.770 [2+] (27) | 1799.753<br>1799.760 (7)                         |
| P  | 16    | 1914.816                                                             | 1897.790                                       | 1816.831                       | 1896.806                                         |
| T  | 17    | 2015.864                                                             | 1998.838                                       | 1917.878                       | 1997.854                                         |
| E  | 18    | 2144.907<br>2144.592 (15)<br>1072.799 [2+] (15)<br>1073.415 [2+] (5) | 2127.880<br>*1064.064 [2+] (12)                | 2046.921                       | 2126.896<br>2127.120 (12)<br>*1064.064 [2+] (12) |
| G  | 19    | 2201.928<br>1101.498 [2+] (14)<br>2201.988 (14)                      | 2184.902                                       | 2103.942                       | 2183.918                                         |
| S  | 20    | 2288.960                                                             | 2271.934<br>2271.546 (9)<br>*1136.276 [2+] (9) | 2190.974                       | 2270.950<br>*1136.276 [2+] (9)                   |
| G  | 21    | 2345.982<br>2345.702 (2)                                             | 2328.955                                       | 2247.996                       | 2327.971                                         |
| A  | 22    | 2417.019                                                             | 2399.992                                       | 2319.033                       | 2399.008                                         |
| G  | 23    | 2474.040                                                             | 2457.014                                       | 2376.054                       | 2456.030                                         |
| G  | 24    | 2531.062                                                             | 2514.035                                       | 2433.076                       | 2513.051                                         |
| D  | 25    | 2646.089                                                             | 2629.062                                       | 2548.103                       | 2628.078                                         |
| P  | 26    | 2743.142                                                             | 2726.115                                       | 2645.156                       | 2725.131                                         |
| A  | 27    | 2814.179                                                             | 2797.152                                       | 2716.193                       | 2796.168                                         |
| A  | 28    | 2885.216                                                             | 2868.189                                       | 2787.230                       | 2867.205                                         |
| K  | 29    | -                                                                    | -                                              | -                              | -                                                |

C-terminal ions

| AA | C-ion | y                             | y*       | y-98                          | yo       |
|----|-------|-------------------------------|----------|-------------------------------|----------|
| R  | 29    | -                             | -        | -                             | -        |
| T  | 28    | 2875.220                      | 2858.194 | 2777.234                      | 2857.210 |
| P  | 27    | 2774.172                      | 2757.146 | 2676.187                      | 2756.162 |
| S  | 26    | 2677.120<br>1339.202 [2+] (2) | 2660.093 | 2579.134<br>1290.459 [2+] (1) | 2659.109 |

|   |    |                                                  |                                |                               |                                                |
|---|----|--------------------------------------------------|--------------------------------|-------------------------------|------------------------------------------------|
| - | -  | 2677.396 (2)                                     | -                              | -                             | -                                              |
| C | 25 | 2590.088                                         | 2573.061                       | 2492.102                      | 2572.077<br>1286.413 [2+] (1)<br>2571.819 (1)  |
| E | 24 | 2430.057                                         | 2413.031                       | 2332.071                      | 2412.046                                       |
| A | 23 | 2301.014<br>*2301.138 (2)                        | 2283.988                       | 2203.029                      | 2283.004                                       |
| T | 22 | 2229.977                                         | 2212.951                       | 2131.991                      | 2211.967                                       |
| P | 21 | 2128.930                                         | 2111.903                       | 2030.944<br>1015.792 [2+] (7) | 2110.919                                       |
| H | 20 | 2031.877<br>2031.998 (13)<br>*1016.503 [2+] (13) | 2014.850                       | 1933.891                      | 2013.866                                       |
| R | 19 | 1894.818                                         | 1877.791                       | 1796.832                      | 1876.807                                       |
| D | 18 | 1738.717                                         | 1721.690                       | 1640.731                      | 1720.706<br>*860.770 [2+] (27)                 |
| s | 17 | 1623.690<br>1623.493 (2)                         | 1606.663                       | 1525.704                      | 1605.679                                       |
| L | 16 | 1456.692                                         | 1439.665                       | -                             | 1438.681                                       |
| E | 15 | 1343.607                                         | 1326.581                       | -                             | 1325.597                                       |
| P | 14 | 1214.565<br>607.815 [2+] (60)                    | 1197.538<br>*598.950 [2+] (21) | -                             | 1196.554<br>*598.950 [2+] (21)<br>1196.369 (4) |
| T | 13 | 1117.512                                         | 1100.486                       | -                             | 1099.502                                       |
| E | 12 | 1016.464<br>*1016.503 (13)                       | 999.438                        | -                             | 998.454<br>998.514 (4)                         |
| G | 11 | 887.422<br>887.426 (44)                          | 870.395<br>*435.432 [2+] (11)  | -                             | 869.411<br>*435.432 [2+] (11)                  |
| S | 10 | 830.400<br>416.172 [2+] (5)                      | 813.374                        | -                             | 812.390                                        |
| G | 9  | 743.368<br>743.491 (56)<br>*372.647 [2+] (7)     | 726.342                        | -                             | 725.358                                        |
| A | 8  | 686.347                                          | 669.320                        | -                             | 668.336<br>668.771 (22)                        |
| G | 7  | 615.310<br>615.315 (78)                          | 598.283                        | -                             | 597.299<br>299.114 [2+] (4)                    |
| G | 6  | 558.288<br>558.121 (11)                          | 541.262                        | -                             | 540.278                                        |
| D | 5  | 501.267<br>*501.167 (4)                          | 484.240                        | -                             | 483.256                                        |
| P | 4  | 386.240<br>*386.330 (29)                         | 369.213                        | -                             | 368.229                                        |
| A | 3  | 289.187                                          | 272.161                        | -                             | 271.177                                        |
| A | 2  | 218.150                                          | 201.123                        | -                             | 200.139                                        |
| K | 1  | 147.113                                          | 130.086                        | -                             | 129.102                                        |

### Ion distribution

| Threshold | Ion count | Matches | % matched |
|-----------|-----------|---------|-----------|
| 0         | 110       | 49      | 44        |
| 0.5       | 110       | 49      | 44        |
| 1         | 104       | 49      | 47        |
| 2         | 93        | 46      | 49        |
| 3         | 78        | 38      | 48        |

|    |    |    |    |
|----|----|----|----|
| 4  | 74 | 37 | 50 |
| 5  | 61 | 33 | 54 |
| 10 | 41 | 23 | 56 |

### Observed ions > 1%

| m/z     | Intensity           | % max | Assignment (delta)                                   |
|---------|---------------------|-------|------------------------------------------------------|
| 220.967 | 15.25 <sub>,</sub>  | 2.71  |                                                      |
| 267.080 | 28.80 <sub>,</sub>  | 5.12  |                                                      |
| 281.227 | 150.24 <sub>,</sub> | 26.73 |                                                      |
| 282.178 | 32.84 <sub>,</sub>  | 5.84  |                                                      |
| 299.114 | 27.59 <sub>,</sub>  | 4.90  | y7o[2+] (-0.03)                                      |
| 310.288 | 13.76 <sub>,</sub>  | 2.44  | c5[2+] (0.13) : a3* (0.10)                           |
| 327.026 | 32.05 <sub>,</sub>  | 5.70  | a3 (-0.18)                                           |
| 355.230 | 61.94 <sub>,</sub>  | 11.02 | b3 (0.02)                                            |
| 372.647 | 44.23 <sub>,</sub>  | 7.87  | y9[2+] (0.45) : c3 (0.41)                            |
| 386.330 | 163.18 <sub>,</sub> | 29.03 | x9[2+] (0.14) : y4 (0.08)                            |
| 415.033 | 32.87 <sub>,</sub>  | 5.84  |                                                      |
| 416.172 | 30.87 <sub>,</sub>  | 5.49  | y10[2+] (0.46)                                       |
| 429.179 | 63.82 <sub>,</sub>  | 11.35 | a8o[2+] (-0.02)                                      |
| 430.139 | 36.37 <sub>,</sub>  | 6.47  | a8*[2+] (0.44) : x10[2+] (0.43)                      |
| 435.432 | 63.86 <sub>,</sub>  | 11.36 | y11o[2+] (0.22) : z11[2+] (-0.26) : y11*[2+] (-0.26) |
| 501.167 | 23.35 <sub>,</sub>  | 4.15  | b9[2+] (0.43) : y5 (-0.10)                           |
| 501.778 | 23.44 <sub>,</sub>  | 4.17  |                                                      |
| 503.129 | 181.56 <sub>,</sub> | 32.30 |                                                      |
| 558.121 | 65.06 <sub>,</sub>  | 11.57 | y6 (-0.16)                                           |
| 598.950 | 118.02 <sub>,</sub> | 21.00 | y14o[2+] (0.16) : y14*[2+] (-0.32) : z14[2+] (-0.32) |
| 607.041 | 198.79 <sub>,</sub> | 35.37 |                                                      |
| 607.815 | 340.79 <sub>,</sub> | 60.64 | y14[2+] (0.02)                                       |
| 615.315 | 439.25 <sub>,</sub> | 78.16 | y7 (0.00)                                            |
| 618.563 | 59.53 <sub>,</sub>  | 10.59 |                                                      |
| 667.004 | 182.28 <sub>,</sub> | 32.43 |                                                      |
| 668.771 | 125.63 <sub>,</sub> | 22.35 | y8o (0.43)                                           |
| 683.637 | 162.00 <sub>,</sub> | 28.82 |                                                      |
| 685.006 | 124.45 <sub>,</sub> | 22.14 | a6o (-0.30)                                          |
| 694.699 | 217.78 <sub>,</sub> | 38.75 |                                                      |
| 715.909 | 355.90 <sub>,</sub> | 63.32 |                                                      |
| 743.491 | 319.02 <sub>,</sub> | 56.76 | y9 (0.12)                                            |
| 749.767 | 495.65 <sub>,</sub> | 88.19 |                                                      |
| 777.081 | 265.63 <sub>,</sub> | 47.26 |                                                      |
| 783.164 | 236.37 <sub>,</sub> | 42.06 |                                                      |
| 806.486 | 561.98 <sub>,</sub> | 100   |                                                      |

|          |         |       |                                                  |
|----------|---------|-------|--------------------------------------------------|
| 825.532  | 209.01, | 37.19 |                                                  |
| 860.770  | 153.01, | 27.22 | b15-98[2+] (0.37) :<br>y18o[2+] (-0.08)          |
| 876.747  | 135.82, | 24.16 |                                                  |
| 883.014  | 256.15, | 45.57 |                                                  |
| 887.426  | 248.09, | 44.14 | y11 (0.00)                                       |
| 909.474  | 536.77, | 95.51 | b15[2+] (0.08)                                   |
| 910.373  | 191.16, | 34.01 |                                                  |
| 936.852  | 68.06,  | 12.11 |                                                  |
| 943.579  | 33.96,  | 6.04  | a16[2+] (-0.33)                                  |
| 998.514  | 25.97,  | 4.62  | y12o (0.05)                                      |
| 1010.454 | 27.98,  | 4.97  |                                                  |
| 1015.792 | 39.43,  | 7.01  | y21-98[2+] (-0.18)                               |
| 1016.503 | 74.94,  | 13.33 | y20[2+] (0.06) : y12 (0.03) :<br>c17[2+] (-0.44) |
| 1035.295 | 38.23,  | 6.80  |                                                  |
| 1064.064 | 69.77,  | 12.41 | b18o[2+] (0.11) : b18*[2+]<br>(-0.38)            |
| 1072.799 | 87.11,  | 15.50 | b18[2+] (-0.15)                                  |
| 1073.415 | 33.40,  | 5.94  | b18[2+] (0.45)                                   |
| 1074.450 | 33.19,  | 5.90  |                                                  |
| 1101.498 | 83.65,  | 14.88 | b19[2+] (0.02)                                   |
| 1136.276 | 56.00,  | 9.96  | b20o[2+] (0.29) : b20*[2+]<br>(-0.19)            |
| 1140.796 | 23.52,  | 4.18  |                                                  |
| 1146.502 | 39.47,  | 7.02  |                                                  |
| 1156.376 | 23.08,  | 4.10  |                                                  |
| 1196.369 | 24.55,  | 4.36  | y14o (-0.18)                                     |
| 1213.508 | 21.68,  | 3.85  |                                                  |
| 1278.764 | 9.04,   | 1.60  |                                                  |
| 1283.562 | 15.72,  | 2.79  |                                                  |
| 1286.413 | 8.55,   | 1.52  | y25o[2+] (-0.12)                                 |
| 1290.459 | 6.17,   | 1.09  | y26-98[2+] (0.38)                                |
| 1301.507 | 18.93,  | 3.36  | a25*[2+] (0.46)                                  |
| 1321.745 | 9.16,   | 1.62  |                                                  |
| 1339.202 | 16.37,  | 2.91  | y26[2+] (0.13)                                   |
| 1383.936 | 6.36,   | 1.13  |                                                  |
| 1412.851 | 9.84,   | 1.75  |                                                  |
| 1489.288 | 20.27,  | 3.60  |                                                  |
| 1542.729 | 24.37,  | 4.33  |                                                  |
| 1599.810 | 170.66, | 30.36 |                                                  |
| 1623.493 | 11.43,  | 2.03  | y17 (-0.19)                                      |
| 1690.573 | 41.38,  | 7.36  |                                                  |
| 1799.760 | 43.06,  | 7.66  | b15o (0.00)                                      |
| 1817.941 | 536.77, | 95.51 | b15 (0.17)                                       |

|          |        |       |                          |
|----------|--------|-------|--------------------------|
| 1829.981 | 25.09, | 4.46  |                          |
| 1874.112 | 25.14, | 4.47  |                          |
| 1886.150 | 33.96, | 6.04  |                          |
| 1912.101 | 10.45, | 1.85  |                          |
| 2000.175 | 9.32,  | 1.65  |                          |
| 2031.998 | 74.94, | 13.33 | y20 (0.12)               |
| 2034.645 | 14.37, | 2.55  |                          |
| 2036.010 | 14.78, | 2.62  |                          |
| 2048.427 | 24.80, | 4.41  |                          |
| 2127.120 | 69.77, | 12.41 | b18o (0.22)              |
| 2144.592 | 87.11, | 15.50 | b18 (-0.31)              |
| 2161.846 | 13.61, | 2.42  | c18 (-0.08)              |
| 2163.160 | 16.03, | 2.85  |                          |
| 2194.096 | 28.84, | 5.13  |                          |
| 2201.988 | 83.65, | 14.88 | b19 (0.05)               |
| 2231.747 | 11.75, | 2.09  |                          |
| 2271.546 | 56.00, | 9.96  | b20* (-0.38)             |
| 2291.997 | 39.47, | 7.02  |                          |
| 2301.138 | 13.92, | 2.47  | a21* (0.17) : y23 (0.12) |
| 2311.745 | 23.08, | 4.10  |                          |
| 2345.702 | 13.36, | 2.37  | b21 (-0.28)              |
| 2393.196 | 15.56, | 2.76  |                          |
| 2403.819 | 6.51,  | 1.15  |                          |
| 2427.945 | 14.30, | 2.54  | a23o (-0.09)             |
| 2571.819 | 8.55,  | 1.52  | y25o (-0.25)             |
| 2602.008 | 18.93, | 3.36  |                          |
| 2677.396 | 16.37, | 2.91  | y26 (0.27)               |
| 2766.864 | 6.36   | 1.13  |                          |
